# Supplementary material for: ATAC-Seq Identifies Chromatin Landscapes Linked to the Regulation of Oxidative Stress in the Human Fungal Pathogen Candida albicans
Source: MDPI journal article supplement (doi:10.3390/jof6030182), 2020-09-21
Supplement: s1 [file s1]

**ATAC-seq identifies chromatin landscapes linked to the regulation of oxidative stress in the human fungal pathogen *Candida albicans***

Sabrina Jenull<sup>1,\*</sup>, Michael Tscherner<sup>1,\*</sup>, Theresia Mair<sup>1</sup> and Karl Kuchler<sup>1,#</sup>

From the

<sup>1</sup>Department of Medical Biochemistry, Max Perutz Labs Vienna, Medical University of Vienna, Campus Vienna Biocenter, Dr. Bohr-Gasse 9/2, A-1030 Vienna

Running title: ATACing fungal chromatin

\* contributed equally

# To whom correspondence should be addressed

e-mail: [karl.kuchler@meduniwien.ac.at](mailto:karl.kuchler@meduniwien.ac.at)

**Figures:**

**Figure S1:** Number of mapped ATAC-seq reads to each *C. albicans* chromosome.

**Figure S2:** Analysis of genes with decreased chromatin accessibility in regions upstream their TSS.

**Figure S3:** PCA of detected nucleosome-free ATAC-seq peaks.

**Tables:**

**Table S1:** Nextera primers used for ATAC-seq library preparation

**Table S2:** K-means clustering result and transcriptional regulation of associated genes

**Table S3:** MACS2 peak calling and edgeR analysis result

**Table S4:** Merged ATAC-seq and RNA-seq result

**Table S5:** Peaks upstream of genes with altered chromatin accessibility upon oxidative stress without changes in gene expression

# Figure S1

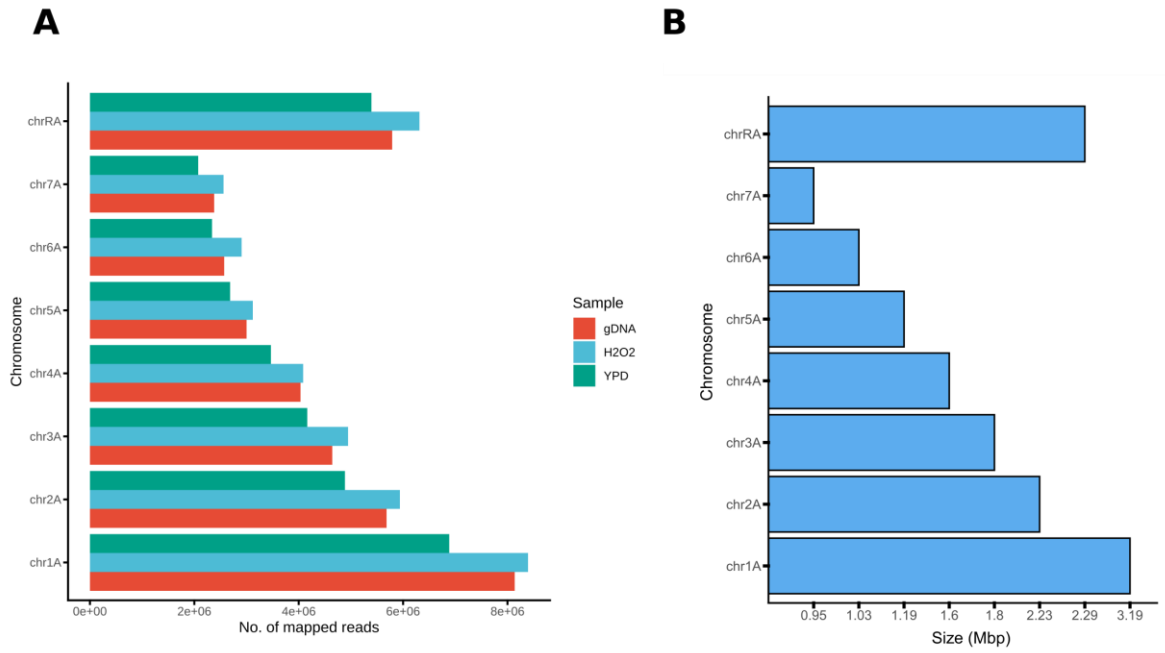

48  
49  
50  
51  
52  
53  
54  
55  
56  
57

**Figure S1. Number of mapped ATAC-seq reads to each *C. albicans* chromosome.**

**A-B)** The aligned reads from each biological replicate of the gDNA, H<sub>2</sub>O<sub>2</sub>-treated (H<sub>2</sub>O<sub>2</sub>) and non-treated (YPD) ATAC-seq libraries were merged and the number of mapped reads (x-axis) per chromosome (y-axis) was plotted (A). As comparison, the total size (in Mbp) of each *C. albicans* chromosome is presented as well (B).

# Figure S2

A

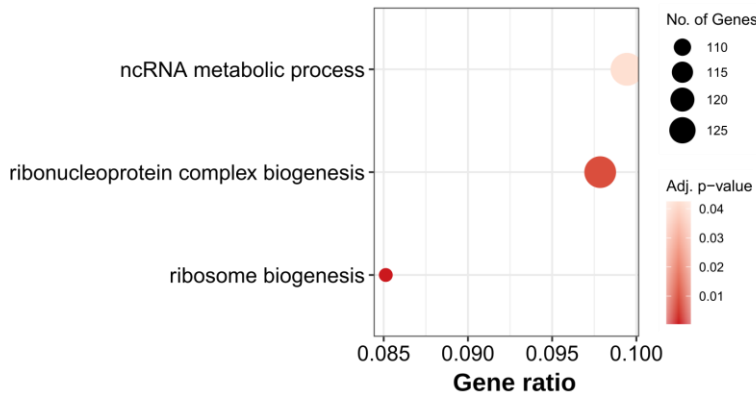

B

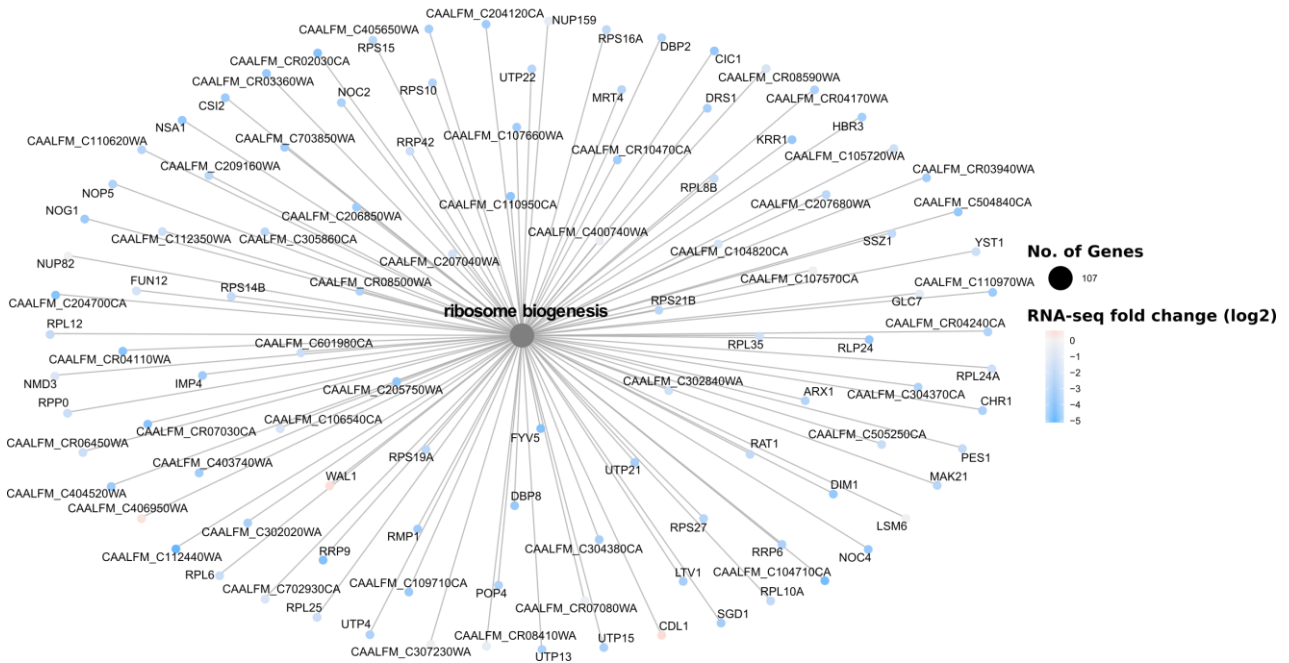

58

59 **Figure S2. Analysis of genes with decreased chromatin accessibility in regions upstream their TSS.**

60 **A-B)** Genomic regions from cluster 4 (see Figure 2C-D) were annotated to the next downstream gene and

61 subjected to GO term enrichment analysis. Enriched biological processes are represented as dotplot (A) and

62 cnet plot for the biological process "ribosome biogenesis" (B). The cnet plot depicts the genes associated with

63 the presented GO term and the log2-fold change from RNA-seq data overlaid as color gradient. See figure

64 legend from Figure 2E for detailed description.

65

66

67

68

## Figure S3

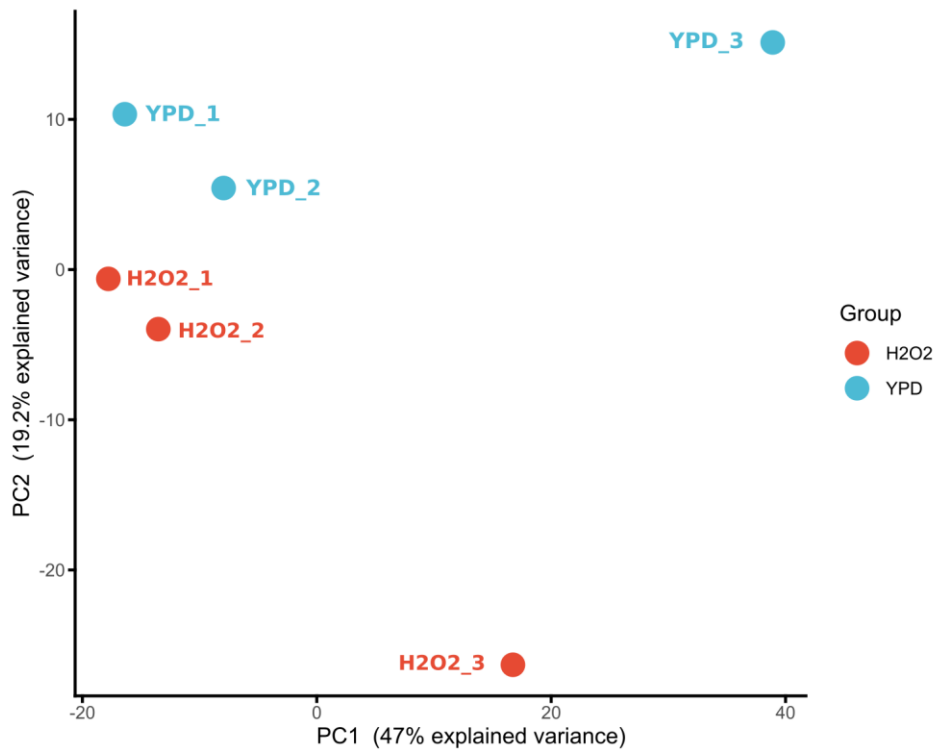

69

70 **Figure S3. PCA of detected nucleosome-free ATAC-seq peaks.**

71 Called nucleosome-free ATAC-seq peaks from all samples were merged and subjected to PCA based on the  
72 presence or absence of ATAC-seq peaks in each replicate and condition (YPD and H<sub>2</sub>O<sub>2</sub>). Each dot in blue  
73 represents three biological replicates from YPD-grown cells (YPD) and each dot in red represents three  
74 biological replicates of H<sub>2</sub>O<sub>2</sub>-treated samples (H<sub>2</sub>O<sub>2</sub>). The x-axis shows the principal component 1 (PC1) and the  
75 y-axis the principal component 2 (PC2).

76

77

78

79

80

81

82

83

84

85

86

87

88 **Table S1. Nextera primers used for ATAC-seq library preparation.**

| <b>name</b>     | <b>barcode</b> | <b>sequence (5' -&gt; 3')</b>                           |
|-----------------|----------------|---------------------------------------------------------|
| Ad1_noMX        |                | AATGATACGGCGACCACCGAGATCTACACTCGTCGGCAGCGTCAGATGTG      |
| Ad2.30_TTGCTAAG | TTGCTAAG       | CAAGCAGAAGACGGCATAACGAGATCTTAGCAAGTCTCGTGGGCTCGGAGATGT  |
| Ad2.31_ATAAGTTA | ATAAGTTA       | CAAGCAGAAGACGGCATAACGAGATTAACCTTATGTCTCGTGGGCTCGGAGATGT |
| Ad2.32_ATCACTCG | ATCACTCG       | CAAGCAGAAGACGGCATAACGAGATCGAGTGATGTCTCGTGGGCTCGGAGATGT  |
| Ad2.33_GTTAACAG | GTTAACAG       | CAAGCAGAAGACGGCATAACGAGATCTGTTAACGTCTCGTGGGCTCGGAGATGT  |
| Ad2.38_GAAATGCC | GAAATGCC       | CAAGCAGAAGACGGCATAACGAGATGGCATTTCGTCTCGTGGGCTCGGAGATGT  |
| Ad2.39_AACGCCAT | AACGCCAT       | CAAGCAGAAGACGGCATAACGAGATATGGCGTTGTCTCGTGGGCTCGGAGATGT  |

89
