# Supplementary material for: ATAC-Seq Identifies Chromatin Landscapes Linked to the Regulation of Oxidative Stress in the Human Fungal Pathogen Candida albicans
Source: J Fungi (Basel). 2020 Sep 21;6(3):182. doi: 10.3390/jof6030182 (PMC7559329; doi:10.3390/jof6030182)
Supplement: Supplementary file 1 [file jof-06-00182-s001.zip]

Archive with 8 entries (8 files):
- FigureS1.pdf
- FigureS2.pdf
- FigureS3.pdf
- jof-930743-Suppl_Materials_JoF_R1.pdf
- TableS2.xlsx
- TableS3.xlsx
- TableS4.xlsx
- TableS5.xls
