# Supplementary material for: ATAC-Seq Identifies Chromatin Landscapes Linked to the Regulation of Oxidative Stress in the Human Fungal Pathogen Candida albicans
Source: J Fungi (Basel). 2020 Sep 21;6(3):182. doi: 10.3390/jof6030182 (PMC7559329; doi:10.3390/jof6030182)
Supplement: Supplementary file 1 [file jof-06-00182-s001.zip › TableS2.xlsx]

## Sheet: legend
Table S2. K-means clustering result and transcriptional regulation of associated genes
geneID	gene id of the next gene downstream of the peak; from C. albicans assembly 22 (A22-s07-m01-r88)
Cluster	cluster from K-means clustering analysis displayed in Figure 2C-D
GeneName	gene name annotation from C. albicans assembly 22 (A22-s07-m01-r88)
EntrezID	gene id from the Entrez database
RNAseq_logFC	log2 fold change in transcript abundance in H2O2 vs YPD grown cells
RNAseq_FDR	false discovery rate RNA-seq

## Sheet: result
geneID	Cluster	GeneName	EntrezID	RNAseq_logFC	RNAseq_FDR
C1_04500W_A	cluster_1	ICL1	3646146	8.234	0
C4_06900W_A	cluster_1	GST1	3642909	8.003	0
C1_10310W_A	cluster_1	NA	3634906	7.913	0
C6_01180C_A	cluster_1	EBP1	3644060	7.654	0
C4_06780C_A	cluster_1	OYE32	3642919	6.997	0
C7_00350C_A	cluster_1	NA	3638039	6.896	0
C4_06890W_A	cluster_1	ARR3	3642910	6.887	0
C1_05840W_A	cluster_1	PRN1	3639882	6.682	0
C2_05060C_A	cluster_1	NA	3643451	6.556	0
C6_01070C_A	cluster_1	CIP1	3644018	6.46	0
C6_02100W_A	cluster_1	NA	3647554	6.456	0
C2_07280W_A	cluster_1	NA	3643475	6.358	0
C4_02990C_A	cluster_1	GST2	3637937	6.344	0
C1_08790W_A	cluster_1	TPO3	3634790	6.343	0
C7_00770W_A	cluster_1	NA	3637959	6.34	0
C1_11700C_A	cluster_1	MRF1	3645321	6.243	0
C6_01510W_A	cluster_1	OYE23	3641618	6.076	0
C2_06720W_A	cluster_1	GRE2	3648026	5.967	0
C2_08290C_A	cluster_1	UCF1	3648170	5.932	0
C2_08290C_A	cluster_1	UCF1	3648170	5.932	0
CR_03710C_A	cluster_1	NA	3643224	5.512	0
C2_00250W_A	cluster_1	STF2	30515083	5.492	0
C1_09690W_A	cluster_1	MLS1	3634875	5.477	0
C4_01350W_A	cluster_1	NA	NA	5.476	0
C6_00850W_A	cluster_1	NA	3644010	5.368	0
C2_08200W_A	cluster_1	NA	3648342	5.332	0
C1_06810W_A	cluster_1	CAT1	3639495	5.18	0
C2_07570W_A	cluster_1	RNR22	3645217	5.175	0
C6_02480W_A	cluster_1	NA	3639170	5.158	0
C5_02710W_A	cluster_1	TRR1	3637778	4.95	0
C4_03430W_A	cluster_1	MOH1	3646809	4.81	0
C3_02610C_A	cluster_1	GLX3	3638325	4.645	0
C1_11850W_A	cluster_1	NA	3642010	4.613	0
C3_02480C_A	cluster_1	CCP1	3638350	4.462	0
C1_00490C_A	cluster_1	TTR1	3639313	4.333	0
C3_06180C_A	cluster_1	TSA1	3642269	4.16	0
C6_04210C_A	cluster_1	ATM1	3646284	4.141	0
C6_01870C_A	cluster_1	NA	3641625	4.098	0
C1_07180W_A	cluster_1	CCS1	3644476	4.055	0
C5_01520C_A	cluster_1	GLR1	3647061	3.992	0
C3_03720W_A	cluster_1	GTT11	3645644	3.949	0
C7_01430C_A	cluster_1	NA	3636961	3.891	0
C1_12060C_A	cluster_1	NA	3642026	3.879	0
C1_02810W_A	cluster_1	RAD16	3636874	3.871	0
C3_04480C_A	cluster_1	RAS2	3635211	3.785	0
C2_02920W_A	cluster_1	NA	3643016	3.721	0
C1_03820W_A	cluster_1	PDR16	3644679	3.702	0
C1_01990W_A	cluster_1	HSP30	3645419	3.695	0
C3_06330W_A	cluster_1	TSA1B	30515214	3.67	0
C1_07980C_A	cluster_1	NA	3640696	3.663	0
C2_05070W_A	cluster_1	FRE9	3643452	3.663	0
C2_03110W_A	cluster_1	NA	3642995	3.571	0
C1_11580W_A	cluster_1	NA	3645330	3.543	0
C4_02340W_A	cluster_1	NA	3637883	3.528	0
C5_02860C_A	cluster_1	GRP2	3637744	3.525	0
C1_10280C_A	cluster_1	NA	3634902	3.509	0
C5_05190W_A	cluster_1	PCL5	3636466	3.502	0
C4_03890W_A	cluster_1	PTP2	3647858	3.491	0
C1_05160C_A	cluster_1	NA	3642468	3.383	0
CR_10350C_A	cluster_1	TRX1	3638950	3.363	0
C3_07340W_A	cluster_1	GCY1	3638477	3.315	0
C2_07630C_A	cluster_1	NA	3645193	3.284	0
C1_02040C_A	cluster_1	NA	3644586	3.256	0
C3_00940W_A	cluster_1	NA	3639851	3.196	0
CR_02650C_A	cluster_1	DRE2	3642571	3.181	0
C2_03320W_A	cluster_1	CHK1	3637394	3.145	0
C4_02410C_A	cluster_1	AHP1	3637850	3.143	0
C1_09250W_A	cluster_1	CRP1	3634826	3.119	0
C7_01700W_A	cluster_1	NA	3637013	3.112	0
C1_10360C_A	cluster_1	NA	3634836	3.045	0
C7_00760C_A	cluster_1	NA	3637960	3.029	0
C1_13450W_A	cluster_1	HYR1	3636226	3.018	0
C3_05570W_A	cluster_1	QDR2	3643661	2.984	0
C2_09990C_A	cluster_1	YOR1	3643964	2.963	0
C1_08980C_A	cluster_1	ZWF1	3634913	2.95	0
CR_01730W_A	cluster_1	IFU5	3640116	2.899	0
C1_07230W_A	cluster_1	PHO15	3644459	2.887	0
C1_09150W_A	cluster_1	AOX2	3634945	2.887	0
C1_12910W_A	cluster_1	NA	30515066	2.87	0
C2_07640W_A	cluster_1	NA	3645192	2.867	0
C1_08070W_A	cluster_1	CDR4	3640711	2.822	0
CR_03260W_A	cluster_1	NA	30515389	2.821	0
C3_02220W_A	cluster_1	CAP1	3636640	2.791	0
C1_04330W_A	cluster_1	RPN4	3644684	2.747	0
C2_03310C_A	cluster_1	VPS20	3637427	2.736	0
C5_03510C_A	cluster_1	NA	3646969	2.721	0
C1_10060C_A	cluster_1	NA	3634812	2.659	0
C4_04050C_A	cluster_1	RHD3	3641212	2.633	0
C3_03230C_A	cluster_1	NA	3638316	2.597	0
C1_06610C_A	cluster_1	HAK1	3639546	2.568	0
C3_05930W_A	cluster_1	CTA4	3641743	2.551	0
C1_12080W_A	cluster_1	LCB4	3642057	2.542	0
C1_05140W_A	cluster_1	BRG1	3647664	2.498	0
C1_03520W_A	cluster_1	RPN3	3636917	2.469	0
CR_10250C_A	cluster_1	FDH3	3638923	2.469	0
C1_01520C_A	cluster_1	SOD2	3640231	2.393	0
CR_02990C_A	cluster_1	RIB1	3642607	2.327	0
C1_03380W_A	cluster_1	TPS2	3636892	2.293	0
CR_05380C_A	cluster_1	YCP4	3648032	2.293	0
C1_07990C_A	cluster_1	NA	3640697	2.291	0
C5_00390C_A	cluster_1	NA	3641552	2.282	0
C7_03220C_A	cluster_1	ZCF29	3641370	2.279	0
C7_03220C_A	cluster_1	ZCF29	3641370	2.279	0
CR_03720W_A	cluster_1	TAL1	3643225	2.276	0
C6_03700W_A	cluster_1	ALS1	3640280	2.266	0
C4_01760W_A	cluster_1	NA	3635584	2.259	0
C1_02700C_A	cluster_1	NA	30514972	2.251	0
C1_12360C_A	cluster_1	RIB3	3642062	2.107	0
C4_05400C_A	cluster_1	NA	3646952	2.106	0
C1_07240W_A	cluster_1	YPD1	3644458	2.042	0
C1_12460C_A	cluster_1	NA	NA	2.013	0
C1_12460C_A	cluster_1	NA	NA	2.013	0
C1_01140C_A	cluster_1	NA	3640202	1.995	0
CR_06650C_A	cluster_1	NA	3646620	1.993	0
C2_10070W_A	cluster_1	NA	3643946	1.958	0
C7_02330W_A	cluster_1	YCF1	3636934	1.945	0
C4_06880C_A	cluster_1	NA	30515287	1.942	0
C7_03240W_A	cluster_1	NA	3641368	1.941	0
C6_00800C_A	cluster_1	NA	3647069	1.916	0
CR_02350C_A	cluster_1	GEF2	3644935	1.914	0
CR_03000C_A	cluster_1	NA	3642597	1.9	0
C1_08350C_A	cluster_1	NA	30515030	1.886	0
C4_02520C_A	cluster_1	NA	3637863	1.885	0
C1_11660W_A	cluster_1	GAD1	3645339	1.88	0
C4_02320C_A	cluster_1	SOD1	30515248	1.869	0
CR_05390W_A	cluster_1	PST3	3648031	1.834	0
C1_08340C_A	cluster_1	NA	3640752	1.803	0
C1_11670W_A	cluster_1	NA	3645338	1.757	0
C1_08610C_A	cluster_1	NA	3646512	1.746	0
C1_06660W_A	cluster_1	NA	3639542	1.743	0
C1_09240C_A	cluster_1	NA	3634901	1.728	0
C2_09010W_A	cluster_1	STB3	3645781	1.723	0
C1_10040W_A	cluster_1	ERO1	3634810	1.703	0
C2_01700C_A	cluster_1	HAP42	3635729	1.696	0
CR_03730C_A	cluster_1	NA	3643226	1.686	0
C6_02540C_A	cluster_1	NA	3639176	1.657	0
CR_02880W_A	cluster_1	NA	3642584	1.639	0
C3_07280C_A	cluster_1	NA	3638431	1.638	0
C6_02560W_A	cluster_1	NA	3639205	1.638	0
C1_05540C_A	cluster_1	NA	3642503	1.636	0
CR_09780C_A	cluster_1	IFA14	3639012	1.618	0
C1_04480C_A	cluster_1	TUS1	3646144	1.58	0
C1_12370W_A	cluster_1	NA	3642061	1.563	0
C2_10060C_A	cluster_1	NA	3643948	1.554	0
CR_10260W_A	cluster_1	NA	3638932	1.554	0
CR_00980C_A	cluster_1	CAB3	3640426	1.517	0
C7_01800C_A	cluster_1	PFK2	3637056	1.501	0
C2_00240C_A	cluster_1	SOD6	3638899	1.499	0
C1_05880W_A	cluster_1	PRN4	3639877	1.493	0
C6_01370W_A	cluster_1	NA	3641607	1.484	0
C4_05590W_A	cluster_1	NA	3641776	1.413	0
C7_01690W_A	cluster_1	NA	3636980	1.383	0
C7_01920W_A	cluster_1	CDC34	3637028	1.372	0
C1_08320W_A	cluster_1	TKL1	3640767	1.37	0
C5_02520W_A	cluster_1	NA	3637768	1.303	0
C3_00480C_A	cluster_1	DOT5	3640519	1.302	0
C6_03820C_A	cluster_1	NA	3640288	1.292	0
C6_03830W_A	cluster_1	SAL6	3640289	1.223	0
C2_07660W_A	cluster_1	PDS5	3642341	1.182	0
CR_00780C_A	cluster_1	GSY1	3640435	1.166	0
C1_08950W_A	cluster_1	PFK26	3634912	1.146	0
C3_06620W_A	cluster_1	FUN31	3642249	1.127	0
CR_04510W_A	cluster_1	HXK2	3641015	1.127	0
C1_10180C_A	cluster_1	ECM21	3634784	1.104	0
C3_03870C_A	cluster_1	SAP9	3645625	1.1	0
C4_06790W_A	cluster_1	NA	3642918	1.069	0
C1_05560W_A	cluster_1	RIB4	30514995	1.039	0
C1_05560W_A	cluster_1	RIB4	30514995	1.039	0
C3_03880C_A	cluster_1	PEP8	3645624	1.034	0
C3_07440W_A	cluster_1	TPI1	3638482	1.027	0.007
C1_10800C_A	cluster_1	ALP1	3644437	1.005	0
C7_03250C_A	cluster_1	PDI1	3641367	0.98	0
C4_06740C_A	cluster_1	NA	3642923	0.978	0
C6_03370W_A	cluster_1	NA	3639230	0.952	0.003
C5_04370C_A	cluster_1	PGA37	3636484	0.933	0.069
CR_03250C_A	cluster_1	NA	3645102	0.933	0.008
C1_10840C_A	cluster_1	NA	3644452	0.927	0
C4_01380W_A	cluster_1	ZCF27	3635631	0.916	0.003
C3_00550C_A	cluster_1	HRK1	3640586	0.912	0
C5_00570W_A	cluster_1	NA	3641589	0.905	0
C1_01550W_A	cluster_1	VPS17	3640218	0.889	0.009
C1_06850W_A	cluster_1	PCL7	3639491	0.88	0
C4_01750C_A	cluster_1	FBA1	3635585	0.854	0.016
C4_02000C_A	cluster_1	RGA2	3635661	0.849	0.001
C1_08800W_A	cluster_1	NA	3634791	0.844	0
C6_00330C_A	cluster_1	GNP1	3646073	0.838	0.001
CR_07530C_A	cluster_1	ECM22	3648000	0.815	0
C4_06760W_A	cluster_1	GUT2	3642921	0.803	0.001
C3_00490W_A	cluster_1	ESA1	3640518	0.797	0
C3_00360W_A	cluster_1	NA	3640542	0.796	0.053
C4_02420C_A	cluster_1	NA	3637849	0.796	0.001
C6_00750C_A	cluster_1	PGK1	3647081	0.796	0.027
C1_04950C_A	cluster_1	RPM2	3644790	0.778	0.006
C3_00320W_A	cluster_1	RHR2	3640522	0.765	0.111
C3_00850C_A	cluster_1	NA	3647748	0.716	0.065
CR_08200C_A	cluster_1	NA	3642087	0.716	0.018
C5_02720W_A	cluster_1	PEP12	3637737	0.691	0.008
C3_03410C_A	cluster_1	NA	3638353	0.667	0.016
C1_12260W_A	cluster_1	VPH2	3642021	0.664	0.012
C6_03710W_A	cluster_1	ALS9	3640281	0.664	0.032
C1_06840C_A	cluster_1	NA	30515012	0.656	0.022
C3_01940C_A	cluster_1	NA	3636600	0.645	0.003
C2_01000W_A	cluster_1	HGT7	3638876	0.644	0.065
C3_00690C_A	cluster_1	SWD1	3640535	0.626	0.004
C3_06880W_A	cluster_1	NA	3638539	0.622	0.322
CR_06340C_A	cluster_1	PGI1	3644847	0.603	0.053
C5_05050W_A	cluster_1	ADH1	3636489	0.594	0.277
C2_03270W_A	cluster_1	GPM1	3637431	0.585	0.071
C5_02810W_A	cluster_1	NA	30515304	0.584	0.028
C1_13850C_A	cluster_1	DAL7	3636130	0.564	0.428
C3_06870W_A	cluster_1	TDH3	3638540	0.501	0.13
C1_10810W_A	cluster_1	NA	3644436	0.446	0.183
C6_00290W_A	cluster_1	NA	3646069	0.445	0.076
C2_10560C_A	cluster_1	ZSF1	3641257	0.428	0.156
CR_04520W_A	cluster_1	MIM1	30515394	0.42	0.1
C6_00760W_A	cluster_1	NA	3647080	0.418	0.075
C1_05850W_A	cluster_1	POL32	3639881	0.375	0.086
CR_07770C_A	cluster_1	PTC6	3647351	0.369	0.107
C5_01230C_A	cluster_1	NA	3642618	0.368	0.148
C1_02840W_A	cluster_1	PDE2	3636877	0.362	0.199
C3_03420C_A	cluster_1	NDE1	3638354	0.336	0.198
C2_05050C_A	cluster_1	NA	3643450	0.323	0.138
C3_04060C_A	cluster_1	HEM13	3647390	0.313	0.304
C3_00880W_A	cluster_1	KGD1	3647752	0.31	0.275
C1_03390W_A	cluster_1	EHT1	3636894	0.29	0.209
CR_05350W_A	cluster_1	NA	30515405	0.283	0.722
C7_00340C_A	cluster_1	NA	3638040	0.277	0.307
C1_11590W_A	cluster_1	PLD1	3645329	0.227	0.427
C6_01900C_A	cluster_1	DOG1	3641597	0.223	0.35
C1_04490W_A	cluster_1	NA	3646145	0.207	0.494
C7_01440W_A	cluster_1	NA	3636960	0.205	0.499
CR_07450C_A	cluster_1	MNL1	3646050	0.194	0.569
C2_00970C_A	cluster_1	UBP13	3638879	0.189	0.427
C3_04090W_A	cluster_1	SBP1	3635280	0.185	0.505
C4_02530W_A	cluster_1	ARG83	3637862	0.145	0.691
C6_01880W_A	cluster_1	NA	3641599	0.119	0.664
C1_11560C_A	cluster_1	NA	3645331	0.099	0.717
C6_02010C_A	cluster_1	GPD2	3644563	0.097	0.757
C6_03360C_A	cluster_1	NA	3639203	0.086	1
C6_00280W_A	cluster_1	CPH2	3646067	0.082	0.735
CR_06040W_A	cluster_1	NA	3644836	0.079	0.766
C6_02060W_A	cluster_1	SLM2	3647559	0.074	0.776
C3_04110C_A	cluster_1	MBP1	3635281	0.043	0.871
C2_03540W_A	cluster_1	RAD32	3637340	0.005	0.986
C2_03530W_A	cluster_1	NA	3637341	0	0.992
C2_09880C_A	cluster_1	NA	3643779	-0.002	1
C1_10220C_A	cluster_1	TPK1	3634879	-0.004	0.984
C6_03180C_A	cluster_1	NA	3639261	-0.038	0.925
C3_05680W_A	cluster_1	NA	3641724	-0.096	0.728
C3_05700W_A	cluster_1	CHS4	3641726	-0.155	0.529
C2_09460C_A	cluster_1	RHA1	3647713	-0.235	0.349
C7_01810W_A	cluster_1	RVB2	3637055	-0.237	0.343
C2_08870C_A	cluster_1	PIR1	3645801	-0.244	0.423
CR_03910C_A	cluster_1	TAF12L	3640954	-0.257	0.35
C1_00510W_A	cluster_1	NA	3639311	-0.301	0.208
C5_03020W_A	cluster_1	CCC2	3637821	-0.333	0.237
C5_01240W_A	cluster_1	AUR1	3642617	-0.364	0.188
CR_03700C_A	cluster_1	NA	3643223	-0.389	0.113
C1_13250W_A	cluster_1	NA	3636143	-0.446	0.095
CR_00790C_A	cluster_1	NA	NA	-0.527	0.424
C1_09140C_A	cluster_1	SSU81	3634944	-0.539	0.016
CR_02560C_A	cluster_1	ASG1	3647687	-0.565	0.071
C2_10240W_A	cluster_1	GPD1	3643924	-0.574	0.064
C1_12450C_A	cluster_1	IRA2	3642011	-0.593	0.025
C1_04290C_A	cluster_1	ACS2	3644710	-0.696	0.008
C3_05910W_A	cluster_1	ZCF35	3641740	-0.8	0
C4_01730C_A	cluster_1	NA	3635588	-0.823	0.001
C5_00670C_A	cluster_1	HMS1	3641570	-0.864	0.043
C4_01300W_A	cluster_1	NA	3635605	-0.89	0.005
C4_03930C_A	cluster_1	NA	30515262	-0.953	0
C1_04510W_A	cluster_1	NA	3646147	-0.992	0
C1_00480C_A	cluster_1	GCN20	3639314	-1.006	0
CR_05730C_A	cluster_1	NA	3646698	-1.059	0
C2_07910C_A	cluster_1	NA	30515146	-1.143	0
C4_01360W_A	cluster_1	PGA53	3635599	-1.162	0
C1_04760C_A	cluster_1	SYG1	3644777	-1.176	0
C6_01910W_A	cluster_1	ADK1	3644533	-1.187	0
C1_07160C_A	cluster_1	NA	30515020	-1.192	0.007
C5_00680W_A	cluster_1	RMT2	3641569	-1.242	0
C4_00960W_A	cluster_1	PTC8	3635674	-1.263	0.001
CR_09850C_A	cluster_1	FGR46	3638989	-1.343	0.002
C1_10010C_A	cluster_1	SWE1	3634866	-1.372	0
C1_02710W_A	cluster_1	FRS2	3636824	-1.393	0
CR_07240C_A	cluster_1	CLG1	3646030	-1.462	0
C2_07290W_A	cluster_1	NA	3643476	-1.477	0
C4_01520C_A	cluster_1	RPL20B	3635615	-1.61	0
C1_09700W_A	cluster_1	NA	3634876	-1.617	0.021
C7_00710W_A	cluster_1	RPS28B	30515349	-1.661	0
C1_13130C_A	cluster_1	NA	3636202	-1.702	0
C7_01510W_A	cluster_1	NA	3637049	-1.758	0
C4_03420C_A	cluster_1	NA	NA	-1.8	0
C2_09000C_A	cluster_1	NA	3645782	-1.862	0
C7_01790C_A	cluster_1	RPL5	3637057	-1.885	0
C1_11860W_A	cluster_1	NA	3642009	-1.915	0
C6_01520W_A	cluster_1	NA	3641617	-1.925	0
C1_13330C_A	cluster_1	NA	3636150	-2.012	0
C3_02470C_A	cluster_1	RPL9B	3638348	-2.024	0
C2_08310W_A	cluster_1	TIM22	3648168	-2.034	0
C1_08000W_A	cluster_1	NRP1	3640698	-2.216	0
C1_13140C_A	cluster_1	TYE7	3636203	-2.267	0
CR_07810W_A	cluster_1	YHB5	3647343	-2.503	0
C1_06820W_A	cluster_1	NA	3639493	-2.581	0
C7_00360W_A	cluster_1	DFI1	3638038	-2.595	0
C1_13150W_A	cluster_1	NA	NA	-2.853	0
C3_00330W_A	cluster_1	UTP8	3640547	-2.912	0
C6_03200W_A	cluster_1	NA	3639177	-2.958	0
C3_01560W_A	cluster_1	NA	3636669	-3.066	0
C2_09890W_A	cluster_1	SMM1	3643778	-3.319	0
CR_06660W_A	cluster_1	SEO1	3646621	-4.129	0
C4_01800W_A	cluster_2	NA	3635595	7.475	0
C2_00760C_A	cluster_2	NA	3638910	6.848	0
C4_05560C_A	cluster_2	ARO9	3641773	6.4	0
C2_07070W_A	cluster_2	NA	3643501	6.288	0
C6_01410C_A	cluster_2	OYE2	3641603	6.119	0
C2_10180W_A	cluster_2	IFR1	3643930	6.046	0
C2_02070W_A	cluster_2	SPR3	3635853	5.855	0
C2_06890C_A	cluster_2	NA	3643522	5.73	0
CR_07740W_A	cluster_2	NA	30515430	5.65	0
CR_01200W_A	cluster_2	OYE22	3640408	5.512	0
CR_04820W_A	cluster_2	NA	3647298	5.385	0
CR_10100C_A	cluster_2	INO1	3638966	5.385	0
C5_05180W_A	cluster_2	NA	3636465	5.107	0
C1_03990W_A	cluster_2	NA	3646424	5.089	0
C2_03750W_A	cluster_2	YIM1	3637372	4.991	0
CR_04960C_A	cluster_2	CRG1	3646393	4.944	0
CR_06460W_A	cluster_2	GST3	3645278	4.658	0
C1_10740C_A	cluster_2	ASR1	3644402	4.632	0
C2_10000C_A	cluster_2	NA	30515163	4.593	0
C7_01150W_A	cluster_2	NA	3645913	4.555	0
CR_00090C_A	cluster_2	NA	3639734	4.46	0
C7_03350C_A	cluster_2	NA	3646722	4.43	0
C7_02010C_A	cluster_2	NA	3636954	4.412	0
C1_14190C_A	cluster_2	NA	3643300	4.328	0
C7_03780C_A	cluster_2	NA	3643119	4.297	0
C2_02550C_A	cluster_2	NA	3635856	4.237	0
CR_07160C_A	cluster_2	NA	3648347	4.192	0
C4_06710W_A	cluster_2	NA	3642948	4.144	0
C3_01130C_A	cluster_2	NA	3639901	4.141	0
C1_13430C_A	cluster_2	NA	3636223	4.12	0
C2_03390C_A	cluster_2	HSP78	3637414	4.071	0
C1_03270W_A	cluster_2	NA	3636900	4.02	0
C1_11530C_A	cluster_2	NA	3645334	4.002	0
C1_05700W_A	cluster_2	AUT7	30514999	3.958	0
C5_03490C_A	cluster_2	NA	3646967	3.9	0
C7_03450C_A	cluster_2	HSM3	3646713	3.877	0
C4_02330C_A	cluster_2	NA	3637884	3.861	0
C4_00640W_A	cluster_2	NA	3645767	3.855	0
C5_04470C_A	cluster_2	NA	3636414	3.826	0
C2_08420W_A	cluster_2	NA	3643897	3.804	0
C2_09480W_A	cluster_2	NA	3643819	3.793	0
C1_12070C_A	cluster_2	NA	3642025	3.778	0
C7_03580C_A	cluster_2	NA	3646238	3.755	0
C2_07580W_A	cluster_2	NA	3645216	3.721	0
C2_00770W_A	cluster_2	NA	3638909	3.709	0
C1_05870W_A	cluster_2	PRN3	3639878	3.68	0
C1_03510C_A	cluster_2	NA	3636916	3.641	0
CR_05340C_A	cluster_2	IFE2	3648027	3.621	0
C1_09010W_A	cluster_2	NAR1	3634916	3.58	0
C4_01330W_A	cluster_2	NA	NA	3.574	0
CR_03120W_A	cluster_2	NA	3645123	3.533	0
CR_07150W_A	cluster_2	GLK1	3648348	3.529	0
C6_03930W_A	cluster_2	OPT8	3640266	3.511	0
C1_11270W_A	cluster_2	NA	3644555	3.507	0
C1_05690C_A	cluster_2	NA	3639896	3.499	0
CR_03280W_A	cluster_2	IFR2	3645100	3.49	0
C6_02210W_A	cluster_2	NA	3645864	3.466	0
C3_04310C_A	cluster_2	NA	3635145	3.432	0
C1_02980W_A	cluster_2	GOR1	3636836	3.415	0
C2_03790C_A	cluster_2	ASR3	3637402	3.374	0
C3_04920C_A	cluster_2	NA	3635268	3.364	0
CR_03010C_A	cluster_2	ERV1	30515385	3.342	0
C1_14030W_A	cluster_2	NA	3643340	3.314	0
C3_04170W_A	cluster_2	NA	3635182	3.31	0
C4_00450C_A	cluster_2	PGA10	3645009	3.297	0
C1_01220C_A	cluster_2	NA	3640210	3.294	0
C5_02380W_A	cluster_2	NA	3637794	3.289	0
C1_14000C_A	cluster_2	DOA4	3643337	3.283	0
C2_01180W_A	cluster_2	COX17	30515088	3.271	0
C3_04330C_A	cluster_2	NA	3635272	3.238	0
C2_06940C_A	cluster_2	ARE2	3643526	3.233	0
C2_03620W_A	cluster_2	IFK2	3637439	3.211	0
CR_10230W_A	cluster_2	NA	3638921	3.206	0
C7_01760C_A	cluster_2	ISU1	3637007	3.177	0
C1_12240C_A	cluster_2	NA	3642023	3.138	0
CR_07490C_A	cluster_2	GLK4	3646046	3.122	0
C4_06980W_A	cluster_2	PRA1	3642969	3.121	0
C2_01880C_A	cluster_2	ZCF6	3635837	3.12	0
CR_00610W_A	cluster_2	IFF4	3639694	3.113	0
C1_11570W_A	cluster_2	NA	30515055	3.065	0
C4_05170C_A	cluster_2	NBP35	NA	3.038	0
C3_07380W_A	cluster_2	NA	3638473	3.032	0
CR_03220C_A	cluster_2	NA	3645128	3.017	0
C6_04220C_A	cluster_2	HBR2	NA	3.01	0
C1_01340C_A	cluster_2	NA	3640189	2.969	0
C1_02910C_A	cluster_2	NA	3636829	2.963	0
C1_10700C_A	cluster_2	NIT3	3644408	2.957	0
C6_03050C_A	cluster_2	NA	3639270	2.951	0
C1_09380W_A	cluster_2	RIM20	3634809	2.937	0
C2_10600W_A	cluster_2	NA	3641245	2.922	0
C2_09710C_A	cluster_2	NA	3643786	2.896	0
CR_08270W_A	cluster_2	NA	3642101	2.891	0
CR_03300C_A	cluster_2	NA	3645098	2.881	0
C3_04800C_A	cluster_2	NA	3635216	2.87	0
C5_03240W_A	cluster_2	BUB3	3646362	2.869	0
C6_01360W_A	cluster_2	NA	3641608	2.862	0
C1_01830C_A	cluster_2	UBC8	3645433	2.851	0
CR_02060W_A	cluster_2	NA	3640155	2.825	0
C2_06880C_A	cluster_2	PRB1	3643521	2.823	0
C1_01540W_A	cluster_2	NA	3640233	2.817	0
C1_06780W_A	cluster_2	NPR1	3639498	2.813	0
C2_02950W_A	cluster_2	BNA31	3643012	2.806	0
C4_00850C_A	cluster_2	NA	3635718	2.789	0
C6_04600W_A	cluster_2	DAC1	3645967	2.786	0
C2_00540W_A	cluster_2	NA	3638865	2.767	0
C1_08940C_A	cluster_2	MSN4	3634911	2.766	0
C1_09660W_A	cluster_2	DOA1	3634871	2.748	0
C3_07330W_A	cluster_2	NA	3638478	2.74	0
C1_03140W_A	cluster_2	NA	3636929	2.738	0
C2_08130W_A	cluster_2	ARA1	3642331	2.73	0
C4_00150C_A	cluster_2	PEX5	3645026	2.725	0
C4_05300W_A	cluster_2	XKS1	3648306	2.718	0
C4_04450C_A	cluster_2	ATG1	3641175	2.707	0
CR_03620C_A	cluster_2	NA	3643182	2.696	0
C6_03320W_A	cluster_2	NA	3639198	2.685	0
C2_06550W_A	cluster_2	NA	3646559	2.683	0
C3_07260C_A	cluster_2	ECM29	3638433	2.672	0
C1_05860W_A	cluster_2	PRN2	3639879	2.669	0
C2_07270W_A	cluster_2	NA	3643474	2.653	0
CR_09750C_A	cluster_2	NA	3639009	2.649	0
C1_05510C_A	cluster_2	RPS27A	30514993	2.644	0
CR_06870C_A	cluster_2	NA	3647318	2.643	0
C1_06110C_A	cluster_2	NPL4	3639820	2.641	0
C7_03860W_A	cluster_2	NA	3643144	2.622	0
C1_09300C_A	cluster_2	NA	3634831	2.619	0
C5_01420W_A	cluster_2	NA	3647055	2.604	0
C3_04870W_A	cluster_2	NA	3635226	2.599	0
C3_06900W_A	cluster_2	ISA2	3638513	2.586	0
C6_02030C_A	cluster_2	NA	3647562	2.58	0
C4_00350W_A	cluster_2	PEP7	3645001	2.578	0
C1_11150W_A	cluster_2	NA	3648356	2.576	0
C1_08170C_A	cluster_2	BUL1	3640734	2.573	0
C2_07440C_A	cluster_2	NA	3645200	2.57	0
C2_01840C_A	cluster_2	RAD7	3635833	2.556	0
C2_08930W_A	cluster_2	NA	3645795	2.556	0
C4_02920W_A	cluster_2	NA	3637878	2.556	0
C7_01040C_A	cluster_2	NA	3638018	2.548	0
C7_03030W_A	cluster_2	NA	3641380	2.528	0
CR_04350C_A	cluster_2	NA	3641001	2.524	0
CR_00270C_A	cluster_2	NA	3639720	2.518	0
C1_09770W_A	cluster_2	NA	3634825	2.501	0
C7_02450W_A	cluster_2	NA	3636972	2.475	0
C2_00340C_A	cluster_2	ARO8	3638828	2.447	0
C7_03020C_A	cluster_2	DUG3	3641381	2.443	0
CR_02130W_A	cluster_2	ECM4	3640144	2.439	0
C2_04020C_A	cluster_2	SDS22	3637362	2.436	0
C5_00690C_A	cluster_2	TFB3	3644115	2.431	0
C2_01870C_A	cluster_2	NA	3635836	2.43	0
C5_02220C_A	cluster_2	NA	3637760	2.43	0
C2_09750W_A	cluster_2	LEU42	3643808	2.424	0
C4_01170C_A	cluster_2	BMT9	3635654	2.412	0
C2_04460W_A	cluster_2	LYS22	3645466	2.403	0
C4_04660C_A	cluster_2	NA	3641150	2.402	0
C1_05330C_A	cluster_2	NA	3642485	2.401	0
C1_12140W_A	cluster_2	NA	3642050	2.391	0
C1_06520C_A	cluster_2	BPH1	3639547	2.387	0
C2_00960C_A	cluster_2	MXR1	3638881	2.381	0
C2_06780C_A	cluster_2	NA	3643516	2.365	0
C2_06150C_A	cluster_2	RPN10	3644080	2.362	0
CR_04060C_A	cluster_2	DAP1	3641021	2.352	0
C2_00260C_A	cluster_2	MUQ1	3638898	2.344	0
C4_02860W_A	cluster_2	NA	3637909	2.317	0
C5_02030W_A	cluster_2	RPN8	3643770	2.317	0
C4_07250C_A	cluster_2	TLO10	3642943	2.316	0
C2_07400C_A	cluster_2	2001-04-01	3645204	2.314	0
C3_05560W_A	cluster_2	PRE3	3643660	2.309	0
CR_05170C_A	cluster_2	FDH1	3646398	2.307	0
C2_06710W_A	cluster_2	NA	3648020	2.305	0
C1_14490C_A	cluster_2	SAM35	3643329	2.29	0
C1_14490C_A	cluster_2	SAM35	3643329	2.29	0
C2_00600C_A	cluster_2	NA	3638850	2.283	0
C1_07880C_A	cluster_2	GCS1	3640742	2.271	0
C6_00700C_A	cluster_2	NA	3647074	2.265	0.001
C3_00310C_A	cluster_2	NA	3640523	2.262	0
C2_04720C_A	cluster_2	FGR51	3647796	2.261	0
C2_07140W_A	cluster_2	NA	3643508	2.261	0
CR_01790C_A	cluster_2	NA	3640161	2.258	0
C2_09590C_A	cluster_2	NA	3643800	2.249	0
C1_09740C_A	cluster_2	NA	30515035	2.244	0
C2_09670C_A	cluster_2	NA	3643792	2.236	0
C1_08540C_A	cluster_2	NA	3646497	2.234	0
C5_04520W_A	cluster_2	TIP41	3636506	2.228	0
C6_03540W_A	cluster_2	NA	3640244	2.224	0
C5_04360C_A	cluster_2	NA	3636483	2.212	0
C2_03060W_A	cluster_2	PR26	3642981	2.203	0
C1_04060W_A	cluster_2	IFI3	3644694	2.201	0
C2_04940C_A	cluster_2	ITR1	3643440	2.194	0
C5_00010W_A	cluster_2	TLO11	3647880	2.188	0
C5_05310W_A	cluster_2	PRE1	3636500	2.187	0
C7_02170C_A	cluster_2	NA	3636993	2.185	0
C2_10750C_A	cluster_2	AKL1	3641237	2.178	0
C3_02570W_A	cluster_2	NA	3638375	2.178	0
CR_08890C_A	cluster_2	ASR2	3641907	2.168	0.001
C6_04470C_A	cluster_2	NA	3645985	2.158	0
C2_03460C_A	cluster_2	NA	3637348	2.157	0
C1_00500C_A	cluster_2	GLO1	3639312	2.139	0.004
C2_00270C_A	cluster_2	NA	3638803	2.136	0
C5_02690W_A	cluster_2	NA	3637775	2.136	0
C3_00770C_A	cluster_2	SCL1	3640510	2.134	0
C5_02230W_A	cluster_2	NA	3637708	2.128	0
C1_03300C_A	cluster_2	MAS1	3636855	2.127	0
C4_03910W_A	cluster_2	FGR28	3648315	2.126	0
C5_02930C_A	cluster_2	GRE3	3637811	2.124	0
CR_05750W_A	cluster_2	NA	3646696	2.117	0
CR_09100C_A	cluster_2	NA	3641928	2.117	0
C1_04320W_A	cluster_2	GPM2	3644713	2.116	0
C2_08640C_A	cluster_2	PST2	3643909	2.116	0
C3_06690C_A	cluster_2	NA	3642256	2.115	0
C1_01190C_A	cluster_2	NA	3640207	2.113	0
C1_12700W_A	cluster_2	NA	3646831	2.113	0
C2_00280C_A	cluster_2	NA	3638802	2.107	0
C4_04180C_A	cluster_2	NA	3641183	2.104	0
C6_02020C_A	cluster_2	NA	3647563	2.103	0
CR_04480C_A	cluster_2	LAP3	3641012	2.092	0
CR_09930W_A	cluster_2	NA	3639029	2.092	0
C2_03590C_A	cluster_2	CAP4	3637335	2.09	0
C4_01130C_A	cluster_2	NA	3635682	2.088	0
CR_01900C_A	cluster_2	HNM3	3640093	2.079	0
C5_02870C_A	cluster_2	NA	NA	2.075	0
C6_03620C_A	cluster_2	NA	3640297	2.066	0
C2_00740C_A	cluster_2	NA	3638912	2.061	0
C1_08530W_A	cluster_2	NA	3646496	2.06	0
C3_00290W_A	cluster_2	RPT2	3640525	2.05	0
C3_03460C_A	cluster_2	NA	3638359	2.05	0
C2_10580W_A	cluster_2	UBC15	3641260	2.047	0
C7_01050W_A	cluster_2	NA	3638017	2.044	0
C2_00390C_A	cluster_2	NA	3638822	2.036	0
C4_03370C_A	cluster_2	NA	3646796	2.032	0
C1_02800W_A	cluster_2	NA	3636873	2.031	0
C3_01950C_A	cluster_2	NA	3636599	2.03	0
C7_00030W_A	cluster_2	NA	3638004	2.03	0
CR_06030C_A	cluster_2	NA	3644874	2.025	0
C5_01880C_A	cluster_2	NA	3643751	2.024	0
CR_03290C_A	cluster_2	IME2	3645099	2.023	0
C2_07260C_A	cluster_2	DQD1	3643488	2.014	0
C7_04020C_A	cluster_2	PRE5	3643111	2.014	0
C1_08430W_A	cluster_2	CAF16	3646486	2.01	0
C1_10340W_A	cluster_2	NA	3634909	1.991	0
C1_07480C_A	cluster_2	NA	3646667	1.988	0
C1_09160W_A	cluster_2	AOX1	3634946	1.986	0
C6_01740C_A	cluster_2	ATG15	3641641	1.983	0
C2_05180W_A	cluster_2	WH11	30515117	1.976	0.024
CR_01470W_A	cluster_2	CSP37	3640098	1.976	0
C5_04190W_A	cluster_2	MRV2	3636545	1.974	0
C4_07050W_A	cluster_2	YDC1	3642962	1.965	0
C7_01230C_A	cluster_2	NA	3645906	1.954	0
C6_00880W_A	cluster_2	PEX7	3644027	1.946	0
CR_08350W_A	cluster_2	NA	3642082	1.946	0
C6_01960W_A	cluster_2	NA	3644559	1.941	0
C7_03870W_A	cluster_2	RAD6	3643143	1.941	0
C2_08010W_A	cluster_2	BLM3	3642310	1.93	0
CR_09670C_A	cluster_2	NA	3647091	1.928	0
C1_13190W_A	cluster_2	NA	3636163	1.923	0
C3_04340W_A	cluster_2	ATF1	3635273	1.916	0
C4_04710W_A	cluster_2	GYP1	3641138	1.916	0
C2_03170W_A	cluster_2	NA	3642988	1.91	0
C6_02710C_A	cluster_2	SAP6	3639229	1.907	0
C2_08780W_A	cluster_2	RPT6	3643877	1.905	0
C2_05650W_A	cluster_2	VPS35	3645567	1.902	0
CR_04630C_A	cluster_2	DIT2	3640962	1.895	0
CR_03230W_A	cluster_2	NA	3645127	1.891	0
C2_02980C_A	cluster_2	DLD1	3643025	1.89	0
C4_05890W_A	cluster_2	NA	3641795	1.89	0
C3_02920W_A	cluster_2	NA	3638379	1.886	0
C4_02470C_A	cluster_2	NA	3637869	1.882	0
C1_06670W_A	cluster_2	NA	3639541	1.88	0
C2_08620W_A	cluster_2	NA	3643912	1.878	0
C4_03200C_A	cluster_2	NA	3637837	1.875	0
C6_00300C_A	cluster_2	STV1	3646070	1.875	0
C6_03670C_A	cluster_2	NA	NA	1.875	0
C4_04080C_A	cluster_2	PGA31	3641226	1.873	0
C1_09190C_A	cluster_2	DAK2	3634895	1.872	0
C7_02460C_A	cluster_2	NA	3636946	1.861	0
C5_04420W_A	cluster_2	NA	3636411	1.86	0
C3_07350W_A	cluster_2	NA	3638476	1.857	0
C6_04400W_A	cluster_2	NA	3645949	1.856	0
C7_02320W_A	cluster_2	SEC1	3636935	1.85	0
C4_05920C_A	cluster_2	PGA49	3646525	1.843	0
C5_03620W_A	cluster_2	BTS1	3646982	1.838	0
C1_09210C_A	cluster_2	NA	3634897	1.837	0
C4_06390W_A	cluster_2	SOU1	3642799	1.836	0
C1_06180W_A	cluster_2	TLO34	3648392	1.83	0
C4_02360W_A	cluster_2	AMS1	3637882	1.83	0
C2_05690C_A	cluster_2	YTH1	3645572	1.825	0
C7_01650W_A	cluster_2	NA	3636984	1.824	0
C3_02060W_A	cluster_2	NA	3636578	1.812	0
C3_04740C_A	cluster_2	NA	3635251	1.806	0
C1_06120C_A	cluster_2	NA	3639850	1.794	0
C2_05700W_A	cluster_2	OSM1	3645573	1.794	0
C2_06820C_A	cluster_2	PRE2	3643490	1.791	0
C7_01780W_A	cluster_2	LPI9	3637060	1.787	0
CR_09460C_A	cluster_2	NA	30515453	1.782	0
CR_09460C_A	cluster_2	NA	30515453	1.782	0
C5_00580W_A	cluster_2	NA	3641588	1.775	0
C2_09490W_A	cluster_2	PHO13	3643818	1.774	0
C6_02790C_A	cluster_2	NA	3639245	1.77	0
C2_01320W_A	cluster_2	NA	3638846	1.763	0
CR_09990W_A	cluster_2	NA	3638930	1.759	0
C1_13270W_A	cluster_2	NA	3636144	1.755	0
C2_06430C_A	cluster_2	NA	3646558	1.755	0
C3_02390W_A	cluster_2	NA	3636615	1.745	0
C4_00060W_A	cluster_2	NA	3648061	1.744	0
C6_02860W_A	cluster_2	STE23	3639236	1.734	0
CR_05740C_A	cluster_2	PTC4	3646697	1.732	0
C6_03280W_A	cluster_2	NA	3639185	1.731	0.001
CR_03740C_A	cluster_2	NA	3643176	1.728	0
CR_09420C_A	cluster_2	BGL22	3641935	1.717	0
C1_03980W_A	cluster_2	SPC19	3646423	1.706	0
CR_00150C_A	cluster_2	POT1	3639707	1.701	0
C2_08830W_A	cluster_2	NA	3643894	1.7	0
C6_03300C_A	cluster_2	NA	3639196	1.695	0
C2_00700W_A	cluster_2	NA	3638884	1.694	0
C1_03330C_A	cluster_2	NA	3636859	1.691	0
C4_02040W_A	cluster_2	NA	3635649	1.69	0
CR_05450C_A	cluster_2	NA	3648236	1.69	0
C1_09670C_A	cluster_2	NA	3634872	1.688	0
C6_00180C_A	cluster_2	NA	3646081	1.678	0
C2_07490W_A	cluster_2	HEM15	3645211	1.676	0
CR_05440W_A	cluster_2	NA	3648245	1.674	0
C3_06270C_A	cluster_2	NA	3642239	1.673	0
C6_00320C_A	cluster_2	DNA2	3646072	1.671	0
CR_08300C_A	cluster_2	NA	3642076	1.664	0
C3_06610W_A	cluster_2	NA	3642248	1.661	0
C1_13260W_A	cluster_2	NA	30515074	1.657	0
C1_02630C_A	cluster_2	EXG2	3636816	1.656	0
CR_03920C_A	cluster_2	TPO4	3640956	1.655	0
C1_13580W_A	cluster_2	SEC18	3636208	1.65	0
C3_00400C_A	cluster_2	NA	3640554	1.647	0
C6_04410C_A	cluster_2	NA	3645950	1.641	0
C5_03860W_A	cluster_2	HAM1	3647224	1.636	0
C1_05170C_A	cluster_2	CUE5	3642467	1.631	0
C1_03750W_A	cluster_2	NA	3644690	1.627	0
C3_02900W_A	cluster_2	NA	3638337	1.627	0
C3_06320W_A	cluster_2	ALS7	3642234	1.625	0
C1_10230C_A	cluster_2	NA	3634880	1.624	0
C4_02690W_A	cluster_2	NA	3637861	1.623	0
C1_01200W_A	cluster_2	STB5	3640208	1.622	0
C6_00730W_A	cluster_2	NA	3647070	1.622	0
C5_00470C_A	cluster_2	KRE62	3641543	1.617	0
C4_00680W_A	cluster_2	NA	3645753	1.608	0
C1_00650C_A	cluster_2	SNF7	3639377	1.607	0
C2_08820C_A	cluster_2	SPO11	3643873	1.604	0
C1_00420W_A	cluster_2	NA	3639286	1.598	0
C1_10790W_A	cluster_2	CDC48	3644440	1.59	0
C2_05810W_A	cluster_2	NA	3647481	1.582	0
C1_07260C_A	cluster_2	NA	3644456	1.58	0
C3_07430W_A	cluster_2	NA	3638484	1.575	0
C3_06230W_A	cluster_2	CYM1	3642244	1.572	0
CR_00020W_A	cluster_2	TLO1	3639677	1.572	0.006
C6_00920W_A	cluster_2	NA	3644031	1.567	0
C1_01290C_A	cluster_2	NA	3640184	1.563	0
C3_02580C_A	cluster_2	NA	3638376	1.561	0
C2_00480C_A	cluster_2	PHHB	3638871	1.556	0
C2_00780W_A	cluster_2	POT1-2	3638908	1.556	0
C1_04430C_A	cluster_2	NA	30514986	1.547	0
CR_09340W_A	cluster_2	NA	3641900	1.543	0
C2_07220W_A	cluster_2	NA	3643483	1.531	0
C3_04420W_A	cluster_2	NA	3635180	1.529	0
C1_14470W_A	cluster_2	NA	3643327	1.526	0
C7_03290C_A	cluster_2	RBR3	3646728	1.525	0
C1_05480C_A	cluster_2	NA	3642486	1.509	0
C6_03310W_A	cluster_2	NA	3639197	1.505	0
C6_02520W_A	cluster_2	ISA1	3639174	1.5	0
C6_03630W_A	cluster_2	PAD1	3640298	1.489	0
C2_03630W_A	cluster_2	NA	3637438	1.488	0.009
C4_06060W_A	cluster_2	VPS13	3646528	1.485	0
C2_09820W_A	cluster_2	NA	3643801	1.483	0
C2_09470C_A	cluster_2	PMS1	3647714	1.482	0
C1_09780C_A	cluster_2	NA	3634842	1.48	0
C2_08750W_A	cluster_2	NA	3643881	1.48	0
C2_01660C_A	cluster_2	NA	3635742	1.476	0
C4_00840W_A	cluster_2	NA	3635722	1.468	0
CR_09960C_A	cluster_2	UGA3	3638926	1.461	0
C1_09650W_A	cluster_2	NA	3634870	1.459	0
C1_10460W_A	cluster_2	NA	3647183	1.458	0
C5_04920C_A	cluster_2	NA	3636419	1.452	0
C2_07430C_A	cluster_2	NA	3645201	1.451	0
C1_10410W_A	cluster_2	NA	3634840	1.45	0
C2_01910W_A	cluster_2	NA	3635790	1.447	0
C2_00350W_A	cluster_2	NA	3638827	1.445	0
C3_03270W_A	cluster_2	NA	3638321	1.442	0
C2_02500W_A	cluster_2	NA	3635816	1.441	0.001
C2_04850C_A	cluster_2	NA	3648114	1.437	0
C2_01650W_A	cluster_2	NA	3635741	1.431	0
C3_03400C_A	cluster_2	VTI1	3638352	1.429	0
C2_10440C_A	cluster_2	RAD1	3641192	1.424	0
C1_04800C_A	cluster_2	NA	3644789	1.42	0.018
C2_01190C_A	cluster_2	NA	3638859	1.417	0
CR_09210W_A	cluster_2	SUC1	3641916	1.414	0
C1_06970C_A	cluster_2	NA	3639567	1.41	0
CR_04490C_A	cluster_2	NA	3641013	1.406	0
C1_03150C_A	cluster_2	NA	30514976	1.405	0
C2_04410W_A	cluster_2	NA	3645455	1.405	0
C1_02880C_A	cluster_2	MIA40	3636866	1.404	0
C4_01950W_A	cluster_2	NA	3635665	1.393	0
CR_05720W_A	cluster_2	TPS1	3646699	1.387	0
C2_01250W_A	cluster_2	NA	3638793	1.386	0
C1_14180W_A	cluster_2	NA	3643324	1.384	0
C1_04460C_A	cluster_2	NA	3646140	1.382	0
C2_05360C_A	cluster_2	BIO32	3643430	1.377	0
C2_00460W_A	cluster_2	SAP30	3638813	1.376	0
CR_00600C_A	cluster_2	NA	3639660	1.372	0
C2_01310W_A	cluster_2	NA	3638788	1.37	0
C7_04330C_A	cluster_2	SYS1	3643138	1.367	0
C6_01280W_A	cluster_2	EXO84	3644022	1.365	0
C5_03590W_A	cluster_2	LAP4	3646979	1.364	0
C1_07220W_A	cluster_2	NA	3644460	1.357	0
C6_02300C_A	cluster_2	NA	3645874	1.352	0
C2_05950C_A	cluster_2	TES15	3647478	1.349	0
C2_10050W_A	cluster_2	NA	3643949	1.347	0
CR_10200W_A	cluster_2	NA	3638919	1.345	0
C1_05200C_A	cluster_2	NA	3642466	1.342	0
C2_03680W_A	cluster_2	SAP98	3637435	1.34	0
C2_10330C_A	cluster_2	NA	3643943	1.336	0
CR_05490W_A	cluster_2	SUA72	3648239	1.336	0
C1_14580C_A	cluster_2	NA	3643290	1.33	0
C1_11200W_A	cluster_2	NA	3644396	1.329	0
C4_05440C_A	cluster_2	NA	3646960	1.329	0
C6_00120W_A	cluster_2	NA	30515323	1.329	0
C2_03500W_A	cluster_2	NA	3637345	1.328	0
C2_08120W_A	cluster_2	MAF1	3642332	1.328	0
C2_10700C_A	cluster_2	NA	3641207	1.327	0
C2_03600W_A	cluster_2	BMT8	3637442	1.325	0
C1_03470C_A	cluster_2	NA	3636912	1.324	0.022
C3_06210C_A	cluster_2	MUB1	3642246	1.324	0
C1_11920W_A	cluster_2	NA	3642003	1.319	0
C6_02730W_A	cluster_2	SAC6	3639213	1.317	0
C5_03500W_A	cluster_2	GAP6	3646968	1.316	0
C2_08660C_A	cluster_2	NA	3643907	1.313	0
C2_10530C_A	cluster_2	KIN3	3641199	1.312	0
C6_01010W_A	cluster_2	KAR5	3644049	1.312	0.001
C2_06570C_A	cluster_2	NA	3646561	1.31	0.001
C6_02320C_A	cluster_2	IPL1	3645876	1.31	0
C4_02300W_A	cluster_2	HOS3	3637886	1.305	0
C1_00530C_A	cluster_2	NA	3639368	1.301	0
C3_03680W_A	cluster_2	NA	3645648	1.301	0
C5_04480C_A	cluster_2	NA	30515317	1.301	0.063
C5_04560C_A	cluster_2	CUP1	30515318	1.301	0.002
C2_08950W_A	cluster_2	NA	3645788	1.299	0
C5_04810W_A	cluster_2	PFK1	3636448	1.299	0
C7_00390W_A	cluster_2	SPL1	3638035	1.299	0
C1_14430C_A	cluster_2	NA	3643297	1.298	0.001
CR_02570C_A	cluster_2	NA	3647685	1.298	0
C6_03020W_A	cluster_2	PEP3	3639267	1.297	0
C6_02610C_A	cluster_2	CDC37	3639210	1.294	0
C3_06850W_A	cluster_2	FCR1	3638542	1.291	0
C2_02750C_A	cluster_2	NA	3643033	1.283	0
C3_06170C_A	cluster_2	NA	3642272	1.279	0.094
C6_02920C_A	cluster_2	VPS51	3639242	1.277	0
C7_00790W_A	cluster_2	NA	3637943	1.276	0
C5_02200W_A	cluster_2	NA	3637758	1.275	0
C4_01020C_A	cluster_2	NA	3635606	1.272	0
C2_04450W_A	cluster_2	NA	3645467	1.271	0
C4_02600C_A	cluster_2	NA	3637912	1.271	0
C2_03260W_A	cluster_2	NA	3637432	1.269	0
C7_03970C_A	cluster_2	NA	3643117	1.263	0
C4_06770W_A	cluster_2	NA	3642920	1.261	0
C2_08940C_A	cluster_2	VPS28	3645794	1.259	0
C1_02780W_A	cluster_2	NA	3636871	1.255	0
CR_02100C_A	cluster_2	NA	3640141	1.252	0
C4_03280W_A	cluster_2	MSN5	3637889	1.251	0
C3_05410W_A	cluster_2	NA	3643665	1.25	0
C3_06430W_A	cluster_2	APN1	3642263	1.248	0
CR_04890W_A	cluster_2	LYS5	3647308	1.243	0.01
CR_09310W_A	cluster_2	NA	3641923	1.242	0
C3_01700W_A	cluster_2	CDC53	3636603	1.238	0
C1_01930W_A	cluster_2	NA	30514966	1.237	0
C5_03940C_A	cluster_2	NA	3647446	1.237	0
C2_09220W_A	cluster_2	DDR48	3644061	1.236	0
CR_10360C_A	cluster_2	CTM1	3638951	1.235	0
C1_03320C_A	cluster_2	EHD3	3636858	1.23	0
C7_01940C_A	cluster_2	NA	3636971	1.227	0
C6_01770W_A	cluster_2	RAD18	3641637	1.224	0
C5_02140C_A	cluster_2	NA	3637752	1.223	0
C6_01100W_A	cluster_2	SEC9	3644052	1.219	0
C1_10550C_A	cluster_2	GCA2	3647194	1.218	0
C2_00380C_A	cluster_2	RFA1	3638823	1.218	0
C2_00550W_A	cluster_2	NA	3638855	1.218	0
C2_04560W_A	cluster_2	KTR2	3645443	1.216	0
C1_02440C_A	cluster_2	NA	3636848	1.211	0
C6_02930W_A	cluster_2	NA	3639243	1.209	0
C1_14310W_A	cluster_2	NA	3643315	1.207	0
C2_02380W_A	cluster_2	POB3	3635827	1.205	0
C4_07200C_A	cluster_2	NA	3642958	1.205	0
CR_02510W_A	cluster_2	NA	3647694	1.204	0
C6_03520C_A	cluster_2	NA	3640259	1.202	0
C1_01900C_A	cluster_2	NA	3645426	1.2	0
C1_14250C_A	cluster_2	NA	3643307	1.2	0
C2_05780C_A	cluster_2	MKK2	3645580	1.195	0
C5_02020C_A	cluster_2	NA	3643771	1.195	0
C1_12690C_A	cluster_2	NA	3646832	1.189	0.002
C2_05720C_A	cluster_2	NA	3645574	1.189	0
CR_09720W_A	cluster_2	VMA22	3647086	1.189	0.001
C3_06920W_A	cluster_2	NA	3638511	1.188	0
C4_05090C_A	cluster_2	SRB8	3641128	1.188	0
C4_00600C_A	cluster_2	MUC1	3645771	1.187	0
C4_03550W_A	cluster_2	RAD2	3645374	1.187	0
C7_01070C_A	cluster_2	NA	3637949	1.182	0
C7_00370W_A	cluster_2	DCC1	3638037	1.177	0
CR_03210C_A	cluster_2	SSU72	3645129	1.177	0
C1_05260C_A	cluster_2	SDH1	3642477	1.176	0
C6_03270C_A	cluster_2	AYR2	3639184	1.174	0
C3_00540C_A	cluster_2	IST1	3640587	1.173	0
CR_05560W_A	cluster_2	NA	3647592	1.173	0
C3_03130C_A	cluster_2	NA	3638421	1.172	0.003
C3_03490W_A	cluster_2	RSN1	3638308	1.171	0.037
C7_00930W_A	cluster_2	GPH1	3637956	1.166	0
C4_05160C_A	cluster_2	NA	3647411	1.164	0
C4_05140C_A	cluster_2	GDB1	3647409	1.163	0
C6_01480W_A	cluster_2	NA	3641621	1.163	0.001
C7_02210W_A	cluster_2	NA	3636990	1.163	0.014
C1_08730W_A	cluster_2	NA	3634938	1.16	0
C5_01890W_A	cluster_2	NA	3643750	1.16	0
C1_00320W_A	cluster_2	NA	3639297	1.158	0
C2_05210W_A	cluster_2	DAD2	3643465	1.156	0
CR_01830C_A	cluster_2	PTR2	3640089	1.155	0.05
C1_04380W_A	cluster_2	SIT4	3647993	1.153	0
C2_05660W_A	cluster_2	PNG2	3645568	1.144	0
C5_05360C_A	cluster_2	NA	3636402	1.144	0
C5_04680W_A	cluster_2	PSD2	3636515	1.143	0
C7_00420C_A	cluster_2	NA	3638032	1.141	0
C1_07830C_A	cluster_2	NA	3640736	1.14	0
C1_01060W_A	cluster_2	MBF1	3640171	1.133	0
C6_00460C_A	cluster_2	FET3	3647153	1.124	0
CR_07700W_A	cluster_2	NA	3648195	1.124	0
C1_04450C_A	cluster_2	FMA1	3647986	1.121	0
CR_03130W_A	cluster_2	NA	3645121	1.121	0
C4_00280W_A	cluster_2	STE24	3645040	1.113	0
C2_02360C_A	cluster_2	NA	3635824	1.111	0
C2_08710W_A	cluster_2	PEX17	3643886	1.108	0.001
C4_06340W_A	cluster_2	AGO1	3642828	1.106	0
C1_14040W_A	cluster_2	APL1	3643342	1.102	0
C7_02420C_A	cluster_2	NA	3636975	1.099	0.008
C2_04400W_A	cluster_2	NA	3645457	1.098	0
C2_07210C_A	cluster_2	TPK2	3643482	1.098	0
C3_00520W_A	cluster_2	NA	3640513	1.096	0
C6_02570C_A	cluster_2	SEC20	3639206	1.094	0
CR_00700W_A	cluster_2	NA	3640442	1.093	0
C1_02670C_A	cluster_2	MNN43	3636821	1.083	0.002
C2_05770W_A	cluster_2	NA	3645579	1.083	0.001
C1_00660C_A	cluster_2	NA	3639376	1.081	0
CR_10340W_A	cluster_2	PTP3	3638940	1.08	0
CR_03520C_A	cluster_2	NA	3643203	1.074	0
C7_00380W_A	cluster_2	NA	3638036	1.073	0
C2_05390C_A	cluster_2	NA	3643434	1.072	0.072
CR_10670W_A	cluster_2	CPR6	3639020	1.072	0
C7_04040C_A	cluster_2	NPT1	3643109	1.071	0
C2_00330C_A	cluster_2	HIR1	3638796	1.07	0
C3_07090W_A	cluster_2	HHT1	3638444	1.065	0
C1_10330C_A	cluster_2	NA	3634908	1.063	0
C2_08770C_A	cluster_2	NA	3643878	1.057	0
CR_00470W_A	cluster_2	NA	3639725	1.056	0
C2_01600C_A	cluster_2	CDC55	3635785	1.054	0
C1_05100W_A	cluster_2	NA	3647669	1.052	0
C1_12410C_A	cluster_2	PKH2	3642058	1.052	0
C3_01220W_A	cluster_2	NA	3636610	1.052	0.008
C3_04260W_A	cluster_2	NA	3635140	1.042	0
C4_02560C_A	cluster_2	UME7	3637918	1.032	0.006
CR_02390W_A	cluster_2	NA	3644930	1.032	0
C6_02040W_A	cluster_2	MCR1	3647561	1.029	0
CR_05420W_A	cluster_2	NA	NA	1.029	0.062
C3_07310C_A	cluster_2	SLK19	3638466	1.025	0.003
CR_06000W_A	cluster_2	SOK1	3642495	1.023	0
C1_13690C_A	cluster_2	NA	30515076	1.021	0
C5_05300W_A	cluster_2	RIB5	3636499	1.02	0
C7_02860C_A	cluster_2	NA	3641397	1.019	0
C4_06110C_A	cluster_2	TRP5	3648087	1.016	0
C3_04880W_A	cluster_2	PIN3	3635228	1.012	0
CR_01180W_A	cluster_2	NA	3640427	1.011	0.001
C1_14550C_A	cluster_2	NA	3643334	1.007	0
C5_02700W_A	cluster_2	CTA7	3637776	1.005	0
C2_01110C_A	cluster_2	BCY1	3638832	1.004	0
C2_03140C_A	cluster_2	NA	3642992	1.001	0
C2_08240W_A	cluster_2	ORF298	3642344	1.001	0
CR_10330W_A	cluster_2	PGA11	3638939	0.999	0.022
C7_02220C_A	cluster_2	NA	3636989	0.997	0.003
C3_07610W_A	cluster_2	TIP120	3638494	0.994	0
C5_04060C_A	cluster_2	MEC1	3647733	0.991	0
C3_06600C_A	cluster_2	NA	3642280	0.99	0
C7_02750W_A	cluster_2	FGR6-1	NA	0.986	0.001
C2_10690W_A	cluster_2	TPS3	3641205	0.981	0
C4_06740C_A	cluster_2	NA	3642923	0.978	0
C5_03770C_A	cluster_2	NA	3647233	0.976	0.107
C4_05320W_A	cluster_2	LYS1	6335429	0.974	0.001
C5_05200C_A	cluster_2	NA	3636467	0.974	0
C6_02110W_A	cluster_2	NA	3647553	0.974	0
C3_02450W_A	cluster_2	HRT1	30515187	0.972	0
C1_03600W_A	cluster_2	NA	3636880	0.969	0
C4_02720C_A	cluster_2	NA	3637857	0.967	0
C1_07250C_A	cluster_2	ALG9	3644457	0.965	0
C5_01980C_A	cluster_2	NA	3643775	0.965	0
CR_06700C_A	cluster_2	SOL3	3646625	0.963	0
C1_00970W_A	cluster_2	NA	30514958	0.96	0.001
CR_00540C_A	cluster_2	MDH1	3639667	0.96	0.001
C3_03810W_A	cluster_2	RAD53	3645633	0.954	0
C5_03450W_A	cluster_2	NA	30515311	0.95	0.12
C1_14200W_A	cluster_2	NA	3643301	0.949	0
C4_05540W_A	cluster_2	HOM3	3641771	0.948	0.001
C7_04050W_A	cluster_2	HLJ1	3643158	0.947	0
C4_01890C_A	cluster_2	ARL1	3635637	0.946	0
C1_11790W_A	cluster_2	NA	3645326	0.943	0
C3_06280W_A	cluster_2	NA	3642238	0.935	0
C1_02970W_A	cluster_2	NA	3636835	0.934	0
C1_03130C_A	cluster_2	GGA2	3636928	0.934	0
C2_04110W_A	cluster_2	NA	3637378	0.934	0
C3_03830W_A	cluster_2	NA	3645630	0.929	0
C4_06360C_A	cluster_2	NA	3642825	0.929	0.12
C7_02090C_A	cluster_2	NA	3637024	0.927	0
CR_05460W_A	cluster_2	NA	3648237	0.924	0
C4_04630C_A	cluster_2	NA	3641154	0.922	0.001
C2_09770C_A	cluster_2	INP51	3643806	0.921	0
CR_05920C_A	cluster_2	MHP1	3642460	0.915	0
C2_06220C_A	cluster_2	MEC3	3646910	0.91	0
C2_06220C_A	cluster_2	MEC3	3646910	0.91	0
C5_05440C_A	cluster_2	NA	3636431	0.909	0.039
C2_02490C_A	cluster_2	NA	3635815	0.908	0
C2_03900C_A	cluster_2	NA	3637395	0.908	0
C4_01240C_A	cluster_2	NA	3635705	0.906	0.001
C7_04270C_A	cluster_2	UFE1	3643174	0.901	0
C4_06040W_A	cluster_2	NA	3646521	0.888	0.016
C5_03080C_A	cluster_2	NA	3637701	0.887	0
C1_08460C_A	cluster_2	UPC2	3646489	0.886	0
C2_10470C_A	cluster_2	NA	3641196	0.885	0
C4_01510W_A	cluster_2	NA	3635616	0.885	0
C4_03940C_A	cluster_2	PYC2	3637323	0.881	0.006
C2_09600C_A	cluster_2	NA	3643799	0.879	0.032
C5_00740W_A	cluster_2	CTF8	3644120	0.876	0.001
C5_02900W_A	cluster_2	NA	3637747	0.872	0.013
C1_14170W_A	cluster_2	NA	3643323	0.87	0
C2_05150W_A	cluster_2	PEX2	3643460	0.865	0
CR_02460W_A	cluster_2	NA	3644922	0.863	0
C1_11330C_A	cluster_2	SMT3	3644550	0.862	0.01
C1_11330C_A	cluster_2	SMT3	3644550	0.862	0.01
C2_01900C_A	cluster_2	NA	3635789	0.862	0
C1_01750W_A	cluster_2	NA	3645413	0.856	0
C1_07380C_A	cluster_2	KSP1	3644467	0.854	0.001
C5_02560C_A	cluster_2	NA	3637719	0.85	0.001
C2_10480W_A	cluster_2	MDH1-3	3641197	0.849	0
C7_00310C_A	cluster_2	NA	3638045	0.848	0.001
C5_02790C_A	cluster_2	GAP1	3637806	0.841	0.001
CR_07780W_A	cluster_2	NA	3647352	0.841	0
C1_11690W_A	cluster_2	NA	3645322	0.84	0.005
CR_00530W_A	cluster_2	NA	3639668	0.833	0.145
C3_04410C_A	cluster_2	NA	3635178	0.832	0
C4_03390W_A	cluster_2	CSH3	3646798	0.829	0
C5_04980W_A	cluster_2	NA	3636536	0.829	0.009
C1_00430W_A	cluster_2	NA	3639285	0.82	0.001
C1_11280W_A	cluster_2	NA	3644554	0.82	0.001
C3_03510C_A	cluster_2	NA	3638310	0.82	0.001
CR_10520C_A	cluster_2	SLD5	3639041	0.816	0.001
C2_08700C_A	cluster_2	NA	3643887	0.815	0.009
C7_02140W_A	cluster_2	NA	3636996	0.815	0.014
C4_06940C_A	cluster_2	NA	3642928	0.811	0
C2_03350W_A	cluster_2	PGA17	3637391	0.808	0.121
C3_01210C_A	cluster_2	NA	3636612	0.798	0
C4_01900C_A	cluster_2	MDH1-1	3635636	0.795	0.005
C5_03680W_A	cluster_2	FGR27	3646988	0.792	0.001
C2_05590C_A	cluster_2	NA	3645564	0.789	0
C7_03200C_A	cluster_2	NA	3641342	0.787	0.009
CR_09270C_A	cluster_2	CBP1	3641920	0.784	0.001
C5_05210W_A	cluster_2	NA	3636468	0.777	0
C1_06200W_A	cluster_2	NA	3648300	0.776	0
C2_06560W_A	cluster_2	NA	30515139	0.773	0.188
CR_08700C_A	cluster_2	ARF1	3642130	0.773	0.005
C1_00370W_A	cluster_2	NA	30514954	0.772	0.003
C3_06470W_A	cluster_2	AAF1	3642284	0.768	0.026
C6_02780C_A	cluster_2	MIF2	3639220	0.767	0
C7_03260C_A	cluster_2	NA	3641366	0.766	0.004
C7_03260C_A	cluster_2	NA	3641366	0.766	0.004
C1_12160W_A	cluster_2	MSO1	3642040	0.764	0.023
C2_00920W_A	cluster_2	NA	3638893	0.763	0.003
C5_04410C_A	cluster_2	NA	3636410	0.761	0.008
C1_14210C_A	cluster_2	IML2	3643302	0.76	0.001
C3_03760W_A	cluster_2	NA	3645638	0.76	0.002
C6_02800W_A	cluster_2	NA	3639246	0.758	0
C3_02590W_A	cluster_2	APL5	3638377	0.755	0.001
C7_03980W_A	cluster_2	NA	3643116	0.755	0.001
C3_01460C_A	cluster_2	FOX3	3636629	0.737	0.093
C6_03430C_A	cluster_2	NA	3640273	0.736	0.003
C3_02430W_A	cluster_2	APL2	3638343	0.735	0.01
C5_04100W_A	cluster_2	CDS1	3647729	0.732	0.005
C2_08790W_A	cluster_2	JEM1	3643876	0.729	0.002
C3_07360W_A	cluster_2	DLD2	3638475	0.726	0.006
CR_07840C_A	cluster_2	NA	3647346	0.725	0.118
C4_05830W_A	cluster_2	NA	3641787	0.724	0.037
CR_05960W_A	cluster_2	NA	30515417	0.721	0.007
C7_02070W_A	cluster_2	GRX1	3637026	0.719	0.13
CR_06470W_A	cluster_2	NA	3645277	0.719	0.155
CR_10580W_A	cluster_2	PRO1	3639000	0.716	0.004
C1_04980C_A	cluster_2	NA	3647529	0.709	0.003
C4_02310W_A	cluster_2	BEM3	3637885	0.709	0.013
C1_12640W_A	cluster_2	NA	3646837	0.708	0.059
C6_00890W_A	cluster_2	NA	3644028	0.705	0.001
C7_02520W_A	cluster_2	NA	3636941	0.705	0.035
C1_12830C_A	cluster_2	NA	3636176	0.704	0.01
C4_00020W_A	cluster_2	VMA6	3648053	0.702	0.031
C6_00500C_A	cluster_2	NA	3647149	0.695	0.011
C1_02820W_A	cluster_2	LYS2	3636875	0.694	0.015
C1_03530W_A	cluster_2	MED17	3636918	0.694	0.001
C2_06610C_A	cluster_2	NA	30515140	0.693	0.003
C2_06610C_A	cluster_2	NA	30515140	0.693	0.003
C4_06250C_A	cluster_2	SEC3	3642806	0.692	0.005
C3_04020C_A	cluster_2	ZCF16	3647395	0.691	0.003
C3_00830C_A	cluster_2	NA	3647757	0.688	0.005
C1_07840W_A	cluster_2	NA	3640737	0.686	0.006
C1_14230C_A	cluster_2	IRR1	3643305	0.68	0.002
C5_01460W_A	cluster_2	YBL053	3647045	0.676	0.001
C3_05550C_A	cluster_2	NA	3643659	0.671	0.007
C7_00750W_A	cluster_2	ACB1	30515350	0.671	0.12
CR_09200C_A	cluster_2	UGA33	3641886	0.671	0.005
C1_07940W_A	cluster_2	NA	30515027	0.668	0.319
C2_02030W_A	cluster_2	ARO3	3635770	0.662	0.014
C7_00020C_A	cluster_2	RVS161	3638005	0.661	0.037
CR_02070C_A	cluster_2	ADH5	3640156	0.66	0.182
CR_00370W_A	cluster_2	NA	3639684	0.658	0.001
C1_10290W_A	cluster_2	GCA1	3634903	0.656	0.047
C3_04100W_A	cluster_2	NA	30515201	0.656	0.119
C7_02080W_A	cluster_2	NA	3637025	0.651	0.061
C2_01550W_A	cluster_2	SMP2	3635779	0.649	0.006
C6_02950C_A	cluster_2	NA	3639188	0.649	0.228
C1_07630W_A	cluster_2	NA	3646660	0.648	0.014
C5_03780C_A	cluster_2	NA	3647232	0.648	0.022
C7_02850W_A	cluster_2	NA	3641399	0.648	0.001
C1_04010C_A	cluster_2	NA	3646426	0.646	0.036
C5_01790C_A	cluster_2	NA	NA	0.645	0.142
C5_01790C_A	cluster_2	NA	NA	0.645	0.142
C1_02030C_A	cluster_2	NA	3645415	0.639	0.022
C7_01960W_A	cluster_2	NA	3636969	0.637	0.029
CR_00260W_A	cluster_2	KIN2	3639697	0.636	0.009
C7_02570C_A	cluster_2	RBP1	3647647	0.635	0.02
C2_09170W_A	cluster_2	SLP2	3644091	0.631	0.013
C3_06820C_A	cluster_2	TAF12	3638544	0.629	0.111
C1_03500W_A	cluster_2	YPT1	3636915	0.627	0.016
CR_01400W_A	cluster_2	LYS12	3640134	0.627	0.012
C4_00180W_A	cluster_2	ECM7	3645029	0.626	0.008
C3_01190C_A	cluster_2	NA	3647961	0.621	0.003
CR_09330C_A	cluster_2	NA	3641899	0.619	0.013
C1_01630W_A	cluster_2	NA	3640194	0.606	0.003
C2_02890W_A	cluster_2	SCT2	3643018	0.602	0.004
C4_06930C_A	cluster_2	EXM2	3642929	0.59	0.018
C5_01490C_A	cluster_2	NA	3647058	0.59	0.008
C1_02920W_A	cluster_2	CDC73	3636830	0.589	0.007
C1_13120C_A	cluster_2	MON2	3636201	0.587	0.017
C5_02810W_A	cluster_2	NA	30515304	0.584	0.028
CR_07570W_A	cluster_2	NA	3648004	0.583	0.01
C3_06640W_A	cluster_2	NA	3642251	0.582	0.052
C1_08040W_A	cluster_2	NA	30515028	0.581	0.114
C6_02940C_A	cluster_2	NA	3639187	0.579	0.009
C6_00170C_A	cluster_2	NA	3647903	0.578	0.18
C2_03300W_A	cluster_2	HEM2	3637428	0.576	0.011
C2_06460W_A	cluster_2	RTA3	3646566	0.572	0.016
C4_00170W_A	cluster_2	NA	3645028	0.569	0.031
C7_01170C_A	cluster_2	NA	3645914	0.567	0.23
C3_00780W_A	cluster_2	HOS2	3640509	0.566	0.014
C2_08860W_A	cluster_2	NA	3645776	0.563	0.013
C6_03340C_A	cluster_2	GLC3	3639200	0.559	0.015
C4_01830C_A	cluster_2	NA	3635593	0.558	0.007
C1_10270C_A	cluster_2	SFH5	3634884	0.557	0.01
C6_00570C_A	cluster_2	NHX1	3647141	0.555	0.01
C1_10570C_A	cluster_2	NA	3648377	0.553	0.243
C4_02680C_A	cluster_2	NA	3637828	0.552	0.071
C1_13530W_A	cluster_2	NA	NA	0.551	0.021
C3_07630C_A	cluster_2	NA	3638491	0.547	0.069
C2_06600W_A	cluster_2	NA	3646563	0.545	0.057
C4_03510C_A	cluster_2	HWP2	3646803	0.543	0.456
C5_02750C_A	cluster_2	NA	3637740	0.541	0.009
C2_07060W_A	cluster_2	NA	3643500	0.539	0.033
C2_08100W_A	cluster_2	NA	3642334	0.539	0.023
C4_05970W_A	cluster_2	NA	3646514	0.538	0.013
C4_03660W_A	cluster_2	tD(GUC)2	30515261	0.536	0.54
C2_07460W_A	cluster_2	TAF4	3645198	0.526	0.016
CR_01340W_A	cluster_2	NA	3640165	0.524	0.321
C2_02250C_A	cluster_2	OPI1	3635777	0.522	0.049
C4_00240C_A	cluster_2	PRO3	3645036	0.521	0.019
C4_02820W_A	cluster_2	NA	3637896	0.521	0.211
C3_07640C_A	cluster_2	FUM12	3638489	0.517	0.069
C4_01850C_A	cluster_2	PDC12	3635591	0.516	0.219
CR_04720C_A	cluster_2	NA	3648140	0.515	0.034
C4_04570W_A	cluster_2	RCE1	3641104	0.514	0.015
C7_00910C_A	cluster_2	NA	3637958	0.514	0.098
C3_01440C_A	cluster_2	NA	3636632	0.511	0.16
C1_00230C_A	cluster_2	BFA1	3639301	0.51	0.079
C1_01320W_A	cluster_2	MRS7	3640187	0.51	0.069
C4_03380C_A	cluster_2	DAO2	3646797	0.51	0.032
C7_01710W_A	cluster_2	NA	3637012	0.51	0.085
C4_01110W_A	cluster_2	tD(GUC)6	30515233	0.507	0.578
C6_04420W_A	cluster_2	NA	3645951	0.503	0.166
C6_04570W_A	cluster_2	NAG6	3645961	0.503	0.456
C1_13500C_A	cluster_2	NA	30515075	0.501	0.273
C2_01170C_A	cluster_2	NA	3638860	0.5	0.033
C3_01470W_A	cluster_2	ARF3	3636628	0.498	0.02
C1_06420C_A	cluster_2	NA	3639554	0.492	0.028
C6_02580W_A	cluster_2	NA	3639207	0.492	0.023
C4_03860C_A	cluster_2	NA	3647854	0.491	0.13
C2_07480W_A	cluster_2	LPT1	3645212	0.487	0.02
C1_02020W_A	cluster_2	NA	3645416	0.486	0.082
CR_01390W_A	cluster_2	MGE1	3640133	0.482	0.104
C6_02640C_A	cluster_2	NA	3639222	0.476	0.032
C1_02010C_A	cluster_2	ZCF24	3645417	0.475	0.107
C4_06910W_A	cluster_2	NA	3642933	0.468	0.594
C3_06400C_A	cluster_2	NA	3642260	0.463	0.054
CR_07380C_A	cluster_2	KSR1	3646052	0.463	0.025
C1_13970C_A	cluster_2	HPC2	3636188	0.456	0.051
C2_02870W_A	cluster_2	NA	3642972	0.455	0.05
C4_00610W_A	cluster_2	NA	3645770	0.453	0.038
C4_01530C_A	cluster_2	ERG251	3635716	0.45	0.209
C4_03570W_A	cluster_2	HWP1	3645372	0.448	0.385
C6_00430C_A	cluster_2	NA	3646089	0.448	0.039
C7_03340C_A	cluster_2	PRR2	3646723	0.448	0.182
CR_02440W_A	cluster_2	NA	3644923	0.448	0.174
C4_06970C_A	cluster_2	ZRT1	3642970	0.441	0.285
CR_05430W_A	cluster_2	CSP1	3648242	0.441	0.239
C1_12130C_A	cluster_2	ZCF30	3642051	0.439	0.035
C4_02610C_A	cluster_2	SUL2	3637835	0.436	0.264
C7_03770C_A	cluster_2	YAF9	3647864	0.433	0.221
CR_09980W_A	cluster_2	SPT7	3638928	0.433	0.08
C2_05510C_A	cluster_2	NA	3643420	0.428	0.058
C3_07200C_A	cluster_2	ZFU2	3638534	0.426	0.18
C7_00290C_A	cluster_2	HGT13	3638047	0.421	0.415
C2_03240C_A	cluster_2	ROM2	3637434	0.417	0.083
CR_10770W_A	cluster_2	NA	3638944	0.417	0.083
C1_08970W_A	cluster_2	NA	30515033	0.416	0.534
C2_03520C_A	cluster_2	ADAEC	3637342	0.415	0.102
C2_06440C_A	cluster_2	NA	3646565	0.415	0.066
C1_06720C_A	cluster_2	NA	3639509	0.414	0.052
C4_03540C_A	cluster_2	ECM38	3645375	0.414	0.11
C6_01850W_A	cluster_2	NA	3641629	0.414	0.214
C6_01380C_A	cluster_2	NA	3641606	0.413	0.37
C4_01390W_A	cluster_2	HAP3	3635629	0.406	0.25
CR_00560W_A	cluster_2	NTH1	3639665	0.405	0.087
C1_00060W_A	cluster_2	TUP1	3639369	0.404	0.193
C2_03150C_A	cluster_2	NA	3642990	0.404	0.112
C2_06160W_A	cluster_2	NA	3644079	0.402	0.142
C3_02290W_A	cluster_2	NA	3636556	0.399	0.23
C1_08030W_A	cluster_2	PFY1	3640703	0.396	0.137
CR_00880W_A	cluster_2	NA	3640397	0.395	0.213
C2_09230C_A	cluster_2	KIS1	3644063	0.392	0.093
C4_07230C_A	cluster_2	VID21	3642946	0.386	0.436
C7_03720C_A	cluster_2	HIS7	3647868	0.386	0.18
C1_13310W_A	cluster_2	ECM25	3636148	0.382	0.199
C6_04280W_A	cluster_2	NA	3646279	0.38	0.108
C2_07470W_A	cluster_2	YCS4	3645196	0.379	0.506
C2_03400C_A	cluster_2	DFG16	3637413	0.378	0.094
C3_07660W_A	cluster_2	NA	3638462	0.378	0.073
C1_07320W_A	cluster_2	NA	30515023	0.374	0.64
C2_01710W_A	cluster_2	HSK3	3635730	0.374	0.301
C4_06810C_A	cluster_2	NA	3642916	0.374	0.134
C2_00730C_A	cluster_2	NA	3638913	0.373	0.156
C2_03770C_A	cluster_2	STE11	3637369	0.373	0.326
C1_10130W_A	cluster_2	NA	30515040	0.372	0.418
C1_13410W_A	cluster_2	COX19	3636220	0.37	0.141
C4_02970C_A	cluster_2	UBR1	3637871	0.37	0.176
C3_02510C_A	cluster_2	SAP8	3638371	0.367	0.235
C5_04800W_A	cluster_2	CRH12	3636447	0.367	0.196
C1_14590C_A	cluster_2	TLO4	30515080	0.366	0.291
C2_09290W_A	cluster_2	NA	30515158	0.366	0.343
C2_03040W_A	cluster_2	PLC2	3642985	0.363	0.122
C5_00450C_A	cluster_2	IFG3	3641545	0.362	0.18
C7_03760W_A	cluster_2	NA	3647865	0.358	0.236
C2_02460W_A	cluster_2	ERG7	3635761	0.355	0.116
CR_00550W_A	cluster_2	NA	NA	0.354	0.644
CR_10460W_A	cluster_2	NA	30515457	0.352	0.581
C1_00200C_A	cluster_2	NA	3639336	0.349	0.467
C7_04090C_A	cluster_2	NA	3643135	0.349	0.194
CR_09060W_A	cluster_2	NA	3641925	0.349	0.625
C2_10630W_A	cluster_2	NA	3641248	0.347	0.16
C4_04410C_A	cluster_2	LYS4	3641180	0.342	0.185
C3_01390C_A	cluster_2	GEA2	3636646	0.341	0.228
C6_02310W_A	cluster_2	NA	3645875	0.337	0.17
C1_00730C_A	cluster_2	CMP1	3639328	0.336	0.187
C5_05430W_A	cluster_2	PEX4	3636429	0.335	0.201
C1_02210W_A	cluster_2	NA	3644594	0.332	0.217
C3_02550C_A	cluster_2	DCG1	3638373	0.332	0.23
CR_02430C_A	cluster_2	NA	3644924	0.329	0.196
C1_03310W_A	cluster_2	NA	3636856	0.328	0.146
C5_04790C_A	cluster_2	NA	3636446	0.324	0.159
CR_00690C_A	cluster_2	NA	3640390	0.323	0.164
C5_00870C_A	cluster_2	GIT4	3642635	0.322	0.494
C5_03580C_A	cluster_2	CAC2	3646978	0.318	0.173
CR_10710C_A	cluster_2	VPS52	3638996	0.317	0.192
C6_01090C_A	cluster_2	NA	3644020	0.314	0.37
C3_00970W_A	cluster_2	tG(UCC)1	30515172	0.312	0.692
C2_00180C_A	cluster_2	NA	3638905	0.308	0.275
CR_02000C_A	cluster_2	HEM1	3640149	0.3	0.232
C3_02410C_A	cluster_2	NA	3638341	0.297	0.272
CR_07560W_A	cluster_2	RGD3	3648003	0.294	0.245
C5_04640C_A	cluster_2	NA	3636397	0.292	0.315
C4_00590C_A	cluster_2	NA	3645772	0.287	0.298
C7_04150W_A	cluster_2	NA	3643128	0.286	0.311
C2_00710W_A	cluster_2	NPL6	3638883	0.284	0.552
C1_04680W_A	cluster_2	PIL1	3644769	0.283	0.462
C3_06560W_A	cluster_2	NA	3642276	0.28	0.252
C2_06260W_A	cluster_2	NA	3646913	0.276	0.341
C2_07170C_A	cluster_2	AFT2	3643511	0.276	0.264
CR_01190C_A	cluster_2	SFT1	30515372	0.275	0.585
C1_10150W_A	cluster_2	WOR1	3634781	0.272	0.535
C1_06830W_A	cluster_2	NA	30515011	0.265	0.655
C1_10120C_A	cluster_2	NA	3634779	0.265	0.224
C2_07590W_A	cluster_2	VMA10	3645215	0.265	0.317
C4_05210W_A	cluster_2	NA	3646154	0.258	0.456
C7_00900W_A	cluster_2	NA	NA	0.257	0.685
C1_14440C_A	cluster_2	GDI1	3643298	0.255	0.452
C3_05310W_A	cluster_2	USO6	3643647	0.252	0.398
C6_00140C_A	cluster_2	HPA2	3647907	0.252	0.449
C4_00580W_A	cluster_2	NA	3645773	0.248	0.358
C2_03660W_A	cluster_2	tE(CUC)1	30515101	0.245	0.771
C1_11760C_A	cluster_2	NA	3645328	0.241	0.294
C1_01850C_A	cluster_2	NA	3645431	0.239	0.347
C3_03780W_A	cluster_2	NA	3645637	0.234	0.89
CR_03960C_A	cluster_2	NA	3640963	0.23	0.382
C1_10820C_A	cluster_2	NA	3644435	0.224	0.409
C2_00360C_A	cluster_2	NA	3638825	0.219	0.39
C1_02200C_A	cluster_2	NA	3644593	0.218	0.512
CR_09120C_A	cluster_2	TUB1	3641930	0.218	0.397
C1_02830W_A	cluster_2	NA	3636876	0.217	0.356
CR_02700W_A	cluster_2	NA	3642575	0.217	0.569
C3_04470W_A	cluster_2	PKC1	3635210	0.216	0.391
C1_13240W_A	cluster_2	NA	3636167	0.212	0.513
C1_01780C_A	cluster_2	HOL4	3645409	0.21	0.452
C6_01260W_A	cluster_2	NA	NA	0.21	0.38
C3_02910W_A	cluster_2	NA	3638378	0.209	0.68
C1_03610C_A	cluster_2	IMP1	3636881	0.206	0.395
C6_00340C_A	cluster_2	NA	3646074	0.206	0.368
C1_08960W_A	cluster_2	NA	30515032	0.203	0.797
C3_03930W_A	cluster_2	NA	3645657	0.203	0.459
C2_10460C_A	cluster_2	NA	3641195	0.198	0.448
C4_06820C_A	cluster_2	CZF1	3642915	0.195	0.513
C2_06540C_A	cluster_2	SPF1	3646573	0.193	0.466
C3_00300W_A	cluster_2	NA	3640524	0.191	0.4
C6_00780W_A	cluster_2	SEC8	3647078	0.19	0.43
C2_00970C_A	cluster_2	UBP13	3638879	0.189	0.427
C1_04670W_A	cluster_2	HAT1	3644770	0.188	0.385
C3_01300C_A	cluster_2	NCE103	3636621	0.188	0.65
C1_13210C_A	cluster_2	NA	NA	0.181	0.767
CR_03050C_A	cluster_2	ZCF11	3645109	0.181	0.42
CR_00760C_A	cluster_2	HYR4	3640436	0.18	0.485
CR_09760W_A	cluster_2	MED21	3639010	0.18	0.589
C1_02460W_A	cluster_2	RPL10	3636850	0.176	0.525
C1_08760W_A	cluster_2	NA	3634787	0.175	0.575
C1_00520W_A	cluster_2	NA	3639310	0.174	0.734
C3_06200C_A	cluster_2	MMS21	3642265	0.174	0.506
C2_01120W_A	cluster_2	KAR2	3638830	0.173	0.546
C2_02910W_A	cluster_2	NA	30515097	0.173	0.771
C2_10590W_A	cluster_2	GAL4	3641244	0.17	0.683
C2_02190C_A	cluster_2	NA	3635753	0.169	0.496
C3_00280C_A	cluster_2	ULP3	3640526	0.168	0.668
C1_10660W_A	cluster_2	TBP1	3647675	0.166	0.489
C5_03100C_A	cluster_2	NA	3637704	0.162	0.51
C7_01190W_A	cluster_2	NA	3645902	0.161	0.519
CR_05360C_A	cluster_2	NA	3648033	0.161	0.661
CR_08000C_A	cluster_2	NA	3644150	0.158	0.576
C2_07230C_A	cluster_2	ZCF10	3643485	0.155	0.606
C4_00570C_A	cluster_2	PCT1	3645743	0.153	0.53
C7_04060W_A	cluster_2	NA	3643156	0.153	0.632
C5_00200C_A	cluster_2	BDF1	3641592	0.149	0.629
C5_00640C_A	cluster_2	SAM51	3641582	0.149	0.632
C1_01560W_A	cluster_2	SIZ1	3640219	0.146	0.594
C1_03550C_A	cluster_2	COQ6	3636878	0.143	0.534
C1_08500C_A	cluster_2	ENO1	3646493	0.143	0.736
C2_00490W_A	cluster_2	NA	3638870	0.14	0.543
C2_08800C_A	cluster_2	APE3	3643875	0.14	0.564
C4_02110W_A	cluster_2	NA	3635673	0.139	0.642
C3_07490W_A	cluster_2	NA	3638528	0.138	0.545
CR_02320W_A	cluster_2	NA	30515381	0.138	0.89
C2_02040W_A	cluster_2	NA	3635848	0.13	0.567
C2_10120W_A	cluster_2	NA	3643936	0.13	0.599
C3_01590W_A	cluster_2	NA	3636666	0.127	0.635
C7_00820W_A	cluster_2	RFC2	3637939	0.126	0.676
C1_12710C_A	cluster_2	NA	3646822	0.124	0.632
C7_00110W_A	cluster_2	SOD3	30515347	0.124	0.717
C4_06530C_A	cluster_2	XUT1	3642785	0.12	0.836
C3_07030C_A	cluster_2	NA	3638517	0.115	0.668
C4_03870C_A	cluster_2	NA	NA	0.113	0.903
C2_06210C_A	cluster_2	SER1	3646909	0.107	0.71
C1_13350W_A	cluster_2	STP2	3636214	0.106	0.719
C1_13220C_A	cluster_2	AKR1	3636166	0.105	0.71
C6_04430W_A	cluster_2	CST5	3645981	0.103	0.789
C2_09730C_A	cluster_2	IPK2	3643784	0.1	0.705
C7_00300W_A	cluster_2	NA	3638046	0.1	0.693
C2_09850C_A	cluster_2	NA	3643782	0.098	0.86
CR_09190C_A	cluster_2	NA	3641885	0.092	0.722
C6_04080W_A	cluster_2	NA	3647837	0.091	0.741
C2_01860C_A	cluster_2	NA	3635835	0.09	0.789
C2_03430W_A	cluster_2	NBN1	3637410	0.086	0.744
C2_09270C_A	cluster_2	SGT1	3644068	0.085	0.752
C7_02480W_A	cluster_2	NA	3636944	0.085	0.879
C2_03890W_A	cluster_2	NA	3637396	0.079	0.866
C5_02370C_A	cluster_2	NA	3637793	0.079	0.783
C6_03650C_A	cluster_2	POP2	3640301	0.079	0.768
C2_07650C_A	cluster_2	NA	3642342	0.076	0.782
C5_02580W_A	cluster_2	NA	3637721	0.075	0.77
C2_05120C_A	cluster_2	NA	NA	0.073	0.821
C3_04150W_A	cluster_2	NA	30515202	0.073	0.893
C1_01820C_A	cluster_2	NA	3645435	0.071	0.757
C1_08830C_A	cluster_2	NA	3634918	0.066	1
C1_08770W_A	cluster_2	NA	3634788	0.064	0.845
C1_03950C_A	cluster_2	NA	3646417	0.062	0.868
C5_03570W_A	cluster_2	NA	3646976	0.06	0.809
C1_10830W_A	cluster_2	BIG1	3644434	0.058	0.863
C1_04360C_A	cluster_2	NA	30514985	0.056	0.858
C1_05960W_A	cluster_2	PGA45	3639875	0.055	0.891
C2_03780C_A	cluster_2	NA	3637368	0.054	0.864
CR_05040W_A	cluster_2	NA	NA	0.05	1
C1_12430W_A	cluster_2	NA	3642013	0.049	0.877
C2_01570W_A	cluster_2	NA	3635782	0.049	0.932
C2_03010C_A	cluster_2	RNR21	3643021	0.045	0.887
C6_04540C_A	cluster_2	HAT2	3645973	0.04	0.897
C3_01360C_A	cluster_2	IRO1	3636648	0.037	0.878
C6_03910C_A	cluster_2	NA	3640263	0.034	0.897
C7_01330C_A	cluster_2	GCN2	3645897	0.033	0.918
CR_02120C_A	cluster_2	NA	3640143	0.03	0.952
C2_05200C_A	cluster_2	SGO1	3643464	0.028	0.946
CR_08460W_A	cluster_2	TPM2	30515441	0.021	0.953
C2_02180W_A	cluster_2	NA	3635752	0.02	0.99
C2_10280C_A	cluster_2	SPT23	3643958	0.02	0.958
C3_03210W_A	cluster_2	NA	3638315	0.02	0.967
C2_00370W_A	cluster_2	PDR6	3638824	0.019	0.97
C4_07240W_A	cluster_2	NA	3642945	0.014	0.967
C5_04710W_A	cluster_2	NA	3636517	0.014	0.959
CR_09640C_A	cluster_2	NA	30515456	0.011	0.975
C1_00680W_A	cluster_2	ASM3	3639332	0.009	1
C1_08060W_A	cluster_2	OFR1	3640710	0.008	0.984
C1_11300C_A	cluster_2	NA	3644552	0.008	0.982
C2_06300W_A	cluster_2	NA	3646924	0.007	0.972
C6_01250W_A	cluster_2	NA	NA	0.007	0.995
C3_02440C_A	cluster_2	MED7	3638344	0.006	1
C4_00140C_A	cluster_2	HIS4	3645025	0.006	0.99
C7_04340C_A	cluster_2	NA	30515361	0	1
C4_04160W_A	cluster_2	NA	3641185	-0.002	0.997
CR_02760C_A	cluster_2	RPD3	3642580	-0.002	1
C2_02340C_A	cluster_2	ENT3	3635813	-0.009	0.978
C7_00720W_A	cluster_2	RTF1	3637964	-0.009	0.986
C3_01370C_A	cluster_2	PGA44	3636647	-0.015	1
C5_03030W_A	cluster_2	NA	3637822	-0.016	1
C5_03820C_A	cluster_2	BUD7	3647228	-0.018	0.947
C5_05480W_A	cluster_2	DES1	3636529	-0.018	0.954
C7_00240W_A	cluster_2	NA	3637980	-0.023	0.959
C3_07370W_A	cluster_2	NA	3638474	-0.025	0.953
C1_04420C_A	cluster_2	URA6	3647988	-0.027	0.924
C4_00630C_A	cluster_2	SEC72	3645768	-0.028	0.915
C1_08230C_A	cluster_2	PLB5	3640750	-0.031	0.933
CR_07850W_A	cluster_2	NA	3647347	-0.035	0.906
C1_03220C_A	cluster_2	BMH1	3636810	-0.04	0.895
C1_00380C_A	cluster_2	NAA25	3639292	-0.042	0.865
C5_03060C_A	cluster_2	TNA1	3637827	-0.043	1
C5_05020C_A	cluster_2	NA	3636486	-0.045	0.879
C3_00750W_A	cluster_2	LYS144	3640512	-0.047	0.867
C1_14340C_A	cluster_2	RIM101	3643280	-0.05	0.901
C2_05460W_A	cluster_2	CDC19	3643438	-0.05	0.89
C1_01050C_A	cluster_2	NA	3640170	-0.051	0.86
C3_05460W_A	cluster_2	NA	3643670	-0.054	0.835
C4_01780C_A	cluster_2	NA	3635582	-0.054	0.854
C1_04400C_A	cluster_2	APE2	3647990	-0.057	0.851
C1_04400C_A	cluster_2	APE2	3647990	-0.057	0.851
C1_09610W_A	cluster_2	NA	3634891	-0.06	0.835
C6_02120W_A	cluster_2	CHC1	3647552	-0.064	0.835
C1_07520C_A	cluster_2	IST2	3646662	-0.065	0.819
C2_03690C_A	cluster_2	MNN42	3637376	-0.066	0.828
C4_00340W_A	cluster_2	PTC7	3645000	-0.069	0.78
C7_03040W_A	cluster_2	NA	3641379	-0.069	0.814
CR_06190C_A	cluster_2	NA	30515418	-0.072	0.944
C1_00170W_A	cluster_2	LEU4	3639339	-0.073	0.768
CR_02500W_A	cluster_2	NA	3647696	-0.073	0.794
C1_13700W_A	cluster_2	ACT1	3636195	-0.075	0.802
C3_00270C_A	cluster_2	NA	3640527	-0.075	0.854
C1_05010C_A	cluster_2	NA	3647532	-0.077	0.835
C6_04500C_A	cluster_2	TSM1	3645953	-0.078	0.783
C1_10920W_A	cluster_2	NA	3644433	-0.079	0.803
C5_01940W_A	cluster_2	NA	3643740	-0.08	0.745
C6_01840C_A	cluster_2	COQ3	3641630	-0.08	0.72
C2_05980C_A	cluster_2	NA	3644075	-0.082	0.735
CR_00330C_A	cluster_2	PXA1	3639713	-0.085	0.705
C1_02070W_A	cluster_2	HSP31	3644589	-0.086	1
C3_03690W_A	cluster_2	NA	3645647	-0.088	0.908
C1_05110C_A	cluster_2	ARO4	3647668	-0.09	0.748
C5_04970C_A	cluster_2	PPR1	3636535	-0.092	0.731
CR_00520C_A	cluster_2	CRM1	3639721	-0.094	0.758
C2_03280W_A	cluster_2	NSP1	3637430	-0.096	0.722
C1_09620C_A	cluster_2	NA	3634892	-0.097	0.72
C2_07370W_A	cluster_2	NA	3645233	-0.099	0.681
C7_01640W_A	cluster_2	LAT1	3636986	-0.099	0.775
CR_10160W_A	cluster_2	FAA4	3638973	-0.1	0.716
CR_02090C_A	cluster_2	CET1	3640140	-0.107	0.677
C2_03480C_A	cluster_2	NA	NA	-0.109	0.945
C1_11120C_A	cluster_2	NA	3644412	-0.113	0.675
C3_00800W_A	cluster_2	MIH1	3648188	-0.117	0.741
C3_05590C_A	cluster_2	BAT22	3643663	-0.117	0.664
C6_04300W_A	cluster_2	NA	3646286	-0.12	0.66
C1_08260C_A	cluster_2	LTP1	3640760	-0.122	0.615
C7_01340W_A	cluster_2	MRE11	3645898	-0.122	0.621
CR_06160C_A	cluster_2	DAD3	3644864	-0.123	0.697
C2_01340W_A	cluster_2	NA	3638844	-0.128	0.657
C2_05940C_A	cluster_2	VPS33	3647477	-0.128	0.616
C6_01590W_A	cluster_2	NA	3641650	-0.13	0.602
C2_06700W_A	cluster_2	AMO2	3648021	-0.131	0.663
CR_06110C_A	cluster_2	RFX1	3644844	-0.131	0.675
C3_02760C_A	cluster_2	NA	3638413	-0.139	0.63
CR_01750C_A	cluster_2	SEC4	3640119	-0.14	0.619
C6_00070C_A	cluster_2	PGA25	3647890	-0.143	0.617
C1_07490C_A	cluster_2	NA	3646666	-0.144	0.542
C6_02170C_A	cluster_2	SWD3	3645890	-0.144	0.539
C4_03130W_A	cluster_2	NA	3637921	-0.145	0.518
C1_02280C_A	cluster_2	PSY2	3644567	-0.147	0.548
C6_00260W_A	cluster_2	NA	3646065	-0.147	0.618
C1_07430W_A	cluster_2	PHO100	3644483	-0.149	0.722
CR_05700C_A	cluster_2	NA	3646701	-0.152	0.678
CR_03070W_A	cluster_2	DOM34	3645105	-0.155	0.493
C3_07170C_A	cluster_2	NA	3638536	-0.157	0.53
C2_03450W_A	cluster_2	NA	3637349	-0.159	0.484
C1_08470W_A	cluster_2	NA	3646490	-0.161	0.611
C5_01830C_A	cluster_2	HAL9	3643757	-0.161	0.482
C6_04230W_A	cluster_2	NA	3646274	-0.161	0.755
C4_06050W_A	cluster_2	MED3	3646522	-0.162	0.764
C5_04630W_A	cluster_2	NA	3636395	-0.166	0.498
C7_01860W_A	cluster_2	NA	NA	-0.166	0.621
CR_00990W_A	cluster_2	NA	3640425	-0.17	0.653
C1_03920C_A	cluster_2	NA	3646413	-0.172	0.586
C1_04340C_A	cluster_2	NA	3644685	-0.173	0.6
C3_04270C_A	cluster_2	CTP1	3635141	-0.173	0.462
C3_07210W_A	cluster_2	MET8	3638533	-0.174	0.579
CR_09790W_A	cluster_2	ALO1	3638983	-0.175	0.509
C2_10210C_A	cluster_2	RAS1	3643927	-0.178	0.519
C3_04910C_A	cluster_2	NCE102	3635267	-0.182	0.524
C5_01290C_A	cluster_2	NA	3642647	-0.183	0.435
CR_04200W_A	cluster_2	YDJ1	3640939	-0.183	0.543
C3_00500C_A	cluster_2	NA	3640515	-0.193	0.49
CR_08010W_A	cluster_2	DAD4	30515433	-0.193	0.59
CR_08340W_A	cluster_2	CYS3	3642081	-0.198	0.462
C3_00820W_A	cluster_2	SCT1	3648346	-0.199	0.426
C1_01920W_A	cluster_2	ROA1	3645424	-0.2	0.463
C6_01860C_A	cluster_2	HCH1	3641626	-0.201	0.39
C1_13880C_A	cluster_2	NA	3636133	-0.202	0.405
C1_08410C_A	cluster_2	SAM4	3646506	-0.206	0.492
C5_01410C_A	cluster_2	NA	3647054	-0.208	0.483
C2_02080W_A	cluster_2	NA	30515093	-0.212	0.845
CR_05480W_A	cluster_2	NA	3648238	-0.213	0.354
C4_06670W_A	cluster_2	NA	3642951	-0.214	0.421
C2_05680W_A	cluster_2	COG4	3645571	-0.216	0.377
C2_05550W_A	cluster_2	NA	3645560	-0.217	0.425
C1_03340C_A	cluster_2	SEC62	3636860	-0.218	0.322
C5_04650C_A	cluster_2	MSM1	3636398	-0.22	0.404
CR_04230W_A	cluster_2	NA	3640944	-0.221	0.368
CR_05910W_A	cluster_2	NA	3646680	-0.221	0.383
C6_02190C_A	cluster_2	NA	3645862	-0.225	0.374
C1_07900W_A	cluster_2	COI1	3640721	-0.226	0.564
C3_05120C_A	cluster_2	NA	3635159	-0.226	0.565
C6_03940C_A	cluster_2	PBP2	3640267	-0.228	0.416
C6_00720C_A	cluster_2	COX15	3647071	-0.229	0.464
C3_02690C_A	cluster_2	NA	3638407	-0.23	0.375
CR_02170W_A	cluster_2	MET2	3640070	-0.234	0.393
CR_08960C_A	cluster_2	MPS1	3641888	-0.238	0.583
CR_01970C_A	cluster_2	VMA4	3640111	-0.245	0.359
C7_03630C_A	cluster_2	TIM9	3646243	-0.246	0.376
C3_03370C_A	cluster_2	NA	3638366	-0.247	0.512
C2_01240C_A	cluster_2	NA	3638794	-0.249	0.306
C1_03540C_A	cluster_2	NA	3636920	-0.25	0.299
C4_00260W_A	cluster_2	NA	3645037	-0.25	0.253
C2_04620W_A	cluster_2	NA	3645438	-0.256	0.306
C3_03200C_A	cluster_2	NA	3638428	-0.257	0.402
C6_04340W_A	cluster_2	NA	3646291	-0.257	0.416
C7_03060C_A	cluster_2	CHS6	3641377	-0.257	0.236
C2_01590W_A	cluster_2	COX13	3635784	-0.26	0.324
C5_01250W_A	cluster_2	GPR1	3642616	-0.26	0.297
C1_07470C_A	cluster_2	NA	3646668	-0.261	0.351
C1_00960C_A	cluster_2	SET1	3639280	-0.27	0.37
CR_09240C_A	cluster_2	NA	3641919	-0.271	0.308
CR_05300C_A	cluster_2	MNN21	3648124	-0.273	0.287
C5_00940C_A	cluster_2	HAP5	3642654	-0.275	0.38
C6_01290C_A	cluster_2	QDR3	3644023	-0.275	0.296
C1_02750C_A	cluster_2	NA	3636828	-0.276	0.286
C1_04310C_A	cluster_2	GIG1	3644712	-0.276	0.517
C5_03210C_A	cluster_2	NA	3646364	-0.276	0.48
CR_06760C_A	cluster_2	LSC2	3646618	-0.276	0.325
C3_05870C_A	cluster_2	UBP1	3641760	-0.277	0.272
C6_03800C_A	cluster_2	NA	3640310	-0.278	0.289
C3_02680C_A	cluster_2	SLD1	3638406	-0.279	0.274
C6_02200C_A	cluster_2	NA	3645863	-0.284	0.516
C1_00400W_A	cluster_2	SVF1	3639289	-0.287	0.241
C1_06790C_A	cluster_2	MRPL19	3639497	-0.287	0.352
C1_08740C_A	cluster_2	SEC24	3634939	-0.287	0.262
C1_03770W_A	cluster_2	SKO1	3644688	-0.289	0.302
C4_05420C_A	cluster_2	TSC2	3646953	-0.289	0.304
C3_01730C_A	cluster_2	UTR2	3636591	-0.29	0.233
CR_09840C_A	cluster_2	NA	3638988	-0.292	0.281
C2_00810C_A	cluster_2	NA	3638810	-0.294	0.221
C3_00810C_A	cluster_2	FOX2	3648327	-0.294	0.223
C2_05440W_A	cluster_2	PEX6	3643436	-0.297	0.234
C2_02860W_A	cluster_2	SUR2	3642973	-0.299	0.443
C1_04200C_A	cluster_2	NA	3644718	-0.3	0.185
C3_05230W_A	cluster_2	SAP3	3635197	-0.3	0.549
C3_07590W_A	cluster_2	NA	3638496	-0.3	0.324
C7_01740C_A	cluster_2	NA	3637010	-0.307	0.221
C1_10650W_A	cluster_2	APN2	3647674	-0.308	0.2
C6_02000W_A	cluster_2	PLB2	3644562	-0.309	0.397
C6_00840W_A	cluster_2	GPX2	3644009	-0.313	0.267
C2_10790C_A	cluster_2	NA	3641242	-0.314	0.23
CR_01670W_A	cluster_2	NA	3640124	-0.314	0.223
C6_00590W_A	cluster_2	SLY41	3647139	-0.316	0.209
C4_04650W_A	cluster_2	NA	3641152	-0.321	0.217
C1_06050C_A	cluster_2	NA	30515003	-0.322	0.364
C1_09030C_A	cluster_2	COX5	3634768	-0.326	0.215
CR_06670W_A	cluster_2	CFL11	3646622	-0.331	0.922
C2_09760W_A	cluster_2	NA	3643807	-0.334	0.241
CR_01360W_A	cluster_2	NA	3640167	-0.337	0.239
CR_02620C_A	cluster_2	NA	3642567	-0.345	0.158
CR_10850C_A	cluster_2	ATP16	3638963	-0.346	0.285
C3_03390C_A	cluster_2	YAH1	3638368	-0.347	0.221
C4_01460C_A	cluster_2	NA	3635622	-0.348	0.176
C4_05550C_A	cluster_2	GVP36	3641772	-0.36	0.123
C1_10110W_A	cluster_2	NA	3634778	-0.362	0.228
C1_08750W_A	cluster_2	YMC2	3634786	-0.363	0.131
C1_06980C_A	cluster_2	NA	3639565	-0.365	0.127
C4_01770W_A	cluster_2	POL30	3635583	-0.372	0.245
C4_00270W_A	cluster_2	ATP2	3645039	-0.373	0.175
C7_02050C_A	cluster_2	EXO70	3636948	-0.376	0.107
C2_07390C_A	cluster_2	NA	3645229	-0.378	0.108
C1_03480C_A	cluster_2	AGE1	3636913	-0.379	0.083
C4_03290W_A	cluster_2	NA	3637887	-0.379	0.122
C2_06410W_A	cluster_2	NA	30515136	-0.38	0.405
C1_13520C_A	cluster_2	MCU1	3636169	-0.382	0.134
C6_02050W_A	cluster_2	DBR1	3647560	-0.383	0.1
C2_01090C_A	cluster_2	ERG28	3638833	-0.385	0.287
C7_00070C_A	cluster_2	NA	3638011	-0.389	0.356
C4_04440W_A	cluster_2	NA	3641177	-0.394	0.146
C2_08610W_A	cluster_2	ERG9	3643913	-0.397	0.413
C4_06800W_A	cluster_2	NA	3642917	-0.397	0.112
C6_03610W_A	cluster_2	FGR17	3640296	-0.399	0.201
C2_02660W_A	cluster_2	NA	3643009	-0.401	0.112
CR_09300C_A	cluster_2	SCO1	3641922	-0.401	0.106
C5_05400W_A	cluster_2	APM1	3636424	-0.402	0.079
C5_01590W_A	cluster_2	NA	3647041	-0.411	0.284
C1_07110W_A	cluster_2	TAF145	3639486	-0.414	0.165
C2_03410W_A	cluster_2	NA	3637412	-0.416	0.065
CR_02740W_A	cluster_2	INN1	3642578	-0.416	0.062
CR_04790W_A	cluster_2	MVB12	30515400	-0.417	0.12
C3_00460W_A	cluster_2	ATP5	3640521	-0.424	0.115
C2_00720C_A	cluster_2	FGR15	3638882	-0.425	0.058
C2_09970C_A	cluster_2	NA	3643820	-0.425	0.064
C4_04990C_A	cluster_2	NA	3641166	-0.429	0.135
C5_01950C_A	cluster_2	RIM21	3643739	-0.429	0.081
C1_01690C_A	cluster_2	LSC1	3640199	-0.431	0.102
C1_10930C_A	cluster_2	UBA4	3644432	-0.436	0.076
CR_04730W_A	cluster_2	NA	3647305	-0.436	0.114
C2_05400W_A	cluster_2	NA	3643435	-0.437	0.283
CR_03180W_A	cluster_2	NA	3645133	-0.437	0.047
C3_01030W_A	cluster_2	ARP9	3639829	-0.443	0.132
C2_02390W_A	cluster_2	NA	3635829	-0.446	0.205
C1_06920C_A	cluster_2	NA	3639525	-0.448	0.056
C2_05970C_A	cluster_2	TES1	3647480	-0.461	0.115
C3_04010C_A	cluster_2	tE(UUC)6	30515198	-0.461	0.516
C1_02850W_A	cluster_2	NA	3636862	-0.467	0.062
C1_12970C_A	cluster_2	SEC2	3636119	-0.467	0.057
C1_08020W_A	cluster_2	UBA2	3640701	-0.471	0.026
C1_08670W_A	cluster_2	SWI6	3634932	-0.471	0.03
C7_00270W_A	cluster_2	NA	3637977	-0.475	0.062
C3_07950C_A	cluster_2	SRB1	3647454	-0.48	0.063
C1_09020W_A	cluster_2	NA	3634917	-0.481	0.054
C3_06250W_A	cluster_2	ERV25	3642243	-0.482	0.056
C3_01980C_A	cluster_2	TOM6	3636596	-0.491	0.203
C3_07060W_A	cluster_2	FESUR1	3638514	-0.492	0.056
C3_05530W_A	cluster_2	OST1	3643657	-0.493	0.055
C1_07170C_A	cluster_2	ZCF23	3644477	-0.494	0.116
C6_04380W_A	cluster_2	ALS2	3645724	-0.497	0.184
C1_12200W_A	cluster_2	MCD4	3642036	-0.506	0.067
C2_03080W_A	cluster_2	IDH2	3642979	-0.506	0.07
C2_05330C_A	cluster_2	NA	3643426	-0.508	0.398
CR_09600C_A	cluster_2	YKE2	30515454	-0.51	0.065
C1_11350C_A	cluster_2	TOS4	3644548	-0.513	0.03
C1_06930W_A	cluster_2	PGA63	3639524	-0.516	0.07
C3_07460W_A	cluster_2	NA	3638480	-0.518	0.151
C6_04250W_A	cluster_2	NA	30515345	-0.518	0.052
CR_08320W_A	cluster_2	ATS1	3642079	-0.518	0.387
C1_12210W_A	cluster_2	TRP3	3642035	-0.519	0.036
C2_08090W_A	cluster_2	NA	3642336	-0.522	0.307
C2_08090W_A	cluster_2	NA	3642336	-0.522	0.307
C2_08380C_A	cluster_2	NA	3648253	-0.527	0.012
C4_06570C_A	cluster_2	PDC11	3642780	-0.53	0.241
C1_03100W_A	cluster_2	NA	3636925	-0.531	0.034
C7_00400W_A	cluster_2	LEU2	3638034	-0.535	0.013
C5_02190C_A	cluster_2	NA	30515303	-0.536	0.03
CR_00010C_A	cluster_2	NA	3639712	-0.537	0.015
C6_04070C_A	cluster_2	NA	3647826	-0.538	0.12
C3_02320W_A	cluster_2	ILV2	3636552	-0.543	0.039
C6_00600C_A	cluster_2	YHM2	3647137	-0.546	0.028
C2_03570C_A	cluster_2	NA	3637336	-0.551	0.039
C2_04170C_A	cluster_2	NA	30515111	-0.551	0.053
C3_00730W_A	cluster_2	NA	3640530	-0.554	0.022
CR_02920C_A	cluster_2	AQY1	3642587	-0.556	0.463
C1_10430W_A	cluster_2	PHO8	3647179	-0.562	0.186
C3_01260C_A	cluster_2	NA	3636625	-0.563	0.232
CR_05070W_A	cluster_2	tH(GUG)1	30515401	-0.564	0.503
C1_03400W_A	cluster_2	NA	3636904	-0.566	0.016
CR_01660C_A	cluster_2	SEC65	3640123	-0.572	0.006
CR_09440C_A	cluster_2	NA	3641937	-0.572	0.017
C1_04610W_A	cluster_2	ATP1	3646134	-0.574	0.058
C1_12230W_A	cluster_2	SNT1	3642033	-0.581	0.095
CR_01740W_A	cluster_2	MCI4	3640118	-0.582	0.019
C3_02930W_A	cluster_2	NA	3638380	-0.586	0.105
C7_02110W_A	cluster_2	NA	3637022	-0.586	0.016
C1_12250C_A	cluster_2	NA	3642022	-0.601	0.01
C1_01530C_A	cluster_2	NA	3640232	-0.602	0.014
C3_06960C_A	cluster_2	tY(GUA)3	30515221	-0.602	0.503
C2_10250C_A	cluster_2	SET2	3643923	-0.604	0.007
C5_02620C_A	cluster_2	NA	3637783	-0.605	0.003
C1_14140C_A	cluster_2	SET3	3643320	-0.61	0.007
C2_06590C_A	cluster_2	GIT1	3646562	-0.615	0.306
C4_04150C_A	cluster_2	PDB1	3641186	-0.615	0.023
C2_10740C_A	cluster_2	NA	3641236	-0.617	0.011
C1_07290W_A	cluster_2	NA	NA	-0.619	0.099
C1_07290W_A	cluster_2	NA	NA	-0.619	0.099
C7_02100W_A	cluster_2	NA	3637023	-0.62	0.011
C2_08050C_A	cluster_2	SIT1	3642307	-0.621	0.17
C4_04760C_A	cluster_2	NA	3641118	-0.621	0.009
C1_01090C_A	cluster_2	NA	3640174	-0.622	0.232
C1_00120C_A	cluster_2	TRP1	3639321	-0.625	0.016
C1_10530W_A	cluster_2	SNL1	3647192	-0.626	0.017
C1_11170W_A	cluster_2	WBP1	3644398	-0.628	0.008
C2_03920C_A	cluster_2	GPI13	3637424	-0.63	0.005
C1_01840C_A	cluster_2	NA	3645432	-0.632	0.041
C2_04220C_A	cluster_2	TAF14	3637357	-0.651	0.005
C1_08590C_A	cluster_2	ERG1	3646509	-0.655	0.028
CR_05180C_A	cluster_2	SDH2	3646397	-0.655	0.018
CR_05180C_A	cluster_2	SDH2	3646397	-0.655	0.018
C1_13110C_A	cluster_2	CHS3	3636199	-0.66	0.012
C2_08850C_A	cluster_2	NA	3643890	-0.661	0.003
C3_00350W_A	cluster_2	TPT1	3640543	-0.662	0.02
C2_10130W_A	cluster_2	NA	3643935	-0.663	0.019
C5_00380W_A	cluster_2	NA	3641553	-0.666	0.16
C5_04890C_A	cluster_2	NA	3636415	-0.668	0.007
C5_00970W_A	cluster_2	tE(UUC)3	30515295	-0.672	0.228
C6_01950C_A	cluster_2	NA	3644558	-0.672	0.005
C7_00510W_A	cluster_2	MAC1	3637985	-0.673	0.039
C7_01750W_A	cluster_2	NA	3637009	-0.673	0.012
C3_00470W_A	cluster_2	NA	3640520	-0.674	0.001
C3_06540C_A	cluster_2	NA	3642274	-0.674	0.153
C3_04530C_A	cluster_2	TEC1	3635261	-0.675	0.002
C1_01710W_A	cluster_2	NA	3640201	-0.678	0.009
C3_01970C_A	cluster_2	NA	3636597	-0.684	0.242
C2_04000C_A	cluster_2	NA	3637365	-0.686	0.279
CR_08440W_A	cluster_2	NA	3642132	-0.688	0.044
C3_05780C_A	cluster_2	CRZ1	3641722	-0.691	0.002
C4_02760C_A	cluster_2	CGR1	3637853	-0.691	0.009
C1_08200W_A	cluster_2	NTG1	3640746	-0.699	0.015
C4_05290W_A	cluster_2	ABZ1	3648307	-0.7	0.006
CR_02140W_A	cluster_2	RSR1	3640145	-0.701	0.001
C2_03470C_A	cluster_2	COX6	30515099	-0.706	0.005
CR_00340C_A	cluster_2	NA	30515365	-0.708	0.208
C3_04140C_A	cluster_2	EGD2	3635284	-0.71	0.007
C3_04300C_A	cluster_2	POL1	3635144	-0.711	0.013
C7_04030C_A	cluster_2	KAP120	3643110	-0.714	0.001
C1_09720W_A	cluster_2	URA1	3634819	-0.719	0.017
C1_08600C_A	cluster_2	GCD6	3646510	-0.722	0.004
C6_04060W_A	cluster_2	NA	3647828	-0.722	0.007
C1_03080C_A	cluster_2	TEM1	3636923	-0.726	0.009
C3_03030C_A	cluster_2	ECM14	3638392	-0.726	0.001
C2_02000W_A	cluster_2	NA	3635767	-0.729	0.001
C3_05150W_A	cluster_2	NA	3635162	-0.732	0.003
CR_10390W_A	cluster_2	NA	3638954	-0.733	0.005
C4_01250W_A	cluster_2	NAT4	3635704	-0.74	0.025
C5_01960C_A	cluster_2	NA	3643738	-0.74	0.002
C1_09750W_A	cluster_2	NA	3634822	-0.744	0.008
C3_00450C_A	cluster_2	NA	3640548	-0.745	0.004
C2_05240C_A	cluster_2	tQ(UUG)3	30515118	-0.747	0.354
C5_03150W_A	cluster_2	NA	3637799	-0.751	0.002
CR_10760C_A	cluster_2	NA	3638943	-0.752	0.017
C2_01620W_A	cluster_2	COX4	3635737	-0.753	0.004
C3_02520W_A	cluster_2	tM(CAU)1	30515188	-0.753	0.305
C5_02240W_A	cluster_2	PTH2	3637709	-0.756	0.043
CR_02780W_A	cluster_2	NA	3642582	-0.757	0.062
C2_07810W_A	cluster_2	NA	3642324	-0.766	0
CR_03160W_A	cluster_2	NA	3645117	-0.771	0.002
CR_05540C_A	cluster_2	NA	3647594	-0.771	0
C2_02100W_A	cluster_2	SNF2	3635855	-0.773	0.001
C2_06370C_A	cluster_2	SCP1	3646554	-0.777	0.13
C1_00410C_A	cluster_2	NA	3639287	-0.779	0.001
CR_09480W_A	cluster_2	NA	3641939	-0.779	0.006
C1_00390W_A	cluster_2	ENA2	3639291	-0.787	0.001
C1_09640W_A	cluster_2	ADE12	3634869	-0.789	0.001
C6_03810W_A	cluster_2	NA	3640286	-0.794	0.001
C3_06970W_A	cluster_2	NA	3638506	-0.798	0.025
C4_01060W_A	cluster_2	MLP1	3635688	-0.798	0.001
C4_04830W_A	cluster_2	DCR1	3641164	-0.798	0
C2_04950C_A	cluster_2	CYT1	3643441	-0.805	0.001
CR_04570C_A	cluster_2	CDC10	3640947	-0.81	0
C2_06090W_A	cluster_2	NA	3644097	-0.814	0
C5_02760W_A	cluster_2	CKB2	3637741	-0.82	0
C7_01900W_A	cluster_2	NUC2	3637030	-0.822	0.001
C1_09320C_A	cluster_2	NA	3634834	-0.824	0.001
C1_14280C_A	cluster_2	NPL3	3643310	-0.824	0.005
C2_05470W_A	cluster_2	COQ5	3643416	-0.83	0
C4_05180C_A	cluster_2	NA	3647413	-0.833	0
C2_10610W_A	cluster_2	GYP5	3641246	-0.835	0
CR_07790C_A	cluster_2	YHB1	3647353	-0.836	0.145
C4_05430C_A	cluster_2	GAP5	3646954	-0.838	0
C2_05520W_A	cluster_2	NA	3643421	-0.839	0
C7_02300W_A	cluster_2	YPS7	3636937	-0.841	0
C5_00040C_A	cluster_2	NA	3647874	-0.846	0.001
C2_07420W_A	cluster_2	NA	3645202	-0.849	0
C4_01230C_A	cluster_2	NA	3635706	-0.849	0.002
C1_14150C_A	cluster_2	PAM16	3643321	-0.851	0
CR_07020W_A	cluster_2	NA	3645731	-0.862	0.007
C3_06260C_A	cluster_2	NA	3642240	-0.879	0
C1_01330C_A	cluster_2	DUT1	3640188	-0.883	0.001
C5_04610W_A	cluster_2	NA	3636393	-0.889	0
C2_06200C_A	cluster_2	NA	3646908	-0.891	0.003
C5_05220W_A	cluster_2	CAG1	3636469	-0.892	0.012
CR_08220C_A	cluster_2	tK(UUU)3	30515436	-0.892	0.225
C1_02650W_A	cluster_2	NA	3636818	-0.895	0
C7_01720W_A	cluster_2	NA	3637011	-0.895	0
C6_00560W_A	cluster_2	NA	3647143	-0.9	0
C2_04970W_A	cluster_2	ABP2	3643443	-0.901	0.003
C6_02810C_A	cluster_2	NA	3639248	-0.905	0
CR_07460C_A	cluster_2	NA	3646049	-0.907	0
C4_00330C_A	cluster_2	NA	30515227	-0.91	0.001
C3_04400C_A	cluster_2	NUP85	3635175	-0.911	0
C1_10100C_A	cluster_2	NTF2	30515039	-0.912	0.001
C6_01000C_A	cluster_2	NA	3644048	-0.912	0
C1_04840C_A	cluster_2	NA	3644785	-0.915	0.001
C2_08730W_A	cluster_2	MFG1	3643884	-0.915	0.001
C2_03070C_A	cluster_2	SMP3	3642980	-0.916	0
C1_05190C_A	cluster_2	NA	30514991	-0.922	0
C4_06220C_A	cluster_2	NA	3642814	-0.925	0.141
C1_02770W_A	cluster_2	NA	30514973	-0.927	0.001
C1_11130W_A	cluster_2	FGR16	3644411	-0.935	0.001
C1_11900C_A	cluster_2	NA	3642005	-0.944	0.031
C3_05350C_A	cluster_2	SMI1B	3643675	-0.957	0.001
C1_03200C_A	cluster_2	ARO80	3636808	-0.958	0.007
C4_04690C_A	cluster_2	tQ(UUG)4	30515271	-0.96	0.187
CR_10370W_A	cluster_2	HCR1	3638952	-0.964	0
C7_01620C_A	cluster_2	KCH1	3636988	-0.967	0
C4_03120C_A	cluster_2	BUB1	3637922	-0.968	0
CR_09620C_A	cluster_2	NA	6335435	-0.972	0.007
C7_00080C_A	cluster_2	SAC7	3638010	-0.975	0.016
CR_09590W_A	cluster_2	NA	3647095	-0.981	0.002
CR_09450C_A	cluster_2	tD(GUC)7	30515452	-0.991	0.234
CR_00730C_A	cluster_2	tT(AGU)3	30515369	-0.993	0.219
C1_12550C_A	cluster_2	CDC54	3647606	-0.997	0
C1_03710C_A	cluster_2	MSB1	3648218	-0.999	0.002
C2_05030C_A	cluster_2	RHO3	3643448	-0.999	0
C1_13030C_A	cluster_2	NA	3636122	-1.009	0
C2_01130W_A	cluster_2	NOT3	3638829	-1.011	0
C3_01240C_A	cluster_2	tR(CCU)1	30515177	-1.011	0.193
C1_12590W_A	cluster_2	ATP20	3647602	-1.018	0
C5_05340W_A	cluster_2	NA	3636400	-1.018	0.001
C3_04080W_A	cluster_2	NA	30515200	-1.019	0
C6_02490C_A	cluster_2	NA	3639171	-1.029	0
C2_05040C_A	cluster_2	NA	3643449	-1.03	0
C2_10360C_A	cluster_2	HEM3	3643940	-1.031	0
CR_01590C_A	cluster_2	TRP2	3640079	-1.033	0
C1_06800W_A	cluster_2	NA	3639496	-1.038	0
C1_01170C_A	cluster_2	ZCF17	3640205	-1.039	0
C2_09400C_A	cluster_2	ERG24	3647716	-1.039	0
C1_14290C_A	cluster_2	MDG1	3643311	-1.041	0
C5_02000C_A	cluster_2	ACH1	3643773	-1.041	0
C2_00820W_A	cluster_2	NA	3638809	-1.051	0
C4_05310W_A	cluster_2	NA	3646958	-1.052	0.006
C4_01740W_A	cluster_2	TIM12	3635587	-1.053	0.001
C2_01220W_A	cluster_2	NA	3638856	-1.055	0
C7_03010W_A	cluster_2	NA	3641382	-1.055	0.003
C1_13320C_A	cluster_2	NA	3636149	-1.066	0
C4_02400C_A	cluster_2	NA	3637851	-1.066	0
C7_02290W_A	cluster_2	NA	3636938	-1.066	0.047
C4_02710C_A	cluster_2	GRX3	3637858	-1.067	0
C5_04340W_A	cluster_2	NA	3636481	-1.071	0
C3_06940W_A	cluster_2	NA	3638509	-1.073	0
C1_11650W_A	cluster_2	EGD1	3645340	-1.074	0
C4_06170C_A	cluster_2	NA	3642818	-1.077	0
C2_07410W_A	cluster_2	NA	3645203	-1.092	0
C1_14360C_A	cluster_2	WSC4	3643282	-1.1	0
C3_02050C_A	cluster_2	tE(UUC)2	30515184	-1.106	0.099
C6_03690W_A	cluster_2	ALS5	3640277	-1.123	0
CR_05410C_A	cluster_2	tR(ACG)1	30515408	-1.125	0.129
CR_10380C_A	cluster_2	NA	3638953	-1.128	0
CR_04700C_A	cluster_2	tS(GCU)1	30515398	-1.134	0.154
C2_02310W_A	cluster_2	NA	3635809	-1.143	0.003
C2_07910C_A	cluster_2	NA	30515146	-1.143	0
C6_02340W_A	cluster_2	HRR25	3645878	-1.143	0
C2_08450W_A	cluster_2	NA	3643905	-1.145	0
C3_04940W_A	cluster_2	NA	3635270	-1.159	0
C5_00030W_A	cluster_2	NA	3647879	-1.16	0.009
CR_01690C_A	cluster_2	CDC60	3640128	-1.16	0
C5_01900C_A	cluster_2	NA	30515302	-1.161	0
C2_10030C_A	cluster_2	MP65	3643951	-1.166	0
C7_00700W_A	cluster_2	CYB5	3637965	-1.169	0
C7_00470C_A	cluster_2	PEL1	3637989	-1.179	0.001
C4_01920W_A	cluster_2	DPM3	30515245	-1.18	0.001
C3_04930C_A	cluster_2	HGT4	3635269	-1.187	0
C5_01190W_A	cluster_2	NA	3642659	-1.189	0
C5_02180C_A	cluster_2	LEU3	3637757	-1.192	0
C1_00070W_A	cluster_2	MVD	3639306	-1.193	0.001
C3_07410C_A	cluster_2	KRS1	3638486	-1.2	0
C1_12010C_A	cluster_2	KIP4	3642032	-1.204	0
C4_01710C_A	cluster_2	NA	3635708	-1.214	0
C4_01710C_A	cluster_2	NA	3635708	-1.214	0
C7_02600C_A	cluster_2	NA	3648286	-1.215	0.006
CR_10490W_A	cluster_2	EIF4E	3638981	-1.215	0
C1_06340W_A	cluster_2	NA	3639499	-1.218	0.001
C3_03220C_A	cluster_2	tK(CUU)1	30515193	-1.228	0.188
C5_05230C_A	cluster_2	NA	3636470	-1.23	0
C1_10160W_A	cluster_2	MIR1	3634782	-1.232	0
C1_04000C_A	cluster_2	KTR4	3646425	-1.234	0.001
C1_04110W_A	cluster_2	NA	3644699	-1.238	0
C2_06310C_A	cluster_2	GSP1	3646925	-1.24	0
C6_04350C_A	cluster_2	FLO8	3646292	-1.247	0
C1_05570W_A	cluster_2	tN(GUU)2	30514996	-1.25	0.154
C5_02950C_A	cluster_2	NA	NA	-1.251	0.076
C7_01880C_A	cluster_2	NA	3637031	-1.252	0
C2_06640C_A	cluster_2	VAS1	3648340	-1.26	0
CR_09810W_A	cluster_2	NA	3638985	-1.261	0
C2_04930C_A	cluster_2	CRK1	3643414	-1.268	0
C3_04500C_A	cluster_2	RPL19A	3635257	-1.279	0
C1_08420W_A	cluster_2	GCR3	3646485	-1.28	0
C5_02170C_A	cluster_2	GCD11	3637755	-1.28	0
C3_05060W_A	cluster_2	NA	3635241	-1.286	0
C5_01040W_A	cluster_2	NA	3642649	-1.299	0
C1_08620W_A	cluster_2	CTR2	3648427	-1.3	0
C3_01480C_A	cluster_2	RKI1	3636574	-1.301	0
C3_07290W_A	cluster_2	NA	3638430	-1.304	0
C2_09200W_A	cluster_2	tP(UGG)2	30515157	-1.306	0.062
CR_02680W_A	cluster_2	NA	3642573	-1.314	0
C6_00150W_A	cluster_2	ARD	3647906	-1.318	0
C1_03490W_A	cluster_2	NA	3636914	-1.323	0
C3_06720W_A	cluster_2	PRP5	3638447	-1.323	0
C1_08050W_A	cluster_2	NA	3640709	-1.329	0
C6_04180W_A	cluster_2	NA	3648176	-1.333	0
C2_00880W_A	cluster_2	NA	3638897	-1.335	0
C3_06890W_A	cluster_2	PMT2	3638538	-1.34	0
C2_02720W_A	cluster_2	NA	3643002	-1.345	0
C5_00920W_A	cluster_2	NA	3642630	-1.347	0
C5_03290C_A	cluster_2	NA	30515307	-1.35	0.003
C1_02430C_A	cluster_2	NA	3636846	-1.363	0
C2_04960C_A	cluster_2	NA	3643442	-1.364	0
C3_04210W_A	cluster_2	NA	3635185	-1.364	0.009
C1_05310W_A	cluster_2	tP(UGG)1	30514992	-1.365	0.077
C1_08360C_A	cluster_2	OLE1	3640755	-1.371	0
C1_10900C_A	cluster_2	tI(UAU)1	30515045	-1.374	0.119
C7_03830C_A	cluster_2	NA	3643147	-1.374	0
C2_00690W_A	cluster_2	NA	3638885	-1.375	0
C3_00980W_A	cluster_2	FLC1	3639854	-1.385	0
CR_02080W_A	cluster_2	tL(AAG)1	30515379	-1.386	0.058
CR_09630W_A	cluster_2	tN(GUU)4	30515455	-1.386	0.122
C1_01910W_A	cluster_2	NA	3645425	-1.389	0
C6_00620W_A	cluster_2	FCA1	30515327	-1.398	0
CR_01440C_A	cluster_2	NA	30515374	-1.403	0.001
CR_03770C_A	cluster_2	RPS30	30515390	-1.409	0
C1_09130W_A	cluster_2	MNN47	3634943	-1.411	0
C1_01510W_A	cluster_2	NA	3640229	-1.429	0.026
C6_03870C_A	cluster_2	tA(UGC)2	30515342	-1.429	0.089
C2_00030W_A	cluster_2	RRN3	3647925	-1.436	0
C1_10640C_A	cluster_2	PEA2	3647673	-1.439	0
C1_11110C_A	cluster_2	NA	3644413	-1.444	0
C2_09720W_A	cluster_2	SUP35	3643785	-1.445	0
CR_03020C_A	cluster_2	NA	3642598	-1.445	0
C7_01160C_A	cluster_2	NA	30515351	-1.45	0
C5_04090C_A	cluster_2	SUI1	3647730	-1.458	0
C7_03610C_A	cluster_2	NA	3646241	-1.459	0
CR_00670C_A	cluster_2	NA	3639655	-1.462	0
CR_02950C_A	cluster_2	NA	3642590	-1.464	0
C1_13200C_A	cluster_2	REX3	3636164	-1.485	0
C3_07420W_A	cluster_2	NA	3638485	-1.5	0
C1_01490W_A	cluster_2	NA	3640226	-1.502	0
C4_02090C_A	cluster_2	NA	3635642	-1.511	0
C3_03790W_A	cluster_2	MEU1	3645635	-1.515	0
C4_06580W_A	cluster_2	CBF1	3642779	-1.525	0
C3_03910W_A	cluster_2	HTA1	3645658	-1.526	0
C2_04890C_A	cluster_2	tD(GUC)5	30515114	-1.527	0.058
C3_05880C_A	cluster_2	NA	3641737	-1.532	0
C4_02100C_A	cluster_2	GPI14	3635641	-1.545	0
C1_04620W_A	cluster_2	NA	3646135	-1.551	0
C4_03800C_A	cluster_2	NUP84	3645351	-1.556	0
C5_00980W_A	cluster_2	TRY3	3642652	-1.576	0
C1_10390C_A	cluster_2	RPL42	30515041	-1.584	0
C4_05360C_A	cluster_2	NA	3646949	-1.589	0
C1_00740C_A	cluster_2	SPE1	3639327	-1.599	0
C1_07400C_A	cluster_2	NA	3644464	-1.6	0
C2_00200W_A	cluster_2	NA	3638903	-1.602	0
C5_00700C_A	cluster_2	SPE2	3644116	-1.618	0
C3_06240C_A	cluster_2	NA	30515213	-1.623	0
C1_10870W_A	cluster_2	RPS17B	30515044	-1.628	0
CR_04050C_A	cluster_2	MEX67	3641020	-1.629	0
C2_05410W_A	cluster_2	NA	30515120	-1.63	0
C3_04520C_A	cluster_2	ADE2	3635259	-1.646	0
C4_06850C_A	cluster_2	NA	3642912	-1.648	0
C4_02270C_A	cluster_2	BFR1	3635579	-1.649	0
C5_02350C_A	cluster_2	NA	3637791	-1.658	0
C1_11360W_A	cluster_2	RPL37B	30515053	-1.668	0
CR_03030C_A	cluster_2	RPL28	30515386	-1.668	0
C4_04590W_A	cluster_2	SCS7	3641157	-1.669	0
C4_02440C_A	cluster_2	PGA38	3637846	-1.673	0
C3_06840C_A	cluster_2	tW(CCA)2	30515220	-1.682	0.036
CR_10830C_A	cluster_2	NA	3638960	-1.683	0
C3_06220C_A	cluster_2	OAC1	3642245	-1.686	0
C5_04720C_A	cluster_2	NA	3636518	-1.686	0
C7_03790W_A	cluster_2	MRP7	3643118	-1.686	0
C1_13280C_A	cluster_2	NA	3636145	-1.694	0
C4_00660W_A	cluster_2	NA	3645755	-1.701	0
C3_07570C_A	cluster_2	NA	3638522	-1.709	0
C2_03560C_A	cluster_2	NA	3637337	-1.714	0
C1_05580W_A	cluster_2	tN(GUU)1	30514997	-1.717	0.037
C5_00510W_A	cluster_2	NA	3641539	-1.732	0
C4_06610C_A	cluster_2	SDH12	3642775	-1.742	0
C2_03100W_A	cluster_2	EFT2	3642998	-1.753	0
C2_01080C_A	cluster_2	tL(CAA)2	30515087	-1.781	0.059
C1_00590W_A	cluster_2	TUF1	3639360	-1.79	0
C6_00790C_A	cluster_2	CTR1	3647077	-1.795	0
C4_01100C_A	cluster_2	AGP2	3635684	-1.817	0
CR_00350W_A	cluster_2	NA	3639686	-1.83	0
C1_02120C_A	cluster_2	SHA3	3644580	-1.848	0.001
C1_08580C_A	cluster_2	VCX1	3646508	-1.858	0
C2_09510C_A	cluster_2	NA	3643816	-1.862	0
C2_10810W_A	cluster_2	NA	3641243	-1.862	0
C4_05460C_A	cluster_2	OFD1	3646962	-1.871	0
C3_03900C_A	cluster_2	HTB1	3645659	-1.877	0
C1_06440C_A	cluster_2	NA	3639552	-1.878	0
C1_13170C_A	cluster_2	MSH6	3636161	-1.879	0
C3_05540C_A	cluster_2	NA	3643658	-1.885	0
C1_06890C_A	cluster_2	NA	30515014	-1.887	0
C2_09920W_A	cluster_2	NA	3643776	-1.894	0
C2_05610C_A	cluster_2	RPS8A	3645565	-1.902	0
C5_00130C_A	cluster_2	NA	3647881	-1.904	0
CR_05600C_A	cluster_2	tC(GCA)1	30515411	-1.909	0.062
C1_11060C_A	cluster_2	RPL2	30515049	-1.913	0
C1_08630W_A	cluster_2	NA	3634928	-1.924	0
CR_01580C_A	cluster_2	DOT6	3640078	-1.928	0
C1_02790W_A	cluster_2	TIF34	3636872	-1.93	0
C1_04370C_A	cluster_2	NA	3647994	-1.934	0
C2_05820W_A	cluster_2	NA	3647482	-1.948	0
C7_03500W_A	cluster_2	NA	3646246	-1.96	0
C1_12390C_A	cluster_2	RPL27A	30515062	-1.963	0
C1_13870W_A	cluster_2	MET3	3636132	-1.967	0
C5_03480C_A	cluster_2	NA	3646965	-1.968	0
C1_01350C_A	cluster_2	TIF	3640190	-1.969	0
C2_08760C_A	cluster_2	TIF4631	3643880	-1.973	0
C5_01910W_A	cluster_2	GIS2	3643744	-1.974	0
C5_03070W_A	cluster_2	RPS5	3637700	-1.988	0
CR_09800C_A	cluster_2	NA	3638984	-1.997	0
C1_07360W_A	cluster_2	NA	3644470	-2.002	0
C4_06990W_A	cluster_2	MNN46	3642968	-2.005	0
C4_01210C_A	cluster_2	tS(UGA)3	30515235	-2.031	0.005
C3_07500W_A	cluster_2	VAN1	3638527	-2.043	0
C2_05370C_A	cluster_2	RXT3	3643431	-2.049	0
C5_00960W_A	cluster_2	tE(UUC)4	30515294	-2.049	0
C1_06090C_A	cluster_2	NA	3639822	-2.062	0
C7_04140C_A	cluster_2	NA	3643129	-2.065	0
C3_06980W_A	cluster_2	HUT1	3638505	-2.068	0
C1_03420W_A	cluster_2	tN(GUU)3	30514978	-2.093	0.029
C2_03860W_A	cluster_2	tF(GAA)3	30515107	-2.096	0.007
C2_04370W_A	cluster_2	NA	3645460	-2.104	0
C1_11160C_A	cluster_2	NA	3644399	-2.11	0
C4_03250C_A	cluster_2	RHD2	3637891	-2.118	0
C5_03710C_A	cluster_2	NA	3647240	-2.141	0
CR_05820C_A	cluster_2	tP(UGG)4	30515413	-2.141	0.002
C2_04820W_A	cluster_2	NA	3647776	-2.144	0
C2_02710C_A	cluster_2	NA	3643003	-2.15	0
C3_01350C_A	cluster_2	URA3	3636649	-2.185	0
C5_00400C_A	cluster_2	NA	3641550	-2.188	0
C2_03740W_A	cluster_2	tF(GAA)2	30515103	-2.189	0.002
C3_05960W_A	cluster_2	ASE1	3641729	-2.196	0
C2_05670C_A	cluster_2	NA	3645570	-2.197	0
CR_05930C_A	cluster_2	tS(AGA)1	30515416	-2.207	0.001
C5_04590C_A	cluster_2	RPL43A	30515319	-2.21	0
CR_00810W_A	cluster_2	NA	3640415	-2.214	0
C5_00630C_A	cluster_2	EXO1	3641583	-2.216	0
C2_06500W_A	cluster_2	tI(AAU)1	30515138	-2.238	0.011
CR_04810W_A	cluster_2	RPS3	3647299	-2.239	0
C5_05490C_A	cluster_2	HTS1	3636532	-2.255	0
C2_10320C_A	cluster_2	NA	3643944	-2.256	0
C1_05210C_A	cluster_2	NA	3642465	-2.272	0
C7_01390W_A	cluster_2	NA	3645892	-2.282	0
C1_04240C_A	cluster_2	HHF1	3644705	-2.284	0
CR_09110C_A	cluster_2	NA	3641929	-2.291	0
C5_03360W_A	cluster_2	RPO26	3646351	-2.292	0
C1_10200C_A	cluster_2	NA	3634877	-2.3	0
C2_08840W_A	cluster_2	NA	3643891	-2.31	0
C6_01720C_A	cluster_2	SUR7	3641610	-2.328	0
C1_01110C_A	cluster_2	ZPR1	3640177	-2.357	0
C6_00090W_A	cluster_2	NA	3647898	-2.359	0
C1_14080W_A	cluster_2	NA	3643345	-2.364	0
C2_05380W_A	cluster_2	NA	3643432	-2.378	0
C7_02690C_A	cluster_2	EPT1	3647649	-2.381	0
C7_01460C_A	cluster_2	NA	3636958	-2.392	0
C3_00370C_A	cluster_2	BUD21	3640541	-2.393	0
C4_06590W_A	cluster_2	NA	3642778	-2.42	0
C1_09910C_A	cluster_2	NA	3634798	-2.425	0
C4_06370C_A	cluster_2	NA	3642824	-2.444	0
C2_00210W_A	cluster_2	RPL38	30515082	-2.502	0
C5_04880C_A	cluster_2	PUT2	3636439	-2.503	0
C2_09900C_A	cluster_2	TIM23	3643777	-2.515	0
C2_05430C_A	cluster_2	tI(AAU)3	30515122	-2.53	0.002
C3_06100C_A	cluster_2	DED1	3641752	-2.531	0
[truncated: 4,013 more rows]
