# Supplementary material for: ATAC-Seq Identifies Chromatin Landscapes Linked to the Regulation of Oxidative Stress in the Human Fungal Pathogen Candida albicans
Source: J Fungi (Basel). 2020 Sep 21;6(3):182. doi: 10.3390/jof6030182 (PMC7559329; doi:10.3390/jof6030182)
Supplement: Supplementary file 1 [file jof-06-00182-s001.zip › TableS3.xlsx]

## Sheet: legend
Table S3. MACS2 peak calling and edgeR analysis result.
MACS2_peaks
chromosome	chromosome number from C. albicans assembly 22 (A22-s07-m01-r88)
source	result source: MACS2
type	feature type: peak
start	start coordinate of peak
stop	stop coordinate of peak
attributes	peak id
sample	sample in which the peak was called
edgeR_result
peakID	peak id from MACS2 peak calling
geneID	gene id of the next gene downstream of the peak; from C. albicans assembly 22 (A22-s07-m01-r88)
annotation	genomic annotation from called peak
GeneName	gene name annotation from C. albicans assembly 22 (A22-s07-m01-r88)
EntrezID	gene id from the Entrez database
logFC	log2-fold change in peak signal in H2O2 vs YPD grown cells
logCPM	average log2 counts per million (CPM) reads
FDR	false discovery rate

## Sheet: MACS2_peaks
chromosome	source	type	start	stop	attributes	sample
Ca22chr1A_C_albicans_SC5314	macs2	peak	4333	4444	ID=peak_1	wt4_38_S51444
Ca22chr1A_C_albicans_SC5314	macs2	peak	5274	5366	ID=peak_2	wt2_32_S51442,wt2_H2O2_30_S51455,wt3_33_S51443,wt3_H2O2_31_S51454,wt4_38_S51444,wt4_H2O2_39_S51445
Ca22chr1A_C_albicans_SC5314	macs2	peak	6411	6501	ID=peak_3	wt2_32_S51442,wt2_H2O2_30_S51455,wt3_33_S51443,wt3_H2O2_31_S51454
Ca22chr1A_C_albicans_SC5314	macs2	peak	6566	6667	ID=peak_4	wt4_38_S51444,wt4_H2O2_39_S51445
Ca22chr1A_C_albicans_SC5314	macs2	peak	11928	12168	ID=peak_5	wt2_32_S51442,wt2_H2O2_30_S51455,wt3_33_S51443,wt3_H2O2_31_S51454,wt4_38_S51444
Ca22chr1A_C_albicans_SC5314	macs2	peak	13143	13209	ID=peak_6	wt4_38_S51444
Ca22chr1A_C_albicans_SC5314	macs2	peak	13381	13558	ID=peak_7	wt4_38_S51444,wt4_H2O2_39_S51445
Ca22chr1A_C_albicans_SC5314	macs2	peak	13651	13794	ID=peak_8	wt2_32_S51442,wt2_H2O2_30_S51455,wt3_33_S51443,wt3_H2O2_31_S51454,wt4_38_S51444,wt4_H2O2_39_S51445
Ca22chr1A_C_albicans_SC5314	macs2	peak	14390	14498	ID=peak_9	wt4_38_S51444
Ca22chr1A_C_albicans_SC5314	macs2	peak	15674	15771	ID=peak_10	wt2_H2O2_30_S51455,wt3_H2O2_31_S51454,wt4_H2O2_39_S51445
Ca22chr1A_C_albicans_SC5314	macs2	peak	15949	16118	ID=peak_11	wt2_32_S51442,wt2_H2O2_30_S51455,wt3_H2O2_31_S51454,wt4_H2O2_39_S51445
Ca22chr1A_C_albicans_SC5314	macs2	peak	16247	16410	ID=peak_12	wt4_38_S51444,wt4_H2O2_39_S51445
Ca22chr1A_C_albicans_SC5314	macs2	peak	16669	16799	ID=peak_13	wt4_38_S51444,wt4_H2O2_39_S51445
Ca22chr1A_C_albicans_SC5314	macs2	peak	17848	18054	ID=peak_14	wt4_38_S51444,wt4_H2O2_39_S51445
Ca22chr1A_C_albicans_SC5314	macs2	peak	21818	21956	ID=peak_15	wt2_32_S51442
Ca22chr1A_C_albicans_SC5314	macs2	peak	22404	22551	ID=peak_16	wt4_38_S51444,wt4_H2O2_39_S51445
Ca22chr1A_C_albicans_SC5314	macs2	peak	23293	23373	ID=peak_17	wt4_38_S51444
Ca22chr1A_C_albicans_SC5314	macs2	peak	23795	24043	ID=peak_18	wt4_38_S51444,wt4_H2O2_39_S51445
Ca22chr1A_C_albicans_SC5314	macs2	peak	26374	26492	ID=peak_19	wt4_38_S51444
Ca22chr1A_C_albicans_SC5314	macs2	peak	27408	27475	ID=peak_20	wt4_H2O2_39_S51445
Ca22chr1A_C_albicans_SC5314	macs2	peak	27634	27919	ID=peak_21	wt2_32_S51442,wt2_H2O2_30_S51455,wt3_33_S51443,wt3_H2O2_31_S51454,wt4_H2O2_39_S51445
Ca22chr1A_C_albicans_SC5314	macs2	peak	28015	28118	ID=peak_22	wt4_H2O2_39_S51445
Ca22chr1A_C_albicans_SC5314	macs2	peak	28462	28576	ID=peak_23	wt4_38_S51444
Ca22chr1A_C_albicans_SC5314	macs2	peak	29563	29747	ID=peak_24	wt2_32_S51442,wt2_H2O2_30_S51455,wt3_33_S51443,wt3_H2O2_31_S51454,wt4_38_S51444,wt4_H2O2_39_S51445
Ca22chr1A_C_albicans_SC5314	macs2	peak	30838	30937	ID=peak_25	wt4_38_S51444
Ca22chr1A_C_albicans_SC5314	macs2	peak	31019	31101	ID=peak_26	wt4_38_S51444
Ca22chr1A_C_albicans_SC5314	macs2	peak	31533	31781	ID=peak_27	wt2_32_S51442,wt2_H2O2_30_S51455,wt3_33_S51443,wt3_H2O2_31_S51454,wt4_38_S51444,wt4_H2O2_39_S51445
Ca22chr1A_C_albicans_SC5314	macs2	peak	32077	32174	ID=peak_28	wt4_38_S51444
Ca22chr1A_C_albicans_SC5314	macs2	peak	33162	33344	ID=peak_29	wt2_32_S51442,wt3_33_S51443,wt4_38_S51444
Ca22chr1A_C_albicans_SC5314	macs2	peak	33518	33641	ID=peak_30	wt3_33_S51443
Ca22chr1A_C_albicans_SC5314	macs2	peak	33768	34177	ID=peak_31	wt2_32_S51442,wt2_H2O2_30_S51455,wt3_33_S51443,wt3_H2O2_31_S51454,wt4_38_S51444,wt4_H2O2_39_S51445
Ca22chr1A_C_albicans_SC5314	macs2	peak	34809	34931	ID=peak_32	wt4_38_S51444,wt4_H2O2_39_S51445
Ca22chr1A_C_albicans_SC5314	macs2	peak	35131	35198	ID=peak_33	wt4_38_S51444,wt4_H2O2_39_S51445
Ca22chr1A_C_albicans_SC5314	macs2	peak	35633	35902	ID=peak_34	wt2_32_S51442,wt2_H2O2_30_S51455,wt3_33_S51443,wt3_H2O2_31_S51454,wt4_38_S51444,wt4_H2O2_39_S51445
Ca22chr1A_C_albicans_SC5314	macs2	peak	35940	36198	ID=peak_35	wt2_32_S51442,wt2_H2O2_30_S51455,wt3_33_S51443,wt3_H2O2_31_S51454,wt4_38_S51444,wt4_H2O2_39_S51445
Ca22chr1A_C_albicans_SC5314	macs2	peak	36521	37614	ID=peak_36	wt2_32_S51442,wt2_H2O2_30_S51455,wt3_33_S51443,wt3_H2O2_31_S51454,wt4_38_S51444,wt4_H2O2_39_S51445
Ca22chr1A_C_albicans_SC5314	macs2	peak	38012	38145	ID=peak_37	wt4_38_S51444,wt4_H2O2_39_S51445
Ca22chr1A_C_albicans_SC5314	macs2	peak	38820	39020	ID=peak_38	wt4_38_S51444
Ca22chr1A_C_albicans_SC5314	macs2	peak	40680	40775	ID=peak_39	wt4_38_S51444
Ca22chr1A_C_albicans_SC5314	macs2	peak	41858	42235	ID=peak_40	wt2_32_S51442,wt2_H2O2_30_S51455,wt3_33_S51443,wt3_H2O2_31_S51454,wt4_38_S51444,wt4_H2O2_39_S51445
Ca22chr1A_C_albicans_SC5314	macs2	peak	42537	42653	ID=peak_41	wt4_38_S51444,wt4_H2O2_39_S51445
Ca22chr1A_C_albicans_SC5314	macs2	peak	46439	46840	ID=peak_42	wt2_32_S51442,wt2_H2O2_30_S51455,wt3_33_S51443,wt3_H2O2_31_S51454,wt4_38_S51444,wt4_H2O2_39_S51445
Ca22chr1A_C_albicans_SC5314	macs2	peak	47032	47173	ID=peak_43	wt4_38_S51444
Ca22chr1A_C_albicans_SC5314	macs2	peak	48765	48901	ID=peak_44	wt3_33_S51443
Ca22chr1A_C_albicans_SC5314	macs2	peak	49913	49987	ID=peak_45	wt2_H2O2_30_S51455
Ca22chr1A_C_albicans_SC5314	macs2	peak	50447	50561	ID=peak_46	wt4_38_S51444
Ca22chr1A_C_albicans_SC5314	macs2	peak	50618	50690	ID=peak_47	wt4_H2O2_39_S51445
Ca22chr1A_C_albicans_SC5314	macs2	peak	51836	52080	ID=peak_48	wt2_32_S51442,wt2_H2O2_30_S51455,wt3_33_S51443,wt3_H2O2_31_S51454,wt4_38_S51444,wt4_H2O2_39_S51445
Ca22chr1A_C_albicans_SC5314	macs2	peak	52614	52766	ID=peak_49	wt2_32_S51442,wt2_H2O2_30_S51455,wt3_33_S51443,wt3_H2O2_31_S51454,wt4_38_S51444,wt4_H2O2_39_S51445
Ca22chr1A_C_albicans_SC5314	macs2	peak	52831	52939	ID=peak_50	wt4_38_S51444
Ca22chr1A_C_albicans_SC5314	macs2	peak	53070	53141	ID=peak_51	wt3_H2O2_31_S51454
Ca22chr1A_C_albicans_SC5314	macs2	peak	53337	53416	ID=peak_52	wt4_38_S51444,wt4_H2O2_39_S51445
Ca22chr1A_C_albicans_SC5314	macs2	peak	54403	54601	ID=peak_53	wt2_32_S51442,wt2_H2O2_30_S51455,wt3_H2O2_31_S51454
Ca22chr1A_C_albicans_SC5314	macs2	peak	57110	57316	ID=peak_54	wt2_H2O2_30_S51455,wt4_H2O2_39_S51445
Ca22chr1A_C_albicans_SC5314	macs2	peak	57483	57825	ID=peak_55	wt2_32_S51442,wt2_H2O2_30_S51455,wt3_33_S51443,wt3_H2O2_31_S51454,wt4_38_S51444,wt4_H2O2_39_S51445
Ca22chr1A_C_albicans_SC5314	macs2	peak	57830	57898	ID=peak_56	wt4_38_S51444
Ca22chr1A_C_albicans_SC5314	macs2	peak	57969	58107	ID=peak_57	wt2_H2O2_30_S51455,wt3_H2O2_31_S51454
Ca22chr1A_C_albicans_SC5314	macs2	peak	58523	58605	ID=peak_58	wt4_38_S51444
Ca22chr1A_C_albicans_SC5314	macs2	peak	58656	58996	ID=peak_59	wt2_32_S51442,wt2_H2O2_30_S51455,wt3_33_S51443,wt3_H2O2_31_S51454
Ca22chr1A_C_albicans_SC5314	macs2	peak	61594	61698	ID=peak_60	wt4_38_S51444
Ca22chr1A_C_albicans_SC5314	macs2	peak	62690	63099	ID=peak_61	wt2_32_S51442,wt2_H2O2_30_S51455,wt3_33_S51443,wt3_H2O2_31_S51454,wt4_38_S51444,wt4_H2O2_39_S51445
Ca22chr1A_C_albicans_SC5314	macs2	peak	66778	66863	ID=peak_62	wt2_32_S51442,wt2_H2O2_30_S51455
Ca22chr1A_C_albicans_SC5314	macs2	peak	67015	67269	ID=peak_63	wt2_H2O2_30_S51455,wt3_H2O2_31_S51454,wt4_38_S51444,wt4_H2O2_39_S51445
Ca22chr1A_C_albicans_SC5314	macs2	peak	67688	67798	ID=peak_64	wt2_32_S51442,wt2_H2O2_30_S51455,wt3_H2O2_31_S51454
Ca22chr1A_C_albicans_SC5314	macs2	peak	68905	69203	ID=peak_65	wt2_32_S51442,wt2_H2O2_30_S51455,wt3_33_S51443,wt3_H2O2_31_S51454,wt4_H2O2_39_S51445
Ca22chr1A_C_albicans_SC5314	macs2	peak	69747	69825	ID=peak_66	wt4_38_S51444
Ca22chr1A_C_albicans_SC5314	macs2	peak	70750	71018	ID=peak_67	wt2_32_S51442,wt2_H2O2_30_S51455,wt3_33_S51443,wt3_H2O2_31_S51454,wt4_38_S51444,wt4_H2O2_39_S51445
Ca22chr1A_C_albicans_SC5314	macs2	peak	73397	73523	ID=peak_68	wt2_32_S51442,wt2_H2O2_30_S51455,wt3_33_S51443
Ca22chr1A_C_albicans_SC5314	macs2	peak	73608	73779	ID=peak_69	wt4_38_S51444,wt4_H2O2_39_S51445
Ca22chr1A_C_albicans_SC5314	macs2	peak	75470	75587	ID=peak_70	wt2_32_S51442,wt2_H2O2_30_S51455,wt3_33_S51443,wt3_H2O2_31_S51454
Ca22chr1A_C_albicans_SC5314	macs2	peak	78297	78839	ID=peak_71	wt2_32_S51442,wt2_H2O2_30_S51455,wt3_33_S51443,wt3_H2O2_31_S51454,wt4_H2O2_39_S51445
Ca22chr1A_C_albicans_SC5314	macs2	peak	79702	80084	ID=peak_72	wt2_32_S51442,wt2_H2O2_30_S51455,wt3_33_S51443,wt3_H2O2_31_S51454
Ca22chr1A_C_albicans_SC5314	macs2	peak	81546	81620	ID=peak_73	wt4_38_S51444
Ca22chr1A_C_albicans_SC5314	macs2	peak	81955	82041	ID=peak_74	wt3_H2O2_31_S51454
Ca22chr1A_C_albicans_SC5314	macs2	peak	83833	83904	ID=peak_75	wt4_38_S51444
Ca22chr1A_C_albicans_SC5314	macs2	peak	84693	84961	ID=peak_76	wt2_32_S51442,wt2_H2O2_30_S51455,wt3_33_S51443,wt3_H2O2_31_S51454,wt4_H2O2_39_S51445
Ca22chr1A_C_albicans_SC5314	macs2	peak	87403	87806	ID=peak_77	wt2_32_S51442,wt2_H2O2_30_S51455,wt3_33_S51443,wt3_H2O2_31_S51454,wt4_38_S51444,wt4_H2O2_39_S51445
Ca22chr1A_C_albicans_SC5314	macs2	peak	89932	90030	ID=peak_78	wt2_32_S51442,wt2_H2O2_30_S51455,wt3_33_S51443
Ca22chr1A_C_albicans_SC5314	macs2	peak	92395	92521	ID=peak_79	wt4_38_S51444
Ca22chr1A_C_albicans_SC5314	macs2	peak	93795	93907	ID=peak_80	wt2_32_S51442,wt2_H2O2_30_S51455,wt3_33_S51443,wt3_H2O2_31_S51454
Ca22chr1A_C_albicans_SC5314	macs2	peak	94955	95073	ID=peak_81	wt2_32_S51442,wt2_H2O2_30_S51455,wt3_33_S51443,wt3_H2O2_31_S51454,wt4_38_S51444,wt4_H2O2_39_S51445
Ca22chr1A_C_albicans_SC5314	macs2	peak	100645	100744	ID=peak_82	wt4_38_S51444
Ca22chr1A_C_albicans_SC5314	macs2	peak	101530	101686	ID=peak_83	wt2_32_S51442,wt2_H2O2_30_S51455,wt3_33_S51443,wt3_H2O2_31_S51454,wt4_38_S51444,wt4_H2O2_39_S51445
Ca22chr1A_C_albicans_SC5314	macs2	peak	103639	103820	ID=peak_84	wt2_32_S51442,wt2_H2O2_30_S51455,wt3_33_S51443,wt3_H2O2_31_S51454,wt4_38_S51444,wt4_H2O2_39_S51445
Ca22chr1A_C_albicans_SC5314	macs2	peak	111200	111353	ID=peak_85	wt2_32_S51442,wt2_H2O2_30_S51455,wt3_H2O2_31_S51454
Ca22chr1A_C_albicans_SC5314	macs2	peak	112597	112731	ID=peak_86	wt2_32_S51442,wt2_H2O2_30_S51455,wt3_33_S51443,wt3_H2O2_31_S51454,wt4_H2O2_39_S51445
Ca22chr1A_C_albicans_SC5314	macs2	peak	113906	114037	ID=peak_87	wt2_32_S51442,wt2_H2O2_30_S51455,wt3_H2O2_31_S51454
Ca22chr1A_C_albicans_SC5314	macs2	peak	114633	114751	ID=peak_88	wt4_H2O2_39_S51445
Ca22chr1A_C_albicans_SC5314	macs2	peak	115993	116182	ID=peak_89	wt2_32_S51442,wt2_H2O2_30_S51455,wt3_33_S51443,wt3_H2O2_31_S51454
Ca22chr1A_C_albicans_SC5314	macs2	peak	119599	119689	ID=peak_90	wt2_32_S51442,wt2_H2O2_30_S51455,wt3_33_S51443,wt3_H2O2_31_S51454
Ca22chr1A_C_albicans_SC5314	macs2	peak	122831	122950	ID=peak_91	wt2_32_S51442,wt2_H2O2_30_S51455,wt3_33_S51443,wt3_H2O2_31_S51454
Ca22chr1A_C_albicans_SC5314	macs2	peak	125773	125909	ID=peak_92	wt2_32_S51442,wt2_H2O2_30_S51455,wt3_33_S51443,wt3_H2O2_31_S51454
Ca22chr1A_C_albicans_SC5314	macs2	peak	126428	126725	ID=peak_93	wt2_32_S51442,wt2_H2O2_30_S51455,wt3_33_S51443,wt3_H2O2_31_S51454,wt4_38_S51444,wt4_H2O2_39_S51445
Ca22chr1A_C_albicans_SC5314	macs2	peak	128969	129187	ID=peak_94	wt2_32_S51442,wt2_H2O2_30_S51455,wt3_33_S51443,wt3_H2O2_31_S51454
Ca22chr1A_C_albicans_SC5314	macs2	peak	131125	131317	ID=peak_95	wt2_32_S51442,wt2_H2O2_30_S51455,wt3_H2O2_31_S51454
Ca22chr1A_C_albicans_SC5314	macs2	peak	134083	134270	ID=peak_96	wt2_32_S51442,wt2_H2O2_30_S51455,wt3_33_S51443,wt3_H2O2_31_S51454,wt4_38_S51444,wt4_H2O2_39_S51445
Ca22chr1A_C_albicans_SC5314	macs2	peak	134978	135216	ID=peak_97	wt2_32_S51442,wt2_H2O2_30_S51455,wt3_33_S51443,wt3_H2O2_31_S51454,wt4_38_S51444,wt4_H2O2_39_S51445
Ca22chr1A_C_albicans_SC5314	macs2	peak	136807	136950	ID=peak_98	wt2_32_S51442,wt2_H2O2_30_S51455,wt3_33_S51443,wt4_H2O2_39_S51445
Ca22chr1A_C_albicans_SC5314	macs2	peak	137174	137434	ID=peak_99	wt2_32_S51442,wt2_H2O2_30_S51455,wt3_33_S51443,wt3_H2O2_31_S51454,wt4_38_S51444,wt4_H2O2_39_S51445
Ca22chr1A_C_albicans_SC5314	macs2	peak	141155	141342	ID=peak_100	wt2_32_S51442,wt2_H2O2_30_S51455,wt3_33_S51443,wt3_H2O2_31_S51454,wt4_H2O2_39_S51445
Ca22chr1A_C_albicans_SC5314	macs2	peak	141946	142421	ID=peak_101	wt2_32_S51442,wt2_H2O2_30_S51455,wt3_33_S51443,wt3_H2O2_31_S51454,wt4_38_S51444,wt4_H2O2_39_S51445
Ca22chr1A_C_albicans_SC5314	macs2	peak	142593	142698	ID=peak_102	wt2_32_S51442,wt3_33_S51443
Ca22chr1A_C_albicans_SC5314	macs2	peak	142801	142997	ID=peak_103	wt2_32_S51442,wt2_H2O2_30_S51455,wt3_33_S51443,wt3_H2O2_31_S51454,wt4_H2O2_39_S51445
Ca22chr1A_C_albicans_SC5314	macs2	peak	143490	143568	ID=peak_104	wt4_H2O2_39_S51445
Ca22chr1A_C_albicans_SC5314	macs2	peak	143659	143734	ID=peak_105	wt2_32_S51442
Ca22chr1A_C_albicans_SC5314	macs2	peak	146569	146660	ID=peak_106	wt4_38_S51444
Ca22chr1A_C_albicans_SC5314	macs2	peak	147308	147726	ID=peak_107	wt2_32_S51442,wt2_H2O2_30_S51455,wt3_33_S51443,wt3_H2O2_31_S51454,wt4_38_S51444
Ca22chr1A_C_albicans_SC5314	macs2	peak	148094	148225	ID=peak_108	wt2_32_S51442
Ca22chr1A_C_albicans_SC5314	macs2	peak	150344	150451	ID=peak_109	wt2_32_S51442,wt3_33_S51443
Ca22chr1A_C_albicans_SC5314	macs2	peak	151929	152062	ID=peak_110	wt3_33_S51443,wt4_H2O2_39_S51445
Ca22chr1A_C_albicans_SC5314	macs2	peak	153851	154010	ID=peak_111	wt2_32_S51442,wt2_H2O2_30_S51455,wt3_33_S51443,wt3_H2O2_31_S51454,wt4_38_S51444,wt4_H2O2_39_S51445
Ca22chr1A_C_albicans_SC5314	macs2	peak	163154	163697	ID=peak_112	wt2_32_S51442,wt2_H2O2_30_S51455,wt3_33_S51443,wt3_H2O2_31_S51454,wt4_38_S51444,wt4_H2O2_39_S51445
Ca22chr1A_C_albicans_SC5314	macs2	peak	163926	164230	ID=peak_113	wt2_32_S51442,wt2_H2O2_30_S51455,wt3_33_S51443,wt3_H2O2_31_S51454,wt4_38_S51444,wt4_H2O2_39_S51445
Ca22chr1A_C_albicans_SC5314	macs2	peak	164666	164737	ID=peak_114	wt2_32_S51442
Ca22chr1A_C_albicans_SC5314	macs2	peak	165017	165486	ID=peak_115	wt2_32_S51442,wt2_H2O2_30_S51455,wt3_33_S51443,wt3_H2O2_31_S51454,wt4_38_S51444,wt4_H2O2_39_S51445
Ca22chr1A_C_albicans_SC5314	macs2	peak	166269	166398	ID=peak_116	wt2_32_S51442,wt3_33_S51443
Ca22chr1A_C_albicans_SC5314	macs2	peak	168210	168375	ID=peak_117	wt2_32_S51442,wt2_H2O2_30_S51455,wt3_33_S51443,wt3_H2O2_31_S51454,wt4_38_S51444,wt4_H2O2_39_S51445
Ca22chr1A_C_albicans_SC5314	macs2	peak	172525	172691	ID=peak_118	wt2_32_S51442,wt2_H2O2_30_S51455,wt3_33_S51443,wt3_H2O2_31_S51454,wt4_H2O2_39_S51445
Ca22chr1A_C_albicans_SC5314	macs2	peak	172989	173113	ID=peak_119	wt4_38_S51444
Ca22chr1A_C_albicans_SC5314	macs2	peak	173196	173462	ID=peak_120	wt2_32_S51442,wt2_H2O2_30_S51455,wt3_33_S51443,wt3_H2O2_31_S51454,wt4_38_S51444,wt4_H2O2_39_S51445
Ca22chr1A_C_albicans_SC5314	macs2	peak	173598	173877	ID=peak_121	wt2_32_S51442,wt2_H2O2_30_S51455,wt3_33_S51443,wt3_H2O2_31_S51454,wt4_38_S51444,wt4_H2O2_39_S51445
Ca22chr1A_C_albicans_SC5314	macs2	peak	174800	174867	ID=peak_122	wt4_38_S51444
Ca22chr1A_C_albicans_SC5314	macs2	peak	175889	176011	ID=peak_123	wt2_32_S51442,wt3_33_S51443,wt3_H2O2_31_S51454,wt4_38_S51444,wt4_H2O2_39_S51445
Ca22chr1A_C_albicans_SC5314	macs2	peak	176172	176255	ID=peak_124	wt2_32_S51442
Ca22chr1A_C_albicans_SC5314	macs2	peak	178482	178605	ID=peak_125	wt2_32_S51442,wt2_H2O2_30_S51455,wt3_33_S51443,wt3_H2O2_31_S51454,wt4_H2O2_39_S51445
Ca22chr1A_C_albicans_SC5314	macs2	peak	179436	179664	ID=peak_126	wt2_32_S51442,wt2_H2O2_30_S51455,wt3_33_S51443,wt3_H2O2_31_S51454,wt4_38_S51444,wt4_H2O2_39_S51445
Ca22chr1A_C_albicans_SC5314	macs2	peak	181092	181231	ID=peak_127	wt2_32_S51442,wt2_H2O2_30_S51455,wt3_33_S51443,wt3_H2O2_31_S51454
Ca22chr1A_C_albicans_SC5314	macs2	peak	189169	189356	ID=peak_128	wt2_32_S51442,wt2_H2O2_30_S51455,wt3_33_S51443,wt3_H2O2_31_S51454,wt4_H2O2_39_S51445
Ca22chr1A_C_albicans_SC5314	macs2	peak	190371	190623	ID=peak_129	wt2_32_S51442,wt2_H2O2_30_S51455,wt3_33_S51443,wt3_H2O2_31_S51454,wt4_38_S51444,wt4_H2O2_39_S51445
Ca22chr1A_C_albicans_SC5314	macs2	peak	193819	194146	ID=peak_130	wt2_32_S51442,wt2_H2O2_30_S51455,wt3_33_S51443,wt3_H2O2_31_S51454,wt4_H2O2_39_S51445
Ca22chr1A_C_albicans_SC5314	macs2	peak	198036	198117	ID=peak_131	wt2_H2O2_30_S51455,wt3_H2O2_31_S51454
Ca22chr1A_C_albicans_SC5314	macs2	peak	198769	198904	ID=peak_132	wt2_32_S51442,wt2_H2O2_30_S51455,wt3_33_S51443,wt3_H2O2_31_S51454
Ca22chr1A_C_albicans_SC5314	macs2	peak	201881	201992	ID=peak_133	wt4_38_S51444
Ca22chr1A_C_albicans_SC5314	macs2	peak	202364	202460	ID=peak_134	wt2_32_S51442,wt2_H2O2_30_S51455,wt3_H2O2_31_S51454
Ca22chr1A_C_albicans_SC5314	macs2	peak	203701	203899	ID=peak_135	wt2_32_S51442,wt2_H2O2_30_S51455,wt3_33_S51443,wt3_H2O2_31_S51454
Ca22chr1A_C_albicans_SC5314	macs2	peak	205017	205192	ID=peak_136	wt2_32_S51442,wt2_H2O2_30_S51455,wt3_33_S51443,wt3_H2O2_31_S51454,wt4_38_S51444,wt4_H2O2_39_S51445
Ca22chr1A_C_albicans_SC5314	macs2	peak	205299	205454	ID=peak_137	wt2_32_S51442,wt3_33_S51443
Ca22chr1A_C_albicans_SC5314	macs2	peak	206371	206461	ID=peak_138	wt3_H2O2_31_S51454
Ca22chr1A_C_albicans_SC5314	macs2	peak	206556	206651	ID=peak_139	wt4_38_S51444
Ca22chr1A_C_albicans_SC5314	macs2	peak	206774	206841	ID=peak_140	wt4_38_S51444
Ca22chr1A_C_albicans_SC5314	macs2	peak	207943	208240	ID=peak_141	wt2_32_S51442,wt2_H2O2_30_S51455,wt3_33_S51443,wt3_H2O2_31_S51454
Ca22chr1A_C_albicans_SC5314	macs2	peak	209103	209200	ID=peak_142	wt2_H2O2_30_S51455,wt4_H2O2_39_S51445
Ca22chr1A_C_albicans_SC5314	macs2	peak	210624	210824	ID=peak_143	wt2_32_S51442,wt2_H2O2_30_S51455,wt3_33_S51443,wt3_H2O2_31_S51454,wt4_H2O2_39_S51445
Ca22chr1A_C_albicans_SC5314	macs2	peak	212778	212907	ID=peak_144	wt2_32_S51442,wt2_H2O2_30_S51455
Ca22chr1A_C_albicans_SC5314	macs2	peak	213008	213114	ID=peak_145	wt2_32_S51442,wt2_H2O2_30_S51455,wt3_H2O2_31_S51454
Ca22chr1A_C_albicans_SC5314	macs2	peak	213238	213384	ID=peak_146	wt2_32_S51442,wt2_H2O2_30_S51455,wt3_33_S51443,wt3_H2O2_31_S51454,wt4_38_S51444,wt4_H2O2_39_S51445
Ca22chr1A_C_albicans_SC5314	macs2	peak	222074	222212	ID=peak_147	wt2_32_S51442,wt2_H2O2_30_S51455,wt3_H2O2_31_S51454
Ca22chr1A_C_albicans_SC5314	macs2	peak	222458	222843	ID=peak_148	wt2_32_S51442,wt2_H2O2_30_S51455,wt3_33_S51443,wt3_H2O2_31_S51454,wt4_38_S51444,wt4_H2O2_39_S51445
Ca22chr1A_C_albicans_SC5314	macs2	peak	223372	223655	ID=peak_149	wt2_32_S51442,wt2_H2O2_30_S51455,wt3_33_S51443,wt3_H2O2_31_S51454,wt4_38_S51444,wt4_H2O2_39_S51445
Ca22chr1A_C_albicans_SC5314	macs2	peak	223868	224334	ID=peak_150	wt2_32_S51442,wt2_H2O2_30_S51455,wt3_33_S51443,wt3_H2O2_31_S51454,wt4_H2O2_39_S51445
Ca22chr1A_C_albicans_SC5314	macs2	peak	224808	224883	ID=peak_151	wt4_38_S51444
Ca22chr1A_C_albicans_SC5314	macs2	peak	226167	226266	ID=peak_152	wt4_H2O2_39_S51445
Ca22chr1A_C_albicans_SC5314	macs2	peak	226646	226716	ID=peak_153	wt2_H2O2_30_S51455
Ca22chr1A_C_albicans_SC5314	macs2	peak	227120	227341	ID=peak_154	wt2_H2O2_30_S51455,wt3_H2O2_31_S51454
Ca22chr1A_C_albicans_SC5314	macs2	peak	227533	227838	ID=peak_155	wt2_H2O2_30_S51455,wt3_H2O2_31_S51454
Ca22chr1A_C_albicans_SC5314	macs2	peak	227985	228095	ID=peak_156	wt2_H2O2_30_S51455
Ca22chr1A_C_albicans_SC5314	macs2	peak	228384	228602	ID=peak_157	wt2_H2O2_30_S51455,wt3_H2O2_31_S51454
Ca22chr1A_C_albicans_SC5314	macs2	peak	228707	228776	ID=peak_158	wt3_H2O2_31_S51454
Ca22chr1A_C_albicans_SC5314	macs2	peak	230227	233022	ID=peak_159	wt2_32_S51442,wt2_H2O2_30_S51455,wt3_33_S51443,wt3_H2O2_31_S51454,wt4_38_S51444,wt4_H2O2_39_S51445
Ca22chr1A_C_albicans_SC5314	macs2	peak	233410	233499	ID=peak_160	wt4_H2O2_39_S51445
Ca22chr1A_C_albicans_SC5314	macs2	peak	238468	238698	ID=peak_161	wt2_32_S51442,wt2_H2O2_30_S51455,wt3_33_S51443,wt3_H2O2_31_S51454,wt4_H2O2_39_S51445
Ca22chr1A_C_albicans_SC5314	macs2	peak	242546	242653	ID=peak_162	wt2_32_S51442,wt2_H2O2_30_S51455,wt3_33_S51443,wt3_H2O2_31_S51454,wt4_H2O2_39_S51445
Ca22chr1A_C_albicans_SC5314	macs2	peak	245039	245146	ID=peak_163	wt2_32_S51442,wt2_H2O2_30_S51455,wt3_33_S51443,wt3_H2O2_31_S51454,wt4_38_S51444,wt4_H2O2_39_S51445
Ca22chr1A_C_albicans_SC5314	macs2	peak	247712	247839	ID=peak_164	wt2_32_S51442,wt2_H2O2_30_S51455,wt3_33_S51443,wt3_H2O2_31_S51454,wt4_H2O2_39_S51445
Ca22chr1A_C_albicans_SC5314	macs2	peak	248349	248761	ID=peak_165	wt2_32_S51442,wt2_H2O2_30_S51455,wt3_33_S51443,wt3_H2O2_31_S51454,wt4_38_S51444,wt4_H2O2_39_S51445
Ca22chr1A_C_albicans_SC5314	macs2	peak	249937	250005	ID=peak_166	wt2_H2O2_30_S51455
Ca22chr1A_C_albicans_SC5314	macs2	peak	252555	252935	ID=peak_167	wt2_32_S51442,wt2_H2O2_30_S51455,wt3_33_S51443,wt3_H2O2_31_S51454,wt4_38_S51444,wt4_H2O2_39_S51445
Ca22chr1A_C_albicans_SC5314	macs2	peak	255016	255100	ID=peak_168	wt2_H2O2_30_S51455,wt3_H2O2_31_S51454
Ca22chr1A_C_albicans_SC5314	macs2	peak	257688	257890	ID=peak_169	wt2_32_S51442,wt2_H2O2_30_S51455,wt3_33_S51443,wt3_H2O2_31_S51454,wt4_38_S51444,wt4_H2O2_39_S51445
Ca22chr1A_C_albicans_SC5314	macs2	peak	258360	258432	ID=peak_170	wt4_38_S51444
Ca22chr1A_C_albicans_SC5314	macs2	peak	258918	259345	ID=peak_171	wt2_32_S51442,wt2_H2O2_30_S51455,wt3_33_S51443,wt3_H2O2_31_S51454,wt4_38_S51444,wt4_H2O2_39_S51445
Ca22chr1A_C_albicans_SC5314	macs2	peak	264789	265017	ID=peak_172	wt2_32_S51442,wt2_H2O2_30_S51455,wt3_33_S51443,wt3_H2O2_31_S51454,wt4_H2O2_39_S51445
Ca22chr1A_C_albicans_SC5314	macs2	peak	267832	268243	ID=peak_173	wt2_32_S51442,wt2_H2O2_30_S51455,wt3_33_S51443,wt3_H2O2_31_S51454,wt4_38_S51444,wt4_H2O2_39_S51445
Ca22chr1A_C_albicans_SC5314	macs2	peak	268701	268976	ID=peak_174	wt2_32_S51442,wt2_H2O2_30_S51455,wt3_33_S51443,wt3_H2O2_31_S51454,wt4_H2O2_39_S51445
Ca22chr1A_C_albicans_SC5314	macs2	peak	270050	270294	ID=peak_175	wt2_32_S51442,wt2_H2O2_30_S51455,wt3_33_S51443,wt3_H2O2_31_S51454,wt4_38_S51444
Ca22chr1A_C_albicans_SC5314	macs2	peak	272126	272468	ID=peak_176	wt2_32_S51442,wt2_H2O2_30_S51455,wt3_33_S51443,wt3_H2O2_31_S51454,wt4_38_S51444,wt4_H2O2_39_S51445
Ca22chr1A_C_albicans_SC5314	macs2	peak	275032	275335	ID=peak_177	wt2_32_S51442,wt2_H2O2_30_S51455,wt3_33_S51443,wt3_H2O2_31_S51454,wt4_38_S51444,wt4_H2O2_39_S51445
Ca22chr1A_C_albicans_SC5314	macs2	peak	276884	277018	ID=peak_178	wt4_H2O2_39_S51445
Ca22chr1A_C_albicans_SC5314	macs2	peak	277417	277628	ID=peak_179	wt2_32_S51442,wt2_H2O2_30_S51455,wt3_33_S51443,wt3_H2O2_31_S51454,wt4_38_S51444,wt4_H2O2_39_S51445
Ca22chr1A_C_albicans_SC5314	macs2	peak	279398	279582	ID=peak_180	wt2_32_S51442,wt2_H2O2_30_S51455,wt3_33_S51443,wt3_H2O2_31_S51454,wt4_38_S51444
Ca22chr1A_C_albicans_SC5314	macs2	peak	280035	280109	ID=peak_181	wt3_H2O2_31_S51454
Ca22chr1A_C_albicans_SC5314	macs2	peak	281625	282307	ID=peak_182	wt2_32_S51442,wt2_H2O2_30_S51455,wt3_33_S51443,wt3_H2O2_31_S51454,wt4_38_S51444,wt4_H2O2_39_S51445
Ca22chr1A_C_albicans_SC5314	macs2	peak	284420	284534	ID=peak_183	wt2_32_S51442,wt2_H2O2_30_S51455,wt3_33_S51443,wt3_H2O2_31_S51454,wt4_H2O2_39_S51445
Ca22chr1A_C_albicans_SC5314	macs2	peak	287776	287950	ID=peak_184	wt2_32_S51442,wt2_H2O2_30_S51455,wt3_33_S51443,wt3_H2O2_31_S51454,wt4_H2O2_39_S51445
Ca22chr1A_C_albicans_SC5314	macs2	peak	290557	290750	ID=peak_185	wt2_32_S51442,wt2_H2O2_30_S51455,wt3_33_S51443,wt3_H2O2_31_S51454,wt4_H2O2_39_S51445
Ca22chr1A_C_albicans_SC5314	macs2	peak	291038	291280	ID=peak_186	wt2_32_S51442,wt2_H2O2_30_S51455,wt3_33_S51443,wt3_H2O2_31_S51454,wt4_38_S51444,wt4_H2O2_39_S51445
Ca22chr1A_C_albicans_SC5314	macs2	peak	291409	291664	ID=peak_187	wt2_32_S51442,wt2_H2O2_30_S51455,wt3_33_S51443,wt3_H2O2_31_S51454,wt4_38_S51444,wt4_H2O2_39_S51445
Ca22chr1A_C_albicans_SC5314	macs2	peak	293133	293223	ID=peak_188	wt2_H2O2_30_S51455
Ca22chr1A_C_albicans_SC5314	macs2	peak	293556	294446	ID=peak_189	wt2_32_S51442,wt2_H2O2_30_S51455,wt3_33_S51443,wt3_H2O2_31_S51454,wt4_38_S51444,wt4_H2O2_39_S51445
Ca22chr1A_C_albicans_SC5314	macs2	peak	295785	296012	ID=peak_190	wt2_32_S51442,wt2_H2O2_30_S51455,wt3_33_S51443,wt3_H2O2_31_S51454,wt4_38_S51444
Ca22chr1A_C_albicans_SC5314	macs2	peak	297644	297807	ID=peak_191	wt2_32_S51442,wt2_H2O2_30_S51455
Ca22chr1A_C_albicans_SC5314	macs2	peak	298186	298313	ID=peak_192	wt2_32_S51442,wt2_H2O2_30_S51455,wt3_33_S51443,wt3_H2O2_31_S51454
Ca22chr1A_C_albicans_SC5314	macs2	peak	298533	299422	ID=peak_193	wt2_32_S51442,wt2_H2O2_30_S51455,wt3_33_S51443,wt3_H2O2_31_S51454,wt4_38_S51444,wt4_H2O2_39_S51445
Ca22chr1A_C_albicans_SC5314	macs2	peak	301031	301137	ID=peak_194	wt4_38_S51444
Ca22chr1A_C_albicans_SC5314	macs2	peak	301426	301510	ID=peak_195	wt4_38_S51444
Ca22chr1A_C_albicans_SC5314	macs2	peak	301894	302118	ID=peak_196	wt2_32_S51442,wt2_H2O2_30_S51455,wt3_33_S51443,wt3_H2O2_31_S51454,wt4_38_S51444
Ca22chr1A_C_albicans_SC5314	macs2	peak	302248	302937	ID=peak_197	wt2_32_S51442,wt2_H2O2_30_S51455,wt3_33_S51443,wt3_H2O2_31_S51454,wt4_38_S51444,wt4_H2O2_39_S51445
Ca22chr1A_C_albicans_SC5314	macs2	peak	304650	304789	ID=peak_198	wt2_H2O2_30_S51455,wt3_H2O2_31_S51454,wt4_H2O2_39_S51445
Ca22chr1A_C_albicans_SC5314	macs2	peak	306131	306658	ID=peak_199	wt2_32_S51442,wt2_H2O2_30_S51455,wt3_33_S51443,wt3_H2O2_31_S51454,wt4_H2O2_39_S51445
Ca22chr1A_C_albicans_SC5314	macs2	peak	306808	307008	ID=peak_200	wt2_H2O2_30_S51455,wt4_H2O2_39_S51445
Ca22chr1A_C_albicans_SC5314	macs2	peak	308564	308829	ID=peak_201	wt2_32_S51442,wt2_H2O2_30_S51455,wt3_33_S51443,wt3_H2O2_31_S51454,wt4_38_S51444,wt4_H2O2_39_S51445
Ca22chr1A_C_albicans_SC5314	macs2	peak	308971	309101	ID=peak_202	wt2_32_S51442,wt2_H2O2_30_S51455,wt3_33_S51443,wt3_H2O2_31_S51454,wt4_38_S51444,wt4_H2O2_39_S51445
Ca22chr1A_C_albicans_SC5314	macs2	peak	310987	311128	ID=peak_203	wt2_H2O2_30_S51455,wt3_H2O2_31_S51454
Ca22chr1A_C_albicans_SC5314	macs2	peak	323451	323603	ID=peak_204	wt2_32_S51442,wt2_H2O2_30_S51455,wt3_33_S51443,wt3_H2O2_31_S51454
Ca22chr1A_C_albicans_SC5314	macs2	peak	326098	326226	ID=peak_205	wt2_32_S51442,wt2_H2O2_30_S51455,wt3_33_S51443
Ca22chr1A_C_albicans_SC5314	macs2	peak	328798	328933	ID=peak_206	wt2_32_S51442,wt2_H2O2_30_S51455,wt3_33_S51443,wt3_H2O2_31_S51454,wt4_38_S51444,wt4_H2O2_39_S51445
Ca22chr1A_C_albicans_SC5314	macs2	peak	329947	330116	ID=peak_207	wt2_32_S51442,wt3_H2O2_31_S51454
Ca22chr1A_C_albicans_SC5314	macs2	peak	330980	331130	ID=peak_208	wt2_32_S51442,wt2_H2O2_30_S51455,wt3_33_S51443,wt3_H2O2_31_S51454,wt4_H2O2_39_S51445
Ca22chr1A_C_albicans_SC5314	macs2	peak	332361	332606	ID=peak_209	wt2_32_S51442,wt2_H2O2_30_S51455,wt3_33_S51443,wt3_H2O2_31_S51454,wt4_H2O2_39_S51445
Ca22chr1A_C_albicans_SC5314	macs2	peak	334253	334457	ID=peak_210	wt2_32_S51442,wt2_H2O2_30_S51455,wt3_33_S51443,wt3_H2O2_31_S51454,wt4_38_S51444,wt4_H2O2_39_S51445
Ca22chr1A_C_albicans_SC5314	macs2	peak	335947	336238	ID=peak_211	wt2_32_S51442,wt2_H2O2_30_S51455,wt3_33_S51443,wt3_H2O2_31_S51454
Ca22chr1A_C_albicans_SC5314	macs2	peak	341605	341709	ID=peak_212	wt2_32_S51442
Ca22chr1A_C_albicans_SC5314	macs2	peak	342553	342643	ID=peak_213	wt2_32_S51442,wt2_H2O2_30_S51455
Ca22chr1A_C_albicans_SC5314	macs2	peak	343618	343693	ID=peak_214	wt4_H2O2_39_S51445
Ca22chr1A_C_albicans_SC5314	macs2	peak	344014	344322	ID=peak_215	wt2_32_S51442,wt2_H2O2_30_S51455,wt3_33_S51443,wt3_H2O2_31_S51454,wt4_H2O2_39_S51445
Ca22chr1A_C_albicans_SC5314	macs2	peak	344380	344944	ID=peak_216	wt2_32_S51442,wt2_H2O2_30_S51455,wt3_33_S51443,wt3_H2O2_31_S51454,wt4_38_S51444,wt4_H2O2_39_S51445
Ca22chr1A_C_albicans_SC5314	macs2	peak	345507	345604	ID=peak_217	wt2_32_S51442,wt2_H2O2_30_S51455,wt3_H2O2_31_S51454
Ca22chr1A_C_albicans_SC5314	macs2	peak	348908	349162	ID=peak_218	wt2_32_S51442,wt2_H2O2_30_S51455,wt3_33_S51443,wt3_H2O2_31_S51454,wt4_38_S51444,wt4_H2O2_39_S51445
Ca22chr1A_C_albicans_SC5314	macs2	peak	349291	349957	ID=peak_219	wt2_32_S51442,wt2_H2O2_30_S51455,wt3_33_S51443,wt3_H2O2_31_S51454,wt4_38_S51444,wt4_H2O2_39_S51445
Ca22chr1A_C_albicans_SC5314	macs2	peak	350161	350399	ID=peak_220	wt2_32_S51442,wt2_H2O2_30_S51455,wt3_33_S51443,wt3_H2O2_31_S51454,wt4_38_S51444,wt4_H2O2_39_S51445
Ca22chr1A_C_albicans_SC5314	macs2	peak	350472	350889	ID=peak_221	wt2_32_S51442,wt2_H2O2_30_S51455,wt3_33_S51443,wt3_H2O2_31_S51454,wt4_38_S51444,wt4_H2O2_39_S51445
Ca22chr1A_C_albicans_SC5314	macs2	peak	353858	354053	ID=peak_222	wt2_32_S51442,wt2_H2O2_30_S51455,wt3_33_S51443,wt3_H2O2_31_S51454,wt4_38_S51444
Ca22chr1A_C_albicans_SC5314	macs2	peak	354262	354367	ID=peak_223	wt2_32_S51442,wt3_33_S51443
Ca22chr1A_C_albicans_SC5314	macs2	peak	354503	354713	ID=peak_224	wt2_32_S51442,wt2_H2O2_30_S51455,wt3_H2O2_31_S51454
Ca22chr1A_C_albicans_SC5314	macs2	peak	355667	355832	ID=peak_225	wt2_32_S51442,wt2_H2O2_30_S51455,wt3_33_S51443,wt3_H2O2_31_S51454,wt4_38_S51444
Ca22chr1A_C_albicans_SC5314	macs2	peak	356362	356618	ID=peak_226	wt2_32_S51442,wt2_H2O2_30_S51455,wt3_33_S51443,wt3_H2O2_31_S51454,wt4_38_S51444,wt4_H2O2_39_S51445
Ca22chr1A_C_albicans_SC5314	macs2	peak	360176	360311	ID=peak_227	wt2_32_S51442,wt2_H2O2_30_S51455,wt3_33_S51443,wt3_H2O2_31_S51454,wt4_38_S51444
Ca22chr1A_C_albicans_SC5314	macs2	peak	360616	360745	ID=peak_228	wt2_32_S51442,wt2_H2O2_30_S51455,wt3_33_S51443,wt3_H2O2_31_S51454,wt4_H2O2_39_S51445
Ca22chr1A_C_albicans_SC5314	macs2	peak	361380	361459	ID=peak_229	wt4_38_S51444
Ca22chr1A_C_albicans_SC5314	macs2	peak	366454	366597	ID=peak_230	wt2_32_S51442,wt2_H2O2_30_S51455,wt3_33_S51443,wt3_H2O2_31_S51454,wt4_H2O2_39_S51445
Ca22chr1A_C_albicans_SC5314	macs2	peak	370055	370509	ID=peak_231	wt2_32_S51442,wt2_H2O2_30_S51455,wt3_33_S51443,wt3_H2O2_31_S51454
Ca22chr1A_C_albicans_SC5314	macs2	peak	370640	370950	ID=peak_232	wt2_32_S51442,wt2_H2O2_30_S51455,wt3_33_S51443,wt3_H2O2_31_S51454,wt4_38_S51444,wt4_H2O2_39_S51445
Ca22chr1A_C_albicans_SC5314	macs2	peak	371835	372048	ID=peak_233	wt2_32_S51442,wt2_H2O2_30_S51455,wt3_33_S51443,wt3_H2O2_31_S51454,wt4_H2O2_39_S51445
Ca22chr1A_C_albicans_SC5314	macs2	peak	375668	375783	ID=peak_234	wt2_32_S51442,wt3_33_S51443,wt3_H2O2_31_S51454
Ca22chr1A_C_albicans_SC5314	macs2	peak	378266	378384	ID=peak_235	wt2_32_S51442,wt2_H2O2_30_S51455,wt3_33_S51443,wt3_H2O2_31_S51454,wt4_H2O2_39_S51445
Ca22chr1A_C_albicans_SC5314	macs2	peak	381145	381407	ID=peak_236	wt2_32_S51442,wt2_H2O2_30_S51455,wt3_33_S51443,wt3_H2O2_31_S51454,wt4_38_S51444,wt4_H2O2_39_S51445
Ca22chr1A_C_albicans_SC5314	macs2	peak	382429	382571	ID=peak_237	wt2_32_S51442,wt2_H2O2_30_S51455,wt3_33_S51443,wt3_H2O2_31_S51454,wt4_38_S51444,wt4_H2O2_39_S51445
Ca22chr1A_C_albicans_SC5314	macs2	peak	383560	383713	ID=peak_238	wt2_32_S51442,wt2_H2O2_30_S51455,wt3_33_S51443,wt3_H2O2_31_S51454
Ca22chr1A_C_albicans_SC5314	macs2	peak	386371	386562	ID=peak_239	wt2_32_S51442,wt2_H2O2_30_S51455,wt3_33_S51443,wt3_H2O2_31_S51454,wt4_38_S51444,wt4_H2O2_39_S51445
Ca22chr1A_C_albicans_SC5314	macs2	peak	389046	389133	ID=peak_240	wt2_H2O2_30_S51455
Ca22chr1A_C_albicans_SC5314	macs2	peak	390926	391079	ID=peak_241	wt2_32_S51442,wt2_H2O2_30_S51455,wt3_33_S51443,wt3_H2O2_31_S51454,wt4_38_S51444
Ca22chr1A_C_albicans_SC5314	macs2	peak	394403	394889	ID=peak_242	wt2_32_S51442,wt2_H2O2_30_S51455,wt3_33_S51443,wt3_H2O2_31_S51454,wt4_38_S51444,wt4_H2O2_39_S51445
Ca22chr1A_C_albicans_SC5314	macs2	peak	394977	395149	ID=peak_243	wt2_32_S51442,wt2_H2O2_30_S51455,wt3_33_S51443,wt3_H2O2_31_S51454
Ca22chr1A_C_albicans_SC5314	macs2	peak	395258	395474	ID=peak_244	wt2_32_S51442,wt2_H2O2_30_S51455,wt3_33_S51443,wt3_H2O2_31_S51454,wt4_H2O2_39_S51445
Ca22chr1A_C_albicans_SC5314	macs2	peak	399984	400057	ID=peak_245	wt3_H2O2_31_S51454
Ca22chr1A_C_albicans_SC5314	macs2	peak	400649	400738	ID=peak_246	wt3_33_S51443
Ca22chr1A_C_albicans_SC5314	macs2	peak	402790	402895	ID=peak_247	wt2_32_S51442
Ca22chr1A_C_albicans_SC5314	macs2	peak	403708	403910	ID=peak_248	wt2_32_S51442,wt2_H2O2_30_S51455,wt3_33_S51443,wt3_H2O2_31_S51454,wt4_38_S51444,wt4_H2O2_39_S51445
Ca22chr1A_C_albicans_SC5314	macs2	peak	405148	405628	ID=peak_249	wt2_32_S51442,wt2_H2O2_30_S51455,wt3_33_S51443,wt3_H2O2_31_S51454,wt4_38_S51444,wt4_H2O2_39_S51445
Ca22chr1A_C_albicans_SC5314	macs2	peak	405702	406023	ID=peak_250	wt2_32_S51442,wt2_H2O2_30_S51455,wt3_33_S51443,wt3_H2O2_31_S51454,wt4_38_S51444,wt4_H2O2_39_S51445
Ca22chr1A_C_albicans_SC5314	macs2	peak	406139	406574	ID=peak_251	wt2_32_S51442,wt2_H2O2_30_S51455,wt3_33_S51443,wt3_H2O2_31_S51454,wt4_38_S51444
Ca22chr1A_C_albicans_SC5314	macs2	peak	416323	416400	ID=peak_252	wt2_H2O2_30_S51455,wt4_38_S51444
Ca22chr1A_C_albicans_SC5314	macs2	peak	417755	417938	ID=peak_253	wt2_32_S51442,wt2_H2O2_30_S51455,wt3_33_S51443,wt3_H2O2_31_S51454,wt4_H2O2_39_S51445
Ca22chr1A_C_albicans_SC5314	macs2	peak	420697	421107	ID=peak_254	wt2_32_S51442,wt2_H2O2_30_S51455,wt3_33_S51443,wt3_H2O2_31_S51454,wt4_H2O2_39_S51445
Ca22chr1A_C_albicans_SC5314	macs2	peak	424035	424213	ID=peak_255	wt2_32_S51442,wt2_H2O2_30_S51455,wt3_33_S51443,wt3_H2O2_31_S51454,wt4_H2O2_39_S51445
Ca22chr1A_C_albicans_SC5314	macs2	peak	424392	424513	ID=peak_256	wt2_32_S51442,wt2_H2O2_30_S51455
Ca22chr1A_C_albicans_SC5314	macs2	peak	425604	425751	ID=peak_257	wt2_32_S51442,wt2_H2O2_30_S51455,wt3_33_S51443,wt3_H2O2_31_S51454
Ca22chr1A_C_albicans_SC5314	macs2	peak	427298	427502	ID=peak_258	wt2_32_S51442,wt2_H2O2_30_S51455,wt3_33_S51443,wt3_H2O2_31_S51454
Ca22chr1A_C_albicans_SC5314	macs2	peak	429111	429279	ID=peak_259	wt2_32_S51442,wt2_H2O2_30_S51455,wt3_33_S51443,wt3_H2O2_31_S51454,wt4_38_S51444,wt4_H2O2_39_S51445
Ca22chr1A_C_albicans_SC5314	macs2	peak	434166	434273	ID=peak_260	wt2_32_S51442,wt2_H2O2_30_S51455,wt3_33_S51443,wt3_H2O2_31_S51454,wt4_H2O2_39_S51445
Ca22chr1A_C_albicans_SC5314	macs2	peak	436444	436604	ID=peak_261	wt2_32_S51442,wt2_H2O2_30_S51455,wt3_H2O2_31_S51454,wt4_H2O2_39_S51445
Ca22chr1A_C_albicans_SC5314	macs2	peak	436716	436983	ID=peak_262	wt2_32_S51442,wt2_H2O2_30_S51455,wt3_33_S51443,wt3_H2O2_31_S51454,wt4_38_S51444,wt4_H2O2_39_S51445
Ca22chr1A_C_albicans_SC5314	macs2	peak	438072	438528	ID=peak_263	wt2_32_S51442,wt2_H2O2_30_S51455,wt3_33_S51443,wt3_H2O2_31_S51454,wt4_38_S51444,wt4_H2O2_39_S51445
Ca22chr1A_C_albicans_SC5314	macs2	peak	438650	439069	ID=peak_264	wt2_32_S51442,wt2_H2O2_30_S51455,wt3_33_S51443,wt3_H2O2_31_S51454,wt4_38_S51444,wt4_H2O2_39_S51445
Ca22chr1A_C_albicans_SC5314	macs2	peak	439303	439752	ID=peak_265	wt2_32_S51442,wt2_H2O2_30_S51455,wt3_33_S51443,wt3_H2O2_31_S51454,wt4_38_S51444,wt4_H2O2_39_S51445
Ca22chr1A_C_albicans_SC5314	macs2	peak	439841	440982	ID=peak_266	wt2_32_S51442,wt2_H2O2_30_S51455,wt3_33_S51443,wt3_H2O2_31_S51454,wt4_38_S51444,wt4_H2O2_39_S51445
Ca22chr1A_C_albicans_SC5314	macs2	peak	441108	441225	ID=peak_267	wt2_32_S51442,wt2_H2O2_30_S51455,wt3_H2O2_31_S51454
Ca22chr1A_C_albicans_SC5314	macs2	peak	441353	441585	ID=peak_268	wt2_H2O2_30_S51455,wt3_H2O2_31_S51454,wt4_H2O2_39_S51445
Ca22chr1A_C_albicans_SC5314	macs2	peak	441708	441970	ID=peak_269	wt2_32_S51442,wt2_H2O2_30_S51455,wt3_33_S51443,wt3_H2O2_31_S51454,wt4_H2O2_39_S51445
Ca22chr1A_C_albicans_SC5314	macs2	peak	442113	442243	ID=peak_270	wt2_32_S51442,wt2_H2O2_30_S51455,wt3_33_S51443,wt3_H2O2_31_S51454,wt4_38_S51444,wt4_H2O2_39_S51445
Ca22chr1A_C_albicans_SC5314	macs2	peak	442461	442541	ID=peak_271	wt4_H2O2_39_S51445
Ca22chr1A_C_albicans_SC5314	macs2	peak	444361	444788	ID=peak_272	wt2_32_S51442,wt2_H2O2_30_S51455,wt3_33_S51443,wt3_H2O2_31_S51454,wt4_38_S51444,wt4_H2O2_39_S51445
Ca22chr1A_C_albicans_SC5314	macs2	peak	444883	447172	ID=peak_273	wt2_32_S51442,wt2_H2O2_30_S51455,wt3_33_S51443,wt3_H2O2_31_S51454,wt4_38_S51444,wt4_H2O2_39_S51445
Ca22chr1A_C_albicans_SC5314	macs2	peak	447858	448073	ID=peak_274	wt2_32_S51442,wt2_H2O2_30_S51455,wt3_33_S51443,wt4_H2O2_39_S51445
Ca22chr1A_C_albicans_SC5314	macs2	peak	448705	448801	ID=peak_275	wt3_H2O2_31_S51454
Ca22chr1A_C_albicans_SC5314	macs2	peak	450253	450330	ID=peak_276	wt4_H2O2_39_S51445
Ca22chr1A_C_albicans_SC5314	macs2	peak	451028	451892	ID=peak_277	wt2_32_S51442,wt2_H2O2_30_S51455,wt3_33_S51443,wt3_H2O2_31_S51454,wt4_38_S51444,wt4_H2O2_39_S51445
Ca22chr1A_C_albicans_SC5314	macs2	peak	456017	456521	ID=peak_278	wt2_32_S51442,wt2_H2O2_30_S51455,wt3_33_S51443,wt3_H2O2_31_S51454,wt4_H2O2_39_S51445
Ca22chr1A_C_albicans_SC5314	macs2	peak	460114	460632	ID=peak_279	wt2_32_S51442,wt2_H2O2_30_S51455,wt3_33_S51443,wt3_H2O2_31_S51454,wt4_38_S51444,wt4_H2O2_39_S51445
Ca22chr1A_C_albicans_SC5314	macs2	peak	463771	463963	ID=peak_280	wt2_32_S51442,wt2_H2O2_30_S51455,wt3_33_S51443,wt3_H2O2_31_S51454,wt4_38_S51444,wt4_H2O2_39_S51445
Ca22chr1A_C_albicans_SC5314	macs2	peak	464821	465112	ID=peak_281	wt2_32_S51442,wt2_H2O2_30_S51455,wt3_33_S51443,wt3_H2O2_31_S51454,wt4_38_S51444,wt4_H2O2_39_S51445
Ca22chr1A_C_albicans_SC5314	macs2	peak	468132	468464	ID=peak_282	wt2_32_S51442,wt2_H2O2_30_S51455,wt3_33_S51443,wt3_H2O2_31_S51454,wt4_38_S51444,wt4_H2O2_39_S51445
Ca22chr1A_C_albicans_SC5314	macs2	peak	472528	472824	ID=peak_283	wt2_32_S51442,wt2_H2O2_30_S51455,wt3_33_S51443,wt3_H2O2_31_S51454,wt4_38_S51444
Ca22chr1A_C_albicans_SC5314	macs2	peak	473079	473447	ID=peak_284	wt2_32_S51442,wt2_H2O2_30_S51455,wt3_33_S51443,wt3_H2O2_31_S51454
Ca22chr1A_C_albicans_SC5314	macs2	peak	473724	473900	ID=peak_285	wt2_H2O2_30_S51455,wt3_H2O2_31_S51454,wt4_38_S51444
Ca22chr1A_C_albicans_SC5314	macs2	peak	473958	474063	ID=peak_286	wt2_32_S51442,wt2_H2O2_30_S51455,wt3_33_S51443,wt3_H2O2_31_S51454
Ca22chr1A_C_albicans_SC5314	macs2	peak	477156	477325	ID=peak_287	wt2_32_S51442,wt2_H2O2_30_S51455,wt3_33_S51443,wt3_H2O2_31_S51454
Ca22chr1A_C_albicans_SC5314	macs2	peak	478339	478490	ID=peak_288	wt2_32_S51442,wt2_H2O2_30_S51455,wt3_33_S51443,wt3_H2O2_31_S51454,wt4_38_S51444,wt4_H2O2_39_S51445
Ca22chr1A_C_albicans_SC5314	macs2	peak	482095	482222	ID=peak_289	wt2_32_S51442,wt2_H2O2_30_S51455,wt3_33_S51443,wt3_H2O2_31_S51454,wt4_H2O2_39_S51445
Ca22chr1A_C_albicans_SC5314	macs2	peak	483521	483628	ID=peak_290	wt2_32_S51442
Ca22chr1A_C_albicans_SC5314	macs2	peak	486573	487188	ID=peak_291	wt2_32_S51442,wt2_H2O2_30_S51455,wt3_33_S51443,wt3_H2O2_31_S51454,wt4_38_S51444,wt4_H2O2_39_S51445
Ca22chr1A_C_albicans_SC5314	macs2	peak	488261	488862	ID=peak_292	wt2_32_S51442,wt2_H2O2_30_S51455,wt3_33_S51443,wt3_H2O2_31_S51454,wt4_38_S51444,wt4_H2O2_39_S51445
Ca22chr1A_C_albicans_SC5314	macs2	peak	496456	496535	ID=peak_293	wt2_32_S51442,wt3_33_S51443
Ca22chr1A_C_albicans_SC5314	macs2	peak	497177	497417	ID=peak_294	wt2_32_S51442,wt2_H2O2_30_S51455,wt3_33_S51443,wt3_H2O2_31_S51454,wt4_38_S51444,wt4_H2O2_39_S51445
Ca22chr1A_C_albicans_SC5314	macs2	peak	497551	497730	ID=peak_295	wt2_32_S51442,wt2_H2O2_30_S51455,wt3_33_S51443,wt3_H2O2_31_S51454,wt4_38_S51444,wt4_H2O2_39_S51445
Ca22chr1A_C_albicans_SC5314	macs2	peak	503675	503929	ID=peak_296	wt2_32_S51442,wt2_H2O2_30_S51455,wt3_33_S51443,wt3_H2O2_31_S51454,wt4_38_S51444,wt4_H2O2_39_S51445
Ca22chr1A_C_albicans_SC5314	macs2	peak	505383	505597	ID=peak_297	wt2_32_S51442,wt2_H2O2_30_S51455,wt3_H2O2_31_S51454
Ca22chr1A_C_albicans_SC5314	macs2	peak	512583	512659	ID=peak_298	wt2_32_S51442,wt3_33_S51443,wt3_H2O2_31_S51454
Ca22chr1A_C_albicans_SC5314	macs2	peak	513068	513766	ID=peak_299	wt2_32_S51442,wt2_H2O2_30_S51455,wt3_33_S51443,wt3_H2O2_31_S51454,wt4_38_S51444,wt4_H2O2_39_S51445
Ca22chr1A_C_albicans_SC5314	macs2	peak	513850	515251	ID=peak_300	wt2_32_S51442,wt2_H2O2_30_S51455,wt3_33_S51443,wt3_H2O2_31_S51454,wt4_38_S51444,wt4_H2O2_39_S51445
Ca22chr1A_C_albicans_SC5314	macs2	peak	517786	517950	ID=peak_301	wt2_32_S51442,wt2_H2O2_30_S51455,wt3_33_S51443,wt3_H2O2_31_S51454,wt4_H2O2_39_S51445
Ca22chr1A_C_albicans_SC5314	macs2	peak	519250	519573	ID=peak_302	wt2_32_S51442,wt2_H2O2_30_S51455,wt3_33_S51443,wt3_H2O2_31_S51454,wt4_38_S51444,wt4_H2O2_39_S51445
Ca22chr1A_C_albicans_SC5314	macs2	peak	520606	520960	ID=peak_303	wt2_32_S51442,wt2_H2O2_30_S51455,wt3_33_S51443,wt3_H2O2_31_S51454,wt4_38_S51444,wt4_H2O2_39_S51445
Ca22chr1A_C_albicans_SC5314	macs2	peak	522063	522153	ID=peak_304	wt2_H2O2_30_S51455
Ca22chr1A_C_albicans_SC5314	macs2	peak	522345	522447	ID=peak_305	wt2_32_S51442,wt2_H2O2_30_S51455,wt3_33_S51443,wt3_H2O2_31_S51454
Ca22chr1A_C_albicans_SC5314	macs2	peak	523657	523890	ID=peak_306	wt2_32_S51442,wt2_H2O2_30_S51455,wt3_33_S51443,wt3_H2O2_31_S51454,wt4_38_S51444,wt4_H2O2_39_S51445
Ca22chr1A_C_albicans_SC5314	macs2	peak	526879	527069	ID=peak_307	wt2_32_S51442,wt2_H2O2_30_S51455,wt3_33_S51443,wt3_H2O2_31_S51454,wt4_H2O2_39_S51445
Ca22chr1A_C_albicans_SC5314	macs2	peak	527883	527967	ID=peak_308	wt2_32_S51442,wt3_33_S51443
Ca22chr1A_C_albicans_SC5314	macs2	peak	529575	529743	ID=peak_309	wt2_32_S51442,wt2_H2O2_30_S51455,wt3_33_S51443,wt3_H2O2_31_S51454,wt4_38_S51444
Ca22chr1A_C_albicans_SC5314	macs2	peak	530697	530772	ID=peak_310	wt4_38_S51444
Ca22chr1A_C_albicans_SC5314	macs2	peak	531544	531682	ID=peak_311	wt4_38_S51444
Ca22chr1A_C_albicans_SC5314	macs2	peak	534330	535348	ID=peak_312	wt2_32_S51442,wt2_H2O2_30_S51455,wt3_33_S51443,wt3_H2O2_31_S51454,wt4_38_S51444,wt4_H2O2_39_S51445
Ca22chr1A_C_albicans_SC5314	macs2	peak	535599	535751	ID=peak_313	wt2_32_S51442,wt2_H2O2_30_S51455,wt3_33_S51443,wt3_H2O2_31_S51454,wt4_38_S51444,wt4_H2O2_39_S51445
Ca22chr1A_C_albicans_SC5314	macs2	peak	535878	536709	ID=peak_314	wt2_32_S51442,wt2_H2O2_30_S51455,wt3_33_S51443,wt3_H2O2_31_S51454,wt4_38_S51444,wt4_H2O2_39_S51445
Ca22chr1A_C_albicans_SC5314	macs2	peak	539238	539360	ID=peak_315	wt2_32_S51442,wt2_H2O2_30_S51455,wt3_33_S51443
Ca22chr1A_C_albicans_SC5314	macs2	peak	539720	539832	ID=peak_316	wt2_32_S51442
Ca22chr1A_C_albicans_SC5314	macs2	peak	542768	542969	ID=peak_317	wt2_32_S51442,wt3_H2O2_31_S51454
Ca22chr1A_C_albicans_SC5314	macs2	peak	543101	543238	ID=peak_318	wt2_32_S51442,wt3_33_S51443
Ca22chr1A_C_albicans_SC5314	macs2	peak	543440	543614	ID=peak_319	wt2_32_S51442,wt2_H2O2_30_S51455,wt3_33_S51443,wt3_H2O2_31_S51454,wt4_38_S51444,wt4_H2O2_39_S51445
Ca22chr1A_C_albicans_SC5314	macs2	peak	543822	543984	ID=peak_320	wt2_32_S51442,wt2_H2O2_30_S51455,wt3_33_S51443,wt3_H2O2_31_S51454
Ca22chr1A_C_albicans_SC5314	macs2	peak	544172	544259	ID=peak_321	wt4_H2O2_39_S51445
Ca22chr1A_C_albicans_SC5314	macs2	peak	550699	550775	ID=peak_322	wt2_32_S51442,wt3_H2O2_31_S51454
Ca22chr1A_C_albicans_SC5314	macs2	peak	552484	552639	ID=peak_323	wt2_H2O2_30_S51455,wt3_33_S51443,wt3_H2O2_31_S51454,wt4_H2O2_39_S51445
Ca22chr1A_C_albicans_SC5314	macs2	peak	553499	553681	ID=peak_324	wt2_32_S51442,wt2_H2O2_30_S51455,wt3_33_S51443,wt3_H2O2_31_S51454,wt4_38_S51444,wt4_H2O2_39_S51445
Ca22chr1A_C_albicans_SC5314	macs2	peak	555464	555550	ID=peak_325	wt2_32_S51442,wt3_H2O2_31_S51454
Ca22chr1A_C_albicans_SC5314	macs2	peak	563707	563817	ID=peak_326	wt2_H2O2_30_S51455
Ca22chr1A_C_albicans_SC5314	macs2	peak	564511	564945	ID=peak_327	wt2_32_S51442,wt2_H2O2_30_S51455,wt3_33_S51443,wt3_H2O2_31_S51454,wt4_38_S51444,wt4_H2O2_39_S51445
Ca22chr1A_C_albicans_SC5314	macs2	peak	565438	565650	ID=peak_328	wt2_32_S51442,wt2_H2O2_30_S51455,wt3_33_S51443,wt3_H2O2_31_S51454,wt4_38_S51444,wt4_H2O2_39_S51445
Ca22chr1A_C_albicans_SC5314	macs2	peak	567282	567490	ID=peak_329	wt2_32_S51442,wt2_H2O2_30_S51455,wt3_33_S51443,wt3_H2O2_31_S51454,wt4_38_S51444
Ca22chr1A_C_albicans_SC5314	macs2	peak	569067	569349	ID=peak_330	wt2_32_S51442,wt2_H2O2_30_S51455,wt3_33_S51443,wt3_H2O2_31_S51454,wt4_38_S51444,wt4_H2O2_39_S51445
Ca22chr1A_C_albicans_SC5314	macs2	peak	570506	570610	ID=peak_331	wt2_32_S51442
Ca22chr1A_C_albicans_SC5314	macs2	peak	572286	572425	ID=peak_332	wt2_32_S51442,wt2_H2O2_30_S51455,wt3_33_S51443,wt3_H2O2_31_S51454
Ca22chr1A_C_albicans_SC5314	macs2	peak	573663	573872	ID=peak_333	wt2_32_S51442,wt3_33_S51443
Ca22chr1A_C_albicans_SC5314	macs2	peak	579119	579218	ID=peak_334	wt2_H2O2_30_S51455
Ca22chr1A_C_albicans_SC5314	macs2	peak	579506	579699	ID=peak_335	wt2_32_S51442,wt2_H2O2_30_S51455,wt3_33_S51443,wt3_H2O2_31_S51454,wt4_38_S51444,wt4_H2O2_39_S51445
Ca22chr1A_C_albicans_SC5314	macs2	peak	580883	581046	ID=peak_336	wt2_32_S51442,wt2_H2O2_30_S51455,wt3_33_S51443,wt3_H2O2_31_S51454,wt4_38_S51444,wt4_H2O2_39_S51445
Ca22chr1A_C_albicans_SC5314	macs2	peak	581425	581506	ID=peak_337	wt3_H2O2_31_S51454
Ca22chr1A_C_albicans_SC5314	macs2	peak	581625	581726	ID=peak_338	wt2_32_S51442,wt2_H2O2_30_S51455,wt3_H2O2_31_S51454
Ca22chr1A_C_albicans_SC5314	macs2	peak	582709	582811	ID=peak_339	wt2_32_S51442,wt2_H2O2_30_S51455,wt3_33_S51443,wt3_H2O2_31_S51454
Ca22chr1A_C_albicans_SC5314	macs2	peak	585354	585799	ID=peak_340	wt2_32_S51442,wt2_H2O2_30_S51455,wt3_33_S51443,wt3_H2O2_31_S51454,wt4_H2O2_39_S51445
Ca22chr1A_C_albicans_SC5314	macs2	peak	588259	588393	ID=peak_341	wt3_H2O2_31_S51454
Ca22chr1A_C_albicans_SC5314	macs2	peak	588464	588753	ID=peak_342	wt2_32_S51442,wt2_H2O2_30_S51455,wt3_33_S51443,wt3_H2O2_31_S51454,wt4_38_S51444,wt4_H2O2_39_S51445
Ca22chr1A_C_albicans_SC5314	macs2	peak	593447	593533	ID=peak_343	wt2_H2O2_30_S51455
Ca22chr1A_C_albicans_SC5314	macs2	peak	595549	595843	ID=peak_344	wt2_32_S51442,wt2_H2O2_30_S51455,wt3_33_S51443,wt3_H2O2_31_S51454,wt4_H2O2_39_S51445
Ca22chr1A_C_albicans_SC5314	macs2	peak	596406	596855	ID=peak_345	wt2_32_S51442,wt2_H2O2_30_S51455,wt3_33_S51443,wt3_H2O2_31_S51454,wt4_38_S51444,wt4_H2O2_39_S51445
Ca22chr1A_C_albicans_SC5314	macs2	peak	597000	597320	ID=peak_346	wt2_32_S51442,wt2_H2O2_30_S51455,wt3_33_S51443,wt3_H2O2_31_S51454
Ca22chr1A_C_albicans_SC5314	macs2	peak	597462	597788	ID=peak_347	wt2_32_S51442,wt2_H2O2_30_S51455,wt3_H2O2_31_S51454,wt4_H2O2_39_S51445
Ca22chr1A_C_albicans_SC5314	macs2	peak	600115	600489	ID=peak_348	wt2_32_S51442,wt2_H2O2_30_S51455,wt3_33_S51443,wt3_H2O2_31_S51454,wt4_38_S51444,wt4_H2O2_39_S51445
Ca22chr1A_C_albicans_SC5314	macs2	peak	603808	603895	ID=peak_349	wt2_32_S51442,wt2_H2O2_30_S51455,wt3_33_S51443,wt3_H2O2_31_S51454
Ca22chr1A_C_albicans_SC5314	macs2	peak	606693	606963	ID=peak_350	wt2_32_S51442,wt2_H2O2_30_S51455,wt3_33_S51443,wt3_H2O2_31_S51454,wt4_38_S51444,wt4_H2O2_39_S51445
Ca22chr1A_C_albicans_SC5314	macs2	peak	607416	607498	ID=peak_351	wt4_38_S51444
Ca22chr1A_C_albicans_SC5314	macs2	peak	607653	607735	ID=peak_352	wt2_32_S51442,wt2_H2O2_30_S51455
Ca22chr1A_C_albicans_SC5314	macs2	peak	610079	610148	ID=peak_353	wt2_32_S51442
Ca22chr1A_C_albicans_SC5314	macs2	peak	611697	611845	ID=peak_354	wt2_32_S51442,wt2_H2O2_30_S51455,wt3_33_S51443,wt3_H2O2_31_S51454,wt4_38_S51444,wt4_H2O2_39_S51445
Ca22chr1A_C_albicans_SC5314	macs2	peak	614383	614453	ID=peak_355	wt4_38_S51444
Ca22chr1A_C_albicans_SC5314	macs2	peak	618039	618280	ID=peak_356	wt2_32_S51442,wt2_H2O2_30_S51455,wt3_33_S51443,wt3_H2O2_31_S51454,wt4_H2O2_39_S51445
Ca22chr1A_C_albicans_SC5314	macs2	peak	619688	619985	ID=peak_357	wt2_32_S51442,wt2_H2O2_30_S51455,wt3_33_S51443,wt3_H2O2_31_S51454,wt4_38_S51444,wt4_H2O2_39_S51445
Ca22chr1A_C_albicans_SC5314	macs2	peak	620323	620391	ID=peak_358	wt4_38_S51444
Ca22chr1A_C_albicans_SC5314	macs2	peak	621378	621585	ID=peak_359	wt2_32_S51442,wt2_H2O2_30_S51455,wt3_33_S51443,wt3_H2O2_31_S51454,wt4_38_S51444,wt4_H2O2_39_S51445
Ca22chr1A_C_albicans_SC5314	macs2	peak	624134	624269	ID=peak_360	wt2_32_S51442,wt3_33_S51443
Ca22chr1A_C_albicans_SC5314	macs2	peak	624597	624686	ID=peak_361	wt2_32_S51442,wt3_33_S51443
Ca22chr1A_C_albicans_SC5314	macs2	peak	626260	626469	ID=peak_362	wt2_32_S51442,wt2_H2O2_30_S51455,wt3_33_S51443,wt3_H2O2_31_S51454,wt4_38_S51444,wt4_H2O2_39_S51445
Ca22chr1A_C_albicans_SC5314	macs2	peak	629855	630125	ID=peak_363	wt2_32_S51442,wt2_H2O2_30_S51455,wt3_33_S51443,wt3_H2O2_31_S51454,wt4_38_S51444
Ca22chr1A_C_albicans_SC5314	macs2	peak	631650	632068	ID=peak_364	wt2_32_S51442,wt2_H2O2_30_S51455,wt3_33_S51443,wt3_H2O2_31_S51454,wt4_38_S51444,wt4_H2O2_39_S51445
Ca22chr1A_C_albicans_SC5314	macs2	peak	633258	633341	ID=peak_365	wt2_32_S51442
Ca22chr1A_C_albicans_SC5314	macs2	peak	634776	634973	ID=peak_366	wt2_H2O2_30_S51455,wt3_33_S51443,wt3_H2O2_31_S51454,wt4_38_S51444
Ca22chr1A_C_albicans_SC5314	macs2	peak	642685	643131	ID=peak_367	wt2_32_S51442,wt2_H2O2_30_S51455,wt3_33_S51443,wt3_H2O2_31_S51454,wt4_38_S51444,wt4_H2O2_39_S51445
Ca22chr1A_C_albicans_SC5314	macs2	peak	644442	644620	ID=peak_368	wt2_32_S51442,wt2_H2O2_30_S51455,wt3_33_S51443,wt3_H2O2_31_S51454,wt4_38_S51444,wt4_H2O2_39_S51445
Ca22chr1A_C_albicans_SC5314	macs2	peak	644849	644981	ID=peak_369	wt2_32_S51442,wt2_H2O2_30_S51455,wt3_H2O2_31_S51454
Ca22chr1A_C_albicans_SC5314	macs2	peak	649517	649610	ID=peak_370	wt2_H2O2_30_S51455,wt3_H2O2_31_S51454
Ca22chr1A_C_albicans_SC5314	macs2	peak	649726	650040	ID=peak_371	wt2_32_S51442,wt2_H2O2_30_S51455,wt3_33_S51443,wt3_H2O2_31_S51454,wt4_38_S51444,wt4_H2O2_39_S51445
Ca22chr1A_C_albicans_SC5314	macs2	peak	651317	651431	ID=peak_372	wt2_32_S51442,wt3_33_S51443
Ca22chr1A_C_albicans_SC5314	macs2	peak	651611	651867	ID=peak_373	wt2_32_S51442,wt2_H2O2_30_S51455,wt3_33_S51443,wt3_H2O2_31_S51454,wt4_38_S51444,wt4_H2O2_39_S51445
Ca22chr1A_C_albicans_SC5314	macs2	peak	655448	655691	ID=peak_374	wt2_32_S51442,wt2_H2O2_30_S51455,wt3_33_S51443,wt3_H2O2_31_S51454,wt4_38_S51444,wt4_H2O2_39_S51445
Ca22chr1A_C_albicans_SC5314	macs2	peak	657308	657427	ID=peak_375	wt2_32_S51442,wt2_H2O2_30_S51455,wt3_33_S51443,wt3_H2O2_31_S51454,wt4_H2O2_39_S51445
Ca22chr1A_C_albicans_SC5314	macs2	peak	658643	658741	ID=peak_376	wt2_32_S51442,wt2_H2O2_30_S51455,wt3_33_S51443
Ca22chr1A_C_albicans_SC5314	macs2	peak	663562	663720	ID=peak_377	wt2_32_S51442,wt2_H2O2_30_S51455,wt3_33_S51443,wt3_H2O2_31_S51454
Ca22chr1A_C_albicans_SC5314	macs2	peak	664539	664878	ID=peak_378	wt2_32_S51442,wt2_H2O2_30_S51455,wt3_33_S51443,wt3_H2O2_31_S51454,wt4_38_S51444,wt4_H2O2_39_S51445
Ca22chr1A_C_albicans_SC5314	macs2	peak	664993	666322	ID=peak_379	wt2_32_S51442,wt2_H2O2_30_S51455,wt3_33_S51443,wt3_H2O2_31_S51454,wt4_38_S51444,wt4_H2O2_39_S51445
Ca22chr1A_C_albicans_SC5314	macs2	peak	666387	666932	ID=peak_380	wt2_32_S51442,wt2_H2O2_30_S51455,wt3_33_S51443,wt3_H2O2_31_S51454,wt4_38_S51444,wt4_H2O2_39_S51445
Ca22chr1A_C_albicans_SC5314	macs2	peak	667141	667455	ID=peak_381	wt2_32_S51442,wt3_33_S51443,wt4_38_S51444
Ca22chr1A_C_albicans_SC5314	macs2	peak	667673	668060	ID=peak_382	wt2_32_S51442,wt2_H2O2_30_S51455,wt3_33_S51443,wt3_H2O2_31_S51454,wt4_38_S51444
Ca22chr1A_C_albicans_SC5314	macs2	peak	668174	668369	ID=peak_383	wt2_32_S51442,wt2_H2O2_30_S51455
Ca22chr1A_C_albicans_SC5314	macs2	peak	671696	671774	ID=peak_384	wt4_38_S51444
Ca22chr1A_C_albicans_SC5314	macs2	peak	673968	674215	ID=peak_385	wt2_32_S51442,wt2_H2O2_30_S51455,wt3_33_S51443,wt3_H2O2_31_S51454,wt4_38_S51444,wt4_H2O2_39_S51445
Ca22chr1A_C_albicans_SC5314	macs2	peak	674368	674541	ID=peak_386	wt2_32_S51442,wt2_H2O2_30_S51455,wt3_33_S51443,wt3_H2O2_31_S51454,wt4_38_S51444,wt4_H2O2_39_S51445
Ca22chr1A_C_albicans_SC5314	macs2	peak	676241	676420	ID=peak_387	wt2_32_S51442,wt2_H2O2_30_S51455,wt3_33_S51443,wt3_H2O2_31_S51454,wt4_38_S51444,wt4_H2O2_39_S51445
Ca22chr1A_C_albicans_SC5314	macs2	peak	676798	677217	ID=peak_388	wt2_32_S51442,wt2_H2O2_30_S51455,wt3_33_S51443,wt3_H2O2_31_S51454,wt4_38_S51444,wt4_H2O2_39_S51445
Ca22chr1A_C_albicans_SC5314	macs2	peak	679191	679272	ID=peak_389	wt2_32_S51442,wt2_H2O2_30_S51455,wt3_33_S51443
Ca22chr1A_C_albicans_SC5314	macs2	peak	679546	679687	ID=peak_390	wt2_32_S51442,wt2_H2O2_30_S51455,wt3_33_S51443,wt3_H2O2_31_S51454,wt4_38_S51444,wt4_H2O2_39_S51445
Ca22chr1A_C_albicans_SC5314	macs2	peak	683726	683934	ID=peak_391	wt2_H2O2_30_S51455,wt3_H2O2_31_S51454,wt4_H2O2_39_S51445
Ca22chr1A_C_albicans_SC5314	macs2	peak	685211	685364	ID=peak_392	wt2_32_S51442,wt2_H2O2_30_S51455,wt3_33_S51443,wt3_H2O2_31_S51454
Ca22chr1A_C_albicans_SC5314	macs2	peak	686405	686480	ID=peak_393	wt2_H2O2_30_S51455
Ca22chr1A_C_albicans_SC5314	macs2	peak	690064	690305	ID=peak_394	wt2_32_S51442,wt2_H2O2_30_S51455,wt3_33_S51443,wt3_H2O2_31_S51454,wt4_H2O2_39_S51445
Ca22chr1A_C_albicans_SC5314	macs2	peak	692803	692877	ID=peak_395	wt3_H2O2_31_S51454
Ca22chr1A_C_albicans_SC5314	macs2	peak	693448	693724	ID=peak_396	wt2_32_S51442,wt2_H2O2_30_S51455,wt3_33_S51443,wt3_H2O2_31_S51454,wt4_38_S51444,wt4_H2O2_39_S51445
Ca22chr1A_C_albicans_SC5314	macs2	peak	695565	695670	ID=peak_397	wt4_H2O2_39_S51445
Ca22chr1A_C_albicans_SC5314	macs2	peak	695840	695963	ID=peak_398	wt2_H2O2_30_S51455,wt3_33_S51443,wt3_H2O2_31_S51454
Ca22chr1A_C_albicans_SC5314	macs2	peak	697021	697123	ID=peak_399	wt2_32_S51442,wt2_H2O2_30_S51455,wt3_33_S51443,wt3_H2O2_31_S51454,wt4_H2O2_39_S51445
Ca22chr1A_C_albicans_SC5314	macs2	peak	699429	699614	ID=peak_400	wt2_32_S51442,wt2_H2O2_30_S51455,wt3_33_S51443,wt3_H2O2_31_S51454,wt4_38_S51444,wt4_H2O2_39_S51445
Ca22chr1A_C_albicans_SC5314	macs2	peak	699962	700327	ID=peak_401	wt2_32_S51442,wt2_H2O2_30_S51455,wt3_33_S51443,wt3_H2O2_31_S51454,wt4_38_S51444,wt4_H2O2_39_S51445
Ca22chr1A_C_albicans_SC5314	macs2	peak	700877	701000	ID=peak_402	wt4_H2O2_39_S51445
Ca22chr1A_C_albicans_SC5314	macs2	peak	706011	706115	ID=peak_403	wt2_32_S51442,wt2_H2O2_30_S51455,wt3_33_S51443,wt3_H2O2_31_S51454
Ca22chr1A_C_albicans_SC5314	macs2	peak	708861	709334	ID=peak_404	wt2_32_S51442,wt2_H2O2_30_S51455,wt3_33_S51443,wt3_H2O2_31_S51454,wt4_38_S51444,wt4_H2O2_39_S51445
Ca22chr1A_C_albicans_SC5314	macs2	peak	711969	712053	ID=peak_405	wt2_H2O2_30_S51455
Ca22chr1A_C_albicans_SC5314	macs2	peak	712384	712567	ID=peak_406	wt2_32_S51442,wt2_H2O2_30_S51455,wt3_33_S51443,wt3_H2O2_31_S51454,wt4_H2O2_39_S51445
Ca22chr1A_C_albicans_SC5314	macs2	peak	712660	712821	ID=peak_407	wt2_32_S51442,wt2_H2O2_30_S51455,wt3_H2O2_31_S51454
Ca22chr1A_C_albicans_SC5314	macs2	peak	713270	713341	ID=peak_408	wt4_H2O2_39_S51445
Ca22chr1A_C_albicans_SC5314	macs2	peak	714341	714439	ID=peak_409	wt2_32_S51442,wt2_H2O2_30_S51455,wt4_H2O2_39_S51445
Ca22chr1A_C_albicans_SC5314	macs2	peak	714592	714714	ID=peak_410	wt2_32_S51442,wt2_H2O2_30_S51455
Ca22chr1A_C_albicans_SC5314	macs2	peak	714847	715027	ID=peak_411	wt2_32_S51442,wt2_H2O2_30_S51455,wt3_33_S51443,wt3_H2O2_31_S51454
Ca22chr1A_C_albicans_SC5314	macs2	peak	717593	717673	ID=peak_412	wt2_H2O2_30_S51455,wt3_33_S51443
Ca22chr1A_C_albicans_SC5314	macs2	peak	719197	719484	ID=peak_413	wt2_32_S51442,wt2_H2O2_30_S51455,wt3_33_S51443,wt3_H2O2_31_S51454,wt4_38_S51444,wt4_H2O2_39_S51445
Ca22chr1A_C_albicans_SC5314	macs2	peak	726825	726950	ID=peak_414	wt2_32_S51442,wt2_H2O2_30_S51455,wt3_33_S51443,wt3_H2O2_31_S51454,wt4_H2O2_39_S51445
Ca22chr1A_C_albicans_SC5314	macs2	peak	730619	730999	ID=peak_415	wt2_32_S51442,wt2_H2O2_30_S51455,wt3_33_S51443,wt3_H2O2_31_S51454,wt4_38_S51444,wt4_H2O2_39_S51445
Ca22chr1A_C_albicans_SC5314	macs2	peak	735775	735965	ID=peak_416	wt2_32_S51442,wt2_H2O2_30_S51455,wt3_33_S51443,wt3_H2O2_31_S51454,wt4_38_S51444,wt4_H2O2_39_S51445
Ca22chr1A_C_albicans_SC5314	macs2	peak	736174	736624	ID=peak_417	wt2_32_S51442,wt2_H2O2_30_S51455,wt3_33_S51443,wt3_H2O2_31_S51454,wt4_H2O2_39_S51445
Ca22chr1A_C_albicans_SC5314	macs2	peak	737699	737876	ID=peak_418	wt2_32_S51442,wt2_H2O2_30_S51455,wt3_33_S51443,wt3_H2O2_31_S51454
Ca22chr1A_C_albicans_SC5314	macs2	peak	738007	738139	ID=peak_419	wt2_32_S51442,wt2_H2O2_30_S51455,wt3_33_S51443,wt3_H2O2_31_S51454,wt4_H2O2_39_S51445
Ca22chr1A_C_albicans_SC5314	macs2	peak	739763	740071	ID=peak_420	wt2_32_S51442,wt2_H2O2_30_S51455,wt3_33_S51443,wt3_H2O2_31_S51454,wt4_H2O2_39_S51445
Ca22chr1A_C_albicans_SC5314	macs2	peak	740202	740490	ID=peak_421	wt2_32_S51442,wt2_H2O2_30_S51455,wt3_33_S51443,wt3_H2O2_31_S51454,wt4_38_S51444,wt4_H2O2_39_S51445
Ca22chr1A_C_albicans_SC5314	macs2	peak	746420	746553	ID=peak_422	wt2_H2O2_30_S51455,wt3_H2O2_31_S51454
Ca22chr1A_C_albicans_SC5314	macs2	peak	747808	748369	ID=peak_423	wt2_32_S51442,wt2_H2O2_30_S51455,wt3_33_S51443,wt3_H2O2_31_S51454,wt4_38_S51444,wt4_H2O2_39_S51445
Ca22chr1A_C_albicans_SC5314	macs2	peak	749357	749484	ID=peak_424	wt2_32_S51442,wt2_H2O2_30_S51455,wt3_33_S51443,wt3_H2O2_31_S51454,wt4_38_S51444,wt4_H2O2_39_S51445
Ca22chr1A_C_albicans_SC5314	macs2	peak	751109	751291	ID=peak_425	wt2_32_S51442,wt2_H2O2_30_S51455,wt3_H2O2_31_S51454,wt4_38_S51444,wt4_H2O2_39_S51445
Ca22chr1A_C_albicans_SC5314	macs2	peak	752624	752737	ID=peak_426	wt2_32_S51442,wt2_H2O2_30_S51455,wt3_33_S51443,wt3_H2O2_31_S51454
Ca22chr1A_C_albicans_SC5314	macs2	peak	759716	759819	ID=peak_427	wt2_32_S51442,wt2_H2O2_30_S51455,wt3_33_S51443,wt3_H2O2_31_S51454
Ca22chr1A_C_albicans_SC5314	macs2	peak	760140	760229	ID=peak_428	wt2_H2O2_30_S51455
Ca22chr1A_C_albicans_SC5314	macs2	peak	760763	760970	ID=peak_429	wt2_32_S51442,wt2_H2O2_30_S51455,wt3_33_S51443,wt3_H2O2_31_S51454
Ca22chr1A_C_albicans_SC5314	macs2	peak	761152	761257	ID=peak_430	wt2_32_S51442,wt2_H2O2_30_S51455,wt3_33_S51443
Ca22chr1A_C_albicans_SC5314	macs2	peak	761738	761861	ID=peak_431	wt2_32_S51442,wt2_H2O2_30_S51455,wt3_33_S51443,wt3_H2O2_31_S51454,wt4_38_S51444,wt4_H2O2_39_S51445
Ca22chr1A_C_albicans_SC5314	macs2	peak	766490	766753	ID=peak_432	wt2_32_S51442,wt2_H2O2_30_S51455,wt3_33_S51443,wt3_H2O2_31_S51454
Ca22chr1A_C_albicans_SC5314	macs2	peak	767526	767605	ID=peak_433	wt4_38_S51444
Ca22chr1A_C_albicans_SC5314	macs2	peak	771544	771612	ID=peak_434	wt3_H2O2_31_S51454
Ca22chr1A_C_albicans_SC5314	macs2	peak	771943	772110	ID=peak_435	wt2_32_S51442
Ca22chr1A_C_albicans_SC5314	macs2	peak	772797	772880	ID=peak_436	wt3_H2O2_31_S51454
Ca22chr1A_C_albicans_SC5314	macs2	peak	772881	772985	ID=peak_437	wt3_33_S51443
Ca22chr1A_C_albicans_SC5314	macs2	peak	776018	776653	ID=peak_438	wt2_32_S51442,wt2_H2O2_30_S51455,wt3_33_S51443,wt3_H2O2_31_S51454,wt4_38_S51444,wt4_H2O2_39_S51445
Ca22chr1A_C_albicans_SC5314	macs2	peak	779043	779165	ID=peak_439	wt2_32_S51442,wt2_H2O2_30_S51455,wt3_33_S51443,wt3_H2O2_31_S51454,wt4_H2O2_39_S51445
Ca22chr1A_C_albicans_SC5314	macs2	peak	779712	779814	ID=peak_440	wt2_32_S51442,wt3_33_S51443,wt4_38_S51444
Ca22chr1A_C_albicans_SC5314	macs2	peak	780142	780333	ID=peak_441	wt2_32_S51442,wt2_H2O2_30_S51455,wt3_33_S51443,wt3_H2O2_31_S51454,wt4_H2O2_39_S51445
Ca22chr1A_C_albicans_SC5314	macs2	peak	784193	784458	ID=peak_442	wt2_32_S51442,wt2_H2O2_30_S51455,wt3_33_S51443,wt3_H2O2_31_S51454,wt4_38_S51444,wt4_H2O2_39_S51445
Ca22chr1A_C_albicans_SC5314	macs2	peak	786876	787178	ID=peak_443	wt2_32_S51442,wt2_H2O2_30_S51455,wt3_33_S51443,wt3_H2O2_31_S51454,wt4_H2O2_39_S51445
Ca22chr1A_C_albicans_SC5314	macs2	peak	787298	787705	ID=peak_444	wt2_32_S51442,wt2_H2O2_30_S51455,wt3_33_S51443,wt3_H2O2_31_S51454,wt4_38_S51444,wt4_H2O2_39_S51445
Ca22chr1A_C_albicans_SC5314	macs2	peak	787887	788010	ID=peak_445	wt2_H2O2_30_S51455,wt3_H2O2_31_S51454
Ca22chr1A_C_albicans_SC5314	macs2	peak	788228	788385	ID=peak_446	wt2_32_S51442,wt2_H2O2_30_S51455,wt3_33_S51443,wt3_H2O2_31_S51454
Ca22chr1A_C_albicans_SC5314	macs2	peak	794097	794185	ID=peak_447	wt2_32_S51442
Ca22chr1A_C_albicans_SC5314	macs2	peak	794904	795127	ID=peak_448	wt2_32_S51442,wt2_H2O2_30_S51455,wt3_33_S51443,wt3_H2O2_31_S51454,wt4_H2O2_39_S51445
Ca22chr1A_C_albicans_SC5314	macs2	peak	796886	797076	ID=peak_449	wt2_32_S51442,wt2_H2O2_30_S51455,wt3_33_S51443,wt3_H2O2_31_S51454,wt4_38_S51444,wt4_H2O2_39_S51445
Ca22chr1A_C_albicans_SC5314	macs2	peak	799442	799562	ID=peak_450	wt2_32_S51442,wt2_H2O2_30_S51455,wt3_33_S51443,wt3_H2O2_31_S51454,wt4_38_S51444,wt4_H2O2_39_S51445
Ca22chr1A_C_albicans_SC5314	macs2	peak	800757	800896	ID=peak_451	wt2_H2O2_30_S51455
Ca22chr1A_C_albicans_SC5314	macs2	peak	801031	801635	ID=peak_452	wt2_32_S51442,wt2_H2O2_30_S51455,wt3_33_S51443,wt3_H2O2_31_S51454,wt4_38_S51444,wt4_H2O2_39_S51445
Ca22chr1A_C_albicans_SC5314	macs2	peak	804839	805130	ID=peak_453	wt2_32_S51442,wt2_H2O2_30_S51455,wt3_33_S51443,wt3_H2O2_31_S51454,wt4_38_S51444
Ca22chr1A_C_albicans_SC5314	macs2	peak	805335	805405	ID=peak_454	wt2_H2O2_30_S51455
Ca22chr1A_C_albicans_SC5314	macs2	peak	810437	810547	ID=peak_455	wt2_32_S51442,wt2_H2O2_30_S51455
Ca22chr1A_C_albicans_SC5314	macs2	peak	811626	811969	ID=peak_456	wt2_32_S51442,wt2_H2O2_30_S51455,wt3_33_S51443,wt3_H2O2_31_S51454,wt4_38_S51444,wt4_H2O2_39_S51445
Ca22chr1A_C_albicans_SC5314	macs2	peak	812114	812278	ID=peak_457	wt2_32_S51442
Ca22chr1A_C_albicans_SC5314	macs2	peak	813659	813767	ID=peak_458	wt2_32_S51442,wt2_H2O2_30_S51455,wt3_33_S51443,wt3_H2O2_31_S51454
Ca22chr1A_C_albicans_SC5314	macs2	peak	815881	816145	ID=peak_459	wt2_32_S51442,wt2_H2O2_30_S51455,wt3_33_S51443,wt3_H2O2_31_S51454
Ca22chr1A_C_albicans_SC5314	macs2	peak	817651	817907	ID=peak_460	wt2_32_S51442,wt2_H2O2_30_S51455,wt3_33_S51443,wt3_H2O2_31_S51454,wt4_38_S51444,wt4_H2O2_39_S51445
Ca22chr1A_C_albicans_SC5314	macs2	peak	818112	818367	ID=peak_461	wt2_32_S51442,wt2_H2O2_30_S51455,wt3_33_S51443,wt3_H2O2_31_S51454,wt4_38_S51444,wt4_H2O2_39_S51445
Ca22chr1A_C_albicans_SC5314	macs2	peak	818821	818919	ID=peak_462	wt2_32_S51442,wt2_H2O2_30_S51455
Ca22chr1A_C_albicans_SC5314	macs2	peak	819600	819908	ID=peak_463	wt2_32_S51442,wt2_H2O2_30_S51455,wt3_33_S51443,wt3_H2O2_31_S51454,wt4_H2O2_39_S51445
Ca22chr1A_C_albicans_SC5314	macs2	peak	820224	820358	ID=peak_464	wt2_32_S51442,wt2_H2O2_30_S51455
Ca22chr1A_C_albicans_SC5314	macs2	peak	820777	821147	ID=peak_465	wt2_32_S51442,wt2_H2O2_30_S51455,wt3_33_S51443,wt3_H2O2_31_S51454,wt4_38_S51444,wt4_H2O2_39_S51445
Ca22chr1A_C_albicans_SC5314	macs2	peak	823411	823492	ID=peak_466	wt2_H2O2_30_S51455
Ca22chr1A_C_albicans_SC5314	macs2	peak	825153	825254	ID=peak_467	wt2_32_S51442,wt3_33_S51443,wt3_H2O2_31_S51454
Ca22chr1A_C_albicans_SC5314	macs2	peak	828283	828473	ID=peak_468	wt2_32_S51442,wt2_H2O2_30_S51455,wt3_33_S51443,wt3_H2O2_31_S51454,wt4_38_S51444,wt4_H2O2_39_S51445
Ca22chr1A_C_albicans_SC5314	macs2	peak	831728	832075	ID=peak_469	wt2_32_S51442,wt2_H2O2_30_S51455,wt3_33_S51443,wt3_H2O2_31_S51454,wt4_38_S51444,wt4_H2O2_39_S51445
Ca22chr1A_C_albicans_SC5314	macs2	peak	833778	833924	ID=peak_470	wt2_H2O2_30_S51455,wt3_H2O2_31_S51454
Ca22chr1A_C_albicans_SC5314	macs2	peak	837442	837678	ID=peak_471	wt2_32_S51442,wt2_H2O2_30_S51455,wt3_33_S51443,wt3_H2O2_31_S51454,wt4_38_S51444,wt4_H2O2_39_S51445
Ca22chr1A_C_albicans_SC5314	macs2	peak	838007	838139	ID=peak_472	wt2_H2O2_30_S51455,wt3_33_S51443,wt3_H2O2_31_S51454
Ca22chr1A_C_albicans_SC5314	macs2	peak	838957	839115	ID=peak_473	wt2_32_S51442,wt2_H2O2_30_S51455,wt3_H2O2_31_S51454
Ca22chr1A_C_albicans_SC5314	macs2	peak	841969	842196	ID=peak_474	wt2_32_S51442,wt2_H2O2_30_S51455,wt3_33_S51443,wt3_H2O2_31_S51454,wt4_38_S51444,wt4_H2O2_39_S51445
Ca22chr1A_C_albicans_SC5314	macs2	peak	842419	842555	ID=peak_475	wt2_32_S51442,wt3_33_S51443,wt4_38_S51444
Ca22chr1A_C_albicans_SC5314	macs2	peak	843982	844191	ID=peak_476	wt2_32_S51442,wt2_H2O2_30_S51455,wt3_33_S51443,wt3_H2O2_31_S51454,wt4_H2O2_39_S51445
Ca22chr1A_C_albicans_SC5314	macs2	peak	845924	846198	ID=peak_477	wt2_32_S51442,wt2_H2O2_30_S51455,wt3_33_S51443,wt3_H2O2_31_S51454,wt4_38_S51444,wt4_H2O2_39_S51445
Ca22chr1A_C_albicans_SC5314	macs2	peak	846566	846653	ID=peak_478	wt2_H2O2_30_S51455
Ca22chr1A_C_albicans_SC5314	macs2	peak	851048	851141	ID=peak_479	wt2_32_S51442,wt3_33_S51443
Ca22chr1A_C_albicans_SC5314	macs2	peak	859225	859434	ID=peak_480	wt2_32_S51442,wt2_H2O2_30_S51455,wt3_33_S51443,wt3_H2O2_31_S51454,wt4_H2O2_39_S51445
Ca22chr1A_C_albicans_SC5314	macs2	peak	860554	860781	ID=peak_481	wt2_32_S51442,wt2_H2O2_30_S51455,wt3_33_S51443,wt3_H2O2_31_S51454
Ca22chr1A_C_albicans_SC5314	macs2	peak	860881	861156	ID=peak_482	wt2_32_S51442,wt2_H2O2_30_S51455,wt3_33_S51443,wt3_H2O2_31_S51454
Ca22chr1A_C_albicans_SC5314	macs2	peak	863856	864008	ID=peak_483	wt2_32_S51442,wt2_H2O2_30_S51455,wt3_33_S51443,wt3_H2O2_31_S51454,wt4_38_S51444,wt4_H2O2_39_S51445
Ca22chr1A_C_albicans_SC5314	macs2	peak	867059	867202	ID=peak_484	wt2_32_S51442,wt2_H2O2_30_S51455,wt3_33_S51443,wt3_H2O2_31_S51454,wt4_38_S51444,wt4_H2O2_39_S51445
Ca22chr1A_C_albicans_SC5314	macs2	peak	870388	870464	ID=peak_485	wt2_32_S51442
Ca22chr1A_C_albicans_SC5314	macs2	peak	871182	871751	ID=peak_486	wt2_32_S51442,wt2_H2O2_30_S51455,wt3_33_S51443,wt3_H2O2_31_S51454,wt4_38_S51444,wt4_H2O2_39_S51445
Ca22chr1A_C_albicans_SC5314	macs2	peak	873805	874047	ID=peak_487	wt2_32_S51442,wt2_H2O2_30_S51455,wt3_33_S51443,wt3_H2O2_31_S51454,wt4_H2O2_39_S51445
Ca22chr1A_C_albicans_SC5314	macs2	peak	875636	875725	ID=peak_488	wt2_H2O2_30_S51455
Ca22chr1A_C_albicans_SC5314	macs2	peak	876036	876262	ID=peak_489	wt2_32_S51442,wt2_H2O2_30_S51455,wt3_33_S51443,wt3_H2O2_31_S51454,wt4_38_S51444,wt4_H2O2_39_S51445
Ca22chr1A_C_albicans_SC5314	macs2	peak	878171	878387	ID=peak_490	wt2_32_S51442,wt2_H2O2_30_S51455,wt3_33_S51443,wt3_H2O2_31_S51454,wt4_38_S51444,wt4_H2O2_39_S51445
Ca22chr1A_C_albicans_SC5314	macs2	peak	879377	879564	ID=peak_491	wt2_32_S51442,wt2_H2O2_30_S51455,wt3_33_S51443,wt3_H2O2_31_S51454,wt4_H2O2_39_S51445
Ca22chr1A_C_albicans_SC5314	macs2	peak	880760	880836	ID=peak_492	wt2_H2O2_30_S51455,wt3_H2O2_31_S51454
Ca22chr1A_C_albicans_SC5314	macs2	peak	881417	882047	ID=peak_493	wt2_32_S51442,wt2_H2O2_30_S51455,wt3_33_S51443,wt3_H2O2_31_S51454,wt4_38_S51444,wt4_H2O2_39_S51445
Ca22chr1A_C_albicans_SC5314	macs2	peak	882721	882819	ID=peak_494	wt2_32_S51442,wt2_H2O2_30_S51455,wt3_33_S51443,wt3_H2O2_31_S51454
Ca22chr1A_C_albicans_SC5314	macs2	peak	884389	884564	ID=peak_495	wt2_32_S51442,wt2_H2O2_30_S51455,wt3_33_S51443,wt3_H2O2_31_S51454,wt4_H2O2_39_S51445
Ca22chr1A_C_albicans_SC5314	macs2	peak	885742	885882	ID=peak_496	wt2_32_S51442,wt2_H2O2_30_S51455,wt3_33_S51443,wt3_H2O2_31_S51454,wt4_38_S51444,wt4_H2O2_39_S51445
Ca22chr1A_C_albicans_SC5314	macs2	peak	888381	888630	ID=peak_497	wt2_32_S51442,wt2_H2O2_30_S51455,wt3_33_S51443,wt3_H2O2_31_S51454
Ca22chr1A_C_albicans_SC5314	macs2	peak	888711	889079	ID=peak_498	wt2_32_S51442,wt2_H2O2_30_S51455,wt3_33_S51443,wt3_H2O2_31_S51454,wt4_38_S51444,wt4_H2O2_39_S51445
Ca22chr1A_C_albicans_SC5314	macs2	peak	889274	890258	ID=peak_499	wt2_32_S51442,wt2_H2O2_30_S51455,wt3_33_S51443,wt3_H2O2_31_S51454,wt4_38_S51444,wt4_H2O2_39_S51445
Ca22chr1A_C_albicans_SC5314	macs2	peak	890388	890475	ID=peak_500	wt2_H2O2_30_S51455
Ca22chr1A_C_albicans_SC5314	macs2	peak	892159	892274	ID=peak_501	wt4_38_S51444
Ca22chr1A_C_albicans_SC5314	macs2	peak	892494	892903	ID=peak_502	wt2_32_S51442,wt2_H2O2_30_S51455,wt3_33_S51443,wt3_H2O2_31_S51454,wt4_38_S51444,wt4_H2O2_39_S51445
Ca22chr1A_C_albicans_SC5314	macs2	peak	893611	893920	ID=peak_503	wt2_32_S51442,wt2_H2O2_30_S51455,wt3_33_S51443,wt3_H2O2_31_S51454,wt4_38_S51444,wt4_H2O2_39_S51445
Ca22chr1A_C_albicans_SC5314	macs2	peak	894026	894286	ID=peak_504	wt2_32_S51442,wt2_H2O2_30_S51455,wt3_33_S51443,wt3_H2O2_31_S51454,wt4_H2O2_39_S51445
Ca22chr1A_C_albicans_SC5314	macs2	peak	894758	895009	ID=peak_505	wt2_32_S51442,wt2_H2O2_30_S51455,wt3_33_S51443,wt3_H2O2_31_S51454,wt4_38_S51444,wt4_H2O2_39_S51445
Ca22chr1A_C_albicans_SC5314	macs2	peak	895869	897812	ID=peak_506	wt2_32_S51442,wt2_H2O2_30_S51455,wt3_33_S51443,wt3_H2O2_31_S51454,wt4_38_S51444,wt4_H2O2_39_S51445
Ca22chr1A_C_albicans_SC5314	macs2	peak	899399	899502	ID=peak_507	wt2_H2O2_30_S51455
Ca22chr1A_C_albicans_SC5314	macs2	peak	901371	901473	ID=peak_508	wt2_H2O2_30_S51455,wt3_H2O2_31_S51454
Ca22chr1A_C_albicans_SC5314	macs2	peak	904223	904313	ID=peak_509	wt2_32_S51442,wt3_33_S51443,wt3_H2O2_31_S51454
Ca22chr1A_C_albicans_SC5314	macs2	peak	905588	905792	ID=peak_510	wt2_32_S51442,wt2_H2O2_30_S51455,wt3_33_S51443,wt3_H2O2_31_S51454,wt4_H2O2_39_S51445
Ca22chr1A_C_albicans_SC5314	macs2	peak	906650	906819	ID=peak_511	wt2_32_S51442,wt2_H2O2_30_S51455,wt3_33_S51443,wt3_H2O2_31_S51454,wt4_38_S51444,wt4_H2O2_39_S51445
Ca22chr1A_C_albicans_SC5314	macs2	peak	910882	911010	ID=peak_512	wt2_H2O2_30_S51455
Ca22chr1A_C_albicans_SC5314	macs2	peak	913776	914569	ID=peak_513	wt2_32_S51442,wt2_H2O2_30_S51455,wt3_33_S51443,wt3_H2O2_31_S51454,wt4_38_S51444,wt4_H2O2_39_S51445
Ca22chr1A_C_albicans_SC5314	macs2	peak	915137	915237	ID=peak_514	wt2_32_S51442,wt2_H2O2_30_S51455,wt3_33_S51443,wt3_H2O2_31_S51454
Ca22chr1A_C_albicans_SC5314	macs2	peak	916155	916300	ID=peak_515	wt2_32_S51442,wt2_H2O2_30_S51455
Ca22chr1A_C_albicans_SC5314	macs2	peak	918371	918654	ID=peak_516	wt2_32_S51442,wt2_H2O2_30_S51455,wt3_33_S51443,wt3_H2O2_31_S51454,wt4_38_S51444,wt4_H2O2_39_S51445
Ca22chr1A_C_albicans_SC5314	macs2	peak	919029	919109	ID=peak_517	wt4_38_S51444
Ca22chr1A_C_albicans_SC5314	macs2	peak	919707	919822	ID=peak_518	wt2_32_S51442,wt2_H2O2_30_S51455,wt3_33_S51443,wt3_H2O2_31_S51454,wt4_38_S51444,wt4_H2O2_39_S51445
Ca22chr1A_C_albicans_SC5314	macs2	peak	920047	920185	ID=peak_519	wt4_38_S51444
Ca22chr1A_C_albicans_SC5314	macs2	peak	920804	920927	ID=peak_520	wt2_32_S51442,wt2_H2O2_30_S51455,wt3_33_S51443,wt3_H2O2_31_S51454
Ca22chr1A_C_albicans_SC5314	macs2	peak	921061	921364	ID=peak_521	wt2_32_S51442,wt2_H2O2_30_S51455,wt3_33_S51443,wt3_H2O2_31_S51454,wt4_38_S51444,wt4_H2O2_39_S51445
Ca22chr1A_C_albicans_SC5314	macs2	peak	921443	921567	ID=peak_522	wt2_H2O2_30_S51455,wt3_H2O2_31_S51454,wt4_H2O2_39_S51445
Ca22chr1A_C_albicans_SC5314	macs2	peak	926183	926558	ID=peak_523	wt2_32_S51442,wt2_H2O2_30_S51455,wt3_33_S51443,wt3_H2O2_31_S51454,wt4_38_S51444,wt4_H2O2_39_S51445
Ca22chr1A_C_albicans_SC5314	macs2	peak	926695	926790	ID=peak_524	wt2_32_S51442,wt2_H2O2_30_S51455,wt3_H2O2_31_S51454
Ca22chr1A_C_albicans_SC5314	macs2	peak	927860	928616	ID=peak_525	wt2_32_S51442,wt2_H2O2_30_S51455,wt3_33_S51443,wt3_H2O2_31_S51454,wt4_H2O2_39_S51445
Ca22chr1A_C_albicans_SC5314	macs2	peak	928716	928972	ID=peak_526	wt2_32_S51442,wt2_H2O2_30_S51455,wt3_33_S51443,wt3_H2O2_31_S51454,wt4_H2O2_39_S51445
Ca22chr1A_C_albicans_SC5314	macs2	peak	930171	930763	ID=peak_527	wt2_H2O2_30_S51455,wt3_H2O2_31_S51454
Ca22chr1A_C_albicans_SC5314	macs2	peak	930989	931073	ID=peak_528	wt3_H2O2_31_S51454
Ca22chr1A_C_albicans_SC5314	macs2	peak	933876	934082	ID=peak_529	wt2_32_S51442,wt2_H2O2_30_S51455,wt3_33_S51443,wt3_H2O2_31_S51454
Ca22chr1A_C_albicans_SC5314	macs2	peak	938936	939066	ID=peak_530	wt2_32_S51442,wt2_H2O2_30_S51455,wt3_33_S51443,wt3_H2O2_31_S51454
Ca22chr1A_C_albicans_SC5314	macs2	peak	939745	939874	ID=peak_531	wt2_32_S51442,wt2_H2O2_30_S51455,wt3_33_S51443,wt3_H2O2_31_S51454,wt4_H2O2_39_S51445
Ca22chr1A_C_albicans_SC5314	macs2	peak	944406	945063	ID=peak_532	wt2_32_S51442,wt2_H2O2_30_S51455,wt3_33_S51443,wt3_H2O2_31_S51454,wt4_38_S51444,wt4_H2O2_39_S51445
Ca22chr1A_C_albicans_SC5314	macs2	peak	945225	946177	ID=peak_533	wt2_32_S51442,wt2_H2O2_30_S51455,wt3_33_S51443,wt3_H2O2_31_S51454,wt4_38_S51444,wt4_H2O2_39_S51445
Ca22chr1A_C_albicans_SC5314	macs2	peak	946784	947063	ID=peak_534	wt2_32_S51442,wt2_H2O2_30_S51455,wt3_33_S51443,wt3_H2O2_31_S51454,wt4_38_S51444,wt4_H2O2_39_S51445
Ca22chr1A_C_albicans_SC5314	macs2	peak	949041	949205	ID=peak_535	wt2_32_S51442,wt2_H2O2_30_S51455,wt3_33_S51443,wt3_H2O2_31_S51454,wt4_H2O2_39_S51445
Ca22chr1A_C_albicans_SC5314	macs2	peak	951939	952088	ID=peak_536	wt2_32_S51442,wt2_H2O2_30_S51455,wt3_33_S51443
Ca22chr1A_C_albicans_SC5314	macs2	peak	957825	957910	ID=peak_537	wt2_32_S51442
Ca22chr1A_C_albicans_SC5314	macs2	peak	958615	958730	ID=peak_538	wt2_32_S51442,wt2_H2O2_30_S51455,wt3_33_S51443,wt3_H2O2_31_S51454,wt4_H2O2_39_S51445
Ca22chr1A_C_albicans_SC5314	macs2	peak	963332	963411	ID=peak_539	wt2_32_S51442
Ca22chr1A_C_albicans_SC5314	macs2	peak	964271	964582	ID=peak_540	wt2_32_S51442,wt2_H2O2_30_S51455,wt3_33_S51443,wt3_H2O2_31_S51454
Ca22chr1A_C_albicans_SC5314	macs2	peak	964759	964955	ID=peak_541	wt2_32_S51442,wt2_H2O2_30_S51455,wt3_33_S51443,wt3_H2O2_31_S51454,wt4_38_S51444
Ca22chr1A_C_albicans_SC5314	macs2	peak	968296	968439	ID=peak_542	wt4_H2O2_39_S51445
Ca22chr1A_C_albicans_SC5314	macs2	peak	970671	970846	ID=peak_543	wt2_32_S51442,wt2_H2O2_30_S51455,wt3_33_S51443,wt3_H2O2_31_S51454,wt4_H2O2_39_S51445
Ca22chr1A_C_albicans_SC5314	macs2	peak	972125	973065	ID=peak_544	wt2_32_S51442,wt2_H2O2_30_S51455,wt3_33_S51443,wt3_H2O2_31_S51454,wt4_38_S51444,wt4_H2O2_39_S51445
Ca22chr1A_C_albicans_SC5314	macs2	peak	973223	973359	ID=peak_545	wt2_32_S51442,wt2_H2O2_30_S51455,wt3_33_S51443,wt3_H2O2_31_S51454
Ca22chr1A_C_albicans_SC5314	macs2	peak	974799	974916	ID=peak_546	wt2_32_S51442,wt3_33_S51443
Ca22chr1A_C_albicans_SC5314	macs2	peak	980101	980198	ID=peak_547	wt2_32_S51442,wt2_H2O2_30_S51455
Ca22chr1A_C_albicans_SC5314	macs2	peak	981199	981310	ID=peak_548	wt2_32_S51442,wt2_H2O2_30_S51455,wt3_33_S51443
Ca22chr1A_C_albicans_SC5314	macs2	peak	983920	984052	ID=peak_549	wt2_32_S51442,wt3_33_S51443,wt3_H2O2_31_S51454
Ca22chr1A_C_albicans_SC5314	macs2	peak	985857	986100	ID=peak_550	wt2_32_S51442,wt2_H2O2_30_S51455,wt3_33_S51443,wt3_H2O2_31_S51454,wt4_38_S51444
Ca22chr1A_C_albicans_SC5314	macs2	peak	990547	990822	ID=peak_551	wt2_32_S51442,wt2_H2O2_30_S51455,wt3_33_S51443,wt3_H2O2_31_S51454
Ca22chr1A_C_albicans_SC5314	macs2	peak	993300	994037	ID=peak_552	wt2_32_S51442,wt2_H2O2_30_S51455,wt3_33_S51443,wt3_H2O2_31_S51454,wt4_38_S51444,wt4_H2O2_39_S51445
Ca22chr1A_C_albicans_SC5314	macs2	peak	997134	997252	ID=peak_553	wt2_32_S51442,wt2_H2O2_30_S51455
Ca22chr1A_C_albicans_SC5314	macs2	peak	1001422	1001537	ID=peak_554	wt2_32_S51442,wt2_H2O2_30_S51455
Ca22chr1A_C_albicans_SC5314	macs2	peak	1004220	1004424	ID=peak_555	wt2_32_S51442,wt2_H2O2_30_S51455,wt3_33_S51443,wt3_H2O2_31_S51454,wt4_38_S51444,wt4_H2O2_39_S51445
Ca22chr1A_C_albicans_SC5314	macs2	peak	1007592	1007682	ID=peak_556	wt4_38_S51444
Ca22chr1A_C_albicans_SC5314	macs2	peak	1008447	1008856	ID=peak_557	wt2_32_S51442,wt2_H2O2_30_S51455,wt3_33_S51443,wt3_H2O2_31_S51454,wt4_38_S51444,wt4_H2O2_39_S51445
Ca22chr1A_C_albicans_SC5314	macs2	peak	1012213	1012591	ID=peak_558	wt2_32_S51442,wt2_H2O2_30_S51455,wt3_33_S51443,wt3_H2O2_31_S51454,wt4_38_S51444,wt4_H2O2_39_S51445
Ca22chr1A_C_albicans_SC5314	macs2	peak	1015519	1015684	ID=peak_559	wt2_32_S51442,wt2_H2O2_30_S51455,wt3_33_S51443,wt3_H2O2_31_S51454,wt4_38_S51444,wt4_H2O2_39_S51445
Ca22chr1A_C_albicans_SC5314	macs2	peak	1016981	1017188	ID=peak_560	wt2_32_S51442,wt2_H2O2_30_S51455,wt3_33_S51443,wt3_H2O2_31_S51454
Ca22chr1A_C_albicans_SC5314	macs2	peak	1021193	1021686	ID=peak_561	wt2_32_S51442,wt2_H2O2_30_S51455,wt3_33_S51443,wt3_H2O2_31_S51454,wt4_38_S51444,wt4_H2O2_39_S51445
Ca22chr1A_C_albicans_SC5314	macs2	peak	1022475	1022620	ID=peak_562	wt2_32_S51442,wt2_H2O2_30_S51455,wt3_33_S51443,wt3_H2O2_31_S51454,wt4_H2O2_39_S51445
Ca22chr1A_C_albicans_SC5314	macs2	peak	1024135	1024238	ID=peak_563	wt2_32_S51442,wt3_33_S51443
Ca22chr1A_C_albicans_SC5314	macs2	peak	1024829	1024971	ID=peak_564	wt2_32_S51442,wt3_33_S51443
Ca22chr1A_C_albicans_SC5314	macs2	peak	1025146	1025237	ID=peak_565	wt2_32_S51442,wt4_H2O2_39_S51445
Ca22chr1A_C_albicans_SC5314	macs2	peak	1032737	1033218	ID=peak_566	wt2_32_S51442,wt2_H2O2_30_S51455,wt3_33_S51443,wt3_H2O2_31_S51454,wt4_H2O2_39_S51445
Ca22chr1A_C_albicans_SC5314	macs2	peak	1033287	1033752	ID=peak_567	wt2_32_S51442,wt2_H2O2_30_S51455,wt3_33_S51443,wt3_H2O2_31_S51454,wt4_38_S51444,wt4_H2O2_39_S51445
Ca22chr1A_C_albicans_SC5314	macs2	peak	1035908	1036113	ID=peak_568	wt2_32_S51442,wt2_H2O2_30_S51455,wt3_33_S51443,wt3_H2O2_31_S51454,wt4_38_S51444,wt4_H2O2_39_S51445
Ca22chr1A_C_albicans_SC5314	macs2	peak	1036442	1036702	ID=peak_569	wt2_32_S51442,wt2_H2O2_30_S51455,wt3_33_S51443,wt3_H2O2_31_S51454,wt4_38_S51444,wt4_H2O2_39_S51445
Ca22chr1A_C_albicans_SC5314	macs2	peak	1043528	1043728	ID=peak_570	wt2_32_S51442,wt2_H2O2_30_S51455,wt3_33_S51443,wt3_H2O2_31_S51454,wt4_H2O2_39_S51445
Ca22chr1A_C_albicans_SC5314	macs2	peak	1046261	1046992	ID=peak_571	wt2_32_S51442,wt2_H2O2_30_S51455,wt3_33_S51443,wt3_H2O2_31_S51454,wt4_38_S51444,wt4_H2O2_39_S51445
Ca22chr1A_C_albicans_SC5314	macs2	peak	1047230	1047686	ID=peak_572	wt2_32_S51442,wt2_H2O2_30_S51455,wt3_33_S51443,wt3_H2O2_31_S51454,wt4_H2O2_39_S51445
Ca22chr1A_C_albicans_SC5314	macs2	peak	1047790	1047988	ID=peak_573	wt2_32_S51442,wt2_H2O2_30_S51455,wt3_33_S51443,wt3_H2O2_31_S51454
Ca22chr1A_C_albicans_SC5314	macs2	peak	1051578	1051898	ID=peak_574	wt2_32_S51442,wt2_H2O2_30_S51455,wt3_33_S51443,wt3_H2O2_31_S51454,wt4_H2O2_39_S51445
Ca22chr1A_C_albicans_SC5314	macs2	peak	1053790	1053870	ID=peak_575	wt2_32_S51442,wt2_H2O2_30_S51455,wt3_33_S51443,wt3_H2O2_31_S51454
Ca22chr1A_C_albicans_SC5314	macs2	peak	1054877	1054954	ID=peak_576	wt2_32_S51442
Ca22chr1A_C_albicans_SC5314	macs2	peak	1055117	1055256	ID=peak_577	wt2_32_S51442,wt2_H2O2_30_S51455,wt3_33_S51443,wt3_H2O2_31_S51454
Ca22chr1A_C_albicans_SC5314	macs2	peak	1057774	1057867	ID=peak_578	wt2_32_S51442,wt2_H2O2_30_S51455,wt3_33_S51443,wt3_H2O2_31_S51454,wt4_H2O2_39_S51445
Ca22chr1A_C_albicans_SC5314	macs2	peak	1061962	1062087	ID=peak_579	wt2_32_S51442,wt2_H2O2_30_S51455,wt3_33_S51443,wt3_H2O2_31_S51454,wt4_38_S51444
Ca22chr1A_C_albicans_SC5314	macs2	peak	1062511	1062868	ID=peak_580	wt2_32_S51442,wt2_H2O2_30_S51455,wt3_33_S51443,wt3_H2O2_31_S51454,wt4_38_S51444,wt4_H2O2_39_S51445
Ca22chr1A_C_albicans_SC5314	macs2	peak	1063129	1063400	ID=peak_581	wt2_32_S51442,wt2_H2O2_30_S51455,wt3_33_S51443,wt3_H2O2_31_S51454,wt4_38_S51444
Ca22chr1A_C_albicans_SC5314	macs2	peak	1063557	1063639	ID=peak_582	wt2_32_S51442
Ca22chr1A_C_albicans_SC5314	macs2	peak	1065887	1066019	ID=peak_583	wt2_32_S51442,wt2_H2O2_30_S51455,wt3_33_S51443,wt3_H2O2_31_S51454,wt4_H2O2_39_S51445
Ca22chr1A_C_albicans_SC5314	macs2	peak	1067389	1067468	ID=peak_584	wt2_32_S51442
Ca22chr1A_C_albicans_SC5314	macs2	peak	1068200	1068334	ID=peak_585	wt2_H2O2_30_S51455,wt3_H2O2_31_S51454
Ca22chr1A_C_albicans_SC5314	macs2	peak	1069812	1070458	ID=peak_586	wt2_32_S51442,wt2_H2O2_30_S51455,wt3_33_S51443,wt3_H2O2_31_S51454,wt4_38_S51444,wt4_H2O2_39_S51445
Ca22chr1A_C_albicans_SC5314	macs2	peak	1072438	1072566	ID=peak_587	wt2_32_S51442,wt2_H2O2_30_S51455,wt3_33_S51443,wt3_H2O2_31_S51454
Ca22chr1A_C_albicans_SC5314	macs2	peak	1072815	1072911	ID=peak_588	wt2_32_S51442
Ca22chr1A_C_albicans_SC5314	macs2	peak	1073810	1073966	ID=peak_589	wt2_32_S51442,wt2_H2O2_30_S51455,wt3_33_S51443,wt3_H2O2_31_S51454
Ca22chr1A_C_albicans_SC5314	macs2	peak	1074098	1074608	ID=peak_590	wt2_32_S51442,wt2_H2O2_30_S51455,wt3_33_S51443,wt3_H2O2_31_S51454,wt4_H2O2_39_S51445
Ca22chr1A_C_albicans_SC5314	macs2	peak	1074856	1076512	ID=peak_591	wt2_32_S51442,wt2_H2O2_30_S51455,wt3_33_S51443,wt3_H2O2_31_S51454,wt4_38_S51444,wt4_H2O2_39_S51445
Ca22chr1A_C_albicans_SC5314	macs2	peak	1080235	1082389	ID=peak_592	wt2_32_S51442,wt2_H2O2_30_S51455,wt3_33_S51443,wt3_H2O2_31_S51454,wt4_38_S51444,wt4_H2O2_39_S51445
Ca22chr1A_C_albicans_SC5314	macs2	peak	1083424	1083517	ID=peak_593	wt4_H2O2_39_S51445
Ca22chr1A_C_albicans_SC5314	macs2	peak	1083804	1083910	ID=peak_594	wt2_H2O2_30_S51455
Ca22chr1A_C_albicans_SC5314	macs2	peak	1084142	1084294	ID=peak_595	wt2_H2O2_30_S51455
Ca22chr1A_C_albicans_SC5314	macs2	peak	1084486	1084624	ID=peak_596	wt2_32_S51442,wt2_H2O2_30_S51455,wt3_33_S51443,wt3_H2O2_31_S51454,wt4_38_S51444,wt4_H2O2_39_S51445
Ca22chr1A_C_albicans_SC5314	macs2	peak	1085436	1085596	ID=peak_597	wt2_H2O2_30_S51455,wt3_H2O2_31_S51454,wt4_H2O2_39_S51445
Ca22chr1A_C_albicans_SC5314	macs2	peak	1085710	1087096	ID=peak_598	wt2_32_S51442,wt2_H2O2_30_S51455,wt3_33_S51443,wt3_H2O2_31_S51454,wt4_38_S51444,wt4_H2O2_39_S51445
Ca22chr1A_C_albicans_SC5314	macs2	peak	1087258	1087788	ID=peak_599	wt2_32_S51442,wt2_H2O2_30_S51455,wt3_33_S51443,wt3_H2O2_31_S51454,wt4_38_S51444,wt4_H2O2_39_S51445
Ca22chr1A_C_albicans_SC5314	macs2	peak	1087865	1092429	ID=peak_600	wt2_32_S51442,wt2_H2O2_30_S51455,wt3_33_S51443,wt3_H2O2_31_S51454,wt4_38_S51444,wt4_H2O2_39_S51445
Ca22chr1A_C_albicans_SC5314	macs2	peak	1093391	1093535	ID=peak_601	wt4_H2O2_39_S51445
Ca22chr1A_C_albicans_SC5314	macs2	peak	1093968	1094563	ID=peak_602	wt2_32_S51442,wt2_H2O2_30_S51455,wt3_33_S51443,wt3_H2O2_31_S51454,wt4_38_S51444,wt4_H2O2_39_S51445
Ca22chr1A_C_albicans_SC5314	macs2	peak	1094656	1094803	ID=peak_603	wt2_H2O2_30_S51455,wt4_H2O2_39_S51445
Ca22chr1A_C_albicans_SC5314	macs2	peak	1095992	1096193	ID=peak_604	wt2_32_S51442,wt2_H2O2_30_S51455,wt3_33_S51443,wt3_H2O2_31_S51454,wt4_38_S51444,wt4_H2O2_39_S51445
Ca22chr1A_C_albicans_SC5314	macs2	peak	1096741	1096818	ID=peak_605	wt2_H2O2_30_S51455
Ca22chr1A_C_albicans_SC5314	macs2	peak	1097632	1097834	ID=peak_606	wt2_32_S51442,wt2_H2O2_30_S51455,wt3_33_S51443,wt3_H2O2_31_S51454,wt4_38_S51444,wt4_H2O2_39_S51445
Ca22chr1A_C_albicans_SC5314	macs2	peak	1098644	1098780	ID=peak_607	wt2_H2O2_30_S51455,wt3_H2O2_31_S51454
Ca22chr1A_C_albicans_SC5314	macs2	peak	1100166	1100480	ID=peak_608	wt2_32_S51442,wt2_H2O2_30_S51455,wt3_33_S51443,wt3_H2O2_31_S51454,wt4_H2O2_39_S51445
Ca22chr1A_C_albicans_SC5314	macs2	peak	1102439	1102649	ID=peak_609	wt2_32_S51442,wt2_H2O2_30_S51455,wt3_33_S51443,wt3_H2O2_31_S51454,wt4_H2O2_39_S51445
Ca22chr1A_C_albicans_SC5314	macs2	peak	1105398	1105627	ID=peak_610	wt2_32_S51442,wt2_H2O2_30_S51455,wt3_33_S51443,wt3_H2O2_31_S51454,wt4_38_S51444,wt4_H2O2_39_S51445
Ca22chr1A_C_albicans_SC5314	macs2	peak	1107666	1107936	ID=peak_611	wt2_H2O2_30_S51455,wt3_H2O2_31_S51454
Ca22chr1A_C_albicans_SC5314	macs2	peak	1108971	1109045	ID=peak_612	wt2_32_S51442,wt3_H2O2_31_S51454
Ca22chr1A_C_albicans_SC5314	macs2	peak	1110943	1111081	ID=peak_613	wt2_32_S51442,wt2_H2O2_30_S51455,wt3_H2O2_31_S51454
Ca22chr1A_C_albicans_SC5314	macs2	peak	1115447	1115635	ID=peak_614	wt2_32_S51442,wt2_H2O2_30_S51455,wt3_33_S51443,wt3_H2O2_31_S51454,wt4_38_S51444,wt4_H2O2_39_S51445
Ca22chr1A_C_albicans_SC5314	macs2	peak	1115978	1116480	ID=peak_615	wt2_32_S51442,wt2_H2O2_30_S51455,wt3_33_S51443,wt3_H2O2_31_S51454,wt4_38_S51444,wt4_H2O2_39_S51445
Ca22chr1A_C_albicans_SC5314	macs2	peak	1116574	1116760	ID=peak_616	wt2_32_S51442
Ca22chr1A_C_albicans_SC5314	macs2	peak	1118118	1118190	ID=peak_617	wt2_32_S51442,wt2_H2O2_30_S51455,wt3_H2O2_31_S51454
Ca22chr1A_C_albicans_SC5314	macs2	peak	1119426	1119533	ID=peak_618	wt4_38_S51444
Ca22chr1A_C_albicans_SC5314	macs2	peak	1119702	1119803	ID=peak_619	wt2_32_S51442,wt2_H2O2_30_S51455,wt3_H2O2_31_S51454
Ca22chr1A_C_albicans_SC5314	macs2	peak	1122459	1122766	ID=peak_620	wt2_32_S51442,wt2_H2O2_30_S51455,wt3_33_S51443,wt3_H2O2_31_S51454,wt4_38_S51444,wt4_H2O2_39_S51445
Ca22chr1A_C_albicans_SC5314	macs2	peak	1123029	1123122	ID=peak_621	wt3_H2O2_31_S51454
Ca22chr1A_C_albicans_SC5314	macs2	peak	1128150	1128326	ID=peak_622	wt2_32_S51442,wt2_H2O2_30_S51455,wt3_33_S51443,wt3_H2O2_31_S51454,wt4_38_S51444,wt4_H2O2_39_S51445
Ca22chr1A_C_albicans_SC5314	macs2	peak	1137141	1137255	ID=peak_623	wt2_32_S51442,wt3_H2O2_31_S51454
Ca22chr1A_C_albicans_SC5314	macs2	peak	1142980	1143177	ID=peak_624	wt2_32_S51442,wt2_H2O2_30_S51455,wt3_33_S51443,wt3_H2O2_31_S51454,wt4_38_S51444,wt4_H2O2_39_S51445
Ca22chr1A_C_albicans_SC5314	macs2	peak	1143287	1143445	ID=peak_625	wt2_H2O2_30_S51455,wt3_H2O2_31_S51454
Ca22chr1A_C_albicans_SC5314	macs2	peak	1148341	1148476	ID=peak_626	wt2_32_S51442,wt2_H2O2_30_S51455,wt3_33_S51443,wt3_H2O2_31_S51454,wt4_H2O2_39_S51445
Ca22chr1A_C_albicans_SC5314	macs2	peak	1152514	1152691	ID=peak_627	wt2_32_S51442,wt2_H2O2_30_S51455,wt3_33_S51443,wt3_H2O2_31_S51454,wt4_H2O2_39_S51445
Ca22chr1A_C_albicans_SC5314	macs2	peak	1155894	1156061	ID=peak_628	wt2_H2O2_30_S51455,wt3_H2O2_31_S51454
Ca22chr1A_C_albicans_SC5314	macs2	peak	1157059	1157284	ID=peak_629	wt2_32_S51442,wt2_H2O2_30_S51455,wt3_33_S51443,wt3_H2O2_31_S51454
Ca22chr1A_C_albicans_SC5314	macs2	peak	1157879	1157981	ID=peak_630	wt2_32_S51442,wt2_H2O2_30_S51455,wt3_33_S51443,wt3_H2O2_31_S51454,wt4_38_S51444
Ca22chr1A_C_albicans_SC5314	macs2	peak	1163023	1163306	ID=peak_631	wt2_32_S51442,wt2_H2O2_30_S51455,wt3_33_S51443,wt3_H2O2_31_S51454,wt4_38_S51444,wt4_H2O2_39_S51445
Ca22chr1A_C_albicans_SC5314	macs2	peak	1163640	1163719	ID=peak_632	wt4_38_S51444
Ca22chr1A_C_albicans_SC5314	macs2	peak	1164695	1166427	ID=peak_633	wt2_32_S51442,wt2_H2O2_30_S51455,wt3_33_S51443,wt3_H2O2_31_S51454,wt4_38_S51444,wt4_H2O2_39_S51445
Ca22chr1A_C_albicans_SC5314	macs2	peak	1166743	1166967	ID=peak_634	wt2_32_S51442,wt2_H2O2_30_S51455,wt3_33_S51443,wt3_H2O2_31_S51454,wt4_38_S51444,wt4_H2O2_39_S51445
Ca22chr1A_C_albicans_SC5314	macs2	peak	1167979	1169107	ID=peak_635	wt2_32_S51442,wt2_H2O2_30_S51455,wt3_33_S51443,wt3_H2O2_31_S51454,wt4_38_S51444,wt4_H2O2_39_S51445
Ca22chr1A_C_albicans_SC5314	macs2	peak	1169712	1169779	ID=peak_636	wt4_38_S51444
Ca22chr1A_C_albicans_SC5314	macs2	peak	1170697	1170774	ID=peak_637	wt2_H2O2_30_S51455
Ca22chr1A_C_albicans_SC5314	macs2	peak	1174143	1174213	ID=peak_638	wt3_H2O2_31_S51454
Ca22chr1A_C_albicans_SC5314	macs2	peak	1187996	1188146	ID=peak_639	wt2_32_S51442,wt2_H2O2_30_S51455,wt3_33_S51443,wt3_H2O2_31_S51454,wt4_38_S51444,wt4_H2O2_39_S51445
Ca22chr1A_C_albicans_SC5314	macs2	peak	1190021	1190199	ID=peak_640	wt2_32_S51442,wt2_H2O2_30_S51455,wt3_33_S51443,wt3_H2O2_31_S51454,wt4_38_S51444,wt4_H2O2_39_S51445
Ca22chr1A_C_albicans_SC5314	macs2	peak	1191019	1191254	ID=peak_641	wt2_32_S51442,wt2_H2O2_30_S51455,wt3_33_S51443,wt3_H2O2_31_S51454,wt4_38_S51444,wt4_H2O2_39_S51445
Ca22chr1A_C_albicans_SC5314	macs2	peak	1194880	1195143	ID=peak_642	wt2_32_S51442,wt2_H2O2_30_S51455,wt3_33_S51443,wt3_H2O2_31_S51454
Ca22chr1A_C_albicans_SC5314	macs2	peak	1204835	1205033	ID=peak_643	wt2_32_S51442
Ca22chr1A_C_albicans_SC5314	macs2	peak	1205409	1205536	ID=peak_644	wt2_32_S51442
Ca22chr1A_C_albicans_SC5314	macs2	peak	1207839	1207933	ID=peak_645	wt2_32_S51442,wt2_H2O2_30_S51455
Ca22chr1A_C_albicans_SC5314	macs2	peak	1208304	1208377	ID=peak_646	wt2_32_S51442
Ca22chr1A_C_albicans_SC5314	macs2	peak	1210484	1210632	ID=peak_647	wt2_32_S51442,wt2_H2O2_30_S51455,wt3_33_S51443,wt3_H2O2_31_S51454,wt4_H2O2_39_S51445
Ca22chr1A_C_albicans_SC5314	macs2	peak	1213769	1213847	ID=peak_648	wt2_32_S51442,wt3_33_S51443
Ca22chr1A_C_albicans_SC5314	macs2	peak	1214676	1215275	ID=peak_649	wt2_32_S51442,wt2_H2O2_30_S51455,wt3_33_S51443,wt3_H2O2_31_S51454,wt4_38_S51444,wt4_H2O2_39_S51445
Ca22chr1A_C_albicans_SC5314	macs2	peak	1216562	1216723	ID=peak_650	wt2_32_S51442,wt2_H2O2_30_S51455,wt3_33_S51443,wt3_H2O2_31_S51454,wt4_38_S51444,wt4_H2O2_39_S51445
Ca22chr1A_C_albicans_SC5314	macs2	peak	1217998	1218165	ID=peak_651	wt2_32_S51442,wt2_H2O2_30_S51455,wt3_33_S51443,wt3_H2O2_31_S51454
Ca22chr1A_C_albicans_SC5314	macs2	peak	1219246	1219663	ID=peak_652	wt2_32_S51442,wt2_H2O2_30_S51455,wt3_33_S51443,wt3_H2O2_31_S51454,wt4_38_S51444,wt4_H2O2_39_S51445
Ca22chr1A_C_albicans_SC5314	macs2	peak	1220929	1221356	ID=peak_653	wt2_32_S51442,wt2_H2O2_30_S51455,wt3_33_S51443,wt3_H2O2_31_S51454,wt4_38_S51444,wt4_H2O2_39_S51445
Ca22chr1A_C_albicans_SC5314	macs2	peak	1225267	1225910	ID=peak_654	wt2_32_S51442,wt2_H2O2_30_S51455,wt3_33_S51443,wt3_H2O2_31_S51454,wt4_38_S51444,wt4_H2O2_39_S51445
Ca22chr1A_C_albicans_SC5314	macs2	peak	1226204	1226305	ID=peak_655	wt2_32_S51442,wt3_33_S51443
Ca22chr1A_C_albicans_SC5314	macs2	peak	1230145	1230309	ID=peak_656	wt2_32_S51442,wt2_H2O2_30_S51455,wt3_33_S51443,wt3_H2O2_31_S51454,wt4_H2O2_39_S51445
Ca22chr1A_C_albicans_SC5314	macs2	peak	1230936	1231022	ID=peak_657	wt2_32_S51442,wt2_H2O2_30_S51455,wt3_33_S51443
Ca22chr1A_C_albicans_SC5314	macs2	peak	1234338	1234417	ID=peak_658	wt2_32_S51442
Ca22chr1A_C_albicans_SC5314	macs2	peak	1235161	1235310	ID=peak_659	wt2_32_S51442,wt2_H2O2_30_S51455,wt3_33_S51443,wt3_H2O2_31_S51454
Ca22chr1A_C_albicans_SC5314	macs2	peak	1235653	1235954	ID=peak_660	wt2_32_S51442,wt2_H2O2_30_S51455,wt3_33_S51443,wt3_H2O2_31_S51454,wt4_38_S51444,wt4_H2O2_39_S51445
Ca22chr1A_C_albicans_SC5314	macs2	peak	1242216	1242287	ID=peak_661	wt2_H2O2_30_S51455
Ca22chr1A_C_albicans_SC5314	macs2	peak	1242684	1242999	ID=peak_662	wt2_32_S51442,wt2_H2O2_30_S51455,wt3_33_S51443,wt3_H2O2_31_S51454,wt4_H2O2_39_S51445
Ca22chr1A_C_albicans_SC5314	macs2	peak	1243353	1244065	ID=peak_663	wt2_32_S51442,wt2_H2O2_30_S51455,wt3_33_S51443,wt3_H2O2_31_S51454,wt4_38_S51444,wt4_H2O2_39_S51445
Ca22chr1A_C_albicans_SC5314	macs2	peak	1244160	1244347	ID=peak_664	wt2_32_S51442,wt2_H2O2_30_S51455,wt3_33_S51443
Ca22chr1A_C_albicans_SC5314	macs2	peak	1250132	1250326	ID=peak_665	wt2_32_S51442,wt2_H2O2_30_S51455,wt3_33_S51443,wt3_H2O2_31_S51454,wt4_38_S51444,wt4_H2O2_39_S51445
Ca22chr1A_C_albicans_SC5314	macs2	peak	1250397	1251147	ID=peak_666	wt2_32_S51442,wt2_H2O2_30_S51455,wt3_33_S51443,wt3_H2O2_31_S51454,wt4_38_S51444,wt4_H2O2_39_S51445
Ca22chr1A_C_albicans_SC5314	macs2	peak	1256871	1256944	ID=peak_667	wt2_H2O2_30_S51455
Ca22chr1A_C_albicans_SC5314	macs2	peak	1260471	1260589	ID=peak_668	wt2_32_S51442,wt2_H2O2_30_S51455,wt3_33_S51443,wt3_H2O2_31_S51454,wt4_H2O2_39_S51445
Ca22chr1A_C_albicans_SC5314	macs2	peak	1263414	1263800	ID=peak_669	wt2_32_S51442,wt2_H2O2_30_S51455,wt3_33_S51443,wt3_H2O2_31_S51454,wt4_38_S51444,wt4_H2O2_39_S51445
Ca22chr1A_C_albicans_SC5314	macs2	peak	1265269	1265345	ID=peak_670	wt2_H2O2_30_S51455
Ca22chr1A_C_albicans_SC5314	macs2	peak	1271727	1271825	ID=peak_671	wt2_32_S51442,wt2_H2O2_30_S51455
Ca22chr1A_C_albicans_SC5314	macs2	peak	1272672	1272800	ID=peak_672	wt2_32_S51442,wt2_H2O2_30_S51455,wt3_33_S51443
Ca22chr1A_C_albicans_SC5314	macs2	peak	1274554	1274677	ID=peak_673	wt2_32_S51442,wt2_H2O2_30_S51455,wt3_33_S51443,wt3_H2O2_31_S51454,wt4_H2O2_39_S51445
Ca22chr1A_C_albicans_SC5314	macs2	peak	1278061	1278399	ID=peak_674	wt2_32_S51442,wt2_H2O2_30_S51455,wt3_33_S51443,wt3_H2O2_31_S51454,wt4_38_S51444,wt4_H2O2_39_S51445
Ca22chr1A_C_albicans_SC5314	macs2	peak	1280822	1281122	ID=peak_675	wt2_32_S51442,wt2_H2O2_30_S51455,wt3_33_S51443,wt3_H2O2_31_S51454,wt4_38_S51444,wt4_H2O2_39_S51445
Ca22chr1A_C_albicans_SC5314	macs2	peak	1285580	1285843	ID=peak_676	wt2_32_S51442,wt2_H2O2_30_S51455,wt3_33_S51443,wt3_H2O2_31_S51454,wt4_38_S51444,wt4_H2O2_39_S51445
Ca22chr1A_C_albicans_SC5314	macs2	peak	1286016	1286186	ID=peak_677	wt2_32_S51442,wt3_H2O2_31_S51454
Ca22chr1A_C_albicans_SC5314	macs2	peak	1286517	1286694	ID=peak_678	wt2_32_S51442,wt2_H2O2_30_S51455,wt3_33_S51443,wt3_H2O2_31_S51454,wt4_38_S51444
Ca22chr1A_C_albicans_SC5314	macs2	peak	1286883	1287529	ID=peak_679	wt2_32_S51442,wt2_H2O2_30_S51455,wt3_33_S51443,wt3_H2O2_31_S51454,wt4_H2O2_39_S51445
Ca22chr1A_C_albicans_SC5314	macs2	peak	1292035	1292164	ID=peak_680	wt2_32_S51442,wt2_H2O2_30_S51455,wt3_33_S51443,wt3_H2O2_31_S51454
Ca22chr1A_C_albicans_SC5314	macs2	peak	1292360	1292673	ID=peak_681	wt2_32_S51442,wt2_H2O2_30_S51455,wt3_33_S51443,wt3_H2O2_31_S51454,wt4_38_S51444,wt4_H2O2_39_S51445
Ca22chr1A_C_albicans_SC5314	macs2	peak	1292935	1293018	ID=peak_682	wt2_32_S51442,wt2_H2O2_30_S51455,wt3_33_S51443,wt3_H2O2_31_S51454
Ca22chr1A_C_albicans_SC5314	macs2	peak	1294120	1294238	ID=peak_683	wt2_32_S51442,wt2_H2O2_30_S51455,wt3_H2O2_31_S51454
Ca22chr1A_C_albicans_SC5314	macs2	peak	1302978	1303416	ID=peak_684	wt2_32_S51442,wt2_H2O2_30_S51455,wt3_33_S51443,wt3_H2O2_31_S51454,wt4_38_S51444,wt4_H2O2_39_S51445
Ca22chr1A_C_albicans_SC5314	macs2	peak	1309085	1309177	ID=peak_685	wt2_H2O2_30_S51455
Ca22chr1A_C_albicans_SC5314	macs2	peak	1310483	1310573	ID=peak_686	wt2_32_S51442,wt3_33_S51443
Ca22chr1A_C_albicans_SC5314	macs2	peak	1318318	1318458	ID=peak_687	wt2_32_S51442,wt3_33_S51443,wt3_H2O2_31_S51454,wt4_38_S51444,wt4_H2O2_39_S51445
Ca22chr1A_C_albicans_SC5314	macs2	peak	1321509	1321913	ID=peak_688	wt2_32_S51442,wt2_H2O2_30_S51455,wt3_33_S51443,wt4_38_S51444,wt4_H2O2_39_S51445
Ca22chr1A_C_albicans_SC5314	macs2	peak	1322145	1322247	ID=peak_689	wt4_38_S51444
Ca22chr1A_C_albicans_SC5314	macs2	peak	1322386	1322787	ID=peak_690	wt2_32_S51442,wt3_33_S51443
Ca22chr1A_C_albicans_SC5314	macs2	peak	1323737	1323848	ID=peak_691	wt2_32_S51442
Ca22chr1A_C_albicans_SC5314	macs2	peak	1324693	1324798	ID=peak_692	wt3_33_S51443
Ca22chr1A_C_albicans_SC5314	macs2	peak	1325235	1325326	ID=peak_693	wt3_33_S51443
Ca22chr1A_C_albicans_SC5314	macs2	peak	1327785	1327868	ID=peak_694	wt2_32_S51442
Ca22chr1A_C_albicans_SC5314	macs2	peak	1329526	1329721	ID=peak_695	wt2_32_S51442,wt2_H2O2_30_S51455,wt3_33_S51443,wt3_H2O2_31_S51454,wt4_38_S51444,wt4_H2O2_39_S51445
Ca22chr1A_C_albicans_SC5314	macs2	peak	1329851	1329929	ID=peak_696	wt2_H2O2_30_S51455
Ca22chr1A_C_albicans_SC5314	macs2	peak	1330066	1330235	ID=peak_697	wt2_32_S51442,wt2_H2O2_30_S51455,wt3_33_S51443,wt3_H2O2_31_S51454
Ca22chr1A_C_albicans_SC5314	macs2	peak	1331204	1331356	ID=peak_698	wt3_33_S51443,wt4_38_S51444
Ca22chr1A_C_albicans_SC5314	macs2	peak	1331534	1332031	ID=peak_699	wt2_32_S51442,wt2_H2O2_30_S51455,wt3_33_S51443,wt3_H2O2_31_S51454,wt4_38_S51444,wt4_H2O2_39_S51445
Ca22chr1A_C_albicans_SC5314	macs2	peak	1332137	1332526	ID=peak_700	wt2_32_S51442,wt3_33_S51443,wt4_H2O2_39_S51445
Ca22chr1A_C_albicans_SC5314	macs2	peak	1332916	1332989	ID=peak_701	wt2_H2O2_30_S51455
Ca22chr1A_C_albicans_SC5314	macs2	peak	1333321	1333785	ID=peak_702	wt2_32_S51442,wt2_H2O2_30_S51455,wt3_33_S51443,wt3_H2O2_31_S51454,wt4_38_S51444,wt4_H2O2_39_S51445
Ca22chr1A_C_albicans_SC5314	macs2	peak	1333951	1334131	ID=peak_703	wt2_32_S51442,wt3_33_S51443,wt3_H2O2_31_S51454
Ca22chr1A_C_albicans_SC5314	macs2	peak	1335068	1335530	ID=peak_704	wt2_32_S51442,wt2_H2O2_30_S51455,wt3_33_S51443,wt3_H2O2_31_S51454,wt4_38_S51444,wt4_H2O2_39_S51445
Ca22chr1A_C_albicans_SC5314	macs2	peak	1336040	1336143	ID=peak_705	wt2_32_S51442,wt3_33_S51443
Ca22chr1A_C_albicans_SC5314	macs2	peak	1336295	1336436	ID=peak_706	wt2_32_S51442,wt2_H2O2_30_S51455,wt3_33_S51443,wt3_H2O2_31_S51454,wt4_38_S51444
Ca22chr1A_C_albicans_SC5314	macs2	peak	1336873	1337100	ID=peak_707	wt2_32_S51442,wt3_33_S51443
Ca22chr1A_C_albicans_SC5314	macs2	peak	1341754	1341854	ID=peak_708	wt2_32_S51442,wt3_33_S51443
Ca22chr1A_C_albicans_SC5314	macs2	peak	1342089	1342180	ID=peak_709	wt2_32_S51442,wt3_33_S51443
Ca22chr1A_C_albicans_SC5314	macs2	peak	1343253	1343324	ID=peak_710	wt2_32_S51442
Ca22chr1A_C_albicans_SC5314	macs2	peak	1349266	1349473	ID=peak_711	wt2_32_S51442,wt2_H2O2_30_S51455,wt3_33_S51443,wt3_H2O2_31_S51454,wt4_H2O2_39_S51445
Ca22chr1A_C_albicans_SC5314	macs2	peak	1349595	1349837	ID=peak_712	wt2_32_S51442,wt2_H2O2_30_S51455,wt3_33_S51443,wt3_H2O2_31_S51454,wt4_38_S51444
Ca22chr1A_C_albicans_SC5314	macs2	peak	1350058	1350211	ID=peak_713	wt2_32_S51442,wt3_33_S51443,wt4_H2O2_39_S51445
Ca22chr1A_C_albicans_SC5314	macs2	peak	1353744	1353885	ID=peak_714	wt2_32_S51442,wt2_H2O2_30_S51455,wt3_33_S51443,wt3_H2O2_31_S51454,wt4_38_S51444,wt4_H2O2_39_S51445
Ca22chr1A_C_albicans_SC5314	macs2	peak	1358256	1358327	ID=peak_715	wt2_32_S51442
Ca22chr1A_C_albicans_SC5314	macs2	peak	1359738	1359849	ID=peak_716	wt2_32_S51442,wt3_33_S51443,wt3_H2O2_31_S51454,wt4_H2O2_39_S51445
Ca22chr1A_C_albicans_SC5314	macs2	peak	1363285	1363377	ID=peak_717	wt2_32_S51442
Ca22chr1A_C_albicans_SC5314	macs2	peak	1363976	1364143	ID=peak_718	wt2_32_S51442,wt2_H2O2_30_S51455,wt3_33_S51443,wt3_H2O2_31_S51454
Ca22chr1A_C_albicans_SC5314	macs2	peak	1369783	1369950	ID=peak_719	wt2_32_S51442,wt2_H2O2_30_S51455,wt3_33_S51443,wt3_H2O2_31_S51454,wt4_38_S51444,wt4_H2O2_39_S51445
Ca22chr1A_C_albicans_SC5314	macs2	peak	1375547	1375670	ID=peak_720	wt2_32_S51442,wt2_H2O2_30_S51455,wt3_33_S51443,wt3_H2O2_31_S51454,wt4_H2O2_39_S51445
Ca22chr1A_C_albicans_SC5314	macs2	peak	1376717	1376960	ID=peak_721	wt2_32_S51442,wt2_H2O2_30_S51455,wt3_33_S51443,wt3_H2O2_31_S51454,wt4_38_S51444,wt4_H2O2_39_S51445
Ca22chr1A_C_albicans_SC5314	macs2	peak	1377463	1377736	ID=peak_722	wt2_32_S51442,wt2_H2O2_30_S51455,wt3_33_S51443,wt3_H2O2_31_S51454,wt4_38_S51444,wt4_H2O2_39_S51445
Ca22chr1A_C_albicans_SC5314	macs2	peak	1379884	1379984	ID=peak_723	wt2_H2O2_30_S51455
Ca22chr1A_C_albicans_SC5314	macs2	peak	1382667	1382763	ID=peak_724	wt2_32_S51442,wt3_33_S51443
Ca22chr1A_C_albicans_SC5314	macs2	peak	1389914	1390059	ID=peak_725	wt2_32_S51442,wt2_H2O2_30_S51455,wt3_33_S51443,wt3_H2O2_31_S51454,wt4_38_S51444,wt4_H2O2_39_S51445
Ca22chr1A_C_albicans_SC5314	macs2	peak	1394546	1394670	ID=peak_726	wt2_32_S51442,wt3_H2O2_31_S51454
Ca22chr1A_C_albicans_SC5314	macs2	peak	1394862	1394967	ID=peak_727	wt2_32_S51442,wt2_H2O2_30_S51455,wt3_H2O2_31_S51454,wt4_H2O2_39_S51445
Ca22chr1A_C_albicans_SC5314	macs2	peak	1396691	1396819	ID=peak_728	wt2_32_S51442,wt2_H2O2_30_S51455,wt3_33_S51443,wt3_H2O2_31_S51454,wt4_38_S51444,wt4_H2O2_39_S51445
Ca22chr1A_C_albicans_SC5314	macs2	peak	1397087	1397447	ID=peak_729	wt2_32_S51442,wt2_H2O2_30_S51455,wt3_33_S51443,wt3_H2O2_31_S51454,wt4_38_S51444,wt4_H2O2_39_S51445
Ca22chr1A_C_albicans_SC5314	macs2	peak	1404695	1404772	ID=peak_730	wt2_32_S51442,wt3_33_S51443
Ca22chr1A_C_albicans_SC5314	macs2	peak	1406131	1406572	ID=peak_731	wt2_32_S51442,wt2_H2O2_30_S51455,wt3_33_S51443,wt3_H2O2_31_S51454,wt4_38_S51444,wt4_H2O2_39_S51445
Ca22chr1A_C_albicans_SC5314	macs2	peak	1406826	1406910	ID=peak_732	wt2_32_S51442,wt4_38_S51444
Ca22chr1A_C_albicans_SC5314	macs2	peak	1407537	1407608	ID=peak_733	wt2_32_S51442
Ca22chr1A_C_albicans_SC5314	macs2	peak	1407806	1407882	ID=peak_734	wt4_38_S51444
Ca22chr1A_C_albicans_SC5314	macs2	peak	1408474	1408905	ID=peak_735	wt2_32_S51442,wt2_H2O2_30_S51455,wt3_33_S51443,wt3_H2O2_31_S51454,wt4_38_S51444,wt4_H2O2_39_S51445
Ca22chr1A_C_albicans_SC5314	macs2	peak	1411434	1411617	ID=peak_736	wt2_32_S51442,wt2_H2O2_30_S51455,wt3_33_S51443,wt3_H2O2_31_S51454,wt4_H2O2_39_S51445
Ca22chr1A_C_albicans_SC5314	macs2	peak	1415705	1415784	ID=peak_737	wt2_H2O2_30_S51455
Ca22chr1A_C_albicans_SC5314	macs2	peak	1416113	1416364	ID=peak_738	wt2_H2O2_30_S51455,wt3_H2O2_31_S51454,wt4_H2O2_39_S51445
Ca22chr1A_C_albicans_SC5314	macs2	peak	1416566	1416888	ID=peak_739	wt2_32_S51442,wt2_H2O2_30_S51455,wt3_H2O2_31_S51454,wt4_H2O2_39_S51445
Ca22chr1A_C_albicans_SC5314	macs2	peak	1421621	1421808	ID=peak_740	wt2_32_S51442,wt2_H2O2_30_S51455,wt3_33_S51443,wt3_H2O2_31_S51454,wt4_38_S51444,wt4_H2O2_39_S51445
Ca22chr1A_C_albicans_SC5314	macs2	peak	1422376	1422787	ID=peak_741	wt2_32_S51442,wt2_H2O2_30_S51455,wt3_33_S51443,wt3_H2O2_31_S51454,wt4_38_S51444,wt4_H2O2_39_S51445
Ca22chr1A_C_albicans_SC5314	macs2	peak	1424849	1425130	ID=peak_742	wt2_32_S51442,wt2_H2O2_30_S51455,wt3_33_S51443,wt3_H2O2_31_S51454,wt4_38_S51444,wt4_H2O2_39_S51445
Ca22chr1A_C_albicans_SC5314	macs2	peak	1427729	1427804	ID=peak_743	wt2_H2O2_30_S51455
Ca22chr1A_C_albicans_SC5314	macs2	peak	1430941	1431405	ID=peak_744	wt2_32_S51442,wt2_H2O2_30_S51455,wt3_33_S51443,wt3_H2O2_31_S51454,wt4_H2O2_39_S51445
Ca22chr1A_C_albicans_SC5314	macs2	peak	1438236	1438412	ID=peak_745	wt2_32_S51442,wt2_H2O2_30_S51455,wt3_H2O2_31_S51454
Ca22chr1A_C_albicans_SC5314	macs2	peak	1439436	1439630	ID=peak_746	wt2_32_S51442,wt2_H2O2_30_S51455,wt3_33_S51443
Ca22chr1A_C_albicans_SC5314	macs2	peak	1442140	1442241	ID=peak_747	wt2_32_S51442,wt2_H2O2_30_S51455,wt3_33_S51443
Ca22chr1A_C_albicans_SC5314	macs2	peak	1445992	1446073	ID=peak_748	wt2_32_S51442,wt2_H2O2_30_S51455,wt3_H2O2_31_S51454
Ca22chr1A_C_albicans_SC5314	macs2	peak	1446584	1446804	ID=peak_749	wt2_32_S51442,wt2_H2O2_30_S51455,wt3_33_S51443,wt3_H2O2_31_S51454,wt4_38_S51444,wt4_H2O2_39_S51445
Ca22chr1A_C_albicans_SC5314	macs2	peak	1450394	1450535	ID=peak_750	wt2_32_S51442,wt2_H2O2_30_S51455,wt3_H2O2_31_S51454
Ca22chr1A_C_albicans_SC5314	macs2	peak	1452025	1453211	ID=peak_751	wt2_32_S51442,wt2_H2O2_30_S51455,wt3_33_S51443,wt3_H2O2_31_S51454,wt4_H2O2_39_S51445
Ca22chr1A_C_albicans_SC5314	macs2	peak	1454260	1454935	ID=peak_752	wt2_32_S51442,wt2_H2O2_30_S51455,wt3_33_S51443,wt3_H2O2_31_S51454,wt4_38_S51444,wt4_H2O2_39_S51445
Ca22chr1A_C_albicans_SC5314	macs2	peak	1455005	1455272	ID=peak_753	wt2_32_S51442,wt2_H2O2_30_S51455,wt3_33_S51443,wt3_H2O2_31_S51454,wt4_H2O2_39_S51445
Ca22chr1A_C_albicans_SC5314	macs2	peak	1456674	1456755	ID=peak_754	wt2_32_S51442,wt2_H2O2_30_S51455,wt3_H2O2_31_S51454
Ca22chr1A_C_albicans_SC5314	macs2	peak	1457618	1457832	ID=peak_755	wt2_32_S51442,wt2_H2O2_30_S51455,wt3_H2O2_31_S51454,wt4_H2O2_39_S51445
Ca22chr1A_C_albicans_SC5314	macs2	peak	1457900	1458616	ID=peak_756	wt2_32_S51442,wt2_H2O2_30_S51455,wt3_33_S51443,wt3_H2O2_31_S51454,wt4_38_S51444,wt4_H2O2_39_S51445
Ca22chr1A_C_albicans_SC5314	macs2	peak	1459300	1459370	ID=peak_757	wt4_38_S51444
Ca22chr1A_C_albicans_SC5314	macs2	peak	1461856	1461957	ID=peak_758	wt4_H2O2_39_S51445
Ca22chr1A_C_albicans_SC5314	macs2	peak	1464816	1464884	ID=peak_759	wt2_H2O2_30_S51455
Ca22chr1A_C_albicans_SC5314	macs2	peak	1469288	1469607	ID=peak_760	wt2_32_S51442,wt2_H2O2_30_S51455,wt3_33_S51443,wt3_H2O2_31_S51454,wt4_38_S51444,wt4_H2O2_39_S51445
Ca22chr1A_C_albicans_SC5314	macs2	peak	1470274	1470458	ID=peak_761	wt2_32_S51442,wt2_H2O2_30_S51455,wt3_33_S51443,wt3_H2O2_31_S51454,wt4_H2O2_39_S51445
Ca22chr1A_C_albicans_SC5314	macs2	peak	1473296	1473380	ID=peak_762	wt2_32_S51442,wt2_H2O2_30_S51455,wt3_33_S51443,wt3_H2O2_31_S51454,wt4_H2O2_39_S51445
Ca22chr1A_C_albicans_SC5314	macs2	peak	1475098	1475431	ID=peak_763	wt2_32_S51442,wt2_H2O2_30_S51455,wt3_33_S51443,wt3_H2O2_31_S51454,wt4_38_S51444,wt4_H2O2_39_S51445
Ca22chr1A_C_albicans_SC5314	macs2	peak	1481304	1481417	ID=peak_764	wt4_38_S51444
Ca22chr1A_C_albicans_SC5314	macs2	peak	1483463	1484117	ID=peak_765	wt2_32_S51442,wt2_H2O2_30_S51455,wt3_33_S51443,wt3_H2O2_31_S51454,wt4_38_S51444,wt4_H2O2_39_S51445
Ca22chr1A_C_albicans_SC5314	macs2	peak	1487541	1487965	ID=peak_766	wt2_32_S51442,wt2_H2O2_30_S51455,wt3_33_S51443,wt3_H2O2_31_S51454,wt4_H2O2_39_S51445
Ca22chr1A_C_albicans_SC5314	macs2	peak	1488188	1488296	ID=peak_767	wt4_H2O2_39_S51445
Ca22chr1A_C_albicans_SC5314	macs2	peak	1489015	1489146	ID=peak_768	wt4_38_S51444
Ca22chr1A_C_albicans_SC5314	macs2	peak	1489326	1489781	ID=peak_769	wt2_32_S51442,wt2_H2O2_30_S51455,wt3_33_S51443,wt3_H2O2_31_S51454,wt4_38_S51444,wt4_H2O2_39_S51445
Ca22chr1A_C_albicans_SC5314	macs2	peak	1493641	1493732	ID=peak_770	wt4_38_S51444,wt4_H2O2_39_S51445
Ca22chr1A_C_albicans_SC5314	macs2	peak	1496472	1496609	ID=peak_771	wt4_H2O2_39_S51445
Ca22chr1A_C_albicans_SC5314	macs2	peak	1498831	1498908	ID=peak_772	wt4_H2O2_39_S51445
Ca22chr1A_C_albicans_SC5314	macs2	peak	1499287	1499687	ID=peak_773	wt2_32_S51442,wt2_H2O2_30_S51455,wt3_33_S51443,wt3_H2O2_31_S51454,wt4_38_S51444,wt4_H2O2_39_S51445
Ca22chr1A_C_albicans_SC5314	macs2	peak	1500496	1500995	ID=peak_774	wt2_32_S51442,wt2_H2O2_30_S51455,wt3_33_S51443,wt3_H2O2_31_S51454,wt4_38_S51444,wt4_H2O2_39_S51445
Ca22chr1A_C_albicans_SC5314	macs2	peak	1501390	1501465	ID=peak_775	wt4_38_S51444
Ca22chr1A_C_albicans_SC5314	macs2	peak	1502866	1503122	ID=peak_776	wt2_32_S51442,wt2_H2O2_30_S51455,wt3_33_S51443,wt3_H2O2_31_S51454,wt4_38_S51444
Ca22chr1A_C_albicans_SC5314	macs2	peak	1503877	1504323	ID=peak_777	wt2_32_S51442,wt2_H2O2_30_S51455,wt3_33_S51443,wt3_H2O2_31_S51454,wt4_38_S51444
Ca22chr1A_C_albicans_SC5314	macs2	peak	1508341	1508463	ID=peak_778	wt2_32_S51442,wt2_H2O2_30_S51455
Ca22chr1A_C_albicans_SC5314	macs2	peak	1512008	1512355	ID=peak_779	wt2_32_S51442,wt2_H2O2_30_S51455,wt3_33_S51443,wt3_H2O2_31_S51454,wt4_38_S51444,wt4_H2O2_39_S51445
Ca22chr1A_C_albicans_SC5314	macs2	peak	1512705	1513018	ID=peak_780	wt2_32_S51442,wt2_H2O2_30_S51455,wt3_33_S51443,wt3_H2O2_31_S51454,wt4_38_S51444,wt4_H2O2_39_S51445
Ca22chr1A_C_albicans_SC5314	macs2	peak	1516532	1516770	ID=peak_781	wt2_32_S51442,wt2_H2O2_30_S51455,wt3_33_S51443,wt3_H2O2_31_S51454,wt4_38_S51444,wt4_H2O2_39_S51445
Ca22chr1A_C_albicans_SC5314	macs2	peak	1517832	1517996	ID=peak_782	wt2_32_S51442,wt2_H2O2_30_S51455,wt3_33_S51443,wt3_H2O2_31_S51454,wt4_38_S51444,wt4_H2O2_39_S51445
Ca22chr1A_C_albicans_SC5314	macs2	peak	1521968	1522081	ID=peak_783	wt4_38_S51444,wt4_H2O2_39_S51445
Ca22chr1A_C_albicans_SC5314	macs2	peak	1522197	1522298	ID=peak_784	wt3_33_S51443
Ca22chr1A_C_albicans_SC5314	macs2	peak	1522367	1522534	ID=peak_785	wt2_32_S51442,wt2_H2O2_30_S51455,wt3_H2O2_31_S51454
Ca22chr1A_C_albicans_SC5314	macs2	peak	1522717	1522908	ID=peak_786	wt2_32_S51442,wt2_H2O2_30_S51455,wt3_33_S51443,wt3_H2O2_31_S51454,wt4_H2O2_39_S51445
Ca22chr1A_C_albicans_SC5314	macs2	peak	1523187	1523653	ID=peak_787	wt2_32_S51442,wt2_H2O2_30_S51455,wt3_33_S51443,wt3_H2O2_31_S51454,wt4_38_S51444,wt4_H2O2_39_S51445
Ca22chr1A_C_albicans_SC5314	macs2	peak	1524772	1524988	ID=peak_788	wt2_32_S51442,wt3_33_S51443,wt4_38_S51444
Ca22chr1A_C_albicans_SC5314	macs2	peak	1525207	1525423	ID=peak_789	wt2_32_S51442,wt2_H2O2_30_S51455,wt3_33_S51443,wt3_H2O2_31_S51454,wt4_38_S51444,wt4_H2O2_39_S51445
Ca22chr1A_C_albicans_SC5314	macs2	peak	1525514	1525738	ID=peak_790	wt2_32_S51442,wt2_H2O2_30_S51455,wt3_33_S51443,wt3_H2O2_31_S51454,wt4_38_S51444,wt4_H2O2_39_S51445
Ca22chr1A_C_albicans_SC5314	macs2	peak	1525813	1526216	ID=peak_791	wt2_32_S51442,wt2_H2O2_30_S51455,wt3_33_S51443,wt3_H2O2_31_S51454,wt4_38_S51444,wt4_H2O2_39_S51445
Ca22chr1A_C_albicans_SC5314	macs2	peak	1526378	1526481	ID=peak_792	wt2_32_S51442,wt2_H2O2_30_S51455
Ca22chr1A_C_albicans_SC5314	macs2	peak	1526580	1526655	ID=peak_793	wt3_33_S51443
Ca22chr1A_C_albicans_SC5314	macs2	peak	1529155	1529255	ID=peak_794	wt4_38_S51444
Ca22chr1A_C_albicans_SC5314	macs2	peak	1535560	1535886	ID=peak_795	wt2_32_S51442,wt2_H2O2_30_S51455,wt3_33_S51443,wt3_H2O2_31_S51454,wt4_H2O2_39_S51445
Ca22chr1A_C_albicans_SC5314	macs2	peak	1536080	1536213	ID=peak_796	wt2_H2O2_30_S51455,wt3_H2O2_31_S51454,wt4_H2O2_39_S51445
Ca22chr1A_C_albicans_SC5314	macs2	peak	1536388	1536487	ID=peak_797	wt2_32_S51442,wt2_H2O2_30_S51455,wt3_H2O2_31_S51454
Ca22chr1A_C_albicans_SC5314	macs2	peak	1538886	1538964	ID=peak_798	wt2_H2O2_30_S51455
Ca22chr1A_C_albicans_SC5314	macs2	peak	1539141	1539408	ID=peak_799	wt2_32_S51442,wt2_H2O2_30_S51455,wt3_33_S51443,wt3_H2O2_31_S51454,wt4_38_S51444,wt4_H2O2_39_S51445
Ca22chr1A_C_albicans_SC5314	macs2	peak	1540343	1540643	ID=peak_800	wt2_H2O2_30_S51455,wt3_H2O2_31_S51454,wt4_H2O2_39_S51445
Ca22chr1A_C_albicans_SC5314	macs2	peak	1541837	1542005	ID=peak_801	wt2_32_S51442,wt2_H2O2_30_S51455,wt3_33_S51443,wt3_H2O2_31_S51454,wt4_38_S51444,wt4_H2O2_39_S51445
Ca22chr1A_C_albicans_SC5314	macs2	peak	1544918	1545009	ID=peak_802	wt2_32_S51442,wt2_H2O2_30_S51455
Ca22chr1A_C_albicans_SC5314	macs2	peak	1545139	1545295	ID=peak_803	wt2_32_S51442,wt2_H2O2_30_S51455,wt3_33_S51443,wt3_H2O2_31_S51454,wt4_38_S51444,wt4_H2O2_39_S51445
Ca22chr1A_C_albicans_SC5314	macs2	peak	1548060	1548128	ID=peak_804	wt4_H2O2_39_S51445
Ca22chr1A_C_albicans_SC5314	macs2	peak	1548139	1548255	ID=peak_805	wt2_H2O2_30_S51455
Ca22chr1A_C_albicans_SC5314	macs2	peak	1548799	1548906	ID=peak_806	wt2_32_S51442,wt2_H2O2_30_S51455,wt3_33_S51443,wt3_H2O2_31_S51454
Ca22chr1A_C_albicans_SC5314	macs2	peak	1549125	1549646	ID=peak_807	wt2_32_S51442,wt2_H2O2_30_S51455,wt3_33_S51443,wt3_H2O2_31_S51454,wt4_38_S51444,wt4_H2O2_39_S51445
Ca22chr1A_C_albicans_SC5314	macs2	peak	1551452	1551658	ID=peak_808	wt2_32_S51442,wt2_H2O2_30_S51455,wt3_33_S51443,wt3_H2O2_31_S51454,wt4_38_S51444,wt4_H2O2_39_S51445
Ca22chr1A_C_albicans_SC5314	macs2	peak	1552672	1553288	ID=peak_809	wt2_32_S51442,wt2_H2O2_30_S51455,wt3_33_S51443,wt3_H2O2_31_S51454,wt4_H2O2_39_S51445
Ca22chr1A_C_albicans_SC5314	macs2	peak	1561973	1562039	ID=peak_810	wt4_H2O2_39_S51445
Ca22chr1A_C_albicans_SC5314	macs2	peak	1562899	1563171	ID=peak_811	wt2_32_S51442,wt2_H2O2_30_S51455,wt3_33_S51443,wt3_H2O2_31_S51454,wt4_38_S51444,wt4_H2O2_39_S51445
Ca22chr1A_C_albicans_SC5314	macs2	peak	1563433	1563616	ID=peak_812	wt2_32_S51442,wt2_H2O2_30_S51455
Ca22chr1A_C_albicans_SC5314	macs2	peak	1564089	1564235	ID=peak_813	wt2_H2O2_30_S51455,wt3_33_S51443
Ca22chr1A_C_albicans_SC5314	macs2	peak	1564750	1564819	ID=peak_814	wt4_38_S51444
Ca22chr1A_C_albicans_SC5314	macs2	peak	1565347	1565524	ID=peak_815	wt2_32_S51442,wt2_H2O2_30_S51455,wt3_33_S51443,wt3_H2O2_31_S51454
Ca22chr1A_C_albicans_SC5314	macs2	peak	1565680	1565778	ID=peak_816	wt2_32_S51442
Ca22chr1A_C_albicans_SC5314	macs2	peak	1565999	1566199	ID=peak_817	wt2_32_S51442,wt2_H2O2_30_S51455,wt3_33_S51443,wt3_H2O2_31_S51454,wt4_38_S51444,wt4_H2O2_39_S51445
Ca22chr1A_C_albicans_SC5314	macs2	peak	1569639	1570228	ID=peak_818	wt2_32_S51442,wt2_H2O2_30_S51455,wt3_33_S51443,wt3_H2O2_31_S51454,wt4_38_S51444,wt4_H2O2_39_S51445
Ca22chr1A_C_albicans_SC5314	macs2	peak	1570547	1570805	ID=peak_819	wt2_32_S51442,wt2_H2O2_30_S51455,wt3_33_S51443,wt3_H2O2_31_S51454,wt4_H2O2_39_S51445
Ca22chr1A_C_albicans_SC5314	macs2	peak	1570875	1570960	ID=peak_820	wt4_38_S51444
Ca22chr1A_C_albicans_SC5314	macs2	peak	1571111	1571374	ID=peak_821	wt2_32_S51442,wt2_H2O2_30_S51455,wt3_33_S51443,wt3_H2O2_31_S51454,wt4_38_S51444,wt4_H2O2_39_S51445
Ca22chr1A_C_albicans_SC5314	macs2	peak	1571822	1572226	ID=peak_822	wt2_32_S51442,wt2_H2O2_30_S51455,wt3_33_S51443,wt3_H2O2_31_S51454,wt4_38_S51444,wt4_H2O2_39_S51445
Ca22chr1A_C_albicans_SC5314	macs2	peak	1572680	1572951	ID=peak_823	wt2_32_S51442,wt2_H2O2_30_S51455,wt3_33_S51443,wt4_38_S51444
Ca22chr1A_C_albicans_SC5314	macs2	peak	1573383	1573523	ID=peak_824	wt2_32_S51442,wt2_H2O2_30_S51455,wt3_33_S51443,wt3_H2O2_31_S51454
Ca22chr1A_C_albicans_SC5314	macs2	peak	1574342	1575318	ID=peak_825	wt2_32_S51442,wt2_H2O2_30_S51455,wt3_33_S51443,wt3_H2O2_31_S51454,wt4_38_S51444,wt4_H2O2_39_S51445
Ca22chr1A_C_albicans_SC5314	macs2	peak	1575921	1576124	ID=peak_826	wt3_33_S51443,wt4_38_S51444
Ca22chr1A_C_albicans_SC5314	macs2	peak	1577704	1578094	ID=peak_827	wt2_32_S51442,wt2_H2O2_30_S51455,wt3_33_S51443,wt3_H2O2_31_S51454,wt4_38_S51444,wt4_H2O2_39_S51445
Ca22chr1A_C_albicans_SC5314	macs2	peak	1579156	1579230	ID=peak_828	wt4_H2O2_39_S51445
Ca22chr1A_C_albicans_SC5314	macs2	peak	1580933	1581009	ID=peak_829	wt2_32_S51442
Ca22chr1A_C_albicans_SC5314	macs2	peak	1585517	1585606	ID=peak_830	wt2_32_S51442,wt2_H2O2_30_S51455,wt3_H2O2_31_S51454
Ca22chr1A_C_albicans_SC5314	macs2	peak	1592897	1593051	ID=peak_831	wt2_32_S51442,wt2_H2O2_30_S51455,wt3_33_S51443,wt3_H2O2_31_S51454,wt4_H2O2_39_S51445
Ca22chr1A_C_albicans_SC5314	macs2	peak	1594029	1594224	ID=peak_832	wt2_32_S51442,wt2_H2O2_30_S51455,wt3_33_S51443,wt3_H2O2_31_S51454,wt4_H2O2_39_S51445
Ca22chr1A_C_albicans_SC5314	macs2	peak	1594598	1594669	ID=peak_833	wt3_H2O2_31_S51454
Ca22chr1A_C_albicans_SC5314	macs2	peak	1598867	1599148	ID=peak_834	wt2_32_S51442,wt2_H2O2_30_S51455,wt3_33_S51443,wt3_H2O2_31_S51454,wt4_38_S51444,wt4_H2O2_39_S51445
Ca22chr1A_C_albicans_SC5314	macs2	peak	1599516	1599702	ID=peak_835	wt2_32_S51442,wt2_H2O2_30_S51455,wt3_33_S51443,wt3_H2O2_31_S51454,wt4_38_S51444
Ca22chr1A_C_albicans_SC5314	macs2	peak	1600136	1600346	ID=peak_836	wt2_32_S51442,wt2_H2O2_30_S51455,wt3_33_S51443,wt3_H2O2_31_S51454,wt4_38_S51444,wt4_H2O2_39_S51445
Ca22chr1A_C_albicans_SC5314	macs2	peak	1604156	1604255	ID=peak_837	wt2_32_S51442,wt2_H2O2_30_S51455,wt3_33_S51443,wt3_H2O2_31_S51454
Ca22chr1A_C_albicans_SC5314	macs2	peak	1604982	1605167	ID=peak_838	wt2_32_S51442,wt2_H2O2_30_S51455,wt3_33_S51443,wt3_H2O2_31_S51454,wt4_38_S51444,wt4_H2O2_39_S51445
Ca22chr1A_C_albicans_SC5314	macs2	peak	1606942	1607157	ID=peak_839	wt2_32_S51442,wt2_H2O2_30_S51455,wt3_33_S51443,wt3_H2O2_31_S51454,wt4_H2O2_39_S51445
Ca22chr1A_C_albicans_SC5314	macs2	peak	1608496	1608701	ID=peak_840	wt2_32_S51442
Ca22chr1A_C_albicans_SC5314	macs2	peak	1610901	1611064	ID=peak_841	wt2_32_S51442,wt2_H2O2_30_S51455,wt3_33_S51443,wt4_38_S51444
Ca22chr1A_C_albicans_SC5314	macs2	peak	1614284	1614502	ID=peak_842	wt2_32_S51442,wt2_H2O2_30_S51455,wt3_33_S51443,wt3_H2O2_31_S51454,wt4_H2O2_39_S51445
Ca22chr1A_C_albicans_SC5314	macs2	peak	1616924	1617009	ID=peak_843	wt2_32_S51442,wt2_H2O2_30_S51455,wt3_33_S51443
Ca22chr1A_C_albicans_SC5314	macs2	peak	1624873	1625103	ID=peak_844	wt2_32_S51442,wt2_H2O2_30_S51455,wt3_33_S51443,wt3_H2O2_31_S51454,wt4_H2O2_39_S51445
Ca22chr1A_C_albicans_SC5314	macs2	peak	1630101	1630271	ID=peak_845	wt2_32_S51442,wt2_H2O2_30_S51455,wt3_33_S51443,wt3_H2O2_31_S51454,wt4_38_S51444,wt4_H2O2_39_S51445
Ca22chr1A_C_albicans_SC5314	macs2	peak	1630400	1630497	ID=peak_846	wt2_H2O2_30_S51455
Ca22chr1A_C_albicans_SC5314	macs2	peak	1631622	1631741	ID=peak_847	wt2_32_S51442,wt2_H2O2_30_S51455,wt3_H2O2_31_S51454,wt4_H2O2_39_S51445
Ca22chr1A_C_albicans_SC5314	macs2	peak	1634858	1635116	ID=peak_848	wt2_32_S51442,wt2_H2O2_30_S51455,wt3_33_S51443,wt3_H2O2_31_S51454,wt4_38_S51444,wt4_H2O2_39_S51445
Ca22chr1A_C_albicans_SC5314	macs2	peak	1636687	1636843	ID=peak_849	wt2_32_S51442,wt2_H2O2_30_S51455,wt3_33_S51443,wt3_H2O2_31_S51454,wt4_38_S51444,wt4_H2O2_39_S51445
Ca22chr1A_C_albicans_SC5314	macs2	peak	1645218	1645548	ID=peak_850	wt2_32_S51442,wt2_H2O2_30_S51455,wt3_33_S51443,wt3_H2O2_31_S51454,wt4_38_S51444,wt4_H2O2_39_S51445
Ca22chr1A_C_albicans_SC5314	macs2	peak	1649425	1649508	ID=peak_851	wt2_32_S51442
Ca22chr1A_C_albicans_SC5314	macs2	peak	1654027	1654264	ID=peak_852	wt2_32_S51442,wt2_H2O2_30_S51455,wt3_33_S51443,wt3_H2O2_31_S51454,wt4_38_S51444,wt4_H2O2_39_S51445
Ca22chr1A_C_albicans_SC5314	macs2	peak	1654435	1654937	ID=peak_853	wt2_32_S51442,wt2_H2O2_30_S51455,wt3_33_S51443,wt3_H2O2_31_S51454,wt4_38_S51444,wt4_H2O2_39_S51445
Ca22chr1A_C_albicans_SC5314	macs2	peak	1656335	1656457	ID=peak_854	wt2_32_S51442,wt2_H2O2_30_S51455,wt3_33_S51443
Ca22chr1A_C_albicans_SC5314	macs2	peak	1659502	1659629	ID=peak_855	wt2_32_S51442,wt3_33_S51443,wt4_38_S51444
Ca22chr1A_C_albicans_SC5314	macs2	peak	1659805	1660126	ID=peak_856	wt2_32_S51442,wt2_H2O2_30_S51455,wt3_33_S51443,wt3_H2O2_31_S51454,wt4_38_S51444,wt4_H2O2_39_S51445
Ca22chr1A_C_albicans_SC5314	macs2	peak	1673219	1673366	ID=peak_857	wt2_32_S51442,wt2_H2O2_30_S51455,wt3_33_S51443,wt3_H2O2_31_S51454,wt4_38_S51444,wt4_H2O2_39_S51445
Ca22chr1A_C_albicans_SC5314	macs2	peak	1674359	1674427	ID=peak_858	wt4_38_S51444
Ca22chr1A_C_albicans_SC5314	macs2	peak	1675404	1675918	ID=peak_859	wt2_32_S51442,wt2_H2O2_30_S51455,wt3_33_S51443,wt3_H2O2_31_S51454,wt4_38_S51444,wt4_H2O2_39_S51445
Ca22chr1A_C_albicans_SC5314	macs2	peak	1676317	1676564	ID=peak_860	wt2_32_S51442,wt2_H2O2_30_S51455,wt3_33_S51443,wt3_H2O2_31_S51454,wt4_38_S51444,wt4_H2O2_39_S51445
Ca22chr1A_C_albicans_SC5314	macs2	peak	1679404	1679481	ID=peak_861	wt2_32_S51442
Ca22chr1A_C_albicans_SC5314	macs2	peak	1686649	1686733	ID=peak_862	wt2_32_S51442,wt2_H2O2_30_S51455,wt3_H2O2_31_S51454
Ca22chr1A_C_albicans_SC5314	macs2	peak	1686910	1687108	ID=peak_863	wt2_32_S51442,wt2_H2O2_30_S51455,wt3_33_S51443,wt3_H2O2_31_S51454,wt4_38_S51444,wt4_H2O2_39_S51445
Ca22chr1A_C_albicans_SC5314	macs2	peak	1687636	1687710	ID=peak_864	wt3_33_S51443,wt4_38_S51444,wt4_H2O2_39_S51445
Ca22chr1A_C_albicans_SC5314	macs2	peak	1695322	1695425	ID=peak_865	wt2_32_S51442,wt2_H2O2_30_S51455,wt3_33_S51443,wt3_H2O2_31_S51454,wt4_38_S51444,wt4_H2O2_39_S51445
Ca22chr1A_C_albicans_SC5314	macs2	peak	1695529	1695654	ID=peak_866	wt4_38_S51444
Ca22chr1A_C_albicans_SC5314	macs2	peak	1696106	1696305	ID=peak_867	wt2_32_S51442,wt2_H2O2_30_S51455,wt3_33_S51443,wt3_H2O2_31_S51454,wt4_38_S51444,wt4_H2O2_39_S51445
Ca22chr1A_C_albicans_SC5314	macs2	peak	1704935	1705041	ID=peak_868	wt2_32_S51442,wt2_H2O2_30_S51455,wt3_33_S51443,wt4_38_S51444
Ca22chr1A_C_albicans_SC5314	macs2	peak	1707269	1707340	ID=peak_869	wt2_32_S51442
Ca22chr1A_C_albicans_SC5314	macs2	peak	1713690	1713907	ID=peak_870	wt2_32_S51442,wt2_H2O2_30_S51455,wt3_33_S51443,wt3_H2O2_31_S51454,wt4_38_S51444,wt4_H2O2_39_S51445
Ca22chr1A_C_albicans_SC5314	macs2	peak	1713992	1714462	ID=peak_871	wt2_32_S51442,wt2_H2O2_30_S51455,wt3_33_S51443,wt3_H2O2_31_S51454,wt4_38_S51444,wt4_H2O2_39_S51445
Ca22chr1A_C_albicans_SC5314	macs2	peak	1717026	1717179	ID=peak_872	wt2_H2O2_30_S51455
Ca22chr1A_C_albicans_SC5314	macs2	peak	1717406	1717742	ID=peak_873	wt2_32_S51442,wt2_H2O2_30_S51455,wt3_33_S51443,wt3_H2O2_31_S51454,wt4_38_S51444,wt4_H2O2_39_S51445
Ca22chr1A_C_albicans_SC5314	macs2	peak	1717791	1717992	ID=peak_874	wt4_38_S51444,wt4_H2O2_39_S51445
Ca22chr1A_C_albicans_SC5314	macs2	peak	1718169	1718323	ID=peak_875	wt2_32_S51442,wt2_H2O2_30_S51455,wt3_33_S51443,wt3_H2O2_31_S51454
Ca22chr1A_C_albicans_SC5314	macs2	peak	1721028	1721123	ID=peak_876	wt2_32_S51442,wt2_H2O2_30_S51455,wt3_33_S51443
Ca22chr1A_C_albicans_SC5314	macs2	peak	1721756	1721950	ID=peak_877	wt2_32_S51442,wt2_H2O2_30_S51455,wt3_33_S51443
Ca22chr1A_C_albicans_SC5314	macs2	peak	1722393	1722658	ID=peak_878	wt2_32_S51442,wt2_H2O2_30_S51455,wt3_33_S51443,wt3_H2O2_31_S51454
Ca22chr1A_C_albicans_SC5314	macs2	peak	1725509	1725595	ID=peak_879	wt2_32_S51442,wt2_H2O2_30_S51455,wt3_H2O2_31_S51454
Ca22chr1A_C_albicans_SC5314	macs2	peak	1728035	1728134	ID=peak_880	wt2_32_S51442,wt2_H2O2_30_S51455,wt3_H2O2_31_S51454
Ca22chr1A_C_albicans_SC5314	macs2	peak	1729356	1729480	ID=peak_881	wt2_32_S51442,wt2_H2O2_30_S51455
Ca22chr1A_C_albicans_SC5314	macs2	peak	1730519	1730621	ID=peak_882	wt2_32_S51442,wt2_H2O2_30_S51455
Ca22chr1A_C_albicans_SC5314	macs2	peak	1735476	1735742	ID=peak_883	wt2_32_S51442,wt2_H2O2_30_S51455,wt3_33_S51443,wt3_H2O2_31_S51454
Ca22chr1A_C_albicans_SC5314	macs2	peak	1735896	1736018	ID=peak_884	wt2_32_S51442,wt2_H2O2_30_S51455,wt3_33_S51443,wt3_H2O2_31_S51454
Ca22chr1A_C_albicans_SC5314	macs2	peak	1737634	1737856	ID=peak_885	wt2_H2O2_30_S51455,wt3_H2O2_31_S51454
Ca22chr1A_C_albicans_SC5314	macs2	peak	1737917	1738189	ID=peak_886	wt2_32_S51442,wt2_H2O2_30_S51455,wt3_H2O2_31_S51454,wt4_H2O2_39_S51445
Ca22chr1A_C_albicans_SC5314	macs2	peak	1738492	1738815	ID=peak_887	wt2_H2O2_30_S51455,wt3_33_S51443,wt3_H2O2_31_S51454,wt4_H2O2_39_S51445
Ca22chr1A_C_albicans_SC5314	macs2	peak	1739014	1739293	ID=peak_888	wt2_H2O2_30_S51455
Ca22chr1A_C_albicans_SC5314	macs2	peak	1740239	1740560	ID=peak_889	wt2_32_S51442,wt2_H2O2_30_S51455,wt3_33_S51443,wt3_H2O2_31_S51454,wt4_H2O2_39_S51445
Ca22chr1A_C_albicans_SC5314	macs2	peak	1741168	1741670	ID=peak_890	wt2_H2O2_30_S51455,wt3_H2O2_31_S51454,wt4_H2O2_39_S51445
Ca22chr1A_C_albicans_SC5314	macs2	peak	1741788	1741890	ID=peak_891	wt2_H2O2_30_S51455
Ca22chr1A_C_albicans_SC5314	macs2	peak	1743355	1743546	ID=peak_892	wt2_H2O2_30_S51455,wt3_H2O2_31_S51454
Ca22chr1A_C_albicans_SC5314	macs2	peak	1743708	1744104	ID=peak_893	wt2_H2O2_30_S51455,wt3_H2O2_31_S51454,wt4_H2O2_39_S51445
Ca22chr1A_C_albicans_SC5314	macs2	peak	1744210	1745417	ID=peak_894	wt2_32_S51442,wt2_H2O2_30_S51455,wt3_33_S51443,wt3_H2O2_31_S51454,wt4_38_S51444,wt4_H2O2_39_S51445
Ca22chr1A_C_albicans_SC5314	macs2	peak	1746544	1746730	ID=peak_895	wt2_32_S51442,wt2_H2O2_30_S51455,wt3_33_S51443,wt3_H2O2_31_S51454,wt4_38_S51444,wt4_H2O2_39_S51445
Ca22chr1A_C_albicans_SC5314	macs2	peak	1749984	1750155	ID=peak_896	wt2_32_S51442,wt2_H2O2_30_S51455,wt3_33_S51443,wt3_H2O2_31_S51454,wt4_H2O2_39_S51445
Ca22chr1A_C_albicans_SC5314	macs2	peak	1751016	1751111	ID=peak_897	wt2_H2O2_30_S51455,wt3_H2O2_31_S51454,wt4_H2O2_39_S51445
Ca22chr1A_C_albicans_SC5314	macs2	peak	1753082	1753426	ID=peak_898	wt2_32_S51442,wt2_H2O2_30_S51455,wt3_33_S51443,wt3_H2O2_31_S51454,wt4_38_S51444,wt4_H2O2_39_S51445
Ca22chr1A_C_albicans_SC5314	macs2	peak	1754302	1754470	ID=peak_899	wt2_H2O2_30_S51455,wt3_H2O2_31_S51454
Ca22chr1A_C_albicans_SC5314	macs2	peak	1755200	1755344	ID=peak_900	wt2_32_S51442,wt2_H2O2_30_S51455,wt3_H2O2_31_S51454
Ca22chr1A_C_albicans_SC5314	macs2	peak	1756284	1756391	ID=peak_901	wt2_H2O2_30_S51455,wt3_33_S51443,wt3_H2O2_31_S51454
Ca22chr1A_C_albicans_SC5314	macs2	peak	1757017	1757851	ID=peak_902	wt2_32_S51442,wt2_H2O2_30_S51455,wt3_33_S51443,wt3_H2O2_31_S51454,wt4_38_S51444,wt4_H2O2_39_S51445
Ca22chr1A_C_albicans_SC5314	macs2	peak	1759446	1759559	ID=peak_903	wt3_H2O2_31_S51454
Ca22chr1A_C_albicans_SC5314	macs2	peak	1766885	1766963	ID=peak_904	wt3_33_S51443
Ca22chr1A_C_albicans_SC5314	macs2	peak	1767133	1767202	ID=peak_905	wt3_33_S51443
Ca22chr1A_C_albicans_SC5314	macs2	peak	1767512	1767597	ID=peak_906	wt4_38_S51444
Ca22chr1A_C_albicans_SC5314	macs2	peak	1772609	1772676	ID=peak_907	wt4_38_S51444
Ca22chr1A_C_albicans_SC5314	macs2	peak	1779065	1779234	ID=peak_908	wt2_32_S51442,wt2_H2O2_30_S51455,wt3_33_S51443,wt3_H2O2_31_S51454
Ca22chr1A_C_albicans_SC5314	macs2	peak	1783047	1783457	ID=peak_909	wt2_32_S51442,wt2_H2O2_30_S51455,wt3_33_S51443,wt3_H2O2_31_S51454,wt4_38_S51444,wt4_H2O2_39_S51445
Ca22chr1A_C_albicans_SC5314	macs2	peak	1784859	1785097	ID=peak_910	wt2_32_S51442,wt2_H2O2_30_S51455,wt3_33_S51443,wt3_H2O2_31_S51454,wt4_38_S51444,wt4_H2O2_39_S51445
Ca22chr1A_C_albicans_SC5314	macs2	peak	1789457	1789582	ID=peak_911	wt2_32_S51442,wt2_H2O2_30_S51455,wt3_33_S51443,wt3_H2O2_31_S51454
Ca22chr1A_C_albicans_SC5314	macs2	peak	1793937	1794070	ID=peak_912	wt2_32_S51442,wt3_H2O2_31_S51454
Ca22chr1A_C_albicans_SC5314	macs2	peak	1801232	1801329	ID=peak_913	wt2_H2O2_30_S51455,wt3_H2O2_31_S51454
Ca22chr1A_C_albicans_SC5314	macs2	peak	1806479	1806572	ID=peak_914	wt2_32_S51442,wt2_H2O2_30_S51455,wt3_H2O2_31_S51454,wt4_H2O2_39_S51445
Ca22chr1A_C_albicans_SC5314	macs2	peak	1806790	1806899	ID=peak_915	wt2_32_S51442,wt2_H2O2_30_S51455,wt3_H2O2_31_S51454,wt4_H2O2_39_S51445
Ca22chr1A_C_albicans_SC5314	macs2	peak	1808125	1808198	ID=peak_916	wt3_H2O2_31_S51454
Ca22chr1A_C_albicans_SC5314	macs2	peak	1814721	1814969	ID=peak_917	wt2_32_S51442,wt2_H2O2_30_S51455,wt3_33_S51443,wt3_H2O2_31_S51454,wt4_38_S51444,wt4_H2O2_39_S51445
Ca22chr1A_C_albicans_SC5314	macs2	peak	1815429	1815501	ID=peak_918	wt2_32_S51442
Ca22chr1A_C_albicans_SC5314	macs2	peak	1819351	1819451	ID=peak_919	wt2_32_S51442,wt2_H2O2_30_S51455,wt3_33_S51443
Ca22chr1A_C_albicans_SC5314	macs2	peak	1822532	1822648	ID=peak_920	wt2_32_S51442,wt2_H2O2_30_S51455
Ca22chr1A_C_albicans_SC5314	macs2	peak	1822742	1822966	ID=peak_921	wt2_32_S51442,wt2_H2O2_30_S51455,wt3_33_S51443,wt3_H2O2_31_S51454,wt4_H2O2_39_S51445
Ca22chr1A_C_albicans_SC5314	macs2	peak	1823115	1823193	ID=peak_922	wt2_32_S51442,wt3_33_S51443,wt3_H2O2_31_S51454
Ca22chr1A_C_albicans_SC5314	macs2	peak	1825595	1825681	ID=peak_923	wt2_H2O2_30_S51455,wt3_H2O2_31_S51454
Ca22chr1A_C_albicans_SC5314	macs2	peak	1825789	1825903	ID=peak_924	wt2_H2O2_30_S51455,wt3_H2O2_31_S51454
Ca22chr1A_C_albicans_SC5314	macs2	peak	1826092	1826408	ID=peak_925	wt2_32_S51442,wt2_H2O2_30_S51455,wt3_33_S51443,wt3_H2O2_31_S51454,wt4_38_S51444,wt4_H2O2_39_S51445
Ca22chr1A_C_albicans_SC5314	macs2	peak	1827929	1828075	ID=peak_926	wt3_H2O2_31_S51454,wt4_H2O2_39_S51445
Ca22chr1A_C_albicans_SC5314	macs2	peak	1828141	1828220	ID=peak_927	wt2_H2O2_30_S51455
Ca22chr1A_C_albicans_SC5314	macs2	peak	1828392	1828879	ID=peak_928	wt2_32_S51442,wt2_H2O2_30_S51455,wt3_H2O2_31_S51454,wt4_H2O2_39_S51445
Ca22chr1A_C_albicans_SC5314	macs2	peak	1830486	1830681	ID=peak_929	wt2_32_S51442,wt2_H2O2_30_S51455,wt3_33_S51443,wt3_H2O2_31_S51454,wt4_38_S51444,wt4_H2O2_39_S51445
Ca22chr1A_C_albicans_SC5314	macs2	peak	1830817	1830904	ID=peak_930	wt2_32_S51442
Ca22chr1A_C_albicans_SC5314	macs2	peak	1831132	1831344	ID=peak_931	wt2_32_S51442,wt2_H2O2_30_S51455,wt3_33_S51443,wt3_H2O2_31_S51454,wt4_38_S51444,wt4_H2O2_39_S51445
Ca22chr1A_C_albicans_SC5314	macs2	peak	1832422	1832599	ID=peak_932	wt2_32_S51442,wt2_H2O2_30_S51455,wt3_33_S51443,wt3_H2O2_31_S51454,wt4_38_S51444,wt4_H2O2_39_S51445
Ca22chr1A_C_albicans_SC5314	macs2	peak	1832864	1832997	ID=peak_933	wt2_H2O2_30_S51455,wt3_H2O2_31_S51454,wt4_H2O2_39_S51445
Ca22chr1A_C_albicans_SC5314	macs2	peak	1833138	1834049	ID=peak_934	wt2_32_S51442,wt2_H2O2_30_S51455,wt3_33_S51443,wt3_H2O2_31_S51454,wt4_H2O2_39_S51445
Ca22chr1A_C_albicans_SC5314	macs2	peak	1835897	1836617	ID=peak_935	wt2_32_S51442,wt2_H2O2_30_S51455,wt3_33_S51443,wt3_H2O2_31_S51454,wt4_38_S51444,wt4_H2O2_39_S51445
Ca22chr1A_C_albicans_SC5314	macs2	peak	1837690	1838466	ID=peak_936	wt2_32_S51442,wt2_H2O2_30_S51455,wt3_33_S51443,wt3_H2O2_31_S51454,wt4_38_S51444,wt4_H2O2_39_S51445
Ca22chr1A_C_albicans_SC5314	macs2	peak	1838549	1838748	ID=peak_937	wt2_32_S51442,wt2_H2O2_30_S51455,wt3_33_S51443,wt3_H2O2_31_S51454,wt4_H2O2_39_S51445
Ca22chr1A_C_albicans_SC5314	macs2	peak	1839092	1839171	ID=peak_938	wt3_33_S51443
Ca22chr1A_C_albicans_SC5314	macs2	peak	1839264	1839378	ID=peak_939	wt4_H2O2_39_S51445
Ca22chr1A_C_albicans_SC5314	macs2	peak	1841244	1841983	ID=peak_940	wt2_32_S51442,wt2_H2O2_30_S51455,wt3_33_S51443,wt3_H2O2_31_S51454,wt4_38_S51444,wt4_H2O2_39_S51445
Ca22chr1A_C_albicans_SC5314	macs2	peak	1842190	1842344	ID=peak_941	wt2_H2O2_30_S51455,wt3_H2O2_31_S51454
Ca22chr1A_C_albicans_SC5314	macs2	peak	1844871	1844949	ID=peak_942	wt4_38_S51444
Ca22chr1A_C_albicans_SC5314	macs2	peak	1845897	1846206	ID=peak_943	wt2_32_S51442,wt2_H2O2_30_S51455,wt3_33_S51443,wt3_H2O2_31_S51454,wt4_H2O2_39_S51445
Ca22chr1A_C_albicans_SC5314	macs2	peak	1849525	1850110	ID=peak_944	wt2_32_S51442,wt2_H2O2_30_S51455,wt3_33_S51443,wt3_H2O2_31_S51454,wt4_38_S51444,wt4_H2O2_39_S51445
Ca22chr1A_C_albicans_SC5314	macs2	peak	1851391	1851712	ID=peak_945	wt2_32_S51442,wt2_H2O2_30_S51455,wt3_33_S51443,wt3_H2O2_31_S51454,wt4_38_S51444,wt4_H2O2_39_S51445
Ca22chr1A_C_albicans_SC5314	macs2	peak	1854549	1854738	ID=peak_946	wt2_32_S51442,wt2_H2O2_30_S51455,wt3_33_S51443,wt3_H2O2_31_S51454,wt4_38_S51444,wt4_H2O2_39_S51445
Ca22chr1A_C_albicans_SC5314	macs2	peak	1856395	1856489	ID=peak_947	wt2_32_S51442,wt2_H2O2_30_S51455
Ca22chr1A_C_albicans_SC5314	macs2	peak	1857725	1857847	ID=peak_948	wt2_32_S51442,wt3_33_S51443,wt3_H2O2_31_S51454,wt4_H2O2_39_S51445
Ca22chr1A_C_albicans_SC5314	macs2	peak	1860563	1861164	ID=peak_949	wt2_32_S51442,wt2_H2O2_30_S51455,wt3_33_S51443,wt3_H2O2_31_S51454,wt4_38_S51444,wt4_H2O2_39_S51445
Ca22chr1A_C_albicans_SC5314	macs2	peak	1862355	1862484	ID=peak_950	wt2_32_S51442,wt2_H2O2_30_S51455,wt3_H2O2_31_S51454
Ca22chr1A_C_albicans_SC5314	macs2	peak	1863714	1864022	ID=peak_951	wt2_H2O2_30_S51455,wt3_H2O2_31_S51454
Ca22chr1A_C_albicans_SC5314	macs2	peak	1864158	1865476	ID=peak_952	wt2_H2O2_30_S51455,wt3_33_S51443,wt3_H2O2_31_S51454,wt4_H2O2_39_S51445
Ca22chr1A_C_albicans_SC5314	macs2	peak	1865561	1866375	ID=peak_953	wt2_32_S51442,wt2_H2O2_30_S51455,wt3_33_S51443,wt3_H2O2_31_S51454,wt4_38_S51444,wt4_H2O2_39_S51445
Ca22chr1A_C_albicans_SC5314	macs2	peak	1867588	1867765	ID=peak_954	wt2_32_S51442,wt2_H2O2_30_S51455,wt3_33_S51443,wt3_H2O2_31_S51454,wt4_H2O2_39_S51445
Ca22chr1A_C_albicans_SC5314	macs2	peak	1870774	1870999	ID=peak_955	wt2_32_S51442,wt2_H2O2_30_S51455,wt3_33_S51443,wt3_H2O2_31_S51454,wt4_38_S51444,wt4_H2O2_39_S51445
Ca22chr1A_C_albicans_SC5314	macs2	peak	1872193	1872436	ID=peak_956	wt2_32_S51442,wt2_H2O2_30_S51455,wt3_33_S51443,wt3_H2O2_31_S51454,wt4_38_S51444,wt4_H2O2_39_S51445
Ca22chr1A_C_albicans_SC5314	macs2	peak	1875859	1876033	ID=peak_957	wt2_32_S51442,wt3_33_S51443
Ca22chr1A_C_albicans_SC5314	macs2	peak	1876493	1876721	ID=peak_958	wt2_32_S51442,wt2_H2O2_30_S51455,wt3_33_S51443,wt3_H2O2_31_S51454,wt4_38_S51444,wt4_H2O2_39_S51445
Ca22chr1A_C_albicans_SC5314	macs2	peak	1879389	1879532	ID=peak_959	wt2_32_S51442,wt2_H2O2_30_S51455,wt3_33_S51443,wt3_H2O2_31_S51454
Ca22chr1A_C_albicans_SC5314	macs2	peak	1879680	1879911	ID=peak_960	wt2_32_S51442,wt2_H2O2_30_S51455,wt3_33_S51443,wt3_H2O2_31_S51454,wt4_38_S51444,wt4_H2O2_39_S51445
Ca22chr1A_C_albicans_SC5314	macs2	peak	1880304	1880385	ID=peak_961	wt2_32_S51442
Ca22chr1A_C_albicans_SC5314	macs2	peak	1885031	1885105	ID=peak_962	wt2_H2O2_30_S51455,wt3_H2O2_31_S51454,wt4_H2O2_39_S51445
Ca22chr1A_C_albicans_SC5314	macs2	peak	1886271	1886740	ID=peak_963	wt2_32_S51442,wt2_H2O2_30_S51455,wt3_33_S51443,wt3_H2O2_31_S51454,wt4_H2O2_39_S51445
Ca22chr1A_C_albicans_SC5314	macs2	peak	1889159	1889240	ID=peak_964	wt2_32_S51442,wt2_H2O2_30_S51455
Ca22chr1A_C_albicans_SC5314	macs2	peak	1891452	1891640	ID=peak_965	wt2_32_S51442,wt2_H2O2_30_S51455,wt3_33_S51443,wt3_H2O2_31_S51454,wt4_38_S51444,wt4_H2O2_39_S51445
Ca22chr1A_C_albicans_SC5314	macs2	peak	1892462	1892657	ID=peak_966	wt2_32_S51442,wt2_H2O2_30_S51455,wt3_33_S51443,wt3_H2O2_31_S51454,wt4_38_S51444,wt4_H2O2_39_S51445
Ca22chr1A_C_albicans_SC5314	macs2	peak	1895975	1896125	ID=peak_967	wt2_32_S51442,wt2_H2O2_30_S51455,wt3_33_S51443,wt3_H2O2_31_S51454,wt4_38_S51444,wt4_H2O2_39_S51445
Ca22chr1A_C_albicans_SC5314	macs2	peak	1902286	1902392	ID=peak_968	wt2_32_S51442,wt2_H2O2_30_S51455,wt3_33_S51443,wt3_H2O2_31_S51454,wt4_38_S51444,wt4_H2O2_39_S51445
Ca22chr1A_C_albicans_SC5314	macs2	peak	1907221	1907343	ID=peak_969	wt2_H2O2_30_S51455,wt3_H2O2_31_S51454
Ca22chr1A_C_albicans_SC5314	macs2	peak	1909897	1909981	ID=peak_970	wt3_H2O2_31_S51454
Ca22chr1A_C_albicans_SC5314	macs2	peak	1911745	1911925	ID=peak_971	wt2_32_S51442,wt2_H2O2_30_S51455,wt3_33_S51443,wt3_H2O2_31_S51454,wt4_38_S51444,wt4_H2O2_39_S51445
Ca22chr1A_C_albicans_SC5314	macs2	peak	1913588	1914761	ID=peak_972	wt2_32_S51442,wt2_H2O2_30_S51455,wt3_33_S51443,wt3_H2O2_31_S51454,wt4_38_S51444,wt4_H2O2_39_S51445
Ca22chr1A_C_albicans_SC5314	macs2	peak	1916157	1916590	ID=peak_973	wt2_H2O2_30_S51455,wt3_H2O2_31_S51454
Ca22chr1A_C_albicans_SC5314	macs2	peak	1921711	1921825	ID=peak_974	wt4_H2O2_39_S51445
Ca22chr1A_C_albicans_SC5314	macs2	peak	1928754	1928922	ID=peak_975	wt2_H2O2_30_S51455,wt3_H2O2_31_S51454
Ca22chr1A_C_albicans_SC5314	macs2	peak	1931095	1931167	ID=peak_976	wt2_H2O2_30_S51455
Ca22chr1A_C_albicans_SC5314	macs2	peak	1933411	1933602	ID=peak_977	wt2_32_S51442,wt2_H2O2_30_S51455,wt3_33_S51443,wt3_H2O2_31_S51454,wt4_38_S51444,wt4_H2O2_39_S51445
Ca22chr1A_C_albicans_SC5314	macs2	peak	1938276	1938441	ID=peak_978	wt2_32_S51442,wt2_H2O2_30_S51455,wt3_33_S51443,wt3_H2O2_31_S51454,wt4_H2O2_39_S51445
Ca22chr1A_C_albicans_SC5314	macs2	peak	1942933	1943024	ID=peak_979	wt2_H2O2_30_S51455,wt3_H2O2_31_S51454
Ca22chr1A_C_albicans_SC5314	macs2	peak	1943237	1943741	ID=peak_980	wt2_32_S51442,wt2_H2O2_30_S51455,wt3_33_S51443,wt3_H2O2_31_S51454
Ca22chr1A_C_albicans_SC5314	macs2	peak	1943964	1944704	ID=peak_981	wt2_32_S51442,wt2_H2O2_30_S51455,wt3_33_S51443,wt3_H2O2_31_S51454,wt4_38_S51444,wt4_H2O2_39_S51445
Ca22chr1A_C_albicans_SC5314	macs2	peak	1944823	1945042	ID=peak_982	wt2_32_S51442,wt2_H2O2_30_S51455,wt3_33_S51443,wt3_H2O2_31_S51454,wt4_38_S51444,wt4_H2O2_39_S51445
Ca22chr1A_C_albicans_SC5314	macs2	peak	1945116	1945934	ID=peak_983	wt2_32_S51442,wt2_H2O2_30_S51455,wt3_33_S51443,wt3_H2O2_31_S51454,wt4_H2O2_39_S51445
Ca22chr1A_C_albicans_SC5314	macs2	peak	1946878	1947359	ID=peak_984	wt2_32_S51442,wt2_H2O2_30_S51455,wt3_33_S51443,wt3_H2O2_31_S51454,wt4_38_S51444,wt4_H2O2_39_S51445
Ca22chr1A_C_albicans_SC5314	macs2	peak	1947481	1947582	ID=peak_985	wt2_H2O2_30_S51455,wt3_H2O2_31_S51454
Ca22chr1A_C_albicans_SC5314	macs2	peak	1947795	1947933	ID=peak_986	wt2_32_S51442,wt2_H2O2_30_S51455,wt3_33_S51443,wt3_H2O2_31_S51454
Ca22chr1A_C_albicans_SC5314	macs2	peak	1951792	1952084	ID=peak_987	wt2_32_S51442,wt2_H2O2_30_S51455,wt3_33_S51443,wt3_H2O2_31_S51454
Ca22chr1A_C_albicans_SC5314	macs2	peak	1952877	1953022	ID=peak_988	wt2_H2O2_30_S51455
Ca22chr1A_C_albicans_SC5314	macs2	peak	1953214	1953388	ID=peak_989	wt2_32_S51442,wt2_H2O2_30_S51455
Ca22chr1A_C_albicans_SC5314	macs2	peak	1954989	1955157	ID=peak_990	wt2_32_S51442,wt2_H2O2_30_S51455,wt3_33_S51443,wt3_H2O2_31_S51454,wt4_38_S51444,wt4_H2O2_39_S51445
Ca22chr1A_C_albicans_SC5314	macs2	peak	1955271	1955744	ID=peak_991	wt2_32_S51442,wt2_H2O2_30_S51455,wt3_33_S51443,wt3_H2O2_31_S51454,wt4_38_S51444,wt4_H2O2_39_S51445
Ca22chr1A_C_albicans_SC5314	macs2	peak	1956009	1956283	ID=peak_992	wt2_32_S51442,wt2_H2O2_30_S51455,wt3_33_S51443,wt3_H2O2_31_S51454,wt4_38_S51444,wt4_H2O2_39_S51445
Ca22chr1A_C_albicans_SC5314	macs2	peak	1960125	1960259	ID=peak_993	wt2_32_S51442,wt2_H2O2_30_S51455,wt3_33_S51443,wt3_H2O2_31_S51454,wt4_H2O2_39_S51445
Ca22chr1A_C_albicans_SC5314	macs2	peak	1962216	1962418	ID=peak_994	wt2_32_S51442,wt2_H2O2_30_S51455,wt3_33_S51443,wt3_H2O2_31_S51454,wt4_38_S51444,wt4_H2O2_39_S51445
Ca22chr1A_C_albicans_SC5314	macs2	peak	1964508	1964807	ID=peak_995	wt2_32_S51442,wt2_H2O2_30_S51455,wt3_33_S51443,wt3_H2O2_31_S51454,wt4_38_S51444,wt4_H2O2_39_S51445
Ca22chr1A_C_albicans_SC5314	macs2	peak	1966821	1966994	ID=peak_996	wt2_32_S51442,wt2_H2O2_30_S51455,wt3_33_S51443
Ca22chr1A_C_albicans_SC5314	macs2	peak	1967248	1967446	ID=peak_997	wt2_32_S51442,wt2_H2O2_30_S51455,wt3_33_S51443,wt3_H2O2_31_S51454,wt4_H2O2_39_S51445
Ca22chr1A_C_albicans_SC5314	macs2	peak	1973078	1973180	ID=peak_998	wt2_32_S51442,wt2_H2O2_30_S51455,wt3_H2O2_31_S51454,wt4_H2O2_39_S51445
Ca22chr1A_C_albicans_SC5314	macs2	peak	1973495	1973644	ID=peak_999	wt2_32_S51442,wt2_H2O2_30_S51455,wt3_33_S51443,wt3_H2O2_31_S51454,wt4_38_S51444
Ca22chr1A_C_albicans_SC5314	macs2	peak	1979243	1979719	ID=peak_1000	wt2_32_S51442,wt2_H2O2_30_S51455,wt3_33_S51443,wt3_H2O2_31_S51454,wt4_38_S51444,wt4_H2O2_39_S51445
Ca22chr1A_C_albicans_SC5314	macs2	peak	1980048	1980186	ID=peak_1001	wt2_32_S51442,wt3_33_S51443
Ca22chr1A_C_albicans_SC5314	macs2	peak	1980259	1980600	ID=peak_1002	wt2_32_S51442,wt2_H2O2_30_S51455,wt3_33_S51443,wt3_H2O2_31_S51454,wt4_38_S51444,wt4_H2O2_39_S51445
Ca22chr1A_C_albicans_SC5314	macs2	peak	1984439	1984594	ID=peak_1003	wt2_32_S51442,wt2_H2O2_30_S51455,wt3_33_S51443,wt3_H2O2_31_S51454,wt4_H2O2_39_S51445
Ca22chr1A_C_albicans_SC5314	macs2	peak	1985377	1985555	ID=peak_1004	wt2_32_S51442,wt2_H2O2_30_S51455,wt3_33_S51443,wt3_H2O2_31_S51454,wt4_38_S51444,wt4_H2O2_39_S51445
Ca22chr1A_C_albicans_SC5314	macs2	peak	1989087	1989392	ID=peak_1005	wt2_32_S51442,wt2_H2O2_30_S51455,wt3_33_S51443,wt3_H2O2_31_S51454
Ca22chr1A_C_albicans_SC5314	macs2	peak	1989486	1989728	ID=peak_1006	wt2_32_S51442,wt2_H2O2_30_S51455,wt3_33_S51443,wt3_H2O2_31_S51454,wt4_38_S51444,wt4_H2O2_39_S51445
Ca22chr1A_C_albicans_SC5314	macs2	peak	1990056	1991033	ID=peak_1007	wt2_32_S51442,wt2_H2O2_30_S51455,wt3_33_S51443,wt3_H2O2_31_S51454,wt4_38_S51444,wt4_H2O2_39_S51445
Ca22chr1A_C_albicans_SC5314	macs2	peak	1993633	1993785	ID=peak_1008	wt2_32_S51442,wt3_33_S51443,wt3_H2O2_31_S51454,wt4_H2O2_39_S51445
Ca22chr1A_C_albicans_SC5314	macs2	peak	1995384	1995537	ID=peak_1009	wt2_32_S51442,wt2_H2O2_30_S51455,wt3_33_S51443,wt3_H2O2_31_S51454
Ca22chr1A_C_albicans_SC5314	macs2	peak	1995647	1995889	ID=peak_1010	wt2_32_S51442,wt2_H2O2_30_S51455,wt3_33_S51443,wt3_H2O2_31_S51454
Ca22chr1A_C_albicans_SC5314	macs2	peak	1996024	1996219	ID=peak_1011	wt2_32_S51442,wt2_H2O2_30_S51455,wt3_33_S51443,wt3_H2O2_31_S51454,wt4_38_S51444,wt4_H2O2_39_S51445
Ca22chr1A_C_albicans_SC5314	macs2	peak	2001161	2001453	ID=peak_1012	wt2_32_S51442,wt2_H2O2_30_S51455,wt3_33_S51443,wt3_H2O2_31_S51454,wt4_38_S51444,wt4_H2O2_39_S51445
Ca22chr1A_C_albicans_SC5314	macs2	peak	2002438	2002696	ID=peak_1013	wt2_32_S51442,wt2_H2O2_30_S51455,wt3_33_S51443,wt3_H2O2_31_S51454,wt4_H2O2_39_S51445
Ca22chr1A_C_albicans_SC5314	macs2	peak	2003325	2003758	ID=peak_1014	wt2_H2O2_30_S51455,wt3_H2O2_31_S51454,wt4_H2O2_39_S51445
Ca22chr1A_C_albicans_SC5314	macs2	peak	2003980	2004390	ID=peak_1015	wt2_32_S51442,wt2_H2O2_30_S51455,wt3_33_S51443,wt3_H2O2_31_S51454,wt4_H2O2_39_S51445
Ca22chr1A_C_albicans_SC5314	macs2	peak	2009015	2009096	ID=peak_1016	wt2_H2O2_30_S51455
Ca22chr1A_C_albicans_SC5314	macs2	peak	2009252	2009482	ID=peak_1017	wt2_32_S51442,wt2_H2O2_30_S51455,wt3_33_S51443,wt3_H2O2_31_S51454,wt4_H2O2_39_S51445
Ca22chr1A_C_albicans_SC5314	macs2	peak	2009592	2009776	ID=peak_1018	wt2_32_S51442,wt2_H2O2_30_S51455
Ca22chr1A_C_albicans_SC5314	macs2	peak	2009936	2010123	ID=peak_1019	wt2_32_S51442,wt2_H2O2_30_S51455,wt3_33_S51443,wt3_H2O2_31_S51454,wt4_38_S51444,wt4_H2O2_39_S51445
Ca22chr1A_C_albicans_SC5314	macs2	peak	2012655	2013040	ID=peak_1020	wt2_H2O2_30_S51455,wt3_33_S51443,wt3_H2O2_31_S51454,wt4_H2O2_39_S51445
Ca22chr1A_C_albicans_SC5314	macs2	peak	2014386	2014560	ID=peak_1021	wt2_32_S51442,wt2_H2O2_30_S51455,wt3_33_S51443,wt3_H2O2_31_S51454
Ca22chr1A_C_albicans_SC5314	macs2	peak	2019444	2019613	ID=peak_1022	wt2_32_S51442,wt2_H2O2_30_S51455,wt3_33_S51443,wt3_H2O2_31_S51454,wt4_38_S51444,wt4_H2O2_39_S51445
Ca22chr1A_C_albicans_SC5314	macs2	peak	2019966	2020129	ID=peak_1023	wt2_32_S51442,wt3_33_S51443,wt3_H2O2_31_S51454,wt4_38_S51444,wt4_H2O2_39_S51445
Ca22chr1A_C_albicans_SC5314	macs2	peak	2024243	2024312	ID=peak_1024	wt2_32_S51442
Ca22chr1A_C_albicans_SC5314	macs2	peak	2024451	2024915	ID=peak_1025	wt2_32_S51442,wt2_H2O2_30_S51455,wt3_33_S51443,wt3_H2O2_31_S51454,wt4_H2O2_39_S51445
Ca22chr1A_C_albicans_SC5314	macs2	peak	2025290	2025481	ID=peak_1026	wt2_H2O2_30_S51455,wt3_33_S51443,wt3_H2O2_31_S51454
Ca22chr1A_C_albicans_SC5314	macs2	peak	2025650	2025756	ID=peak_1027	wt2_H2O2_30_S51455,wt3_33_S51443
Ca22chr1A_C_albicans_SC5314	macs2	peak	2028311	2028444	ID=peak_1028	wt2_32_S51442,wt2_H2O2_30_S51455,wt3_33_S51443,wt3_H2O2_31_S51454,wt4_H2O2_39_S51445
Ca22chr1A_C_albicans_SC5314	macs2	peak	2030063	2030167	ID=peak_1029	wt2_32_S51442,wt3_H2O2_31_S51454
Ca22chr1A_C_albicans_SC5314	macs2	peak	2030329	2030581	ID=peak_1030	wt2_H2O2_30_S51455,wt3_H2O2_31_S51454,wt4_H2O2_39_S51445
Ca22chr1A_C_albicans_SC5314	macs2	peak	2030737	2030886	ID=peak_1031	wt2_32_S51442,wt2_H2O2_30_S51455,wt3_33_S51443,wt3_H2O2_31_S51454,wt4_H2O2_39_S51445
Ca22chr1A_C_albicans_SC5314	macs2	peak	2034390	2034556	ID=peak_1032	wt3_H2O2_31_S51454
Ca22chr1A_C_albicans_SC5314	macs2	peak	2036090	2036183	ID=peak_1033	wt2_32_S51442,wt2_H2O2_30_S51455,wt3_H2O2_31_S51454
Ca22chr1A_C_albicans_SC5314	macs2	peak	2044218	2044326	ID=peak_1034	wt2_32_S51442,wt2_H2O2_30_S51455,wt3_H2O2_31_S51454
Ca22chr1A_C_albicans_SC5314	macs2	peak	2045589	2045688	ID=peak_1035	wt2_32_S51442,wt2_H2O2_30_S51455,wt3_33_S51443
Ca22chr1A_C_albicans_SC5314	macs2	peak	2049104	2049186	ID=peak_1036	wt3_H2O2_31_S51454
Ca22chr1A_C_albicans_SC5314	macs2	peak	2051925	2052409	ID=peak_1037	wt2_32_S51442,wt2_H2O2_30_S51455,wt3_33_S51443,wt3_H2O2_31_S51454,wt4_38_S51444,wt4_H2O2_39_S51445
Ca22chr1A_C_albicans_SC5314	macs2	peak	2052506	2052876	ID=peak_1038	wt2_32_S51442,wt2_H2O2_30_S51455,wt3_33_S51443,wt3_H2O2_31_S51454,wt4_H2O2_39_S51445
Ca22chr1A_C_albicans_SC5314	macs2	peak	2052955	2053107	ID=peak_1039	wt2_32_S51442,wt2_H2O2_30_S51455,wt3_H2O2_31_S51454
Ca22chr1A_C_albicans_SC5314	macs2	peak	2053209	2053394	ID=peak_1040	wt2_32_S51442,wt2_H2O2_30_S51455,wt3_33_S51443,wt3_H2O2_31_S51454
Ca22chr1A_C_albicans_SC5314	macs2	peak	2054740	2054886	ID=peak_1041	wt2_32_S51442,wt2_H2O2_30_S51455,wt3_33_S51443,wt3_H2O2_31_S51454,wt4_H2O2_39_S51445
Ca22chr1A_C_albicans_SC5314	macs2	peak	2060604	2060708	ID=peak_1042	wt2_32_S51442,wt2_H2O2_30_S51455,wt3_33_S51443
Ca22chr1A_C_albicans_SC5314	macs2	peak	2064812	2064996	ID=peak_1043	wt2_32_S51442,wt2_H2O2_30_S51455,wt3_33_S51443,wt3_H2O2_31_S51454
Ca22chr1A_C_albicans_SC5314	macs2	peak	2065559	2065771	ID=peak_1044	wt2_32_S51442,wt2_H2O2_30_S51455,wt3_33_S51443,wt3_H2O2_31_S51454,wt4_38_S51444,wt4_H2O2_39_S51445
Ca22chr1A_C_albicans_SC5314	macs2	peak	2067658	2067807	ID=peak_1045	wt2_32_S51442,wt2_H2O2_30_S51455,wt3_33_S51443,wt3_H2O2_31_S51454,wt4_38_S51444,wt4_H2O2_39_S51445
Ca22chr1A_C_albicans_SC5314	macs2	peak	2070271	2070386	ID=peak_1046	wt2_32_S51442,wt2_H2O2_30_S51455,wt3_33_S51443,wt3_H2O2_31_S51454
Ca22chr1A_C_albicans_SC5314	macs2	peak	2073382	2073543	ID=peak_1047	wt2_32_S51442,wt2_H2O2_30_S51455,wt3_33_S51443,wt3_H2O2_31_S51454
Ca22chr1A_C_albicans_SC5314	macs2	peak	2076978	2077391	ID=peak_1048	wt2_32_S51442,wt2_H2O2_30_S51455,wt3_33_S51443,wt3_H2O2_31_S51454,wt4_38_S51444,wt4_H2O2_39_S51445
Ca22chr1A_C_albicans_SC5314	macs2	peak	2080561	2080723	ID=peak_1049	wt2_32_S51442,wt2_H2O2_30_S51455,wt3_33_S51443,wt3_H2O2_31_S51454,wt4_38_S51444,wt4_H2O2_39_S51445
Ca22chr1A_C_albicans_SC5314	macs2	peak	2087034	2087271	ID=peak_1050	wt2_32_S51442,wt2_H2O2_30_S51455,wt3_33_S51443,wt3_H2O2_31_S51454
Ca22chr1A_C_albicans_SC5314	macs2	peak	2092097	2092252	ID=peak_1051	wt2_32_S51442,wt2_H2O2_30_S51455,wt3_33_S51443,wt3_H2O2_31_S51454
Ca22chr1A_C_albicans_SC5314	macs2	peak	2093003	2093085	ID=peak_1052	wt2_32_S51442
Ca22chr1A_C_albicans_SC5314	macs2	peak	2096054	2096194	ID=peak_1053	wt2_32_S51442,wt2_H2O2_30_S51455,wt3_H2O2_31_S51454
Ca22chr1A_C_albicans_SC5314	macs2	peak	2096360	2096461	ID=peak_1054	wt2_32_S51442,wt2_H2O2_30_S51455
Ca22chr1A_C_albicans_SC5314	macs2	peak	2098267	2098527	ID=peak_1055	wt2_32_S51442,wt2_H2O2_30_S51455,wt3_33_S51443,wt3_H2O2_31_S51454,wt4_38_S51444,wt4_H2O2_39_S51445
Ca22chr1A_C_albicans_SC5314	macs2	peak	2098690	2098823	ID=peak_1056	wt2_32_S51442,wt2_H2O2_30_S51455,wt3_33_S51443,wt3_H2O2_31_S51454
Ca22chr1A_C_albicans_SC5314	macs2	peak	2099257	2099549	ID=peak_1057	wt2_32_S51442,wt2_H2O2_30_S51455,wt3_33_S51443
Ca22chr1A_C_albicans_SC5314	macs2	peak	2099685	2099948	ID=peak_1058	wt2_32_S51442,wt2_H2O2_30_S51455,wt3_33_S51443,wt3_H2O2_31_S51454,wt4_38_S51444,wt4_H2O2_39_S51445
Ca22chr1A_C_albicans_SC5314	macs2	peak	2100059	2100135	ID=peak_1059	wt4_38_S51444
Ca22chr1A_C_albicans_SC5314	macs2	peak	2100217	2100359	ID=peak_1060	wt2_32_S51442,wt3_33_S51443,wt4_38_S51444
Ca22chr1A_C_albicans_SC5314	macs2	peak	2100889	2101466	ID=peak_1061	wt2_32_S51442,wt2_H2O2_30_S51455,wt3_33_S51443,wt3_H2O2_31_S51454,wt4_38_S51444,wt4_H2O2_39_S51445
Ca22chr1A_C_albicans_SC5314	macs2	peak	2104625	2104963	ID=peak_1062	wt2_32_S51442,wt3_33_S51443,wt4_38_S51444,wt4_H2O2_39_S51445
Ca22chr1A_C_albicans_SC5314	macs2	peak	2105062	2105563	ID=peak_1063	wt2_32_S51442,wt2_H2O2_30_S51455,wt3_33_S51443,wt3_H2O2_31_S51454,wt4_38_S51444,wt4_H2O2_39_S51445
Ca22chr1A_C_albicans_SC5314	macs2	peak	2105813	2105973	ID=peak_1064	wt2_32_S51442,wt2_H2O2_30_S51455,wt3_33_S51443,wt3_H2O2_31_S51454,wt4_H2O2_39_S51445
Ca22chr1A_C_albicans_SC5314	macs2	peak	2106753	2106922	ID=peak_1065	wt2_32_S51442,wt2_H2O2_30_S51455,wt3_33_S51443,wt3_H2O2_31_S51454,wt4_38_S51444,wt4_H2O2_39_S51445
Ca22chr1A_C_albicans_SC5314	macs2	peak	2117105	2117476	ID=peak_1066	wt2_32_S51442,wt2_H2O2_30_S51455,wt3_33_S51443,wt3_H2O2_31_S51454,wt4_38_S51444,wt4_H2O2_39_S51445
Ca22chr1A_C_albicans_SC5314	macs2	peak	2119232	2119335	ID=peak_1067	wt2_32_S51442,wt2_H2O2_30_S51455,wt3_H2O2_31_S51454
Ca22chr1A_C_albicans_SC5314	macs2	peak	2119733	2119920	ID=peak_1068	wt2_32_S51442,wt2_H2O2_30_S51455,wt3_33_S51443,wt3_H2O2_31_S51454,wt4_H2O2_39_S51445
Ca22chr1A_C_albicans_SC5314	macs2	peak	2120006	2120239	ID=peak_1069	wt2_32_S51442,wt2_H2O2_30_S51455,wt3_33_S51443,wt3_H2O2_31_S51454,wt4_H2O2_39_S51445
Ca22chr1A_C_albicans_SC5314	macs2	peak	2121732	2122044	ID=peak_1070	wt2_32_S51442,wt2_H2O2_30_S51455,wt3_33_S51443,wt3_H2O2_31_S51454,wt4_38_S51444,wt4_H2O2_39_S51445
Ca22chr1A_C_albicans_SC5314	macs2	peak	2123606	2123729	ID=peak_1071	wt2_32_S51442,wt2_H2O2_30_S51455,wt3_H2O2_31_S51454
Ca22chr1A_C_albicans_SC5314	macs2	peak	2125765	2125954	ID=peak_1072	wt2_H2O2_30_S51455,wt3_H2O2_31_S51454
Ca22chr1A_C_albicans_SC5314	macs2	peak	2126071	2126208	ID=peak_1073	wt2_32_S51442,wt2_H2O2_30_S51455,wt3_33_S51443,wt3_H2O2_31_S51454,wt4_38_S51444,wt4_H2O2_39_S51445
Ca22chr1A_C_albicans_SC5314	macs2	peak	2129001	2129145	ID=peak_1074	wt2_32_S51442,wt2_H2O2_30_S51455,wt3_33_S51443,wt3_H2O2_31_S51454,wt4_H2O2_39_S51445
Ca22chr1A_C_albicans_SC5314	macs2	peak	2129434	2129556	ID=peak_1075	wt2_32_S51442,wt2_H2O2_30_S51455,wt3_33_S51443,wt3_H2O2_31_S51454
Ca22chr1A_C_albicans_SC5314	macs2	peak	2130941	2131013	ID=peak_1076	wt4_H2O2_39_S51445
Ca22chr1A_C_albicans_SC5314	macs2	peak	2131268	2132063	ID=peak_1077	wt2_32_S51442,wt2_H2O2_30_S51455,wt3_33_S51443,wt3_H2O2_31_S51454,wt4_38_S51444,wt4_H2O2_39_S51445
Ca22chr1A_C_albicans_SC5314	macs2	peak	2133354	2133438	ID=peak_1078	wt3_H2O2_31_S51454
Ca22chr1A_C_albicans_SC5314	macs2	peak	2133599	2133768	ID=peak_1079	wt3_H2O2_31_S51454
Ca22chr1A_C_albicans_SC5314	macs2	peak	2136535	2136784	ID=peak_1080	wt2_32_S51442,wt2_H2O2_30_S51455,wt3_33_S51443,wt3_H2O2_31_S51454,wt4_38_S51444,wt4_H2O2_39_S51445
Ca22chr1A_C_albicans_SC5314	macs2	peak	2140039	2140116	ID=peak_1081	wt4_38_S51444
Ca22chr1A_C_albicans_SC5314	macs2	peak	2141806	2141895	ID=peak_1082	wt2_32_S51442,wt2_H2O2_30_S51455,wt3_33_S51443,wt3_H2O2_31_S51454
Ca22chr1A_C_albicans_SC5314	macs2	peak	2145013	2145269	ID=peak_1083	wt2_H2O2_30_S51455,wt3_H2O2_31_S51454
Ca22chr1A_C_albicans_SC5314	macs2	peak	2146629	2146707	ID=peak_1084	wt2_32_S51442,wt3_H2O2_31_S51454
Ca22chr1A_C_albicans_SC5314	macs2	peak	2147555	2147783	ID=peak_1085	wt2_32_S51442,wt2_H2O2_30_S51455,wt3_33_S51443,wt3_H2O2_31_S51454,wt4_38_S51444
Ca22chr1A_C_albicans_SC5314	macs2	peak	2155229	2155491	ID=peak_1086	wt2_32_S51442,wt2_H2O2_30_S51455,wt3_33_S51443,wt3_H2O2_31_S51454,wt4_38_S51444,wt4_H2O2_39_S51445
Ca22chr1A_C_albicans_SC5314	macs2	peak	2155730	2155804	ID=peak_1087	wt4_H2O2_39_S51445
Ca22chr1A_C_albicans_SC5314	macs2	peak	2158018	2158257	ID=peak_1088	wt2_32_S51442,wt2_H2O2_30_S51455,wt3_33_S51443,wt3_H2O2_31_S51454,wt4_38_S51444,wt4_H2O2_39_S51445
Ca22chr1A_C_albicans_SC5314	macs2	peak	2159920	2160046	ID=peak_1089	wt2_32_S51442,wt3_33_S51443,wt3_H2O2_31_S51454
Ca22chr1A_C_albicans_SC5314	macs2	peak	2160259	2160575	ID=peak_1090	wt2_32_S51442,wt2_H2O2_30_S51455,wt3_33_S51443
Ca22chr1A_C_albicans_SC5314	macs2	peak	2160711	2161002	ID=peak_1091	wt2_32_S51442,wt2_H2O2_30_S51455,wt3_33_S51443,wt3_H2O2_31_S51454
Ca22chr1A_C_albicans_SC5314	macs2	peak	2163759	2163889	ID=peak_1092	wt2_32_S51442,wt3_33_S51443,wt4_38_S51444
Ca22chr1A_C_albicans_SC5314	macs2	peak	2163998	2164281	ID=peak_1093	wt2_32_S51442,wt2_H2O2_30_S51455,wt3_33_S51443,wt3_H2O2_31_S51454,wt4_38_S51444,wt4_H2O2_39_S51445
Ca22chr1A_C_albicans_SC5314	macs2	peak	2168843	2169355	ID=peak_1094	wt2_32_S51442,wt2_H2O2_30_S51455,wt3_33_S51443,wt3_H2O2_31_S51454,wt4_38_S51444,wt4_H2O2_39_S51445
Ca22chr1A_C_albicans_SC5314	macs2	peak	2169456	2169662	ID=peak_1095	wt2_32_S51442,wt2_H2O2_30_S51455,wt3_33_S51443,wt3_H2O2_31_S51454,wt4_38_S51444,wt4_H2O2_39_S51445
Ca22chr1A_C_albicans_SC5314	macs2	peak	2178323	2178400	ID=peak_1096	wt2_32_S51442
Ca22chr1A_C_albicans_SC5314	macs2	peak	2179899	2180049	ID=peak_1097	wt2_32_S51442,wt2_H2O2_30_S51455,wt3_33_S51443,wt3_H2O2_31_S51454,wt4_H2O2_39_S51445
Ca22chr1A_C_albicans_SC5314	macs2	peak	2180791	2180875	ID=peak_1098	wt2_32_S51442,wt3_33_S51443
Ca22chr1A_C_albicans_SC5314	macs2	peak	2186049	2186174	ID=peak_1099	wt2_32_S51442
Ca22chr1A_C_albicans_SC5314	macs2	peak	2186233	2186489	ID=peak_1100	wt2_32_S51442,wt2_H2O2_30_S51455,wt3_33_S51443,wt3_H2O2_31_S51454,wt4_38_S51444
Ca22chr1A_C_albicans_SC5314	macs2	peak	2186843	2187027	ID=peak_1101	wt2_32_S51442,wt2_H2O2_30_S51455,wt3_H2O2_31_S51454
Ca22chr1A_C_albicans_SC5314	macs2	peak	2187223	2187356	ID=peak_1102	wt2_32_S51442,wt2_H2O2_30_S51455,wt3_33_S51443,wt3_H2O2_31_S51454,wt4_38_S51444,wt4_H2O2_39_S51445
Ca22chr1A_C_albicans_SC5314	macs2	peak	2192702	2192888	ID=peak_1103	wt2_32_S51442,wt2_H2O2_30_S51455,wt3_33_S51443,wt3_H2O2_31_S51454,wt4_H2O2_39_S51445
Ca22chr1A_C_albicans_SC5314	macs2	peak	2193072	2193414	ID=peak_1104	wt2_32_S51442,wt2_H2O2_30_S51455,wt3_33_S51443,wt3_H2O2_31_S51454,wt4_H2O2_39_S51445
Ca22chr1A_C_albicans_SC5314	macs2	peak	2193476	2194665	ID=peak_1105	wt2_32_S51442,wt2_H2O2_30_S51455,wt3_33_S51443,wt3_H2O2_31_S51454,wt4_38_S51444,wt4_H2O2_39_S51445
Ca22chr1A_C_albicans_SC5314	macs2	peak	2196805	2196998	ID=peak_1106	wt2_32_S51442,wt2_H2O2_30_S51455,wt3_33_S51443,wt3_H2O2_31_S51454,wt4_H2O2_39_S51445
Ca22chr1A_C_albicans_SC5314	macs2	peak	2198483	2198608	ID=peak_1107	wt2_32_S51442,wt2_H2O2_30_S51455,wt3_H2O2_31_S51454
Ca22chr1A_C_albicans_SC5314	macs2	peak	2198751	2199591	ID=peak_1108	wt2_32_S51442,wt2_H2O2_30_S51455,wt3_33_S51443,wt3_H2O2_31_S51454,wt4_H2O2_39_S51445
Ca22chr1A_C_albicans_SC5314	macs2	peak	2201700	2201827	ID=peak_1109	wt2_H2O2_30_S51455,wt4_H2O2_39_S51445
Ca22chr1A_C_albicans_SC5314	macs2	peak	2204376	2204476	ID=peak_1110	wt2_32_S51442,wt2_H2O2_30_S51455,wt3_33_S51443,wt3_H2O2_31_S51454
Ca22chr1A_C_albicans_SC5314	macs2	peak	2204917	2205338	ID=peak_1111	wt2_H2O2_30_S51455,wt3_H2O2_31_S51454,wt4_H2O2_39_S51445
Ca22chr1A_C_albicans_SC5314	macs2	peak	2207631	2208268	ID=peak_1112	wt2_32_S51442,wt2_H2O2_30_S51455,wt3_33_S51443,wt3_H2O2_31_S51454,wt4_38_S51444,wt4_H2O2_39_S51445
Ca22chr1A_C_albicans_SC5314	macs2	peak	2212026	2212136	ID=peak_1113	wt2_32_S51442,wt2_H2O2_30_S51455,wt3_33_S51443,wt3_H2O2_31_S51454,wt4_H2O2_39_S51445
Ca22chr1A_C_albicans_SC5314	macs2	peak	2212790	2212956	ID=peak_1114	wt2_32_S51442,wt2_H2O2_30_S51455,wt3_33_S51443,wt3_H2O2_31_S51454,wt4_H2O2_39_S51445
Ca22chr1A_C_albicans_SC5314	macs2	peak	2217263	2217407	ID=peak_1115	wt2_32_S51442,wt2_H2O2_30_S51455,wt3_33_S51443,wt3_H2O2_31_S51454,wt4_H2O2_39_S51445
Ca22chr1A_C_albicans_SC5314	macs2	peak	2220985	2221087	ID=peak_1116	wt2_32_S51442,wt2_H2O2_30_S51455,wt3_H2O2_31_S51454,wt4_H2O2_39_S51445
Ca22chr1A_C_albicans_SC5314	macs2	peak	2224740	2224952	ID=peak_1117	wt2_32_S51442,wt2_H2O2_30_S51455,wt3_33_S51443,wt3_H2O2_31_S51454,wt4_38_S51444,wt4_H2O2_39_S51445
Ca22chr1A_C_albicans_SC5314	macs2	peak	2226079	2226157	ID=peak_1118	wt2_32_S51442
Ca22chr1A_C_albicans_SC5314	macs2	peak	2227837	2228009	ID=peak_1119	wt2_32_S51442,wt2_H2O2_30_S51455,wt3_33_S51443,wt3_H2O2_31_S51454
Ca22chr1A_C_albicans_SC5314	macs2	peak	2228230	2228317	ID=peak_1120	wt2_32_S51442,wt3_33_S51443
Ca22chr1A_C_albicans_SC5314	macs2	peak	2229438	2229525	ID=peak_1121	wt2_32_S51442
Ca22chr1A_C_albicans_SC5314	macs2	peak	2233826	2234023	ID=peak_1122	wt2_32_S51442,wt2_H2O2_30_S51455,wt3_33_S51443,wt3_H2O2_31_S51454
Ca22chr1A_C_albicans_SC5314	macs2	peak	2235580	2235665	ID=peak_1123	wt2_32_S51442
Ca22chr1A_C_albicans_SC5314	macs2	peak	2235812	2236119	ID=peak_1124	wt2_32_S51442,wt2_H2O2_30_S51455,wt3_33_S51443,wt3_H2O2_31_S51454,wt4_38_S51444,wt4_H2O2_39_S51445
Ca22chr1A_C_albicans_SC5314	macs2	peak	2238515	2238682	ID=peak_1125	wt2_32_S51442,wt2_H2O2_30_S51455,wt3_33_S51443,wt3_H2O2_31_S51454,wt4_38_S51444,wt4_H2O2_39_S51445
Ca22chr1A_C_albicans_SC5314	macs2	peak	2242703	2243176	ID=peak_1126	wt2_32_S51442,wt2_H2O2_30_S51455,wt3_33_S51443,wt3_H2O2_31_S51454,wt4_38_S51444,wt4_H2O2_39_S51445
Ca22chr1A_C_albicans_SC5314	macs2	peak	2243320	2243389	ID=peak_1127	wt2_H2O2_30_S51455
Ca22chr1A_C_albicans_SC5314	macs2	peak	2243434	2243972	ID=peak_1128	wt2_32_S51442,wt2_H2O2_30_S51455,wt3_H2O2_31_S51454,wt4_38_S51444,wt4_H2O2_39_S51445
Ca22chr1A_C_albicans_SC5314	macs2	peak	2248926	2249118	ID=peak_1129	wt2_32_S51442,wt2_H2O2_30_S51455,wt3_33_S51443,wt3_H2O2_31_S51454,wt4_H2O2_39_S51445
Ca22chr1A_C_albicans_SC5314	macs2	peak	2253256	2253406	ID=peak_1130	wt2_32_S51442,wt2_H2O2_30_S51455,wt3_33_S51443,wt3_H2O2_31_S51454,wt4_38_S51444,wt4_H2O2_39_S51445
Ca22chr1A_C_albicans_SC5314	macs2	peak	2253565	2253749	ID=peak_1131	wt2_32_S51442,wt3_33_S51443
Ca22chr1A_C_albicans_SC5314	macs2	peak	2254010	2254171	ID=peak_1132	wt2_32_S51442,wt2_H2O2_30_S51455,wt3_33_S51443
Ca22chr1A_C_albicans_SC5314	macs2	peak	2256937	2257685	ID=peak_1133	wt2_32_S51442,wt2_H2O2_30_S51455,wt3_33_S51443,wt3_H2O2_31_S51454,wt4_38_S51444,wt4_H2O2_39_S51445
Ca22chr1A_C_albicans_SC5314	macs2	peak	2257770	2258819	ID=peak_1134	wt2_32_S51442,wt2_H2O2_30_S51455,wt3_33_S51443,wt3_H2O2_31_S51454,wt4_38_S51444,wt4_H2O2_39_S51445
Ca22chr1A_C_albicans_SC5314	macs2	peak	2263711	2263780	ID=peak_1135	wt2_32_S51442
Ca22chr1A_C_albicans_SC5314	macs2	peak	2264795	2264870	ID=peak_1136	wt2_H2O2_30_S51455
Ca22chr1A_C_albicans_SC5314	macs2	peak	2265873	2265986	ID=peak_1137	wt2_32_S51442,wt2_H2O2_30_S51455,wt3_33_S51443
Ca22chr1A_C_albicans_SC5314	macs2	peak	2266964	2267104	ID=peak_1138	wt2_32_S51442,wt2_H2O2_30_S51455,wt3_33_S51443,wt3_H2O2_31_S51454
Ca22chr1A_C_albicans_SC5314	macs2	peak	2268429	2268528	ID=peak_1139	wt2_H2O2_30_S51455
Ca22chr1A_C_albicans_SC5314	macs2	peak	2269332	2269623	ID=peak_1140	wt2_32_S51442,wt2_H2O2_30_S51455,wt3_33_S51443,wt3_H2O2_31_S51454,wt4_H2O2_39_S51445
Ca22chr1A_C_albicans_SC5314	macs2	peak	2269993	2270135	ID=peak_1141	wt2_H2O2_30_S51455,wt3_H2O2_31_S51454
Ca22chr1A_C_albicans_SC5314	macs2	peak	2271034	2271232	ID=peak_1142	wt2_32_S51442,wt2_H2O2_30_S51455,wt3_33_S51443,wt3_H2O2_31_S51454,wt4_H2O2_39_S51445
Ca22chr1A_C_albicans_SC5314	macs2	peak	2274607	2274945	ID=peak_1143	wt2_32_S51442,wt2_H2O2_30_S51455,wt3_33_S51443,wt3_H2O2_31_S51454
Ca22chr1A_C_albicans_SC5314	macs2	peak	2274974	2275566	ID=peak_1144	wt2_32_S51442,wt2_H2O2_30_S51455,wt3_33_S51443,wt3_H2O2_31_S51454,wt4_38_S51444,wt4_H2O2_39_S51445
Ca22chr1A_C_albicans_SC5314	macs2	peak	2275754	2276075	ID=peak_1145	wt2_32_S51442,wt2_H2O2_30_S51455,wt3_33_S51443,wt3_H2O2_31_S51454,wt4_38_S51444,wt4_H2O2_39_S51445
Ca22chr1A_C_albicans_SC5314	macs2	peak	2279092	2279877	ID=peak_1146	wt2_32_S51442,wt2_H2O2_30_S51455,wt3_33_S51443,wt3_H2O2_31_S51454,wt4_38_S51444,wt4_H2O2_39_S51445
Ca22chr1A_C_albicans_SC5314	macs2	peak	2281477	2281616	ID=peak_1147	wt2_H2O2_30_S51455
Ca22chr1A_C_albicans_SC5314	macs2	peak	2281799	2282076	ID=peak_1148	wt2_32_S51442,wt2_H2O2_30_S51455,wt3_33_S51443,wt3_H2O2_31_S51454,wt4_H2O2_39_S51445
Ca22chr1A_C_albicans_SC5314	macs2	peak	2289141	2289221	ID=peak_1149	wt2_32_S51442,wt2_H2O2_30_S51455,wt3_H2O2_31_S51454
Ca22chr1A_C_albicans_SC5314	macs2	peak	2289463	2289690	ID=peak_1150	wt2_32_S51442,wt2_H2O2_30_S51455,wt3_33_S51443,wt3_H2O2_31_S51454,wt4_38_S51444,wt4_H2O2_39_S51445
Ca22chr1A_C_albicans_SC5314	macs2	peak	2289807	2290297	ID=peak_1151	wt2_32_S51442,wt2_H2O2_30_S51455,wt3_33_S51443,wt3_H2O2_31_S51454,wt4_H2O2_39_S51445
Ca22chr1A_C_albicans_SC5314	macs2	peak	2290553	2290910	ID=peak_1152	wt2_32_S51442,wt2_H2O2_30_S51455,wt3_33_S51443,wt3_H2O2_31_S51454,wt4_38_S51444,wt4_H2O2_39_S51445
Ca22chr1A_C_albicans_SC5314	macs2	peak	2291071	2291556	ID=peak_1153	wt2_32_S51442,wt2_H2O2_30_S51455,wt3_33_S51443,wt3_H2O2_31_S51454,wt4_38_S51444,wt4_H2O2_39_S51445
Ca22chr1A_C_albicans_SC5314	macs2	peak	2291714	2292072	ID=peak_1154	wt2_32_S51442,wt2_H2O2_30_S51455,wt3_33_S51443,wt3_H2O2_31_S51454
Ca22chr1A_C_albicans_SC5314	macs2	peak	2292148	2292348	ID=peak_1155	wt2_H2O2_30_S51455,wt3_H2O2_31_S51454
Ca22chr1A_C_albicans_SC5314	macs2	peak	2292433	2292640	ID=peak_1156	wt2_H2O2_30_S51455,wt3_H2O2_31_S51454
Ca22chr1A_C_albicans_SC5314	macs2	peak	2293235	2293316	ID=peak_1157	wt2_H2O2_30_S51455
Ca22chr1A_C_albicans_SC5314	macs2	peak	2294953	2296675	ID=peak_1158	wt2_32_S51442,wt2_H2O2_30_S51455,wt3_33_S51443,wt3_H2O2_31_S51454,wt4_38_S51444,wt4_H2O2_39_S51445
Ca22chr1A_C_albicans_SC5314	macs2	peak	2299334	2299626	ID=peak_1159	wt2_32_S51442,wt2_H2O2_30_S51455,wt3_33_S51443,wt3_H2O2_31_S51454
Ca22chr1A_C_albicans_SC5314	macs2	peak	2300595	2301017	ID=peak_1160	wt2_32_S51442,wt2_H2O2_30_S51455,wt3_33_S51443,wt3_H2O2_31_S51454,wt4_H2O2_39_S51445
Ca22chr1A_C_albicans_SC5314	macs2	peak	2302152	2302263	ID=peak_1161	wt2_H2O2_30_S51455
Ca22chr1A_C_albicans_SC5314	macs2	peak	2302413	2302737	ID=peak_1162	wt2_32_S51442,wt2_H2O2_30_S51455,wt3_33_S51443,wt3_H2O2_31_S51454,wt4_H2O2_39_S51445
Ca22chr1A_C_albicans_SC5314	macs2	peak	2303379	2303600	ID=peak_1163	wt2_32_S51442,wt2_H2O2_30_S51455,wt3_33_S51443,wt3_H2O2_31_S51454,wt4_H2O2_39_S51445
Ca22chr1A_C_albicans_SC5314	macs2	peak	2303878	2303963	ID=peak_1164	wt2_H2O2_30_S51455,wt3_H2O2_31_S51454
Ca22chr1A_C_albicans_SC5314	macs2	peak	2307172	2307258	ID=peak_1165	wt2_32_S51442,wt3_H2O2_31_S51454
Ca22chr1A_C_albicans_SC5314	macs2	peak	2307438	2307571	ID=peak_1166	wt2_32_S51442,wt2_H2O2_30_S51455,wt3_33_S51443,wt3_H2O2_31_S51454
Ca22chr1A_C_albicans_SC5314	macs2	peak	2310799	2311011	ID=peak_1167	wt2_32_S51442,wt2_H2O2_30_S51455,wt3_33_S51443,wt3_H2O2_31_S51454,wt4_H2O2_39_S51445
Ca22chr1A_C_albicans_SC5314	macs2	peak	2313659	2314856	ID=peak_1168	wt2_32_S51442,wt2_H2O2_30_S51455,wt3_33_S51443,wt3_H2O2_31_S51454,wt4_38_S51444,wt4_H2O2_39_S51445
Ca22chr1A_C_albicans_SC5314	macs2	peak	2316185	2316419	ID=peak_1169	wt2_H2O2_30_S51455,wt3_33_S51443,wt3_H2O2_31_S51454
Ca22chr1A_C_albicans_SC5314	macs2	peak	2317998	2318175	ID=peak_1170	wt2_32_S51442,wt2_H2O2_30_S51455,wt3_33_S51443,wt3_H2O2_31_S51454,wt4_38_S51444,wt4_H2O2_39_S51445
Ca22chr1A_C_albicans_SC5314	macs2	peak	2319294	2319416	ID=peak_1171	wt2_H2O2_30_S51455,wt3_33_S51443
Ca22chr1A_C_albicans_SC5314	macs2	peak	2321285	2321412	ID=peak_1172	wt2_32_S51442,wt2_H2O2_30_S51455,wt3_33_S51443,wt3_H2O2_31_S51454,wt4_38_S51444,wt4_H2O2_39_S51445
Ca22chr1A_C_albicans_SC5314	macs2	peak	2323602	2323762	ID=peak_1173	wt2_32_S51442,wt2_H2O2_30_S51455,wt3_33_S51443,wt3_H2O2_31_S51454,wt4_38_S51444,wt4_H2O2_39_S51445
Ca22chr1A_C_albicans_SC5314	macs2	peak	2326782	2326968	ID=peak_1174	wt2_32_S51442,wt2_H2O2_30_S51455,wt3_33_S51443,wt3_H2O2_31_S51454,wt4_38_S51444,wt4_H2O2_39_S51445
Ca22chr1A_C_albicans_SC5314	macs2	peak	2329801	2330001	ID=peak_1175	wt2_32_S51442,wt2_H2O2_30_S51455,wt3_33_S51443,wt3_H2O2_31_S51454,wt4_H2O2_39_S51445
Ca22chr1A_C_albicans_SC5314	macs2	peak	2336739	2336814	ID=peak_1176	wt2_32_S51442
Ca22chr1A_C_albicans_SC5314	macs2	peak	2344792	2345098	ID=peak_1177	wt2_32_S51442,wt2_H2O2_30_S51455,wt3_33_S51443,wt3_H2O2_31_S51454,wt4_H2O2_39_S51445
Ca22chr1A_C_albicans_SC5314	macs2	peak	2345403	2345537	ID=peak_1178	wt2_32_S51442
Ca22chr1A_C_albicans_SC5314	macs2	peak	2345737	2346042	ID=peak_1179	wt2_32_S51442,wt2_H2O2_30_S51455,wt3_33_S51443,wt4_38_S51444
Ca22chr1A_C_albicans_SC5314	macs2	peak	2346374	2346496	ID=peak_1180	wt2_32_S51442,wt3_33_S51443
Ca22chr1A_C_albicans_SC5314	macs2	peak	2347449	2347524	ID=peak_1181	wt3_33_S51443
Ca22chr1A_C_albicans_SC5314	macs2	peak	2348085	2348452	ID=peak_1182	wt2_32_S51442,wt2_H2O2_30_S51455,wt3_33_S51443,wt3_H2O2_31_S51454,wt4_38_S51444,wt4_H2O2_39_S51445
Ca22chr1A_C_albicans_SC5314	macs2	peak	2348584	2348879	ID=peak_1183	wt2_32_S51442,wt2_H2O2_30_S51455,wt3_33_S51443,wt3_H2O2_31_S51454,wt4_38_S51444,wt4_H2O2_39_S51445
Ca22chr1A_C_albicans_SC5314	macs2	peak	2349417	2349716	ID=peak_1184	wt2_32_S51442,wt2_H2O2_30_S51455,wt3_33_S51443,wt3_H2O2_31_S51454
Ca22chr1A_C_albicans_SC5314	macs2	peak	2359239	2359720	ID=peak_1185	wt2_32_S51442,wt2_H2O2_30_S51455,wt3_33_S51443,wt3_H2O2_31_S51454,wt4_H2O2_39_S51445
Ca22chr1A_C_albicans_SC5314	macs2	peak	2359934	2360059	ID=peak_1186	wt2_32_S51442,wt2_H2O2_30_S51455,wt3_H2O2_31_S51454
Ca22chr1A_C_albicans_SC5314	macs2	peak	2360344	2360577	ID=peak_1187	wt2_32_S51442,wt2_H2O2_30_S51455,wt3_33_S51443,wt3_H2O2_31_S51454
Ca22chr1A_C_albicans_SC5314	macs2	peak	2360744	2360890	ID=peak_1188	wt2_H2O2_30_S51455
Ca22chr1A_C_albicans_SC5314	macs2	peak	2362304	2362627	ID=peak_1189	wt2_32_S51442,wt2_H2O2_30_S51455,wt3_33_S51443,wt3_H2O2_31_S51454
Ca22chr1A_C_albicans_SC5314	macs2	peak	2369364	2369459	ID=peak_1190	wt2_32_S51442,wt2_H2O2_30_S51455
Ca22chr1A_C_albicans_SC5314	macs2	peak	2373563	2373655	ID=peak_1191	wt2_32_S51442,wt2_H2O2_30_S51455
Ca22chr1A_C_albicans_SC5314	macs2	peak	2375863	2376004	ID=peak_1192	wt2_32_S51442,wt2_H2O2_30_S51455,wt3_33_S51443,wt3_H2O2_31_S51454,wt4_H2O2_39_S51445
Ca22chr1A_C_albicans_SC5314	macs2	peak	2377787	2377985	ID=peak_1193	wt2_32_S51442,wt2_H2O2_30_S51455,wt3_33_S51443,wt3_H2O2_31_S51454,wt4_38_S51444,wt4_H2O2_39_S51445
Ca22chr1A_C_albicans_SC5314	macs2	peak	2378113	2378283	ID=peak_1194	wt2_H2O2_30_S51455,wt3_H2O2_31_S51454
Ca22chr1A_C_albicans_SC5314	macs2	peak	2378451	2378616	ID=peak_1195	wt2_H2O2_30_S51455
Ca22chr1A_C_albicans_SC5314	macs2	peak	2383808	2383900	ID=peak_1196	wt4_38_S51444
Ca22chr1A_C_albicans_SC5314	macs2	peak	2384703	2384805	ID=peak_1197	wt2_32_S51442,wt2_H2O2_30_S51455,wt3_H2O2_31_S51454,wt4_H2O2_39_S51445
Ca22chr1A_C_albicans_SC5314	macs2	peak	2385424	2385585	ID=peak_1198	wt2_H2O2_30_S51455,wt3_H2O2_31_S51454
Ca22chr1A_C_albicans_SC5314	macs2	peak	2385981	2386068	ID=peak_1199	wt2_32_S51442,wt2_H2O2_30_S51455,wt3_H2O2_31_S51454
Ca22chr1A_C_albicans_SC5314	macs2	peak	2389687	2389882	ID=peak_1200	wt2_32_S51442,wt2_H2O2_30_S51455,wt3_H2O2_31_S51454
Ca22chr1A_C_albicans_SC5314	macs2	peak	2390113	2390542	ID=peak_1201	wt2_32_S51442,wt2_H2O2_30_S51455,wt3_33_S51443,wt3_H2O2_31_S51454,wt4_H2O2_39_S51445
Ca22chr1A_C_albicans_SC5314	macs2	peak	2392901	2393147	ID=peak_1202	wt3_H2O2_31_S51454
Ca22chr1A_C_albicans_SC5314	macs2	peak	2393261	2393420	ID=peak_1203	wt2_H2O2_30_S51455
Ca22chr1A_C_albicans_SC5314	macs2	peak	2395201	2395851	ID=peak_1204	wt2_32_S51442,wt2_H2O2_30_S51455,wt3_33_S51443,wt3_H2O2_31_S51454,wt4_38_S51444,wt4_H2O2_39_S51445
Ca22chr1A_C_albicans_SC5314	macs2	peak	2396484	2396570	ID=peak_1205	wt4_H2O2_39_S51445
Ca22chr1A_C_albicans_SC5314	macs2	peak	2398325	2398430	ID=peak_1206	wt2_H2O2_30_S51455
Ca22chr1A_C_albicans_SC5314	macs2	peak	2399786	2399874	ID=peak_1207	wt4_H2O2_39_S51445
Ca22chr1A_C_albicans_SC5314	macs2	peak	2401223	2402966	ID=peak_1208	wt2_32_S51442,wt2_H2O2_30_S51455,wt3_33_S51443,wt3_H2O2_31_S51454,wt4_38_S51444,wt4_H2O2_39_S51445
Ca22chr1A_C_albicans_SC5314	macs2	peak	2403278	2403383	ID=peak_1209	wt2_H2O2_30_S51455,wt3_H2O2_31_S51454
Ca22chr1A_C_albicans_SC5314	macs2	peak	2403531	2403661	ID=peak_1210	wt4_H2O2_39_S51445
Ca22chr1A_C_albicans_SC5314	macs2	peak	2403840	2403918	ID=peak_1211	wt4_38_S51444
Ca22chr1A_C_albicans_SC5314	macs2	peak	2405726	2405837	ID=peak_1212	wt2_H2O2_30_S51455
Ca22chr1A_C_albicans_SC5314	macs2	peak	2406024	2406423	ID=peak_1213	wt2_32_S51442,wt2_H2O2_30_S51455,wt3_33_S51443,wt3_H2O2_31_S51454,wt4_38_S51444,wt4_H2O2_39_S51445
Ca22chr1A_C_albicans_SC5314	macs2	peak	2407475	2407619	ID=peak_1214	wt2_32_S51442,wt2_H2O2_30_S51455
Ca22chr1A_C_albicans_SC5314	macs2	peak	2409717	2409791	ID=peak_1215	wt4_38_S51444
Ca22chr1A_C_albicans_SC5314	macs2	peak	2409993	2410324	ID=peak_1216	wt2_32_S51442,wt2_H2O2_30_S51455,wt3_33_S51443,wt3_H2O2_31_S51454,wt4_38_S51444,wt4_H2O2_39_S51445
Ca22chr1A_C_albicans_SC5314	macs2	peak	2414871	2414962	ID=peak_1217	wt4_38_S51444
Ca22chr1A_C_albicans_SC5314	macs2	peak	2415505	2415650	ID=peak_1218	wt2_32_S51442,wt2_H2O2_30_S51455,wt3_H2O2_31_S51454,wt4_H2O2_39_S51445
Ca22chr1A_C_albicans_SC5314	macs2	peak	2419414	2419518	ID=peak_1219	wt2_H2O2_30_S51455
Ca22chr1A_C_albicans_SC5314	macs2	peak	2422571	2422699	ID=peak_1220	wt2_32_S51442,wt2_H2O2_30_S51455,wt3_33_S51443,wt3_H2O2_31_S51454,wt4_38_S51444,wt4_H2O2_39_S51445
Ca22chr1A_C_albicans_SC5314	macs2	peak	2425741	2426041	ID=peak_1221	wt2_32_S51442,wt2_H2O2_30_S51455,wt3_33_S51443,wt3_H2O2_31_S51454,wt4_H2O2_39_S51445
Ca22chr1A_C_albicans_SC5314	macs2	peak	2428308	2428524	ID=peak_1222	wt2_32_S51442,wt2_H2O2_30_S51455,wt3_33_S51443,wt3_H2O2_31_S51454,wt4_38_S51444,wt4_H2O2_39_S51445
Ca22chr1A_C_albicans_SC5314	macs2	peak	2433538	2433795	ID=peak_1223	wt2_32_S51442,wt2_H2O2_30_S51455,wt3_33_S51443,wt3_H2O2_31_S51454,wt4_38_S51444,wt4_H2O2_39_S51445
Ca22chr1A_C_albicans_SC5314	macs2	peak	2434056	2434147	ID=peak_1224	wt4_38_S51444
Ca22chr1A_C_albicans_SC5314	macs2	peak	2434678	2434763	ID=peak_1225	wt4_38_S51444
Ca22chr1A_C_albicans_SC5314	macs2	peak	2436192	2436397	ID=peak_1226	wt4_38_S51444
Ca22chr1A_C_albicans_SC5314	macs2	peak	2436968	2437291	ID=peak_1227	wt2_32_S51442,wt2_H2O2_30_S51455,wt3_33_S51443,wt3_H2O2_31_S51454,wt4_38_S51444,wt4_H2O2_39_S51445
Ca22chr1A_C_albicans_SC5314	macs2	peak	2437853	2437983	ID=peak_1228	wt2_32_S51442,wt3_33_S51443,wt3_H2O2_31_S51454
Ca22chr1A_C_albicans_SC5314	macs2	peak	2440361	2441785	ID=peak_1229	wt2_32_S51442,wt2_H2O2_30_S51455,wt3_33_S51443,wt3_H2O2_31_S51454,wt4_38_S51444,wt4_H2O2_39_S51445
Ca22chr1A_C_albicans_SC5314	macs2	peak	2443176	2443417	ID=peak_1230	wt2_H2O2_30_S51455,wt3_33_S51443,wt3_H2O2_31_S51454,wt4_38_S51444,wt4_H2O2_39_S51445
Ca22chr1A_C_albicans_SC5314	macs2	peak	2444957	2445122	ID=peak_1231	wt2_32_S51442,wt2_H2O2_30_S51455,wt3_33_S51443,wt3_H2O2_31_S51454,wt4_H2O2_39_S51445
Ca22chr1A_C_albicans_SC5314	macs2	peak	2445237	2445401	ID=peak_1232	wt2_32_S51442,wt2_H2O2_30_S51455,wt3_33_S51443,wt3_H2O2_31_S51454,wt4_38_S51444,wt4_H2O2_39_S51445
Ca22chr1A_C_albicans_SC5314	macs2	peak	2446577	2446679	ID=peak_1233	wt2_32_S51442,wt2_H2O2_30_S51455,wt3_33_S51443,wt3_H2O2_31_S51454,wt4_38_S51444
Ca22chr1A_C_albicans_SC5314	macs2	peak	2447934	2448055	ID=peak_1234	wt2_32_S51442,wt2_H2O2_30_S51455
Ca22chr1A_C_albicans_SC5314	macs2	peak	2448169	2448270	ID=peak_1235	wt2_32_S51442,wt3_H2O2_31_S51454
Ca22chr1A_C_albicans_SC5314	macs2	peak	2449303	2449472	ID=peak_1236	wt2_32_S51442,wt2_H2O2_30_S51455,wt3_33_S51443,wt3_H2O2_31_S51454,wt4_H2O2_39_S51445
Ca22chr1A_C_albicans_SC5314	macs2	peak	2449753	2449840	ID=peak_1237	wt4_38_S51444
Ca22chr1A_C_albicans_SC5314	macs2	peak	2451748	2451817	ID=peak_1238	wt4_38_S51444
Ca22chr1A_C_albicans_SC5314	macs2	peak	2452669	2452847	ID=peak_1239	wt2_32_S51442,wt2_H2O2_30_S51455,wt3_33_S51443,wt3_H2O2_31_S51454,wt4_38_S51444,wt4_H2O2_39_S51445
Ca22chr1A_C_albicans_SC5314	macs2	peak	2455779	2455915	ID=peak_1240	wt3_H2O2_31_S51454
Ca22chr1A_C_albicans_SC5314	macs2	peak	2456081	2456155	ID=peak_1241	wt2_H2O2_30_S51455
Ca22chr1A_C_albicans_SC5314	macs2	peak	2456302	2456444	ID=peak_1242	wt2_H2O2_30_S51455
Ca22chr1A_C_albicans_SC5314	macs2	peak	2456548	2456723	ID=peak_1243	wt2_32_S51442,wt2_H2O2_30_S51455,wt3_33_S51443,wt3_H2O2_31_S51454,wt4_38_S51444,wt4_H2O2_39_S51445
Ca22chr1A_C_albicans_SC5314	macs2	peak	2467713	2467901	ID=peak_1244	wt2_32_S51442,wt2_H2O2_30_S51455,wt3_33_S51443,wt3_H2O2_31_S51454,wt4_H2O2_39_S51445
Ca22chr1A_C_albicans_SC5314	macs2	peak	2471547	2471653	ID=peak_1245	wt3_H2O2_31_S51454
Ca22chr1A_C_albicans_SC5314	macs2	peak	2471809	2472044	ID=peak_1246	wt2_32_S51442,wt2_H2O2_30_S51455,wt3_33_S51443,wt3_H2O2_31_S51454,wt4_38_S51444,wt4_H2O2_39_S51445
Ca22chr1A_C_albicans_SC5314	macs2	peak	2474077	2474174	ID=peak_1247	wt2_32_S51442,wt3_33_S51443
Ca22chr1A_C_albicans_SC5314	macs2	peak	2474680	2475121	ID=peak_1248	wt2_32_S51442,wt2_H2O2_30_S51455,wt3_33_S51443,wt3_H2O2_31_S51454,wt4_H2O2_39_S51445
Ca22chr1A_C_albicans_SC5314	macs2	peak	2475211	2475305	ID=peak_1249	wt2_H2O2_30_S51455
Ca22chr1A_C_albicans_SC5314	macs2	peak	2476049	2476359	ID=peak_1250	wt2_32_S51442,wt2_H2O2_30_S51455,wt3_33_S51443,wt3_H2O2_31_S51454,wt4_38_S51444,wt4_H2O2_39_S51445
Ca22chr1A_C_albicans_SC5314	macs2	peak	2477759	2477840	ID=peak_1251	wt2_32_S51442,wt3_H2O2_31_S51454
Ca22chr1A_C_albicans_SC5314	macs2	peak	2483645	2483805	ID=peak_1252	wt2_32_S51442,wt2_H2O2_30_S51455,wt3_33_S51443,wt3_H2O2_31_S51454,wt4_H2O2_39_S51445
Ca22chr1A_C_albicans_SC5314	macs2	peak	2483990	2484088	ID=peak_1253	wt2_32_S51442
Ca22chr1A_C_albicans_SC5314	macs2	peak	2484207	2484300	ID=peak_1254	wt2_32_S51442,wt3_33_S51443
Ca22chr1A_C_albicans_SC5314	macs2	peak	2484422	2484628	ID=peak_1255	wt2_32_S51442,wt2_H2O2_30_S51455,wt3_33_S51443,wt3_H2O2_31_S51454,wt4_38_S51444,wt4_H2O2_39_S51445
Ca22chr1A_C_albicans_SC5314	macs2	peak	2485625	2486309	ID=peak_1256	wt2_32_S51442,wt2_H2O2_30_S51455,wt3_33_S51443,wt3_H2O2_31_S51454,wt4_38_S51444,wt4_H2O2_39_S51445
Ca22chr1A_C_albicans_SC5314	macs2	peak	2486469	2486578	ID=peak_1257	wt4_38_S51444
Ca22chr1A_C_albicans_SC5314	macs2	peak	2487375	2487541	ID=peak_1258	wt2_32_S51442,wt2_H2O2_30_S51455,wt3_33_S51443,wt3_H2O2_31_S51454,wt4_38_S51444,wt4_H2O2_39_S51445
Ca22chr1A_C_albicans_SC5314	macs2	peak	2491285	2491944	ID=peak_1259	wt2_32_S51442,wt2_H2O2_30_S51455,wt3_33_S51443,wt3_H2O2_31_S51454,wt4_38_S51444,wt4_H2O2_39_S51445
Ca22chr1A_C_albicans_SC5314	macs2	peak	2502239	2502386	ID=peak_1260	wt2_32_S51442,wt2_H2O2_30_S51455,wt3_33_S51443,wt3_H2O2_31_S51454,wt4_H2O2_39_S51445
Ca22chr1A_C_albicans_SC5314	macs2	peak	2503876	2503980	ID=peak_1261	wt2_32_S51442,wt3_33_S51443,wt4_38_S51444
Ca22chr1A_C_albicans_SC5314	macs2	peak	2505197	2505696	ID=peak_1262	wt2_32_S51442,wt2_H2O2_30_S51455,wt3_33_S51443,wt3_H2O2_31_S51454,wt4_38_S51444,wt4_H2O2_39_S51445
Ca22chr1A_C_albicans_SC5314	macs2	peak	2511935	2512056	ID=peak_1263	wt2_32_S51442,wt2_H2O2_30_S51455,wt3_33_S51443,wt3_H2O2_31_S51454,wt4_38_S51444
Ca22chr1A_C_albicans_SC5314	macs2	peak	2512596	2512711	ID=peak_1264	wt2_32_S51442,wt2_H2O2_30_S51455,wt3_33_S51443,wt3_H2O2_31_S51454,wt4_H2O2_39_S51445
Ca22chr1A_C_albicans_SC5314	macs2	peak	2513150	2513300	ID=peak_1265	wt2_32_S51442,wt2_H2O2_30_S51455,wt3_33_S51443,wt3_H2O2_31_S51454,wt4_38_S51444,wt4_H2O2_39_S51445
Ca22chr1A_C_albicans_SC5314	macs2	peak	2513681	2513883	ID=peak_1266	wt4_38_S51444
Ca22chr1A_C_albicans_SC5314	macs2	peak	2514768	2515228	ID=peak_1267	wt2_32_S51442,wt2_H2O2_30_S51455,wt3_33_S51443,wt3_H2O2_31_S51454,wt4_38_S51444,wt4_H2O2_39_S51445
Ca22chr1A_C_albicans_SC5314	macs2	peak	2515320	2515427	ID=peak_1268	wt2_32_S51442,wt2_H2O2_30_S51455,wt3_33_S51443,wt3_H2O2_31_S51454
Ca22chr1A_C_albicans_SC5314	macs2	peak	2515893	2516215	ID=peak_1269	wt2_32_S51442,wt2_H2O2_30_S51455,wt3_33_S51443,wt3_H2O2_31_S51454,wt4_H2O2_39_S51445
Ca22chr1A_C_albicans_SC5314	macs2	peak	2516962	2517066	ID=peak_1270	wt2_32_S51442,wt2_H2O2_30_S51455,wt3_33_S51443,wt3_H2O2_31_S51454,wt4_38_S51444,wt4_H2O2_39_S51445
Ca22chr1A_C_albicans_SC5314	macs2	peak	2518239	2518318	ID=peak_1271	wt2_32_S51442
Ca22chr1A_C_albicans_SC5314	macs2	peak	2518527	2518653	ID=peak_1272	wt2_32_S51442,wt2_H2O2_30_S51455,wt3_33_S51443,wt3_H2O2_31_S51454,wt4_38_S51444
Ca22chr1A_C_albicans_SC5314	macs2	peak	2518786	2520201	ID=peak_1273	wt2_32_S51442,wt2_H2O2_30_S51455,wt3_33_S51443,wt3_H2O2_31_S51454,wt4_38_S51444,wt4_H2O2_39_S51445
Ca22chr1A_C_albicans_SC5314	macs2	peak	2521452	2521549	ID=peak_1274	wt4_38_S51444
Ca22chr1A_C_albicans_SC5314	macs2	peak	2521595	2521672	ID=peak_1275	wt3_33_S51443
Ca22chr1A_C_albicans_SC5314	macs2	peak	2521793	2521892	ID=peak_1276	wt2_32_S51442,wt2_H2O2_30_S51455,wt3_33_S51443
Ca22chr1A_C_albicans_SC5314	macs2	peak	2522698	2522772	ID=peak_1277	wt4_38_S51444
Ca22chr1A_C_albicans_SC5314	macs2	peak	2524349	2524467	ID=peak_1278	wt4_38_S51444
Ca22chr1A_C_albicans_SC5314	macs2	peak	2527404	2527541	ID=peak_1279	wt2_32_S51442,wt2_H2O2_30_S51455,wt3_33_S51443,wt3_H2O2_31_S51454,wt4_H2O2_39_S51445
Ca22chr1A_C_albicans_SC5314	macs2	peak	2529319	2529396	ID=peak_1280	wt2_32_S51442,wt3_33_S51443
Ca22chr1A_C_albicans_SC5314	macs2	peak	2531397	2531470	ID=peak_1281	wt4_H2O2_39_S51445
Ca22chr1A_C_albicans_SC5314	macs2	peak	2531904	2532516	ID=peak_1282	wt2_32_S51442,wt2_H2O2_30_S51455,wt3_33_S51443,wt3_H2O2_31_S51454,wt4_38_S51444,wt4_H2O2_39_S51445
Ca22chr1A_C_albicans_SC5314	macs2	peak	2533618	2533812	ID=peak_1283	wt2_32_S51442,wt2_H2O2_30_S51455,wt3_33_S51443,wt3_H2O2_31_S51454,wt4_H2O2_39_S51445
Ca22chr1A_C_albicans_SC5314	macs2	peak	2538154	2538393	ID=peak_1284	wt2_32_S51442,wt2_H2O2_30_S51455,wt3_33_S51443,wt3_H2O2_31_S51454,wt4_38_S51444,wt4_H2O2_39_S51445
Ca22chr1A_C_albicans_SC5314	macs2	peak	2540914	2541289	ID=peak_1285	wt2_32_S51442,wt2_H2O2_30_S51455,wt3_H2O2_31_S51454,wt4_H2O2_39_S51445
Ca22chr1A_C_albicans_SC5314	macs2	peak	2541566	2541968	ID=peak_1286	wt2_32_S51442,wt2_H2O2_30_S51455,wt3_33_S51443,wt3_H2O2_31_S51454
Ca22chr1A_C_albicans_SC5314	macs2	peak	2549946	2550124	ID=peak_1287	wt2_32_S51442,wt2_H2O2_30_S51455,wt3_33_S51443,wt3_H2O2_31_S51454
Ca22chr1A_C_albicans_SC5314	macs2	peak	2553503	2553584	ID=peak_1288	wt2_32_S51442,wt3_33_S51443,wt3_H2O2_31_S51454
Ca22chr1A_C_albicans_SC5314	macs2	peak	2553879	2554071	ID=peak_1289	wt2_32_S51442,wt2_H2O2_30_S51455,wt3_33_S51443,wt3_H2O2_31_S51454,wt4_H2O2_39_S51445
Ca22chr1A_C_albicans_SC5314	macs2	peak	2554817	2555638	ID=peak_1290	wt2_32_S51442,wt2_H2O2_30_S51455,wt3_33_S51443,wt3_H2O2_31_S51454,wt4_H2O2_39_S51445
Ca22chr1A_C_albicans_SC5314	macs2	peak	2557278	2557459	ID=peak_1291	wt2_H2O2_30_S51455,wt3_H2O2_31_S51454
Ca22chr1A_C_albicans_SC5314	macs2	peak	2557577	2558113	ID=peak_1292	wt2_32_S51442,wt2_H2O2_30_S51455,wt3_33_S51443,wt3_H2O2_31_S51454,wt4_38_S51444,wt4_H2O2_39_S51445
Ca22chr1A_C_albicans_SC5314	macs2	peak	2559769	2560147	ID=peak_1293	wt2_32_S51442,wt2_H2O2_30_S51455,wt3_33_S51443,wt3_H2O2_31_S51454,wt4_38_S51444,wt4_H2O2_39_S51445
Ca22chr1A_C_albicans_SC5314	macs2	peak	2560263	2560489	ID=peak_1294	wt2_32_S51442,wt2_H2O2_30_S51455,wt3_33_S51443,wt3_H2O2_31_S51454
Ca22chr1A_C_albicans_SC5314	macs2	peak	2560633	2560963	ID=peak_1295	wt2_32_S51442,wt2_H2O2_30_S51455,wt3_33_S51443,wt3_H2O2_31_S51454,wt4_H2O2_39_S51445
Ca22chr1A_C_albicans_SC5314	macs2	peak	2561670	2561770	ID=peak_1296	wt2_H2O2_30_S51455
Ca22chr1A_C_albicans_SC5314	macs2	peak	2561885	2562012	ID=peak_1297	wt3_H2O2_31_S51454,wt4_H2O2_39_S51445
Ca22chr1A_C_albicans_SC5314	macs2	peak	2562154	2562375	ID=peak_1298	wt2_H2O2_30_S51455,wt3_H2O2_31_S51454
Ca22chr1A_C_albicans_SC5314	macs2	peak	2562711	2562779	ID=peak_1299	wt2_H2O2_30_S51455
Ca22chr1A_C_albicans_SC5314	macs2	peak	2563638	2563975	ID=peak_1300	wt2_32_S51442,wt2_H2O2_30_S51455,wt3_33_S51443,wt3_H2O2_31_S51454,wt4_H2O2_39_S51445
Ca22chr1A_C_albicans_SC5314	macs2	peak	2567120	2567396	ID=peak_1301	wt2_32_S51442,wt2_H2O2_30_S51455,wt3_33_S51443,wt3_H2O2_31_S51454,wt4_H2O2_39_S51445
Ca22chr1A_C_albicans_SC5314	macs2	peak	2567653	2567842	ID=peak_1302	wt2_32_S51442,wt2_H2O2_30_S51455,wt3_33_S51443,wt3_H2O2_31_S51454,wt4_38_S51444,wt4_H2O2_39_S51445
Ca22chr1A_C_albicans_SC5314	macs2	peak	2573841	2574125	ID=peak_1303	wt2_32_S51442,wt2_H2O2_30_S51455,wt3_33_S51443,wt3_H2O2_31_S51454,wt4_38_S51444,wt4_H2O2_39_S51445
Ca22chr1A_C_albicans_SC5314	macs2	peak	2574230	2574368	ID=peak_1304	wt2_32_S51442,wt2_H2O2_30_S51455,wt3_33_S51443,wt3_H2O2_31_S51454
Ca22chr1A_C_albicans_SC5314	macs2	peak	2577482	2577632	ID=peak_1305	wt2_32_S51442,wt2_H2O2_30_S51455,wt3_33_S51443,wt3_H2O2_31_S51454,wt4_H2O2_39_S51445
Ca22chr1A_C_albicans_SC5314	macs2	peak	2581506	2581646	ID=peak_1306	wt2_32_S51442
Ca22chr1A_C_albicans_SC5314	macs2	peak	2581770	2582681	ID=peak_1307	wt2_32_S51442,wt2_H2O2_30_S51455,wt3_33_S51443,wt3_H2O2_31_S51454,wt4_38_S51444,wt4_H2O2_39_S51445
Ca22chr1A_C_albicans_SC5314	macs2	peak	2582833	2583000	ID=peak_1308	wt2_32_S51442,wt2_H2O2_30_S51455,wt3_33_S51443,wt3_H2O2_31_S51454
Ca22chr1A_C_albicans_SC5314	macs2	peak	2583149	2583282	ID=peak_1309	wt2_32_S51442,wt3_H2O2_31_S51454
Ca22chr1A_C_albicans_SC5314	macs2	peak	2583338	2583578	ID=peak_1310	wt2_32_S51442,wt2_H2O2_30_S51455,wt3_33_S51443,wt3_H2O2_31_S51454,wt4_38_S51444,wt4_H2O2_39_S51445
Ca22chr1A_C_albicans_SC5314	macs2	peak	2583852	2583999	ID=peak_1311	wt2_32_S51442,wt2_H2O2_30_S51455,wt3_33_S51443,wt3_H2O2_31_S51454,wt4_H2O2_39_S51445
Ca22chr1A_C_albicans_SC5314	macs2	peak	2585291	2585453	ID=peak_1312	wt2_32_S51442,wt2_H2O2_30_S51455,wt3_33_S51443,wt3_H2O2_31_S51454,wt4_38_S51444,wt4_H2O2_39_S51445
Ca22chr1A_C_albicans_SC5314	macs2	peak	2588552	2589539	ID=peak_1313	wt2_32_S51442,wt2_H2O2_30_S51455,wt3_33_S51443,wt3_H2O2_31_S51454,wt4_38_S51444,wt4_H2O2_39_S51445
Ca22chr1A_C_albicans_SC5314	macs2	peak	2590133	2590609	ID=peak_1314	wt2_32_S51442,wt2_H2O2_30_S51455,wt3_H2O2_31_S51454,wt4_38_S51444,wt4_H2O2_39_S51445
Ca22chr1A_C_albicans_SC5314	macs2	peak	2591136	2592165	ID=peak_1315	wt2_32_S51442,wt2_H2O2_30_S51455,wt3_33_S51443,wt3_H2O2_31_S51454,wt4_38_S51444,wt4_H2O2_39_S51445
Ca22chr1A_C_albicans_SC5314	macs2	peak	2592428	2592513	ID=peak_1316	wt3_33_S51443
Ca22chr1A_C_albicans_SC5314	macs2	peak	2592658	2593048	ID=peak_1317	wt2_32_S51442,wt2_H2O2_30_S51455,wt3_33_S51443,wt3_H2O2_31_S51454,wt4_38_S51444,wt4_H2O2_39_S51445
Ca22chr1A_C_albicans_SC5314	macs2	peak	2593156	2593368	ID=peak_1318	wt2_H2O2_30_S51455,wt3_H2O2_31_S51454
Ca22chr1A_C_albicans_SC5314	macs2	peak	2593510	2593599	ID=peak_1319	wt2_H2O2_30_S51455,wt3_H2O2_31_S51454
Ca22chr1A_C_albicans_SC5314	macs2	peak	2593719	2594949	ID=peak_1320	wt2_32_S51442,wt2_H2O2_30_S51455,wt3_33_S51443,wt3_H2O2_31_S51454,wt4_38_S51444,wt4_H2O2_39_S51445
Ca22chr1A_C_albicans_SC5314	macs2	peak	2599006	2599454	ID=peak_1321	wt2_32_S51442,wt2_H2O2_30_S51455,wt3_33_S51443,wt3_H2O2_31_S51454,wt4_38_S51444,wt4_H2O2_39_S51445
Ca22chr1A_C_albicans_SC5314	macs2	peak	2599612	2599949	ID=peak_1322	wt2_32_S51442,wt2_H2O2_30_S51455,wt3_33_S51443,wt3_H2O2_31_S51454,wt4_38_S51444,wt4_H2O2_39_S51445
Ca22chr1A_C_albicans_SC5314	macs2	peak	2600022	2600097	ID=peak_1323	wt2_32_S51442
Ca22chr1A_C_albicans_SC5314	macs2	peak	2601893	2602103	ID=peak_1324	wt2_32_S51442,wt2_H2O2_30_S51455
Ca22chr1A_C_albicans_SC5314	macs2	peak	2602822	2602961	ID=peak_1325	wt2_32_S51442,wt2_H2O2_30_S51455,wt3_33_S51443,wt3_H2O2_31_S51454,wt4_38_S51444,wt4_H2O2_39_S51445
Ca22chr1A_C_albicans_SC5314	macs2	peak	2607122	2607211	ID=peak_1326	wt2_H2O2_30_S51455
Ca22chr1A_C_albicans_SC5314	macs2	peak	2609221	2609430	ID=peak_1327	wt2_32_S51442,wt2_H2O2_30_S51455,wt3_33_S51443,wt3_H2O2_31_S51454
Ca22chr1A_C_albicans_SC5314	macs2	peak	2609453	2609728	ID=peak_1328	wt2_32_S51442,wt2_H2O2_30_S51455,wt3_33_S51443,wt3_H2O2_31_S51454,wt4_38_S51444,wt4_H2O2_39_S51445
Ca22chr1A_C_albicans_SC5314	macs2	peak	2610363	2610530	ID=peak_1329	wt2_32_S51442
Ca22chr1A_C_albicans_SC5314	macs2	peak	2616592	2616801	ID=peak_1330	wt2_32_S51442,wt2_H2O2_30_S51455,wt3_33_S51443,wt3_H2O2_31_S51454,wt4_38_S51444,wt4_H2O2_39_S51445
Ca22chr1A_C_albicans_SC5314	macs2	peak	2618649	2618796	ID=peak_1331	wt2_32_S51442,wt2_H2O2_30_S51455,wt3_33_S51443,wt3_H2O2_31_S51454
Ca22chr1A_C_albicans_SC5314	macs2	peak	2620611	2620687	ID=peak_1332	wt2_H2O2_30_S51455
Ca22chr1A_C_albicans_SC5314	macs2	peak	2621958	2622146	ID=peak_1333	wt2_32_S51442,wt2_H2O2_30_S51455,wt3_H2O2_31_S51454
Ca22chr1A_C_albicans_SC5314	macs2	peak	2622326	2622449	ID=peak_1334	wt2_32_S51442,wt2_H2O2_30_S51455,wt3_33_S51443,wt3_H2O2_31_S51454,wt4_38_S51444
Ca22chr1A_C_albicans_SC5314	macs2	peak	2622621	2622909	ID=peak_1335	wt2_32_S51442,wt2_H2O2_30_S51455,wt3_33_S51443,wt3_H2O2_31_S51454,wt4_38_S51444,wt4_H2O2_39_S51445
Ca22chr1A_C_albicans_SC5314	macs2	peak	2623112	2623476	ID=peak_1336	wt2_32_S51442,wt2_H2O2_30_S51455,wt3_33_S51443,wt3_H2O2_31_S51454
Ca22chr1A_C_albicans_SC5314	macs2	peak	2629611	2629793	ID=peak_1337	wt2_32_S51442,wt3_33_S51443
Ca22chr1A_C_albicans_SC5314	macs2	peak	2630195	2630329	ID=peak_1338	wt2_32_S51442,wt2_H2O2_30_S51455
Ca22chr1A_C_albicans_SC5314	macs2	peak	2630436	2630542	ID=peak_1339	wt2_32_S51442
Ca22chr1A_C_albicans_SC5314	macs2	peak	2631174	2631296	ID=peak_1340	wt3_33_S51443
Ca22chr1A_C_albicans_SC5314	macs2	peak	2632009	2632092	ID=peak_1341	wt2_H2O2_30_S51455
Ca22chr1A_C_albicans_SC5314	macs2	peak	2632314	2632450	ID=peak_1342	wt2_H2O2_30_S51455,wt3_H2O2_31_S51454
Ca22chr1A_C_albicans_SC5314	macs2	peak	2632645	2632746	ID=peak_1343	wt2_32_S51442,wt2_H2O2_30_S51455,wt3_33_S51443,wt3_H2O2_31_S51454
Ca22chr1A_C_albicans_SC5314	macs2	peak	2634963	2635139	ID=peak_1344	wt2_32_S51442,wt2_H2O2_30_S51455,wt3_33_S51443,wt3_H2O2_31_S51454
Ca22chr1A_C_albicans_SC5314	macs2	peak	2637878	2638175	ID=peak_1345	wt2_H2O2_30_S51455,wt3_H2O2_31_S51454,wt4_H2O2_39_S51445
Ca22chr1A_C_albicans_SC5314	macs2	peak	2640966	2641069	ID=peak_1346	wt2_H2O2_30_S51455
Ca22chr1A_C_albicans_SC5314	macs2	peak	2641141	2641259	ID=peak_1347	wt2_H2O2_30_S51455
Ca22chr1A_C_albicans_SC5314	macs2	peak	2641485	2641699	ID=peak_1348	wt2_32_S51442,wt2_H2O2_30_S51455,wt3_33_S51443,wt3_H2O2_31_S51454,wt4_38_S51444,wt4_H2O2_39_S51445
Ca22chr1A_C_albicans_SC5314	macs2	peak	2647419	2647604	ID=peak_1349	wt2_32_S51442,wt2_H2O2_30_S51455,wt3_33_S51443,wt3_H2O2_31_S51454,wt4_38_S51444,wt4_H2O2_39_S51445
Ca22chr1A_C_albicans_SC5314	macs2	peak	2648173	2648310	ID=peak_1350	wt2_32_S51442,wt2_H2O2_30_S51455,wt3_33_S51443,wt3_H2O2_31_S51454,wt4_38_S51444,wt4_H2O2_39_S51445
Ca22chr1A_C_albicans_SC5314	macs2	peak	2653336	2653518	ID=peak_1351	wt2_32_S51442,wt2_H2O2_30_S51455,wt3_33_S51443,wt3_H2O2_31_S51454,wt4_H2O2_39_S51445
Ca22chr1A_C_albicans_SC5314	macs2	peak	2655114	2655280	ID=peak_1352	wt2_32_S51442,wt2_H2O2_30_S51455,wt3_33_S51443,wt3_H2O2_31_S51454,wt4_H2O2_39_S51445
Ca22chr1A_C_albicans_SC5314	macs2	peak	2657382	2657453	ID=peak_1353	wt2_H2O2_30_S51455
Ca22chr1A_C_albicans_SC5314	macs2	peak	2661423	2661526	ID=peak_1354	wt2_32_S51442,wt2_H2O2_30_S51455
Ca22chr1A_C_albicans_SC5314	macs2	peak	2664659	2664802	ID=peak_1355	wt4_H2O2_39_S51445
Ca22chr1A_C_albicans_SC5314	macs2	peak	2666570	2666644	ID=peak_1356	wt2_32_S51442
Ca22chr1A_C_albicans_SC5314	macs2	peak	2668390	2668516	ID=peak_1357	wt2_H2O2_30_S51455,wt3_H2O2_31_S51454
Ca22chr1A_C_albicans_SC5314	macs2	peak	2668775	2669004	ID=peak_1358	wt2_32_S51442,wt2_H2O2_30_S51455,wt3_33_S51443,wt3_H2O2_31_S51454,wt4_38_S51444,wt4_H2O2_39_S51445
Ca22chr1A_C_albicans_SC5314	macs2	peak	2676637	2676967	ID=peak_1359	wt2_H2O2_30_S51455,wt3_H2O2_31_S51454
Ca22chr1A_C_albicans_SC5314	macs2	peak	2677321	2677412	ID=peak_1360	wt3_33_S51443
Ca22chr1A_C_albicans_SC5314	macs2	peak	2680108	2680273	ID=peak_1361	wt2_32_S51442,wt2_H2O2_30_S51455,wt3_33_S51443,wt3_H2O2_31_S51454,wt4_38_S51444,wt4_H2O2_39_S51445
Ca22chr1A_C_albicans_SC5314	macs2	peak	2682911	2683157	ID=peak_1362	wt2_32_S51442,wt2_H2O2_30_S51455,wt3_33_S51443,wt3_H2O2_31_S51454,wt4_38_S51444,wt4_H2O2_39_S51445
Ca22chr1A_C_albicans_SC5314	macs2	peak	2686569	2686731	ID=peak_1363	wt2_32_S51442,wt2_H2O2_30_S51455,wt3_33_S51443,wt3_H2O2_31_S51454
Ca22chr1A_C_albicans_SC5314	macs2	peak	2687550	2687626	ID=peak_1364	wt2_H2O2_30_S51455
Ca22chr1A_C_albicans_SC5314	macs2	peak	2690288	2690372	ID=peak_1365	wt2_32_S51442,wt3_H2O2_31_S51454
Ca22chr1A_C_albicans_SC5314	macs2	peak	2690537	2690678	ID=peak_1366	wt2_32_S51442,wt2_H2O2_30_S51455,wt3_33_S51443,wt3_H2O2_31_S51454,wt4_38_S51444,wt4_H2O2_39_S51445
Ca22chr1A_C_albicans_SC5314	macs2	peak	2694606	2695155	ID=peak_1367	wt2_32_S51442,wt2_H2O2_30_S51455,wt3_33_S51443,wt3_H2O2_31_S51454,wt4_H2O2_39_S51445
Ca22chr1A_C_albicans_SC5314	macs2	peak	2697848	2697937	ID=peak_1368	wt2_H2O2_30_S51455,wt3_33_S51443
Ca22chr1A_C_albicans_SC5314	macs2	peak	2699053	2699466	ID=peak_1369	wt2_32_S51442,wt2_H2O2_30_S51455,wt3_33_S51443,wt3_H2O2_31_S51454,wt4_38_S51444,wt4_H2O2_39_S51445
Ca22chr1A_C_albicans_SC5314	macs2	peak	2703374	2703607	ID=peak_1370	wt2_32_S51442,wt2_H2O2_30_S51455,wt3_33_S51443,wt3_H2O2_31_S51454,wt4_38_S51444,wt4_H2O2_39_S51445
Ca22chr1A_C_albicans_SC5314	macs2	peak	2704147	2704263	ID=peak_1371	wt2_32_S51442,wt2_H2O2_30_S51455,wt3_33_S51443,wt3_H2O2_31_S51454
Ca22chr1A_C_albicans_SC5314	macs2	peak	2707509	2707717	ID=peak_1372	wt2_32_S51442,wt2_H2O2_30_S51455,wt3_33_S51443,wt3_H2O2_31_S51454,wt4_38_S51444,wt4_H2O2_39_S51445
Ca22chr1A_C_albicans_SC5314	macs2	peak	2717315	2717586	ID=peak_1373	wt2_32_S51442,wt2_H2O2_30_S51455,wt3_33_S51443,wt3_H2O2_31_S51454,wt4_38_S51444,wt4_H2O2_39_S51445
Ca22chr1A_C_albicans_SC5314	macs2	peak	2717739	2718058	ID=peak_1374	wt2_32_S51442,wt2_H2O2_30_S51455,wt3_33_S51443,wt3_H2O2_31_S51454,wt4_H2O2_39_S51445
Ca22chr1A_C_albicans_SC5314	macs2	peak	2718316	2718388	ID=peak_1375	wt2_H2O2_30_S51455
Ca22chr1A_C_albicans_SC5314	macs2	peak	2718390	2718799	ID=peak_1376	wt2_32_S51442,wt2_H2O2_30_S51455,wt3_H2O2_31_S51454,wt4_H2O2_39_S51445
Ca22chr1A_C_albicans_SC5314	macs2	peak	2719064	2719206	ID=peak_1377	wt2_H2O2_30_S51455,wt3_H2O2_31_S51454,wt4_H2O2_39_S51445
Ca22chr1A_C_albicans_SC5314	macs2	peak	2719417	2719656	ID=peak_1378	wt2_H2O2_30_S51455,wt3_H2O2_31_S51454
Ca22chr1A_C_albicans_SC5314	macs2	peak	2721683	2721807	ID=peak_1379	wt2_H2O2_30_S51455
Ca22chr1A_C_albicans_SC5314	macs2	peak	2721934	2722064	ID=peak_1380	wt2_32_S51442,wt2_H2O2_30_S51455,wt3_33_S51443
Ca22chr1A_C_albicans_SC5314	macs2	peak	2727230	2727569	ID=peak_1381	wt2_32_S51442,wt2_H2O2_30_S51455,wt3_33_S51443,wt3_H2O2_31_S51454,wt4_38_S51444,wt4_H2O2_39_S51445
Ca22chr1A_C_albicans_SC5314	macs2	peak	2727958	2728025	ID=peak_1382	wt4_38_S51444
Ca22chr1A_C_albicans_SC5314	macs2	peak	2728101	2728249	ID=peak_1383	wt2_32_S51442
Ca22chr1A_C_albicans_SC5314	macs2	peak	2728327	2728518	ID=peak_1384	wt2_32_S51442,wt2_H2O2_30_S51455,wt3_33_S51443,wt3_H2O2_31_S51454,wt4_38_S51444
Ca22chr1A_C_albicans_SC5314	macs2	peak	2728646	2729023	ID=peak_1385	wt2_32_S51442,wt2_H2O2_30_S51455,wt3_33_S51443,wt3_H2O2_31_S51454,wt4_38_S51444,wt4_H2O2_39_S51445
Ca22chr1A_C_albicans_SC5314	macs2	peak	2733787	2733909	ID=peak_1386	wt2_32_S51442,wt2_H2O2_30_S51455,wt3_33_S51443,wt3_H2O2_31_S51454
Ca22chr1A_C_albicans_SC5314	macs2	peak	2737971	2738126	ID=peak_1387	wt2_32_S51442,wt2_H2O2_30_S51455,wt3_33_S51443,wt3_H2O2_31_S51454
Ca22chr1A_C_albicans_SC5314	macs2	peak	2744557	2744650	ID=peak_1388	wt2_32_S51442,wt2_H2O2_30_S51455,wt3_33_S51443,wt3_H2O2_31_S51454
Ca22chr1A_C_albicans_SC5314	macs2	peak	2746445	2746694	ID=peak_1389	wt2_32_S51442,wt2_H2O2_30_S51455,wt3_33_S51443,wt3_H2O2_31_S51454,wt4_38_S51444,wt4_H2O2_39_S51445
Ca22chr1A_C_albicans_SC5314	macs2	peak	2749350	2749524	ID=peak_1390	wt2_32_S51442,wt2_H2O2_30_S51455,wt3_33_S51443,wt3_H2O2_31_S51454,wt4_38_S51444,wt4_H2O2_39_S51445
Ca22chr1A_C_albicans_SC5314	macs2	peak	2751343	2751623	ID=peak_1391	wt2_32_S51442,wt2_H2O2_30_S51455,wt3_33_S51443,wt3_H2O2_31_S51454,wt4_38_S51444,wt4_H2O2_39_S51445
Ca22chr1A_C_albicans_SC5314	macs2	peak	2751759	2752037	ID=peak_1392	wt2_32_S51442,wt2_H2O2_30_S51455,wt3_33_S51443,wt4_38_S51444
Ca22chr1A_C_albicans_SC5314	macs2	peak	2752146	2752247	ID=peak_1393	wt2_32_S51442
Ca22chr1A_C_albicans_SC5314	macs2	peak	2759291	2759515	ID=peak_1394	wt2_32_S51442,wt2_H2O2_30_S51455,wt3_33_S51443,wt3_H2O2_31_S51454,wt4_38_S51444
Ca22chr1A_C_albicans_SC5314	macs2	peak	2764479	2764574	ID=peak_1395	wt2_32_S51442,wt2_H2O2_30_S51455
Ca22chr1A_C_albicans_SC5314	macs2	peak	2766962	2767067	ID=peak_1396	wt2_32_S51442,wt3_33_S51443,wt3_H2O2_31_S51454
Ca22chr1A_C_albicans_SC5314	macs2	peak	2767236	2767325	ID=peak_1397	wt2_H2O2_30_S51455,wt3_H2O2_31_S51454
Ca22chr1A_C_albicans_SC5314	macs2	peak	2771871	2771998	ID=peak_1398	wt2_32_S51442,wt2_H2O2_30_S51455,wt3_33_S51443,wt3_H2O2_31_S51454
Ca22chr1A_C_albicans_SC5314	macs2	peak	2773808	2773903	ID=peak_1399	wt2_32_S51442,wt2_H2O2_30_S51455,wt3_33_S51443
Ca22chr1A_C_albicans_SC5314	macs2	peak	2774070	2774242	ID=peak_1400	wt2_32_S51442,wt2_H2O2_30_S51455,wt3_H2O2_31_S51454
Ca22chr1A_C_albicans_SC5314	macs2	peak	2774364	2774460	ID=peak_1401	wt2_32_S51442,wt2_H2O2_30_S51455,wt3_33_S51443,wt3_H2O2_31_S51454
Ca22chr1A_C_albicans_SC5314	macs2	peak	2775905	2776293	ID=peak_1402	wt2_32_S51442,wt2_H2O2_30_S51455,wt3_33_S51443,wt3_H2O2_31_S51454,wt4_38_S51444,wt4_H2O2_39_S51445
Ca22chr1A_C_albicans_SC5314	macs2	peak	2782230	2782334	ID=peak_1403	wt2_32_S51442,wt2_H2O2_30_S51455
Ca22chr1A_C_albicans_SC5314	macs2	peak	2785224	2785413	ID=peak_1404	wt2_32_S51442,wt2_H2O2_30_S51455,wt3_33_S51443,wt3_H2O2_31_S51454,wt4_38_S51444,wt4_H2O2_39_S51445
Ca22chr1A_C_albicans_SC5314	macs2	peak	2788362	2788959	ID=peak_1405	wt2_32_S51442,wt2_H2O2_30_S51455,wt3_33_S51443,wt3_H2O2_31_S51454,wt4_38_S51444,wt4_H2O2_39_S51445
Ca22chr1A_C_albicans_SC5314	macs2	peak	2789082	2789341	ID=peak_1406	wt2_32_S51442,wt2_H2O2_30_S51455,wt3_33_S51443,wt3_H2O2_31_S51454,wt4_38_S51444,wt4_H2O2_39_S51445
Ca22chr1A_C_albicans_SC5314	macs2	peak	2792429	2792584	ID=peak_1407	wt2_32_S51442,wt2_H2O2_30_S51455,wt3_33_S51443,wt3_H2O2_31_S51454
Ca22chr1A_C_albicans_SC5314	macs2	peak	2796536	2796624	ID=peak_1408	wt2_32_S51442
Ca22chr1A_C_albicans_SC5314	macs2	peak	2796781	2796932	ID=peak_1409	wt2_32_S51442,wt2_H2O2_30_S51455,wt3_33_S51443,wt3_H2O2_31_S51454
Ca22chr1A_C_albicans_SC5314	macs2	peak	2798957	2799367	ID=peak_1410	wt2_32_S51442,wt2_H2O2_30_S51455,wt3_33_S51443,wt3_H2O2_31_S51454,wt4_38_S51444,wt4_H2O2_39_S51445
Ca22chr1A_C_albicans_SC5314	macs2	peak	2800787	2800991	ID=peak_1411	wt2_32_S51442,wt2_H2O2_30_S51455,wt3_33_S51443,wt3_H2O2_31_S51454,wt4_38_S51444,wt4_H2O2_39_S51445
Ca22chr1A_C_albicans_SC5314	macs2	peak	2805047	2805157	ID=peak_1412	wt2_32_S51442,wt2_H2O2_30_S51455,wt3_33_S51443,wt3_H2O2_31_S51454,wt4_38_S51444
Ca22chr1A_C_albicans_SC5314	macs2	peak	2809797	2809949	ID=peak_1413	wt2_32_S51442,wt2_H2O2_30_S51455,wt3_33_S51443,wt3_H2O2_31_S51454,wt4_38_S51444,wt4_H2O2_39_S51445
Ca22chr1A_C_albicans_SC5314	macs2	peak	2810321	2810565	ID=peak_1414	wt2_H2O2_30_S51455,wt3_H2O2_31_S51454
Ca22chr1A_C_albicans_SC5314	macs2	peak	2810687	2811721	ID=peak_1415	wt2_32_S51442,wt2_H2O2_30_S51455,wt3_33_S51443,wt3_H2O2_31_S51454,wt4_38_S51444,wt4_H2O2_39_S51445
Ca22chr1A_C_albicans_SC5314	macs2	peak	2812181	2812304	ID=peak_1416	wt2_32_S51442,wt2_H2O2_30_S51455,wt3_H2O2_31_S51454
Ca22chr1A_C_albicans_SC5314	macs2	peak	2825282	2825380	ID=peak_1417	wt2_32_S51442,wt2_H2O2_30_S51455,wt3_33_S51443,wt3_H2O2_31_S51454,wt4_H2O2_39_S51445
Ca22chr1A_C_albicans_SC5314	macs2	peak	2825677	2825884	ID=peak_1418	wt2_32_S51442,wt2_H2O2_30_S51455,wt3_33_S51443,wt3_H2O2_31_S51454,wt4_38_S51444,wt4_H2O2_39_S51445
Ca22chr1A_C_albicans_SC5314	macs2	peak	2826834	2826951	ID=peak_1419	wt2_32_S51442,wt2_H2O2_30_S51455,wt3_33_S51443,wt3_H2O2_31_S51454
Ca22chr1A_C_albicans_SC5314	macs2	peak	2829758	2829870	ID=peak_1420	wt2_32_S51442,wt2_H2O2_30_S51455,wt3_33_S51443,wt3_H2O2_31_S51454
Ca22chr1A_C_albicans_SC5314	macs2	peak	2830434	2830544	ID=peak_1421	wt2_32_S51442,wt3_33_S51443
Ca22chr1A_C_albicans_SC5314	macs2	peak	2831491	2831764	ID=peak_1422	wt2_32_S51442,wt2_H2O2_30_S51455,wt3_33_S51443,wt3_H2O2_31_S51454,wt4_H2O2_39_S51445
Ca22chr1A_C_albicans_SC5314	macs2	peak	2838775	2838916	ID=peak_1423	wt2_32_S51442,wt2_H2O2_30_S51455,wt3_33_S51443,wt3_H2O2_31_S51454
Ca22chr1A_C_albicans_SC5314	macs2	peak	2839382	2839720	ID=peak_1424	wt2_32_S51442,wt2_H2O2_30_S51455,wt3_33_S51443,wt3_H2O2_31_S51454,wt4_38_S51444,wt4_H2O2_39_S51445
Ca22chr1A_C_albicans_SC5314	macs2	peak	2844977	2845116	ID=peak_1425	wt2_32_S51442,wt2_H2O2_30_S51455,wt3_33_S51443,wt3_H2O2_31_S51454
Ca22chr1A_C_albicans_SC5314	macs2	peak	2845282	2845472	ID=peak_1426	wt2_32_S51442,wt2_H2O2_30_S51455,wt3_33_S51443,wt3_H2O2_31_S51454,wt4_38_S51444,wt4_H2O2_39_S51445
Ca22chr1A_C_albicans_SC5314	macs2	peak	2845829	2845952	ID=peak_1427	wt2_32_S51442,wt2_H2O2_30_S51455,wt3_H2O2_31_S51454
Ca22chr1A_C_albicans_SC5314	macs2	peak	2846135	2846368	ID=peak_1428	wt2_32_S51442,wt2_H2O2_30_S51455,wt3_33_S51443,wt3_H2O2_31_S51454,wt4_38_S51444,wt4_H2O2_39_S51445
Ca22chr1A_C_albicans_SC5314	macs2	peak	2850521	2850847	ID=peak_1429	wt2_32_S51442,wt2_H2O2_30_S51455,wt3_H2O2_31_S51454
Ca22chr1A_C_albicans_SC5314	macs2	peak	2851386	2851531	ID=peak_1430	wt2_32_S51442,wt2_H2O2_30_S51455,wt3_33_S51443,wt3_H2O2_31_S51454,wt4_38_S51444,wt4_H2O2_39_S51445
Ca22chr1A_C_albicans_SC5314	macs2	peak	2852060	2852139	ID=peak_1431	wt2_H2O2_30_S51455
Ca22chr1A_C_albicans_SC5314	macs2	peak	2852467	2852627	ID=peak_1432	wt2_32_S51442,wt2_H2O2_30_S51455,wt3_33_S51443,wt3_H2O2_31_S51454
Ca22chr1A_C_albicans_SC5314	macs2	peak	2852908	2853212	ID=peak_1433	wt2_32_S51442,wt2_H2O2_30_S51455,wt3_33_S51443,wt3_H2O2_31_S51454,wt4_38_S51444,wt4_H2O2_39_S51445
Ca22chr1A_C_albicans_SC5314	macs2	peak	2853840	2854281	ID=peak_1434	wt2_32_S51442,wt2_H2O2_30_S51455,wt3_H2O2_31_S51454,wt4_H2O2_39_S51445
Ca22chr1A_C_albicans_SC5314	macs2	peak	2855835	2855972	ID=peak_1435	wt2_32_S51442,wt2_H2O2_30_S51455
Ca22chr1A_C_albicans_SC5314	macs2	peak	2860424	2860695	ID=peak_1436	wt2_32_S51442,wt2_H2O2_30_S51455,wt3_H2O2_31_S51454
Ca22chr1A_C_albicans_SC5314	macs2	peak	2860814	2861033	ID=peak_1437	wt2_32_S51442,wt3_33_S51443,wt3_H2O2_31_S51454,wt4_38_S51444
Ca22chr1A_C_albicans_SC5314	macs2	peak	2866149	2866430	ID=peak_1438	wt2_32_S51442,wt2_H2O2_30_S51455,wt3_33_S51443,wt3_H2O2_31_S51454,wt4_38_S51444,wt4_H2O2_39_S51445
Ca22chr1A_C_albicans_SC5314	macs2	peak	2868180	2868642	ID=peak_1439	wt2_32_S51442,wt2_H2O2_30_S51455,wt3_33_S51443,wt3_H2O2_31_S51454,wt4_38_S51444,wt4_H2O2_39_S51445
Ca22chr1A_C_albicans_SC5314	macs2	peak	2869238	2869306	ID=peak_1440	wt4_38_S51444
Ca22chr1A_C_albicans_SC5314	macs2	peak	2869756	2871097	ID=peak_1441	wt2_32_S51442,wt2_H2O2_30_S51455,wt3_33_S51443,wt3_H2O2_31_S51454,wt4_38_S51444,wt4_H2O2_39_S51445
Ca22chr1A_C_albicans_SC5314	macs2	peak	2871232	2871357	ID=peak_1442	wt2_H2O2_30_S51455,wt4_38_S51444,wt4_H2O2_39_S51445
Ca22chr1A_C_albicans_SC5314	macs2	peak	2871547	2871793	ID=peak_1443	wt2_H2O2_30_S51455,wt3_H2O2_31_S51454
Ca22chr1A_C_albicans_SC5314	macs2	peak	2871971	2872161	ID=peak_1444	wt2_H2O2_30_S51455,wt3_H2O2_31_S51454,wt4_H2O2_39_S51445
Ca22chr1A_C_albicans_SC5314	macs2	peak	2873801	2873930	ID=peak_1445	wt2_H2O2_30_S51455,wt3_H2O2_31_S51454
Ca22chr1A_C_albicans_SC5314	macs2	peak	2879297	2879391	ID=peak_1446	wt2_32_S51442,wt2_H2O2_30_S51455,wt3_33_S51443,wt3_H2O2_31_S51454,wt4_38_S51444,wt4_H2O2_39_S51445
Ca22chr1A_C_albicans_SC5314	macs2	peak	2880322	2880458	ID=peak_1447	wt2_H2O2_30_S51455,wt3_H2O2_31_S51454
Ca22chr1A_C_albicans_SC5314	macs2	peak	2882458	2883009	ID=peak_1448	wt2_32_S51442,wt2_H2O2_30_S51455,wt3_33_S51443,wt3_H2O2_31_S51454,wt4_38_S51444,wt4_H2O2_39_S51445
Ca22chr1A_C_albicans_SC5314	macs2	peak	2883288	2883376	ID=peak_1449	wt2_32_S51442
Ca22chr1A_C_albicans_SC5314	macs2	peak	2886118	2886376	ID=peak_1450	wt2_32_S51442,wt2_H2O2_30_S51455,wt3_33_S51443,wt3_H2O2_31_S51454,wt4_H2O2_39_S51445
Ca22chr1A_C_albicans_SC5314	macs2	peak	2886529	2886703	ID=peak_1451	wt2_H2O2_30_S51455,wt3_H2O2_31_S51454
Ca22chr1A_C_albicans_SC5314	macs2	peak	2886893	2887034	ID=peak_1452	wt3_33_S51443,wt3_H2O2_31_S51454
Ca22chr1A_C_albicans_SC5314	macs2	peak	2887186	2887567	ID=peak_1453	wt2_32_S51442,wt2_H2O2_30_S51455,wt3_33_S51443,wt3_H2O2_31_S51454,wt4_H2O2_39_S51445
Ca22chr1A_C_albicans_SC5314	macs2	peak	2889555	2890302	ID=peak_1454	wt2_32_S51442,wt2_H2O2_30_S51455,wt3_33_S51443,wt3_H2O2_31_S51454,wt4_38_S51444,wt4_H2O2_39_S51445
Ca22chr1A_C_albicans_SC5314	macs2	peak	2890366	2891050	ID=peak_1455	wt2_32_S51442,wt2_H2O2_30_S51455,wt3_33_S51443,wt3_H2O2_31_S51454,wt4_38_S51444,wt4_H2O2_39_S51445
Ca22chr1A_C_albicans_SC5314	macs2	peak	2891170	2891360	ID=peak_1456	wt2_32_S51442,wt2_H2O2_30_S51455,wt3_H2O2_31_S51454
Ca22chr1A_C_albicans_SC5314	macs2	peak	2891449	2891584	ID=peak_1457	wt2_32_S51442,wt2_H2O2_30_S51455,wt3_33_S51443,wt3_H2O2_31_S51454,wt4_H2O2_39_S51445
Ca22chr1A_C_albicans_SC5314	macs2	peak	2892976	2893172	ID=peak_1458	wt2_32_S51442,wt2_H2O2_30_S51455,wt3_33_S51443,wt3_H2O2_31_S51454,wt4_H2O2_39_S51445
Ca22chr1A_C_albicans_SC5314	macs2	peak	2893896	2894084	ID=peak_1459	wt2_32_S51442,wt2_H2O2_30_S51455,wt3_33_S51443,wt3_H2O2_31_S51454,wt4_H2O2_39_S51445
Ca22chr1A_C_albicans_SC5314	macs2	peak	2896221	2896292	ID=peak_1460	wt2_H2O2_30_S51455
Ca22chr1A_C_albicans_SC5314	macs2	peak	2901379	2901568	ID=peak_1461	wt2_32_S51442,wt2_H2O2_30_S51455,wt3_33_S51443,wt3_H2O2_31_S51454,wt4_38_S51444,wt4_H2O2_39_S51445
Ca22chr1A_C_albicans_SC5314	macs2	peak	2901870	2902132	ID=peak_1462	wt2_32_S51442,wt2_H2O2_30_S51455,wt3_33_S51443,wt3_H2O2_31_S51454,wt4_38_S51444,wt4_H2O2_39_S51445
Ca22chr1A_C_albicans_SC5314	macs2	peak	2906554	2906961	ID=peak_1463	wt2_32_S51442,wt2_H2O2_30_S51455,wt3_33_S51443,wt3_H2O2_31_S51454,wt4_38_S51444,wt4_H2O2_39_S51445
Ca22chr1A_C_albicans_SC5314	macs2	peak	2908404	2908612	ID=peak_1464	wt2_32_S51442,wt2_H2O2_30_S51455,wt3_33_S51443,wt3_H2O2_31_S51454
Ca22chr1A_C_albicans_SC5314	macs2	peak	2909128	2910348	ID=peak_1465	wt2_32_S51442,wt2_H2O2_30_S51455,wt3_33_S51443,wt3_H2O2_31_S51454,wt4_38_S51444,wt4_H2O2_39_S51445
Ca22chr1A_C_albicans_SC5314	macs2	peak	2910506	2911233	ID=peak_1466	wt2_32_S51442,wt2_H2O2_30_S51455,wt3_33_S51443,wt3_H2O2_31_S51454,wt4_38_S51444,wt4_H2O2_39_S51445
Ca22chr1A_C_albicans_SC5314	macs2	peak	2923183	2923483	ID=peak_1467	wt2_32_S51442,wt2_H2O2_30_S51455,wt3_33_S51443,wt3_H2O2_31_S51454,wt4_38_S51444,wt4_H2O2_39_S51445
Ca22chr1A_C_albicans_SC5314	macs2	peak	2923978	2924232	ID=peak_1468	wt2_32_S51442,wt2_H2O2_30_S51455,wt3_33_S51443,wt3_H2O2_31_S51454,wt4_38_S51444,wt4_H2O2_39_S51445
Ca22chr1A_C_albicans_SC5314	macs2	peak	2924308	2924619	ID=peak_1469	wt2_32_S51442,wt2_H2O2_30_S51455,wt3_33_S51443,wt3_H2O2_31_S51454
Ca22chr1A_C_albicans_SC5314	macs2	peak	2930934	2931020	ID=peak_1470	wt2_32_S51442,wt2_H2O2_30_S51455
Ca22chr1A_C_albicans_SC5314	macs2	peak	2933943	2934085	ID=peak_1471	wt2_32_S51442,wt2_H2O2_30_S51455,wt3_33_S51443,wt3_H2O2_31_S51454,wt4_38_S51444,wt4_H2O2_39_S51445
Ca22chr1A_C_albicans_SC5314	macs2	peak	2939146	2939264	ID=peak_1472	wt2_32_S51442,wt2_H2O2_30_S51455,wt3_33_S51443,wt3_H2O2_31_S51454
Ca22chr1A_C_albicans_SC5314	macs2	peak	2942598	2942968	ID=peak_1473	wt2_H2O2_30_S51455,wt3_33_S51443,wt3_H2O2_31_S51454,wt4_H2O2_39_S51445
Ca22chr1A_C_albicans_SC5314	macs2	peak	2943760	2943849	ID=peak_1474	wt2_H2O2_30_S51455
Ca22chr1A_C_albicans_SC5314	macs2	peak	2950717	2951027	ID=peak_1475	wt2_32_S51442,wt2_H2O2_30_S51455,wt3_33_S51443,wt3_H2O2_31_S51454,wt4_38_S51444,wt4_H2O2_39_S51445
Ca22chr1A_C_albicans_SC5314	macs2	peak	2954730	2955005	ID=peak_1476	wt2_32_S51442,wt2_H2O2_30_S51455,wt3_33_S51443,wt3_H2O2_31_S51454,wt4_38_S51444,wt4_H2O2_39_S51445
Ca22chr1A_C_albicans_SC5314	macs2	peak	2955181	2955362	ID=peak_1477	wt2_32_S51442,wt2_H2O2_30_S51455,wt3_33_S51443,wt3_H2O2_31_S51454,wt4_38_S51444,wt4_H2O2_39_S51445
Ca22chr1A_C_albicans_SC5314	macs2	peak	2959922	2960109	ID=peak_1478	wt2_32_S51442,wt2_H2O2_30_S51455,wt3_33_S51443,wt3_H2O2_31_S51454,wt4_38_S51444,wt4_H2O2_39_S51445
Ca22chr1A_C_albicans_SC5314	macs2	peak	2960461	2960702	ID=peak_1479	wt2_32_S51442,wt3_H2O2_31_S51454
Ca22chr1A_C_albicans_SC5314	macs2	peak	2962577	2962768	ID=peak_1480	wt2_32_S51442,wt2_H2O2_30_S51455,wt3_33_S51443,wt3_H2O2_31_S51454,wt4_38_S51444,wt4_H2O2_39_S51445
Ca22chr1A_C_albicans_SC5314	macs2	peak	2964068	2964181	ID=peak_1481	wt2_32_S51442,wt2_H2O2_30_S51455,wt3_33_S51443,wt3_H2O2_31_S51454
Ca22chr1A_C_albicans_SC5314	macs2	peak	2969750	2969824	ID=peak_1482	wt2_32_S51442,wt2_H2O2_30_S51455
Ca22chr1A_C_albicans_SC5314	macs2	peak	2971998	2972132	ID=peak_1483	wt2_32_S51442,wt2_H2O2_30_S51455,wt3_H2O2_31_S51454
Ca22chr1A_C_albicans_SC5314	macs2	peak	2972843	2972931	ID=peak_1484	wt2_32_S51442,wt2_H2O2_30_S51455,wt3_33_S51443,wt3_H2O2_31_S51454
Ca22chr1A_C_albicans_SC5314	macs2	peak	2973219	2973360	ID=peak_1485	wt4_H2O2_39_S51445
Ca22chr1A_C_albicans_SC5314	macs2	peak	2973428	2973851	ID=peak_1486	wt2_32_S51442,wt2_H2O2_30_S51455,wt3_33_S51443,wt3_H2O2_31_S51454,wt4_38_S51444,wt4_H2O2_39_S51445
Ca22chr1A_C_albicans_SC5314	macs2	peak	2974304	2974390	ID=peak_1487	wt2_H2O2_30_S51455,wt3_H2O2_31_S51454
Ca22chr1A_C_albicans_SC5314	macs2	peak	2974984	2975221	ID=peak_1488	wt2_32_S51442,wt2_H2O2_30_S51455,wt3_33_S51443,wt3_H2O2_31_S51454
Ca22chr1A_C_albicans_SC5314	macs2	peak	2975453	2975626	ID=peak_1489	wt2_32_S51442,wt2_H2O2_30_S51455,wt3_33_S51443,wt3_H2O2_31_S51454
Ca22chr1A_C_albicans_SC5314	macs2	peak	2979691	2979957	ID=peak_1490	wt2_32_S51442,wt2_H2O2_30_S51455,wt3_33_S51443,wt3_H2O2_31_S51454,wt4_38_S51444,wt4_H2O2_39_S51445
Ca22chr1A_C_albicans_SC5314	macs2	peak	2980068	2980160	ID=peak_1491	wt2_32_S51442
Ca22chr1A_C_albicans_SC5314	macs2	peak	2980978	2981211	ID=peak_1492	wt2_32_S51442,wt2_H2O2_30_S51455,wt3_33_S51443,wt3_H2O2_31_S51454,wt4_38_S51444,wt4_H2O2_39_S51445
Ca22chr1A_C_albicans_SC5314	macs2	peak	2984070	2984211	ID=peak_1493	wt2_32_S51442,wt2_H2O2_30_S51455,wt3_33_S51443,wt3_H2O2_31_S51454,wt4_H2O2_39_S51445
Ca22chr1A_C_albicans_SC5314	macs2	peak	2984692	2984861	ID=peak_1494	wt2_32_S51442,wt2_H2O2_30_S51455,wt3_33_S51443,wt3_H2O2_31_S51454,wt4_38_S51444,wt4_H2O2_39_S51445
Ca22chr1A_C_albicans_SC5314	macs2	peak	2990039	2990246	ID=peak_1495	wt2_32_S51442,wt2_H2O2_30_S51455,wt3_33_S51443,wt3_H2O2_31_S51454
Ca22chr1A_C_albicans_SC5314	macs2	peak	2990421	2990951	ID=peak_1496	wt2_32_S51442,wt2_H2O2_30_S51455,wt3_33_S51443,wt3_H2O2_31_S51454,wt4_38_S51444,wt4_H2O2_39_S51445
Ca22chr1A_C_albicans_SC5314	macs2	peak	2991179	2991625	ID=peak_1497	wt2_32_S51442,wt2_H2O2_30_S51455,wt3_33_S51443,wt3_H2O2_31_S51454,wt4_38_S51444,wt4_H2O2_39_S51445
Ca22chr1A_C_albicans_SC5314	macs2	peak	2991827	2992988	ID=peak_1498	wt2_32_S51442,wt2_H2O2_30_S51455,wt3_33_S51443,wt3_H2O2_31_S51454,wt4_38_S51444,wt4_H2O2_39_S51445
Ca22chr1A_C_albicans_SC5314	macs2	peak	2996341	2996534	ID=peak_1499	wt2_32_S51442,wt2_H2O2_30_S51455,wt3_33_S51443,wt3_H2O2_31_S51454,wt4_H2O2_39_S51445
Ca22chr1A_C_albicans_SC5314	macs2	peak	2996702	2996848	ID=peak_1500	wt2_32_S51442,wt2_H2O2_30_S51455,wt3_33_S51443,wt3_H2O2_31_S51454,wt4_H2O2_39_S51445
Ca22chr1A_C_albicans_SC5314	macs2	peak	2999278	2999580	ID=peak_1501	wt2_32_S51442,wt2_H2O2_30_S51455,wt3_33_S51443,wt3_H2O2_31_S51454,wt4_38_S51444,wt4_H2O2_39_S51445
Ca22chr1A_C_albicans_SC5314	macs2	peak	3002973	3003190	ID=peak_1502	wt2_32_S51442,wt2_H2O2_30_S51455,wt3_33_S51443,wt3_H2O2_31_S51454,wt4_38_S51444,wt4_H2O2_39_S51445
Ca22chr1A_C_albicans_SC5314	macs2	peak	3005835	3006121	ID=peak_1503	wt2_32_S51442,wt2_H2O2_30_S51455,wt3_33_S51443,wt3_H2O2_31_S51454,wt4_38_S51444,wt4_H2O2_39_S51445
Ca22chr1A_C_albicans_SC5314	macs2	peak	3008924	3009250	ID=peak_1504	wt2_32_S51442,wt2_H2O2_30_S51455,wt3_33_S51443,wt3_H2O2_31_S51454,wt4_38_S51444,wt4_H2O2_39_S51445
Ca22chr1A_C_albicans_SC5314	macs2	peak	3010025	3010155	ID=peak_1505	wt2_32_S51442,wt2_H2O2_30_S51455,wt3_33_S51443,wt3_H2O2_31_S51454
Ca22chr1A_C_albicans_SC5314	macs2	peak	3010312	3010664	ID=peak_1506	wt2_32_S51442,wt2_H2O2_30_S51455,wt3_33_S51443,wt3_H2O2_31_S51454,wt4_38_S51444,wt4_H2O2_39_S51445
Ca22chr1A_C_albicans_SC5314	macs2	peak	3010869	3011120	ID=peak_1507	wt2_32_S51442,wt2_H2O2_30_S51455,wt3_33_S51443,wt3_H2O2_31_S51454,wt4_38_S51444,wt4_H2O2_39_S51445
Ca22chr1A_C_albicans_SC5314	macs2	peak	3011676	3011824	ID=peak_1508	wt2_32_S51442,wt2_H2O2_30_S51455,wt3_33_S51443,wt3_H2O2_31_S51454,wt4_38_S51444
Ca22chr1A_C_albicans_SC5314	macs2	peak	3013709	3013798	ID=peak_1509	wt2_32_S51442
Ca22chr1A_C_albicans_SC5314	macs2	peak	3016990	3017265	ID=peak_1510	wt2_32_S51442,wt2_H2O2_30_S51455,wt3_33_S51443,wt3_H2O2_31_S51454,wt4_38_S51444,wt4_H2O2_39_S51445
Ca22chr1A_C_albicans_SC5314	macs2	peak	3023369	3023504	ID=peak_1511	wt2_32_S51442,wt2_H2O2_30_S51455,wt3_33_S51443,wt3_H2O2_31_S51454,wt4_H2O2_39_S51445
Ca22chr1A_C_albicans_SC5314	macs2	peak	3024475	3024670	ID=peak_1512	wt2_32_S51442,wt2_H2O2_30_S51455,wt3_33_S51443,wt3_H2O2_31_S51454,wt4_38_S51444,wt4_H2O2_39_S51445
Ca22chr1A_C_albicans_SC5314	macs2	peak	3025024	3025252	ID=peak_1513	wt2_32_S51442,wt2_H2O2_30_S51455,wt3_33_S51443,wt3_H2O2_31_S51454,wt4_38_S51444,wt4_H2O2_39_S51445
Ca22chr1A_C_albicans_SC5314	macs2	peak	3031192	3031347	ID=peak_1514	wt2_32_S51442,wt2_H2O2_30_S51455,wt3_33_S51443,wt3_H2O2_31_S51454,wt4_38_S51444,wt4_H2O2_39_S51445
Ca22chr1A_C_albicans_SC5314	macs2	peak	3032742	3032827	ID=peak_1515	wt2_32_S51442
Ca22chr1A_C_albicans_SC5314	macs2	peak	3034540	3034720	ID=peak_1516	wt2_32_S51442,wt2_H2O2_30_S51455,wt3_33_S51443,wt3_H2O2_31_S51454,wt4_38_S51444,wt4_H2O2_39_S51445
Ca22chr1A_C_albicans_SC5314	macs2	peak	3034843	3034911	ID=peak_1517	wt2_H2O2_30_S51455
Ca22chr1A_C_albicans_SC5314	macs2	peak	3038686	3038812	ID=peak_1518	wt2_H2O2_30_S51455,wt3_H2O2_31_S51454
Ca22chr1A_C_albicans_SC5314	macs2	peak	3040217	3040529	ID=peak_1519	wt2_32_S51442,wt2_H2O2_30_S51455,wt3_33_S51443,wt3_H2O2_31_S51454
Ca22chr1A_C_albicans_SC5314	macs2	peak	3040637	3040911	ID=peak_1520	wt2_32_S51442,wt2_H2O2_30_S51455,wt3_33_S51443,wt3_H2O2_31_S51454,wt4_38_S51444,wt4_H2O2_39_S51445
Ca22chr1A_C_albicans_SC5314	macs2	peak	3044999	3045240	ID=peak_1521	wt2_H2O2_30_S51455
Ca22chr1A_C_albicans_SC5314	macs2	peak	3045313	3046831	ID=peak_1522	wt2_H2O2_30_S51455,wt3_H2O2_31_S51454,wt4_H2O2_39_S51445
Ca22chr1A_C_albicans_SC5314	macs2	peak	3048100	3048314	ID=peak_1523	wt2_32_S51442,wt2_H2O2_30_S51455,wt3_33_S51443,wt3_H2O2_31_S51454,wt4_H2O2_39_S51445
Ca22chr1A_C_albicans_SC5314	macs2	peak	3048390	3048901	ID=peak_1524	wt2_32_S51442,wt2_H2O2_30_S51455,wt3_33_S51443,wt3_H2O2_31_S51454,wt4_38_S51444,wt4_H2O2_39_S51445
Ca22chr1A_C_albicans_SC5314	macs2	peak	3050012	3050111	ID=peak_1525	wt2_H2O2_30_S51455,wt3_H2O2_31_S51454
Ca22chr1A_C_albicans_SC5314	macs2	peak	3050440	3050601	ID=peak_1526	wt2_H2O2_30_S51455,wt4_H2O2_39_S51445
Ca22chr1A_C_albicans_SC5314	macs2	peak	3050678	3050797	ID=peak_1527	wt2_H2O2_30_S51455,wt4_H2O2_39_S51445
Ca22chr1A_C_albicans_SC5314	macs2	peak	3050955	3051072	ID=peak_1528	wt2_32_S51442,wt2_H2O2_30_S51455,wt3_33_S51443,wt3_H2O2_31_S51454
Ca22chr1A_C_albicans_SC5314	macs2	peak	3051178	3051257	ID=peak_1529	wt2_H2O2_30_S51455
Ca22chr1A_C_albicans_SC5314	macs2	peak	3052286	3052375	ID=peak_1530	wt4_H2O2_39_S51445
Ca22chr1A_C_albicans_SC5314	macs2	peak	3056245	3056335	ID=peak_1531	wt4_38_S51444
Ca22chr1A_C_albicans_SC5314	macs2	peak	3057159	3057227	ID=peak_1532	wt3_H2O2_31_S51454
Ca22chr1A_C_albicans_SC5314	macs2	peak	3057712	3057792	ID=peak_1533	wt2_H2O2_30_S51455,wt3_H2O2_31_S51454
Ca22chr1A_C_albicans_SC5314	macs2	peak	3058175	3058243	ID=peak_1534	wt4_H2O2_39_S51445
Ca22chr1A_C_albicans_SC5314	macs2	peak	3058394	3058774	ID=peak_1535	wt2_32_S51442,wt2_H2O2_30_S51455,wt3_33_S51443,wt3_H2O2_31_S51454,wt4_38_S51444,wt4_H2O2_39_S51445
Ca22chr1A_C_albicans_SC5314	macs2	peak	3060373	3060450	ID=peak_1536	wt3_33_S51443
Ca22chr1A_C_albicans_SC5314	macs2	peak	3060502	3060621	ID=peak_1537	wt2_32_S51442
Ca22chr1A_C_albicans_SC5314	macs2	peak	3060798	3061113	ID=peak_1538	wt2_32_S51442,wt2_H2O2_30_S51455,wt3_33_S51443,wt3_H2O2_31_S51454
Ca22chr1A_C_albicans_SC5314	macs2	peak	3063412	3063748	ID=peak_1539	wt2_32_S51442,wt2_H2O2_30_S51455,wt3_33_S51443,wt3_H2O2_31_S51454,wt4_38_S51444,wt4_H2O2_39_S51445
Ca22chr1A_C_albicans_SC5314	macs2	peak	3065020	3065101	ID=peak_1540	wt4_38_S51444
Ca22chr1A_C_albicans_SC5314	macs2	peak	3065486	3065594	ID=peak_1541	wt2_32_S51442,wt2_H2O2_30_S51455,wt3_33_S51443,wt4_H2O2_39_S51445
Ca22chr1A_C_albicans_SC5314	macs2	peak	3065686	3065784	ID=peak_1542	wt2_H2O2_30_S51455,wt3_H2O2_31_S51454
Ca22chr1A_C_albicans_SC5314	macs2	peak	3066831	3067299	ID=peak_1543	wt2_32_S51442,wt2_H2O2_30_S51455,wt3_33_S51443,wt3_H2O2_31_S51454,wt4_38_S51444,wt4_H2O2_39_S51445
Ca22chr1A_C_albicans_SC5314	macs2	peak	3069579	3069761	ID=peak_1544	wt2_H2O2_30_S51455,wt3_H2O2_31_S51454
Ca22chr1A_C_albicans_SC5314	macs2	peak	3069910	3070554	ID=peak_1545	wt2_32_S51442,wt2_H2O2_30_S51455,wt3_33_S51443,wt3_H2O2_31_S51454,wt4_38_S51444,wt4_H2O2_39_S51445
Ca22chr1A_C_albicans_SC5314	macs2	peak	3070763	3071093	ID=peak_1546	wt2_H2O2_30_S51455,wt3_33_S51443,wt3_H2O2_31_S51454
Ca22chr1A_C_albicans_SC5314	macs2	peak	3071373	3071621	ID=peak_1547	wt2_H2O2_30_S51455,wt3_H2O2_31_S51454
Ca22chr1A_C_albicans_SC5314	macs2	peak	3071934	3072555	ID=peak_1548	wt2_32_S51442,wt2_H2O2_30_S51455,wt3_33_S51443,wt3_H2O2_31_S51454,wt4_38_S51444,wt4_H2O2_39_S51445
Ca22chr1A_C_albicans_SC5314	macs2	peak	3072684	3073487	ID=peak_1549	wt2_32_S51442,wt2_H2O2_30_S51455,wt3_33_S51443,wt3_H2O2_31_S51454,wt4_38_S51444,wt4_H2O2_39_S51445
Ca22chr1A_C_albicans_SC5314	macs2	peak	3073630	3073787	ID=peak_1550	wt2_32_S51442,wt2_H2O2_30_S51455,wt3_H2O2_31_S51454
Ca22chr1A_C_albicans_SC5314	macs2	peak	3074294	3074387	ID=peak_1551	wt4_38_S51444
Ca22chr1A_C_albicans_SC5314	macs2	peak	3074707	3074847	ID=peak_1552	wt4_38_S51444
Ca22chr1A_C_albicans_SC5314	macs2	peak	3074938	3075090	ID=peak_1553	wt4_38_S51444
Ca22chr1A_C_albicans_SC5314	macs2	peak	3075802	3075907	ID=peak_1554	wt2_32_S51442
Ca22chr1A_C_albicans_SC5314	macs2	peak	3076213	3076395	ID=peak_1555	wt2_32_S51442,wt2_H2O2_30_S51455,wt3_33_S51443,wt3_H2O2_31_S51454
Ca22chr1A_C_albicans_SC5314	macs2	peak	3080344	3080800	ID=peak_1556	wt2_32_S51442,wt2_H2O2_30_S51455,wt3_33_S51443,wt3_H2O2_31_S51454,wt4_38_S51444,wt4_H2O2_39_S51445
Ca22chr1A_C_albicans_SC5314	macs2	peak	3083442	3083599	ID=peak_1557	wt2_32_S51442,wt2_H2O2_30_S51455,wt3_33_S51443,wt3_H2O2_31_S51454,wt4_38_S51444
Ca22chr1A_C_albicans_SC5314	macs2	peak	3086712	3086883	ID=peak_1558	wt2_32_S51442,wt2_H2O2_30_S51455,wt3_33_S51443,wt3_H2O2_31_S51454,wt4_H2O2_39_S51445
Ca22chr1A_C_albicans_SC5314	macs2	peak	3088831	3088973	ID=peak_1559	wt2_32_S51442,wt2_H2O2_30_S51455
Ca22chr1A_C_albicans_SC5314	macs2	peak	3089690	3089788	ID=peak_1560	wt2_32_S51442,wt2_H2O2_30_S51455,wt3_H2O2_31_S51454,wt4_38_S51444,wt4_H2O2_39_S51445
Ca22chr1A_C_albicans_SC5314	macs2	peak	3091045	3091133	ID=peak_1561	wt2_32_S51442,wt2_H2O2_30_S51455
Ca22chr1A_C_albicans_SC5314	macs2	peak	3096791	3096997	ID=peak_1562	wt2_32_S51442,wt2_H2O2_30_S51455,wt3_33_S51443,wt3_H2O2_31_S51454
Ca22chr1A_C_albicans_SC5314	macs2	peak	3098798	3099122	ID=peak_1563	wt2_32_S51442,wt2_H2O2_30_S51455,wt3_33_S51443,wt3_H2O2_31_S51454,wt4_38_S51444,wt4_H2O2_39_S51445
Ca22chr1A_C_albicans_SC5314	macs2	peak	3104641	3104842	ID=peak_1564	wt2_32_S51442,wt2_H2O2_30_S51455,wt3_33_S51443,wt3_H2O2_31_S51454,wt4_38_S51444
Ca22chr1A_C_albicans_SC5314	macs2	peak	3105360	3105538	ID=peak_1565	wt2_32_S51442,wt2_H2O2_30_S51455,wt3_33_S51443,wt3_H2O2_31_S51454,wt4_38_S51444,wt4_H2O2_39_S51445
Ca22chr1A_C_albicans_SC5314	macs2	peak	3106003	3106117	ID=peak_1566	wt4_38_S51444
Ca22chr1A_C_albicans_SC5314	macs2	peak	3107347	3107629	ID=peak_1567	wt4_38_S51444
Ca22chr1A_C_albicans_SC5314	macs2	peak	3107655	3107923	ID=peak_1568	wt2_32_S51442,wt2_H2O2_30_S51455,wt3_33_S51443,wt3_H2O2_31_S51454
Ca22chr1A_C_albicans_SC5314	macs2	peak	3108190	3108265	ID=peak_1569	wt4_38_S51444
Ca22chr1A_C_albicans_SC5314	macs2	peak	3108335	3108605	ID=peak_1570	wt4_38_S51444
Ca22chr1A_C_albicans_SC5314	macs2	peak	3109056	3109808	ID=peak_1571	wt2_32_S51442,wt2_H2O2_30_S51455,wt3_33_S51443,wt3_H2O2_31_S51454,wt4_38_S51444,wt4_H2O2_39_S51445
Ca22chr1A_C_albicans_SC5314	macs2	peak	3110103	3110729	ID=peak_1572	wt2_32_S51442,wt2_H2O2_30_S51455,wt3_33_S51443,wt3_H2O2_31_S51454,wt4_38_S51444,wt4_H2O2_39_S51445
Ca22chr1A_C_albicans_SC5314	macs2	peak	3110829	3111674	ID=peak_1573	wt2_32_S51442,wt2_H2O2_30_S51455,wt3_33_S51443,wt3_H2O2_31_S51454,wt4_38_S51444,wt4_H2O2_39_S51445
Ca22chr1A_C_albicans_SC5314	macs2	peak	3111802	3112378	ID=peak_1574	wt2_32_S51442,wt2_H2O2_30_S51455,wt3_33_S51443,wt3_H2O2_31_S51454,wt4_38_S51444,wt4_H2O2_39_S51445
Ca22chr1A_C_albicans_SC5314	macs2	peak	3112549	3112784	ID=peak_1575	wt2_32_S51442,wt2_H2O2_30_S51455,wt3_33_S51443,wt3_H2O2_31_S51454,wt4_H2O2_39_S51445
Ca22chr1A_C_albicans_SC5314	macs2	peak	3112853	3113147	ID=peak_1576	wt2_32_S51442,wt2_H2O2_30_S51455,wt3_33_S51443,wt3_H2O2_31_S51454,wt4_38_S51444,wt4_H2O2_39_S51445
Ca22chr1A_C_albicans_SC5314	macs2	peak	3117585	3117677	ID=peak_1577	wt4_38_S51444
Ca22chr1A_C_albicans_SC5314	macs2	peak	3118315	3118394	ID=peak_1578	wt4_38_S51444,wt4_H2O2_39_S51445
Ca22chr1A_C_albicans_SC5314	macs2	peak	3118862	3119103	ID=peak_1579	wt2_32_S51442,wt2_H2O2_30_S51455,wt3_33_S51443,wt3_H2O2_31_S51454,wt4_38_S51444,wt4_H2O2_39_S51445
Ca22chr1A_C_albicans_SC5314	macs2	peak	3119182	3119293	ID=peak_1580	wt2_32_S51442
Ca22chr1A_C_albicans_SC5314	macs2	peak	3120152	3120441	ID=peak_1581	wt2_32_S51442,wt2_H2O2_30_S51455,wt3_33_S51443,wt3_H2O2_31_S51454,wt4_38_S51444,wt4_H2O2_39_S51445
Ca22chr1A_C_albicans_SC5314	macs2	peak	3120508	3120912	ID=peak_1582	wt2_32_S51442,wt2_H2O2_30_S51455,wt3_33_S51443,wt3_H2O2_31_S51454,wt4_38_S51444,wt4_H2O2_39_S51445
Ca22chr1A_C_albicans_SC5314	macs2	peak	3122810	3122993	ID=peak_1583	wt2_32_S51442,wt2_H2O2_30_S51455,wt3_33_S51443,wt3_H2O2_31_S51454,wt4_38_S51444,wt4_H2O2_39_S51445
Ca22chr1A_C_albicans_SC5314	macs2	peak	3127317	3127564	ID=peak_1584	wt2_32_S51442,wt2_H2O2_30_S51455,wt3_33_S51443,wt3_H2O2_31_S51454,wt4_H2O2_39_S51445
Ca22chr1A_C_albicans_SC5314	macs2	peak	3130156	3130235	ID=peak_1585	wt4_H2O2_39_S51445
Ca22chr1A_C_albicans_SC5314	macs2	peak	3131392	3131952	ID=peak_1586	wt2_32_S51442,wt2_H2O2_30_S51455,wt3_33_S51443,wt3_H2O2_31_S51454,wt4_H2O2_39_S51445
Ca22chr1A_C_albicans_SC5314	macs2	peak	3133189	3133270	ID=peak_1587	wt4_38_S51444
Ca22chr1A_C_albicans_SC5314	macs2	peak	3134396	3134583	ID=peak_1588	wt2_32_S51442
Ca22chr1A_C_albicans_SC5314	macs2	peak	3134778	3135105	ID=peak_1589	wt2_32_S51442,wt2_H2O2_30_S51455,wt3_33_S51443,wt3_H2O2_31_S51454,wt4_38_S51444,wt4_H2O2_39_S51445
Ca22chr1A_C_albicans_SC5314	macs2	peak	3135206	3135450	ID=peak_1590	wt2_32_S51442,wt2_H2O2_30_S51455,wt3_33_S51443,wt3_H2O2_31_S51454,wt4_38_S51444,wt4_H2O2_39_S51445
Ca22chr1A_C_albicans_SC5314	macs2	peak	3135518	3135659	ID=peak_1591	wt2_32_S51442,wt2_H2O2_30_S51455,wt3_H2O2_31_S51454
Ca22chr1A_C_albicans_SC5314	macs2	peak	3138558	3138671	ID=peak_1592	wt4_38_S51444
Ca22chr1A_C_albicans_SC5314	macs2	peak	3141212	3141284	ID=peak_1593	wt4_38_S51444
Ca22chr1A_C_albicans_SC5314	macs2	peak	3142582	3142685	ID=peak_1594	wt4_38_S51444
Ca22chr1A_C_albicans_SC5314	macs2	peak	3143676	3143907	ID=peak_1595	wt2_H2O2_30_S51455,wt3_H2O2_31_S51454
Ca22chr1A_C_albicans_SC5314	macs2	peak	3145038	3145114	ID=peak_1596	wt2_32_S51442,wt3_H2O2_31_S51454
Ca22chr1A_C_albicans_SC5314	macs2	peak	3146614	3146690	ID=peak_1597	wt4_38_S51444
Ca22chr1A_C_albicans_SC5314	macs2	peak	3147518	3147677	ID=peak_1598	wt2_32_S51442,wt2_H2O2_30_S51455,wt3_33_S51443,wt3_H2O2_31_S51454
Ca22chr1A_C_albicans_SC5314	macs2	peak	3148372	3148627	ID=peak_1599	wt4_38_S51444
Ca22chr1A_C_albicans_SC5314	macs2	peak	3149783	3149930	ID=peak_1600	wt4_38_S51444,wt4_H2O2_39_S51445
Ca22chr1A_C_albicans_SC5314	macs2	peak	3150334	3150981	ID=peak_1601	wt2_32_S51442,wt2_H2O2_30_S51455,wt3_33_S51443,wt3_H2O2_31_S51454,wt4_38_S51444,wt4_H2O2_39_S51445
Ca22chr1A_C_albicans_SC5314	macs2	peak	3151073	3151153	ID=peak_1602	wt3_H2O2_31_S51454
Ca22chr1A_C_albicans_SC5314	macs2	peak	3154717	3155085	ID=peak_1603	wt2_32_S51442,wt2_H2O2_30_S51455,wt3_33_S51443,wt3_H2O2_31_S51454,wt4_38_S51444,wt4_H2O2_39_S51445
Ca22chr1A_C_albicans_SC5314	macs2	peak	3155819	3155924	ID=peak_1604	wt2_H2O2_30_S51455
Ca22chr1A_C_albicans_SC5314	macs2	peak	3156321	3156400	ID=peak_1605	wt4_H2O2_39_S51445
Ca22chr1A_C_albicans_SC5314	macs2	peak	3156798	3157026	ID=peak_1606	wt2_32_S51442,wt2_H2O2_30_S51455,wt3_33_S51443,wt3_H2O2_31_S51454,wt4_38_S51444
Ca22chr1A_C_albicans_SC5314	macs2	peak	3157040	3157346	ID=peak_1607	wt4_38_S51444
Ca22chr1A_C_albicans_SC5314	macs2	peak	3159152	3159278	ID=peak_1608	wt4_38_S51444
Ca22chr1A_C_albicans_SC5314	macs2	peak	3160282	3160444	ID=peak_1609	wt4_38_S51444,wt4_H2O2_39_S51445
Ca22chr1A_C_albicans_SC5314	macs2	peak	3160641	3161485	ID=peak_1610	wt2_32_S51442,wt2_H2O2_30_S51455,wt3_33_S51443,wt3_H2O2_31_S51454,wt4_38_S51444,wt4_H2O2_39_S51445
Ca22chr1A_C_albicans_SC5314	macs2	peak	3161579	3161736	ID=peak_1611	wt3_H2O2_31_S51454,wt4_38_S51444,wt4_H2O2_39_S51445
Ca22chr1A_C_albicans_SC5314	macs2	peak	3161831	3162075	ID=peak_1612	wt2_32_S51442,wt2_H2O2_30_S51455,wt3_33_S51443,wt3_H2O2_31_S51454,wt4_38_S51444,wt4_H2O2_39_S51445
Ca22chr1A_C_albicans_SC5314	macs2	peak	3162225	3162309	ID=peak_1613	wt4_38_S51444
Ca22chr1A_C_albicans_SC5314	macs2	peak	3163034	3163227	ID=peak_1614	wt4_38_S51444
Ca22chr1A_C_albicans_SC5314	macs2	peak	3163582	3163827	ID=peak_1615	wt4_38_S51444,wt4_H2O2_39_S51445
Ca22chr1A_C_albicans_SC5314	macs2	peak	3164359	3164531	ID=peak_1616	wt2_32_S51442,wt2_H2O2_30_S51455,wt3_H2O2_31_S51454
Ca22chr1A_C_albicans_SC5314	macs2	peak	3164683	3164951	ID=peak_1617	wt2_32_S51442,wt2_H2O2_30_S51455,wt3_33_S51443,wt3_H2O2_31_S51454,wt4_38_S51444,wt4_H2O2_39_S51445
Ca22chr1A_C_albicans_SC5314	macs2	peak	3165305	3165524	ID=peak_1618	wt2_32_S51442,wt2_H2O2_30_S51455,wt3_33_S51443,wt3_H2O2_31_S51454,wt4_38_S51444,wt4_H2O2_39_S51445
Ca22chr1A_C_albicans_SC5314	macs2	peak	3165772	3165926	ID=peak_1619	wt4_38_S51444
Ca22chr1A_C_albicans_SC5314	macs2	peak	3167954	3168092	ID=peak_1620	wt4_38_S51444
Ca22chr1A_C_albicans_SC5314	macs2	peak	3168896	3169140	ID=peak_1621	wt4_38_S51444
Ca22chr1A_C_albicans_SC5314	macs2	peak	3169184	3169283	ID=peak_1622	wt4_H2O2_39_S51445
Ca22chr1A_C_albicans_SC5314	macs2	peak	3170024	3170097	ID=peak_1623	wt4_38_S51444
Ca22chr1A_C_albicans_SC5314	macs2	peak	3170481	3170617	ID=peak_1624	wt4_38_S51444
Ca22chr1A_C_albicans_SC5314	macs2	peak	3170836	3171202	ID=peak_1625	wt4_38_S51444,wt4_H2O2_39_S51445
Ca22chr1A_C_albicans_SC5314	macs2	peak	3171332	3171508	ID=peak_1626	wt4_38_S51444,wt4_H2O2_39_S51445
Ca22chr1A_C_albicans_SC5314	macs2	peak	3171553	3171646	ID=peak_1627	wt2_32_S51442,wt2_H2O2_30_S51455,wt3_H2O2_31_S51454
Ca22chr1A_C_albicans_SC5314	macs2	peak	3171894	3172213	ID=peak_1628	wt3_H2O2_31_S51454,wt4_38_S51444,wt4_H2O2_39_S51445
Ca22chr1A_C_albicans_SC5314	macs2	peak	3172777	3172898	ID=peak_1629	wt4_H2O2_39_S51445
Ca22chr1A_C_albicans_SC5314	macs2	peak	3172998	3173413	ID=peak_1630	wt2_32_S51442,wt2_H2O2_30_S51455,wt3_H2O2_31_S51454,wt4_38_S51444,wt4_H2O2_39_S51445
Ca22chr1A_C_albicans_SC5314	macs2	peak	3173700	3173832	ID=peak_1631	wt4_38_S51444
Ca22chr1A_C_albicans_SC5314	macs2	peak	3173987	3174339	ID=peak_1632	wt4_38_S51444
Ca22chr1A_C_albicans_SC5314	macs2	peak	3174392	3174488	ID=peak_1633	wt3_H2O2_31_S51454
Ca22chr1A_C_albicans_SC5314	macs2	peak	3174542	3174623	ID=peak_1634	wt4_H2O2_39_S51445
Ca22chr1A_C_albicans_SC5314	macs2	peak	3174784	3174916	ID=peak_1635	wt4_38_S51444
Ca22chr1A_C_albicans_SC5314	macs2	peak	3175340	3175456	ID=peak_1636	wt2_32_S51442,wt2_H2O2_30_S51455,wt3_H2O2_31_S51454
Ca22chr1A_C_albicans_SC5314	macs2	peak	3175620	3175725	ID=peak_1637	wt3_33_S51443,wt4_H2O2_39_S51445
Ca22chr1A_C_albicans_SC5314	macs2	peak	3176047	3176197	ID=peak_1638	wt4_38_S51444
Ca22chr1A_C_albicans_SC5314	macs2	peak	3176351	3176430	ID=peak_1639	wt4_H2O2_39_S51445
Ca22chr1A_C_albicans_SC5314	macs2	peak	3177043	3177212	ID=peak_1640	wt4_38_S51444
Ca22chr1A_C_albicans_SC5314	macs2	peak	3178053	3178263	ID=peak_1641	wt2_32_S51442,wt2_H2O2_30_S51455,wt3_33_S51443,wt3_H2O2_31_S51454,wt4_38_S51444,wt4_H2O2_39_S51445
Ca22chr1A_C_albicans_SC5314	macs2	peak	3178943	3179087	ID=peak_1642	wt4_38_S51444
Ca22chr1A_C_albicans_SC5314	macs2	peak	3179498	3179683	ID=peak_1643	wt4_38_S51444
Ca22chr1A_C_albicans_SC5314	macs2	peak	3180340	3180654	ID=peak_1644	wt4_38_S51444,wt4_H2O2_39_S51445
Ca22chr1A_C_albicans_SC5314	macs2	peak	3180682	3180790	ID=peak_1645	wt2_H2O2_30_S51455
Ca22chr1A_C_albicans_SC5314	macs2	peak	3181529	3181629	ID=peak_1646	wt2_32_S51442,wt2_H2O2_30_S51455,wt3_33_S51443,wt3_H2O2_31_S51454,wt4_38_S51444
Ca22chr1A_C_albicans_SC5314	macs2	peak	3182961	3183231	ID=peak_1647	wt2_32_S51442,wt2_H2O2_30_S51455,wt3_33_S51443,wt3_H2O2_31_S51454,wt4_38_S51444
Ca22chr1A_C_albicans_SC5314	macs2	peak	3183303	3183402	ID=peak_1648	wt4_H2O2_39_S51445
Ca22chr1A_C_albicans_SC5314	macs2	peak	3183512	3183689	ID=peak_1649	wt2_H2O2_30_S51455,wt3_H2O2_31_S51454,wt4_38_S51444,wt4_H2O2_39_S51445
Ca22chr1A_C_albicans_SC5314	macs2	peak	3187035	3187231	ID=peak_1650	wt2_32_S51442,wt2_H2O2_30_S51455,wt3_33_S51443,wt3_H2O2_31_S51454
Ca22chr2A_C_albicans_SC5314	macs2	peak	220	303	ID=peak_1651	wt2_H2O2_30_S51455
Ca22chr2A_C_albicans_SC5314	macs2	peak	1459	1531	ID=peak_1652	wt2_32_S51442,wt2_H2O2_30_S51455,wt3_33_S51443,wt3_H2O2_31_S51454
Ca22chr2A_C_albicans_SC5314	macs2	peak	2780	2851	ID=peak_1653	wt4_H2O2_39_S51445
Ca22chr2A_C_albicans_SC5314	macs2	peak	3673	3761	ID=peak_1654	wt4_38_S51444
Ca22chr2A_C_albicans_SC5314	macs2	peak	5573	5663	ID=peak_1655	wt2_32_S51442,wt2_H2O2_30_S51455,wt3_H2O2_31_S51454
Ca22chr2A_C_albicans_SC5314	macs2	peak	5853	6035	ID=peak_1656	wt4_38_S51444
Ca22chr2A_C_albicans_SC5314	macs2	peak	6623	6696	ID=peak_1657	wt4_38_S51444
Ca22chr2A_C_albicans_SC5314	macs2	peak	7054	7166	ID=peak_1658	wt2_32_S51442
Ca22chr2A_C_albicans_SC5314	macs2	peak	7238	7995	ID=peak_1659	wt2_32_S51442,wt2_H2O2_30_S51455,wt3_33_S51443,wt3_H2O2_31_S51454,wt4_38_S51444,wt4_H2O2_39_S51445
Ca22chr2A_C_albicans_SC5314	macs2	peak	8520	8667	ID=peak_1660	wt4_38_S51444
Ca22chr2A_C_albicans_SC5314	macs2	peak	8871	8986	ID=peak_1661	wt4_H2O2_39_S51445
Ca22chr2A_C_albicans_SC5314	macs2	peak	9331	9419	ID=peak_1662	wt2_32_S51442,wt2_H2O2_30_S51455,wt3_H2O2_31_S51454
Ca22chr2A_C_albicans_SC5314	macs2	peak	11231	11312	ID=peak_1663	wt4_38_S51444
Ca22chr2A_C_albicans_SC5314	macs2	peak	11418	11590	ID=peak_1664	wt4_38_S51444,wt4_H2O2_39_S51445
Ca22chr2A_C_albicans_SC5314	macs2	peak	12212	12314	ID=peak_1665	wt4_38_S51444
Ca22chr2A_C_albicans_SC5314	macs2	peak	12582	12865	ID=peak_1666	wt2_32_S51442,wt4_38_S51444,wt4_H2O2_39_S51445
Ca22chr2A_C_albicans_SC5314	macs2	peak	13011	13130	ID=peak_1667	wt4_38_S51444,wt4_H2O2_39_S51445
Ca22chr2A_C_albicans_SC5314	macs2	peak	13453	13611	ID=peak_1668	wt4_38_S51444
Ca22chr2A_C_albicans_SC5314	macs2	peak	14460	14813	ID=peak_1669	wt2_32_S51442,wt2_H2O2_30_S51455,wt3_33_S51443,wt3_H2O2_31_S51454,wt4_38_S51444,wt4_H2O2_39_S51445
Ca22chr2A_C_albicans_SC5314	macs2	peak	14869	15019	ID=peak_1670	wt4_38_S51444,wt4_H2O2_39_S51445
Ca22chr2A_C_albicans_SC5314	macs2	peak	16070	16197	ID=peak_1671	wt4_38_S51444
Ca22chr2A_C_albicans_SC5314	macs2	peak	17479	17596	ID=peak_1672	wt4_38_S51444
Ca22chr2A_C_albicans_SC5314	macs2	peak	17751	17833	ID=peak_1673	wt4_38_S51444
Ca22chr2A_C_albicans_SC5314	macs2	peak	17915	18828	ID=peak_1674	wt2_32_S51442,wt2_H2O2_30_S51455,wt3_33_S51443,wt3_H2O2_31_S51454,wt4_38_S51444,wt4_H2O2_39_S51445
Ca22chr2A_C_albicans_SC5314	macs2	peak	19007	19135	ID=peak_1675	wt2_32_S51442,wt2_H2O2_30_S51455,wt3_H2O2_31_S51454
Ca22chr2A_C_albicans_SC5314	macs2	peak	19547	19703	ID=peak_1676	wt4_38_S51444,wt4_H2O2_39_S51445
Ca22chr2A_C_albicans_SC5314	macs2	peak	20261	20389	ID=peak_1677	wt4_38_S51444
Ca22chr2A_C_albicans_SC5314	macs2	peak	20685	20763	ID=peak_1678	wt4_38_S51444
Ca22chr2A_C_albicans_SC5314	macs2	peak	21323	21533	ID=peak_1679	wt2_32_S51442,wt2_H2O2_30_S51455,wt3_33_S51443,wt3_H2O2_31_S51454,wt4_38_S51444,wt4_H2O2_39_S51445
Ca22chr2A_C_albicans_SC5314	macs2	peak	24398	24523	ID=peak_1680	wt4_H2O2_39_S51445
Ca22chr2A_C_albicans_SC5314	macs2	peak	24809	24899	ID=peak_1681	wt2_32_S51442,wt3_33_S51443
Ca22chr2A_C_albicans_SC5314	macs2	peak	25893	26015	ID=peak_1682	wt2_32_S51442,wt2_H2O2_30_S51455,wt3_33_S51443,wt3_H2O2_31_S51454,wt4_38_S51444
Ca22chr2A_C_albicans_SC5314	macs2	peak	26540	26634	ID=peak_1683	wt4_38_S51444
Ca22chr2A_C_albicans_SC5314	macs2	peak	27437	27552	ID=peak_1684	wt2_32_S51442,wt2_H2O2_30_S51455,wt3_33_S51443,wt3_H2O2_31_S51454
Ca22chr2A_C_albicans_SC5314	macs2	peak	28290	28561	ID=peak_1685	wt2_32_S51442,wt2_H2O2_30_S51455,wt3_33_S51443,wt3_H2O2_31_S51454,wt4_38_S51444,wt4_H2O2_39_S51445
Ca22chr2A_C_albicans_SC5314	macs2	peak	30279	30353	ID=peak_1686	wt3_H2O2_31_S51454
Ca22chr2A_C_albicans_SC5314	macs2	peak	31467	31900	ID=peak_1687	wt3_H2O2_31_S51454
Ca22chr2A_C_albicans_SC5314	macs2	peak	32267	32451	ID=peak_1688	wt4_38_S51444,wt4_H2O2_39_S51445
Ca22chr2A_C_albicans_SC5314	macs2	peak	32683	33979	ID=peak_1689	wt2_32_S51442,wt2_H2O2_30_S51455,wt3_33_S51443,wt3_H2O2_31_S51454,wt4_38_S51444,wt4_H2O2_39_S51445
Ca22chr2A_C_albicans_SC5314	macs2	peak	34442	34543	ID=peak_1690	wt4_H2O2_39_S51445
Ca22chr2A_C_albicans_SC5314	macs2	peak	34898	35198	ID=peak_1691	wt2_32_S51442,wt2_H2O2_30_S51455,wt3_33_S51443,wt3_H2O2_31_S51454,wt4_38_S51444,wt4_H2O2_39_S51445
Ca22chr2A_C_albicans_SC5314	macs2	peak	35369	35439	ID=peak_1692	wt4_38_S51444
Ca22chr2A_C_albicans_SC5314	macs2	peak	36636	36708	ID=peak_1693	wt4_H2O2_39_S51445
Ca22chr2A_C_albicans_SC5314	macs2	peak	38386	38497	ID=peak_1694	wt2_32_S51442,wt2_H2O2_30_S51455,wt3_33_S51443,wt3_H2O2_31_S51454
Ca22chr2A_C_albicans_SC5314	macs2	peak	41953	42315	ID=peak_1695	wt2_H2O2_30_S51455,wt3_H2O2_31_S51454
Ca22chr2A_C_albicans_SC5314	macs2	peak	42407	42489	ID=peak_1696	wt3_H2O2_31_S51454,wt4_38_S51444,wt4_H2O2_39_S51445
Ca22chr2A_C_albicans_SC5314	macs2	peak	43655	43825	ID=peak_1697	wt2_32_S51442,wt2_H2O2_30_S51455,wt3_33_S51443,wt3_H2O2_31_S51454,wt4_H2O2_39_S51445
Ca22chr2A_C_albicans_SC5314	macs2	peak	49771	49962	ID=peak_1698	wt2_32_S51442,wt2_H2O2_30_S51455,wt3_33_S51443,wt3_H2O2_31_S51454,wt4_H2O2_39_S51445
Ca22chr2A_C_albicans_SC5314	macs2	peak	50019	50167	ID=peak_1699	wt2_32_S51442,wt2_H2O2_30_S51455,wt3_H2O2_31_S51454
Ca22chr2A_C_albicans_SC5314	macs2	peak	54043	54110	ID=peak_1700	wt4_38_S51444
Ca22chr2A_C_albicans_SC5314	macs2	peak	55303	55517	ID=peak_1701	wt2_32_S51442,wt2_H2O2_30_S51455,wt3_33_S51443,wt3_H2O2_31_S51454
Ca22chr2A_C_albicans_SC5314	macs2	peak	56784	56945	ID=peak_1702	wt2_32_S51442,wt2_H2O2_30_S51455,wt3_33_S51443,wt3_H2O2_31_S51454,wt4_H2O2_39_S51445
Ca22chr2A_C_albicans_SC5314	macs2	peak	57911	58041	ID=peak_1703	wt2_32_S51442,wt2_H2O2_30_S51455,wt3_33_S51443,wt3_H2O2_31_S51454,wt4_38_S51444,wt4_H2O2_39_S51445
Ca22chr2A_C_albicans_SC5314	macs2	peak	58771	58860	ID=peak_1704	wt2_32_S51442,wt2_H2O2_30_S51455
Ca22chr2A_C_albicans_SC5314	macs2	peak	63025	63190	ID=peak_1705	wt2_32_S51442,wt2_H2O2_30_S51455,wt3_33_S51443,wt3_H2O2_31_S51454,wt4_H2O2_39_S51445
Ca22chr2A_C_albicans_SC5314	macs2	peak	66998	67096	ID=peak_1706	wt4_38_S51444
Ca22chr2A_C_albicans_SC5314	macs2	peak	68372	68577	ID=peak_1707	wt2_32_S51442,wt2_H2O2_30_S51455,wt3_33_S51443,wt3_H2O2_31_S51454,wt4_H2O2_39_S51445
Ca22chr2A_C_albicans_SC5314	macs2	peak	70450	70600	ID=peak_1708	wt2_32_S51442,wt2_H2O2_30_S51455,wt3_33_S51443,wt3_H2O2_31_S51454
Ca22chr2A_C_albicans_SC5314	macs2	peak	75002	75306	ID=peak_1709	wt2_H2O2_30_S51455,wt3_H2O2_31_S51454,wt4_38_S51444,wt4_H2O2_39_S51445
Ca22chr2A_C_albicans_SC5314	macs2	peak	75348	75522	ID=peak_1710	wt2_32_S51442,wt3_33_S51443
Ca22chr2A_C_albicans_SC5314	macs2	peak	77696	77871	ID=peak_1711	wt2_32_S51442,wt2_H2O2_30_S51455,wt3_33_S51443,wt3_H2O2_31_S51454,wt4_H2O2_39_S51445
Ca22chr2A_C_albicans_SC5314	macs2	peak	80445	80605	ID=peak_1712	wt4_38_S51444
Ca22chr2A_C_albicans_SC5314	macs2	peak	80680	80806	ID=peak_1713	wt2_32_S51442,wt2_H2O2_30_S51455,wt3_33_S51443,wt3_H2O2_31_S51454,wt4_38_S51444
Ca22chr2A_C_albicans_SC5314	macs2	peak	81998	82142	ID=peak_1714	wt2_32_S51442,wt2_H2O2_30_S51455,wt3_33_S51443,wt3_H2O2_31_S51454,wt4_H2O2_39_S51445
Ca22chr2A_C_albicans_SC5314	macs2	peak	82419	82493	ID=peak_1715	wt2_H2O2_30_S51455
Ca22chr2A_C_albicans_SC5314	macs2	peak	83970	84091	ID=peak_1716	wt4_38_S51444
Ca22chr2A_C_albicans_SC5314	macs2	peak	84366	84733	ID=peak_1717	wt2_32_S51442,wt2_H2O2_30_S51455,wt3_33_S51443,wt3_H2O2_31_S51454,wt4_H2O2_39_S51445
Ca22chr2A_C_albicans_SC5314	macs2	peak	89458	89531	ID=peak_1718	wt2_32_S51442
Ca22chr2A_C_albicans_SC5314	macs2	peak	90401	90564	ID=peak_1719	wt2_32_S51442,wt2_H2O2_30_S51455,wt3_33_S51443,wt3_H2O2_31_S51454
Ca22chr2A_C_albicans_SC5314	macs2	peak	94203	94367	ID=peak_1720	wt2_32_S51442,wt2_H2O2_30_S51455,wt3_H2O2_31_S51454
Ca22chr2A_C_albicans_SC5314	macs2	peak	94949	95065	ID=peak_1721	wt2_32_S51442,wt2_H2O2_30_S51455,wt3_33_S51443,wt3_H2O2_31_S51454
Ca22chr2A_C_albicans_SC5314	macs2	peak	97598	97768	ID=peak_1722	wt2_32_S51442,wt2_H2O2_30_S51455,wt3_33_S51443,wt3_H2O2_31_S51454,wt4_H2O2_39_S51445
Ca22chr2A_C_albicans_SC5314	macs2	peak	98450	98639	ID=peak_1723	wt2_32_S51442,wt2_H2O2_30_S51455,wt3_33_S51443,wt3_H2O2_31_S51454,wt4_38_S51444,wt4_H2O2_39_S51445
Ca22chr2A_C_albicans_SC5314	macs2	peak	100791	100950	ID=peak_1724	wt2_32_S51442,wt2_H2O2_30_S51455,wt3_33_S51443,wt3_H2O2_31_S51454,wt4_H2O2_39_S51445
Ca22chr2A_C_albicans_SC5314	macs2	peak	104879	105033	ID=peak_1725	wt2_32_S51442,wt2_H2O2_30_S51455,wt3_H2O2_31_S51454
Ca22chr2A_C_albicans_SC5314	macs2	peak	110490	110693	ID=peak_1726	wt2_32_S51442,wt2_H2O2_30_S51455,wt3_33_S51443,wt3_H2O2_31_S51454,wt4_38_S51444,wt4_H2O2_39_S51445
Ca22chr2A_C_albicans_SC5314	macs2	peak	112409	112526	ID=peak_1727	wt2_H2O2_30_S51455,wt3_H2O2_31_S51454
Ca22chr2A_C_albicans_SC5314	macs2	peak	113450	113582	ID=peak_1728	wt2_32_S51442,wt2_H2O2_30_S51455,wt3_33_S51443,wt3_H2O2_31_S51454,wt4_H2O2_39_S51445
Ca22chr2A_C_albicans_SC5314	macs2	peak	116520	116695	ID=peak_1729	wt2_32_S51442,wt2_H2O2_30_S51455,wt3_33_S51443,wt3_H2O2_31_S51454
Ca22chr2A_C_albicans_SC5314	macs2	peak	123054	123198	ID=peak_1730	wt2_32_S51442,wt2_H2O2_30_S51455,wt3_33_S51443,wt3_H2O2_31_S51454
Ca22chr2A_C_albicans_SC5314	macs2	peak	123347	123599	ID=peak_1731	wt2_32_S51442,wt2_H2O2_30_S51455,wt3_33_S51443,wt3_H2O2_31_S51454,wt4_H2O2_39_S51445
Ca22chr2A_C_albicans_SC5314	macs2	peak	124667	124788	ID=peak_1732	wt4_38_S51444
Ca22chr2A_C_albicans_SC5314	macs2	peak	126981	127100	ID=peak_1733	wt2_32_S51442,wt2_H2O2_30_S51455,wt3_33_S51443,wt3_H2O2_31_S51454,wt4_H2O2_39_S51445
Ca22chr2A_C_albicans_SC5314	macs2	peak	128825	129116	ID=peak_1734	wt2_32_S51442,wt2_H2O2_30_S51455,wt3_33_S51443,wt3_H2O2_31_S51454,wt4_H2O2_39_S51445
Ca22chr2A_C_albicans_SC5314	macs2	peak	129747	129877	ID=peak_1735	wt2_32_S51442,wt2_H2O2_30_S51455,wt3_H2O2_31_S51454
Ca22chr2A_C_albicans_SC5314	macs2	peak	131595	131793	ID=peak_1736	wt2_32_S51442,wt2_H2O2_30_S51455,wt3_33_S51443,wt3_H2O2_31_S51454,wt4_38_S51444,wt4_H2O2_39_S51445
Ca22chr2A_C_albicans_SC5314	macs2	peak	131948	132138	ID=peak_1737	wt2_32_S51442,wt2_H2O2_30_S51455,wt3_33_S51443,wt3_H2O2_31_S51454,wt4_H2O2_39_S51445
Ca22chr2A_C_albicans_SC5314	macs2	peak	132931	133054	ID=peak_1738	wt2_32_S51442,wt2_H2O2_30_S51455,wt3_33_S51443,wt3_H2O2_31_S51454
Ca22chr2A_C_albicans_SC5314	macs2	peak	134252	134341	ID=peak_1739	wt4_38_S51444
Ca22chr2A_C_albicans_SC5314	macs2	peak	135930	136062	ID=peak_1740	wt2_32_S51442,wt2_H2O2_30_S51455,wt3_33_S51443,wt3_H2O2_31_S51454
Ca22chr2A_C_albicans_SC5314	macs2	peak	142487	142662	ID=peak_1741	wt2_32_S51442,wt2_H2O2_30_S51455,wt3_33_S51443,wt3_H2O2_31_S51454
Ca22chr2A_C_albicans_SC5314	macs2	peak	144604	144725	ID=peak_1742	wt2_32_S51442,wt3_33_S51443,wt3_H2O2_31_S51454
Ca22chr2A_C_albicans_SC5314	macs2	peak	147492	147673	ID=peak_1743	wt2_32_S51442,wt2_H2O2_30_S51455,wt3_33_S51443,wt3_H2O2_31_S51454,wt4_38_S51444,wt4_H2O2_39_S51445
Ca22chr2A_C_albicans_SC5314	macs2	peak	147804	147890	ID=peak_1744	wt4_H2O2_39_S51445
Ca22chr2A_C_albicans_SC5314	macs2	peak	148209	148427	ID=peak_1745	wt2_32_S51442,wt2_H2O2_30_S51455,wt3_33_S51443,wt3_H2O2_31_S51454,wt4_38_S51444,wt4_H2O2_39_S51445
Ca22chr2A_C_albicans_SC5314	macs2	peak	155300	155658	ID=peak_1746	wt2_32_S51442,wt2_H2O2_30_S51455,wt3_33_S51443,wt3_H2O2_31_S51454,wt4_38_S51444,wt4_H2O2_39_S51445
Ca22chr2A_C_albicans_SC5314	macs2	peak	156152	156283	ID=peak_1747	wt3_33_S51443,wt3_H2O2_31_S51454,wt4_38_S51444,wt4_H2O2_39_S51445
Ca22chr2A_C_albicans_SC5314	macs2	peak	157338	157415	ID=peak_1748	wt4_38_S51444,wt4_H2O2_39_S51445
Ca22chr2A_C_albicans_SC5314	macs2	peak	157462	157551	ID=peak_1749	wt3_H2O2_31_S51454
Ca22chr2A_C_albicans_SC5314	macs2	peak	158460	158742	ID=peak_1750	wt2_32_S51442,wt2_H2O2_30_S51455,wt3_33_S51443,wt3_H2O2_31_S51454,wt4_H2O2_39_S51445
Ca22chr2A_C_albicans_SC5314	macs2	peak	159284	159371	ID=peak_1751	wt4_H2O2_39_S51445
Ca22chr2A_C_albicans_SC5314	macs2	peak	159984	160068	ID=peak_1752	wt4_38_S51444
Ca22chr2A_C_albicans_SC5314	macs2	peak	160893	161591	ID=peak_1753	wt2_32_S51442,wt2_H2O2_30_S51455,wt3_33_S51443,wt3_H2O2_31_S51454,wt4_38_S51444,wt4_H2O2_39_S51445
Ca22chr2A_C_albicans_SC5314	macs2	peak	161891	162061	ID=peak_1754	wt2_32_S51442,wt2_H2O2_30_S51455,wt3_H2O2_31_S51454,wt4_H2O2_39_S51445
Ca22chr2A_C_albicans_SC5314	macs2	peak	162133	166128	ID=peak_1755	wt2_32_S51442,wt2_H2O2_30_S51455,wt3_33_S51443,wt3_H2O2_31_S51454,wt4_38_S51444,wt4_H2O2_39_S51445
Ca22chr2A_C_albicans_SC5314	macs2	peak	166255	167201	ID=peak_1756	wt2_32_S51442,wt2_H2O2_30_S51455,wt3_33_S51443,wt3_H2O2_31_S51454,wt4_38_S51444,wt4_H2O2_39_S51445
Ca22chr2A_C_albicans_SC5314	macs2	peak	167377	167493	ID=peak_1757	wt4_H2O2_39_S51445
Ca22chr2A_C_albicans_SC5314	macs2	peak	167608	167751	ID=peak_1758	wt2_32_S51442,wt4_38_S51444
Ca22chr2A_C_albicans_SC5314	macs2	peak	167819	167926	ID=peak_1759	wt4_38_S51444
Ca22chr2A_C_albicans_SC5314	macs2	peak	168140	168211	ID=peak_1760	wt4_H2O2_39_S51445
Ca22chr2A_C_albicans_SC5314	macs2	peak	168539	168681	ID=peak_1761	wt2_H2O2_30_S51455,wt3_H2O2_31_S51454,wt4_38_S51444,wt4_H2O2_39_S51445
Ca22chr2A_C_albicans_SC5314	macs2	peak	168831	168937	ID=peak_1762	wt4_H2O2_39_S51445
Ca22chr2A_C_albicans_SC5314	macs2	peak	169119	169633	ID=peak_1763	wt2_32_S51442,wt2_H2O2_30_S51455,wt3_33_S51443,wt3_H2O2_31_S51454,wt4_38_S51444,wt4_H2O2_39_S51445
Ca22chr2A_C_albicans_SC5314	macs2	peak	169841	170060	ID=peak_1764	wt2_32_S51442,wt2_H2O2_30_S51455,wt3_H2O2_31_S51454,wt4_H2O2_39_S51445
Ca22chr2A_C_albicans_SC5314	macs2	peak	171416	171569	ID=peak_1765	wt4_38_S51444,wt4_H2O2_39_S51445
Ca22chr2A_C_albicans_SC5314	macs2	peak	172134	172302	ID=peak_1766	wt2_32_S51442,wt2_H2O2_30_S51455,wt3_33_S51443,wt3_H2O2_31_S51454,wt4_H2O2_39_S51445
Ca22chr2A_C_albicans_SC5314	macs2	peak	174432	174534	ID=peak_1767	wt2_32_S51442,wt3_H2O2_31_S51454
Ca22chr2A_C_albicans_SC5314	macs2	peak	174567	174649	ID=peak_1768	wt4_38_S51444
Ca22chr2A_C_albicans_SC5314	macs2	peak	175596	176074	ID=peak_1769	wt2_32_S51442,wt2_H2O2_30_S51455,wt3_33_S51443,wt3_H2O2_31_S51454,wt4_38_S51444,wt4_H2O2_39_S51445
Ca22chr2A_C_albicans_SC5314	macs2	peak	177149	177331	ID=peak_1770	wt2_32_S51442,wt2_H2O2_30_S51455,wt3_33_S51443,wt3_H2O2_31_S51454,wt4_H2O2_39_S51445
Ca22chr2A_C_albicans_SC5314	macs2	peak	177725	178181	ID=peak_1771	wt2_32_S51442,wt2_H2O2_30_S51455,wt3_33_S51443,wt3_H2O2_31_S51454,wt4_38_S51444,wt4_H2O2_39_S51445
Ca22chr2A_C_albicans_SC5314	macs2	peak	179687	179881	ID=peak_1772	wt2_32_S51442,wt2_H2O2_30_S51455,wt3_33_S51443,wt3_H2O2_31_S51454,wt4_38_S51444,wt4_H2O2_39_S51445
Ca22chr2A_C_albicans_SC5314	macs2	peak	180233	180628	ID=peak_1773	wt2_32_S51442,wt2_H2O2_30_S51455,wt3_33_S51443,wt3_H2O2_31_S51454,wt4_38_S51444,wt4_H2O2_39_S51445
Ca22chr2A_C_albicans_SC5314	macs2	peak	182222	182335	ID=peak_1774	wt4_H2O2_39_S51445
Ca22chr2A_C_albicans_SC5314	macs2	peak	182973	183250	ID=peak_1775	wt2_32_S51442,wt2_H2O2_30_S51455,wt3_33_S51443,wt3_H2O2_31_S51454,wt4_38_S51444,wt4_H2O2_39_S51445
Ca22chr2A_C_albicans_SC5314	macs2	peak	186460	186589	ID=peak_1776	wt2_32_S51442,wt2_H2O2_30_S51455,wt3_33_S51443,wt3_H2O2_31_S51454,wt4_H2O2_39_S51445
Ca22chr2A_C_albicans_SC5314	macs2	peak	193032	193226	ID=peak_1777	wt2_32_S51442,wt2_H2O2_30_S51455,wt3_33_S51443,wt3_H2O2_31_S51454
Ca22chr2A_C_albicans_SC5314	macs2	peak	194833	195095	ID=peak_1778	wt2_32_S51442,wt2_H2O2_30_S51455,wt3_33_S51443,wt3_H2O2_31_S51454,wt4_38_S51444,wt4_H2O2_39_S51445
Ca22chr2A_C_albicans_SC5314	macs2	peak	198941	199204	ID=peak_1779	wt2_32_S51442,wt2_H2O2_30_S51455,wt3_33_S51443,wt3_H2O2_31_S51454,wt4_38_S51444,wt4_H2O2_39_S51445
Ca22chr2A_C_albicans_SC5314	macs2	peak	199360	199534	ID=peak_1780	wt2_32_S51442,wt3_H2O2_31_S51454
Ca22chr2A_C_albicans_SC5314	macs2	peak	199626	199727	ID=peak_1781	wt2_32_S51442
Ca22chr2A_C_albicans_SC5314	macs2	peak	199814	200186	ID=peak_1782	wt2_32_S51442,wt2_H2O2_30_S51455,wt3_33_S51443,wt3_H2O2_31_S51454,wt4_38_S51444,wt4_H2O2_39_S51445
Ca22chr2A_C_albicans_SC5314	macs2	peak	200195	200617	ID=peak_1783	wt2_32_S51442,wt2_H2O2_30_S51455,wt3_33_S51443,wt3_H2O2_31_S51454
Ca22chr2A_C_albicans_SC5314	macs2	peak	200748	201054	ID=peak_1784	wt2_32_S51442,wt2_H2O2_30_S51455,wt3_33_S51443,wt3_H2O2_31_S51454,wt4_38_S51444,wt4_H2O2_39_S51445
Ca22chr2A_C_albicans_SC5314	macs2	peak	203269	203514	ID=peak_1785	wt2_32_S51442,wt2_H2O2_30_S51455,wt3_33_S51443,wt3_H2O2_31_S51454,wt4_38_S51444,wt4_H2O2_39_S51445
Ca22chr2A_C_albicans_SC5314	macs2	peak	203834	204358	ID=peak_1786	wt2_32_S51442,wt2_H2O2_30_S51455,wt3_33_S51443,wt3_H2O2_31_S51454,wt4_H2O2_39_S51445
Ca22chr2A_C_albicans_SC5314	macs2	peak	204610	204862	ID=peak_1787	wt2_32_S51442,wt2_H2O2_30_S51455,wt3_33_S51443,wt3_H2O2_31_S51454,wt4_38_S51444,wt4_H2O2_39_S51445
Ca22chr2A_C_albicans_SC5314	macs2	peak	211332	211497	ID=peak_1788	wt2_32_S51442,wt2_H2O2_30_S51455,wt3_33_S51443,wt3_H2O2_31_S51454,wt4_H2O2_39_S51445
Ca22chr2A_C_albicans_SC5314	macs2	peak	214653	215434	ID=peak_1789	wt2_32_S51442,wt2_H2O2_30_S51455,wt3_33_S51443,wt3_H2O2_31_S51454,wt4_38_S51444,wt4_H2O2_39_S51445
Ca22chr2A_C_albicans_SC5314	macs2	peak	216733	216936	ID=peak_1790	wt2_32_S51442,wt2_H2O2_30_S51455,wt3_33_S51443,wt3_H2O2_31_S51454,wt4_38_S51444
Ca22chr2A_C_albicans_SC5314	macs2	peak	216991	217075	ID=peak_1791	wt3_H2O2_31_S51454,wt4_H2O2_39_S51445
Ca22chr2A_C_albicans_SC5314	macs2	peak	218902	219059	ID=peak_1792	wt2_32_S51442,wt2_H2O2_30_S51455,wt3_H2O2_31_S51454
Ca22chr2A_C_albicans_SC5314	macs2	peak	221708	221983	ID=peak_1793	wt2_32_S51442,wt2_H2O2_30_S51455,wt3_33_S51443,wt3_H2O2_31_S51454,wt4_38_S51444,wt4_H2O2_39_S51445
Ca22chr2A_C_albicans_SC5314	macs2	peak	222100	222318	ID=peak_1794	wt2_32_S51442,wt2_H2O2_30_S51455,wt3_33_S51443,wt3_H2O2_31_S51454,wt4_H2O2_39_S51445
Ca22chr2A_C_albicans_SC5314	macs2	peak	222462	222553	ID=peak_1795	wt2_H2O2_30_S51455
Ca22chr2A_C_albicans_SC5314	macs2	peak	223070	223412	ID=peak_1796	wt2_32_S51442,wt2_H2O2_30_S51455,wt3_33_S51443,wt3_H2O2_31_S51454,wt4_38_S51444,wt4_H2O2_39_S51445
Ca22chr2A_C_albicans_SC5314	macs2	peak	225792	225929	ID=peak_1797	wt2_32_S51442,wt2_H2O2_30_S51455,wt3_H2O2_31_S51454
Ca22chr2A_C_albicans_SC5314	macs2	peak	229259	229727	ID=peak_1798	wt2_32_S51442,wt2_H2O2_30_S51455,wt3_33_S51443,wt3_H2O2_31_S51454,wt4_38_S51444,wt4_H2O2_39_S51445
Ca22chr2A_C_albicans_SC5314	macs2	peak	230163	230362	ID=peak_1799	wt2_32_S51442,wt2_H2O2_30_S51455,wt3_33_S51443,wt3_H2O2_31_S51454,wt4_38_S51444,wt4_H2O2_39_S51445
Ca22chr2A_C_albicans_SC5314	macs2	peak	234686	234778	ID=peak_1800	wt2_32_S51442,wt2_H2O2_30_S51455,wt3_33_S51443,wt3_H2O2_31_S51454
Ca22chr2A_C_albicans_SC5314	macs2	peak	236453	237079	ID=peak_1801	wt2_32_S51442,wt2_H2O2_30_S51455,wt3_33_S51443,wt3_H2O2_31_S51454,wt4_38_S51444,wt4_H2O2_39_S51445
Ca22chr2A_C_albicans_SC5314	macs2	peak	239192	239283	ID=peak_1802	wt2_H2O2_30_S51455
Ca22chr2A_C_albicans_SC5314	macs2	peak	239826	239952	ID=peak_1803	wt2_32_S51442,wt3_33_S51443,wt3_H2O2_31_S51454
Ca22chr2A_C_albicans_SC5314	macs2	peak	240219	240538	ID=peak_1804	wt2_32_S51442,wt2_H2O2_30_S51455,wt3_33_S51443,wt3_H2O2_31_S51454,wt4_38_S51444,wt4_H2O2_39_S51445
Ca22chr2A_C_albicans_SC5314	macs2	peak	240629	240887	ID=peak_1805	wt2_32_S51442,wt2_H2O2_30_S51455,wt3_33_S51443,wt3_H2O2_31_S51454
Ca22chr2A_C_albicans_SC5314	macs2	peak	243642	243830	ID=peak_1806	wt2_32_S51442,wt2_H2O2_30_S51455,wt3_33_S51443,wt3_H2O2_31_S51454,wt4_38_S51444,wt4_H2O2_39_S51445
Ca22chr2A_C_albicans_SC5314	macs2	peak	250814	253314	ID=peak_1807	wt2_32_S51442,wt2_H2O2_30_S51455,wt3_33_S51443,wt3_H2O2_31_S51454,wt4_38_S51444,wt4_H2O2_39_S51445
Ca22chr2A_C_albicans_SC5314	macs2	peak	253428	253639	ID=peak_1808	wt2_32_S51442,wt2_H2O2_30_S51455,wt3_33_S51443,wt3_H2O2_31_S51454
Ca22chr2A_C_albicans_SC5314	macs2	peak	256417	256664	ID=peak_1809	wt2_32_S51442,wt2_H2O2_30_S51455,wt3_33_S51443,wt3_H2O2_31_S51454,wt4_38_S51444,wt4_H2O2_39_S51445
Ca22chr2A_C_albicans_SC5314	macs2	peak	258857	258997	ID=peak_1810	wt2_32_S51442,wt2_H2O2_30_S51455,wt3_33_S51443
Ca22chr2A_C_albicans_SC5314	macs2	peak	260518	260674	ID=peak_1811	wt2_32_S51442,wt2_H2O2_30_S51455,wt3_33_S51443,wt3_H2O2_31_S51454,wt4_38_S51444
Ca22chr2A_C_albicans_SC5314	macs2	peak	271533	271646	ID=peak_1812	wt2_32_S51442,wt2_H2O2_30_S51455,wt3_33_S51443,wt3_H2O2_31_S51454
Ca22chr2A_C_albicans_SC5314	macs2	peak	275049	275140	ID=peak_1813	wt2_32_S51442,wt2_H2O2_30_S51455,wt3_33_S51443
Ca22chr2A_C_albicans_SC5314	macs2	peak	275266	275440	ID=peak_1814	wt2_32_S51442,wt2_H2O2_30_S51455,wt3_33_S51443,wt3_H2O2_31_S51454,wt4_38_S51444,wt4_H2O2_39_S51445
Ca22chr2A_C_albicans_SC5314	macs2	peak	276775	276984	ID=peak_1815	wt2_32_S51442,wt2_H2O2_30_S51455,wt3_33_S51443,wt3_H2O2_31_S51454,wt4_38_S51444,wt4_H2O2_39_S51445
Ca22chr2A_C_albicans_SC5314	macs2	peak	279434	279504	ID=peak_1816	wt2_32_S51442
Ca22chr2A_C_albicans_SC5314	macs2	peak	279601	279827	ID=peak_1817	wt2_32_S51442,wt2_H2O2_30_S51455,wt3_33_S51443,wt3_H2O2_31_S51454,wt4_38_S51444,wt4_H2O2_39_S51445
Ca22chr2A_C_albicans_SC5314	macs2	peak	282829	282977	ID=peak_1818	wt4_38_S51444
Ca22chr2A_C_albicans_SC5314	macs2	peak	283886	284166	ID=peak_1819	wt2_32_S51442,wt2_H2O2_30_S51455,wt3_33_S51443,wt3_H2O2_31_S51454,wt4_38_S51444,wt4_H2O2_39_S51445
Ca22chr2A_C_albicans_SC5314	macs2	peak	286949	287356	ID=peak_1820	wt2_32_S51442,wt2_H2O2_30_S51455,wt3_33_S51443,wt3_H2O2_31_S51454,wt4_38_S51444,wt4_H2O2_39_S51445
Ca22chr2A_C_albicans_SC5314	macs2	peak	287424	287580	ID=peak_1821	wt2_32_S51442,wt3_H2O2_31_S51454
Ca22chr2A_C_albicans_SC5314	macs2	peak	288617	288931	ID=peak_1822	wt2_32_S51442,wt2_H2O2_30_S51455,wt3_33_S51443,wt3_H2O2_31_S51454,wt4_38_S51444,wt4_H2O2_39_S51445
Ca22chr2A_C_albicans_SC5314	macs2	peak	289193	289446	ID=peak_1823	wt2_32_S51442,wt2_H2O2_30_S51455,wt3_33_S51443,wt3_H2O2_31_S51454,wt4_38_S51444,wt4_H2O2_39_S51445
Ca22chr2A_C_albicans_SC5314	macs2	peak	290781	290956	ID=peak_1824	wt2_32_S51442,wt2_H2O2_30_S51455,wt3_33_S51443,wt3_H2O2_31_S51454,wt4_H2O2_39_S51445
Ca22chr2A_C_albicans_SC5314	macs2	peak	292208	292400	ID=peak_1825	wt2_32_S51442,wt2_H2O2_30_S51455,wt3_33_S51443,wt3_H2O2_31_S51454,wt4_H2O2_39_S51445
Ca22chr2A_C_albicans_SC5314	macs2	peak	301523	301649	ID=peak_1826	wt2_32_S51442,wt2_H2O2_30_S51455,wt3_33_S51443
Ca22chr2A_C_albicans_SC5314	macs2	peak	304468	304586	ID=peak_1827	wt2_32_S51442,wt2_H2O2_30_S51455,wt3_H2O2_31_S51454
Ca22chr2A_C_albicans_SC5314	macs2	peak	304756	305555	ID=peak_1828	wt2_32_S51442,wt2_H2O2_30_S51455,wt3_33_S51443,wt3_H2O2_31_S51454,wt4_38_S51444,wt4_H2O2_39_S51445
Ca22chr2A_C_albicans_SC5314	macs2	peak	308972	309131	ID=peak_1829	wt2_32_S51442,wt2_H2O2_30_S51455,wt3_33_S51443,wt3_H2O2_31_S51454,wt4_H2O2_39_S51445
Ca22chr2A_C_albicans_SC5314	macs2	peak	309265	309668	ID=peak_1830	wt2_32_S51442,wt2_H2O2_30_S51455,wt3_33_S51443,wt3_H2O2_31_S51454,wt4_38_S51444,wt4_H2O2_39_S51445
Ca22chr2A_C_albicans_SC5314	macs2	peak	310606	310808	ID=peak_1831	wt2_32_S51442,wt2_H2O2_30_S51455,wt3_33_S51443,wt3_H2O2_31_S51454,wt4_38_S51444,wt4_H2O2_39_S51445
Ca22chr2A_C_albicans_SC5314	macs2	peak	313493	313796	ID=peak_1832	wt2_32_S51442,wt2_H2O2_30_S51455,wt3_33_S51443,wt3_H2O2_31_S51454,wt4_38_S51444,wt4_H2O2_39_S51445
Ca22chr2A_C_albicans_SC5314	macs2	peak	314060	314194	ID=peak_1833	wt2_32_S51442,wt2_H2O2_30_S51455,wt3_33_S51443,wt3_H2O2_31_S51454,wt4_38_S51444,wt4_H2O2_39_S51445
Ca22chr2A_C_albicans_SC5314	macs2	peak	314933	315125	ID=peak_1834	wt4_38_S51444,wt4_H2O2_39_S51445
Ca22chr2A_C_albicans_SC5314	macs2	peak	315523	316181	ID=peak_1835	wt2_32_S51442,wt2_H2O2_30_S51455,wt3_33_S51443,wt3_H2O2_31_S51454,wt4_38_S51444,wt4_H2O2_39_S51445
Ca22chr2A_C_albicans_SC5314	macs2	peak	316199	316437	ID=peak_1836	wt2_32_S51442,wt2_H2O2_30_S51455,wt3_33_S51443,wt3_H2O2_31_S51454,wt4_38_S51444,wt4_H2O2_39_S51445
Ca22chr2A_C_albicans_SC5314	macs2	peak	316622	316895	ID=peak_1837	wt2_32_S51442,wt2_H2O2_30_S51455,wt3_33_S51443,wt3_H2O2_31_S51454,wt4_38_S51444,wt4_H2O2_39_S51445
Ca22chr2A_C_albicans_SC5314	macs2	peak	316927	317168	ID=peak_1838	wt2_32_S51442,wt2_H2O2_30_S51455,wt3_33_S51443,wt3_H2O2_31_S51454,wt4_38_S51444
Ca22chr2A_C_albicans_SC5314	macs2	peak	317349	317566	ID=peak_1839	wt2_32_S51442,wt2_H2O2_30_S51455,wt3_33_S51443,wt3_H2O2_31_S51454
Ca22chr2A_C_albicans_SC5314	macs2	peak	317795	317938	ID=peak_1840	wt2_32_S51442,wt3_33_S51443
Ca22chr2A_C_albicans_SC5314	macs2	peak	318092	318176	ID=peak_1841	wt2_32_S51442,wt2_H2O2_30_S51455,wt3_H2O2_31_S51454
Ca22chr2A_C_albicans_SC5314	macs2	peak	318804	318983	ID=peak_1842	wt2_32_S51442,wt2_H2O2_30_S51455
Ca22chr2A_C_albicans_SC5314	macs2	peak	319310	319421	ID=peak_1843	wt4_38_S51444
Ca22chr2A_C_albicans_SC5314	macs2	peak	320104	320552	ID=peak_1844	wt2_32_S51442,wt2_H2O2_30_S51455,wt3_33_S51443,wt3_H2O2_31_S51454,wt4_H2O2_39_S51445
Ca22chr2A_C_albicans_SC5314	macs2	peak	320955	321063	ID=peak_1845	wt3_33_S51443
Ca22chr2A_C_albicans_SC5314	macs2	peak	323143	323527	ID=peak_1846	wt2_32_S51442,wt2_H2O2_30_S51455,wt3_33_S51443,wt3_H2O2_31_S51454,wt4_38_S51444,wt4_H2O2_39_S51445
Ca22chr2A_C_albicans_SC5314	macs2	peak	324326	324680	ID=peak_1847	wt2_32_S51442,wt2_H2O2_30_S51455,wt3_33_S51443,wt3_H2O2_31_S51454,wt4_38_S51444,wt4_H2O2_39_S51445
Ca22chr2A_C_albicans_SC5314	macs2	peak	325778	326072	ID=peak_1848	wt2_32_S51442,wt2_H2O2_30_S51455,wt3_33_S51443,wt3_H2O2_31_S51454,wt4_38_S51444,wt4_H2O2_39_S51445
Ca22chr2A_C_albicans_SC5314	macs2	peak	326381	326609	ID=peak_1849	wt2_32_S51442,wt2_H2O2_30_S51455,wt3_33_S51443,wt3_H2O2_31_S51454,wt4_38_S51444,wt4_H2O2_39_S51445
Ca22chr2A_C_albicans_SC5314	macs2	peak	328142	328266	ID=peak_1850	wt4_38_S51444
Ca22chr2A_C_albicans_SC5314	macs2	peak	328579	328748	ID=peak_1851	wt4_38_S51444
Ca22chr2A_C_albicans_SC5314	macs2	peak	340584	340743	ID=peak_1852	wt2_32_S51442,wt2_H2O2_30_S51455,wt3_H2O2_31_S51454
Ca22chr2A_C_albicans_SC5314	macs2	peak	340889	341004	ID=peak_1853	wt2_32_S51442,wt2_H2O2_30_S51455,wt3_33_S51443,wt3_H2O2_31_S51454,wt4_38_S51444,wt4_H2O2_39_S51445
Ca22chr2A_C_albicans_SC5314	macs2	peak	347323	347450	ID=peak_1854	wt2_32_S51442,wt3_33_S51443,wt4_H2O2_39_S51445
Ca22chr2A_C_albicans_SC5314	macs2	peak	348738	348884	ID=peak_1855	wt2_32_S51442,wt2_H2O2_30_S51455,wt3_33_S51443,wt3_H2O2_31_S51454,wt4_38_S51444,wt4_H2O2_39_S51445
Ca22chr2A_C_albicans_SC5314	macs2	peak	349283	349721	ID=peak_1856	wt2_32_S51442,wt2_H2O2_30_S51455,wt3_33_S51443,wt3_H2O2_31_S51454,wt4_38_S51444,wt4_H2O2_39_S51445
Ca22chr2A_C_albicans_SC5314	macs2	peak	355882	355985	ID=peak_1857	wt2_32_S51442,wt2_H2O2_30_S51455,wt3_33_S51443,wt3_H2O2_31_S51454
Ca22chr2A_C_albicans_SC5314	macs2	peak	360032	360148	ID=peak_1858	wt2_32_S51442,wt2_H2O2_30_S51455,wt3_33_S51443,wt3_H2O2_31_S51454
Ca22chr2A_C_albicans_SC5314	macs2	peak	360380	360704	ID=peak_1859	wt2_32_S51442,wt2_H2O2_30_S51455,wt3_33_S51443,wt3_H2O2_31_S51454,wt4_38_S51444,wt4_H2O2_39_S51445
Ca22chr2A_C_albicans_SC5314	macs2	peak	361915	362013	ID=peak_1860	wt3_H2O2_31_S51454
Ca22chr2A_C_albicans_SC5314	macs2	peak	362170	364405	ID=peak_1861	wt2_32_S51442,wt2_H2O2_30_S51455,wt3_33_S51443,wt3_H2O2_31_S51454,wt4_38_S51444,wt4_H2O2_39_S51445
Ca22chr2A_C_albicans_SC5314	macs2	peak	364833	364916	ID=peak_1862	wt2_H2O2_30_S51455
Ca22chr2A_C_albicans_SC5314	macs2	peak	367923	368170	ID=peak_1863	wt2_32_S51442,wt2_H2O2_30_S51455,wt3_33_S51443,wt3_H2O2_31_S51454,wt4_38_S51444,wt4_H2O2_39_S51445
Ca22chr2A_C_albicans_SC5314	macs2	peak	368269	368565	ID=peak_1864	wt2_32_S51442,wt2_H2O2_30_S51455,wt3_33_S51443,wt3_H2O2_31_S51454,wt4_38_S51444,wt4_H2O2_39_S51445
Ca22chr2A_C_albicans_SC5314	macs2	peak	369483	369638	ID=peak_1865	wt2_32_S51442,wt2_H2O2_30_S51455,wt3_33_S51443,wt3_H2O2_31_S51454
Ca22chr2A_C_albicans_SC5314	macs2	peak	372918	373318	ID=peak_1866	wt2_32_S51442,wt2_H2O2_30_S51455,wt3_33_S51443,wt3_H2O2_31_S51454,wt4_38_S51444,wt4_H2O2_39_S51445
Ca22chr2A_C_albicans_SC5314	macs2	peak	373409	373674	ID=peak_1867	wt2_32_S51442,wt2_H2O2_30_S51455,wt3_33_S51443,wt3_H2O2_31_S51454,wt4_38_S51444,wt4_H2O2_39_S51445
Ca22chr2A_C_albicans_SC5314	macs2	peak	373863	373982	ID=peak_1868	wt2_32_S51442,wt3_33_S51443
Ca22chr2A_C_albicans_SC5314	macs2	peak	376403	376487	ID=peak_1869	wt2_32_S51442
Ca22chr2A_C_albicans_SC5314	macs2	peak	376775	377432	ID=peak_1870	wt2_32_S51442,wt2_H2O2_30_S51455,wt3_33_S51443,wt3_H2O2_31_S51454,wt4_38_S51444,wt4_H2O2_39_S51445
Ca22chr2A_C_albicans_SC5314	macs2	peak	385922	386026	ID=peak_1871	wt2_32_S51442,wt2_H2O2_30_S51455,wt3_33_S51443,wt3_H2O2_31_S51454,wt4_H2O2_39_S51445
Ca22chr2A_C_albicans_SC5314	macs2	peak	386200	386566	ID=peak_1872	wt2_32_S51442,wt2_H2O2_30_S51455,wt3_33_S51443,wt3_H2O2_31_S51454,wt4_38_S51444,wt4_H2O2_39_S51445
Ca22chr2A_C_albicans_SC5314	macs2	peak	389285	389509	ID=peak_1873	wt2_32_S51442,wt2_H2O2_30_S51455,wt3_33_S51443,wt3_H2O2_31_S51454,wt4_38_S51444,wt4_H2O2_39_S51445
Ca22chr2A_C_albicans_SC5314	macs2	peak	392074	392444	ID=peak_1874	wt2_32_S51442,wt2_H2O2_30_S51455,wt3_33_S51443,wt3_H2O2_31_S51454,wt4_38_S51444,wt4_H2O2_39_S51445
Ca22chr2A_C_albicans_SC5314	macs2	peak	393929	394045	ID=peak_1875	wt2_H2O2_30_S51455,wt3_H2O2_31_S51454
Ca22chr2A_C_albicans_SC5314	macs2	peak	401387	401548	ID=peak_1876	wt2_32_S51442
Ca22chr2A_C_albicans_SC5314	macs2	peak	401892	402058	ID=peak_1877	wt2_32_S51442,wt3_33_S51443
Ca22chr2A_C_albicans_SC5314	macs2	peak	404457	404561	ID=peak_1878	wt2_32_S51442,wt2_H2O2_30_S51455,wt3_33_S51443,wt3_H2O2_31_S51454
Ca22chr2A_C_albicans_SC5314	macs2	peak	407145	407284	ID=peak_1879	wt2_32_S51442,wt2_H2O2_30_S51455,wt3_H2O2_31_S51454
Ca22chr2A_C_albicans_SC5314	macs2	peak	407871	408006	ID=peak_1880	wt2_32_S51442
Ca22chr2A_C_albicans_SC5314	macs2	peak	409546	409793	ID=peak_1881	wt2_32_S51442,wt2_H2O2_30_S51455,wt3_33_S51443,wt3_H2O2_31_S51454,wt4_38_S51444,wt4_H2O2_39_S51445
Ca22chr2A_C_albicans_SC5314	macs2	peak	416051	416121	ID=peak_1882	wt2_H2O2_30_S51455
Ca22chr2A_C_albicans_SC5314	macs2	peak	422161	422314	ID=peak_1883	wt2_32_S51442,wt2_H2O2_30_S51455,wt3_33_S51443,wt3_H2O2_31_S51454,wt4_H2O2_39_S51445
Ca22chr2A_C_albicans_SC5314	macs2	peak	424006	424161	ID=peak_1884	wt2_32_S51442,wt2_H2O2_30_S51455,wt3_33_S51443
Ca22chr2A_C_albicans_SC5314	macs2	peak	426906	427112	ID=peak_1885	wt2_H2O2_30_S51455,wt3_H2O2_31_S51454
Ca22chr2A_C_albicans_SC5314	macs2	peak	430652	430927	ID=peak_1886	wt2_32_S51442,wt2_H2O2_30_S51455,wt3_33_S51443,wt3_H2O2_31_S51454,wt4_38_S51444,wt4_H2O2_39_S51445
Ca22chr2A_C_albicans_SC5314	macs2	peak	431252	431344	ID=peak_1887	wt2_32_S51442,wt2_H2O2_30_S51455
Ca22chr2A_C_albicans_SC5314	macs2	peak	432468	432578	ID=peak_1888	wt2_32_S51442
Ca22chr2A_C_albicans_SC5314	macs2	peak	432743	432836	ID=peak_1889	wt2_32_S51442
Ca22chr2A_C_albicans_SC5314	macs2	peak	436094	436220	ID=peak_1890	wt2_32_S51442,wt2_H2O2_30_S51455,wt3_33_S51443
Ca22chr2A_C_albicans_SC5314	macs2	peak	439128	439261	ID=peak_1891	wt2_32_S51442,wt3_33_S51443
Ca22chr2A_C_albicans_SC5314	macs2	peak	439543	439717	ID=peak_1892	wt2_32_S51442,wt2_H2O2_30_S51455,wt3_33_S51443,wt3_H2O2_31_S51454
Ca22chr2A_C_albicans_SC5314	macs2	peak	447230	447326	ID=peak_1893	wt2_32_S51442,wt2_H2O2_30_S51455,wt3_H2O2_31_S51454
Ca22chr2A_C_albicans_SC5314	macs2	peak	448044	448136	ID=peak_1894	wt2_H2O2_30_S51455
Ca22chr2A_C_albicans_SC5314	macs2	peak	448322	448623	ID=peak_1895	wt2_32_S51442,wt2_H2O2_30_S51455,wt3_33_S51443,wt3_H2O2_31_S51454,wt4_38_S51444,wt4_H2O2_39_S51445
Ca22chr2A_C_albicans_SC5314	macs2	peak	448836	449092	ID=peak_1896	wt2_H2O2_30_S51455,wt3_H2O2_31_S51454
Ca22chr2A_C_albicans_SC5314	macs2	peak	450628	450840	ID=peak_1897	wt2_32_S51442,wt2_H2O2_30_S51455,wt3_33_S51443,wt3_H2O2_31_S51454,wt4_38_S51444,wt4_H2O2_39_S51445
Ca22chr2A_C_albicans_SC5314	macs2	peak	453187	453441	ID=peak_1898	wt2_32_S51442,wt2_H2O2_30_S51455,wt3_33_S51443,wt3_H2O2_31_S51454,wt4_38_S51444,wt4_H2O2_39_S51445
Ca22chr2A_C_albicans_SC5314	macs2	peak	455159	455308	ID=peak_1899	wt2_32_S51442,wt2_H2O2_30_S51455,wt3_33_S51443,wt3_H2O2_31_S51454,wt4_38_S51444
Ca22chr2A_C_albicans_SC5314	macs2	peak	455378	455485	ID=peak_1900	wt2_32_S51442,wt2_H2O2_30_S51455,wt3_33_S51443,wt3_H2O2_31_S51454,wt4_H2O2_39_S51445
Ca22chr2A_C_albicans_SC5314	macs2	peak	456940	457124	ID=peak_1901	wt2_32_S51442,wt2_H2O2_30_S51455,wt3_33_S51443,wt3_H2O2_31_S51454,wt4_38_S51444,wt4_H2O2_39_S51445
Ca22chr2A_C_albicans_SC5314	macs2	peak	458916	458988	ID=peak_1902	wt3_33_S51443
Ca22chr2A_C_albicans_SC5314	macs2	peak	459839	459991	ID=peak_1903	wt2_H2O2_30_S51455,wt3_H2O2_31_S51454
Ca22chr2A_C_albicans_SC5314	macs2	peak	461860	462025	ID=peak_1904	wt2_32_S51442,wt2_H2O2_30_S51455,wt3_33_S51443,wt3_H2O2_31_S51454,wt4_H2O2_39_S51445
Ca22chr2A_C_albicans_SC5314	macs2	peak	464000	464076	ID=peak_1905	wt2_H2O2_30_S51455
Ca22chr2A_C_albicans_SC5314	macs2	peak	470678	470867	ID=peak_1906	wt2_32_S51442,wt2_H2O2_30_S51455,wt3_33_S51443,wt3_H2O2_31_S51454
Ca22chr2A_C_albicans_SC5314	macs2	peak	470936	471084	ID=peak_1907	wt2_32_S51442,wt2_H2O2_30_S51455,wt3_33_S51443,wt3_H2O2_31_S51454
Ca22chr2A_C_albicans_SC5314	macs2	peak	473719	473977	ID=peak_1908	wt2_32_S51442,wt2_H2O2_30_S51455,wt3_H2O2_31_S51454
Ca22chr2A_C_albicans_SC5314	macs2	peak	474047	474306	ID=peak_1909	wt2_32_S51442,wt2_H2O2_30_S51455,wt3_33_S51443,wt3_H2O2_31_S51454,wt4_38_S51444,wt4_H2O2_39_S51445
Ca22chr2A_C_albicans_SC5314	macs2	peak	475970	476069	ID=peak_1910	wt2_32_S51442,wt3_H2O2_31_S51454
Ca22chr2A_C_albicans_SC5314	macs2	peak	476257	476400	ID=peak_1911	wt2_H2O2_30_S51455,wt3_H2O2_31_S51454
Ca22chr2A_C_albicans_SC5314	macs2	peak	478291	478492	ID=peak_1912	wt2_32_S51442,wt2_H2O2_30_S51455,wt3_33_S51443,wt3_H2O2_31_S51454,wt4_38_S51444,wt4_H2O2_39_S51445
Ca22chr2A_C_albicans_SC5314	macs2	peak	484280	484429	ID=peak_1913	wt2_32_S51442,wt2_H2O2_30_S51455,wt3_33_S51443,wt4_H2O2_39_S51445
Ca22chr2A_C_albicans_SC5314	macs2	peak	491470	491743	ID=peak_1914	wt2_32_S51442,wt2_H2O2_30_S51455,wt3_33_S51443,wt3_H2O2_31_S51454
Ca22chr2A_C_albicans_SC5314	macs2	peak	492128	492199	ID=peak_1915	wt4_38_S51444
Ca22chr2A_C_albicans_SC5314	macs2	peak	496051	496252	ID=peak_1916	wt2_32_S51442,wt2_H2O2_30_S51455,wt3_33_S51443,wt3_H2O2_31_S51454,wt4_H2O2_39_S51445
Ca22chr2A_C_albicans_SC5314	macs2	peak	496313	496396	ID=peak_1917	wt2_H2O2_30_S51455
Ca22chr2A_C_albicans_SC5314	macs2	peak	496535	496645	ID=peak_1918	wt2_32_S51442,wt2_H2O2_30_S51455
Ca22chr2A_C_albicans_SC5314	macs2	peak	500953	501042	ID=peak_1919	wt2_32_S51442
Ca22chr2A_C_albicans_SC5314	macs2	peak	502936	503154	ID=peak_1920	wt2_32_S51442,wt2_H2O2_30_S51455,wt3_33_S51443,wt3_H2O2_31_S51454,wt4_38_S51444,wt4_H2O2_39_S51445
Ca22chr2A_C_albicans_SC5314	macs2	peak	509177	509315	ID=peak_1921	wt2_32_S51442,wt2_H2O2_30_S51455,wt3_33_S51443,wt3_H2O2_31_S51454,wt4_H2O2_39_S51445
Ca22chr2A_C_albicans_SC5314	macs2	peak	514873	515053	ID=peak_1922	wt2_32_S51442,wt3_33_S51443,wt4_H2O2_39_S51445
Ca22chr2A_C_albicans_SC5314	macs2	peak	517260	517499	ID=peak_1923	wt2_32_S51442,wt2_H2O2_30_S51455,wt3_33_S51443,wt3_H2O2_31_S51454,wt4_H2O2_39_S51445
Ca22chr2A_C_albicans_SC5314	macs2	peak	520820	521006	ID=peak_1924	wt2_32_S51442,wt2_H2O2_30_S51455,wt3_33_S51443,wt3_H2O2_31_S51454,wt4_38_S51444,wt4_H2O2_39_S51445
Ca22chr2A_C_albicans_SC5314	macs2	peak	521705	521792	ID=peak_1925	wt4_38_S51444
Ca22chr2A_C_albicans_SC5314	macs2	peak	522913	523158	ID=peak_1926	wt2_32_S51442,wt2_H2O2_30_S51455,wt3_33_S51443,wt3_H2O2_31_S51454,wt4_38_S51444,wt4_H2O2_39_S51445
Ca22chr2A_C_albicans_SC5314	macs2	peak	523613	523805	ID=peak_1927	wt2_32_S51442,wt2_H2O2_30_S51455,wt3_33_S51443,wt3_H2O2_31_S51454,wt4_38_S51444
Ca22chr2A_C_albicans_SC5314	macs2	peak	528406	528729	ID=peak_1928	wt2_32_S51442,wt2_H2O2_30_S51455,wt3_33_S51443,wt3_H2O2_31_S51454,wt4_38_S51444,wt4_H2O2_39_S51445
Ca22chr2A_C_albicans_SC5314	macs2	peak	528896	528972	ID=peak_1929	wt2_32_S51442,wt2_H2O2_30_S51455,wt3_H2O2_31_S51454
Ca22chr2A_C_albicans_SC5314	macs2	peak	529654	529749	ID=peak_1930	wt2_H2O2_30_S51455,wt3_H2O2_31_S51454
Ca22chr2A_C_albicans_SC5314	macs2	peak	529885	529981	ID=peak_1931	wt2_32_S51442,wt2_H2O2_30_S51455,wt3_H2O2_31_S51454
Ca22chr2A_C_albicans_SC5314	macs2	peak	536091	536159	ID=peak_1932	wt2_32_S51442
Ca22chr2A_C_albicans_SC5314	macs2	peak	537317	537395	ID=peak_1933	wt2_H2O2_30_S51455
Ca22chr2A_C_albicans_SC5314	macs2	peak	538688	538924	ID=peak_1934	wt2_32_S51442,wt2_H2O2_30_S51455,wt3_33_S51443,wt3_H2O2_31_S51454
Ca22chr2A_C_albicans_SC5314	macs2	peak	540795	540879	ID=peak_1935	wt2_32_S51442
Ca22chr2A_C_albicans_SC5314	macs2	peak	541869	542192	ID=peak_1936	wt2_32_S51442,wt2_H2O2_30_S51455,wt3_33_S51443,wt3_H2O2_31_S51454,wt4_38_S51444,wt4_H2O2_39_S51445
Ca22chr2A_C_albicans_SC5314	macs2	peak	545446	545567	ID=peak_1937	wt2_32_S51442,wt2_H2O2_30_S51455,wt3_33_S51443,wt3_H2O2_31_S51454,wt4_H2O2_39_S51445
Ca22chr2A_C_albicans_SC5314	macs2	peak	547727	547854	ID=peak_1938	wt2_32_S51442,wt2_H2O2_30_S51455,wt3_33_S51443,wt3_H2O2_31_S51454
Ca22chr2A_C_albicans_SC5314	macs2	peak	549998	550207	ID=peak_1939	wt2_32_S51442,wt2_H2O2_30_S51455,wt3_H2O2_31_S51454
Ca22chr2A_C_albicans_SC5314	macs2	peak	553238	553362	ID=peak_1940	wt2_32_S51442,wt2_H2O2_30_S51455,wt3_33_S51443,wt3_H2O2_31_S51454
Ca22chr2A_C_albicans_SC5314	macs2	peak	557276	557361	ID=peak_1941	wt4_38_S51444
Ca22chr2A_C_albicans_SC5314	macs2	peak	562557	562648	ID=peak_1942	wt4_38_S51444
Ca22chr2A_C_albicans_SC5314	macs2	peak	564654	564746	ID=peak_1943	wt2_32_S51442,wt3_33_S51443
Ca22chr2A_C_albicans_SC5314	macs2	peak	568444	568599	ID=peak_1944	wt2_32_S51442,wt2_H2O2_30_S51455,wt3_33_S51443,wt3_H2O2_31_S51454,wt4_38_S51444,wt4_H2O2_39_S51445
Ca22chr2A_C_albicans_SC5314	macs2	peak	571972	572220	ID=peak_1945	wt2_32_S51442,wt2_H2O2_30_S51455,wt3_33_S51443,wt3_H2O2_31_S51454,wt4_38_S51444,wt4_H2O2_39_S51445
Ca22chr2A_C_albicans_SC5314	macs2	peak	572354	572791	ID=peak_1946	wt2_32_S51442,wt2_H2O2_30_S51455,wt3_33_S51443,wt3_H2O2_31_S51454,wt4_38_S51444,wt4_H2O2_39_S51445
Ca22chr2A_C_albicans_SC5314	macs2	peak	574168	574240	ID=peak_1947	wt2_H2O2_30_S51455
Ca22chr2A_C_albicans_SC5314	macs2	peak	576556	576659	ID=peak_1948	wt2_32_S51442,wt2_H2O2_30_S51455,wt3_33_S51443,wt3_H2O2_31_S51454
Ca22chr2A_C_albicans_SC5314	macs2	peak	577489	577573	ID=peak_1949	wt2_32_S51442,wt2_H2O2_30_S51455,wt3_33_S51443
Ca22chr2A_C_albicans_SC5314	macs2	peak	581459	581652	ID=peak_1950	wt2_32_S51442,wt2_H2O2_30_S51455,wt3_33_S51443,wt3_H2O2_31_S51454,wt4_38_S51444,wt4_H2O2_39_S51445
Ca22chr2A_C_albicans_SC5314	macs2	peak	582593	583049	ID=peak_1951	wt2_32_S51442,wt2_H2O2_30_S51455,wt3_33_S51443,wt3_H2O2_31_S51454,wt4_38_S51444,wt4_H2O2_39_S51445
Ca22chr2A_C_albicans_SC5314	macs2	peak	585495	585621	ID=peak_1952	wt2_32_S51442,wt2_H2O2_30_S51455,wt3_33_S51443,wt3_H2O2_31_S51454
Ca22chr2A_C_albicans_SC5314	macs2	peak	587341	587513	ID=peak_1953	wt4_38_S51444
Ca22chr2A_C_albicans_SC5314	macs2	peak	587588	587783	ID=peak_1954	wt4_38_S51444
Ca22chr2A_C_albicans_SC5314	macs2	peak	587890	588097	ID=peak_1955	wt2_32_S51442,wt2_H2O2_30_S51455,wt3_33_S51443,wt3_H2O2_31_S51454,wt4_38_S51444,wt4_H2O2_39_S51445
Ca22chr2A_C_albicans_SC5314	macs2	peak	591115	591184	ID=peak_1956	wt2_32_S51442
Ca22chr2A_C_albicans_SC5314	macs2	peak	592826	593797	ID=peak_1957	wt2_32_S51442,wt2_H2O2_30_S51455,wt3_33_S51443,wt3_H2O2_31_S51454,wt4_38_S51444,wt4_H2O2_39_S51445
Ca22chr2A_C_albicans_SC5314	macs2	peak	593892	595068	ID=peak_1958	wt2_32_S51442,wt2_H2O2_30_S51455,wt3_33_S51443,wt3_H2O2_31_S51454,wt4_38_S51444,wt4_H2O2_39_S51445
Ca22chr2A_C_albicans_SC5314	macs2	peak	596872	596961	ID=peak_1959	wt4_38_S51444
Ca22chr2A_C_albicans_SC5314	macs2	peak	597185	597608	ID=peak_1960	wt2_32_S51442,wt2_H2O2_30_S51455,wt3_33_S51443,wt3_H2O2_31_S51454,wt4_38_S51444,wt4_H2O2_39_S51445
Ca22chr2A_C_albicans_SC5314	macs2	peak	601498	601661	ID=peak_1961	wt2_32_S51442,wt2_H2O2_30_S51455,wt3_33_S51443,wt3_H2O2_31_S51454,wt4_H2O2_39_S51445
Ca22chr2A_C_albicans_SC5314	macs2	peak	604861	605347	ID=peak_1962	wt2_32_S51442,wt2_H2O2_30_S51455,wt3_33_S51443,wt3_H2O2_31_S51454,wt4_38_S51444,wt4_H2O2_39_S51445
Ca22chr2A_C_albicans_SC5314	macs2	peak	605510	605809	ID=peak_1963	wt2_32_S51442,wt2_H2O2_30_S51455,wt3_33_S51443,wt3_H2O2_31_S51454,wt4_H2O2_39_S51445
Ca22chr2A_C_albicans_SC5314	macs2	peak	608440	608746	ID=peak_1964	wt2_32_S51442,wt2_H2O2_30_S51455,wt3_33_S51443,wt3_H2O2_31_S51454,wt4_38_S51444,wt4_H2O2_39_S51445
Ca22chr2A_C_albicans_SC5314	macs2	peak	608921	609041	ID=peak_1965	wt2_32_S51442,wt2_H2O2_30_S51455,wt3_33_S51443,wt3_H2O2_31_S51454
Ca22chr2A_C_albicans_SC5314	macs2	peak	609280	609586	ID=peak_1966	wt2_32_S51442,wt2_H2O2_30_S51455,wt3_33_S51443,wt3_H2O2_31_S51454,wt4_38_S51444,wt4_H2O2_39_S51445
Ca22chr2A_C_albicans_SC5314	macs2	peak	610020	610324	ID=peak_1967	wt2_32_S51442,wt2_H2O2_30_S51455,wt3_33_S51443,wt3_H2O2_31_S51454,wt4_38_S51444
Ca22chr2A_C_albicans_SC5314	macs2	peak	610442	610718	ID=peak_1968	wt2_32_S51442,wt2_H2O2_30_S51455,wt3_33_S51443,wt3_H2O2_31_S51454,wt4_38_S51444,wt4_H2O2_39_S51445
Ca22chr2A_C_albicans_SC5314	macs2	peak	611282	611396	ID=peak_1969	wt4_H2O2_39_S51445
Ca22chr2A_C_albicans_SC5314	macs2	peak	613590	613855	ID=peak_1970	wt2_32_S51442,wt2_H2O2_30_S51455,wt3_H2O2_31_S51454
Ca22chr2A_C_albicans_SC5314	macs2	peak	614948	615088	ID=peak_1971	wt2_32_S51442,wt2_H2O2_30_S51455,wt3_H2O2_31_S51454
Ca22chr2A_C_albicans_SC5314	macs2	peak	616635	616826	ID=peak_1972	wt2_32_S51442,wt2_H2O2_30_S51455,wt3_33_S51443,wt3_H2O2_31_S51454,wt4_H2O2_39_S51445
Ca22chr2A_C_albicans_SC5314	macs2	peak	618523	618599	ID=peak_1973	wt4_38_S51444
Ca22chr2A_C_albicans_SC5314	macs2	peak	619720	619802	ID=peak_1974	wt2_H2O2_30_S51455,wt3_H2O2_31_S51454
Ca22chr2A_C_albicans_SC5314	macs2	peak	620159	620336	ID=peak_1975	wt2_32_S51442,wt2_H2O2_30_S51455,wt3_H2O2_31_S51454
Ca22chr2A_C_albicans_SC5314	macs2	peak	620433	620766	ID=peak_1976	wt2_32_S51442,wt2_H2O2_30_S51455,wt3_33_S51443,wt3_H2O2_31_S51454,wt4_38_S51444,wt4_H2O2_39_S51445
Ca22chr2A_C_albicans_SC5314	macs2	peak	621102	621177	ID=peak_1977	wt4_38_S51444
Ca22chr2A_C_albicans_SC5314	macs2	peak	621585	621744	ID=peak_1978	wt4_38_S51444,wt4_H2O2_39_S51445
Ca22chr2A_C_albicans_SC5314	macs2	peak	622179	622249	ID=peak_1979	wt4_38_S51444
Ca22chr2A_C_albicans_SC5314	macs2	peak	622924	622997	ID=peak_1980	wt2_32_S51442
Ca22chr2A_C_albicans_SC5314	macs2	peak	623121	623423	ID=peak_1981	wt2_32_S51442,wt2_H2O2_30_S51455,wt3_33_S51443,wt3_H2O2_31_S51454,wt4_38_S51444,wt4_H2O2_39_S51445
Ca22chr2A_C_albicans_SC5314	macs2	peak	625850	625985	ID=peak_1982	wt4_38_S51444
Ca22chr2A_C_albicans_SC5314	macs2	peak	626418	626603	ID=peak_1983	wt2_32_S51442,wt2_H2O2_30_S51455,wt3_33_S51443,wt3_H2O2_31_S51454
Ca22chr2A_C_albicans_SC5314	macs2	peak	627065	627495	ID=peak_1984	wt2_32_S51442,wt2_H2O2_30_S51455,wt3_33_S51443,wt3_H2O2_31_S51454,wt4_38_S51444,wt4_H2O2_39_S51445
Ca22chr2A_C_albicans_SC5314	macs2	peak	627591	628001	ID=peak_1985	wt2_H2O2_30_S51455,wt3_33_S51443,wt3_H2O2_31_S51454,wt4_H2O2_39_S51445
Ca22chr2A_C_albicans_SC5314	macs2	peak	629407	629809	ID=peak_1986	wt2_32_S51442,wt2_H2O2_30_S51455,wt3_33_S51443,wt3_H2O2_31_S51454,wt4_38_S51444,wt4_H2O2_39_S51445
Ca22chr2A_C_albicans_SC5314	macs2	peak	630398	630526	ID=peak_1987	wt2_32_S51442,wt2_H2O2_30_S51455,wt3_33_S51443,wt3_H2O2_31_S51454,wt4_H2O2_39_S51445
Ca22chr2A_C_albicans_SC5314	macs2	peak	636231	636422	ID=peak_1988	wt2_32_S51442,wt2_H2O2_30_S51455,wt3_33_S51443,wt3_H2O2_31_S51454,wt4_H2O2_39_S51445
Ca22chr2A_C_albicans_SC5314	macs2	peak	638607	638741	ID=peak_1989	wt2_32_S51442,wt2_H2O2_30_S51455,wt3_33_S51443,wt3_H2O2_31_S51454
Ca22chr2A_C_albicans_SC5314	macs2	peak	642058	642348	ID=peak_1990	wt2_H2O2_30_S51455,wt3_33_S51443,wt3_H2O2_31_S51454
Ca22chr2A_C_albicans_SC5314	macs2	peak	643068	643266	ID=peak_1991	wt2_32_S51442,wt2_H2O2_30_S51455,wt3_33_S51443,wt3_H2O2_31_S51454
Ca22chr2A_C_albicans_SC5314	macs2	peak	654552	654655	ID=peak_1992	wt2_32_S51442,wt2_H2O2_30_S51455,wt3_33_S51443
Ca22chr2A_C_albicans_SC5314	macs2	peak	655272	655433	ID=peak_1993	wt2_32_S51442,wt2_H2O2_30_S51455,wt3_33_S51443,wt3_H2O2_31_S51454,wt4_38_S51444,wt4_H2O2_39_S51445
Ca22chr2A_C_albicans_SC5314	macs2	peak	656882	657057	ID=peak_1994	wt2_32_S51442,wt2_H2O2_30_S51455,wt3_33_S51443,wt3_H2O2_31_S51454,wt4_38_S51444,wt4_H2O2_39_S51445
Ca22chr2A_C_albicans_SC5314	macs2	peak	658210	658747	ID=peak_1995	wt2_32_S51442,wt2_H2O2_30_S51455,wt3_33_S51443,wt3_H2O2_31_S51454,wt4_38_S51444,wt4_H2O2_39_S51445
Ca22chr2A_C_albicans_SC5314	macs2	peak	659677	659843	ID=peak_1996	wt4_38_S51444
Ca22chr2A_C_albicans_SC5314	macs2	peak	660057	661409	ID=peak_1997	wt2_32_S51442,wt2_H2O2_30_S51455,wt3_33_S51443,wt3_H2O2_31_S51454,wt4_38_S51444,wt4_H2O2_39_S51445
Ca22chr2A_C_albicans_SC5314	macs2	peak	661450	663054	ID=peak_1998	wt2_32_S51442,wt2_H2O2_30_S51455,wt3_33_S51443,wt3_H2O2_31_S51454,wt4_38_S51444,wt4_H2O2_39_S51445
Ca22chr2A_C_albicans_SC5314	macs2	peak	663120	663368	ID=peak_1999	wt2_32_S51442,wt2_H2O2_30_S51455,wt3_33_S51443,wt3_H2O2_31_S51454,wt4_H2O2_39_S51445
[truncated: 5,533 more rows]

## Sheet: edgeR_result
peakID	geneID	annotation	GeneName	EntrezID	logFC	logCPM	FDR
peak_3494	C3_06180C_A	Promoter (<=1kb)	TSA1	3642269	2.0571	7.75375	1.83288e-05
peak_887	C1_07980C_A	Promoter (<=1kb)	NA	3640696	1.82027	6.76351	1.83288e-05
peak_3522	C3_06330W_A	Promoter (<=1kb)	TSA1B	30515214	1.77275	6.59104	1.83288e-05
peak_4600	C5_00680W_A	Promoter (<=1kb)	RMT2	3641569	1.68149	7.55924	1.83288e-05
peak_7014	CR_07810W_A	Promoter (<=1kb)	YHB5	3647343	1.63316	7.26785	1.83288e-05
peak_1300	C1_11700C_A	Promoter (<=1kb)	MRF1	3645321	1.35649	7.62133	1.83288e-05
peak_4798	C5_02710W_A	Promoter (<=1kb)	TRR1	3637778	1.3022	8.71959	1.83288e-05
peak_602	C1_05160C_A	Promoter (<=1kb)	NA	3642468	1.28387	8.37986	1.83288e-05
peak_5269	C6_01510W_A	Promoter (<=1kb)	OYE23	3641618	1.25522	8.45328	1.83288e-05
peak_3079	C3_02480C_A	Promoter (<=1kb)	CCP1	3638350	1.20592	8.76666	1.83288e-05
peak_2518	C2_08310W_A	Promoter (<=1kb)	TIM22	3648168	1.17199	8.09404	1.83288e-05
peak_1146	C1_10310W_A	Promoter (<=1kb)	NA	3634906	1.11932	8.16593	1.83288e-05
peak_506	C1_04330W_A	Promoter (<=1kb)	RPN4	3644684	1.08672	10.2027	1.83288e-05
peak_159	C1_01140C_A	Promoter (<=1kb)	NA	3640202	1.05379	10.8355	1.83288e-05
peak_809	C1_07240W_A	Promoter (<=1kb)	YPD1	3644458	1.12028	8.11457	2.03653e-05
peak_1158	C1_10370W_A	Promoter (<=1kb)	NA	NA	1.09481	9.62732	2.24614e-05
peak_5782	C7_00770W_A	Promoter (<=1kb)	NA	3637959	1.1108	8.74782	3.52921e-05
peak_6442	CR_02560C_A	Promoter (<=1kb)	ASG1	3647687	1.27775	8.89804	4.00876e-05
peak_2681	C2_09880C_A	Promoter (<=1kb)	NA	3643779	1.13958	8.03578	4.44137e-05
peak_1473	C1_13450W_A	Promoter (<=1kb)	HYR1	3636226	1.38755	7.50976	4.60479e-05
peak_751	C1_06810W_A	Promoter (<=1kb)	CAT1	3639495	1.11594	8.87506	4.60479e-05
peak_6469	CR_02650C_A	Promoter (<=1kb)	DRE2	3642571	1.06152	7.53122	4.60479e-05
peak_345	C1_02840W_A	Promoter (<=1kb)	PDE2	3636877	1.23594	7.89129	5.32115e-05
peak_3038	C3_01950C_A	Promoter (<=1kb)	NA	3636599	1.2292	6.98847	5.32731e-05
peak_4561	C5_00390C_A	Promoter (<=1kb)	NA	3641552	1.15898	9.13979	6.26157e-05
peak_3503	C3_06200C_A	Downstream (<1kb)	MMS21	3642265	1.37889	6.4792	9.10612e-05
peak_525	C1_04500W_A	Promoter (<=1kb)	ICL1	3646146	1.07465	8.65498	9.37252e-05
peak_3655	C3_07340W_A	Promoter (<=1kb)	GCY1	3638477	1.05336	8.52362	9.37252e-05
peak_1314	C1_11830W_A	Distal Intergenic	tY(GUA)4	30515059	1.17157	7.65341	0.000105228
peak_6821	CR_06040W_A	Promoter (<=1kb)	NA	3644836	0.899416	9.4624	0.000123384
peak_1030	C1_09240C_A	Promoter (<=1kb)	NA	3634901	1.46239	6.5463	0.000129013
peak_5125	C6_00290W_A	Promoter (<=1kb)	NA	3646069	0.945122	10.889	0.000129013
peak_1014	C1_09140C_A	Promoter (<=1kb)	SSU81	3634944	1.11304	7.08961	0.000140771
peak_3158	C3_03410C_A	Promoter (<=1kb)	NA	3638353	0.984582	7.39144	0.00014573
peak_5847	C7_01430C_A	Promoter (<=1kb)	NA	3636961	0.885207	9.8421	0.00014573
peak_71	C1_00490C_A	5' UTR	TTR1	3639313	1.08153	7.88908	0.000160278
peak_890	C1_07990C_A	Downstream (<1kb)	NA	3640697	1.31507	6.954	0.000165354
peak_889	C1_07980C_A	Promoter (1-2kb)	NA	3640696	1.08777	6.82397	0.000202708
peak_4536	C5_00270W_A	Promoter (<=1kb)	PGA14	3641560	1.02664	8.11665	0.000202708
peak_4687	C5_01520C_A	Promoter (<=1kb)	GLR1	3647061	0.995788	7.35014	0.000202708
peak_2454	C2_07630C_A	Promoter (<=1kb)	NA	3645193	0.932828	8.11742	0.000202708
peak_592	C1_05140W_A	Promoter (<=1kb)	BRG1	3647664	0.834851	9.98854	0.000202708
peak_5305	C6_01800W_A	Promoter (<=1kb)	tA(UGC)1	30515336	-0.915953	8.4885	0.000202708
peak_633	C1_05540C_A	Promoter (<=1kb)	NA	3642503	1.09957	9.98719	0.000215179
peak_796	C1_07160C_A	Promoter (<=1kb)	NA	30515020	1.58691	5.73489	0.000217267
peak_2928	C3_00940W_A	Promoter (<=1kb)	NA	3639851	1.09161	8.04037	0.000217267
peak_1367	C1_12360C_A	Promoter (<=1kb)	RIB3	3642062	1.07111	7.61896	0.000217267
peak_3266	C3_04480C_A	Promoter (<=1kb)	RAS2	3635211	1.04468	7.14571	0.000217267
peak_6028	C7_03230C_A	Promoter (<=1kb)	NA	3641369	0.989273	9.9047	0.000217267
peak_5450	C6_03360C_A	Promoter (<=1kb)	NA	3639203	0.750403	9.56731	0.000217267
peak_3605	C3_06950W_A	Promoter (<=1kb)	NA	3638507	-0.931281	8.32123	0.000217267
peak_327	C1_02700C_A	Promoter (<=1kb)	NA	30514972	0.915318	7.94374	0.000220848
peak_739	C1_06630W_A	Promoter (<=1kb)	NA	3639544	1.09485	7.19915	0.000227576
peak_6977	CR_07530C_A	Promoter (<=1kb)	ECM22	3648000	0.958779	8.00574	0.000230185
peak_599	C1_05150C_A	5' UTR	NA	3642469	0.875898	8.17519	0.00023254
peak_3899	C4_01350W_A	Distal Intergenic	NA	NA	1.58252	7.5988	0.000238703
peak_4560	C5_00390C_A	Promoter (<=1kb)	NA	3641552	1.19907	7.12214	0.000238703
peak_1285	C1_11580W_A	Promoter (<=1kb)	NA	3645330	1.13084	7.15685	0.000238703
peak_5195	C6_00810C_A	Distal Intergenic	NA	3647068	1.06709	7.35447	0.000238703
peak_3892	C4_01300W_A	Promoter (1-2kb)	NA	3635605	0.887915	8.23209	0.000238703
peak_4838	C5_03140C_A	Promoter (<=1kb)	NA	3637798	-1.00349	7.44043	0.000238703
peak_2453	C2_07630C_A	Promoter (<=1kb)	NA	3645193	1.74802	5.44297	0.000238872
peak_1290	C1_11660W_A	Promoter (<=1kb)	GAD1	3645339	1.15077	8.46641	0.000238872
peak_420	C1_03510C_A	Promoter (<=1kb)	NA	3636916	0.984857	7.3664	0.000238872
peak_5731	C7_00350C_A	Promoter (<=1kb)	NA	3638039	0.939022	8.67763	0.000238872
peak_5182	C6_00760W_A	Promoter (<=1kb)	NA	3647080	0.759303	9.32668	0.000238872
peak_4928	C5_04010C_A	Downstream (2-3kb)	NA	3647439	-1.16505	6.76515	0.000238872
peak_2506	C2_08200W_A	Promoter (<=1kb)	NA	3648342	0.926183	8.12289	0.000239888
peak_6814	CR_06000W_A	Promoter (<=1kb)	SOK1	3642495	0.763532	10.4167	0.000239888
peak_6578	CR_03730C_A	Promoter (<=1kb)	NA	3643226	0.911597	8.23557	0.000245837
peak_934	C1_08350C_A	Promoter (<=1kb)	NA	30515030	0.794076	9.00633	0.000251508
peak_3017	C3_01830C_A	Promoter (<=1kb)	MNT2	3636583	-1.03915	7.05628	0.000251508
peak_4781	C5_02520W_A	Promoter (<=1kb)	NA	3637768	0.882514	8.52718	0.000256573
peak_6884	CR_06660W_A	Promoter (<=1kb)	SEO1	3646621	0.872792	7.89189	0.000260236
peak_5771	C7_00710W_A	Promoter (<=1kb)	RPS28B	30515349	1.43007	7.09626	0.00026728
peak_6777	CR_05730C_A	Promoter (<=1kb)	NA	3646698	1.04795	7.42977	0.000267461
peak_2725	C2_10240W_A	Promoter (<=1kb)	GPD1	3643924	0.937986	10.0463	0.000267461
peak_3327	C3_04910C_A	Promoter (<=1kb)	NCE102	3635267	0.728533	10.452	0.000267461
peak_3826	C4_00760W_A	Promoter (<=1kb)	ZCF21	3645762	-0.823089	9.56105	0.000267461
peak_1985	C2_03110W_A	Promoter (<=1kb)	NA	3642995	0.98737	7.28458	0.000274933
peak_6654	CR_04520W_A	Promoter (<=1kb)	MIM1	30515394	1.07557	7.49412	0.000279605
peak_4953	C5_04130C_A	Promoter (1-2kb)	CHT2	3636523	-1.07885	7.90465	0.000294649
peak_2508	C2_08200W_A	Exon (C2_08210C_A/C2_08210C_A, exon 1 of 1)	NA	3648342	1.46037	6.42204	0.000300564
peak_1108	C1_10040W_A	Promoter (<=1kb)	ERO1	3634810	1.15829	8.36785	0.000319923
peak_1689	C2_00250W_A	Promoter (<=1kb)	STF2	30515083	0.930116	9.77913	0.000322671
peak_2449	C2_07570W_A	Promoter (<=1kb)	RNR22	3645217	0.869247	8.51144	0.00033076
peak_4601	C5_00680W_A	5' UTR	RMT2	3641569	0.864357	7.32811	0.00033076
peak_3993	C4_02370C_A	Distal Intergenic	PGA59	3637881	-0.982262	8.6893	0.00033076
peak_5443	C6_03320W_A	Promoter (<=1kb)	NA	3639198	0.926994	7.31192	0.00033357
peak_6055	C7_03410C_A	Promoter (1-2kb)	NA	3646716	-1.04269	6.67541	0.000337811
peak_4684	C5_01510W_A	Promoter (<=1kb)	SMD3	3647060	-0.919246	8.82453	0.000346708
peak_5206	C6_00850W_A	Promoter (<=1kb)	NA	3644010	0.952171	8.37786	0.000347715
peak_5809	C7_00970C_A	Promoter (<=1kb)	YOX1	3637952	-0.951703	8.42509	0.000353984
peak_523	C1_04480C_A	Promoter (<=1kb)	TUS1	3646144	0.9555	8.47403	0.00035863
peak_5250	C6_01360W_A	Promoter (<=1kb)	NA	3641608	0.785914	8.43226	0.00035863
peak_3159	C3_03420C_A	Promoter (<=1kb)	NDE1	3638354	0.710694	9.26215	0.000380085
peak_1183	C1_10600C_A	Exon (C1_10600C_A/C1_10600C_A, exon 1 of 1)	NA	NA	-0.946448	7.16817	0.000381596
peak_2921	C3_00870W_A	Promoter (<=1kb)	NA	NA	0.756114	8.83258	0.000385142
peak_2014	C2_03310C_A	Promoter (<=1kb)	VPS20	3637427	1.13606	6.71282	0.000388027
peak_4146	C4_03890W_A	Promoter (1-2kb)	PTP2	3647858	1.06446	8.44684	0.000388027
peak_4147	C4_03890W_A	Promoter (<=1kb)	PTP2	3647858	1.04882	7.47907	0.000388027
peak_1415	C1_12910W_A	Promoter (<=1kb)	NA	30515066	0.700143	9.53775	0.000388027
peak_3604	C3_06950W_A	Promoter (1-2kb)	NA	3638507	-0.924184	7.77973	0.000388027
peak_600	C1_05150C_A	Promoter (<=1kb)	NA	3642469	0.755395	11.5133	0.000393793
peak_254	C1_02040C_A	Promoter (<=1kb)	NA	3644586	0.915011	7.4259	0.000396856
peak_5188	C6_00800C_A	Promoter (<=1kb)	NA	3647069	0.768239	9.46063	0.000396856
peak_5244	C6_01180C_A	Promoter (<=1kb)	EBP1	3644060	1.61288	9.50817	0.000396897
peak_2707	C2_10060C_A	Promoter (<=1kb)	NA	3643948	1.01088	7.11605	0.000401099
peak_2887	C3_00700W_A	Promoter (<=1kb)	VPS8	3640534	0.86481	7.91463	0.000401099
peak_7084	CR_08230C_A	Exon (CR_08240W_A/CR_08240W_A, exon 1 of 1)	tK(UUU)4	30515437	-0.80347	8.13121	0.000401099
peak_741	C1_06660W_A	Promoter (<=1kb)	NA	3639542	0.804186	7.40142	0.000421164
peak_6470	CR_02650C_A	Promoter (<=1kb)	DRE2	3642571	0.991383	6.88441	0.000421395
peak_5555	C6_04140C_A	Promoter (1-2kb)	NA	3647970	-1.06301	6.89921	0.000421395
peak_6538	CR_03250C_A	Promoter (<=1kb)	NA	3645102	1.15635	9.61386	0.000424988
peak_2450	C2_07580W_A	5' UTR	NA	3645216	1.45718	7.08918	0.000426571
peak_346	C1_02840W_A	Promoter (<=1kb)	PDE2	3636877	1.04141	6.4786	0.00045137
peak_795	C1_07160C_A	Promoter (<=1kb)	NA	30515020	0.865103	7.40188	0.00045137
peak_6353	CR_01730W_A	Promoter (<=1kb)	IFU5	3640116	0.757666	8.05765	0.00045137
peak_6516	CR_02990C_A	Promoter (<=1kb)	RIB1	3642607	0.881668	7.45971	0.000454679
peak_2375	C2_06720W_A	Promoter (<=1kb)	GRE2	3648026	1.91199	7.42026	0.000469783
peak_6813	CR_06000W_A	Distal Intergenic	SOK1	3642495	0.84748	8.05108	0.000469783
peak_3898	C4_01350W_A	Promoter (<=1kb)	NA	NA	1.29242	6.88642	0.00049049
peak_1140	C1_10280C_A	Promoter (<=1kb)	NA	3634902	0.984923	6.78297	0.00049049
peak_2477	C2_07900W_A	Promoter (<=1kb)	GDH2	3642295	0.666247	9.24643	0.000491007
peak_581	C1_05080W_A	Promoter (<=1kb)	GPT1	3647671	-0.910769	6.91342	0.000519541
peak_1020	C1_09180W_A	Promoter (1-2kb)	LYS143	3634894	1.66859	7.38786	0.000521435
peak_766	C1_06970C_A	Promoter (<=1kb)	NA	3639567	0.755684	8.0884	0.000532701
peak_3564	C3_06620W_A	Promoter (<=1kb)	FUN31	3642249	0.728408	8.50415	0.000546278
peak_1111	C1_10060C_A	Promoter (<=1kb)	NA	3634812	1.13639	6.99494	0.000553506
peak_3054	C3_02220W_A	Promoter (<=1kb)	CAP1	3636640	0.956993	6.48543	0.00056692
peak_2682	C2_09890W_A	Promoter (<=1kb)	SMM1	3643778	1.24308	8.26383	0.000612092
peak_5879	C7_01690W_A	Promoter (<=1kb)	NA	3636980	1.22696	6.08061	0.000612092
peak_1345	C1_12060C_A	Exon (C1_12050W_A/C1_12050W_A, exon 1 of 1)	NA	3642026	1.293	6.49549	0.000632021
peak_6865	CR_06450W_A	Distal Intergenic	NA	3645279	1.01879	7.53206	0.000632021
peak_2455	C2_07640W_A	Promoter (<=1kb)	NA	3645192	0.913208	6.70589	0.000632021
peak_591	C1_05130W_A	Distal Intergenic	NA	NA	0.66992	9.49589	0.000632021
peak_3291	C3_04590W_A	Promoter (1-2kb)	NA	30515204	-1.11521	6.34398	0.000632021
peak_800	C1_07180W_A	Promoter (<=1kb)	CCS1	3644476	1.44301	6.88574	0.000633756
peak_6978	CR_07530C_A	Promoter (<=1kb)	ECM22	3648000	1.35376	7.10382	0.000633756
peak_1320	C1_11860W_A	Promoter (<=1kb)	NA	3642009	0.823464	8.9326	0.000633756
peak_5370	C6_02480W_A	Promoter (<=1kb)	NA	3639170	0.743921	8.97301	0.000633756
peak_756	C1_06850W_A	Promoter (<=1kb)	PCL7	3639491	0.658012	8.70097	0.000633756
peak_112	C1_00840C_A	Promoter (<=1kb)	NRM1	3639343	-0.733478	8.17738	0.000633756
peak_2443	C2_07490W_A	Promoter (<=1kb)	HEM15	3645211	1.04553	6.49092	0.000643407
peak_5264	C6_01470W_A	Promoter (<=1kb)	NA	3641622	-0.817534	7.33311	0.000674686
peak_4588	C5_00570W_A	Promoter (<=1kb)	NA	3641589	1.03407	7.60679	0.000686968
peak_3956	C4_02000C_A	Promoter (<=1kb)	RGA2	3635661	0.811764	8.03068	0.000687409
peak_808	C1_07230W_A	Promoter (<=1kb)	PHO15	3644459	0.824935	7.14668	0.000690298
peak_4914	C5_03900W_A	Exon (C5_03900W_A/C5_03900W_A, exon 1 of 1)	PGA56	30515313	-0.952361	7.02363	0.000711069
peak_3644	C3_07280C_A	Promoter (<=1kb)	NA	3638431	0.833316	7.14243	0.000720641
peak_5561	C6_04190C_A	Promoter (<=1kb)	NA	3646282	-0.857135	7.43677	0.000720641
peak_2640	C2_09460C_A	Promoter (1-2kb)	RHA1	3647713	0.70269	8.48181	0.000722517
peak_4643	C5_01100C_A	Promoter (1-2kb)	CLN3	3642624	-0.706157	8.18894	0.000722517
peak_4012	C4_02530W_A	Promoter (<=1kb)	ARG83	3637862	0.950476	7.24313	0.000726732
peak_6868	CR_06460W_A	Promoter (<=1kb)	GST3	3645278	1.26659	5.97811	0.000728679
peak_154	C1_01130W_A	Downstream (<1kb)	NA	3640178	1.267	5.83821	0.000731579
peak_2376	C2_06720W_A	Downstream (2-3kb)	GRE2	3648026	1.20866	6.08181	0.000731579
peak_5359	C6_02340W_A	Promoter (1-2kb)	HRR25	3645878	1.06281	6.4234	0.000731579
peak_6573	CR_03710C_A	Promoter (<=1kb)	NA	3643224	0.847111	8.00357	0.000731579
peak_902	C1_08070W_A	Promoter (<=1kb)	CDR4	3640711	0.824437	8.85469	0.000731579
peak_1134	C1_10220C_A	Promoter (<=1kb)	TPK1	3634879	0.717535	8.71033	0.000731579
peak_3469	C3_05930W_A	Promoter (<=1kb)	CTA4	3641743	0.683706	8.44863	0.000731579
peak_266	C1_02120C_A	Downstream (1-2kb)	SHA3	3644580	0.646538	9.31894	0.000731579
peak_2067	C2_03710W_A	Promoter (1-2kb)	MNN41	3637374	-0.924349	6.91078	0.000735019
peak_5275	C6_01540C_A	Downstream (<1kb)	NA	30515333	1.03328	6.17098	0.000741704
peak_4883	C5_03510C_A	Exon (C5_03500W_A/C5_03500W_A, exon 1 of 1)	NA	3646969	0.852307	8.34156	0.000747091
peak_2035	C2_03500W_A	Distal Intergenic	NA	3637345	1.24488	9.18873	0.00076867
peak_894	C1_08000W_A	Promoter (<=1kb)	NRP1	3640698	0.894064	8.8777	0.00076867
peak_3091	C3_02660W_A	Promoter (<=1kb)	NA	3638404	-0.732139	9.3726	0.000795425
peak_2049	C2_03540W_A	Promoter (<=1kb)	RAD32	3637340	0.731978	9.22908	0.00080003
peak_2893	C3_00720W_A	Distal Intergenic	PMA1	3640531	0.66866	10.3066	0.000824621
peak_7398	CR_09830W_A	Promoter (<=1kb)	NA	3638986	1.6112	7.82618	0.000838364
peak_6688	CR_04960C_A	Promoter (<=1kb)	CRG1	3646393	0.760562	7.21341	0.000858446
peak_4886	C5_03510C_A	Promoter (<=1kb)	NA	3646969	0.660066	8.96174	0.000875105
peak_3441	C3_05700W_A	Promoter (<=1kb)	CHS4	3641726	0.806183	8.24029	0.000887374
peak_6929	CR_07060C_A	Downstream (2-3kb)	CRZ2	3645725	0.881706	7.24321	0.000887833
peak_3183	C3_03700C_A	Promoter (<=1kb)	NA	NA	0.658339	8.70562	0.000887833
peak_3137	C3_03230C_A	Promoter (<=1kb)	NA	3638316	0.824703	7.22335	0.000894877
peak_1807	C2_01410C_A	Promoter (<=1kb)	CLB2	3635840	-0.817318	9.95756	0.000894877
peak_1083	C1_09780C_A	Promoter (<=1kb)	NA	3634842	1.08013	6.28505	0.000909781
peak_3532	C3_06460C_A	Exon (C3_06450W_A/C3_06450W_A, exon 1 of 1)	tH(GUG)3	30515217	-0.854343	7.41247	0.000909785
peak_3274	C3_04520C_A	Promoter (<=1kb)	ADE2	3635259	0.861606	7.63724	0.000922773
peak_4644	C5_01100C_A	Promoter (1-2kb)	CLN3	3642624	-0.678669	8.85831	0.000922773
peak_6850	CR_06340C_A	Promoter (<=1kb)	PGI1	3644847	0.696982	9.20413	0.0009362
peak_526	C1_04500W_A	Promoter (<=1kb)	ICL1	3646146	0.818109	7.25393	0.000953049
peak_4951	C5_04130C_A	Promoter (<=1kb)	CHT2	3636523	-0.75779	7.84562	0.000953049
peak_5885	C7_01760C_A	Downstream (<1kb)	ISU1	3637007	0.908132	7.4385	0.00098857
peak_404	C1_03380W_A	Promoter (<=1kb)	TPS2	3636892	0.66325	8.29018	0.00098857
peak_2285	C2_05870W_A	Promoter (<=1kb)	NA	30515128	-1.0533	6.25411	0.00098857
peak_6517	CR_03000C_A	Downstream (<1kb)	NA	3642597	1.2779	5.90556	0.000998891
peak_379	C1_03190C_A	Promoter (<=1kb)	ECM33	30514977	-0.636769	9.13438	0.00106307
peak_5404	C6_02820W_A	Promoter (<=1kb)	NA	NA	-1.18118	5.64725	0.00106307
peak_2046	C2_03530W_A	Promoter (<=1kb)	NA	3637341	0.684156	10.1193	0.00107528
peak_1849	C2_01780W_A	Promoter (<=1kb)	MSB2	3635830	-0.76953	7.01265	0.00109173
peak_6502	CR_02880W_A	Promoter (<=1kb)	NA	3642584	0.83403	6.78575	0.00110467
peak_1584	C1_14200W_A	Promoter (<=1kb)	NA	3643301	0.742766	7.39183	0.00110467
peak_6124	C7_04220W_A	Distal Intergenic	NA	NA	0.837583	9.25873	0.00111338
peak_4839	C5_03140C_A	Promoter (1-2kb)	NA	3637798	-0.739294	8.41471	0.00113632
peak_1208	C1_10840C_A	Promoter (<=1kb)	NA	3644452	0.618919	9.86611	0.0011578
peak_6543	CR_03280W_A	Downstream (<1kb)	IFR2	3645100	1.661	5.18204	0.00117067
peak_963	C1_08610C_A	Promoter (<=1kb)	NA	3646512	0.698569	7.68464	0.00117067
peak_4170	C4_04060W_A	Exon (C4_04060W_A/C4_04060W_A, exon 1 of 1)	NA	NA	0.792224	7.77492	0.00120135
peak_4800	C5_02720W_A	Promoter (<=1kb)	PEP12	3637737	0.766223	7.92316	0.00120135
peak_442	C1_03750W_A	Promoter (<=1kb)	NA	3644690	0.729728	7.36139	0.00124702
peak_1984	C2_03110W_A	Promoter (<=1kb)	NA	3642995	0.673557	7.87218	0.00124702
peak_6418	CR_02300C_A	Promoter (<=1kb)	NA	3644938	-0.883399	7.74885	0.00125455
peak_1572	C1_14120C_A	Promoter (1-2kb)	RBE1	3643317	0.639455	8.11407	0.00128389
peak_3067	C3_02310W_A	Promoter (<=1kb)	MEP1	3636553	-0.657012	7.87578	0.00128389
peak_3367	C3_05180W_A	Promoter (1-2kb)	RHB1	3635232	-0.799841	7.35907	0.00129753
peak_347	C1_02840W_A	Promoter (<=1kb)	PDE2	3636877	0.826416	6.72939	0.00131374
peak_1317	C1_11850W_A	5' UTR	NA	3642010	-0.749354	7.53837	0.00134959
peak_4188	C4_04320W_A	Promoter (1-2kb)	FRE10	3646841	-0.642572	9.06407	0.00134967
peak_1414	C1_12910W_A	Promoter (1-2kb)	NA	30515066	1.11178	6.16114	0.00140433
peak_4191	C4_04320W_A	Promoter (<=1kb)	FRE10	3646841	-0.708484	7.48151	0.00141593
peak_465	C1_03880C_A	Exon (C1_03880C_A/C1_03880C_A, exon 1 of 1)	NA	3646409	0.863939	7.24615	0.00145674
peak_2638	C2_09460C_A	Promoter (<=1kb)	RHA1	3647713	0.681558	7.67498	0.00145674
peak_6453	CR_02630C_A	Distal Intergenic	NA	3642568	-0.812637	7.05804	0.00145674
peak_4840	C5_03150W_A	Promoter (1-2kb)	NA	3637799	-1.00423	7.77291	0.00147763
peak_1204	C1_10800C_A	Promoter (<=1kb)	ALP1	3644437	0.67322	8.28238	0.00150292
peak_7473	CR_10350C_A	Promoter (<=1kb)	TRX1	3638950	0.596543	9.09372	0.00151967
peak_4222	C4_04580W_A	Promoter (<=1kb)	ZDS1	3641103	-0.970224	6.0188	0.00151967
peak_4187	C4_04310W_A	Distal Intergenic	COX11	3646842	-0.937397	6.4159	0.0015397
peak_5889	C7_01780W_A	Promoter (<=1kb)	LPI9	3637060	1.25041	5.46426	0.00154381
peak_7219	CR_08740W_A	Exon (CR_08740W_A/CR_08740W_A, exon 1 of 1)	NA	3642123	-0.654109	7.88477	0.00154484
peak_1032	C1_09260C_A	Exon (C1_09250W_A/C1_09250W_A, exon 1 of 1)	PTC1	3634827	1.04005	6.11354	0.00157873
peak_7002	CR_07740W_A	Promoter (<=1kb)	NA	30515430	0.816239	7.3878	0.00157873
peak_1057	C1_09530W_A	Distal Intergenic	RAM2	3634767	-0.899756	6.47568	0.0015859
peak_1465	C1_13330C_A	Promoter (<=1kb)	NA	3636150	0.685843	9.2483	0.00163089
peak_5487	C6_03700W_A	Distal Intergenic	ALS1	3640280	0.781744	8.88155	0.00165485
peak_6762	CR_05610C_A	Promoter (<=1kb)	SRR1	3647589	-0.812884	6.9922	0.00165485
peak_5263	C6_01450C_A	Promoter (<=1kb)	NA	3641624	-0.751654	7.82581	0.00171121
peak_3203	C3_03890W_A	5' UTR	CSC25	3645660	0.900041	6.73967	0.00178858
peak_7454	CR_10260W_A	Promoter (<=1kb)	NA	3638932	0.643449	8.12241	0.00178858
peak_5488	C6_03700W_A	Promoter (<=1kb)	ALS1	3640280	0.542306	10.9879	0.00178858
peak_1179	C1_10590W_A	Promoter (<=1kb)	NA	30515042	-1.12456	6.95851	0.00178858
peak_981	C1_08940C_A	Promoter (<=1kb)	MSN4	3634911	0.587348	8.79194	0.00184687
peak_6268	CR_00790C_A	Promoter (<=1kb)	NA	NA	0.612566	8.85576	0.00192775
peak_972	C1_08790W_A	Promoter (<=1kb)	TPO3	3634790	0.631982	9.09531	0.00193752
peak_4919	C5_03930C_A	Promoter (<=1kb)	NA	3647447	-0.732444	8.17248	0.00193752
peak_1273	C1_11470C_A	Promoter (<=1kb)	DPP1	3644537	-0.603099	9.29609	0.00194082
peak_5811	C7_00980W_A	Promoter (1-2kb)	PHM5	3637951	-1.0466	6.48061	0.00194082
peak_5856	C7_01510W_A	Promoter (<=1kb)	NA	3637049	0.959765	6.07449	0.00195536
peak_982	C1_08940C_A	Promoter (1-2kb)	MSN4	3634911	0.869487	6.80997	0.00195536
peak_1131	C1_10210C_A	Promoter (<=1kb)	CLA4	3634878	-1.25717	5.67072	0.00195536
peak_4076	C4_03110W_A	Promoter (<=1kb)	NA	3637924	-0.68719	7.81985	0.00196601
peak_6737	CR_05390W_A	Promoter (<=1kb)	PST3	3648031	0.600566	9.33014	0.0020333
peak_5329	C6_02060W_A	Promoter (<=1kb)	SLM2	3647559	0.595465	8.94845	0.0020333
peak_3939	C4_01750C_A	Promoter (<=1kb)	FBA1	3635585	0.564198	10.3303	0.0020333
peak_983	C1_08950W_A	Promoter (1-2kb)	PFK26	3634912	0.72106	7.78526	0.00206415
peak_4410	C4_06480C_A	Promoter (<=1kb)	CEK1	3642789	-0.595739	8.1544	0.00207695
peak_6763	CR_05610C_A	Promoter (1-2kb)	SRR1	3647589	-0.80825	7.24698	0.00211045
peak_3456	C3_05810C_A	5' UTR	SKN1	3641755	-0.871684	6.86745	0.00212368
peak_1203	C1_10800C_A	Downstream (<1kb)	ALP1	3644437	1.17262	5.56109	0.00226996
peak_3983	C4_02320C_A	Promoter (<=1kb)	SOD1	30515248	0.680801	8.89381	0.00226996
peak_3567	C3_06660C_A	Promoter (<=1kb)	NA	3642253	0.64652	7.51486	0.00226996
peak_3018	C3_01840C_A	Exon (C3_01840C_A/C3_01840C_A, exon 1 of 1)	tV(AAC)2	30515180	-0.6297	7.78587	0.00226996
peak_4645	C5_01110W_A	Distal Intergenic	NA	3642623	-0.692191	7.25221	0.00226996
peak_2924	C3_00920W_A	Promoter (<=1kb)	ATO1	3647761	-0.737625	6.80779	0.00226996
peak_4134	C4_03640C_A	Promoter (<=1kb)	tD(GUC)4	30515259	-0.818916	7.33251	0.00226996
peak_6952	CR_07280W_A	5' UTR	FRE30	3646025	-0.901799	6.75443	0.00226996
peak_2892	C3_00710W_A	Distal Intergenic	CHS8	3640532	0.76445	7.23348	0.00227822
peak_3455	C3_05810C_A	5' UTR	SKN1	3641755	-0.898978	6.2073	0.00227985
peak_340	C1_02810W_A	Promoter (<=1kb)	RAD16	3636874	0.92931	7.76744	0.00229781
peak_4095	C4_03380C_A	Promoter (<=1kb)	DAO2	3646797	0.825823	6.93485	0.00230353
peak_1722	C2_00600C_A	Promoter (<=1kb)	NA	3638850	0.838349	6.58921	0.00235442
peak_1347	C1_12070C_A	Promoter (<=1kb)	NA	3642025	2.18472	4.39578	0.0024205
peak_3597	C3_06880W_A	Promoter (<=1kb)	NA	3638539	0.687832	9.40154	0.00242194
peak_5194	C6_00810C_A	Promoter (<=1kb)	NA	3647068	0.606946	8.33014	0.00245988
peak_333	C1_02730W_A	Promoter (<=1kb)	NA	3636826	-1.03368	5.72575	0.00245988
peak_952	C1_08500C_A	5' UTR	ENO1	3646493	0.685973	9.04288	0.00247336
peak_6708	CR_05190W_A	5' UTR	NA	3648079	0.845627	6.24831	0.00248248
peak_5270	C6_01520W_A	Promoter (<=1kb)	NA	3641617	0.761482	6.91703	0.00248248
peak_4324	C4_05590W_A	Promoter (<=1kb)	NA	3641776	0.64025	7.86575	0.0025125
peak_5565	C6_04210C_A	Promoter (<=1kb)	ATM1	3646284	0.704421	7.00707	0.00259192
peak_4015	C4_02540W_A	Promoter (1-2kb)	RGT1	3637920	2.10994	4.44296	0.00265009
peak_4332	C4_05680W_A	Promoter (<=1kb)	PHO4	3641817	-1.21546	6.42098	0.00273369
peak_1376	C1_12470W_A	Promoter (<=1kb)	NA	3648182	0.799191	6.53804	0.00274294
peak_6800	CR_05990C_A	Promoter (1-2kb)	SFL1	3642498	-0.615627	7.94709	0.00274294
peak_323	C1_02630C_A	Promoter (<=1kb)	EXG2	3636816	0.903844	6.41571	0.00275921
peak_5549	C6_04130C_A	Promoter (<=1kb)	ALS4	3647972	-0.607258	8.64842	0.00275921
peak_2363	C2_06680W_A	Promoter (1-2kb)	FRP3	3648102	-0.881854	6.05922	0.00275921
peak_1946	C2_02860W_A	Promoter (<=1kb)	SUR2	3642973	0.733171	7.46371	0.00276866
peak_1755	C2_00970C_A	Promoter (<=1kb)	UBP13	3638879	0.5584	11.354	0.0027848
peak_4922	C5_03950W_A	Promoter (<=1kb)	NA	3647445	-0.757526	6.87574	0.0027848
peak_3690	C3_07560W_A	Promoter (1-2kb)	TCC1	3638524	-0.574569	9.07215	0.00279617
peak_580	C1_05070C_A	Promoter (<=1kb)	GPI7	3647672	-0.665952	7.36646	0.00279617
peak_6697	CR_05050W_A	Promoter (<=1kb)	GLN1	3646386	-0.73392	6.72296	0.00283679
peak_6593	CR_03830C_A	Promoter (<=1kb)	MCM2	3643197	-0.871403	6.37799	0.00283853
peak_4339	C4_05730W_A	Promoter (<=1kb)	NA	3641805	-1.23301	5.46263	0.00285577
peak_2862	C3_00490W_A	Promoter (<=1kb)	ESA1	3640518	0.816162	8.65913	0.00285798
peak_5813	C7_00980W_A	Promoter (<=1kb)	PHM5	3637951	-1.10349	5.52081	0.00285798
peak_4447	C4_06780C_A	Promoter (<=1kb)	OYE32	3642919	1.9613	8.78551	0.00287253
peak_4833	C5_03130W_A	Promoter (1-2kb)	SUT1	3637706	0.947441	6.29989	0.00287253
peak_5554	C6_04140C_A	Promoter (<=1kb)	NA	3647970	-0.805227	7.22909	0.0028956
peak_2025	C2_03390C_A	Promoter (<=1kb)	HSP78	3637414	0.671404	7.19064	0.00290706
peak_1141	C1_10280C_A	Promoter (<=1kb)	NA	3634902	1.10741	5.71067	0.0029203
peak_344	C1_02840W_A	Promoter (1-2kb)	PDE2	3636877	0.638743	7.42116	0.0029203
peak_5124	C6_00280W_A	Promoter (<=1kb)	CPH2	3646067	0.573826	9.00193	0.0029203
peak_4911	C5_03880C_A	Promoter (<=1kb)	NA	3647222	-0.664088	8.15599	0.00292117
peak_3686	C3_07550C_A	Promoter (<=1kb)	NA	3638525	-0.708607	6.86821	0.00301156
peak_2936	C3_01020W_A	Promoter (1-2kb)	NA	3639828	-0.86398	6.31814	0.0030192
peak_4014	C4_02540W_A	Distal Intergenic	RGT1	3637920	0.701297	7.06869	0.00309766
peak_6528	CR_03120W_A	Promoter (<=1kb)	NA	3645123	0.818941	6.6863	0.0031125
peak_7471	CR_10350C_A	Exon (CR_10340W_A/CR_10340W_A, exon 1 of 1)	TRX1	3638950	0.915187	6.33957	0.00324559
peak_4931	C5_04030W_A	Promoter (<=1kb)	NA	3647737	-0.568985	8.40024	0.00324985
peak_5232	C6_01070C_A	Promoter (1-2kb)	CIP1	3644018	1.58425	5.32971	0.00333149
peak_3593	C3_06860C_A	Downstream (1-2kb)	NA	3638541	0.818667	7.76588	0.00344954
peak_6423	CR_02350C_A	Promoter (<=1kb)	GEF2	3644935	0.575006	8.28167	0.00348292
peak_5940	C7_02040C_A	Promoter (1-2kb)	CUP9	3636950	0.544297	11.1035	0.00352405
peak_4442	C4_06750C_A	Promoter (<=1kb)	NA	NA	0.539379	8.84221	0.00354522
peak_5310	C6_01880W_A	Promoter (<=1kb)	NA	3641599	0.642574	7.70924	0.00355234
peak_2517	C2_08300C_A	Promoter (<=1kb)	NA	NA	0.568992	8.16936	0.00355389
peak_5042	C5_05050W_A	Promoter (<=1kb)	ADH1	3636489	0.544798	10.9301	0.00358331
peak_5848	C7_01430C_A	Distal Intergenic	NA	3636961	1.71324	4.69228	0.00358716
peak_4921	C5_03950W_A	Promoter (<=1kb)	NA	3647445	-1.15456	5.42414	0.00359772
peak_2301	C2_06050C_A	Promoter (<=1kb)	tM(CAU)3	30515132	-0.587456	7.5457	0.00365028
peak_4011	C4_02520C_A	Promoter (<=1kb)	NA	3637863	1.29547	6.09151	0.00367161
peak_1378	C1_12460C_A	Promoter (<=1kb)	NA	NA	0.987139	5.90531	0.00372447
peak_1128	C1_10180C_A	Promoter (<=1kb)	ECM21	3634784	0.816639	7.62656	0.00378681
peak_4462	C4_06900W_A	Promoter (<=1kb)	GST1	3642909	1.19253	5.4341	0.00382648
peak_1392	C1_12620W_A	Promoter (<=1kb)	SPA2	3646824	-0.803299	6.51615	0.00382648
peak_698	C1_06300W_A	Distal Intergenic	NA	30515004	-0.882301	6.01344	0.00382648
peak_1359	C1_12250C_A	Promoter (<=1kb)	NA	3642022	0.823463	6.32719	0.00386493
peak_2090	C2_04010C_A	Promoter (<=1kb)	HSP21	3637364	0.705571	6.84002	0.00386493
peak_5437	C6_03250W_A	Promoter (<=1kb)	BMT4	3639182	-0.551962	9.11117	0.00386493
peak_2837	C3_00220W_A	Promoter (<=1kb)	HGT19	3640558	-0.657953	7.46584	0.00386493
peak_6324	CR_01400W_A	Promoter (<=1kb)	LYS12	3640134	0.618856	7.78911	0.00392733
peak_5972	C7_02460C_A	5' UTR	NA	3636946	0.855094	6.13422	0.00396176
peak_1790	C2_01270W_A	Exon (C2_01290C_A/C2_01290C_A, exon 2 of 2)	CHA1	3638791	-0.74404	6.46664	0.00396176
peak_1298	C1_11700C_A	Exon (C1_11690W_A/C1_11690W_A, exon 1 of 1)	MRF1	3645321	1.07977	5.86924	0.00400762
peak_2037	C2_03500W_A	Distal Intergenic	NA	3637345	0.75137	7.69327	0.00402245
peak_4957	C5_04150C_A	Downstream (<1kb)	NA	3636525	-0.587843	8.39688	0.00402245
peak_558	C1_04870W_A	5' UTR	SAP7	3644783	-0.605963	7.57222	0.00402245
peak_4148	C4_03890W_A	Promoter (<=1kb)	PTP2	3647858	0.589958	8.38373	0.00404685
peak_1126	C1_10180C_A	Promoter (<=1kb)	ECM21	3634784	0.542463	8.4617	0.00406864
peak_2008	C2_03270W_A	Promoter (<=1kb)	GPM1	3637431	0.531688	8.55032	0.0040787
peak_3066	C3_02310W_A	Promoter (1-2kb)	MEP1	3636553	-0.617939	7.71208	0.00410247
peak_6875	CR_06550C_A	Promoter (<=1kb)	NA	3645260	0.731981	7.00508	0.00411869
peak_2188	C2_05060C_A	Promoter (<=1kb)	NA	3643451	1.11964	9.49571	0.00425646
peak_516	C1_04450C_A	Promoter (<=1kb)	FMA1	3647986	0.584101	7.81692	0.00425646
peak_312	C1_02530C_A	Promoter (<=1kb)	DIP5	3636798	-0.763573	8.50946	0.00425646
peak_1132	C1_10210C_A	Promoter (1-2kb)	CLA4	3634878	-0.938005	5.9658	0.00425646
peak_790	C1_07120W_A	Promoter (<=1kb)	GAP4	3644463	-0.947838	6.71844	0.00425646
peak_688	C1_06290C_A	Downstream (2-3kb)	NA	NA	-1.00801	7.14843	0.00425646
peak_7106	CR_08340W_A	Promoter (<=1kb)	CYS3	3642081	0.661835	8.57567	0.00427608
peak_4062	C4_02990C_A	Promoter (<=1kb)	GST2	3637937	0.859245	6.2379	0.00432836
peak_4180	C4_04220W_A	Promoter (<=1kb)	DUO1	3646858	-0.933367	5.71588	0.00448679
peak_6409	CR_02240C_A	Promoter (<=1kb)	OPT2	3644915	-0.659639	7.40896	0.0045593
peak_3488	C3_06100C_A	Promoter (<=1kb)	DED1	3641752	0.602342	7.60368	0.0045599
peak_111	C1_00800C_A	Downstream (<1kb)	ERG2	3639347	-0.682564	6.76223	0.0045599
peak_7505	CR_10610C_A	Promoter (<=1kb)	NA	3639005	-0.695232	6.7062	0.0045599
peak_6049	C7_03350C_A	Promoter (<=1kb)	NA	3646722	0.768536	6.49139	0.00459297
peak_107	C1_00790W_A	Distal Intergenic	NA	3639348	-0.723886	7.39538	0.00459297
peak_5057	C5_05190W_A	Promoter (<=1kb)	PCL5	3636466	0.518368	8.71498	0.00463673
peak_6803	CR_05990C_A	Distal Intergenic	SFL1	3642498	-0.583246	7.87227	0.00470599
peak_6927	CR_07060C_A	Distal Intergenic	CRZ2	3645725	0.662291	7.68059	0.00473266
peak_7005	CR_07780W_A	Promoter (<=1kb)	NA	3647352	0.638404	7.37741	0.00473546
peak_6464	CR_02650C_A	Distal Intergenic	DRE2	3642571	-0.65825	6.91194	0.00482296
peak_1318	C1_11850W_A	5' UTR	NA	3642010	0.881337	6.26522	0.00482745
peak_3961	C4_02030W_A	Promoter (1-2kb)	RFX2	3635658	-0.77714	6.77007	0.00483675
peak_3893	C4_01300W_A	Promoter (<=1kb)	NA	3635605	0.506453	8.94604	0.00498409
peak_5243	C6_01180C_A	Exon (C6_01180C_A/C6_01180C_A, exon 1 of 1)	EBP1	3644060	1.17466	5.85203	0.00499431
peak_4935	C5_04030W_A	Downstream (2-3kb)	NA	3647737	-0.701979	6.73378	0.00499431
peak_5904	C7_01920W_A	Promoter (<=1kb)	CDC34	3637028	0.525362	9.17081	0.00511856
peak_6217	CR_00290W_A	Promoter (<=1kb)	NA	3639717	-0.541618	7.8911	0.00516186
peak_4779	C5_02470W_A	Promoter (<=1kb)	INT1	3637761	-1.05523	5.82112	0.00522659
peak_2425	C2_07260C_A	Promoter (<=1kb)	DQD1	3643488	0.586242	7.62336	0.00528846
peak_7391	CR_09780C_A	Promoter (<=1kb)	IFA14	3639012	0.834461	6.07572	0.00533333
peak_4642	C5_01100C_A	Promoter (<=1kb)	CLN3	3642624	-0.562141	8.23156	0.0053428
peak_4703	C5_01690C_A	Downstream (<1kb)	CCT7	3643734	-0.894933	5.75454	0.00536463
peak_4933	C5_04030W_A	Distal Intergenic	NA	3647737	-1.03588	6.13564	0.00536463
peak_6123	C7_04210C_A	Promoter (<=1kb)	NA	3643121	0.49971	11.2484	0.00545772
peak_6519	CR_03010C_A	Promoter (<=1kb)	ERV1	30515385	0.95745	6.11502	0.00552591
peak_6574	CR_03720W_A	Promoter (<=1kb)	TAL1	3643225	0.523352	8.05008	0.00552591
peak_3412	C3_05460W_A	5' UTR	NA	3643670	-0.658725	7.68051	0.00555113
peak_3427	C3_05600W_A	Promoter (<=1kb)	ATO6	3643664	-0.722252	7.0385	0.0056305
peak_1891	C2_02220C_A	Promoter (<=1kb)	NA	3635774	-1.17137	5.42672	0.0056454
peak_1262	C1_11430W_A	Promoter (<=1kb)	NA	3644541	-0.502962	8.62997	0.00565288
peak_2362	C2_06680W_A	Promoter (1-2kb)	FRP3	3648102	-0.575919	7.55712	0.00581392
peak_5306	C6_01810W_A	Exon (C6_01810W_A/C6_01810W_A, exon 1 of 1)	NA	3641634	-1.021	5.66676	0.00581392
peak_2667	C2_09730C_A	Promoter (<=1kb)	IPK2	3643784	0.588858	7.4722	0.00584243
peak_5579	C6_04350C_A	Promoter (1-2kb)	FLO8	3646292	0.526504	8.05218	0.00584243
peak_704	C1_06310W_A	Distal Intergenic	NA	30515005	-0.568843	7.60929	0.00584243
peak_5014	C5_04820W_A	Promoter (1-2kb)	NA	NA	-0.565865	7.71334	0.00586888
peak_3100	C3_02730C_A	Exon (C3_02720W_A/C3_02720W_A, exon 1 of 1)	tF(GAA)1	30515191	-0.836957	6.09788	0.00596093
peak_499	C1_04290C_A	Promoter (<=1kb)	ACS2	3644710	0.49973	8.69085	0.00602841
peak_5257	C6_01410C_A	Promoter (<=1kb)	OYE2	3641603	0.936684	6.11484	0.00609241
peak_6468	CR_02650C_A	Downstream (<1kb)	DRE2	3642571	1.58339	4.97948	0.00612864
peak_6577	CR_03720W_A	Exon (CR_03730C_A/CR_03730C_A, exon 1 of 1)	TAL1	3643225	0.608957	7.27733	0.00619278
peak_1830	C2_01710W_A	Promoter (<=1kb)	HSK3	3635730	0.563546	7.82438	0.00619278
peak_1307	C1_11770C_A	Promoter (<=1kb)	NA	3645327	-0.648736	8.29057	0.00619278
peak_4072	C4_03070W_A	Promoter (1-2kb)	PGA54	3637929	-0.607325	7.88361	0.00621053
peak_4923	C5_03950W_A	5' UTR	NA	3647445	-1.13528	6.20318	0.00622916
peak_199	C1_01520C_A	Promoter (<=1kb)	SOD2	3640231	0.55924	7.3847	0.0062953
peak_2697	C2_09980W_A	5' UTR	NA	3643965	0.690491	6.63955	0.00631639
peak_2335	C2_06450C_A	Promoter (<=1kb)	NA	NA	0.638149	6.99856	0.00638735
peak_1444	C1_13160W_A	Promoter (<=1kb)	PSA2	3636159	0.900737	6.4992	0.00643962
peak_6924	CR_07060C_A	Promoter (<=1kb)	CRZ2	3645725	1.18029	5.60361	0.00646335
peak_6572	CR_03700C_A	Promoter (<=1kb)	NA	3643223	0.660344	7.44392	0.00655163
peak_4885	C5_03510C_A	5' UTR	NA	3646969	0.624259	8.15647	0.00655163
peak_3714	C3_07720C_A	Promoter (<=1kb)	NA	NA	-0.546971	8.67805	0.00655163
peak_4331	C4_05680W_A	Promoter (<=1kb)	PHO4	3641817	-0.580569	8.74878	0.00655163
peak_6886	CR_06670W_A	Distal Intergenic	CFL11	3646622	-0.688572	7.21823	0.00655163
peak_690	C1_06290C_A	Downstream (1-2kb)	NA	NA	-0.947639	6.69922	0.00655163
peak_1060	C1_09540W_A	Distal Intergenic	NA	3634885	-0.772547	6.20325	0.00655848
peak_765	C1_06940C_A	Promoter (<=1kb)	ATC1	3639570	-0.545201	8.73061	0.0065805
peak_5013	C5_04820W_A	Promoter (1-2kb)	NA	NA	-0.699362	7.14272	0.00686835
peak_877	C1_07890C_A	Promoter (<=1kb)	ADE5,7	3640719	-0.770394	6.11532	0.00686835
peak_1077	C1_09690W_A	Promoter (<=1kb)	MLS1	3634875	0.53458	9.1747	0.00691321
peak_157	C1_01140C_A	Exon (C1_01140C_A/C1_01140C_A, exon 1 of 1)	NA	3640202	1.06758	6.01851	0.00693623
peak_4201	C4_04400C_A	Promoter (1-2kb)	NA	30515268	1.14537	5.45464	0.00699034
peak_4463	C4_06900W_A	Promoter (<=1kb)	GST1	3642909	1.55733	6.5114	0.00701198
peak_3556	C3_06560W_A	Promoter (<=1kb)	NA	3642276	0.864839	5.85521	0.00712594
peak_4694	C5_01590W_A	Promoter (<=1kb)	NA	3647041	0.696311	6.48278	0.00712594
peak_6653	CR_04510W_A	Promoter (<=1kb)	HXK2	3641015	0.507716	8.57801	0.00716287
peak_1266	C1_11450C_A	Exon (C1_11450C_A/C1_11450C_A, exon 1 of 1)	SAM2	3644538	-0.640016	6.95443	0.00717392
peak_196	C1_01510W_A	Distal Intergenic	NA	3640229	-0.643074	6.73911	0.00723017
peak_6503	CR_02880W_A	Promoter (<=1kb)	NA	3642584	0.927475	6.81503	0.00724187
peak_5191	C6_00810C_A	Downstream (<1kb)	NA	3647068	0.753531	6.58633	0.00724187
peak_4844	C5_03170C_A	Promoter (<=1kb)	NA	3637801	-0.686966	6.41974	0.00724187
peak_6736	CR_05380C_A	Promoter (<=1kb)	YCP4	3648032	0.895572	5.73261	0.0072789
peak_1474	C1_13450W_A	Promoter (<=1kb)	HYR1	3636226	1.59428	4.74977	0.00730828
peak_2404	C2_06970W_A	Promoter (<=1kb)	AAH1	3643529	0.569311	7.40283	0.00730828
peak_6333	CR_01460C_A	Exon (CR_01460C_A/CR_01460C_A, exon 1 of 1)	NA	NA	0.561904	7.23346	0.00730828
peak_649	C1_05840W_A	Promoter (<=1kb)	PRN1	3639882	0.542231	8.00971	0.00730828
peak_532	C1_04580C_A	Promoter (<=1kb)	NA	3646132	-0.532044	8.2016	0.00730828
peak_6918	CR_07050C_A	5' UTR	URA2	3645728	-1.21431	5.31569	0.00731849
peak_2852	C3_00360W_A	Promoter (1-2kb)	NA	3640542	0.687098	6.6739	0.00732746
peak_4451	C4_06820C_A	Promoter (1-2kb)	CZF1	3642915	0.462117	10.56	0.00732746
peak_3603	C3_06950W_A	Distal Intergenic	NA	3638507	-0.625201	7.2445	0.00732746
peak_788	C1_07120W_A	Promoter (1-2kb)	GAP4	3644463	-0.737839	6.5974	0.00732746
peak_6849	CR_06330C_A	5' UTR	NA	3644846	1.05588	5.59534	0.00733977
peak_6488	CR_02820W_A	Promoter (<=1kb)	PGM2	3642562	0.650754	7.39694	0.00738525
peak_1007	C1_09120W_A	Promoter (<=1kb)	IPT1	3634941	-0.499101	8.93901	0.00738525
peak_5018	C5_04820W_A	Exon (C5_04820W_A/C5_04820W_A, exon 1 of 1)	NA	NA	-0.55736	7.34943	0.00749264
peak_5309	C6_01870C_A	Promoter (<=1kb)	NA	3641625	0.545331	7.79894	0.00754047
peak_5017	C5_04820W_A	5' UTR	NA	NA	-0.704804	6.61826	0.0075741
peak_3497	C3_06190C_A	Exon (C3_06190C_A/C3_06190C_A, exon 1 of 1)	ALS6	3642266	-0.645701	6.69874	0.00768207
peak_3202	C3_03890W_A	Promoter (<=1kb)	CSC25	3645660	0.486997	8.53442	0.00769226
peak_2838	C3_00220W_A	Promoter (<=1kb)	HGT19	3640558	-0.596563	7.28128	0.00769226
peak_155	C1_01140C_A	Exon (C1_01140C_A/C1_01140C_A, exon 1 of 1)	NA	3640202	0.891638	6.32626	0.0077328
peak_6926	CR_07060C_A	Promoter (1-2kb)	CRZ2	3645725	0.555799	8.45821	0.0077328
peak_5259	C6_01430C_A	Promoter (<=1kb)	FRP6	3641601	-0.879249	5.85783	0.0077328
peak_2361	C2_06680W_A	Distal Intergenic	FRP3	3648102	-1.12975	5.51878	0.0077328
peak_893	C1_07990C_A	Promoter (<=1kb)	NA	3640697	1.42944	7.11717	0.00774299
peak_1377	C1_12470W_A	Promoter (<=1kb)	NA	3648182	0.988322	5.63207	0.00776407
peak_5560	C6_04190C_A	Promoter (<=1kb)	NA	3646282	-0.758276	6.54802	0.00776407
peak_3984	C4_02330C_A	Promoter (<=1kb)	NA	3637884	0.696959	7.6078	0.0077717
peak_4002	C4_02410C_A	Promoter (<=1kb)	AHP1	3637850	0.484359	9.24378	0.0078396
peak_6609	CR_03920C_A	Promoter (<=1kb)	TPO4	3640956	0.533763	7.43177	0.00784945
peak_1182	C1_10600C_A	Downstream (<1kb)	NA	NA	-0.586701	7.77499	0.00794434
peak_6846	CR_06310W_A	Promoter (<=1kb)	NA	3644860	-0.614626	6.71676	0.00804797
peak_1770	C2_01090C_A	5' UTR	ERG28	3638833	0.695292	6.57407	0.00810383
peak_4582	C5_00540C_A	Promoter (<=1kb)	AGA1	3641536	-0.588464	7.52348	0.00810383
peak_5504	C6_03790C_A	Promoter (1-2kb)	HGT10	3640309	0.486681	9.5436	0.00813285
peak_6539	CR_03270W_A	Promoter (<=1kb)	NA	3645101	-1.17606	5.21193	0.00813285
peak_928	C1_08330C_A	Exon (C1_08320W_A/C1_08320W_A, exon 1 of 1)	ADH2	3640751	0.713638	7.32743	0.00819484
peak_641	C1_05690C_A	Promoter (<=1kb)	NA	3639896	0.557346	7.21428	0.00819484
peak_6219	CR_00300W_A	Downstream (<1kb)	CDA2	3639716	0.522213	7.84987	0.00819484
peak_6267	CR_00780C_A	Promoter (<=1kb)	GSY1	3640435	0.455297	9.23982	0.00819484
peak_314	C1_02560W_A	5' UTR	NA	NA	-0.488874	8.97503	0.00819484
peak_6551	CR_03470W_A	Promoter (<=1kb)	NA	3643198	-0.489305	8.98849	0.00819484
peak_4799	C5_02710W_A	Exon (C5_02710W_A/C5_02710W_A, exon 1 of 1)	TRR1	3637778	0.902897	6.08492	0.0082162
peak_7413	CR_09920W_A	Promoter (1-2kb)	NA	3639028	-0.581963	7.4817	0.00834093
peak_6410	CR_02240C_A	Promoter (1-2kb)	OPT2	3644915	-0.780965	6.53298	0.00834769
peak_550	C1_04750W_A	Promoter (<=1kb)	IFE1	3644778	-0.6342	6.67261	0.00837253
peak_4128	C4_03600C_A	Promoter (<=1kb)	NA	3645366	-0.539747	8.19512	0.00847728
peak_1877	C2_02050C_A	Promoter (<=1kb)	NA	3635851	-0.901126	5.72681	0.00847728
peak_6135	C7_04240C_A	Downstream (<1kb)	NA	3643165	-0.556266	7.29447	0.00855218
peak_1804	C2_01380W_A	Promoter (<=1kb)	PLB4.5	3635724	-0.556998	7.40268	0.00855822
peak_4408	C4_06470W_A	Promoter (<=1kb)	NA	3642790	-0.654478	6.60627	0.00856867
peak_3911	C4_01400W_A	Promoter (<=1kb)	UEC1	3635628	0.496906	8.1562	0.00862602
peak_5380	C6_02560W_A	Promoter (<=1kb)	NA	3639205	0.606715	7.01916	0.0087203
peak_3041	C3_01970C_A	5' UTR	NA	3636597	0.827121	5.86702	0.00880472
peak_3231	C3_04060C_A	Promoter (<=1kb)	HEM13	3647390	0.752286	7.06128	0.00892265
peak_2680	C2_09880C_A	Promoter (<=1kb)	NA	3643779	0.996149	5.40514	0.00910743
peak_540	C1_04660W_A	Promoter (<=1kb)	DUR1,2	3644771	-0.607559	6.80973	0.00910743
peak_3090	C3_02640C_A	Promoter (<=1kb)	ZCF1	3638329	-0.741598	6.71069	0.00917487
peak_7239	CR_08870W_A	Exon (CR_08870W_A/CR_08870W_A, exon 1 of 1)	PEX13	3641877	-0.477001	8.40218	0.00919983
peak_3388	C3_05320W_A	Promoter (1-2kb)	NA	3643648	-0.699771	6.51674	0.00919983
peak_5431	C6_03180C_A	Promoter (<=1kb)	NA	3639261	0.546989	7.95995	0.00921659
peak_3989	C4_02370C_A	Downstream (1-2kb)	PGA59	3637881	-0.815131	6.56542	0.00922787
peak_1156	C1_10350C_A	Promoter (1-2kb)	NA	3634835	1.20809	5.92032	0.00925789
peak_5961	C7_02330W_A	Promoter (<=1kb)	YCF1	3636934	0.530987	7.36064	0.00925789
peak_2563	C2_08870C_A	Promoter (<=1kb)	PIR1	3645801	0.451291	8.95634	0.00929704
peak_5012	C5_04820W_A	Distal Intergenic	NA	NA	-0.487991	9.47181	0.00929704
peak_2956	C3_01180C_A	Promoter (<=1kb)	NA	3647960	-0.724963	6.11592	0.00931579
peak_5730	C7_00340C_A	Promoter (<=1kb)	NA	3638040	0.759414	7.51553	0.0096209
peak_6603	CR_03890W_A	Promoter (1-2kb)	WOR3	3641009	-0.622641	7.00544	0.0096209
peak_380	C1_03190C_A	Promoter (1-2kb)	ECM33	30514977	-0.561474	7.94816	0.00966625
peak_1896	C2_02240C_A	Exon (C2_02240C_A/C2_02240C_A, exon 1 of 1)	HEX3	3635776	0.886454	5.90023	0.00966825
peak_6553	CR_03480W_A	Promoter (<=1kb)	NA	3643199	-0.655582	7.73058	0.00967929
peak_1181	C1_10590W_A	Downstream (1-2kb)	NA	30515042	-1.33809	4.85775	0.00967929
peak_4699	C5_01650C_A	Promoter (<=1kb)	MYO1	3647248	-0.591504	7.32357	0.00980524
peak_4073	C4_03070W_A	Promoter (<=1kb)	PGA54	3637929	-0.608437	8.05831	0.00980524
peak_2305	C2_06130W_A	Exon (C2_06140C_A/C2_06140C_A, exon 1 of 1)	CSM3	3644083	0.675037	6.58288	0.00985524
peak_1379	C1_12490W_A	Promoter (<=1kb)	PEP1	3647612	0.852385	5.67953	0.00986467
peak_6652	CR_04510W_A	Promoter (<=1kb)	HXK2	3641015	0.609799	7.62225	0.00986467
peak_2997	C3_01560W_A	Promoter (<=1kb)	NA	3636669	0.553106	8.48066	0.00986467
peak_4039	C4_02730C_A	5' UTR	NA	NA	0.518999	7.74947	0.00986467
peak_5517	C6_03850C_A	Exon (C6_03850C_A/C6_03850C_A, exon 1 of 1)	IHD1	3640291	-0.657684	6.52301	0.00986467
peak_630	C1_05520W_A	Promoter (<=1kb)	NA	3642505	-0.789216	5.98623	0.00986467
peak_3408	C3_05460W_A	Distal Intergenic	NA	3643670	-0.980105	5.83568	0.00986467
peak_846	C1_07530W_A	Promoter (<=1kb)	NA	30515025	1.29719	5.10651	0.00992644
peak_5432	C6_03190C_A	Promoter (<=1kb)	NA	NA	0.619781	8.10127	0.00997928
peak_2181	C2_04960C_A	Promoter (<=1kb)	NA	3643442	0.491308	7.86926	0.00998646
peak_4044	C4_02750W_A	Promoter (<=1kb)	HIT1	3637854	0.421483	10.7918	0.00998646
peak_3908	C4_01380W_A	Promoter (<=1kb)	ZCF27	3635631	0.692606	6.83046	0.00998895
peak_4823	C5_03020W_A	Promoter (<=1kb)	CCC2	3637821	0.57661	7.1633	0.00998895
peak_7155	CR_08510W_A	Exon (CR_08510W_A/CR_08510W_A, exon 1 of 1)	PGA13	3642138	-0.550565	7.17583	0.00998895
peak_2594	C2_09120C_A	Promoter (1-2kb)	NA	NA	-0.647226	6.51894	0.00998895
peak_6308	CR_01240C_A	Promoter (<=1kb)	BOI2	3640404	-0.569245	7.11332	0.010024
peak_6259	CR_00710C_A	Promoter (<=1kb)	NA	3640440	-0.509935	7.63939	0.0100331
peak_4932	C5_04030W_A	Distal Intergenic	NA	3647737	-1.69081	4.89782	0.0101356
peak_1650	C1_14590C_A	Promoter (<=1kb)	TLO4	30515080	0.702421	6.19858	0.0102368
peak_201	C1_01530C_A	Promoter (<=1kb)	NA	3640232	0.628329	7.11135	0.0102548
peak_2391	C2_06850W_A	Distal Intergenic	NA	30515142	-0.53636	7.71014	0.0102935
peak_892	C1_07990C_A	Promoter (<=1kb)	NA	3640697	1.60507	5.1759	0.0103938
peak_4453	C4_06830C_A	Downstream (<1kb)	CCT6	3642914	0.483065	8.47608	0.0103938
peak_3594	C3_06860C_A	Downstream (<1kb)	NA	3638541	0.456579	9.01671	0.0103938
peak_4620	C5_00880C_A	Promoter (<=1kb)	GIT3	3642634	0.454963	8.81438	0.0103938
peak_1100	C1_10000C_A	Promoter (<=1kb)	CPP1	3634865	-0.616284	6.70559	0.0103938
peak_5223	C6_00940C_A	Promoter (<=1kb)	NA	3644033	-0.783159	6.16907	0.0103938
peak_451	C1_03820W_A	Promoter (<=1kb)	PDR16	3644679	1.126	5.22776	0.0104048
peak_2917	C3_00860W_A	Promoter (<=1kb)	CSE4	3647750	0.455759	8.38577	0.0104048
peak_4917	C5_03930C_A	Promoter (<=1kb)	NA	3647447	-1.73917	4.40579	0.0104719
peak_2054	C2_03590C_A	Promoter (<=1kb)	CAP4	3637335	0.569855	6.99687	0.0108787
peak_3819	C4_00680W_A	Promoter (<=1kb)	NA	3645753	0.625806	6.50537	0.0109212
peak_7231	CR_08840C_A	5' UTR	NIT2	3641874	-0.587018	6.77123	0.0109212
peak_4701	C5_01680C_A	Promoter (<=1kb)	CCN1	3643735	-1.0173	5.4557	0.0109212
peak_2385	C2_06800C_A	Promoter (1-2kb)	NA	3643518	-0.495304	8.12636	0.0109744
peak_5231	C6_01070C_A	Promoter (<=1kb)	CIP1	3644018	1.41665	8.08141	0.0109851
peak_957	C1_08570C_A	Promoter (<=1kb)	PCL2	3646501	-0.865	6.03768	0.0110716
peak_3265	C3_04480C_A	Promoter (<=1kb)	RAS2	3635211	0.544203	7.60556	0.0112686
peak_1315	C1_11850W_A	Promoter (<=1kb)	NA	3642010	0.445912	9.28816	0.0112686
peak_6928	CR_07060C_A	Distal Intergenic	CRZ2	3645725	0.505198	7.62926	0.0113291
peak_2126	C2_04400W_A	Promoter (<=1kb)	NA	3645457	0.560142	7.09834	0.0113302
peak_4061	C4_02990C_A	Promoter (<=1kb)	GST2	3637937	0.685757	7.00331	0.0113506
peak_6168	CR_00040C_A	5' UTR	NA	3639675	-0.737278	6.1349	0.0114233
peak_595	C1_05140W_A	Downstream (<1kb)	BRG1	3647664	0.921887	5.59009	0.0114632
peak_2347	C2_06590C_A	5' UTR	GIT1	3646562	0.444505	8.69795	0.0114632
peak_7218	CR_08740W_A	Promoter (<=1kb)	NA	3642123	-0.589768	7.06466	0.0115272
peak_823	C1_07310C_A	Promoter (<=1kb)	tL(AAG)2	30515022	-0.762154	6.43078	0.0115272
peak_5871	C7_01650W_A	Promoter (<=1kb)	NA	3636984	0.73826	6.50679	0.0115403
peak_7232	CR_08840C_A	Promoter (<=1kb)	NIT2	3641874	-0.614008	6.5138	0.0115786
peak_4812	C5_02870C_A	Exon (C5_02870C_A/C5_02870C_A, exon 1 of 1)	NA	NA	1.04588	5.40708	0.0117246
peak_5272	C6_01530C_A	Downstream (<1kb)	PMP1	30515332	0.524378	7.57193	0.0117611
peak_958	C1_08570C_A	Promoter (<=1kb)	PCL2	3646501	-0.558974	7.0753	0.0117611
peak_4854	C5_03310C_A	Promoter (<=1kb)	PCL1	3646356	-0.646608	6.74124	0.0117611
peak_5489	C6_03700W_A	Promoter (<=1kb)	ALS1	3640280	0.47048	8.04403	0.0119876
peak_3789	C4_00360C_A	Promoter (<=1kb)	RCH1	3645002	0.520535	8.16383	0.0119879
peak_5505	C6_03800C_A	Downstream (<1kb)	NA	3640310	0.676445	6.34506	0.0120059
peak_4691	C5_01570C_A	5' UTR	SPO1	3647039	-0.973611	6.23748	0.0120059
peak_654	C1_05900W_A	Promoter (<=1kb)	NA	3639866	-0.47664	8.21361	0.0121738
peak_2409	C2_07070W_A	Promoter (<=1kb)	NA	3643501	0.623554	6.65446	0.0121779
peak_985	C1_08950W_A	Promoter (<=1kb)	PFK26	3634912	1.31442	5.30711	0.012205
peak_4016	C4_02540W_A	Promoter (1-2kb)	RGT1	3637920	0.588773	6.68665	0.0122252
peak_2655	C2_09580W_A	Promoter (<=1kb)	AGE2	3643810	-1.03429	5.27199	0.0122252
peak_7229	CR_08850W_A	Promoter (<=1kb)	NA	NA	-0.502005	8.13608	0.0124603
peak_6463	CR_02640W_A	Distal Intergenic	RFG1	3642570	-0.559335	7.17458	0.0124603
peak_1090	C1_09860C_A	Promoter (<=1kb)	TFA1	3634850	-0.608834	7.01301	0.0126535
peak_3606	C3_06950W_A	Promoter (<=1kb)	NA	3638507	-0.671575	6.30427	0.0126535
peak_4894	C5_03620W_A	Promoter (<=1kb)	BTS1	3646982	0.568343	7.63766	0.0126541
peak_4971	C5_04370C_A	Promoter (<=1kb)	PGA37	3636484	0.670179	6.36137	0.0127084
peak_382	C1_03190C_A	Downstream (<1kb)	ECM33	30514977	-0.519861	7.22802	0.0128688
peak_3237	C3_04090W_A	Promoter (<=1kb)	SBP1	3635280	0.421297	9.1628	0.012896
peak_4912	C5_03880C_A	Promoter (1-2kb)	NA	3647222	-0.930772	7.9415	0.0131575
peak_5205	C6_00840W_A	Downstream (1-2kb)	GPX2	3644009	0.908985	6.42871	0.0133626
peak_6847	CR_06310W_A	5' UTR	NA	3644860	-0.634621	6.48552	0.0134034
peak_2516	C2_08290C_A	Downstream (<1kb)	UCF1	3648170	1.28013	5.00059	0.0134528
peak_699	C1_06300W_A	Downstream (2-3kb)	NA	30515004	-0.489392	7.90856	0.0134976
peak_3901	C4_01360W_A	Promoter (1-2kb)	PGA53	3635599	1.24402	4.97767	0.0135344
peak_1218	C1_10930C_A	Promoter (<=1kb)	UBA4	3644432	0.747359	6.13969	0.0135344
peak_4807	C5_02840C_A	Promoter (<=1kb)	HSL1	3637810	-0.561151	7.75028	0.0138854
peak_3960	C4_02020W_A	Distal Intergenic	CAT2	3635659	-0.696458	6.28271	0.0139196
peak_706	C1_06320W_A	Promoter (<=1kb)	NA	3648118	-0.678866	6.19726	0.0141404
peak_5732	C7_00360W_A	Promoter (<=1kb)	DFI1	3638038	0.547109	7.26249	0.0141961
peak_6439	CR_02540W_A	Promoter (<=1kb)	CHO2	3647690	-0.633015	6.53584	0.0141961
peak_5171	C6_00580W_A	Promoter (<=1kb)	NA	NA	0.496424	8.09681	0.0142847
peak_2227	C2_05470W_A	Promoter (<=1kb)	COQ5	3643416	0.531802	8.48886	0.0143328
peak_3665	C3_07440W_A	Promoter (<=1kb)	TPI1	3638482	0.434569	8.76882	0.0143651
peak_3713	C3_07720C_A	Promoter (<=1kb)	NA	NA	-0.455384	9.1464	0.0143651
peak_5814	C7_00980W_A	Promoter (<=1kb)	PHM5	3637951	-0.611989	6.69496	0.0143651
peak_3422	C3_05570W_A	Promoter (<=1kb)	QDR2	3643661	1.59016	6.95104	0.0144156
peak_5828	C7_01170C_A	Promoter (<=1kb)	NA	3645914	0.652539	6.50345	0.0144156
peak_189	C1_01500W_A	Promoter (1-2kb)	NA	NA	0.458889	9.19374	0.0144156
peak_4171	C4_04060W_A	Downstream (<1kb)	NA	NA	0.457976	7.96571	0.0144407
peak_4300	C4_05300W_A	Promoter (<=1kb)	XKS1	3648306	0.538734	7.15366	0.0146444
peak_642	C1_05720W_A	Promoter (<=1kb)	NA	30515000	-0.544557	6.93952	0.0147035
peak_7026	CR_07880C_A	Promoter (<=1kb)	tG(GCC)1	30515432	-0.438299	8.48425	0.0147754
peak_6761	CR_05610C_A	Promoter (<=1kb)	SRR1	3647589	-0.76944	5.79915	0.014788
peak_6311	CR_01260W_A	Promoter (<=1kb)	NA	3640402	0.841458	5.80071	0.0148242
peak_1443	C1_13140C_A	Promoter (<=1kb)	TYE7	3636203	0.617789	6.60323	0.0148242
peak_3806	C4_00530C_A	5' UTR	NA	3645746	-0.615562	6.48671	0.0148242
peak_6552	CR_03480W_A	Promoter (<=1kb)	NA	3643199	-0.646508	6.55295	0.0148242
peak_2546	C2_08640C_A	Promoter (<=1kb)	PST2	3643909	0.606897	6.51783	0.014893
peak_3992	C4_02370C_A	Promoter (1-2kb)	PGA59	3637881	-0.657219	7.01217	0.0149502
peak_3078	C3_02470C_A	Promoter (<=1kb)	RPL9B	3638348	0.470845	7.67604	0.0150362
peak_4711	C5_01830C_A	Promoter (<=1kb)	HAL9	3643757	0.4844	7.83786	0.0151941
peak_3358	C3_05170W_A	Distal Intergenic	WOR2	3635230	-0.440333	8.67919	0.0153507
peak_5128	C6_00290W_A	Exon (C6_00290W_A/C6_00290W_A, exon 1 of 1)	NA	3646069	0.631249	9.43032	0.0153568
peak_1263	C1_11440C_A	Promoter (<=1kb)	GIN1	3644539	-0.663094	6.14306	0.0153568
peak_2476	C2_07900W_A	Promoter (1-2kb)	GDH2	3642295	0.796912	6.0799	0.0153869
peak_3504	C3_06200C_A	Downstream (<1kb)	MMS21	3642265	0.511338	7.77101	0.0154111
peak_929	C1_08330C_A	Promoter (<=1kb)	ADH2	3640751	-0.499072	7.32023	0.0154111
peak_7076	CR_08200C_A	Promoter (<=1kb)	NA	3642087	0.738831	8.43467	0.0154497
peak_197	C1_01510W_A	Downstream (2-3kb)	NA	3640229	-0.447877	8.82141	0.0154581
peak_5841	C7_01390W_A	Promoter (<=1kb)	NA	3645892	0.806329	5.63488	0.0154674
peak_3253	C3_04270C_A	Promoter (<=1kb)	CTP1	3635141	0.676763	6.75078	0.0154674
peak_936	C1_08370W_A	Promoter (<=1kb)	SDS24	3640756	-0.47208	8.72313	0.0155439
peak_29	C1_00190C_A	5' UTR	NA	3639337	-0.612601	6.40566	0.0155439
peak_2284	C2_05860C_A	Promoter (<=1kb)	NA	3647473	-0.613408	6.63948	0.0155439
peak_2923	C3_00920W_A	Promoter (1-2kb)	ATO1	3647761	-1.11305	6.69529	0.0155439
peak_2715	C2_10180W_A	5' UTR	IFR1	3643930	0.948095	5.62613	0.0156308
peak_2599	C2_09140C_A	Promoter (1-2kb)	MET10	3644088	-0.471724	7.72	0.0156308
peak_5781	C7_00760C_A	Promoter (<=1kb)	NA	3637960	0.440118	8.44173	0.0156655
peak_5066	C5_05320C_A	5' UTR	HIS1	3636501	0.715989	6.13175	0.015883
peak_5849	C7_01440W_A	Promoter (<=1kb)	NA	3636960	1.1812	9.69888	0.0159099
peak_2426	C2_07280W_A	Promoter (<=1kb)	NA	3643475	1.16746	7.25416	0.0159099
peak_3645	C3_07280C_A	Promoter (<=1kb)	NA	3638431	0.429899	9.07303	0.0159099
peak_1455	C1_13250W_A	Promoter (<=1kb)	NA	3636143	0.472031	8.36193	0.0159213
peak_3542	C3_06470W_A	Promoter (<=1kb)	AAF1	3642284	0.505508	7.15145	0.0160139
peak_4446	C4_06780C_A	Exon (C4_06780C_A/C4_06780C_A, exon 1 of 1)	OYE32	3642919	1.07172	5.96308	0.0160319
peak_3073	C3_02390W_A	Promoter (<=1kb)	NA	3636615	1.05865	5.24702	0.0160319
peak_2224	C2_05450C_A	Downstream (<1kb)	MDJ2	3643437	0.9848	5.31246	0.0160319
peak_2704	C2_10040W_A	5' UTR	NA	NA	0.520244	7.84191	0.0160319
peak_2267	C2_05690C_A	Promoter (<=1kb)	YTH1	3645572	0.432306	8.20054	0.0160319
peak_777	C1_07040C_A	Promoter (<=1kb)	NA	3639533	-0.566759	6.975	0.0160319
peak_1885	C2_02180W_A	Promoter (<=1kb)	NA	3635752	0.706189	6.215	0.0161682
peak_4248	C4_04770C_A	Promoter (<=1kb)	MNN22	3641117	0.494738	7.57871	0.0161682
peak_6962	CR_07400C_A	Promoter (<=1kb)	LPD1	3646037	-0.410064	9.33265	0.0161682
peak_4589	C5_00570W_A	Promoter (<=1kb)	NA	3641589	0.494795	8.27421	0.0161799
peak_3591	C3_06850W_A	5' UTR	FCR1	3638542	0.469211	7.56985	0.0161799
peak_4660	C5_01130W_A	Promoter (<=1kb)	CYC3	3642621	-0.716419	6.00942	0.0161799
peak_855	C1_07660W_A	Promoter (<=1kb)	NA	3646656	-0.746198	5.80923	0.0161799
peak_5010	C5_04820W_A	Distal Intergenic	NA	NA	-0.634998	6.39939	0.0165479
peak_330	C1_02720W_A	Distal Intergenic	NA	3636825	-0.472584	7.3863	0.0165656
peak_5423	C6_03100W_A	Promoter (1-2kb)	SHE3	3639277	-0.786631	5.66615	0.0166037
peak_4190	C4_04320W_A	Promoter (<=1kb)	FRE10	3646841	-1.14742	5.41287	0.0166463
peak_5298	C6_01720C_A	Promoter (1-2kb)	SUR7	3641610	-0.577576	6.52043	0.0169718
peak_2093	C2_04040C_A	Promoter (<=1kb)	DCK2	3637384	-0.675234	6.14938	0.0169718
peak_1820	C2_01600C_A	Promoter (<=1kb)	CDC55	3635785	0.428721	8.44011	0.0170133
peak_3386	C3_05290C_A	Promoter (<=1kb)	NA	3635203	-0.432541	8.27018	0.0170133
peak_787	C1_07120W_A	Distal Intergenic	GAP4	3644463	-0.48217	7.97291	0.0170133
peak_2038	C2_03500W_A	Distal Intergenic	NA	3637345	0.785494	7.03795	0.0170672
peak_1447	C1_13190W_A	Promoter (<=1kb)	NA	3636163	0.857497	5.48537	0.0170713
peak_5500	C6_03770C_A	Promoter (<=1kb)	ORM1	3640307	0.433153	8.31693	0.0170713
peak_709	C1_06330W_A	Distal Intergenic	NA	NA	-0.92512	5.64079	0.0171449
peak_753	C1_06820W_A	5' UTR	NA	3639493	0.561977	6.58335	0.0173868
peak_3735	C3_07820W_A	Exon (C3_07820W_A/C3_07820W_A, exon 1 of 1)	NA	3647463	-0.684939	6.13691	0.0173988
peak_5740	C7_00420C_A	Promoter (<=1kb)	NA	3638032	0.537728	6.86612	0.0174399
peak_4593	C5_00590W_A	Downstream (1-2kb)	PET9	3641587	-0.429157	8.14547	0.0174399
peak_3201	C3_03860W_A	Exon (C3_03870C_A/C3_03870C_A, exon 1 of 1)	NA	3645626	0.602789	6.72799	0.0175728
peak_1425	C1_13070C_A	Promoter (<=1kb)	FAD3	3636124	-0.724701	5.76986	0.0176236
peak_1951	C2_02920W_A	Promoter (<=1kb)	NA	3643016	0.428242	8.24606	0.0176895
peak_7531	CR_10840C_A	Promoter (<=1kb)	XYL2	3638961	0.530866	7.36337	0.0177857
peak_337	C1_02780W_A	Promoter (<=1kb)	NA	3636871	1.28295	4.82169	0.0178555
peak_6930	CR_07060C_A	Downstream (2-3kb)	CRZ2	3645725	1.12684	5.02627	0.0178995
peak_4407	C4_06460C_A	Promoter (<=1kb)	NA	3642791	-0.523001	7.33375	0.0178995
peak_101	C1_00780C_A	Promoter (1-2kb)	HGC1	3639349	-0.471132	7.73078	0.0180225
peak_652	C1_05870W_A	Promoter (<=1kb)	PRN3	3639878	0.592684	7.5047	0.0180484
peak_5251	C6_01360W_A	Promoter (<=1kb)	NA	3641608	0.448493	8.17019	0.0180484
peak_6675	CR_04820W_A	Promoter (<=1kb)	NA	3647298	0.445592	7.86867	0.0180484
peak_2583	C2_09000C_A	Promoter (<=1kb)	NA	3645782	0.444358	7.76631	0.0180484
peak_944	C1_08400C_A	Promoter (<=1kb)	GCV2	3646505	-0.447977	8.18839	0.0180484
peak_702	C1_06300W_A	Promoter (<=1kb)	NA	30515004	-0.491628	8.11963	0.0180484
peak_3737	C3_07840C_A	Exon (C3_07830W_A/C3_07830W_A, exon 1 of 1)	NA	3647465	-0.616883	6.30254	0.0180484
peak_3446	C3_05710W_A	Exon (C3_05710W_A/C3_05710W_A, exon 1 of 1)	RCT1	3641727	-0.566904	6.82781	0.0182691
peak_2639	C2_09460C_A	Promoter (1-2kb)	RHA1	3647713	0.662019	6.5654	0.0183552
peak_2189	C2_05070W_A	Exon (C2_05070W_A/C2_05070W_A, exon 1 of 1)	FRE9	3643452	0.725338	5.81756	0.0184886
peak_171	C1_01290C_A	Promoter (<=1kb)	NA	3640184	0.408562	8.62673	0.0184886
peak_4162	C4_04010W_A	Promoter (1-2kb)	NA	3641218	-0.742351	5.99975	0.0187273
peak_5846	C7_01430C_A	Downstream (<1kb)	NA	3636961	0.502175	7.69458	0.0187484
peak_5323	C6_02010C_A	Exon (C6_02010C_A/C6_02010C_A, exon 1 of 1)	GPD2	3644563	0.474781	8.43032	0.0189267
peak_5291	C6_01670W_A	Promoter (<=1kb)	MAE1	3641615	-0.635365	6.47838	0.0189964
peak_5582	C6_04380W_A	Promoter (1-2kb)	ALS2	3645724	-0.670223	6.58813	0.019184
peak_6597	CR_03880W_A	Distal Intergenic	IFF9	3641008	-1.06724	5.42597	0.0193737
peak_4832	C5_03130W_A	Distal Intergenic	SUT1	3637706	1.10042	6.02857	0.0193952
peak_4343	C4_05780C_A	Promoter (<=1kb)	CFL2	3641811	-0.756927	5.6903	0.0193952
peak_2888	C3_00700W_A	Promoter (<=1kb)	VPS8	3640534	0.564255	6.88986	0.0195905
peak_1048	C1_09430W_A	Promoter (<=1kb)	NA	3634855	-0.469815	7.99583	0.0195905
peak_473	C1_03990W_A	Promoter (<=1kb)	NA	3646424	0.652308	6.08057	0.0197138
peak_3990	C4_02370C_A	Downstream (<1kb)	PGA59	3637881	-0.511826	7.75728	0.0199895
peak_7030	CR_07890W_A	Exon (CR_07890W_A/CR_07890W_A, exon 1 of 1)	EFG1	3644145	-0.524264	7.16262	0.0200973
peak_5011	C5_04820W_A	Distal Intergenic	NA	NA	-0.498065	7.84613	0.0201632
peak_5677	C6_04650W_A	Exon (C6_04650W_A/C6_04650W_A, exon 1 of 1)	NA	3645979	-0.502644	7.12202	0.0201632
peak_6245	CR_00520C_A	Promoter (<=1kb)	CRM1	3639721	0.512395	6.85761	0.0202772
peak_598	C1_05150C_A	5' UTR	NA	3642469	0.381601	10.0299	0.0203583
peak_3614	C3_07020W_A	Promoter (1-2kb)	SSN6	3638518	-0.593435	8.22902	0.0204323
peak_4264	C4_04860W_A	Promoter (1-2kb)	NA	3641161	-0.467855	8.2974	0.0205268
peak_2095	C2_04050C_A	Promoter (1-2kb)	DCK1	3637383	0.473641	7.3857	0.0205386
peak_2763	C2_10560C_A	Promoter (<=1kb)	ZSF1	3641257	0.465611	8.92925	0.0206291
peak_5520	C6_03850C_A	Promoter (1-2kb)	IHD1	3640291	-0.887487	5.47727	0.0206329
peak_5882	C7_01720W_A	Promoter (<=1kb)	NA	3637011	0.785045	6.01116	0.0207642
peak_2172	C2_04920W_A	Promoter (<=1kb)	tG(GCC)3	30515115	-0.479071	7.85107	0.0207642
peak_4365	C4_05950C_A	Promoter (<=1kb)	tT(UGU)2	30515278	-0.5123	6.94339	0.0207642
peak_3389	C3_05320W_A	Promoter (<=1kb)	NA	3643648	-0.594424	7.0825	0.0207809
peak_2708	C2_10070W_A	Promoter (<=1kb)	NA	3643946	0.497901	6.95819	0.020869
peak_2481	C2_07920W_A	5' UTR	NA	3642294	1.19969	6.32356	0.0208878
peak_2666	C2_09710C_A	Promoter (<=1kb)	NA	3643786	0.584564	6.40151	0.0210608
peak_678	C1_06140C_A	Promoter (<=1kb)	NA	NA	-0.532139	6.65231	0.021095
peak_1276	C1_11480W_A	Promoter (<=1kb)	PHO84	3645348	-1.04098	5.26808	0.021095
peak_1524	C1_13870W_A	Promoter (<=1kb)	MET3	3636132	0.438292	7.79949	0.0211645
peak_2209	C2_05260W_A	Promoter (1-2kb)	BUD14	3643469	-0.535632	7.16513	0.0211668
peak_4116	C4_03510C_A	Promoter (1-2kb)	HWP2	3646803	0.669068	6.48575	0.0214135
peak_1169	C1_10460W_A	Promoter (<=1kb)	NA	3647183	0.732678	6.04216	0.0214286
peak_2413	C2_07130C_A	Promoter (<=1kb)	RCK2	3643507	0.894605	5.37431	0.0215384
peak_5261	C6_01450C_A	5' UTR	NA	3641624	-0.660905	5.97186	0.0215384
peak_2273	C2_05750W_A	Promoter (<=1kb)	NA	3645577	-1.14341	4.90683	0.021739
peak_4166	C4_04030W_A	Promoter (<=1kb)	JEN2	3641214	-0.748554	6.00312	0.0217885
peak_7466	CR_10340W_A	Promoter (1-2kb)	PTP3	3638940	1.46601	6.24183	0.0219391
peak_5324	C6_02010C_A	Promoter (<=1kb)	GPD2	3644563	0.380068	10.7333	0.0219571
peak_7015	CR_07810W_A	Promoter (<=1kb)	YHB5	3647343	0.498595	7.96945	0.0219694
peak_3945	C4_01820C_A	Downstream (<1kb)	NA	3635594	0.659759	6.45859	0.0219852
peak_7467	CR_10340W_A	Promoter (1-2kb)	PTP3	3638940	0.506268	7.13929	0.0224351
peak_5097	C6_00120W_A	Promoter (<=1kb)	NA	30515323	0.782665	5.53394	0.0225063
peak_3900	C4_01360W_A	Promoter (1-2kb)	PGA53	3635599	1.48668	4.42759	0.0225351
peak_2248	C2_05630C_A	Promoter (<=1kb)	tS(AGA)4	30515126	-0.450787	7.3452	0.0225351
peak_6753	CR_05570C_A	Exon (CR_05570C_A/CR_05570C_A, exon 1 of 1)	RNR3	3647591	-0.64332	6.27793	0.0225874
peak_1180	C1_10590W_A	Promoter (<=1kb)	NA	30515042	-0.681131	6.40813	0.0226413
peak_4587	C5_00560W_A	Distal Intergenic	NA	3648267	0.515834	7.19558	0.0227551
peak_2850	C3_00310C_A	Promoter (<=1kb)	NA	3640523	0.428781	10.9971	0.0227551
peak_3756	C3_07980C_A	Exon (C3_07980C_A/C3_07980C_A, exon 1 of 1)	NA	NA	-0.583707	6.48316	0.0228664
peak_3147	C3_03350W_A	Promoter (<=1kb)	tE(UUC)1	30515196	-0.431585	8.64824	0.0230047
peak_4262	C4_04850C_A	Promoter (1-2kb)	CSR1	3641162	-0.686157	5.80576	0.02302
peak_164	C1_01220C_A	Promoter (<=1kb)	NA	3640210	0.56827	6.52182	0.0230499
peak_2487	C2_07980W_A	Exon (C2_07980W_A/C2_07980W_A, exon 1 of 1)	NA	3642312	-0.67427	6.05886	0.0230816
peak_1092	C1_09880C_A	5' UTR	BUD31	3634796	-0.73588	5.64173	0.0233012
peak_5222	C6_00940C_A	Promoter (<=1kb)	NA	3644033	-0.622835	6.61217	0.0233081
peak_5312	C6_01900C_A	Promoter (<=1kb)	DOG1	3641597	0.490554	7.37916	0.0233343
peak_3683	C3_07540C_A	Promoter (<=1kb)	NA	3638526	-0.730114	5.72513	0.0233359
peak_5371	C6_02480W_A	Exon (C6_02480W_A/C6_02480W_A, exon 1 of 1)	NA	3639170	1.20802	4.95523	0.0233564
peak_1727	C2_00690W_A	Promoter (<=1kb)	NA	3638885	0.760933	5.6482	0.0233828
peak_5187	C6_00800C_A	Promoter (<=1kb)	NA	3647069	0.402687	8.67962	0.0234108
peak_2472	C2_07850C_A	Promoter (<=1kb)	tM(CAU)2	30515145	-0.432467	8.09196	0.0234108
peak_3716	C3_07730W_A	Promoter (<=1kb)	WOR4	3638454	-0.486605	7.46528	0.0234108
peak_6298	CR_01050C_A	Promoter (<=1kb)	NA	3640384	-0.5357	6.67463	0.0234108
peak_116	C1_00850W_A	Promoter (<=1kb)	IHD2	3639359	-0.816283	5.67268	0.0234108
peak_4776	C5_02460C_A	Promoter (<=1kb)	ECM331	3637731	-1.0186	5.36873	0.0234108
peak_3087	C3_02610C_A	Promoter (<=1kb)	GLX3	3638325	0.401838	8.42258	0.0234205
peak_888	C1_07980C_A	Promoter (<=1kb)	NA	3640696	0.886215	6.39394	0.0234792
peak_5387	C6_02670C_A	Downstream (<1kb)	WSC2	3639225	-0.428528	7.60591	0.0235027
peak_2749	C2_10490C_A	Exon (C2_10480W_A/C2_10480W_A, exon 1 of 1)	tV(UAC)1	30515165	-0.415098	8.6626	0.0236498
peak_988	C1_08970W_A	Promoter (<=1kb)	NA	30515033	0.787871	5.80464	0.0236706
peak_4913	C5_03890C_A	Promoter (<=1kb)	NA	30515312	-0.387432	10.2502	0.0238705
peak_679	C1_06150W_A	5' UTR	NA	3639847	-0.461627	7.61881	0.0238705
peak_4856	C5_03310C_A	Promoter (1-2kb)	PCL1	3646356	-0.687775	7.09303	0.0238861
peak_1278	C1_11480W_A	Downstream (<1kb)	PHO84	3645348	-0.757582	5.60838	0.0238861
peak_4686	C5_01510W_A	Exon (C5_01520C_A/C5_01520C_A, exon 1 of 1)	SMD3	3647060	1.11184	5.11415	0.0239263
peak_4887	C5_03520W_A	Promoter (<=1kb)	NA	3646970	0.809866	5.86884	0.0239573
peak_791	C1_07120W_A	Promoter (<=1kb)	GAP4	3644463	-0.576711	7.37941	0.0239953
peak_2357	C2_06640C_A	Promoter (<=1kb)	VAS1	3648340	1.00918	5.17153	0.0240212
peak_1522	C1_13850C_A	Promoter (<=1kb)	DAL7	3636130	1.13629	8.97547	0.0242972
peak_6942	CR_07150W_A	Promoter (<=1kb)	GLK1	3648348	0.648754	6.01521	0.0247208
peak_2324	C2_06420C_A	Promoter (<=1kb)	RTS1	3646557	0.606783	6.85596	0.0247925
peak_3369	C3_05180W_A	Promoter (<=1kb)	RHB1	3635232	-0.540935	6.97413	0.0247946
peak_1588	C1_14220C_A	Promoter (<=1kb)	FTR2	3643303	-0.761496	5.72025	0.0249377
peak_3093	C3_02660W_A	5' UTR	NA	3638404	-0.80529	5.61227	0.0249377
peak_6221	CR_00310C_A	Promoter (<=1kb)	NA	3639715	-0.429724	7.94024	0.0254827
peak_3859	C4_01010C_A	Promoter (<=1kb)	DAG7	3635607	-0.430534	8.25805	0.0255539
peak_4444	C4_06780C_A	Exon (C4_06770W_A/C4_06770W_A, exon 1 of 1)	OYE32	3642919	0.742511	6.49613	0.0256222
peak_5494	C6_03710W_A	Promoter (1-2kb)	ALS9	3640281	0.850381	5.59437	0.0256737
peak_5236	C6_01120C_A	Downstream (<1kb)	NA	3644054	-0.915956	5.33885	0.0256737
peak_2854	C3_00360W_A	Promoter (<=1kb)	NA	3640542	0.53369	7.17189	0.0256951
peak_440	C1_03730C_A	Promoter (<=1kb)	MNS1	3644692	-0.609841	6.20235	0.0256951
peak_3164	C3_03460C_A	Promoter (<=1kb)	NA	3638359	0.452796	8.38575	0.0258608
peak_5510	C6_03830W_A	Promoter (<=1kb)	SAL6	3640289	0.472928	7.25884	0.0258885
peak_2580	C2_09000C_A	5' UTR	NA	3645782	-0.78147	5.51531	0.0258885
peak_4950	C5_04130C_A	Exon (C5_04130C_A/C5_04130C_A, exon 1 of 1)	CHT2	3636523	-0.84802	5.45456	0.0259998
peak_3138	C3_03230C_A	Promoter (<=1kb)	NA	3638316	0.563678	7.26389	0.026136
peak_1506	C1_13690C_A	Promoter (<=1kb)	NA	30515076	0.448789	7.24113	0.0263235
peak_6063	C7_03490W_A	Promoter (<=1kb)	GYP7	3646245	0.638797	5.99932	0.0263271
peak_4013	C4_02540W_A	Distal Intergenic	RGT1	3637920	0.754876	5.89144	0.0264041
peak_4168	C4_04050C_A	Promoter (<=1kb)	RHD3	3641212	0.453877	7.44649	0.0266281
peak_1226	C1_11060C_A	Exon (C1_11060C_A/C1_11060C_A, exon 2 of 2)	RPL2	30515049	-0.60043	6.32667	0.0267392
peak_3007	C3_01680C_A	5' UTR	NA	3636605	0.668102	5.92361	0.0267998
peak_6068	C7_03580C_A	Promoter (<=1kb)	NA	3646238	0.512468	6.87193	0.0270094
peak_6709	CR_05180C_A	Promoter (<=1kb)	SDH2	3646397	0.469156	7.17824	0.0270094
peak_1023	C1_09200W_A	Promoter (<=1kb)	LYS142	3634896	-0.556973	6.50629	0.0271145
peak_6764	CR_05610C_A	Promoter (1-2kb)	SRR1	3647589	-0.735137	5.76329	0.0272154
peak_293	C1_02370C_A	Promoter (<=1kb)	NA	3644576	-1.04229	5.23911	0.0272254
peak_3852	C4_00960W_A	Promoter (<=1kb)	PTC8	3635674	0.443297	7.32231	0.0273423
peak_5826	C7_01150W_A	Promoter (<=1kb)	NA	3645913	0.434894	8.31491	0.0274935
peak_6563	CR_03610C_A	Promoter (<=1kb)	VTC3	3643206	-0.424202	7.56043	0.0275721
peak_6071	C7_03590C_A	Promoter (<=1kb)	NA	3646239	-0.454632	7.04328	0.0278247
peak_6361	CR_01870C_A	Promoter (<=1kb)	NA	NA	0.568287	6.25372	0.0279206
peak_1306	C1_11770C_A	Promoter (<=1kb)	NA	3645327	-0.714236	5.75622	0.0279282
peak_3355	C3_05170W_A	Distal Intergenic	WOR2	3635230	-0.664047	5.7616	0.0279804
peak_1109	C1_10050W_A	5' UTR	NA	3634811	0.818061	5.58679	0.0282131
peak_6466	CR_02650C_A	Downstream (1-2kb)	DRE2	3642571	-0.39936	8.72957	0.0282131
peak_7242	CR_08880C_A	Promoter (<=1kb)	NA	3641878	-0.604919	6.26519	0.0283306
peak_4765	C5_02340C_A	Promoter (<=1kb)	CST20	3637790	-0.403657	8.14331	0.0285104
peak_5496	C6_03710W_A	Promoter (<=1kb)	ALS9	3640281	0.437147	7.54631	0.0285457
peak_2344	C2_06590C_A	5' UTR	GIT1	3646562	-0.67435	6.15056	0.0285457
peak_6632	CR_04200W_A	Exon (CR_04200W_A/CR_04200W_A, exon 1 of 1)	YDJ1	3640939	-0.707139	5.74481	0.0285457
peak_1299	C1_11700C_A	Exon (C1_11700C_A/C1_11700C_A, exon 1 of 1)	MRF1	3645321	1.02433	5.21089	0.0285796
peak_1459	C1_13270W_A	Promoter (<=1kb)	NA	3636144	0.493709	6.84312	0.0286849
peak_4450	C4_06820C_A	Promoter (<=1kb)	CZF1	3642915	0.393044	8.80194	0.0288249
peak_3579	C3_06790W_A	Promoter (<=1kb)	TRY6	3638499	-0.459258	7.2874	0.0288249
peak_1177	C1_10580C_A	Promoter (<=1kb)	NA	3647679	-0.634488	6.50507	0.0288997
peak_2139	C2_04560W_A	Promoter (<=1kb)	KTR2	3645443	0.543351	6.38682	0.0293398
peak_4635	C5_01070C_A	Promoter (1-2kb)	NA	3642627	0.805913	5.67246	0.0294269
peak_4599	C5_00670C_A	Promoter (<=1kb)	HMS1	3641570	1.08391	5.0335	0.0294615
peak_5256	C6_01410C_A	Exon (C6_01400W_A/C6_01400W_A, exon 1 of 1)	OYE2	3641603	1.36729	4.86376	0.0294719
peak_5955	C7_02270W_A	Promoter (<=1kb)	LDG3	3637001	0.572817	6.82709	0.0295028
peak_4702	C5_01680C_A	Promoter (<=1kb)	CCN1	3643735	-0.456229	7.92864	0.0295028
peak_6237	CR_00450C_A	Promoter (1-2kb)	NA	30515367	-0.464505	7.14857	0.0295028
peak_4161	C4_04000W_A	Distal Intergenic	MET4	3641219	-0.519066	6.68471	0.0295028
peak_4189	C4_04320W_A	Promoter (1-2kb)	FRE10	3646841	-0.723801	5.60913	0.0295028
peak_1250	C1_11280W_A	Promoter (<=1kb)	NA	3644554	0.442879	7.59422	0.0296477
peak_5327	C6_02030C_A	Promoter (<=1kb)	NA	3647562	0.393766	8.47151	0.0296477
peak_6044	C7_03300C_A	Downstream (<1kb)	LIP8	3646727	-0.600433	6.41379	0.0296477
peak_2759	C2_10540W_A	Exon (C2_10550C_A/C2_10550C_A, exon 1 of 1)	NA	3641200	-0.637072	6.27604	0.0296477
peak_1613	C1_14350W_A	Exon (C1_14350W_A/C1_14350W_A, exon 1 of 1)	NA	3643281	-0.787778	5.4593	0.0297097
peak_313	C1_02560W_A	Promoter (<=1kb)	NA	NA	-0.591874	6.24499	0.0299932
peak_7238	CR_08870W_A	Promoter (<=1kb)	PEX13	3641877	-0.412138	7.63079	0.0300714
peak_1453	C1_13240W_A	Promoter (<=1kb)	NA	3636167	0.473543	6.95264	0.030238
peak_3275	C3_04520C_A	Promoter (1-2kb)	ADE2	3635259	0.567342	6.19942	0.0302665
peak_137	C1_01030W_A	Exon (C1_01030W_A/C1_01030W_A, exon 1 of 1)	HMT1	3640182	-0.63329	5.9983	0.0302915
peak_5720	C7_00280W_A	Promoter (1-2kb)	HGT12	3638048	-0.513711	6.5124	0.0303732
peak_4412	C4_06480C_A	Promoter (1-2kb)	CEK1	3642789	-0.907164	5.35501	0.0303732
peak_2964	C3_01250W_A	Promoter (<=1kb)	PMC1	3636627	-0.402365	8.67112	0.0304508
peak_866	C1_07780W_A	Promoter (<=1kb)	NA	3647955	-0.584251	6.22754	0.0304965
peak_2658	C2_09590C_A	Promoter (<=1kb)	NA	3643800	0.660947	5.81885	0.0305655
peak_4790	C5_02640W_A	Promoter (<=1kb)	NA	3637785	0.625603	6.03521	0.0307039
peak_2649	C2_09530W_A	Exon (C2_09530W_A/C2_09530W_A, exon 1 of 1)	EAP1	3643814	-0.398779	8.0747	0.0307039
peak_7044	CR_07970C_A	Promoter (1-2kb)	NA	NA	-0.402086	7.84532	0.0307039
peak_1547	C1_13940W_A	Distal Intergenic	SIM1	3636185	0.835049	6.40347	0.0307113
peak_2177	C2_04940C_A	Promoter (<=1kb)	ITR1	3643440	0.476296	6.86412	0.0308884
peak_2358	C2_06670C_A	Promoter (<=1kb)	DBF2	3648101	-0.986996	5.24717	0.0308884
peak_1374	C1_12450C_A	Promoter (<=1kb)	IRA2	3642011	0.461418	6.93172	0.0309412
peak_2210	C2_05260W_A	Promoter (<=1kb)	BUD14	3643469	-0.881075	6.27067	0.0310771
peak_3996	C4_02390W_A	5' UTR	PGA62	3637879	-0.369677	8.87783	0.0311402
peak_2295	C2_06000W_A	Exon (C2_06000W_A/C2_06000W_A, exon 1 of 1)	LAS1	3644073	-1.18766	4.75537	0.0311402
peak_5435	C6_03250W_A	Promoter (1-2kb)	BMT4	3639182	-1.38437	4.35398	0.0311402
peak_2916	C3_00850C_A	Promoter (<=1kb)	NA	3647748	0.409697	7.70231	0.0311463
peak_2793	C2_10780C_A	Promoter (<=1kb)	PSO2	3641241	-0.599074	6.29055	0.0312912
peak_3495	C3_06180C_A	Promoter (<=1kb)	TSA1	3642269	1.35779	4.43677	0.0313185
peak_7404	CR_09880W_A	Exon (CR_09880W_A/CR_09880W_A, exon 1 of 1)	DEF1	3639023	-0.62082	6.21627	0.0313197
peak_951	C1_08490W_A	Exon (C1_08490W_A/C1_08490W_A, exon 1 of 1)	NA	3646492	0.548232	6.91876	0.0313753
peak_7364	CR_09530C_A	Exon (CR_09530C_A/CR_09530C_A, exon 1 of 1)	NA	3647101	-0.728585	5.79492	0.0314475
peak_6840	CR_06230W_A	Promoter (<=1kb)	NA	3644867	-0.602626	6.36902	0.0315183
peak_3086	C3_02600C_A	Promoter (<=1kb)	SLC1	3638324	0.642024	6.54279	0.0315968
peak_1908	C2_02390W_A	Promoter (<=1kb)	NA	3635829	0.557589	6.35466	0.031661
peak_1923	C2_02560W_A	Promoter (<=1kb)	NA	NA	0.504983	6.61073	0.031661
peak_4655	C5_01120W_A	Distal Intergenic	NA	NA	-1.01059	5.021	0.0320457
peak_4323	C4_05590W_A	Promoter (<=1kb)	NA	3641776	0.515338	6.52449	0.0322037
peak_4035	C4_02720C_A	Promoter (1-2kb)	NA	3637857	0.348491	10.8845	0.0322037
peak_1277	C1_11480W_A	Exon (C1_11480W_A/C1_11480W_A, exon 1 of 1)	PHO84	3645348	-1.08927	4.97684	0.0322037
peak_2569	C2_08910C_A	Promoter (<=1kb)	NA	3645798	-0.40529	7.68984	0.0322165
peak_5816	C7_01000C_A	Promoter (<=1kb)	NA	3638022	-0.678366	6.00571	0.0322359
peak_7392	CR_09780C_A	Promoter (1-2kb)	IFA14	3639012	0.537547	6.33633	0.0325598
peak_6723	CR_05330W_A	Promoter (1-2kb)	NA	30515404	0.406017	9.75378	0.0325598
peak_3036	C3_01940C_A	Exon (C3_01930W_A/C3_01930W_A, exon 1 of 1)	NA	3636600	1.05327	5.00275	0.0325941
peak_1709	C2_00480C_A	Promoter (<=1kb)	PHHB	3638871	0.624395	6.77668	0.0325941
peak_3467	C3_05910W_A	Promoter (<=1kb)	ZCF35	3641740	0.451969	7.81387	0.0325941
peak_4870	C5_03430W_A	Downstream (2-3kb)	NA	3646346	-0.539854	6.92446	0.0325941
peak_3107	C3_02810C_A	Promoter (<=1kb)	FAA21	3638418	-0.681504	6.30292	0.0325941
peak_5463	C6_03480W_A	5' UTR	YMX6	3640255	0.431992	7.29975	0.0330156
peak_2925	C3_00920W_A	Promoter (<=1kb)	ATO1	3647761	-0.585669	6.25421	0.0330156
peak_381	C1_03190C_A	Downstream (1-2kb)	ECM33	30514977	-0.537107	6.64596	0.0330852
peak_5759	C7_00650W_A	5' UTR	NA	NA	-0.743545	5.61106	0.0331404
peak_3424	C3_05570W_A	Exon (C3_05570W_A/C3_05570W_A, exon 1 of 1)	QDR2	3643661	0.699865	6.11327	0.033244
peak_2868	C3_00550C_A	Promoter (<=1kb)	HRK1	3640586	1.02895	8.71496	0.0333035
peak_6507	CR_02920C_A	Promoter (1-2kb)	AQY1	3642587	0.391234	8.20936	0.0334594
peak_5308	C6_01860C_A	Promoter (<=1kb)	HCH1	3641626	0.54037	7.16083	0.0334616
peak_4105	C4_03430W_A	Promoter (<=1kb)	MOH1	3646809	0.375805	8.18283	0.033961
peak_4901	C5_03750W_A	Downstream (<1kb)	FAV2	3647236	-0.593856	6.15493	0.033961
peak_3225	C3_04000C_A	Promoter (<=1kb)	CTN3	3647396	-0.701737	5.96764	0.0342908
peak_3857	C4_00980C_A	Promoter (1-2kb)	MRV1	3635610	-0.526368	6.42057	0.0343619
peak_2486	C2_07970W_A	Promoter (<=1kb)	tI(AAU)2	30515147	-0.425518	7.9349	0.0344094
peak_6901	CR_06860C_A	Promoter (<=1kb)	ARO10	3647320	-0.460647	7.14005	0.0344094
peak_3290	C3_04580C_A	Promoter (<=1kb)	STP1	3635152	-0.470748	7.489	0.0344401
peak_4271	C4_04920W_A	Exon (C4_04920W_A/C4_04920W_A, exon 1 of 1)	NA	3641172	-0.676491	5.73832	0.0345609
peak_5085	C5_05480W_A	Promoter (<=1kb)	DES1	3636529	0.597135	6.5519	0.0345618
peak_6765	CR_05620C_A	Downstream (<1kb)	MTG2	3646693	-0.633987	6.05332	0.0345949
peak_534	C1_04590W_A	Downstream (<1kb)	NA	30514987	0.520952	7.06677	0.034631
peak_6026	C7_03200C_A	Exon (C7_03220C_A/C7_03220C_A, exon 1 of 1)	NA	3641342	0.772798	6.25404	0.0348778
peak_2039	C2_03520C_A	Distal Intergenic	ADAEC	3637342	0.423913	8.76226	0.0348963
peak_3943	C4_01800W_A	Promoter (<=1kb)	NA	3635595	0.490169	6.82846	0.0349248
peak_2811	C3_00040W_A	Exon (C3_00030C_A/C3_00030C_A, exon 1 of 1)	NA	NA	-0.393212	8.29888	0.0350734
peak_3077	C3_02460C_A	Promoter (<=1kb)	PHA2	3638346	-0.420808	7.28551	0.0350734
peak_391	C1_03270W_A	Promoter (<=1kb)	NA	3636900	0.545259	6.56485	0.0353289
peak_3108	C3_02830W_A	Promoter (<=1kb)	TFC4	3638420	-0.7304	5.49427	0.0353289
peak_3824	C4_00740W_A	Exon (C4_00740W_A/C4_00740W_A, exon 1 of 1)	NA	3645764	-0.915447	5.07701	0.0353289
peak_1187	C1_10650W_A	Promoter (<=1kb)	APN2	3647674	0.539505	6.39545	0.0353324
peak_728	C1_06540C_A	Promoter (<=1kb)	NA	3639520	-0.566652	6.50495	0.0353324
peak_6172	CR_00050W_A	Exon (CR_00050W_A/CR_00050W_A, exon 1 of 1)	INO2	3639674	-0.539438	6.41859	0.0355166
peak_738	C1_06610C_A	Promoter (<=1kb)	HAK1	3639546	1.41425	6.70947	0.0355577
peak_4936	C5_04030W_A	Downstream (1-2kb)	NA	3647737	-0.366751	8.52052	0.0355577
peak_1697	C2_00340C_A	Promoter (<=1kb)	ARO8	3638828	0.499347	6.56515	0.0356293
peak_6831	CR_06130C_A	Downstream (1-2kb)	NA	NA	-0.572896	6.62557	0.0356293
peak_1687	C2_00240C_A	Exon (C2_00230W_A/C2_00230W_A, exon 1 of 1)	SOD6	3638899	0.513466	7.31112	0.0360549
peak_885	C1_07980C_A	5' UTR	NA	3640696	0.69614	6.36935	0.0361143
peak_1736	C2_00760C_A	Promoter (<=1kb)	NA	3638910	0.559983	7.23203	0.0361218
peak_2047	C2_03530W_A	5' UTR	NA	3637341	0.379638	8.22667	0.0362385
peak_433	C1_03700C_A	Promoter (<=1kb)	tT(CGU)1	30514983	-0.707214	5.67428	0.0362385
peak_5797	C7_00900W_A	Exon (C7_00900W_A/C7_00900W_A, exon 1 of 1)	NA	NA	0.496701	7.6332	0.0362626
peak_1840	C2_01750C_A	Distal Intergenic	NA	3635734	-0.714087	5.86804	0.0362626
peak_3977	C4_02290W_A	Exon (C4_02290W_A/C4_02290W_A, exon 1 of 1)	LAB5	3637893	-0.590464	6.11522	0.0365105
peak_265	C1_02110C_A	Downstream (2-3kb)	HGT2	3644579	0.377724	8.62557	0.0365263
peak_7233	CR_08860W_A	Promoter (<=1kb)	PDK2	3641876	-0.504115	6.5764	0.0365442
peak_4265	C4_04860W_A	Promoter (<=1kb)	NA	3641161	-0.461517	8.32689	0.0366173
peak_1892	C2_02220C_A	Promoter (<=1kb)	NA	3635774	-0.592897	6.10144	0.036763
peak_31	C1_00190C_A	Promoter (<=1kb)	NA	3639337	-0.379546	8.09866	0.0368258
peak_4298	C4_05250W_A	Promoter (<=1kb)	NA	3646158	-0.49568	6.75249	0.0368484
peak_156	C1_01140C_A	Exon (C1_01140C_A/C1_01140C_A, exon 1 of 1)	NA	3640202	1.06445	4.90692	0.0371136
peak_3445	C3_05710W_A	Promoter (<=1kb)	RCT1	3641727	-0.371416	9.54212	0.0371136
peak_6649	CR_04480C_A	Promoter (<=1kb)	LAP3	3641012	0.512878	6.40226	0.0371527
peak_1874	C2_02030W_A	Promoter (<=1kb)	ARO3	3635770	0.391114	8.03075	0.0371527
peak_7197	CR_08670C_A	Promoter (<=1kb)	NA	3642126	-0.415231	7.40802	0.0371527
peak_505	C1_04320W_A	Promoter (<=1kb)	GPM2	3644713	0.402981	7.43973	0.0376319
peak_5895	C7_01810W_A	Promoter (<=1kb)	RVB2	3637055	0.43037	7.81222	0.0376994
peak_4685	C5_01510W_A	Exon (C5_01510W_A/C5_01510W_A, exon 1 of 1)	SMD3	3647060	0.965649	5.07385	0.0377234
peak_7052	CR_08000C_A	Promoter (<=1kb)	NA	3644150	0.503355	6.557	0.0377234
peak_752	C1_06820W_A	Promoter (<=1kb)	NA	3639493	1.06613	8.24786	0.0377608
peak_3610	C3_07000W_A	Exon (C3_07000W_A/C3_07000W_A, exon 1 of 1)	RPD31	3638520	-0.697021	5.57837	0.0377677
peak_3843	C4_00880W_A	Exon (C4_00880W_A/C4_00880W_A, exon 1 of 1)	NA	3635681	-0.726399	5.70651	0.0378825
peak_3875	C4_01120C_A	Exon (C4_01110W_A/C4_01110W_A, exon 1 of 1)	NA	3635683	-0.521512	6.61091	0.0379662
peak_3561	C3_06600C_A	Promoter (<=1kb)	NA	3642280	0.745964	5.47105	0.0381285
peak_7312	CR_09160C_A	Promoter (<=1kb)	ERG13	3641881	0.483951	6.94984	0.0381285
peak_992	C1_08980C_A	Promoter (1-2kb)	ZWF1	3634913	0.391927	8.07577	0.0381285
peak_2502	C2_08150W_A	Promoter (<=1kb)	NA	3642328	-0.356665	8.91862	0.0381285
peak_5340	C6_02150C_A	Promoter (<=1kb)	NA	3645888	-0.41612	7.90849	0.0381285
peak_5670	C6_04610C_A	Promoter (<=1kb)	NAG3	3645969	-0.581754	6.31337	0.0381285
peak_4934	C5_04030W_A	Downstream (2-3kb)	NA	3647737	-0.650877	5.79159	0.0381285
peak_644	C1_05760C_A	Promoter (<=1kb)	PGA26	3639890	-0.805912	5.55805	0.0381285
peak_5247	C6_01290C_A	Promoter (<=1kb)	QDR3	3644023	0.470892	6.66406	0.0381385
peak_3402	C3_05450C_A	Downstream (1-2kb)	NA	3643669	-0.586792	7.81327	0.038327
peak_1717	C2_00540W_A	Promoter (<=1kb)	NA	3638865	0.467535	7.4944	0.0383388
peak_5189	C6_00800C_A	Downstream (2-3kb)	NA	3647069	0.454229	7.09911	0.0383408
peak_1454	C1_13250W_A	Promoter (<=1kb)	NA	3636143	0.386541	8.37948	0.038385
peak_2043	C2_03520C_A	Exon (C2_03520C_A/C2_03520C_A, exon 1 of 1)	ADAEC	3637342	0.59543	6.5665	0.0385375
peak_5262	C6_01450C_A	Promoter (<=1kb)	NA	3641624	-0.40578	7.87137	0.0385375
peak_5553	C6_04140C_A	Promoter (<=1kb)	NA	3647970	-0.492669	6.83919	0.0385375
peak_1339	C1_12010C_A	5' UTR	KIP4	3642032	-0.681524	5.59261	0.0386227
peak_3049	C3_02150C_A	Promoter (<=1kb)	ERG6	3636655	-0.397709	8.21903	0.0386275
peak_1319	C1_11850W_A	Exon (C1_11850W_A/C1_11850W_A, exon 1 of 1)	NA	3642010	1.1193	5.24491	0.0386887
peak_4910	C5_03880C_A	5' UTR	NA	3647222	-0.957207	4.97481	0.0387048
peak_6380	CR_02020C_A	Promoter (1-2kb)	OPT1	3640150	-1.12444	4.82005	0.0387048
peak_5336	C6_02100W_A	Promoter (<=1kb)	NA	3647554	1.2349	7.84921	0.0387646
peak_4990	C5_04640C_A	Promoter (<=1kb)	NA	3636397	0.459011	6.93172	0.0388071
peak_5242	C6_01180C_A	Exon (C6_01180C_A/C6_01180C_A, exon 1 of 1)	EBP1	3644060	1.47203	5.5514	0.0391249
peak_6766	CR_05620C_A	Downstream (<1kb)	MTG2	3646693	-0.55604	6.11106	0.0391909
peak_6931	CR_07060C_A	Downstream (1-2kb)	CRZ2	3645725	0.714737	6.62461	0.0394407
peak_1373	C1_12450C_A	5' UTR	IRA2	3642011	-0.401803	7.34229	0.0394407
peak_5482	C6_03660C_A	Promoter (1-2kb)	CDC50	3640302	0.750796	5.86206	0.0394641
peak_4797	C5_02700W_A	Promoter (<=1kb)	CTA7	3637776	0.480614	7.33534	0.039593
peak_3861	C4_01020C_A	Promoter (<=1kb)	NA	3635606	0.360219	8.26343	0.039593
peak_6604	CR_03890W_A	Promoter (<=1kb)	WOR3	3641009	-0.527914	7.20328	0.039593
peak_6314	CR_01280C_A	Promoter (<=1kb)	NA	3640400	-0.481467	7.48535	0.0397392
peak_3244	C3_04170W_A	Promoter (<=1kb)	NA	3635182	0.648505	5.71471	0.0399912
peak_1834	C2_01750C_A	Exon (C2_01750C_A/C2_01750C_A, exon 1 of 1)	NA	3635734	-0.555844	6.14057	0.0400567
peak_1078	C1_09700W_A	Promoter (<=1kb)	NA	3634876	0.921404	5.35664	0.0401054
peak_6968	CR_07450C_A	Promoter (<=1kb)	MNL1	3646050	0.99506	6.91053	0.0402906
peak_3088	C3_02610C_A	Promoter (<=1kb)	GLX3	3638325	1.24629	6.96629	0.0404775
peak_689	C1_06290C_A	Downstream (2-3kb)	NA	NA	-0.904616	5.06773	0.0404775
peak_2127	C2_04410W_A	Promoter (<=1kb)	NA	3645455	0.862031	5.40555	0.040525
peak_870	C1_07870C_A	Promoter (<=1kb)	SMI1	3640741	-0.43687	7.17155	0.040525
peak_288	C1_02270C_A	Promoter (<=1kb)	NA	3644566	-0.477673	6.66398	0.0405836
peak_5238	C6_01140C_A	Promoter (<=1kb)	ARC18	3644056	-0.57363	6.25387	0.0407222
peak_1015	C1_09150W_A	Promoter (<=1kb)	AOX2	3634945	0.708509	7.40869	0.0408048
peak_2675	C2_09820W_A	Promoter (<=1kb)	NA	3643801	-0.552524	6.11849	0.0408342
peak_6622	CR_04060C_A	Promoter (<=1kb)	DAP1	3641021	0.395777	7.49149	0.0408372
peak_4130	C4_03630C_A	Downstream (<1kb)	tG(GCC)2	30515258	-0.549943	6.36914	0.0408681
peak_705	C1_06320W_A	Promoter (1-2kb)	NA	3648118	-0.949115	5.22548	0.0409552
peak_5303	C6_01780C_A	Promoter (<=1kb)	NA	3641636	0.347085	8.64367	0.0411709
peak_3371	C3_05190C_A	Promoter (<=1kb)	MCA1	3635233	-0.423126	7.1451	0.0412494
peak_3569	C3_06700C_A	Promoter (<=1kb)	NA	3642247	0.39117	7.47887	0.0413267
peak_5292	C6_01670W_A	Promoter (<=1kb)	MAE1	3641615	-0.558958	6.12863	0.0413267
peak_4822	C5_03020W_A	Promoter (1-2kb)	CCC2	3637821	0.8695	5.33002	0.0415687
peak_1224	C1_11040W_A	Exon (C1_11040W_A/C1_11040W_A, exon 1 of 1)	RPL29	30515048	-0.795282	5.34124	0.0415687
peak_3698	C3_07590W_A	Promoter (<=1kb)	NA	3638496	0.523751	6.44256	0.041599
peak_4810	C5_02850W_A	Downstream (<1kb)	NA	30515305	1.07848	4.86198	0.0417376
peak_1103	C1_10010C_A	Promoter (<=1kb)	SWE1	3634866	0.461246	6.66873	0.0418588
peak_3272	C3_04510W_A	Exon (C3_04520C_A/C3_04520C_A, exon 1 of 1)	NA	3635258	-0.574387	6.1986	0.0418588
peak_4585	C5_00550C_A	Downstream (1-2kb)	NA	3641535	-0.827272	5.31189	0.0421253
peak_331	C1_02720W_A	Distal Intergenic	NA	3636825	-0.918243	5.21505	0.0421332
peak_6587	CR_03790C_A	Promoter (<=1kb)	KRE1	3643180	-0.358143	8.92592	0.0422361
peak_4177	C4_04170C_A	5' UTR	AXL2	3641184	-0.66183	5.8834	0.0422361
peak_5016	C5_04820W_A	Promoter (<=1kb)	NA	NA	-0.361411	8.68322	0.0423532
peak_1671	C2_00110W_A	Exon (C2_00120C_A/C2_00120C_A, exon 1 of 1)	NA	3647921	-0.58742	5.98802	0.0423532
peak_3657	C3_07360W_A	Promoter (<=1kb)	DLD2	3638475	0.469669	6.91121	0.0423916
peak_1229	C1_11080W_A	Promoter (<=1kb)	NA	3644416	0.326882	9.73555	0.0425058
peak_4792	C5_02650C_A	Promoter (<=1kb)	IFH1	3637770	-0.400528	7.91692	0.0425058
peak_4584	C5_00550C_A	Distal Intergenic	NA	3641535	-0.796274	5.34246	0.0425058
peak_1957	C2_02970C_A	Promoter (<=1kb)	ALD5	3643026	-0.335883	9.41354	0.0425638
peak_818	C1_07320W_A	Promoter (<=1kb)	NA	30515023	-0.37903	8.35095	0.0425638
peak_1068	C1_09630W_A	Promoter (<=1kb)	IDH1	3634893	0.479044	6.64876	0.0425647
peak_2185	C2_05010W_A	Promoter (<=1kb)	tT(AGU)4	30515116	-0.396474	7.87756	0.0425647
peak_1062	C1_09550W_A	Downstream (<1kb)	NA	3634886	-0.474834	6.92164	0.0425656
peak_4360	C4_05920C_A	Promoter (<=1kb)	PGA49	3646525	0.659715	5.60105	0.0426793
peak_1155	C1_10350C_A	Promoter (1-2kb)	NA	3634835	0.622289	5.91854	0.0427443
peak_50	C1_00360W_A	5' UTR	CDC13	3639293	-0.66242	5.61248	0.0427511
peak_2853	C3_00360W_A	Promoter (<=1kb)	NA	3640542	0.376621	8.83202	0.0429485
peak_1458	C1_13260W_A	Promoter (<=1kb)	NA	30515074	0.524764	6.25436	0.0429934
peak_5290	C6_01660C_A	Promoter (<=1kb)	NA	NA	-0.857785	5.33239	0.0429934
peak_686	C1_06270W_A	Promoter (<=1kb)	NA	3647523	-0.607908	5.9091	0.0430126
peak_3616	C3_07020W_A	Exon (C3_07020W_A/C3_07020W_A, exon 1 of 1)	SSN6	3638518	-0.620348	5.87793	0.0430126
peak_4903	C5_03780C_A	Promoter (<=1kb)	NA	3647232	-0.868757	5.57416	0.0430126
peak_3368	C3_05180W_A	Promoter (<=1kb)	RHB1	3635232	-0.535602	6.9022	0.0431091
peak_2094	C2_04050C_A	Promoter (<=1kb)	DCK1	3637383	0.496835	7.00406	0.0431582
peak_5185	C6_00790C_A	Promoter (<=1kb)	CTR1	3647077	0.453257	7.515	0.0431582
peak_4554	C5_00350C_A	5' UTR	NA	3641554	-0.39851	7.49971	0.0431582
peak_7375	CR_09620C_A	Promoter (<=1kb)	NA	6335435	0.492763	6.57418	0.0433134
peak_5477	C6_03620C_A	Promoter (<=1kb)	NA	3640297	0.551947	6.4082	0.0433667
peak_2479	C2_07920W_A	Promoter (<=1kb)	NA	3642294	0.781794	7.14978	0.0435817
peak_2699	C2_09990C_A	Promoter (<=1kb)	YOR1	3643964	0.373412	7.76844	0.0436436
peak_5008	C5_04810W_A	Exon (C5_04810W_A/C5_04810W_A, exon 1 of 1)	PFK1	3636448	0.834645	6.84789	0.043934
peak_4866	C5_03420W_A	Promoter (<=1kb)	tE(UUC)5	30515309	-0.380955	7.75049	0.043934
peak_5812	C7_00980W_A	Promoter (<=1kb)	PHM5	3637951	-1.32369	7.62574	0.0439491
peak_663	C1_05940W_A	Promoter (<=1kb)	PHO87	3639861	-0.372435	8.10897	0.0441809
peak_1297	C1_11690W_A	Exon (C1_11690W_A/C1_11690W_A, exon 1 of 1)	NA	3645322	0.74283	5.62641	0.0442663
peak_3356	C3_05170W_A	Distal Intergenic	WOR2	3635230	-0.834388	5.18687	0.0442663
peak_1604	C1_14310W_A	Exon (C1_14310W_A/C1_14310W_A, exon 1 of 1)	NA	3643315	0.642151	5.96649	0.0443873
peak_6280	CR_00910W_A	Promoter (1-2kb)	NA	30515371	-0.840087	5.12959	0.0444312
peak_700	C1_06300W_A	Promoter (1-2kb)	NA	30515004	-0.541817	6.50559	0.0445217
peak_1196	C1_10740C_A	Exon (C1_10740C_A/C1_10740C_A, exon 1 of 1)	ASR1	3644402	-0.567681	6.06789	0.0445217
peak_3831	C4_00780C_A	Promoter (1-2kb)	NA	3645759	-0.402708	7.23233	0.0447751
peak_4819	C5_02970W_A	Promoter (<=1kb)	DAP2	3637815	-0.563733	6.11351	0.044778
peak_2966	C3_01260C_A	Exon (C3_01260C_A/C3_01260C_A, exon 1 of 1)	NA	3636625	-0.57473	6.141	0.0448822
peak_3689	C3_07560W_A	Distal Intergenic	TCC1	3638524	-0.897912	5.14582	0.0448822
peak_1890	C2_02210C_A	Promoter (<=1kb)	TLG2	3635773	-0.674496	5.51821	0.0449478
peak_664	C1_05940W_A	Promoter (<=1kb)	PHO87	3639861	-0.69349	5.74148	0.0449483
peak_6075	C7_03720C_A	Promoter (<=1kb)	HIS7	3647868	0.611644	5.96021	0.0449734
peak_6925	CR_07060C_A	Promoter (1-2kb)	CRZ2	3645725	0.40493	8.12087	0.0452072
peak_1576	C1_14130W_A	Promoter (<=1kb)	FTR1	3643318	-0.434582	7.10717	0.0453544
peak_4342	C4_05770C_A	Promoter (<=1kb)	CFL1	3641810	-0.469817	6.53458	0.0453544
peak_5363	C6_02350C_A	Promoter (<=1kb)	NA	3645881	-0.608842	6.11541	0.0453544
peak_5907	C7_01930C_A	Exon (C7_01930C_A/C7_01930C_A, exon 1 of 1)	NA	3637027	0.607446	5.90812	0.0454012
peak_7117	CR_08390W_A	Promoter (<=1kb)	tI(AAU)5	30515440	-0.336891	8.84643	0.0454012
peak_1801	C2_01360C_A	Promoter (<=1kb)	DCW1	3638842	-0.363622	9.11982	0.0454012
peak_2581	C2_09000C_A	5' UTR	NA	3645782	-0.481536	7.1023	0.0454012
peak_5800	C7_00920C_A	Promoter (<=1kb)	NA	3637957	0.769416	5.8113	0.0454116
peak_1209	C1_10850W_A	Promoter (<=1kb)	NA	3644451	0.71854	5.55841	0.0454123
peak_5519	C6_03850C_A	Promoter (<=1kb)	IHD1	3640291	-0.384114	7.88964	0.0455014
peak_1982	C2_03110W_A	Exon (C2_03100W_A/C2_03100W_A, exon 2 of 2)	NA	3642995	-0.619628	5.81274	0.0455014
peak_1013	C1_09140C_A	5' UTR	SSU81	3634944	0.452419	6.77649	0.0455087
peak_4240	C4_04670C_A	Promoter (<=1kb)	NA	3641140	-0.359848	7.9009	0.0457445
peak_4559	C5_00390C_A	5' UTR	NA	3641552	-0.399529	7.13931	0.0457445
peak_5783	C7_00780W_A	Promoter (<=1kb)	NA	3637945	1.58045	6.63222	0.0457784
peak_5009	C5_04810W_A	Exon (C5_04810W_A/C5_04810W_A, exon 1 of 1)	PFK1	3636448	0.961312	8.363	0.0461563
peak_72	C1_00500C_A	Promoter (<=1kb)	GLO1	3639312	0.468627	7.28247	0.0461563
peak_3661	C3_07380W_A	Promoter (<=1kb)	NA	3638473	0.522469	6.30435	0.0463429
peak_4010	C4_02520C_A	Promoter (<=1kb)	NA	3637863	0.563494	6.22582	0.0467545
peak_5952	C7_02220C_A	Promoter (<=1kb)	NA	3636989	-0.429332	7.49454	0.0467545
peak_1441	C1_13150W_A	Promoter (<=1kb)	NA	NA	0.340284	9.8997	0.0469753
peak_3860	C4_01010C_A	Promoter (1-2kb)	DAG7	3635607	-0.400252	7.14429	0.0469753
peak_6862	CR_06440C_A	Distal Intergenic	BCR1	3645280	-0.43809	6.81141	0.0469753
peak_899	C1_08040W_A	Promoter (<=1kb)	NA	30515028	0.542496	6.06255	0.0470356
peak_6775	CR_05710C_A	Promoter (<=1kb)	NA	3646700	0.420534	6.91049	0.0474854
peak_5136	C6_00320C_A	5' UTR	DNA2	3646072	0.57711	6.21537	0.0475087
peak_1851	C2_01780W_A	Exon (C2_01780W_A/C2_01780W_A, exon 1 of 1)	MSB2	3635830	-0.50355	6.54076	0.0475087
peak_4461	C4_06890W_A	Promoter (<=1kb)	ARR3	3642910	1.9284	7.50472	0.0475136
peak_7037	CR_07910C_A	Promoter (<=1kb)	NA	3644142	0.515172	6.51485	0.0475138
peak_6047	C7_03310W_A	Promoter (<=1kb)	NA	3646726	-0.368625	8.63068	0.0476127
peak_1607	C1_14330W_A	Exon (C1_14330W_A/C1_14330W_A, exon 1 of 1)	NA	3643278	-0.422532	7.15844	0.0476127
peak_4558	C5_00380W_A	Promoter (<=1kb)	NA	3641553	0.434275	6.80404	0.0476689
peak_5559	C6_04190C_A	Exon (C6_04190C_A/C6_04190C_A, exon 1 of 1)	NA	3646282	-0.711756	5.74427	0.0476689
peak_3334	C3_04950W_A	Exon (C3_04950W_A/C3_04950W_A, exon 1 of 1)	ARF2	3635271	-0.912384	5.05266	0.0476689
peak_3249	C3_04240C_A	Downstream (1-2kb)	NA	NA	-0.543761	6.1401	0.047723
peak_6422	CR_02350C_A	Promoter (<=1kb)	GEF2	3644935	0.361839	8.0212	0.0480811
peak_918	C1_08270C_A	Promoter (1-2kb)	MED15	3640761	-0.802789	5.2496	0.0484499
peak_924	C1_08320W_A	Promoter (<=1kb)	TKL1	3640767	0.654469	5.80808	0.0484832
peak_6482	CR_02750C_A	Promoter (<=1kb)	PGA34	3642579	-0.438879	6.98714	0.0485162
peak_15	C1_00130C_A	Promoter (<=1kb)	VPS53	3639319	-0.703315	5.65129	0.0485162
peak_5997	C7_02810W_A	Downstream (2-3kb)	PRX1	3641357	-0.415214	7.68716	0.0487237
peak_2701	C2_10020C_A	Promoter (<=1kb)	NA	3643952	-0.569276	6.26759	0.048738
peak_4433	C4_06670W_A	Promoter (<=1kb)	NA	3642951	1.02932	4.75678	0.0488643
peak_7294	CR_09050C_A	Exon (CR_09050C_A/CR_09050C_A, exon 1 of 1)	NA	3648197	-0.667862	5.60285	0.0489206
peak_4084	C4_03280W_A	Promoter (<=1kb)	MSN5	3637889	0.333143	8.60918	0.0489528
peak_4640	C5_01090C_A	Promoter (<=1kb)	NA	3642625	-0.601799	5.75615	0.0489528
peak_4692	C5_01570C_A	5' UTR	SPO1	3647039	-0.999247	5.39564	0.049071
peak_3912	C4_01400W_A	Promoter (<=1kb)	UEC1	3635628	0.687461	5.6026	0.0491013
peak_113	C1_00840C_A	Promoter (1-2kb)	NRM1	3639343	-0.740878	7.17962	0.0492532
peak_5892	C7_01790C_A	Promoter (<=1kb)	RPL5	3637057	1.0408	8.77581	0.0492733
peak_1545	C1_13930W_A	Distal Intergenic	SSK1	3636184	0.333841	9.06105	0.0492733
peak_4841	C5_03150W_A	Promoter (<=1kb)	NA	3637799	-0.484655	6.53873	0.0492733
peak_6404	CR_02210W_A	Promoter (1-2kb)	NA	3644943	-0.493351	6.44048	0.0492733
peak_7041	CR_07950W_A	Exon (CR_07960C_A/CR_07960C_A, exon 1 of 1)	IMP4	3644138	-0.746649	5.6023	0.0492835
peak_4806	C5_02830W_A	Exon (C5_02830W_A/C5_02830W_A, exon 1 of 1)	NA	3637809	0.458947	6.83862	0.0493274
peak_6391	CR_02130W_A	Promoter (<=1kb)	ECM4	3640144	0.419615	7.15907	0.049446
peak_1531	C1_13880C_A	Exon (C1_13880C_A/C1_13880C_A, exon 1 of 1)	NA	3636133	-0.632312	5.76268	0.049446
peak_5850	C7_01440W_A	Promoter (<=1kb)	NA	3636960	1.3645	6.51366	0.0495475
peak_3577	C3_06780C_A	Exon (C3_06780C_A/C3_06780C_A, exon 1 of 1)	SLF1	3638500	-0.703345	5.72349	0.0495475
peak_4069	C4_03010W_A	Promoter (<=1kb)	tT(UGU)1	30515252	-0.390426	7.37366	0.0497502
peak_3426	C3_05580C_A	Promoter (<=1kb)	GAP2	3643662	-0.510817	6.67466	0.049762
peak_984	C1_08950W_A	Promoter (<=1kb)	PFK26	3634912	0.359736	8.035	0.0498147
peak_1008	C1_09130W_A	Distal Intergenic	MNN47	3634943	-0.597741	6.14379	0.04985
peak_3519	C3_06320W_A	Exon (C3_06320W_A/C3_06320W_A, exon 1 of 1)	ALS7	3642234	-0.8112	5.2636	0.0499096
peak_1656	C2_00030W_A	Exon (C2_00030W_A/C2_00030W_A, exon 1 of 1)	RRN3	3647925	-0.475671	6.51662	0.049996
peak_4336	C4_05720W_A	5' UTR	NA	NA	-0.486848	6.55725	0.049996
peak_5252	C6_01370W_A	Promoter (<=1kb)	NA	3641607	0.626248	5.73207	0.050174
peak_7498	CR_10580W_A	Promoter (<=1kb)	PRO1	3639000	0.412873	7.24872	0.050174
peak_4621	C5_00890C_A	Promoter (<=1kb)	GIT2	3642633	-0.634409	5.69759	0.0504265
peak_5225	C6_00960W_A	Promoter (<=1kb)	CAN1	3644035	-0.380559	8.33247	0.0508264
peak_1738	C2_00780W_A	Promoter (<=1kb)	POT1-2	3638908	0.483495	6.38666	0.0509761
peak_5199	C6_00820W_A	Exon (C6_00820W_A/C6_00820W_A, exon 1 of 1)	SUN41	3647067	-0.736157	5.43005	0.0511867
peak_556	C1_04840C_A	Exon (C1_04840C_A/C1_04840C_A, exon 1 of 1)	NA	3644785	-0.95497	4.9106	0.0511867
peak_4993	C5_04680W_A	Promoter (<=1kb)	PSD2	3636515	0.571099	6.4237	0.0512384
peak_3255	C3_04330C_A	Promoter (<=1kb)	NA	3635272	0.423693	7.12518	0.0512384
peak_560	C1_04900W_A	Promoter (<=1kb)	MNN15	3644794	-0.47755	6.48674	0.0512419
peak_1202	C1_10800C_A	Exon (C1_10790W_A/C1_10790W_A, exon 1 of 1)	ALP1	3644437	0.689011	6.60865	0.0512882
peak_3988	C4_02370C_A	Downstream (1-2kb)	PGA59	3637881	-0.693103	5.46753	0.0512939
peak_6498	CR_02860W_A	Promoter (1-2kb)	RHO1	3642564	-0.42344	6.77842	0.0514189
peak_1437	C1_13110C_A	Promoter (<=1kb)	CHS3	3636199	-0.468364	6.54819	0.0514189
peak_674	C1_06090C_A	Promoter (<=1kb)	NA	3639822	0.355006	7.80715	0.052038
peak_1546	C1_13940W_A	Distal Intergenic	SIM1	3636185	0.656548	7.02666	0.052077
peak_2783	C2_10690W_A	Promoter (<=1kb)	TPS3	3641205	0.659833	7.97064	0.0523673
peak_2204	C2_05230C_A	Promoter (<=1kb)	RPF2	3643467	-0.406659	8.13467	0.0523673
peak_7241	CR_08880C_A	Exon (CR_08880C_A/CR_08880C_A, exon 1 of 1)	NA	3641878	-0.390362	7.28405	0.0524173
peak_3032	C3_01920C_A	Promoter (<=1kb)	tY(GUA)2	30515183	-0.361789	7.77309	0.0525043
peak_5307	C6_01860C_A	Exon (C6_01860C_A/C6_01860C_A, exon 2 of 2)	HCH1	3641626	0.697081	5.79938	0.0525514
peak_1104	C1_10010C_A	Promoter (<=1kb)	SWE1	3634866	0.360236	7.6402	0.0526604
peak_1066	C1_09610W_A	Promoter (<=1kb)	NA	3634891	0.364894	7.86896	0.0527587
peak_1494	C1_13600W_A	Promoter (1-2kb)	NA	3636210	-0.60464	6.1544	0.0527877
peak_7396	CR_09800C_A	Promoter (<=1kb)	NA	3638984	0.570527	5.82919	0.0528428
peak_2573	C2_08940C_A	Promoter (<=1kb)	VPS28	3645794	0.605639	5.93318	0.0528593
peak_5818	C7_01070C_A	Promoter (<=1kb)	NA	3637949	0.406666	6.9957	0.0528593
peak_5096	C6_00090W_A	5' UTR	NA	3647898	-0.40388	7.09118	0.0528593
peak_5019	C5_04830W_A	Exon (C5_04830W_A/C5_04830W_A, exon 1 of 1)	SFL2	3636434	-0.632457	5.69729	0.0528593
peak_3685	C3_07550C_A	Exon (C3_07550C_A/C3_07550C_A, exon 1 of 1)	NA	3638525	-0.523729	6.22595	0.0531387
peak_114	C1_00840C_A	Promoter (1-2kb)	NRM1	3639343	-1.1905	4.64667	0.053228
peak_3409	C3_05460W_A	Promoter (<=1kb)	NA	3643670	-0.334324	8.81225	0.0535582
peak_1861	C2_01940C_A	Exon (C2_01940C_A/C2_01940C_A, exon 1 of 1)	NA	NA	0.302619	10.7744	0.0536418
peak_2781	C2_10670W_A	Exon (C2_10670W_A/C2_10670W_A, exon 1 of 1)	NA	3641251	-0.394463	7.41499	0.0536418
peak_6341	CR_01580C_A	Promoter (<=1kb)	DOT6	3640078	0.422311	7.08437	0.0538393
peak_5551	C6_04130C_A	Downstream (<1kb)	ALS4	3647972	-0.708815	5.41722	0.0538393
peak_6182	CR_00090C_A	Promoter (<=1kb)	NA	3639734	0.632749	6.2791	0.0540091
peak_1120	C1_10150W_A	Distal Intergenic	WOR1	3634781	-0.97619	4.9664	0.0541041
peak_6729	CR_05340C_A	Promoter (<=1kb)	IFE2	3648027	0.346612	8.59167	0.0541599
peak_4791	C5_02650C_A	Promoter (<=1kb)	IFH1	3637770	-0.42021	7.16177	0.0541599
peak_4511	C5_00090C_A	Promoter (<=1kb)	NA	3647885	-0.569978	5.84309	0.054162
peak_1072	C1_09660W_A	Promoter (<=1kb)	DOA1	3634871	0.628438	6.20672	0.0542405
peak_634	C1_05550C_A	Promoter (<=1kb)	NA	30514994	0.392922	7.19779	0.0545982
peak_6175	CR_00060C_A	Exon (CR_00060C_A/CR_00060C_A, exon 1 of 1)	NA	3639673	-0.494067	6.41226	0.0546551
peak_7088	CR_08250C_A	Exon (CR_08250C_A/CR_08250C_A, exon 1 of 1)	HSP104	3642097	-0.582194	5.83683	0.0549197
peak_7050	CR_08000C_A	Exon (CR_08000C_A/CR_08000C_A, exon 1 of 1)	NA	3644150	-0.405852	7.31901	0.0550304
peak_1346	C1_12070C_A	Promoter (<=1kb)	NA	3642025	0.93965	5.02323	0.0550978
peak_2041	C2_03520C_A	Downstream (<1kb)	ADAEC	3637342	0.298511	11.2994	0.0550978
peak_200	C1_01520C_A	Promoter (<=1kb)	SOD2	3640231	0.541419	6.13983	0.0551632
peak_2169	C2_04880C_A	Promoter (<=1kb)	ARH2	3643411	-0.380181	7.96295	0.0551632
peak_4955	C5_04140W_A	Promoter (<=1kb)	NA	3636524	-0.426178	7.83683	0.0551632
peak_7515	CR_10700W_A	Exon (CR_10700W_A/CR_10700W_A, exon 1 of 1)	RFC4	3638994	-0.526909	6.14598	0.0551632
peak_1178	C1_10580C_A	Promoter (<=1kb)	NA	3647679	-0.819703	5.98458	0.0551632
peak_3582	C3_06830C_A	Promoter (<=1kb)	NA	3638543	-0.353138	8.77299	0.0551911
peak_176	C1_01380C_A	Promoter (<=1kb)	TRM2	3640235	-0.389589	7.09129	0.0552456
peak_106	C1_00790W_A	Distal Intergenic	NA	3639348	-0.73038	5.40289	0.0553733
peak_7522	CR_10790W_A	5' UTR	MAL2	3638946	-0.394734	7.1487	0.0555261
peak_955	C1_08540C_A	Promoter (<=1kb)	NA	3646497	0.379884	7.28494	0.0556803
peak_3251	C3_04250W_A	Promoter (<=1kb)	WSC1	3635138	-0.414504	7.95157	0.0556803
peak_223	C1_01720C_A	Promoter (<=1kb)	NA	30514964	-0.848539	5.02439	0.0556866
peak_7172	CR_08610W_A	Exon (CR_08610W_A/CR_08610W_A, exon 1 of 1)	NA	3642109	-0.487892	6.30388	0.0560099
peak_7193	CR_08670C_A	Exon (CR_08660W_A/CR_08660W_A, exon 1 of 1)	NA	3642126	-0.518499	6.12165	0.0561331
peak_1197	C1_10740C_A	Promoter (<=1kb)	ASR1	3644402	0.562062	6.02751	0.0561461
peak_1296	C1_11690W_A	Exon (C1_11690W_A/C1_11690W_A, exon 1 of 1)	NA	3645322	0.751903	5.4079	0.056214
peak_1674	C2_00130W_A	5' UTR	NA	NA	0.324358	9.404	0.0562423
peak_7236	CR_08860W_A	Exon (CR_08860W_A/CR_08860W_A, exon 1 of 1)	PDK2	3641876	-0.381466	7.42147	0.0562818
peak_7344	CR_09410W_A	Distal Intergenic	NA	3641933	-0.509203	6.88148	0.0562818
peak_7060	CR_08070W_A	Exon (CR_08070W_A/CR_08070W_A, exon 1 of 1)	PTP1	3642093	-0.53245	6.36856	0.0566051
peak_6385	CR_02080W_A	Promoter (<=1kb)	tL(AAG)1	30515379	0.338753	8.1119	0.0568752
peak_6414	CR_02280W_A	Promoter (<=1kb)	PGA23	3644941	-0.350104	7.74694	0.0569445
peak_4804	C5_02790C_A	Promoter (<=1kb)	GAP1	3637806	0.321364	8.65052	0.0570239
peak_4149	C4_03890W_A	Exon (C4_03890W_A/C4_03890W_A, exon 1 of 1)	PTP2	3647858	1.14621	4.69168	0.0571718
peak_7414	CR_09920W_A	Promoter (<=1kb)	NA	3639028	-0.387274	7.9874	0.057814
peak_3731	C3_07790W_A	Exon (C3_07790W_A/C3_07790W_A, exon 1 of 1)	STD1	3647459	-0.539232	6.15265	0.057814
peak_4202	C4_04410C_A	Promoter (<=1kb)	LYS4	3641180	0.35215	7.7289	0.0579079
peak_5954	C7_02270W_A	Promoter (<=1kb)	LDG3	3637001	0.425004	7.15373	0.0580351
peak_1968	C2_03030W_A	5' UTR	LIG4	3642986	0.356782	7.8712	0.0585103
peak_4549	C5_00320W_A	Exon (C5_00330C_A/C5_00330C_A, exon 1 of 1)	NA	30515291	-0.521905	6.04513	0.0588964
peak_2117	C2_04280W_A	Promoter (<=1kb)	NA	3637326	-0.498526	6.28292	0.0588971
peak_7033	CR_07900C_A	Exon (CR_07890W_A/CR_07890W_A, exon 1 of 1)	NA	NA	-0.490882	6.3569	0.0589335
peak_1151	C1_10350C_A	5' UTR	NA	3634835	0.403485	7.48102	0.0589746
peak_3676	C3_07500W_A	Exon (C3_07500W_A/C3_07500W_A, exon 2 of 2)	VAN1	3638527	-0.483895	6.42223	0.0589746
peak_5567	C6_04240W_A	Promoter (<=1kb)	NA	3646276	-0.610837	5.58148	0.0591587
peak_6443	CR_02570C_A	Promoter (<=1kb)	NA	3647685	0.409402	6.89146	0.0591746
peak_6292	CR_00980C_A	Promoter (<=1kb)	CAB3	3640426	0.542198	6.88272	0.0592557
peak_6770	CR_05650W_A	Exon (CR_05650W_A/CR_05650W_A, exon 1 of 1)	BRF1	3646689	-0.622023	5.74501	0.0593252
peak_4994	C5_04680W_A	Promoter (<=1kb)	PSD2	3636515	0.47863	6.35538	0.0594947
peak_262	C1_02110C_A	Promoter (<=1kb)	HGT2	3644579	-0.451782	7.05936	0.0594947
peak_3792	C4_00380W_A	Exon (C4_00380W_A/C4_00380W_A, exon 1 of 1)	NA	3645015	-0.480761	6.4284	0.0594947
peak_7258	CR_08940W_A	Exon (CR_08940W_A/CR_08940W_A, exon 1 of 1)	NA	3641914	-0.375946	8.0137	0.0598028
peak_3043	C3_02040C_A	Promoter (<=1kb)	NA	3636579	-0.355427	7.93955	0.0600697
peak_1563	C1_14080W_A	5' UTR	NA	3643345	-0.390345	7.40544	0.060224
peak_7032	CR_07890W_A	Exon (CR_07890W_A/CR_07890W_A, exon 1 of 1)	EFG1	3644145	-0.496924	6.23698	0.0603598
peak_2238	C2_05570C_A	Promoter (<=1kb)	NA	3645562	-0.355977	7.66899	0.0605701
peak_5721	C7_00280W_A	Promoter (<=1kb)	HGT12	3638048	-0.487316	6.26556	0.0607373
peak_4847	C5_03240W_A	Promoter (<=1kb)	BUB3	3646362	0.351691	7.78942	0.060817
peak_2226	C2_05460W_A	Promoter (<=1kb)	CDC19	3643438	0.320366	8.91864	0.060817
peak_4915	C5_03920C_A	Promoter (<=1kb)	NA	3647448	-0.365365	8.35563	0.060817
peak_3096	C3_02710W_A	Promoter (<=1kb)	NA	30515190	-0.42242	6.84115	0.060817
peak_3732	C3_07800C_A	Promoter (<=1kb)	NA	3647461	-0.564274	5.77112	0.060817
peak_4178	C4_04170C_A	5' UTR	AXL2	3641184	-1.00903	4.64112	0.060817
peak_2373	C2_06700W_A	5' UTR	AMO2	3648021	-0.558928	6.12183	0.0608769
peak_4079	C4_03180W_A	Promoter (<=1kb)	NCP1	3637839	0.619133	5.83577	0.0609005
peak_6805	CR_05990C_A	Distal Intergenic	SFL1	3642498	-0.338464	8.60501	0.0609005
peak_3505	C3_06200C_A	Downstream (<1kb)	MMS21	3642265	0.679451	5.63942	0.0611188
peak_459	C1_03870C_A	Promoter (<=1kb)	NA	3646407	-0.508366	6.39895	0.0611188
peak_3382	C3_05250C_A	Promoter (1-2kb)	NA	3635199	-0.384392	7.09504	0.0611735
peak_3596	C3_06860C_A	Promoter (<=1kb)	NA	3638541	0.299614	10.0593	0.06136
peak_5723	C7_00290C_A	5' UTR	HGT13	3638047	-0.432918	6.57549	0.0615782
peak_6008	C7_02940C_A	Exon (C7_02940C_A/C7_02940C_A, exon 1 of 1)	IFM1	3641389	-0.825821	5.15133	0.0615782
peak_3896	C4_01320C_A	Promoter (<=1kb)	OPT6	3635603	-0.359964	7.45991	0.061667
peak_2345	C2_06590C_A	5' UTR	GIT1	3646562	-0.875212	5.22264	0.0617854
peak_3267	C3_04490W_A	Promoter (1-2kb)	RAX1	3635256	-0.444506	6.98764	0.0618826
peak_3390	C3_05320W_A	Promoter (<=1kb)	NA	3643648	-0.810605	5.13579	0.0619583
peak_5597	C6_04400W_A	Distal Intergenic	NA	3645949	-0.607063	5.60361	0.0620062
peak_6295	CR_01010W_A	5' UTR	TEN1	3640421	-0.367526	7.27888	0.062087
peak_2951	C3_01160W_A	Promoter (<=1kb)	MSS4	3647957	-0.347218	7.9766	0.0622945
peak_2326	C2_06430C_A	Exon (C2_06430C_A/C2_06430C_A, exon 1 of 1)	NA	3646558	0.34548	7.80423	0.0623183
peak_611	C1_05260C_A	Promoter (<=1kb)	SDH1	3642477	0.595267	6.68365	0.0626184
peak_522	C1_04470C_A	Promoter (<=1kb)	NA	3646142	0.51823	5.98646	0.0626184
peak_7448	CR_10200W_A	Promoter (<=1kb)	NA	3638919	0.406114	7.05837	0.0626184
peak_182	C1_01440C_A	Promoter (<=1kb)	POX18	30514962	-0.338782	8.46483	0.0626184
peak_3825	C4_00750C_A	Promoter (<=1kb)	NA	3645763	-0.367942	9.97551	0.0626184
peak_6214	CR_00270C_A	Exon (CR_00260W_A/CR_00260W_A, exon 1 of 1)	NA	3639720	-0.453157	6.47812	0.0626184
peak_3050	C3_02150C_A	Promoter (<=1kb)	ERG6	3636655	-0.468547	6.38058	0.0626184
peak_4956	C5_04140W_A	Promoter (<=1kb)	NA	3636524	-0.647127	6.84434	0.0626184
peak_1894	C2_02230C_A	Promoter (<=1kb)	NA	3635775	0.86808	4.97472	0.0626416
peak_1050	C1_09450C_A	Promoter (<=1kb)	NUP188	3634858	-0.520272	6.52385	0.0627472
peak_604	C1_05170C_A	Promoter (<=1kb)	CUE5	3642467	0.370755	7.23346	0.0628406
peak_275	C1_02130C_A	Downstream (<1kb)	GAL1	3644581	0.958399	5.03791	0.0628656
peak_6069	C7_03580C_A	Promoter (<=1kb)	NA	3646238	0.34534	7.75451	0.0628656
peak_3935	C4_01720C_A	Promoter (<=1kb)	NA	3635589	0.530771	5.93049	0.062907
peak_6950	CR_07270C_A	Promoter (<=1kb)	HGT16	3646026	-0.72474	5.41639	0.0629329
peak_6733	CR_05380C_A	Exon (CR_05370W_A/CR_05370W_A, exon 1 of 1)	YCP4	3648032	0.463489	7.10831	0.0631115
peak_3715	C3_07730W_A	Promoter (1-2kb)	WOR4	3638454	-0.900469	4.84864	0.0632171
peak_7179	CR_08640C_A	Exon (CR_08640C_A/CR_08640C_A, exon 1 of 1)	NA	3642112	-0.561783	5.85339	0.063402
peak_3407	C3_05450C_A	Distal Intergenic	NA	3643669	0.370724	7.40519	0.0634474
peak_703	C1_06300W_A	Promoter (<=1kb)	NA	30515004	-0.607785	5.84603	0.0639228
peak_3787	C4_00340W_A	Promoter (<=1kb)	PTC7	3645000	0.42772	6.91366	0.0639242
peak_1172	C1_10490W_A	Promoter (<=1kb)	LKH1	3647187	-0.456586	6.31079	0.0640958
peak_2752	C2_10500W_A	Downstream (<1kb)	tF(GAA)4	30515166	0.590347	7.29652	0.0641248
peak_946	C1_08430W_A	Promoter (<=1kb)	CAF16	3646486	0.4322	6.85709	0.0641248
peak_1434	C1_13090W_A	Downstream (1-2kb)	NA	NA	0.404503	7.08604	0.0641248
peak_1130	C1_10210C_A	Promoter (<=1kb)	CLA4	3634878	-0.454601	6.39471	0.0641248
peak_3372	C3_05200W_A	Promoter (<=1kb)	RPS19A	30515208	-0.655348	5.47778	0.0641248
peak_5546	C6_04120C_A	Exon (C6_04130C_A/C6_04130C_A, exon 1 of 1)	NA	3647974	-0.386519	7.25015	0.0646343
peak_5876	C7_01690W_A	Distal Intergenic	NA	3636980	0.499231	6.438	0.0646524
peak_1201	C1_10790W_A	Promoter (<=1kb)	CDC48	3644440	0.386495	7.58208	0.0646524
peak_3933	C4_01700C_A	Promoter (<=1kb)	NHP6A	30515244	0.533291	6.23447	0.0648117
peak_917	C1_08270C_A	Promoter (<=1kb)	MED15	3640761	-0.360929	7.65169	0.0648709
peak_5930	C7_02030W_A	Distal Intergenic	HSP90	3636951	-0.527362	5.97308	0.0650637
peak_541	C1_04660W_A	Promoter (<=1kb)	DUR1,2	3644771	-0.467104	6.54349	0.0650828
peak_5999	C7_02830C_A	Downstream (1-2kb)	LIP5	3641356	-0.492102	6.1359	0.0650828
peak_737	C1_06610C_A	Promoter (<=1kb)	HAK1	3639546	0.891078	4.84774	0.065114
peak_2337	C2_06470W_A	Promoter (<=1kb)	RTA2	3646567	-0.37258	8.23892	0.065582
peak_6877	CR_06580W_A	Downstream (1-2kb)	NA	3646627	-0.606103	5.70577	0.065582
peak_1198	C1_10740C_A	Promoter (<=1kb)	ASR1	3644402	0.557503	5.98208	0.0657502
peak_4952	C5_04130C_A	Promoter (<=1kb)	CHT2	3636523	-0.694072	5.6721	0.0661537
peak_510	C1_04360C_A	Promoter (<=1kb)	NA	30514985	0.382267	6.98044	0.0663104
peak_7325	CR_09240C_A	Promoter (<=1kb)	NA	3641919	0.405516	7.46671	0.0666079
peak_3447	C3_05720C_A	Promoter (<=1kb)	KIP3	3641716	-0.534473	6.55677	0.0666293
peak_3329	C3_04920C_A	Promoter (<=1kb)	NA	3635268	0.539732	6.10326	0.0666478
peak_1292	C1_11670W_A	Promoter (<=1kb)	NA	3645338	0.34824	8.03104	0.0666478
peak_931	C1_08330C_A	Promoter (<=1kb)	ADH2	3640751	-0.459592	6.71807	0.0666478
peak_3463	C3_05870C_A	Promoter (<=1kb)	UBP1	3641760	-0.757298	5.25976	0.0666478
peak_2786	C2_10720C_A	Exon (C2_10720C_A/C2_10720C_A, exon 1 of 1)	NA	3641209	-0.489086	6.26808	0.0666831
peak_2394	C2_06860W_A	Promoter (<=1kb)	LTE1	3643495	-0.574318	5.63671	0.0666891
peak_7290	CR_09050C_A	Exon (CR_09050C_A/CR_09050C_A, exon 1 of 1)	NA	3648197	-0.500524	6.11393	0.0668294
peak_1850	C2_01780W_A	Exon (C2_01780W_A/C2_01780W_A, exon 1 of 1)	MSB2	3635830	-0.552984	5.84531	0.0668294
peak_4353	C4_05900C_A	Promoter (<=1kb)	NA	3641796	-0.727019	5.32541	0.0668294
peak_4918	C5_03930C_A	Promoter (<=1kb)	NA	3647447	-1.12776	4.4827	0.0670156
peak_2566	C2_08880W_A	Exon (C2_08880W_A/C2_08880W_A, exon 1 of 1)	BUD20	3645800	-0.379041	7.39597	0.0670566
peak_28	C1_00180W_A	Exon (C1_00180W_A/C1_00180W_A, exon 1 of 1)	RPL16A	3639338	-0.5861	5.68612	0.0671406
peak_5508	C6_03810W_A	5' UTR	NA	3640286	0.363321	7.29017	0.0672123
peak_590	C1_05130W_A	Distal Intergenic	NA	NA	0.357003	7.39071	0.0672123
peak_5802	C7_00930W_A	5' UTR	GPH1	3637956	0.850147	5.05346	0.0672898
peak_3454	C3_05810C_A	5' UTR	SKN1	3641755	-0.767336	5.1625	0.0672898
peak_7082	CR_08220C_A	Promoter (<=1kb)	tK(UUU)3	30515436	-0.472849	6.62027	0.0673542
peak_4335	C4_05720W_A	Promoter (<=1kb)	NA	NA	-0.502646	6.40474	0.0675006
peak_1960	C2_02980C_A	Promoter (<=1kb)	DLD1	3643025	0.354756	7.86674	0.0675048
peak_7420	CR_09960C_A	Promoter (<=1kb)	UGA3	3638926	0.325157	8.22953	0.0675225
peak_2125	C2_04370W_A	Promoter (<=1kb)	NA	3645460	0.446504	6.46991	0.0675579
peak_3570	C3_06710W_A	Promoter (<=1kb)	NA	3638448	0.377286	7.34777	0.0676416
peak_372	C1_03120W_A	Promoter (<=1kb)	NA	3636926	-0.570762	5.84421	0.0676416
peak_7235	CR_08860W_A	Exon (CR_08860W_A/CR_08860W_A, exon 1 of 1)	PDK2	3641876	-0.86827	5.33976	0.0676416
peak_2777	C2_10650W_A	Downstream (2-3kb)	NA	30515168	-0.318465	8.16709	0.0681368
peak_5996	C7_02810W_A	Downstream (2-3kb)	PRX1	3641357	-0.374561	7.49643	0.0681368
peak_406	C1_03390W_A	Promoter (<=1kb)	EHT1	3636894	0.394597	6.80897	0.0682236
peak_5619	C6_04460W_A	Promoter (<=1kb)	tL(CAA)3	30515346	-0.318315	8.71414	0.0687011
peak_2026	C2_03400C_A	Promoter (<=1kb)	DFG16	3637413	0.575511	5.79474	0.0687733
peak_5773	C7_00720W_A	Promoter (<=1kb)	RTF1	3637964	0.318143	8.22252	0.0687733
peak_2536	C2_08580W_A	Distal Intergenic	NA	3643916	-0.781136	5.19388	0.0688575
peak_7166	CR_08580C_A	Exon (CR_08580C_A/CR_08580C_A, exon 1 of 1)	NA	3642105	-0.451889	6.41419	0.0689515
peak_691	C1_06290C_A	Downstream (<1kb)	NA	NA	-0.648839	5.48498	0.0690853
peak_6031	C7_03260C_A	Promoter (<=1kb)	NA	3641366	0.427374	6.64631	0.0691849
peak_6128	C7_04220W_A	5' UTR	NA	NA	-0.338137	8.43641	0.0691849
peak_6019	C7_03170W_A	Promoter (<=1kb)	IFA21	3641344	-0.757811	5.23452	0.0691849
peak_3126	C3_03110W_A	Promoter (<=1kb)	NA	3638400	-0.991382	4.69354	0.0691849
peak_1247	C1_11260C_A	Promoter (<=1kb)	NA	30515051	-0.579326	5.61499	0.0692721
peak_5840	C7_01390W_A	Promoter (1-2kb)	NA	3645892	0.501741	6.2013	0.0695311
peak_4436	C4_06710W_A	Promoter (<=1kb)	NA	3642948	0.43435	6.55615	0.0695463
peak_356	C1_02970W_A	Promoter (<=1kb)	NA	3636835	0.395519	7.09685	0.0695463
peak_2911	C3_00800W_A	5' UTR	MIH1	3648188	-0.591023	5.62279	0.0695463
peak_2787	C2_10730W_A	Promoter (<=1kb)	NA	3641210	-0.597068	6.04288	0.0695463
peak_708	C1_06330W_A	Distal Intergenic	NA	NA	-0.718971	5.31182	0.0695463
peak_3651	C3_07320W_A	Promoter (<=1kb)	MDS3	3638464	-0.626206	5.6487	0.0698792
peak_4164	C4_04020C_A	Promoter (<=1kb)	NA	3641215	-0.416579	7.15757	0.0699784
peak_4576	C5_00510W_A	Promoter (1-2kb)	NA	3641539	0.333225	8.02165	0.0702545
peak_7222	CR_08750C_A	Exon (CR_08750C_A/CR_08750C_A, exon 1 of 1)	tG(GCC)6	30515446	-0.332687	7.92365	0.0703237
peak_6260	CR_00740C_A	Promoter (<=1kb)	BMT3	3640439	-0.303478	9.03836	0.0703645
peak_4040	C4_02730C_A	5' UTR	NA	NA	0.302351	9.44981	0.0704532
peak_5035	C5_04950C_A	Promoter (<=1kb)	NA	3636422	-0.53389	5.82925	0.0704532
peak_3282	C3_04530C_A	Downstream (1-2kb)	TEC1	3635261	0.285644	10.0247	0.0704581
peak_3229	C3_04050W_A	Exon (C3_04060C_A/C3_04060C_A, exon 1 of 1)	tA(AGC)2	30515199	-0.486641	6.52127	0.0704581
peak_2480	C2_07920W_A	5' UTR	NA	3642294	0.875181	6.23523	0.0704892
peak_3153	C3_03380W_A	Distal Intergenic	NA	3638367	0.368454	7.28198	0.0706929
peak_3769	C4_00130W_A	Downstream (<1kb)	RBT5	3645007	-0.490854	6.1966	0.0707515
peak_4821	C5_03010W_A	Promoter (<=1kb)	NA	3637819	-0.414641	6.68134	0.0708018
peak_2864	C3_00520W_A	Promoter (<=1kb)	NA	3640513	-0.567305	5.68285	0.0708018
peak_7469	CR_10340W_A	Exon (CR_10340W_A/CR_10340W_A, exon 1 of 1)	PTP3	3638940	0.84416	5.21758	0.0710104
peak_933	C1_08350C_A	Exon (C1_08350C_A/C1_08350C_A, exon 1 of 1)	NA	30515030	0.526378	6.09731	0.0710104
peak_3518	C3_06320W_A	Promoter (<=1kb)	ALS7	3642234	0.420754	6.5406	0.0710104
peak_2965	C3_01250W_A	Promoter (<=1kb)	PMC1	3636627	-0.739452	5.3303	0.0710864
peak_1995	C2_03210W_A	Downstream (<1kb)	NA	30515098	0.301322	8.78882	0.0714598
peak_807	C1_07220W_A	Promoter (<=1kb)	NA	3644460	0.3245	8.55927	0.0716225
peak_6105	C7_04060W_A	Exon (C7_04060W_A/C7_04060W_A, exon 1 of 1)	NA	3643156	-0.719202	5.27585	0.0716225
peak_687	C1_06280C_A	Promoter (1-2kb)	UME6	3647522	-0.56254	5.81552	0.0718856
peak_3239	C3_04110C_A	Promoter (<=1kb)	MBP1	3635281	0.413249	6.68875	0.0721176
peak_2498	C2_08080C_A	Promoter (<=1kb)	IFM3	3642335	0.3518	7.32459	0.0721176
peak_1041	C1_09330W_A	5' UTR	NA	3634802	-0.616828	6.01505	0.0721176
peak_251	C1_01980W_A	Promoter (<=1kb)	HGT1	3645420	-0.368731	7.31576	0.0723414
peak_3639	C3_07260C_A	5' UTR	ECM29	3638433	0.595541	5.66739	0.0723693
peak_7167	CR_08590W_A	Exon (CR_08590W_A/CR_08590W_A, exon 1 of 1)	NA	3642106	-0.503964	6.17329	0.0723693
peak_3827	C4_00760W_A	Exon (C4_00760W_A/C4_00760W_A, exon 1 of 1)	ZCF21	3645762	-0.56663	5.82132	0.0723693
peak_109	C1_00790W_A	Promoter (<=1kb)	NA	3639348	-0.716796	5.4939	0.0723693
peak_228	C1_01750W_A	Promoter (<=1kb)	NA	3645413	0.498589	6.12161	0.0724275
peak_4665	C5_01220W_A	5' UTR	NA	3642620	-0.494625	6.29309	0.0724275
peak_411	C1_03400W_A	Promoter (<=1kb)	NA	3636904	0.479331	6.11477	0.0725203
peak_4834	C5_03130W_A	Promoter (<=1kb)	SUT1	3637706	0.312378	8.55997	0.0725203
peak_3631	C3_07180C_A	Promoter (<=1kb)	BMT1	3638535	-0.402327	7.17213	0.0725203
peak_6756	CR_05600C_A	Exon (CR_05600C_A/CR_05600C_A, exon 1 of 2)	tC(GCA)1	30515411	0.630935	5.5561	0.0726012
peak_860	C1_07700C_A	Promoter (1-2kb)	VRG4	3641768	-0.41059	7.00687	0.0726012
peak_1254	C1_11310C_A	Promoter (<=1kb)	PSP1	3644551	-0.676782	5.46601	0.0726012
peak_1058	C1_09540W_A	Distal Intergenic	NA	3634885	-0.360006	7.27647	0.072765
peak_3312	C3_04800C_A	Promoter (<=1kb)	NA	3635216	0.606602	5.51568	0.0728099
peak_5495	C6_03710W_A	Promoter (<=1kb)	ALS9	3640281	0.33822	8.11229	0.0728099
peak_444	C1_03760C_A	Promoter (<=1kb)	STR2	3644689	0.321034	8.11656	0.0730543
peak_5669	C6_04610C_A	Promoter (<=1kb)	NAG3	3645969	-0.356225	7.3329	0.0733659
peak_7527	CR_10810C_A	Exon (CR_10810C_A/CR_10810C_A, exon 1 of 1)	NA	3638949	-0.453094	6.39322	0.0733659
peak_6954	CR_07300W_A	Promoter (<=1kb)	NA	3646059	-0.536659	6.04786	0.0734768
peak_566	C1_04950C_A	Promoter (<=1kb)	RPM2	3644790	0.328801	7.73991	0.0734788
peak_5274	C6_01540C_A	Promoter (<=1kb)	NA	30515333	0.282326	10.1377	0.0734788
peak_4855	C5_03310C_A	Promoter (<=1kb)	PCL1	3646356	-0.75638	5.21233	0.0734788
peak_1574	C1_14130W_A	Promoter (<=1kb)	FTR1	3643318	0.315277	8.49958	0.0736081
peak_5372	C6_02490C_A	Downstream (<1kb)	NA	3639171	1.14526	5.11115	0.07369
peak_2120	C2_04310W_A	Promoter (<=1kb)	ERG10	3648275	-0.42869	6.67073	0.0739798
peak_6576	CR_03720W_A	Exon (CR_03720W_A/CR_03720W_A, exon 1 of 1)	TAL1	3643225	0.855716	5.26968	0.0740165
peak_4333	C4_05700W_A	Promoter (<=1kb)	ZCF5	3641819	-0.361401	7.13004	0.0740165
peak_3730	C3_07790W_A	Exon (C3_07790W_A/C3_07790W_A, exon 1 of 1)	STD1	3647459	-0.433608	6.543	0.0740165
peak_5179	C6_00720C_A	Promoter (<=1kb)	COX15	3647071	0.347386	7.54569	0.0741378
peak_1340	C1_12010C_A	5' UTR	KIP4	3642032	-0.658584	5.50575	0.0741896
peak_1073	C1_09660W_A	Promoter (<=1kb)	DOA1	3634871	0.399873	6.66952	0.074253
peak_6933	CR_07070C_A	Promoter (<=1kb)	ALS3	3647965	-0.357639	7.15523	0.07437
peak_3520	C3_06320W_A	Exon (C3_06320W_A/C3_06320W_A, exon 1 of 1)	ALS7	3642234	0.416883	6.59537	0.0744642
peak_4882	C5_03500W_A	Exon (C5_03500W_A/C5_03500W_A, exon 1 of 1)	GAP6	3646968	0.719425	5.36201	0.074826
peak_2600	C2_09150W_A	Promoter (1-2kb)	MIT1	3644089	-0.373998	7.10286	0.0749773
peak_5498	C6_03760C_A	Promoter (<=1kb)	SHM2	3640306	-0.363867	7.12064	0.0754592
peak_1372	C1_12440W_A	Promoter (<=1kb)	NA	3642012	-0.358395	7.64836	0.0754756
peak_6698	CR_05050W_A	Exon (CR_05050W_A/CR_05050W_A, exon 1 of 1)	GLN1	3646386	-0.568365	5.62791	0.0756085
peak_793	C1_07120W_A	Promoter (<=1kb)	GAP4	3644463	-0.816978	4.97691	0.0756085
peak_5034	C5_04950C_A	Promoter (<=1kb)	NA	3636422	-0.529015	6.10852	0.076075
peak_3377	C3_05230W_A	Promoter (<=1kb)	SAP3	3635197	0.432534	6.42741	0.0760824
peak_7447	CR_10200W_A	Promoter (<=1kb)	NA	3638919	0.451763	6.22911	0.0760977
peak_1567	C1_14110C_A	Exon (C1_14110C_A/C1_14110C_A, exon 1 of 1)	RPL4B	3643347	-0.382413	6.98132	0.0761745
peak_7470	CR_10350C_A	Exon (CR_10340W_A/CR_10340W_A, exon 1 of 1)	TRX1	3638950	0.762584	5.38878	0.0763667
peak_2036	C2_03500W_A	Distal Intergenic	NA	3637345	0.603759	5.59349	0.076452
peak_6779	CR_05750W_A	Promoter (<=1kb)	NA	3646696	0.360784	7.12705	0.0770694
peak_12	C1_00080C_A	Promoter (<=1kb)	RCA1	3639303	-0.395433	6.93603	0.0772435
peak_4646	C5_01110W_A	Distal Intergenic	NA	3642623	-0.33535	8.32317	0.0772634
peak_1586	C1_14210C_A	Promoter (<=1kb)	IML2	3643302	0.324004	8.07336	0.077384
peak_4881	C5_03490C_A	Promoter (<=1kb)	NA	3646967	0.292878	9.57298	0.077509
peak_6938	CR_07120C_A	Promoter (<=1kb)	NA	3648225	-0.588479	6.23635	0.077509
peak_6788	CR_05850W_A	Promoter (<=1kb)	tV(AAC)4	30515414	-0.369867	8.24399	0.0776857
peak_2461	C2_07730W_A	Promoter (<=1kb)	YVC1	3642303	-0.499206	5.98043	0.0777508
peak_7394	CR_09780C_A	Distal Intergenic	IFA14	3639012	-0.832955	5.03583	0.0777508
peak_3474	C3_05980C_A	Promoter (<=1kb)	FAA2	3641731	-0.451373	6.45926	0.0778022
peak_3534	C3_06460C_A	Promoter (<=1kb)	tH(GUG)3	30515217	-0.285221	9.46136	0.0779491
peak_6281	CR_00910W_A	Promoter (<=1kb)	NA	30515371	-0.736053	5.23231	0.0780954
peak_3502	C3_06190C_A	Promoter (1-2kb)	ALS6	3642266	0.304954	8.43866	0.0782967
peak_1005	C1_09120W_A	Promoter (1-2kb)	IPT1	3634941	-0.360885	7.02787	0.0786613
peak_3394	C3_05360C_A	Promoter (<=1kb)	NA	3643676	-0.541796	5.93769	0.0790099
peak_3021	C3_01890C_A	Intron (C3_01890C_A/C3_01890C_A, intron 1 of 1)	NA	3636561	0.340297	7.8747	0.0790168
peak_3872	C4_01110W_A	Promoter (<=1kb)	tD(GUC)6	30515233	0.317157	8.15114	0.0791549
peak_1205	C1_10810W_A	Exon (C1_10810W_A/C1_10810W_A, exon 1 of 1)	NA	3644436	0.792815	5.0543	0.0792777
peak_7116	CR_08380C_A	Exon (CR_08380C_A/CR_08380C_A, exon 2 of 2)	NA	3642114	-0.393961	6.98983	0.0797378
peak_5368	C6_02450W_A	Promoter (<=1kb)	NA	3639167	-0.410097	7.0248	0.0797378
peak_5422	C6_03080C_A	Promoter (<=1kb)	ADO1	3639274	-0.417819	6.43169	0.0800059
peak_2760	C2_10540W_A	Exon (C2_10550C_A/C2_10550C_A, exon 1 of 1)	NA	3641200	-0.541145	5.77985	0.0800059
peak_3027	C3_01900C_A	Promoter (<=1kb)	NA	3636559	-0.553605	5.77638	0.0800059
peak_6561	CR_03600C_A	Promoter (<=1kb)	NA	3643207	-0.626282	5.41555	0.0800059
peak_585	C1_05100W_A	Exon (C1_05100W_A/C1_05100W_A, exon 1 of 1)	NA	3647669	0.580937	5.94691	0.0800535
peak_141	C1_01060W_A	Promoter (<=1kb)	MBF1	3640171	0.401228	6.62284	0.0800535
peak_6897	CR_06820W_A	Exon (CR_06820W_A/CR_06820W_A, exon 1 of 1)	NA	3647325	-0.44653	6.27928	0.0800535
peak_6368	CR_01960C_A	Exon (CR_01960C_A/CR_01960C_A, exon 1 of 1)	MRS2	3640110	-0.708505	5.29729	0.0800535
peak_4970	C5_04360C_A	Promoter (<=1kb)	NA	3636483	0.427128	6.37059	0.0803068
peak_4421	C4_06540W_A	Promoter (<=1kb)	MNN4	3642784	-0.329581	7.66228	0.0803242
peak_6312	CR_01250C_A	Promoter (<=1kb)	NA	3640403	-0.289362	9.51605	0.0807568
peak_6965	CR_07440W_A	Promoter (<=1kb)	ACE2	3646034	-0.464491	6.25534	0.0807568
peak_3750	C3_07950C_A	Exon (C3_07950C_A/C3_07950C_A, exon 1 of 1)	SRB1	3647454	-0.566412	5.72521	0.0807568
peak_6451	CR_02630C_A	Distal Intergenic	NA	3642568	0.349484	7.69848	0.0809236
peak_4103	C4_03420C_A	Promoter (<=1kb)	NA	NA	0.438601	6.56945	0.0810221
peak_7205	CR_08700C_A	Exon (CR_08700C_A/CR_08700C_A, exon 1 of 1)	ARF1	3642130	-0.332666	7.72473	0.0810221
peak_5875	C7_01680C_A	Promoter (1-2kb)	NA	3636981	0.348685	7.78085	0.081084
peak_4153	C4_03940C_A	Promoter (<=1kb)	PYC2	3637323	0.316707	8.12937	0.0811543
peak_3744	C3_07890W_A	Exon (C3_07900C_A/C3_07900C_A, exon 1 of 1)	TIM8	3647469	-0.406054	6.97718	0.0811543
peak_6115	C7_04160W_A	Promoter (<=1kb)	NA	3643127	0.4943	5.92725	0.081165
peak_1785	C2_01210C_A	5' UTR	HNM1	3638857	-0.367188	7.72203	0.0813248
peak_4420	C4_06530C_A	Promoter (<=1kb)	XUT1	3642785	-0.300227	8.71313	0.0813604
peak_2856	C3_00370C_A	Promoter (<=1kb)	BUD21	3640541	0.511685	5.90446	0.0814698
peak_2806	C3_00010C_A	5' UTR	NA	3640600	-0.305578	8.89981	0.0814698
peak_4722	C5_01960C_A	Promoter (<=1kb)	NA	3643738	0.492346	6.00193	0.0814711
peak_5865	C7_01560C_A	Promoter (<=1kb)	NUP	3637041	-0.42099	6.67013	0.0815417
peak_4727	C5_02000C_A	Promoter (1-2kb)	ACH1	3643773	0.300872	8.49711	0.0818058
peak_5591	C6_04380W_A	Exon (C6_04380W_A/C6_04380W_A, exon 1 of 1)	ALS2	3645724	-0.435247	6.4622	0.0818058
peak_2553	C2_08790W_A	Promoter (<=1kb)	JEM1	3643876	0.532886	6.05528	0.0818204
peak_2268	C2_05710C_A	Exon (C2_05700W_A/C2_05700W_A, exon 1 of 1)	NA	30515127	0.384178	6.91333	0.0825385
peak_5152	C6_00440C_A	Exon (C6_00440C_A/C6_00440C_A, exon 1 of 1)	FET34	3647131	-0.558386	5.77738	0.0826135
peak_115	C1_00850W_A	Promoter (1-2kb)	IHD2	3639359	-0.350875	7.75766	0.0833081
peak_625	C1_05440C_A	Promoter (<=1kb)	NA	3642489	0.528067	5.97031	0.0834405
peak_3240	C3_04110C_A	Promoter (<=1kb)	MBP1	3635281	0.413226	6.71647	0.0834405
peak_3878	C4_01150W_A	Exon (C4_01150W_A/C4_01150W_A, exon 1 of 1)	ASK1	3635656	-0.573861	5.57566	0.0836005
peak_4057	C4_02930W_A	Promoter (<=1kb)	NA	3637876	-0.592434	5.59096	0.0837335
peak_5713	C7_00200W_A	5' UTR	NA	3637968	-0.539681	5.77566	0.0837549
peak_794	C1_07130C_A	Exon (C1_07130C_A/C1_07130C_A, exon 1 of 1)	NA	3644462	-0.771028	5.05151	0.0837549
peak_5872	C7_01650W_A	Exon (C7_01660C_A/C7_01660C_A, exon 1 of 1)	NA	3636984	0.536644	5.84166	0.0838583
peak_7474	CR_10350C_A	Promoter (<=1kb)	TRX1	3638950	0.98055	4.80958	0.0840598
peak_755	C1_06840C_A	Promoter (<=1kb)	NA	30515012	0.444001	6.21392	0.0841879
peak_38	C1_00220W_A	Exon (C1_00220W_A/C1_00220W_A, exon 1 of 1)	PHR2	3639334	-0.410869	6.52112	0.0841879
peak_4796	C5_02690W_A	Promoter (<=1kb)	NA	3637775	0.356432	7.26971	0.0841931
peak_5673	C6_04620C_A	5' UTR	NAG4	3645978	-0.336794	7.41253	0.084887
peak_483	C1_04130W_A	Promoter (<=1kb)	ERB1	3644702	-0.403836	6.48908	0.084887
peak_4034	C4_02720C_A	Promoter (<=1kb)	NA	3637857	0.277492	9.60546	0.085402
peak_2024	C2_03390C_A	Exon (C2_03380W_A/C2_03380W_A, exon 1 of 1)	HSP78	3637414	0.527009	6.18025	0.0858489
peak_6888	CR_06700C_A	Promoter (<=1kb)	SOL3	3646625	0.374214	7.01968	0.0858489
peak_4049	C4_02830C_A	Promoter (<=1kb)	HCA4	3637911	-0.695986	5.52641	0.0858489
peak_161	C1_01170C_A	Promoter (<=1kb)	ZCF17	3640205	0.367734	6.91774	0.0859356
peak_2565	C2_08880W_A	Promoter (<=1kb)	BUD20	3645800	-0.503399	6.18412	0.0860061
peak_3563	C3_06610W_A	Promoter (<=1kb)	NA	3642248	0.578647	5.58742	0.0862729
peak_7334	CR_09310W_A	Exon (CR_09310W_A/CR_09310W_A, exon 1 of 1)	NA	3641923	-0.836131	4.84238	0.0863289
peak_4493	C4_07220C_A	Promoter (<=1kb)	NA	3642955	-0.478982	6.06941	0.0868454
peak_2260	C2_05640W_A	Exon (C2_05640W_A/C2_05640W_A, exon 1 of 1)	NA	3645566	-0.424324	6.51569	0.0870585
peak_3633	C3_07180C_A	Promoter (1-2kb)	BMT1	3638535	-0.678474	5.25981	0.0871911
peak_2219	C2_05380W_A	Promoter (<=1kb)	NA	3643432	0.762378	5.14737	0.0872874
peak_3439	C3_05670C_A	Promoter (<=1kb)	NA	NA	0.586456	5.66912	0.0872874
peak_7073	CR_08190W_A	Exon (CR_08200C_A/CR_08200C_A, exon 1 of 1)	NA	3642084	-0.56694	5.66101	0.0872874
peak_2202	C2_05180W_A	Promoter (<=1kb)	WH11	30515117	0.318268	8.13528	0.0875288
peak_7175	CR_08630W_A	Exon (CR_08630W_A/CR_08630W_A, exon 1 of 1)	CDC23	3642111	-0.412938	6.76031	0.0878991
peak_897	C1_08020W_A	Promoter (<=1kb)	UBA2	3640701	0.494431	5.94939	0.0879033
peak_2111	C2_04230W_A	Promoter (<=1kb)	BAT21	3637356	0.410529	6.66683	0.0879049
peak_2395	C2_06880C_A	Promoter (<=1kb)	PRB1	3643521	0.341439	7.18506	0.0879049
peak_6757	CR_05600C_A	Promoter (<=1kb)	tC(GCA)1	30515411	0.29276	9.0999	0.0879049
peak_1337	C1_12010C_A	5' UTR	KIP4	3642032	-0.586501	5.89056	0.0879049
peak_7013	CR_07810W_A	Promoter (1-2kb)	YHB5	3647343	0.580976	5.9306	0.0881048
peak_3590	C3_06850W_A	Promoter (<=1kb)	FCR1	3638542	0.295615	8.40223	0.0881048
peak_5763	C7_00660W_A	Distal Intergenic	GAC1	3638025	0.468345	6.29838	0.0887815
peak_3868	C4_01080W_A	Promoter (<=1kb)	RAT1	3635686	-0.329502	7.53349	0.0887815
peak_5966	C7_02370W_A	Exon (C7_02370W_A/C7_02370W_A, exon 1 of 1)	NA	3636930	-0.537157	5.68681	0.0888408
peak_1811	C2_01470W_A	Promoter (<=1kb)	SRB9	3635845	-0.396754	6.57348	0.089276
peak_3132	C3_03170W_A	Exon (C3_03170W_A/C3_03170W_A, exon 1 of 1)	SEC13	3638425	-0.546361	5.6857	0.0895541
peak_5037	C5_04960W_A	5' UTR	NA	3636423	-0.570497	5.51382	0.0895541
peak_5421	C6_03030W_A	Promoter (<=1kb)	SAP5	3639268	-0.679522	5.29574	0.0895979
peak_2770	C2_10600W_A	Exon (C2_10600W_A/C2_10600W_A, exon 1 of 1)	NA	3641245	0.370034	7.67447	0.089624
peak_3555	C3_06560W_A	Promoter (<=1kb)	NA	3642276	0.399557	6.52515	0.089707
peak_6030	C7_03270W_A	Promoter (<=1kb)	NA	3641365	0.302338	8.04423	0.089707
peak_5474	C6_03600C_A	Promoter (<=1kb)	NA	3640295	-0.533915	5.62426	0.089707
peak_873	C1_07880C_A	Promoter (<=1kb)	GCS1	3640742	0.331452	7.40695	0.0898757
peak_2281	C2_05820W_A	Promoter (<=1kb)	NA	3647482	0.397517	6.69667	0.0900502
peak_4289	C4_05140C_A	Promoter (<=1kb)	GDB1	3647409	0.298242	8.74734	0.0900502
peak_4958	C5_04190W_A	Promoter (1-2kb)	MRV2	3636545	-0.408848	6.5026	0.0900502
peak_272	C1_02120C_A	Promoter (<=1kb)	SHA3	3644580	0.295927	8.29	0.0904555
peak_3632	C3_07180C_A	Promoter (<=1kb)	BMT1	3638535	-0.372906	7.60099	0.0904555
peak_5712	C7_00200W_A	Promoter (<=1kb)	NA	3637968	-0.46254	6.43863	0.0904555
peak_7489	CR_10540C_A	Exon (CR_10540C_A/CR_10540C_A, exon 1 of 1)	MCD1	3639044	-0.531654	5.84409	0.0904555
peak_447	C1_03780C_A	5' UTR	HMG1	3644687	-0.716697	5.08292	0.0904555
peak_4521	C5_00190C_A	Exon (C5_00190C_A/C5_00190C_A, exon 1 of 1)	FAS1	3641593	-0.721658	5.23392	0.0904555
peak_1280	C1_11500C_A	5' UTR	ARO7	3645337	-0.761662	5.26215	0.0904555
peak_1456	C1_13250W_A	5' UTR	NA	3636143	0.471439	6.06422	0.0904758
peak_2935	C3_01010W_A	Distal Intergenic	NA	NA	-0.596431	5.51824	0.0904758
peak_2042	C2_03520C_A	Downstream (<1kb)	ADAEC	3637342	0.494504	6.11044	0.0905382
peak_854	C1_07650W_A	5' UTR	NA	3646657	-0.494759	5.9669	0.0905382
peak_2199	C2_05150W_A	Exon (C2_05150W_A/C2_05150W_A, exon 1 of 1)	PEX2	3643460	-0.759647	5.01617	0.0905382
peak_7063	CR_08090W_A	Exon (CR_08090W_A/CR_08090W_A, exon 1 of 1)	SSB1	3642095	-0.442948	6.23895	0.0906958
peak_3089	C3_02620C_A	Promoter (<=1kb)	NA	3638326	-0.337624	7.90634	0.0911945
peak_5207	C6_00850W_A	Downstream (2-3kb)	NA	3644010	0.382702	6.78012	0.0915403
peak_1330	C1_11950W_A	Promoter (<=1kb)	NA	3642045	-0.342685	7.3015	0.0916473
peak_3944	C4_01800W_A	Downstream (<1kb)	NA	3635595	0.508159	6.36116	0.091862
peak_7109	CR_08350W_A	Promoter (<=1kb)	NA	3642082	0.377993	6.84474	0.0919903
peak_1112	C1_10070C_A	Promoter (<=1kb)	MNN23	3634813	-0.301831	8.30479	0.0929164
peak_1291	C1_11670W_A	Promoter (<=1kb)	NA	3645338	0.559368	5.72604	0.0930138
peak_1303	C1_11750W_A	Promoter (<=1kb)	AVT4	3645316	-0.333817	8.07239	0.0930138
peak_4038	C4_02730C_A	5' UTR	NA	NA	0.412568	6.75032	0.0933493
peak_2810	C3_00040W_A	Promoter (<=1kb)	NA	NA	-0.277698	9.03644	0.0933895
peak_4803	C5_02780W_A	Promoter (<=1kb)	NA	3637803	-0.385683	6.65561	0.0933895
peak_930	C1_08330C_A	Promoter (<=1kb)	ADH2	3640751	-0.683811	5.34462	0.0933895
peak_6194	CR_00130C_A	Promoter (<=1kb)	NA	3639709	-0.800499	4.9335	0.0933895
peak_7387	CR_09700W_A	Exon (CR_09700W_A/CR_09700W_A, exon 1 of 1)	NA	3647088	-0.776449	5.01037	0.0939578
peak_5407	C6_02820W_A	Exon (C6_02820W_A/C6_02820W_A, exon 1 of 1)	NA	NA	-0.404102	6.83579	0.0941996
peak_2785	C2_10700C_A	Exon (C2_10690W_A/C2_10690W_A, exon 2 of 2)	NA	3641207	0.585172	5.5765	0.094294
peak_7214	CR_08730W_A	Promoter (<=1kb)	tE(UUC)7	30515445	-0.313605	8.06185	0.0945996
peak_4607	C5_00730W_A	Promoter (<=1kb)	HYR3	3644119	0.408755	6.43141	0.0946427
peak_6235	CR_00440C_A	Exon (CR_00440C_A/CR_00440C_A, exon 1 of 1)	LRG1	3639727	-0.448209	6.54378	0.0946427
peak_7256	CR_08930C_A	Exon (CR_08920W_A/CR_08920W_A, exon 1 of 1)	NA	3641913	-0.351039	7.54028	0.0946652
peak_5278	C6_01560W_A	5' UTR	NA	3641652	-0.643597	5.27186	0.0946652
peak_1955	C2_02950W_A	Promoter (<=1kb)	BNA31	3643012	0.334183	7.60521	0.0947238
peak_7468	CR_10340W_A	Promoter (<=1kb)	PTP3	3638940	0.284942	9.28259	0.0949247
peak_5671	C6_04610C_A	Promoter (<=1kb)	NAG3	3645969	-0.336647	7.4891	0.0949247
peak_3795	C4_00400W_A	Exon (C4_00400W_A/C4_00400W_A, exon 1 of 1)	MNR2	3645017	-0.512594	5.96102	0.095125
peak_3063	C3_02280C_A	Promoter (<=1kb)	GFA1	3636557	-0.303653	8.39176	0.0951669
peak_4413	C4_06490C_A	Downstream (<1kb)	PRI2	3642788	-0.55112	5.90361	0.0951704
peak_2507	C2_08200W_A	Exon (C2_08200W_A/C2_08200W_A, exon 1 of 1)	NA	3648342	0.848103	5.29563	0.0952091
peak_3479	C3_06010W_A	Distal Intergenic	CAM1	3641734	-0.743001	5.25148	0.0952091
peak_3420	C3_05540C_A	Promoter (<=1kb)	NA	3643658	0.565855	5.57436	0.0958181
peak_1853	C2_01850W_A	Promoter (<=1kb)	RAD23	3635834	-0.37461	6.94259	0.0959546
peak_7399	CR_09840C_A	Exon (CR_09830W_A/CR_09830W_A, exon 1 of 1)	NA	3638988	0.962734	6.82629	0.096035
peak_6734	CR_05380C_A	Exon (CR_05380C_A/CR_05380C_A, exon 1 of 1)	YCP4	3648032	-0.491905	6.01902	0.096035
peak_6060	C7_03460W_A	5' UTR	NA	3646712	-0.436977	6.23576	0.0960791
peak_2034	C2_03500W_A	Distal Intergenic	NA	3637345	0.605147	5.87046	0.0961567
peak_2814	C3_00040W_A	Exon (C3_00030C_A/C3_00030C_A, exon 1 of 1)	NA	NA	-0.277377	8.90952	0.0961567
peak_4659	C5_01130W_A	Promoter (1-2kb)	CYC3	3642621	-0.310971	7.91561	0.0961567
peak_3381	C3_05250C_A	Promoter (1-2kb)	NA	3635199	-0.399427	6.47726	0.0961567
peak_66	C1_00430W_A	Exon (C1_00430W_A/C1_00430W_A, exon 1 of 1)	NA	3639285	-0.598273	5.53087	0.0961567
peak_2526	C2_08430C_A	5' UTR	PGA46	3643896	-0.804662	4.83374	0.0961567
peak_4471	C4_07050W_A	Promoter (<=1kb)	YDC1	3642962	0.354233	6.9066	0.0962809
peak_6441	CR_02560C_A	Promoter (<=1kb)	ASG1	3647687	0.596358	5.7097	0.0964066
peak_2349	C2_06600W_A	Promoter (<=1kb)	NA	3646563	0.277246	9.94942	0.0966605
peak_5550	C6_04130C_A	Downstream (<1kb)	ALS4	3647972	-0.45513	6.09204	0.0966605
peak_4019	C4_02550C_A	Promoter (<=1kb)	EMP70	3637919	-0.483825	6.37983	0.0966742
peak_4638	C5_01080C_A	Promoter (<=1kb)	GDS1	3642626	-0.266361	9.62023	0.0969812
peak_5140	C6_00330C_A	Promoter (<=1kb)	GNP1	3646073	0.266648	9.66649	0.0970066
peak_1000	C1_09080C_A	Promoter (<=1kb)	PGA6	3634774	-0.385665	7.44423	0.0970066
peak_5076	C5_05430W_A	Promoter (<=1kb)	PEX4	3636429	0.362431	7.36175	0.0970258
peak_6508	CR_02930W_A	Promoter (1-2kb)	NA	3642588	0.637093	5.47383	0.0970697
peak_4591	C5_00590W_A	Promoter (<=1kb)	PET9	3641587	0.272002	9.38093	0.097121
peak_1570	C1_14120C_A	Exon (C1_14120C_A/C1_14120C_A, exon 1 of 1)	RBE1	3643317	-0.378359	6.73638	0.097121
peak_6132	C7_04240C_A	Downstream (1-2kb)	NA	3643165	-0.594825	5.45658	0.097121
peak_1845	C2_01760C_A	Downstream (1-2kb)	NA	3635736	-0.554144	5.88347	0.0971454
peak_30	C1_00190C_A	Promoter (<=1kb)	NA	3639337	-0.519193	5.91259	0.0971927
peak_7379	CR_09660W_A	Promoter (<=1kb)	NA	3647092	-0.459098	6.10983	0.0974961
peak_2396	C2_06890C_A	Promoter (<=1kb)	NA	3643522	0.465402	6.06289	0.0975888
peak_5953	C7_02260W_A	Promoter (<=1kb)	NA	3637002	0.32037	7.66904	0.0975888
peak_2112	C2_04250W_A	Promoter (<=1kb)	VPS36	3637354	-0.336219	7.39301	0.0975888
peak_7485	CR_10480W_A	Exon (CR_10480W_A/CR_10480W_A, exon 1 of 1)	PGA1	3638980	-0.389556	6.62784	0.0975938
peak_2242	C2_05580W_A	Exon (C2_05580W_A/C2_05580W_A, exon 1 of 1)	NA	3645563	-0.399681	6.7549	0.0975938
peak_1553	C1_13940W_A	Exon (C1_13940W_A/C1_13940W_A, exon 1 of 1)	SIM1	3636185	-0.487723	6.03306	0.0975938
peak_3997	C4_02390W_A	Downstream (1-2kb)	PGA62	3637879	0.535013	5.61579	0.097656
peak_1133	C1_10220C_A	Promoter (<=1kb)	TPK1	3634879	0.320622	8.08041	0.097656
peak_2808	C3_00010C_A	Exon (C3_00020W_A/C3_00020W_A, exon 1 of 1)	NA	3640600	-0.28762	8.7253	0.0977062
peak_3765	C4_00100C_A	Promoter (<=1kb)	NA	3645004	-0.489177	5.88446	0.0977062
peak_3353	C3_05160C_A	Distal Intergenic	NA	3635229	-0.590227	5.70774	0.0977062
peak_2878	C3_00600W_A	Promoter (<=1kb)	IFF11	3640580	-0.52655	6.08966	0.0979356
peak_2717	C2_10210C_A	Promoter (<=1kb)	RAS1	3643927	0.266314	9.38466	0.0979504
peak_273	C1_02120C_A	Promoter (<=1kb)	SHA3	3644580	0.256075	10.8708	0.0981022
peak_7452	CR_10240W_A	5' UTR	UTP5	3638922	0.390357	6.64899	0.0982537
peak_819	C1_07320W_A	Promoter (<=1kb)	NA	30515023	0.352705	6.89168	0.0982537
peak_3015	C3_01810C_A	Promoter (<=1kb)	MNT1	3636585	-0.282559	8.61482	0.0982537
peak_6459	CR_02640W_A	Promoter (<=1kb)	RFG1	3642570	-0.339836	7.03525	0.0982537
peak_5430	C6_03170C_A	Promoter (<=1kb)	MDR1	3639260	0.293208	8.37019	0.0984453
peak_5283	C6_01600W_A	5' UTR	NA	NA	-0.531475	5.68796	0.0984453
peak_616	C1_05300C_A	Promoter (<=1kb)	PRD1	3642471	-0.481872	6.16871	0.0985858
peak_3751	C3_07950C_A	Promoter (<=1kb)	SRB1	3647454	0.295604	8.21465	0.0989234
peak_7152	CR_08510W_A	Promoter (<=1kb)	PGA13	3642138	-0.731255	5.58975	0.0989234
peak_658	C1_05920W_A	Promoter (1-2kb)	NA	3639864	-0.785031	4.81451	0.0989234
peak_3666	C3_07450C_A	Exon (C3_07450C_A/C3_07450C_A, exon 1 of 1)	NA	3638481	0.375046	6.66393	0.0990806
peak_7330	CR_09290W_A	Promoter (<=1kb)	THI13	3641921	-0.340457	7.07598	0.0990942
peak_2579	C2_09000C_A	5' UTR	NA	3645782	-0.466957	6.03146	0.0990942
peak_1808	C2_01410C_A	Promoter (1-2kb)	CLB2	3635840	0.425056	6.21965	0.0991214
peak_5169	C6_00570C_A	Promoter (<=1kb)	NHX1	3647141	0.329864	7.62552	0.0991214
peak_1632	C1_14450C_A	Exon (C1_14450C_A/C1_14450C_A, exon 1 of 1)	NA	3643299	-0.338092	7.56389	0.0991214
peak_1643	C1_14520W_A	5' UTR	NA	3643332	-0.31628	7.63836	0.0991911
peak_405	C1_03390W_A	Promoter (<=1kb)	EHT1	3636894	0.576718	5.5969	0.0993422
peak_2437	C2_07420W_A	Promoter (<=1kb)	NA	3645202	0.561416	5.61698	0.0993422
peak_4138	C4_03710C_A	Promoter (<=1kb)	NA	3645360	-0.411334	6.86098	0.0993422
peak_3656	C3_07350W_A	Promoter (<=1kb)	NA	3638476	0.398327	6.49253	0.099827
peak_3620	C3_07070C_A	Promoter (<=1kb)	NA	3638446	-0.295045	7.89687	0.0999306
peak_1274	C1_11480W_A	Promoter (<=1kb)	PHO84	3645348	-0.556336	5.54545	0.099997
peak_4737	C5_02080C_A	Distal Intergenic	HSP12	3643745	-0.322551	7.32987	0.100106
peak_6902	CR_06860C_A	Promoter (<=1kb)	ARO10	3647320	-0.489891	6.02238	0.100191
peak_2405	C2_06980W_A	Promoter (<=1kb)	NA	3643530	0.337866	7.59388	0.100302
peak_6509	CR_02930W_A	Promoter (<=1kb)	NA	3642588	0.804554	4.87884	0.100333
peak_519	C1_04460C_A	Promoter (<=1kb)	NA	3646140	-0.487419	6.00953	0.100388
peak_3973	C4_02230C_A	Promoter (<=1kb)	NA	3635693	-0.74632	5.24925	0.100388
peak_3230	C3_04060C_A	Promoter (<=1kb)	HEM13	3647390	0.311818	8.01585	0.100466
peak_4279	C4_05050C_A	Promoter (<=1kb)	PPG1	3641143	-0.293773	8.09963	0.100466
peak_6785	CR_05810C_A	Promoter (<=1kb)	tP(UGG)5	30515412	-0.30114	9.02094	0.100466
peak_5051	C5_05080W_A	Promoter (<=1kb)	GRF10	3636492	-0.30186	8.52867	0.100466
peak_615	C1_05310W_A	Promoter (<=1kb)	tP(UGG)1	30514992	-0.309433	8.08468	0.100466
peak_6695	CR_05050W_A	Distal Intergenic	GLN1	3646386	-0.337155	7.285	0.100466
peak_6495	CR_02850C_A	Promoter (1-2kb)	GZF3	3642563	-0.393746	6.67487	0.100466
peak_2525	C2_08440W_A	5' UTR	NA	NA	-0.627687	5.33536	0.100466
peak_6864	CR_06450W_A	Distal Intergenic	NA	3645279	0.454345	6.1667	0.100933
peak_5524	C6_03920W_A	Promoter (<=1kb)	SNF4	3640264	0.395643	6.40946	0.100933
peak_2374	C2_06700W_A	5' UTR	AMO2	3648021	-0.350544	7.44056	0.100933
peak_1706	C2_00450C_A	Exon (C2_00450C_A/C2_00450C_A, exon 1 of 1)	CDH1	3638814	-0.518816	5.69702	0.10112
peak_3938	C4_01740W_A	Exon (C4_01740W_A/C4_01740W_A, exon 1 of 1)	TIM12	3635587	0.57971	5.82901	0.101181
peak_365	C1_03040W_A	Promoter (<=1kb)	NA	3636842	-0.569066	5.44974	0.101197
peak_1592	C1_14230C_A	Exon (C1_14230C_A/C1_14230C_A, exon 1 of 1)	IRR1	3643305	-0.540449	5.81887	0.101573
peak_6460	CR_02640W_A	Distal Intergenic	RFG1	3642570	-0.271181	8.8134	0.10226
peak_7036	CR_07900C_A	Promoter (<=1kb)	NA	NA	-0.399987	6.83491	0.10226
peak_7234	CR_08860W_A	Promoter (<=1kb)	PDK2	3641876	-0.385119	6.44594	0.102588
peak_4372	C4_06020C_A	Exon (C4_06020C_A/C4_06020C_A, exon 1 of 1)	NA	3646519	-0.605013	5.36938	0.102588
peak_10	C1_00090W_A	5' UTR	NA	3639304	0.38754	6.47795	0.102913
peak_3654	C3_07330W_A	Promoter (<=1kb)	NA	3638478	0.490326	5.75433	0.10294
peak_3403	C3_05450C_A	Promoter (<=1kb)	NA	3643669	-0.332345	7.45205	0.102998
peak_5201	C6_00830C_A	5' UTR	CAN3	3647066	-0.662253	5.36858	0.102998
peak_5810	C7_00970C_A	Promoter (1-2kb)	YOX1	3637952	-0.733925	5.10017	0.102998
peak_1782	C2_01200C_A	Promoter (<=1kb)	REG1	3638858	0.308878	7.91899	0.103651
peak_1856	C2_01890W_A	Promoter (<=1kb)	CTF1	3635788	-0.300744	8.4142	0.103651
peak_1843	C2_01760C_A	Distal Intergenic	NA	3635736	-0.62905	5.33247	0.10375
peak_2360	C2_06670C_A	Promoter (1-2kb)	DBF2	3648101	-0.764275	5.21533	0.103919
peak_7517	CR_10760C_A	Promoter (<=1kb)	NA	3638943	0.400284	6.49774	0.103956
peak_1615	C1_14360C_A	Exon (C1_14360C_A/C1_14360C_A, exon 1 of 1)	WSC4	3643282	-0.332361	7.13655	0.104042
peak_2961	C3_01230C_A	Promoter (<=1kb)	NA	3636609	-0.398803	7.11806	0.104244
peak_2082	C2_03900C_A	Promoter (<=1kb)	NA	3637395	0.332463	7.17713	0.104445
peak_1758	C2_01010W_A	Exon (C2_01010W_A/C2_01010W_A, exon 1 of 1)	HGT8	3638875	-0.466529	5.97995	0.104445
peak_4426	C4_06550C_A	Promoter (<=1kb)	IFF5	3642782	0.311347	8.68041	0.104515
peak_7342	CR_09390C_A	Distal Intergenic	NA	3641932	-0.341299	7.4239	0.104515
peak_4140	C4_03720C_A	Promoter (<=1kb)	NA	3645359	-0.435948	6.1848	0.104515
peak_5103	C6_00130C_A	Promoter (<=1kb)	VID27	3647894	-0.438405	6.14841	0.104515
peak_4338	C4_05730W_A	Promoter (<=1kb)	NA	3641805	-0.838596	4.91947	0.104515
peak_4497	C5_00010W_A	Promoter (<=1kb)	TLO11	3647880	0.285791	8.37715	0.104536
peak_841	C1_07440W_A	5' UTR	NA	3644482	-0.460921	6.08123	0.104536
peak_2626	C2_09430W_A	Distal Intergenic	RPL3	3647719	-0.507103	6.02095	0.104577
peak_1953	C2_02650C_A	Promoter (<=1kb)	NA	NA	-0.320671	7.38174	0.104674
peak_4246	C4_04760C_A	Promoter (<=1kb)	NA	3641118	0.462052	5.89932	0.104867
peak_2178	C2_04950C_A	Exon (C2_04950C_A/C2_04950C_A, exon 1 of 1)	CYT1	3643441	-0.450625	6.06058	0.104926
peak_6505	CR_02920C_A	Downstream (<1kb)	AQY1	3642587	0.369221	6.65289	0.104993
peak_4490	C4_07220C_A	5' UTR	NA	3642955	-0.532926	5.60811	0.104995
peak_5635	C6_04500C_A	Exon (C6_04500C_A/C6_04500C_A, exon 1 of 1)	TSM1	3645953	-0.389359	6.60882	0.105181
peak_2774	C2_10630W_A	Exon (C2_10630W_A/C2_10630W_A, exon 1 of 1)	NA	3641248	-0.626479	5.44261	0.105181
peak_5552	C6_04150W_A	Promoter (<=1kb)	NA	30515343	-0.57645	5.53956	0.105205
peak_2634	C2_09460C_A	Downstream (<1kb)	RHA1	3647713	0.430259	6.28333	0.105372
peak_5874	C7_01680C_A	Promoter (<=1kb)	NA	3636981	0.355595	7.08278	0.105372
peak_350	C1_02880C_A	Promoter (<=1kb)	MIA40	3636866	0.320732	7.56796	0.105372
peak_2399	C2_06920C_A	Promoter (<=1kb)	NA	3643524	-0.450646	6.09157	0.105428
peak_1006	C1_09120W_A	Promoter (1-2kb)	IPT1	3634941	-0.357054	6.92377	0.105707
peak_7189	CR_08660W_A	Exon (CR_08660W_A/CR_08660W_A, exon 1 of 1)	PRP8	3642125	-0.347893	7.0486	0.105799
peak_5795	C7_00880C_A	Downstream (2-3kb)	NA	3638052	0.680761	5.16896	0.10603
peak_5518	C6_03850C_A	Promoter (<=1kb)	IHD1	3640291	-0.362534	8.00277	0.10603
peak_564	C1_04940C_A	5' UTR	NA	3644791	-0.701602	5.31395	0.10603
peak_5774	C7_00730W_A	Promoter (<=1kb)	MET28	3637962	0.271449	8.95584	0.106112
peak_5918	C7_01970C_A	Distal Intergenic	TOM40	3636968	-0.420242	6.14874	0.106289
peak_5819	C7_01070C_A	Promoter (1-2kb)	NA	3637949	-0.489665	5.75362	0.106309
peak_5515	C6_03840C_A	Promoter (<=1kb)	SNQ2	3640290	-0.290782	8.05499	0.106333
peak_6147	C7_04270C_A	Exon (C7_04260W_A/C7_04260W_A, exon 2 of 2)	UFE1	3643174	-0.51027	5.69723	0.106333
peak_6953	CR_07290W_A	Promoter (<=1kb)	FRE7	3646024	-0.756524	5.01324	0.106333
peak_1206	C1_10830W_A	Promoter (<=1kb)	BIG1	3644434	0.812427	5.06156	0.10678
peak_3470	C3_05940C_A	Exon (C3_05930W_A/C3_05930W_A, exon 1 of 1)	NA	3641744	0.734525	5.24303	0.10678
peak_3548	C3_06490W_A	Promoter (<=1kb)	NA	3642285	-0.31664	8.54059	0.10678
peak_1194	C1_10710C_A	Promoter (<=1kb)	NA	3644407	0.477035	6.20716	0.106784
peak_480	C1_04090C_A	5' UTR	NA	3644697	0.428685	6.1128	0.106784
peak_3101	C3_02750W_A	Promoter (<=1kb)	NA	3638411	-0.502121	5.86866	0.106784
peak_2193	C2_05130W_A	5' UTR	NA	3643458	-0.614586	5.35615	0.106784
peak_707	C1_06320W_A	Promoter (<=1kb)	NA	3648118	-0.558094	6.36562	0.106799
peak_527	C1_04510W_A	Promoter (<=1kb)	NA	3646147	1.40112	7.82745	0.106864
peak_6617	CR_03970C_A	Promoter (<=1kb)	SEC22	30515391	-0.312125	7.48834	0.106864
peak_2931	C3_00970W_A	Promoter (<=1kb)	tG(UCC)1	30515172	-0.317708	7.51214	0.106966
peak_2750	C2_10500W_A	Exon (C2_10500W_A/C2_10500W_A, exon 2 of 2)	tF(GAA)4	30515166	-0.353259	6.70915	0.106966
peak_4929	C5_04020C_A	Downstream (2-3kb)	FGR42	3647438	-0.755609	4.86298	0.107191
peak_6914	CR_06990W_A	Exon (CR_06990W_A/CR_06990W_A, exon 1 of 1)	NA	3645734	-0.587189	5.5044	0.107581
peak_6921	CR_07060C_A	Exon (CR_07060C_A/CR_07060C_A, exon 1 of 1)	CRZ2	3645725	-0.59876	5.51757	0.107581
peak_6002	C7_02860C_A	Promoter (<=1kb)	NA	3641397	0.445425	6.08762	0.107643
peak_6205	CR_00210W_A	Promoter (<=1kb)	ALK2	3639700	-0.301734	7.53506	0.107643
peak_5177	C6_00670W_A	Exon (C6_00670W_A/C6_00670W_A, exon 2 of 2)	CDC14	3647132	-0.518549	5.75236	0.107643
peak_1538	C1_13890C_A	Promoter (<=1kb)	tA(AGC)7	30515078	-0.404141	6.71395	0.107692
peak_1261	C1_11410C_A	Promoter (<=1kb)	NA	30515054	-0.585857	5.58363	0.107692
peak_1934	C2_02690W_A	Promoter (<=1kb)	SER2	3643006	-0.426319	6.23795	0.107759
peak_5526	C6_03930W_A	Exon (C6_03930W_A/C6_03930W_A, exon 1 of 1)	OPT8	3640266	-0.502744	5.70005	0.107765
peak_6919	CR_07050C_A	Promoter (<=1kb)	URA2	3645728	-0.298189	7.70853	0.107917
peak_1642	C1_14520W_A	5' UTR	NA	3643332	-0.398082	6.60003	0.107981
peak_3058	C3_02240C_A	Promoter (<=1kb)	GPA2	3636638	-0.804319	4.74325	0.108045
peak_2929	C3_00940W_A	Promoter (<=1kb)	NA	3639851	0.916126	4.67287	0.108414
[truncated: 5,859 more rows]
