# Supplementary material for: ATAC-Seq Identifies Chromatin Landscapes Linked to the Regulation of Oxidative Stress in the Human Fungal Pathogen Candida albicans
Source: J Fungi (Basel). 2020 Sep 21;6(3):182. doi: 10.3390/jof6030182 (PMC7559329; doi:10.3390/jof6030182)
Supplement: Supplementary file 1 [file jof-06-00182-s001.zip › TableS4.xlsx]

## Sheet: legend
Table S4. Merged ATAC-seq and RNA-seq result
geneID	gene id of the next gene downstream of the peak; from C. albicans assembly 22 (A22-s07-m01-r88)
peakID	peak id from MACS2 peak calling
annotation	genomic annotation from called peak
GeneName	gene name annotation from C. albicans assembly 22 (A22-s07-m01-r88)
EntrezID	gene id from the Entrez database
ATACseq_logFC	log2-fold change in nucleosome-free ATAC-seq peak signal in H2O2 vs YPD grown cells
ATACseq_FDR	false discovery rate ATAC-seq
RNAseq_logFC	log2-fold change in transcript abundance in H2O2 vs YPD grown cells
RNAseq_FDR	false discovery rate RNA-seq
Regulation_ATACseq	Regulation in the ATAC-seq data set (FDR < 0.05, logFC > 0 = up, FDR < 0.05, logFC < 0 = down, FDR > 0.05 = no change)
Regulation_RNAseq	Regulation in the RNA-seq data set (FDR < 0.05, logFC > 0 = up, FDR < 0.05, logFC < 0 = down, FDR > 0.05 = no change)
Common_regulation_ATACseq_RNAseq	Indicates whether ATAC-seq peaks are co-regulated with transcripts detected in the RNA-seq data set.

## Sheet: result
geneID	peakID	annotation	GeneName	EntrezID	ATACseq_logFC	ATACseq_FDR	RNAseq_logFC	RNAseq_FDR	Regulation_ATACseq	Regulation_RNAseq	Common_regulation_ATACseq_RNAseq
C1_12070C_A	peak_1347	Promoter (<=1kb)	NA	3642025	2.18472	0.0024205	3.778	0	up	up	same: up
C4_02540W_A	peak_4015	Promoter (1-2kb)	RGT1	3637920	2.10994	0.00265009	-0.509	0.154	up	no change	no: ATACseq up, RNAseq no change
C3_06180C_A	peak_3494	Promoter (<=1kb)	TSA1	3642269	2.0571	1.83e-05	4.16	0	up	up	same: up
C4_06780C_A	peak_4447	Promoter (<=1kb)	OYE32	3642919	1.9613	0.00287253	6.997	0	up	up	same: up
C4_06890W_A	peak_4461	Promoter (<=1kb)	ARR3	3642910	1.9284	0.0475136	6.887	0	up	up	same: up
C2_06720W_A	peak_2375	Promoter (<=1kb)	GRE2	3648026	1.91199	0.000469783	5.967	0	up	up	same: up
C1_07980C_A	peak_887	Promoter (<=1kb)	NA	3640696	1.82027	1.83e-05	3.663	0	up	up	same: up
C3_06330W_A	peak_3522	Promoter (<=1kb)	TSA1B	30515214	1.77275	1.83e-05	3.67	0	up	up	same: up
C2_07630C_A	peak_2453	Promoter (<=1kb)	NA	3645193	1.74802	0.000238872	3.284	0	up	up	same: up
C1_09120W_A	peak_1008	Distal Intergenic	IPT1	3634941	-0.597741	0.04985	-2.289	0	down	down	same: down
C5_00670C_A	peak_4600	Promoter (1-2kb)	HMS1	3641570	1.68149	1.83e-05	-0.864	0.043	up	down	no: ATACseq up, RNAseq down
C1_09180W_A	peak_1020	Promoter (1-2kb)	LYS143	3634894	1.66859	0.000521435	1.048	0	up	up	same: up
C6_01180C_A	peak_5244	Promoter (<=1kb)	EBP1	3644060	1.61288	0.000396897	7.654	0	up	up	same: up
CR_09830W_A	peak_7398	Promoter (<=1kb)	NA	3638986	1.6112	0.000838364	5.305	0	up	up	same: up
C1_07990C_A	peak_892	Promoter (<=1kb)	NA	3640697	1.60507	0.0103938	2.291	0	up	up	same: up
C1_13450W_A	peak_1474	Promoter (<=1kb)	HYR1	3636226	1.59428	0.00730828	3.018	0	up	up	same: up
C3_05570W_A	peak_3422	Promoter (<=1kb)	QDR2	3643661	1.59016	0.0144156	2.984	0	up	up	same: up
C1_07160C_A	peak_796	Promoter (<=1kb)	NA	30515020	1.58691	0.000217267	-1.192	0.007	up	down	no: ATACseq up, RNAseq down
C6_01070C_A	peak_5232	Promoter (1-2kb)	CIP1	3644018	1.58425	0.00333149	6.46	0	up	up	same: up
C7_00780W_A	peak_5783	Promoter (<=1kb)	NA	3637945	1.58045	0.0457784	-0.352	0.142	up	no change	no: ATACseq up, RNAseq no change
C4_06900W_A	peak_4463	Promoter (<=1kb)	GST1	3642909	1.55733	0.00701198	8.003	0	up	up	same: up
C4_01360W_A	peak_3900	Promoter (1-2kb)	PGA53	3635599	1.48668	0.0225351	-1.162	0	up	down	no: ATACseq up, RNAseq down
C1_09240C_A	peak_1030	Promoter (<=1kb)	NA	3634901	1.46239	0.000129013	1.728	0	up	up	same: up
C2_07580W_A	peak_2450	Promoter (<=1kb)	NA	3645216	1.45718	0.000426571	3.721	0	up	up	same: up
C1_07180W_A	peak_800	Promoter (<=1kb)	CCS1	3644476	1.44301	0.000633756	4.055	0	up	up	same: up
C7_00710W_A	peak_5771	Promoter (<=1kb)	RPS28B	30515349	1.43007	0.00026728	-1.661	0	up	down	no: ATACseq up, RNAseq down
C1_07990C_A	peak_893	Promoter (<=1kb)	NA	3640697	1.42944	0.00774299	2.291	0	up	up	same: up
C1_09210C_A	peak_1024	5' UTR	NA	3634897	-0.665579	0.221369	1.837	0	no change	up	no: ATACseq no change, RNAseq up
C6_01070C_A	peak_5231	Promoter (<=1kb)	CIP1	3644018	1.41665	0.0109851	6.46	0	up	up	same: up
C1_06610C_A	peak_738	Promoter (<=1kb)	HAK1	3639546	1.41425	0.0355577	2.568	0	up	up	same: up
C1_04510W_A	peak_527	Promoter (<=1kb)	NA	3646147	1.40112	0.106864	-0.992	0	no change	down	no: ATACseq no change, RNAseq down
C1_13450W_A	peak_1473	Promoter (1-2kb)	HYR1	3636226	1.38755	4.6e-05	3.018	0	up	up	same: up
C7_01440W_A	peak_5850	Promoter (<=1kb)	NA	3636960	1.3645	0.0495475	0.205	0.499	up	no change	no: ATACseq up, RNAseq no change
C3_06180C_A	peak_3495	Promoter (<=1kb)	TSA1	3642269	1.35779	0.0313185	4.16	0	up	up	same: up
C1_11700C_A	peak_1300	Promoter (<=1kb)	MRF1	3645321	1.35649	1.83e-05	6.243	0	up	up	same: up
CR_07530C_A	peak_6978	Promoter (1-2kb)	ECM22	3648000	1.35376	0.000633756	0.815	0	up	up	same: up
C1_09260C_A	peak_1032	Exon (C1_09250W_A/C1_09250W_A, exon 1 of 1)	PTC1	3634827	1.04005	0.00157873	0.554	0.027	up	up	same: up
C1_08950W_A	peak_985	Promoter (<=1kb)	PFK26	3634912	1.31442	0.012205	1.146	0	up	up	same: up
C5_02710W_A	peak_4798	Promoter (<=1kb)	TRR1	3637778	1.3022	1.83e-05	4.95	0	up	up	same: up
C4_02520C_A	peak_4011	Promoter (<=1kb)	NA	3637863	1.29547	0.00367161	1.885	0	up	up	same: up
C4_01350W_A	peak_3898	Promoter (<=1kb)	NA	NA	1.29242	0.00049049	5.476	0	up	up	same: up
C1_05160C_A	peak_602	Promoter (<=1kb)	NA	3642468	1.28387	1.83e-05	3.383	0	up	up	same: up
C1_02780W_A	peak_337	Promoter (<=1kb)	NA	3636871	1.28295	0.0178555	1.255	0	up	up	same: up
CR_02560C_A	peak_6442	Promoter (<=1kb)	ASG1	3647687	1.27775	4.01e-05	-0.565	0.071	up	no change	no: ATACseq up, RNAseq no change
C1_00780C_A	peak_104	Distal Intergenic	HGC1	3639349	-0.149852	0.739712	0.942	0.001	no change	up	no: ATACseq no change, RNAseq up
CR_06460W_A	peak_6868	Promoter (<=1kb)	GST3	3645278	1.26659	0.000728679	4.658	0	up	up	same: up
C1_08800W_A	peak_973	Promoter (<=1kb)	NA	3634791	1.26483	0.11625	0.844	0	no change	up	no: ATACseq no change, RNAseq up
C6_01510W_A	peak_5269	Promoter (<=1kb)	OYE23	3641618	1.25522	1.83e-05	6.076	0	up	up	same: up
C7_01780W_A	peak_5889	Promoter (<=1kb)	LPI9	3637060	1.25041	0.00154381	1.787	0	up	up	same: up
C3_02610C_A	peak_3088	Promoter (<=1kb)	GLX3	3638325	1.24629	0.0404775	4.645	0	up	up	same: up
C4_01360W_A	peak_3901	Promoter (1-2kb)	PGA53	3635599	1.24402	0.0135344	-1.162	0	up	down	no: ATACseq up, RNAseq down
C2_09890W_A	peak_2682	Promoter (<=1kb)	SMM1	3643778	1.24308	0.000612092	-3.319	0	up	down	no: ATACseq up, RNAseq down
C1_02840W_A	peak_345	Promoter (<=1kb)	PDE2	3636877	1.23594	5.32e-05	0.362	0.199	up	no change	no: ATACseq up, RNAseq no change
C6_02100W_A	peak_5336	Promoter (<=1kb)	NA	3647554	1.2349	0.0387646	6.456	0	up	up	same: up
C3_01950C_A	peak_3038	Promoter (<=1kb)	NA	3636599	1.2292	5.33e-05	2.03	0	up	up	same: up
C1_00780C_A	peak_105	Distal Intergenic	HGC1	3639349	-0.397053	0.367582	0.942	0.001	no change	up	no: ATACseq no change, RNAseq up
C7_01690W_A	peak_5879	Promoter (<=1kb)	NA	3636980	1.22696	0.000612092	1.383	0	up	up	same: up
C3_02480C_A	peak_3079	Promoter (<=1kb)	CCP1	3638350	1.20592	1.83e-05	4.462	0	up	up	same: up
C5_00390C_A	peak_4560	Promoter (<=1kb)	NA	3641552	1.19907	0.000238703	2.282	0	up	up	same: up
C4_06900W_A	peak_4462	Promoter (<=1kb)	GST1	3642909	1.19253	0.00382648	8.003	0	up	up	same: up
C4_01360W_A	peak_3902	Promoter (<=1kb)	PGA53	3635599	1.18824	0.207321	-1.162	0	no change	down	no: ATACseq no change, RNAseq down
C1_09530W_A	peak_1055	Distal Intergenic	RAM2	3634767	-0.247561	0.209982	0.958	0	no change	up	no: ATACseq no change, RNAseq up
C1_09530W_A	peak_1056	Distal Intergenic	RAM2	3634767	0.169135	0.675838	0.958	0	no change	up	no: ATACseq no change, RNAseq up
C1_09530W_A	peak_1057	Distal Intergenic	RAM2	3634767	-0.899756	0.0015859	0.958	0	down	up	no: ATACseq down, RNAseq up
C1_09540W_A	peak_1058	Distal Intergenic	NA	3634885	-0.360006	0.072765	0.679	0.016	no change	up	no: ATACseq no change, RNAseq up
C1_09540W_A	peak_1059	Distal Intergenic	NA	3634885	-0.722482	0.165235	0.679	0.016	no change	up	no: ATACseq no change, RNAseq up
C1_00790W_A	peak_106	Distal Intergenic	NA	3639348	-0.73038	0.0553733	-0.225	0.576	no change	no change	same: no change
C1_09540W_A	peak_1060	Distal Intergenic	NA	3634885	-0.772547	0.00655848	0.679	0.016	down	up	no: ATACseq down, RNAseq up
C7_01440W_A	peak_5849	Promoter (<=1kb)	NA	3636960	1.1812	0.0159099	0.205	0.499	up	no change	no: ATACseq up, RNAseq no change
C1_09550W_A	peak_1062	Downstream (<1kb)	NA	3634886	-0.474834	0.0425656	0.417	0.6	down	no change	no: ATACseq down, RNAseq no change
C1_09560C_A	peak_1063	Downstream (<1kb)	NA	30515034	-0.185349	0.316789	0.262	0.755	no change	no change	same: no change
CR_07060C_A	peak_6924	Promoter (<=1kb)	CRZ2	3645725	1.18029	0.00646335	-0.626	0.137	up	no change	no: ATACseq up, RNAseq no change
C2_08310W_A	peak_2518	Promoter (<=1kb)	TIM22	3648168	1.17199	1.83e-05	-2.034	0	up	down	no: ATACseq up, RNAseq down
C2_07280W_A	peak_2426	Promoter (<=1kb)	NA	3643475	1.16746	0.0159099	6.358	0	up	up	same: up
C5_00390C_A	peak_4561	Promoter (<=1kb)	NA	3641552	1.15898	6.26e-05	2.282	0	up	up	same: up
C1_10040W_A	peak_1108	Promoter (<=1kb)	ERO1	3634810	1.15829	0.000319923	1.703	0	up	up	same: up
CR_03250C_A	peak_6538	Promoter (<=1kb)	NA	3645102	1.15635	0.000424988	0.933	0.008	up	up	same: up
C1_00790W_A	peak_107	Distal Intergenic	NA	3639348	-0.723886	0.00459297	-0.225	0.576	down	no change	no: ATACseq down, RNAseq no change
C1_11660W_A	peak_1290	Promoter (<=1kb)	GAD1	3645339	1.15077	0.000238872	1.88	0	up	up	same: up
C2_09880C_A	peak_2681	Promoter (<=1kb)	NA	3643779	1.13958	4.44e-05	-0.002	1	up	no change	no: ATACseq up, RNAseq no change
C1_10060C_A	peak_1111	Promoter (<=1kb)	NA	3634812	1.13639	0.000553506	2.659	0	up	up	same: up
C1_13850C_A	peak_1522	Promoter (<=1kb)	DAL7	3636130	1.13629	0.0242972	0.564	0.428	up	no change	no: ATACseq up, RNAseq no change
C2_03310C_A	peak_2014	Promoter (<=1kb)	VPS20	3637427	1.13606	0.000388027	2.736	0	up	up	same: up
C1_11580W_A	peak_1285	Promoter (<=1kb)	NA	3645330	1.13084	0.000238703	3.543	0	up	up	same: up
C1_03820W_A	peak_451	Promoter (<=1kb)	PDR16	3644679	1.126	0.0104048	3.702	0	up	up	same: up
C1_07240W_A	peak_809	Promoter (<=1kb)	YPD1	3644458	1.12028	2.04e-05	2.042	0	up	up	same: up
C2_05060C_A	peak_2188	Promoter (<=1kb)	NA	3643451	1.11964	0.00425646	6.556	0	up	up	same: up
C1_10310W_A	peak_1146	Promoter (<=1kb)	NA	3634906	1.11932	1.83e-05	7.913	0	up	up	same: up
C1_00790W_A	peak_108	Distal Intergenic	NA	3639348	-0.432942	0.129412	-0.225	0.576	no change	no change	same: no change
C1_06810W_A	peak_751	Promoter (<=1kb)	CAT1	3639495	1.11594	4.6e-05	5.18	0	up	up	same: up
C1_09750W_A	peak_1081	Exon (C1_09750W_A/C1_09750W_A, exon 1 of 1)	NA	3634822	-0.282747	0.532739	-0.744	0.008	no change	down	no: ATACseq no change, RNAseq down
C1_09150W_A	peak_1014	Promoter (<=1kb)	AOX2	3634945	1.11304	0.000140771	2.887	0	up	up	same: up
C1_12910W_A	peak_1414	Promoter (1-2kb)	NA	30515066	1.11178	0.00140433	2.87	0	up	up	same: up
C7_00770W_A	peak_5782	Promoter (<=1kb)	NA	3637959	1.1108	3.53e-05	6.34	0	up	up	same: up
C1_10280C_A	peak_1141	Promoter (<=1kb)	NA	3634902	1.10741	0.0029203	3.509	0	up	up	same: up
C1_05540C_A	peak_633	Promoter (<=1kb)	NA	3642503	1.09957	0.000215179	1.636	0	up	up	same: up
C3_00940W_A	peak_2928	Promoter (<=1kb)	NA	3639851	1.09161	0.000217267	3.196	0	up	up	same: up
C1_04330W_A	peak_506	Promoter (<=1kb)	RPN4	3644684	1.08672	1.83e-05	2.747	0	up	up	same: up
C5_00670C_A	peak_4599	Promoter (<=1kb)	HMS1	3641570	1.08391	0.0294615	-0.864	0.043	up	down	no: ATACseq up, RNAseq down
C1_00490C_A	peak_71	Promoter (<=1kb)	TTR1	3639313	1.08153	0.000160278	4.333	0	up	up	same: up
C1_09780C_A	peak_1083	Promoter (<=1kb)	NA	3634842	1.08013	0.000909781	1.48	0	up	up	same: up
CR_04520W_A	peak_6654	Promoter (<=1kb)	MIM1	30515394	1.07557	0.000279605	0.42	0.1	up	no change	no: ATACseq up, RNAseq no change
C1_09880C_A	peak_1092	5' UTR	BUD31	3634796	-0.73588	0.0233012	-1.77	0	down	down	same: down
C1_04500W_A	peak_525	Promoter (<=1kb)	ICL1	3646146	1.07465	9.37e-05	8.234	0	up	up	same: up
C1_12360C_A	peak_1367	Promoter (<=1kb)	RIB3	3642062	1.07111	0.000217267	2.107	0	up	up	same: up
C1_06820W_A	peak_752	Promoter (<=1kb)	NA	3639493	1.06613	0.0377608	-2.581	0	up	down	no: ATACseq up, RNAseq down
C4_03890W_A	peak_4146	Promoter (1-2kb)	PTP2	3647858	1.06446	0.000388027	3.491	0	up	up	same: up
C6_02340W_A	peak_5359	Promoter (1-2kb)	HRR25	3645878	1.06281	0.000731579	-1.143	0	up	down	no: ATACseq up, RNAseq down
CR_02650C_A	peak_6469	Promoter (<=1kb)	DRE2	3642571	1.06152	4.6e-05	3.181	0	up	up	same: up
C3_02390W_A	peak_3073	Promoter (<=1kb)	NA	3636615	1.05865	0.0160319	1.745	0	up	up	same: up
CR_06330C_A	peak_6849	Promoter (<=1kb)	NA	3644846	1.05588	0.00733977	-2.999	0	up	down	no: ATACseq up, RNAseq down
C1_00790W_A	peak_110	Downstream (2-3kb)	NA	3639348	-0.311819	0.476709	-0.225	0.576	no change	no change	same: no change
C1_01140C_A	peak_159	Promoter (<=1kb)	NA	3640202	1.05379	1.83e-05	1.995	0	up	up	same: up
C3_07340W_A	peak_3655	Promoter (<=1kb)	GCY1	3638477	1.05336	9.37e-05	3.315	0	up	up	same: up
C4_03890W_A	peak_4147	Promoter (<=1kb)	PTP2	3647858	1.04882	0.000388027	3.491	0	up	up	same: up
CR_05730C_A	peak_6777	Promoter (<=1kb)	NA	3646698	1.04795	0.000267461	-1.059	0	up	down	no: ATACseq up, RNAseq down
C2_07490W_A	peak_2443	Promoter (<=1kb)	HEM15	3645211	1.04553	0.000643407	1.676	0	up	up	same: up
C3_04480C_A	peak_3266	Promoter (<=1kb)	RAS2	3635211	1.04468	0.000217267	3.785	0	up	up	same: up
C1_10030W_A	peak_1106	5' UTR	DBP3	3634868	-0.0231716	0.95536	-3.007	0	no change	down	no: ATACseq no change, RNAseq down
C1_02840W_A	peak_346	Promoter (<=1kb)	PDE2	3636877	1.04141	0.00045137	0.362	0.199	up	no change	no: ATACseq up, RNAseq no change
C7_01790C_A	peak_5892	Promoter (<=1kb)	RPL5	3637057	1.0408	0.0492733	-1.885	0	up	down	no: ATACseq up, RNAseq down
C5_00570W_A	peak_4588	Promoter (<=1kb)	NA	3641589	1.03407	0.000686968	0.905	0	up	up	same: up
C1_00800C_A	peak_111	Downstream (<1kb)	ERG2	3639347	-0.682564	0.0045599	-3.908	0	down	down	same: down
C4_06670W_A	peak_4433	Promoter (<=1kb)	NA	3642951	1.02932	0.0488643	-0.214	0.421	up	no change	no: ATACseq up, RNAseq no change
C3_00550C_A	peak_2868	Promoter (<=1kb)	HRK1	3640586	1.02895	0.0333035	0.912	0	up	up	same: up
C5_00270W_A	peak_4536	Promoter (<=1kb)	PGA14	3641560	1.02664	0.000202708	-0.454	0.079	up	no change	no: ATACseq up, RNAseq no change
C2_10060C_A	peak_2707	Promoter (<=1kb)	NA	3643948	1.01088	0.000401099	1.554	0	up	up	same: up
C2_06640C_A	peak_2357	Promoter (<=1kb)	VAS1	3648340	1.00918	0.0240212	-1.26	0	up	down	no: ATACseq up, RNAseq down
C2_09880C_A	peak_2680	Promoter (<=1kb)	NA	3643779	0.996149	0.00910743	-0.002	1	up	no change	no: ATACseq up, RNAseq no change
C5_01520C_A	peak_4687	Promoter (<=1kb)	GLR1	3647061	0.995788	0.000202708	3.992	0	up	up	same: up
C1_10140C_A	peak_1117	Distal Intergenic	NA	3634780	-0.28154	0.16959	0.007	0.997	no change	no change	same: no change
C1_10150W_A	peak_1118	Distal Intergenic	WOR1	3634781	-0.540128	0.343175	0.272	0.535	no change	no change	same: no change
C1_10150W_A	peak_1119	Distal Intergenic	WOR1	3634781	-0.187173	0.553881	0.272	0.535	no change	no change	same: no change
CR_07450C_A	peak_6968	Promoter (<=1kb)	MNL1	3646050	0.99506	0.0402906	0.194	0.569	up	no change	no: ATACseq up, RNAseq no change
C1_10150W_A	peak_1120	Distal Intergenic	WOR1	3634781	-0.97619	0.0541041	0.272	0.535	no change	no change	same: no change
CR_02650C_A	peak_6470	Promoter (<=1kb)	DRE2	3642571	0.991383	0.000421395	3.181	0	up	up	same: up
C1_10160W_A	peak_1122	Distal Intergenic	MIR1	3634782	-0.226949	0.442254	-1.232	0	no change	down	no: ATACseq no change, RNAseq down
C7_03230C_A	peak_6028	Promoter (<=1kb)	NA	3641369	0.989273	0.000217267	2.022	0	up	up	same: up
C2_03110W_A	peak_1985	Promoter (<=1kb)	NA	3642995	0.98737	0.000274933	3.571	0	up	up	same: up
C1_12460C_A	peak_1378	Promoter (<=1kb)	NA	NA	0.987139	0.00372447	2.013	0	up	up	same: up
C1_10280C_A	peak_1140	Promoter (<=1kb)	NA	3634902	0.984923	0.00049049	3.509	0	up	up	same: up
C1_03510C_A	peak_420	Promoter (<=1kb)	NA	3636916	0.984857	0.000238872	3.641	0	up	up	same: up
C3_03410C_A	peak_3158	Promoter (<=1kb)	NA	3638353	0.984582	0.00014573	0.667	0.016	up	up	same: up
CR_10350C_A	peak_7474	Promoter (<=1kb)	TRX1	3638950	0.98055	0.0840598	3.363	0	no change	up	no: ATACseq no change, RNAseq up
C7_01510W_A	peak_5856	Promoter (<=1kb)	NA	3637049	0.959765	0.00195536	-1.758	0	up	down	no: ATACseq up, RNAseq down
CR_07530C_A	peak_6977	Promoter (<=1kb)	ECM22	3648000	0.958779	0.000230185	0.815	0	up	up	same: up
CR_03010C_A	peak_6519	Promoter (<=1kb)	ERV1	30515385	0.95745	0.00552591	3.342	0	up	up	same: up
C3_02220W_A	peak_3054	Promoter (<=1kb)	CAP1	3636640	0.956993	0.00056692	2.791	0	up	up	same: up
C1_04480C_A	peak_523	Promoter (<=1kb)	TUS1	3646144	0.9555	0.00035863	1.58	0	up	up	same: up
C6_00850W_A	peak_5206	Promoter (<=1kb)	NA	3644010	0.952171	0.000347715	5.368	0	up	up	same: up
C4_02530W_A	peak_4012	Promoter (<=1kb)	ARG83	3637862	0.950476	0.000726732	0.145	0.691	up	no change	no: ATACseq up, RNAseq no change
C5_03130W_A	peak_4833	Promoter (1-2kb)	SUT1	3637706	0.947441	0.00287253	-4.224	0	up	down	no: ATACseq up, RNAseq down
C6_00290W_A	peak_5125	Promoter (<=1kb)	NA	3646069	0.945122	0.000129013	0.445	0.076	up	no change	no: ATACseq up, RNAseq no change
C1_12070C_A	peak_1346	Promoter (<=1kb)	NA	3642025	0.93965	0.0550978	3.778	0	no change	up	no: ATACseq no change, RNAseq up
C7_00350C_A	peak_5731	Promoter (<=1kb)	NA	3638039	0.939022	0.000238872	6.896	0	up	up	same: up
C2_10240W_A	peak_2725	Promoter (<=1kb)	GPD1	3643924	0.937986	0.000267461	-0.574	0.064	up	no change	no: ATACseq up, RNAseq no change
C6_01410C_A	peak_5257	Promoter (<=1kb)	OYE2	3641603	0.936684	0.00609241	6.119	0	up	up	same: up
C2_07630C_A	peak_2454	Promoter (<=1kb)	NA	3645193	0.932828	0.000202708	3.284	0	up	up	same: up
C2_00250W_A	peak_1689	Promoter (<=1kb)	STF2	30515083	0.930116	0.000322671	5.492	0	up	up	same: up
C1_02810W_A	peak_340	Promoter (<=1kb)	RAD16	3636874	0.92931	0.00229781	3.871	0	up	up	same: up
CR_02880W_A	peak_6503	Promoter (<=1kb)	NA	3642584	0.927475	0.00724187	1.639	0	up	up	same: up
C6_03320W_A	peak_5443	Promoter (<=1kb)	NA	3639198	0.926994	0.00033357	2.685	0	up	up	same: up
C2_08200W_A	peak_2506	Promoter (<=1kb)	NA	3648342	0.926183	0.000239888	5.332	0	up	up	same: up
C1_09700W_A	peak_1078	Promoter (<=1kb)	NA	3634876	0.921404	0.0401054	-1.617	0.021	up	down	no: ATACseq up, RNAseq down
C1_10350C_A	peak_1149	Exon (C1_10350C_A/C1_10350C_A, exon 1 of 1)	NA	3634835	0.0997437	0.808821	0.342	0.184	no change	no change	same: no change
C3_00940W_A	peak_2929	Promoter (<=1kb)	NA	3639851	0.916126	0.108414	3.196	0	no change	up	no: ATACseq no change, RNAseq up
C1_02700C_A	peak_327	Promoter (<=1kb)	NA	30514972	0.915318	0.000220848	2.251	0	up	up	same: up
C1_02040C_A	peak_254	Promoter (<=1kb)	NA	3644586	0.915011	0.000396856	3.256	0	up	up	same: up
C2_07640W_A	peak_2455	Promoter (<=1kb)	NA	3645192	0.913208	0.000632021	2.867	0	up	up	same: up
CR_03730C_A	peak_6578	Promoter (<=1kb)	NA	3643226	0.911597	0.000245837	1.686	0	up	up	same: up
C1_10350C_A	peak_1154	Downstream (<1kb)	NA	3634835	-0.104791	0.679715	0.342	0.184	no change	no change	same: no change
C1_10360C_A	peak_1155	Downstream (<1kb)	NA	3634836	0.622289	0.0427443	3.045	0	up	up	same: up
C1_10360C_A	peak_1156	Downstream (<1kb)	NA	3634836	1.20809	0.00925789	3.045	0	up	up	same: up
C1_10360C_A	peak_1157	Exon (C1_10360C_A/C1_10360C_A, exon 1 of 1)	NA	3634836	0.468194	0.3924	3.045	0	no change	up	no: ATACseq no change, RNAseq up
C1_02630C_A	peak_323	Promoter (<=1kb)	EXG2	3636816	0.903844	0.00275921	1.656	0	up	up	same: up
C3_03870C_A	peak_3203	Promoter (1-2kb)	SAP9	3645625	0.900041	0.00178858	1.1	0	up	up	same: up
CR_06040W_A	peak_6821	Promoter (<=1kb)	NA	3644836	0.899416	0.000123384	0.079	0.766	up	no change	no: ATACseq up, RNAseq no change
CR_05380C_A	peak_6736	Promoter (<=1kb)	YCP4	3648032	0.895572	0.0072789	2.293	0	up	up	same: up
C2_07130C_A	peak_2413	Promoter (<=1kb)	RCK2	3643507	0.894605	0.0215384	0.123	0.654	up	no change	no: ATACseq up, RNAseq no change
C1_07990C_A	peak_894	Promoter (1-2kb)	NA	3640697	0.894064	0.00076867	2.291	0	up	up	same: up
C1_06610C_A	peak_737	Promoter (<=1kb)	HAK1	3639546	0.891078	0.065114	2.568	0	no change	up	no: ATACseq no change, RNAseq up
C4_01300W_A	peak_3892	Promoter (1-2kb)	NA	3635605	0.887915	0.000238703	-0.89	0.005	up	down	no: ATACseq up, RNAseq down
C1_07980C_A	peak_888	Promoter (1-2kb)	NA	3640696	0.886215	0.0234792	3.663	0	up	up	same: up
C7_01430C_A	peak_5847	Promoter (<=1kb)	NA	3636961	0.885207	0.00014573	3.891	0	up	up	same: up
C5_02520W_A	peak_4781	Promoter (<=1kb)	NA	3637768	0.882514	0.000256573	1.303	0	up	up	same: up
CR_02990C_A	peak_6516	Promoter (<=1kb)	RIB1	3642607	0.881668	0.000454679	2.327	0	up	up	same: up
CR_06650C_A	peak_6884	Promoter (<=1kb)	NA	3646620	0.872792	0.000260236	1.993	0	up	up	same: up
C5_03020W_A	peak_4822	Promoter (1-2kb)	CCC2	3637821	0.8695	0.0415687	-0.333	0.237	up	no change	no: ATACseq up, RNAseq no change
C1_08940C_A	peak_982	Promoter (1-2kb)	MSN4	3634911	0.869487	0.00195536	2.766	0	up	up	same: up
C2_07570W_A	peak_2449	Promoter (<=1kb)	RNR22	3645217	0.869247	0.00033076	5.175	0	up	up	same: up
C2_02230C_A	peak_1894	Promoter (1-2kb)	NA	3635775	0.86808	0.0626416	-0.097	0.936	no change	no change	same: no change
C1_07160C_A	peak_795	Promoter (<=1kb)	NA	30515020	0.865103	0.00045137	-1.192	0.007	up	down	no: ATACseq up, RNAseq down
C3_06560W_A	peak_3556	Promoter (<=1kb)	NA	3642276	0.864839	0.00712594	0.28	0.252	up	no change	no: ATACseq up, RNAseq no change
C3_00670C_A	peak_2887	Promoter (<=1kb)	FKH2	3640536	0.86481	0.000401099	-0.593	0.014	up	down	no: ATACseq up, RNAseq down
C5_00680W_A	peak_4601	Promoter (<=1kb)	RMT2	3641569	0.864357	0.00033076	-1.242	0	up	down	no: ATACseq up, RNAseq down
C2_04410W_A	peak_2127	Promoter (<=1kb)	NA	3645455	0.862031	0.040525	1.405	0	up	up	same: up
C3_04520C_A	peak_3274	Promoter (<=1kb)	ADE2	3635259	0.861606	0.000922773	-1.646	0	up	down	no: ATACseq up, RNAseq down
C4_02990C_A	peak_4062	Promoter (<=1kb)	GST2	3637937	0.859245	0.00432836	6.344	0	up	up	same: up
C1_13190W_A	peak_1447	Promoter (<=1kb)	NA	3636163	0.857497	0.0170713	1.923	0	up	up	same: up
C1_10590W_A	peak_1181	Downstream (1-2kb)	NA	30515042	-1.33809	0.00967929	-0.726	0.25	down	no change	no: ATACseq down, RNAseq no change
CR_03710C_A	peak_6573	Promoter (<=1kb)	NA	3643224	0.847111	0.000731579	5.512	0	up	up	same: up
CR_05170C_A	peak_6708	Promoter (<=1kb)	FDH1	3646398	0.845627	0.00248248	2.307	0	up	up	same: up
C2_00600C_A	peak_1722	Promoter (<=1kb)	NA	3638850	0.838349	0.00235442	2.283	0	up	up	same: up
C1_05140W_A	peak_592	Promoter (<=1kb)	BRG1	3647664	0.834851	0.000202708	2.498	0	up	up	same: up
CR_09780C_A	peak_7391	Promoter (<=1kb)	IFA14	3639012	0.834461	0.00533333	1.618	0	up	up	same: up
CR_02880W_A	peak_6502	Promoter (<=1kb)	NA	3642584	0.83403	0.00110467	1.639	0	up	up	same: up
C3_07280C_A	peak_3644	Promoter (<=1kb)	NA	3638431	0.833316	0.000720641	1.638	0	up	up	same: up
C3_01970C_A	peak_3041	Promoter (<=1kb)	NA	3636597	0.827121	0.00880472	-0.684	0.242	up	no change	no: ATACseq up, RNAseq no change
C1_02840W_A	peak_347	Promoter (<=1kb)	PDE2	3636877	0.826416	0.00131374	0.362	0.199	up	no change	no: ATACseq up, RNAseq no change
C4_03380C_A	peak_4095	Promoter (<=1kb)	DAO2	3646797	0.825823	0.00230353	0.51	0.032	up	up	same: up
C1_07230W_A	peak_808	Promoter (<=1kb)	PHO15	3644459	0.824935	0.000690298	2.887	0	up	up	same: up
C3_03230C_A	peak_3137	Promoter (<=1kb)	NA	3638316	0.824703	0.000894877	2.597	0	up	up	same: up
C1_08070W_A	peak_902	Promoter (<=1kb)	CDR4	3640711	0.824437	0.000731579	2.822	0	up	up	same: up
C1_10740C_A	peak_1196	Exon (C1_10740C_A/C1_10740C_A, exon 1 of 1)	ASR1	3644402	-0.567681	0.0445217	4.632	0	down	up	no: ATACseq down, RNAseq up
C1_11860W_A	peak_1320	Promoter (<=1kb)	NA	3642009	0.823464	0.000633756	-1.915	0	up	down	no: ATACseq up, RNAseq down
C1_12250C_A	peak_1359	Promoter (<=1kb)	NA	3642022	0.823463	0.00386493	-0.601	0.01	up	down	no: ATACseq up, RNAseq down
CR_03120W_A	peak_6528	Promoter (<=1kb)	NA	3645123	0.818941	0.0031125	3.533	0	up	up	same: up
C1_04500W_A	peak_526	Promoter (<=1kb)	ICL1	3646146	0.818109	0.000953049	8.234	0	up	up	same: up
C1_10050W_A	peak_1109	Promoter (<=1kb)	NA	3634811	0.818061	0.0282131	2.788	0	up	up	same: up
C1_10180C_A	peak_1128	Promoter (<=1kb)	ECM21	3634784	0.816639	0.00378681	1.104	0	up	up	same: up
CR_07740W_A	peak_7002	Promoter (<=1kb)	NA	30515430	0.816239	0.00157873	5.65	0	up	up	same: up
C1_10800C_A	peak_1202	Exon (C1_10790W_A/C1_10790W_A, exon 1 of 1)	ALP1	3644437	0.689011	0.0512882	1.005	0	no change	up	no: ATACseq no change, RNAseq up
C1_10800C_A	peak_1203	Downstream (<1kb)	ALP1	3644437	1.17262	0.00226996	1.005	0	up	up	same: up
C3_00490W_A	peak_2862	Promoter (<=1kb)	ESA1	3640518	0.816162	0.00285798	0.797	0	up	up	same: up
C1_10810W_A	peak_1205	Exon (C1_10810W_A/C1_10810W_A, exon 1 of 1)	NA	3644436	0.792815	0.0792777	0.446	0.183	no change	no change	same: no change
C1_10830W_A	peak_1206	Promoter (<=1kb)	BIG1	3644434	0.812427	0.10678	0.058	0.863	no change	no change	same: no change
C1_10830W_A	peak_1207	Exon (C1_10840C_A/C1_10840C_A, exon 1 of 1)	BIG1	3644434	0.252312	0.569849	0.058	0.863	no change	no change	same: no change
C4_02000C_A	peak_3956	Promoter (<=1kb)	RGA2	3635661	0.811764	0.000687409	0.849	0.001	up	up	same: up
C7_01390W_A	peak_5841	Promoter (<=1kb)	NA	3645892	0.806329	0.0154674	-2.282	0	up	down	no: ATACseq up, RNAseq down
C1_10860C_A	peak_1212	5' UTR	ADA2	3644450	0.516093	0.160395	-0.293	0.225	no change	no change	same: no change
C5_01070C_A	peak_4635	Promoter (1-2kb)	NA	3642627	0.805913	0.0294269	-3.467	0	up	down	no: ATACseq up, RNAseq down
CR_02930W_A	peak_6509	Promoter (<=1kb)	NA	3642588	0.804554	0.100333	-0.295	0.543	no change	no change	same: no change
C1_10890C_A	peak_1215	Exon (C1_10890C_A/C1_10890C_A, exon 1 of 1)	NA	3644447	-0.457182	0.285054	-0.999	0	no change	down	no: ATACseq no change, RNAseq down
C1_06660W_A	peak_741	Promoter (<=1kb)	NA	3639542	0.804186	0.000421164	1.743	0	up	up	same: up
C1_10930C_A	peak_1217	Exon (C1_10930C_A/C1_10930C_A, exon 1 of 1)	UBA4	3644432	-0.279099	0.459907	-0.436	0.076	no change	no change	same: no change
C2_07900W_A	peak_2476	Promoter (1-2kb)	GDH2	3642295	0.796912	0.0153869	1.587	0	up	up	same: up
C1_08350C_A	peak_934	Promoter (<=1kb)	NA	30515030	0.794076	0.000251508	1.886	0	up	up	same: up
C1_00880W_A	peak_122	Exon (C1_00880W_A/C1_00880W_A, exon 1 of 1)	NA	3639355	-0.125295	0.752109	-2.213	0	no change	down	no: ATACseq no change, RNAseq down
C1_08970W_A	peak_988	Promoter (<=1kb)	NA	30515033	0.787871	0.0236706	0.416	0.534	up	no change	no: ATACseq up, RNAseq no change
C6_01360W_A	peak_5250	Promoter (<=1kb)	NA	3641608	0.785914	0.00035863	2.862	0	up	up	same: up
C7_01720W_A	peak_5882	Promoter (<=1kb)	NA	3637011	0.785045	0.0207642	-0.895	0	up	down	no: ATACseq up, RNAseq down
C6_00110C_A	peak_5097	Promoter (<=1kb)	NA	3647896	0.782665	0.0225063	-1.336	0.003	up	down	no: ATACseq up, RNAseq down
C1_11040W_A	peak_1224	Exon (C1_11040W_A/C1_11040W_A, exon 1 of 1)	RPL29	30515048	-0.795282	0.0415687	-2.174	0	down	down	same: down
C1_11050W_A	peak_1225	Exon (C1_11050W_A/C1_11050W_A, exon 2 of 2)	NA	3644418	-0.512416	0.150777	-4.024	0	no change	down	no: ATACseq no change, RNAseq down
C1_11060C_A	peak_1226	Exon (C1_11060C_A/C1_11060C_A, exon 2 of 2)	RPL2	30515049	-0.60043	0.0267392	-1.913	0	down	down	same: down
CR_09070C_A	peak_7300	Promoter (1-2kb)	NA	3641926	0.775534	0.120324	0.043	0.938	no change	no change	same: no change
C7_00920C_A	peak_5800	Promoter (<=1kb)	NA	3637957	0.769416	0.0454116	-0.055	0.875	up	no change	no: ATACseq up, RNAseq no change
C7_03350C_A	peak_6049	Promoter (<=1kb)	NA	3646722	0.768536	0.00459297	4.43	0	up	up	same: up
C6_00800C_A	peak_5188	Promoter (<=1kb)	NA	3647069	0.768239	0.000396856	1.916	0	up	up	same: up
C1_11080W_A	peak_1230	Exon (C1_11090C_A/C1_11090C_A, exon 1 of 1)	NA	3644416	0.185808	0.493689	0.773	0.001	no change	up	no: ATACseq no change, RNAseq up
C5_02720W_A	peak_4800	Promoter (<=1kb)	PEP12	3637737	0.766223	0.00120135	0.691	0.008	up	up	same: up
CR_03000C_A	peak_6518	Promoter (<=1kb)	NA	3642597	0.764225	0.108414	1.9	0	no change	up	no: ATACseq no change, RNAseq up
CR_06000W_A	peak_6814	Promoter (1-2kb)	SOK1	3642495	0.763532	0.000239888	1.023	0	up	up	same: up
C3_05310W_A	peak_3387	Promoter (<=1kb)	USO6	3643647	0.763384	0.139969	0.252	0.398	no change	no change	same: no change
C2_05380W_A	peak_2219	Promoter (<=1kb)	NA	3643432	0.762378	0.0872874	-2.378	0	no change	down	no: ATACseq no change, RNAseq down
C6_01520W_A	peak_5270	Promoter (<=1kb)	NA	3641617	0.761482	0.00248248	-1.925	0	up	down	no: ATACseq up, RNAseq down
C1_11140W_A	peak_1237	Exon (C1_11140W_A/C1_11140W_A, exon 1 of 1)	NA	3644410	-0.353483	0.297646	0.581	0.006	no change	up	no: ATACseq no change, RNAseq up
C1_11150W_A	peak_1238	Exon (C1_11150W_A/C1_11150W_A, exon 1 of 1)	NA	3648356	-0.531417	0.172451	2.576	0	no change	up	no: ATACseq no change, RNAseq up
C2_00680C_A	peak_1727	Promoter (<=1kb)	SOD5	3638886	0.760933	0.0233828	0.316	0.337	up	no change	no: ATACseq up, RNAseq no change
CR_04960C_A	peak_6688	Promoter (<=1kb)	CRG1	3646393	0.760562	0.000858446	4.944	0	up	up	same: up
C7_00340C_A	peak_5730	Promoter (<=1kb)	NA	3638040	0.759414	0.0096209	0.277	0.307	up	no change	no: ATACseq up, RNAseq no change
C6_00760W_A	peak_5182	Promoter (<=1kb)	NA	3647080	0.759303	0.000238872	0.418	0.075	up	no change	no: ATACseq up, RNAseq no change
CR_01730W_A	peak_6353	Promoter (<=1kb)	IFU5	3640116	0.757666	0.00045137	2.899	0	up	up	same: up
C1_06970C_A	peak_766	Promoter (<=1kb)	NA	3639567	0.755684	0.000532701	1.41	0	up	up	same: up
C3_04060C_A	peak_3231	Promoter (<=1kb)	HEM13	3647390	0.752286	0.00892265	0.313	0.304	up	no change	no: ATACseq up, RNAseq no change
C6_03660C_A	peak_5482	Promoter (1-2kb)	CDC50	3640302	0.750796	0.0394641	-0.038	0.884	up	no change	no: ATACseq up, RNAseq no change
C6_03370W_A	peak_5450	Promoter (1-2kb)	NA	3639230	0.750403	0.000217267	0.952	0.003	up	up	same: up
C1_10930C_A	peak_1218	Promoter (<=1kb)	UBA4	3644432	0.747359	0.0135344	-0.436	0.076	up	no change	no: ATACseq up, RNAseq no change
C3_06600C_A	peak_3561	Promoter (<=1kb)	NA	3642280	0.745964	0.0381285	0.99	0	up	up	same: up
C6_02480W_A	peak_5370	Promoter (<=1kb)	NA	3639170	0.743921	0.000633756	5.158	0	up	up	same: up
C1_14200W_A	peak_1584	Promoter (<=1kb)	NA	3643301	0.742766	0.00110467	0.949	0	up	up	same: up
CR_08200C_A	peak_7076	Promoter (<=1kb)	NA	3642087	0.738831	0.0154497	0.716	0.018	up	up	same: up
C7_01650W_A	peak_5871	Promoter (<=1kb)	NA	3636984	0.73826	0.0115403	1.824	0	up	up	same: up
C3_02570W_A	peak_3083	Promoter (<=1kb)	NA	3638375	0.738067	0.231291	2.178	0	no change	up	no: ATACseq no change, RNAseq up
C2_02860W_A	peak_1946	Promoter (<=1kb)	SUR2	3642973	0.733171	0.00276866	-0.299	0.443	up	no change	no: ATACseq up, RNAseq no change
C1_10460W_A	peak_1169	Promoter (<=1kb)	NA	3647183	0.732678	0.0214286	1.458	0	up	up	same: up
CR_06550C_A	peak_6875	Promoter (<=1kb)	NA	3645260	0.731981	0.00411869	2.032	0	up	up	same: up
C1_11330C_A	peak_1257	Downstream (<1kb)	SMT3	3644550	-0.266104	0.519235	0.862	0.01	no change	up	no: ATACseq no change, RNAseq up
C2_03540W_A	peak_2049	Promoter (<=1kb)	RAD32	3637340	0.731978	0.00080003	0.005	0.986	up	no change	no: ATACseq up, RNAseq no change
C1_03750W_A	peak_442	Promoter (<=1kb)	NA	3644690	0.729728	0.00124702	1.627	0	up	up	same: up
C3_04910C_A	peak_3327	Promoter (<=1kb)	NCE102	3635267	0.728533	0.000267461	-0.182	0.524	up	no change	no: ATACseq up, RNAseq no change
C3_06620W_A	peak_3564	Promoter (<=1kb)	FUN31	3642249	0.728408	0.000546278	1.127	0	up	up	same: up
C1_08950W_A	peak_983	Promoter (1-2kb)	PFK26	3634912	0.72106	0.00206415	1.146	0	up	up	same: up
C1_10220C_A	peak_1134	Promoter (<=1kb)	TPK1	3634879	0.717535	0.000731579	-0.004	0.984	up	no change	no: ATACseq up, RNAseq no change
C3_03420C_A	peak_3159	Promoter (<=1kb)	NDE1	3638354	0.710694	0.000380085	0.336	0.198	up	no change	no: ATACseq up, RNAseq no change
C1_09150W_A	peak_1015	Promoter (<=1kb)	AOX2	3634945	0.708509	0.0408048	2.887	0	up	up	same: up
C2_02180W_A	peak_1885	Promoter (<=1kb)	NA	3635752	0.706189	0.0161682	0.02	0.99	up	no change	no: ATACseq up, RNAseq no change
C1_11450C_A	peak_1266	Exon (C1_11450C_A/C1_11450C_A, exon 1 of 1)	SAM2	3644538	-0.640016	0.00717392	-2.485	0	down	down	same: down
C2_04010C_A	peak_2090	Promoter (<=1kb)	HSP21	3637364	0.705571	0.00386493	7.679	0	up	up	same: up
C6_04210C_A	peak_5565	Promoter (<=1kb)	ATM1	3646284	0.704421	0.00259192	4.141	0	up	up	same: up
C2_09460C_A	peak_2640	Promoter (1-2kb)	RHA1	3647713	0.70269	0.000722517	-0.235	0.349	up	no change	no: ATACseq up, RNAseq no change
C1_14590C_A	peak_1650	Promoter (<=1kb)	TLO4	30515080	0.702421	0.0102368	0.366	0.291	up	no change	no: ATACseq up, RNAseq no change
C1_11470C_A	peak_1270	Downstream (<1kb)	DPP1	3644537	-0.042728	0.890511	-0.618	0.044	no change	down	no: ATACseq no change, RNAseq down
C1_12910W_A	peak_1415	Promoter (<=1kb)	NA	30515066	0.700143	0.000388027	2.87	0	up	up	same: up
C1_08610C_A	peak_963	Promoter (<=1kb)	NA	3646512	0.698569	0.00117067	1.746	0	up	up	same: up
CR_06340C_A	peak_6850	Promoter (<=1kb)	PGI1	3644847	0.696982	0.0009362	0.603	0.053	up	no change	no: ATACseq up, RNAseq no change
C4_02330C_A	peak_3984	Promoter (<=1kb)	NA	3637884	0.696959	0.0077717	3.861	0	up	up	same: up
C5_01580C_A	peak_4694	Promoter (<=1kb)	CEF3	3647040	0.696311	0.00712594	-2.389	0	up	down	no: ATACseq up, RNAseq down
C2_01090C_A	peak_1770	Promoter (<=1kb)	ERG28	3638833	0.695292	0.00810383	-0.385	0.287	up	no change	no: ATACseq up, RNAseq no change
C1_11480W_A	peak_1277	Exon (C1_11480W_A/C1_11480W_A, exon 1 of 1)	PHO84	3645348	-1.08927	0.0322037	-3.716	0	down	down	same: down
C1_11480W_A	peak_1278	Downstream (<1kb)	PHO84	3645348	-0.757582	0.0238861	-3.716	0	down	down	same: down
C4_01380W_A	peak_3908	Promoter (<=1kb)	ZCF27	3635631	0.692606	0.00998895	0.916	0.003	up	up	same: up
C1_00930C_A	peak_128	Exon (C1_00930C_A/C1_00930C_A, exon 5 of 5)	SIN3	3639282	0.106131	0.676238	0.121	0.68	no change	no change	same: no change
C2_09980W_A	peak_2697	Promoter (<=1kb)	NA	3643965	0.690491	0.00631639	2.558	0	up	up	same: up
C1_11520C_A	peak_1281	Exon (C1_11520C_A/C1_11520C_A, exon 1 of 1)	ZCF3	3645335	-0.0630724	0.917369	-1.134	0	no change	down	no: ATACseq no change, RNAseq down
C3_06880W_A	peak_3597	Promoter (<=1kb)	NA	3638539	0.687832	0.00242194	0.622	0.322	up	no change	no: ATACseq up, RNAseq no change
C4_01400W_A	peak_3912	Promoter (<=1kb)	UEC1	3635628	0.687461	0.0491013	-2.016	0	up	down	no: ATACseq up, RNAseq down
C3_00360W_A	peak_2852	Promoter (1-2kb)	NA	3640542	0.687098	0.00732746	0.796	0.053	up	no change	no: ATACseq up, RNAseq no change
C2_03280W_A	peak_2009	Promoter (<=1kb)	NSP1	3637430	0.686764	0.109446	-0.096	0.722	no change	no change	same: no change
C1_13330C_A	peak_1465	Promoter (<=1kb)	NA	3636150	0.685843	0.00163089	-2.012	0	up	down	no: ATACseq up, RNAseq down
C4_02990C_A	peak_4061	Promoter (<=1kb)	GST2	3637937	0.685757	0.0113506	6.344	0	up	up	same: up
C1_11640C_A	peak_1288	5' UTR	DPP2	3645341	0.0276026	0.952829	-0.965	0	no change	down	no: ATACseq no change, RNAseq down
C2_03520C_A	peak_2046	Promoter (1-2kb)	ADAEC	3637342	0.684156	0.00107528	0.415	0.102	up	no change	no: ATACseq up, RNAseq no change
C1_09700W_A	peak_1079	Promoter (<=1kb)	NA	3634876	0.684146	0.11982	-1.617	0.021	no change	down	no: ATACseq no change, RNAseq down
C3_05930W_A	peak_3469	Promoter (<=1kb)	CTA4	3641743	0.683706	0.000731579	2.551	0	up	up	same: up
C2_09460C_A	peak_2638	Promoter (<=1kb)	RHA1	3647713	0.681558	0.00145674	-0.235	0.349	up	no change	no: ATACseq up, RNAseq no change
C1_13880C_A	peak_1533	Promoter (<=1kb)	NA	3636133	0.680877	0.153787	-0.202	0.405	no change	no change	same: no change
C4_02320C_A	peak_3983	Promoter (<=1kb)	SOD1	30515248	0.680801	0.00226996	1.869	0	up	up	same: up
C3_04270C_A	peak_3253	Promoter (<=1kb)	CTP1	3635141	0.676763	0.0154674	-0.173	0.462	up	no change	no: ATACseq up, RNAseq no change
C2_03110W_A	peak_1984	Promoter (<=1kb)	NA	3642995	0.673557	0.00124702	3.571	0	up	up	same: up
C1_11690W_A	peak_1296	Exon (C1_11690W_A/C1_11690W_A, exon 1 of 1)	NA	3645322	0.751903	0.056214	0.84	0.005	no change	up	no: ATACseq no change, RNAseq up
C1_11690W_A	peak_1297	Exon (C1_11690W_A/C1_11690W_A, exon 1 of 1)	NA	3645322	0.74283	0.0442663	0.84	0.005	up	up	same: up
C1_11700C_A	peak_1298	Exon (C1_11690W_A/C1_11690W_A, exon 1 of 1)	MRF1	3645321	1.07977	0.00400762	6.243	0	up	up	same: up
C1_11700C_A	peak_1299	Exon (C1_11700C_A/C1_11700C_A, exon 1 of 1)	MRF1	3645321	1.02433	0.0285796	6.243	0	up	up	same: up
C1_00100C_A	peak_13	Exon (C1_00100C_A/C1_00100C_A, exon 1 of 1)	NA	3639325	-0.26835	0.266004	-0.53	0.153	no change	no change	same: no change
C1_10800C_A	peak_1204	Promoter (<=1kb)	ALP1	3644437	0.67322	0.00150292	1.005	0	up	up	same: up
C2_03390C_A	peak_2025	Promoter (<=1kb)	HSP78	3637414	0.671404	0.00290706	4.071	0	up	up	same: up
C5_04370C_A	peak_4971	Promoter (<=1kb)	PGA37	3636484	0.670179	0.0127084	0.933	0.069	up	no change	no: ATACseq up, RNAseq no change
C4_03510C_A	peak_4116	Promoter (1-2kb)	HWP2	3646803	0.669068	0.0214135	0.543	0.456	up	no change	no: ATACseq up, RNAseq no change
C4_03510C_A	peak_4115	Promoter (1-2kb)	HWP2	3646803	0.668164	0.133289	0.543	0.456	no change	no change	same: no change
C3_01680C_A	peak_3007	Promoter (<=1kb)	NA	3636605	0.668102	0.0267998	-0.25	0.313	up	no change	no: ATACseq up, RNAseq no change
C2_07900W_A	peak_2477	Promoter (<=1kb)	GDH2	3642295	0.666247	0.000491007	1.587	0	up	up	same: up
C1_03380W_A	peak_404	Promoter (<=1kb)	TPS2	3636892	0.66325	0.00098857	2.293	0	up	up	same: up
C2_09460C_A	peak_2639	Promoter (1-2kb)	RHA1	3647713	0.662019	0.0183552	-0.235	0.349	up	no change	no: ATACseq up, RNAseq no change
CR_08340W_A	peak_7106	Promoter (<=1kb)	CYS3	3642081	0.661835	0.00427608	-0.198	0.462	up	no change	no: ATACseq up, RNAseq no change
C2_09590C_A	peak_2658	Promoter (<=1kb)	NA	3643800	0.660947	0.0305655	2.249	0	up	up	same: up
CR_03700C_A	peak_6572	Promoter (<=1kb)	NA	3643223	0.660344	0.00655163	-0.389	0.113	up	no change	no: ATACseq up, RNAseq no change
C5_03510C_A	peak_4886	Promoter (<=1kb)	NA	3646969	0.660066	0.000875105	2.721	0	up	up	same: up
C2_10690W_A	peak_2783	Promoter (<=1kb)	TPS3	3641205	0.659833	0.0523673	0.981	0	no change	up	no: ATACseq no change, RNAseq up
C3_03720W_A	peak_3183	Promoter (<=1kb)	GTT11	3645644	0.658339	0.000887833	3.949	0	up	up	same: up
C6_02670C_A	peak_5390	Promoter (1-2kb)	WSC2	3639225	0.658163	0.235759	-0.97	0.014	no change	down	no: ATACseq no change, RNAseq down
C1_11830W_A	peak_1314	Distal Intergenic	tY(GUA)4	30515059	1.17157	0.000105228	-1.613	0.059	up	no change	no: ATACseq up, RNAseq no change
C1_06850W_A	peak_756	Promoter (<=1kb)	PCL7	3639491	0.658012	0.000633756	0.88	0	up	up	same: up
C2_05150W_A	peak_2197	Promoter (<=1kb)	PEX2	3643460	0.656619	0.166538	0.865	0	no change	up	no: ATACseq no change, RNAseq up
C1_08320W_A	peak_924	Promoter (<=1kb)	TKL1	3640767	0.654469	0.0484832	1.37	0	up	up	same: up
C1_11850W_A	peak_1318	5' UTR	NA	3642010	0.881337	0.00482745	4.613	0	up	up	same: up
C1_11850W_A	peak_1319	Exon (C1_11850W_A/C1_11850W_A, exon 1 of 1)	NA	3642010	1.1193	0.0386887	4.613	0	up	up	same: up
C7_01170C_A	peak_5828	Promoter (<=1kb)	NA	3645914	0.652539	0.0144156	0.567	0.23	up	no change	no: ATACseq up, RNAseq no change
C1_03990W_A	peak_473	Promoter (<=1kb)	NA	3646424	0.652308	0.0197138	5.089	0	up	up	same: up
CR_02820W_A	peak_6488	Promoter (<=1kb)	PGM2	3642562	0.650754	0.00738525	0.746	0.014	up	up	same: up
C4_00450C_A	peak_3800	Promoter (<=1kb)	PGA10	3645009	0.649033	0.123132	3.297	0	no change	up	no: ATACseq no change, RNAseq up
CR_07150W_A	peak_6942	Promoter (<=1kb)	GLK1	3648348	0.648754	0.0247208	3.529	0	up	up	same: up
C6_02060W_A	peak_5328	Promoter (1-2kb)	SLM2	3647559	0.648517	0.146155	0.074	0.776	no change	no change	same: no change
C3_04170W_A	peak_3244	Promoter (<=1kb)	NA	3635182	0.648505	0.0399912	3.31	0	up	up	same: up
C3_06660C_A	peak_3567	Promoter (1-2kb)	NA	3642253	0.64652	0.00226996	0.771	0.233	up	no change	no: ATACseq up, RNAseq no change
CR_10260W_A	peak_7454	Promoter (<=1kb)	NA	3638932	0.643449	0.00178858	1.554	0	up	up	same: up
C6_01880W_A	peak_5310	Promoter (<=1kb)	NA	3641599	0.642574	0.00355234	0.119	0.664	up	no change	no: ATACseq up, RNAseq no change
C1_10320W_A	peak_1147	Promoter (<=1kb)	NA	3634907	0.642134	0.171771	0.477	0.193	no change	no change	same: no change
C1_00990C_A	peak_133	Exon (C1_00990C_A/C1_00990C_A, exon 1 of 1)	NMA111	3640179	-0.18505	0.59624	-2.883	0	no change	down	no: ATACseq no change, RNAseq down
C3_02600C_A	peak_3086	Promoter (<=1kb)	SLC1	3638324	0.642024	0.0315968	-1.423	0	up	down	no: ATACseq up, RNAseq down
C4_05590W_A	peak_4324	Promoter (<=1kb)	NA	3641776	0.64025	0.0025125	1.413	0	up	up	same: up
C1_14120C_A	peak_1572	Promoter (1-2kb)	RBE1	3643317	0.639455	0.00128389	-3.729	0	up	down	no: ATACseq up, RNAseq down
C1_11980W_A	peak_1333	Downstream (2-3kb)	MED10	3642043	0.0306045	0.939108	0.984	0	no change	up	no: ATACseq no change, RNAseq up
C7_03490W_A	peak_6063	Promoter (<=1kb)	GYP7	3646245	0.638797	0.0263271	3.268	0	up	up	same: up
C1_02840W_A	peak_344	Promoter (1-2kb)	PDE2	3636877	0.638743	0.0029203	0.362	0.199	up	no change	no: ATACseq up, RNAseq no change
CR_07780W_A	peak_7005	Promoter (<=1kb)	NA	3647352	0.638404	0.00473546	0.841	0	up	up	same: up
C2_06470W_A	peak_2335	Promoter (<=1kb)	RTA2	3646567	0.638149	0.00638735	-1.356	0	up	down	no: ATACseq up, RNAseq down
CR_02930W_A	peak_6508	Promoter (1-2kb)	NA	3642588	0.637093	0.0970697	-0.295	0.543	no change	no change	same: no change
CR_00090C_A	peak_6182	Promoter (<=1kb)	NA	3639734	0.632749	0.0540091	4.46	0	no change	up	no: ATACseq no change, RNAseq up
C1_08790W_A	peak_972	Promoter (<=1kb)	TPO3	3634790	0.631982	0.00193752	6.343	0	up	up	same: up
CR_07490C_A	peak_6972	Promoter (<=1kb)	GLK4	3646046	0.631003	0.14181	3.122	0	no change	up	no: ATACseq no change, RNAseq up
CR_05600C_A	peak_6756	Promoter (<=1kb)	tC(GCA)1	30515411	0.630935	0.0726012	-1.909	0.062	no change	no change	same: no change
C1_09660W_A	peak_1072	Promoter (<=1kb)	DOA1	3634871	0.628438	0.0542405	2.748	0	no change	up	no: ATACseq no change, RNAseq up
C1_12060C_A	peak_1345	Exon (C1_12050W_A/C1_12050W_A, exon 1 of 1)	NA	3642026	1.293	0.000632021	3.879	0	up	up	same: up
C1_01530C_A	peak_201	Promoter (<=1kb)	NA	3640232	0.628329	0.0102548	-0.602	0.014	up	down	no: ATACseq up, RNAseq down
C1_02250W_A	peak_285	Promoter (<=1kb)	CWH8	3644598	0.627275	0.121633	-2.654	0	no change	down	no: ATACseq no change, RNAseq down
C6_01370W_A	peak_5252	Promoter (<=1kb)	NA	3641607	0.626248	0.050174	1.484	0	no change	up	no: ATACseq no change, RNAseq up
C4_00680W_A	peak_3819	Promoter (<=1kb)	NA	3645753	0.625806	0.0109212	1.608	0	up	up	same: up
C5_02640W_A	peak_4790	Promoter (<=1kb)	NA	3637785	0.625603	0.0307039	0.298	0.254	up	no change	no: ATACseq up, RNAseq no change
C2_00480C_A	peak_1709	Promoter (<=1kb)	PHHB	3638871	0.624395	0.0325941	1.556	0	up	up	same: up
C2_07070W_A	peak_2409	Promoter (<=1kb)	NA	3643501	0.623554	0.0121779	6.288	0	up	up	same: up
C2_03250W_A	peak_2005	Promoter (<=1kb)	AVT7	3637433	0.622229	0.116825	0.356	0.143	no change	no change	same: no change
C4_03180W_A	peak_4079	Promoter (<=1kb)	NCP1	3637839	0.619133	0.0609005	-0.609	0.017	no change	down	no: ATACseq no change, RNAseq down
C1_10840C_A	peak_1208	Promoter (<=1kb)	NA	3644452	0.618919	0.0011578	0.927	0	up	up	same: up
CR_01400W_A	peak_6324	Promoter (<=1kb)	LYS12	3640134	0.618856	0.00392733	0.627	0.012	up	up	same: up
CR_00790C_A	peak_6268	Promoter (<=1kb)	NA	NA	0.612566	0.00192775	-0.527	0.424	up	no change	no: ATACseq up, RNAseq no change
C7_03720C_A	peak_6075	Promoter (<=1kb)	HIS7	3647868	0.611644	0.0449734	0.386	0.18	up	no change	no: ATACseq up, RNAseq no change
C4_04590W_A	peak_4225	Promoter (<=1kb)	SCS7	3641157	0.611177	0.108569	-1.669	0	no change	down	no: ATACseq no change, RNAseq down
CR_04510W_A	peak_6652	Promoter (<=1kb)	HXK2	3641015	0.609799	0.00986467	1.127	0	up	up	same: up
C2_08640C_A	peak_2546	Promoter (<=1kb)	PST2	3643909	0.606897	0.014893	2.116	0	up	up	same: up
C2_06420C_A	peak_2324	Promoter (<=1kb)	RTS1	3646557	0.606783	0.0247925	0.861	0.001	up	up	same: up
C6_02560W_A	peak_5380	Promoter (<=1kb)	NA	3639205	0.606715	0.0087203	1.638	0	up	up	same: up
C3_04800C_A	peak_3312	Promoter (<=1kb)	NA	3635216	0.606602	0.0728099	2.87	0	no change	up	no: ATACseq no change, RNAseq up
C2_08940C_A	peak_2573	Promoter (<=1kb)	VPS28	3645794	0.605639	0.0528593	1.259	0	no change	up	no: ATACseq no change, RNAseq up
C3_06100C_A	peak_3488	Promoter (<=1kb)	DED1	3641752	0.602342	0.0045599	-2.531	0	up	down	no: ATACseq up, RNAseq down
CR_05390W_A	peak_6737	Promoter (<=1kb)	PST3	3648031	0.600566	0.0020333	1.834	0	up	up	same: up
C1_09170W_A	peak_1016	Promoter (1-2kb)	CTA8	3634947	0.59742	0.277922	-1.268	0	no change	down	no: ATACseq no change, RNAseq down
C5_05480W_A	peak_5085	Promoter (<=1kb)	DES1	3636529	0.597135	0.0345618	-0.018	0.954	up	no change	no: ATACseq up, RNAseq no change
CR_10350C_A	peak_7473	Promoter (<=1kb)	TRX1	3638950	0.596543	0.00151967	3.363	0	up	up	same: up
C1_01030W_A	peak_137	Exon (C1_01030W_A/C1_01030W_A, exon 1 of 1)	HMT1	3640182	-0.63329	0.0302915	-2.112	0	down	down	same: down
C1_12420C_A	peak_1370	Exon (C1_12420C_A/C1_12420C_A, exon 1 of 1)	NA	NA	-0.145534	0.557074	1.108	0.001	no change	up	no: ATACseq no change, RNAseq up
CR_02560C_A	peak_6441	Promoter (<=1kb)	ASG1	3647687	0.596358	0.0964066	-0.565	0.071	no change	no change	same: no change
CR_09930W_A	peak_7416	Promoter (<=1kb)	NA	3639029	0.595877	0.297157	2.092	0	no change	up	no: ATACseq no change, RNAseq up
C6_02060W_A	peak_5329	Promoter (<=1kb)	SLM2	3647559	0.595465	0.0020333	0.074	0.776	up	no change	no: ATACseq up, RNAseq no change
C1_05260C_A	peak_611	Promoter (<=1kb)	SDH1	3642477	0.595267	0.0626184	1.176	0	no change	up	no: ATACseq no change, RNAseq up
C1_12460C_A	peak_1375	Downstream (<1kb)	NA	NA	0.568579	0.326201	2.013	0	no change	up	no: ATACseq no change, RNAseq up
C1_12460C_A	peak_1376	Exon (C1_12460C_A/C1_12460C_A, exon 1 of 1)	NA	NA	0.799191	0.00274294	2.013	0	up	up	same: up
C1_12460C_A	peak_1377	5' UTR	NA	NA	0.988322	0.00776407	2.013	0	up	up	same: up
C1_05870W_A	peak_652	Promoter (<=1kb)	PRN3	3639878	0.592684	0.0180484	3.68	0	up	up	same: up
C1_12480W_A	peak_1379	Distal Intergenic	NA	30515063	0.852385	0.00986467	-0.022	0.948	up	no change	no: ATACseq up, RNAseq no change
C4_04570W_A	peak_4218	Promoter (<=1kb)	RCE1	3641104	0.591774	0.129066	0.514	0.015	no change	up	no: ATACseq no change, RNAseq up
C1_12480W_A	peak_1380	Distal Intergenic	NA	30515063	-0.0207215	0.961727	-0.022	0.948	no change	no change	same: no change
C4_03890W_A	peak_4148	Promoter (<=1kb)	PTP2	3647858	0.589958	0.00404685	3.491	0	up	up	same: up
C2_09730C_A	peak_2667	Promoter (<=1kb)	IPK2	3643784	0.588858	0.00584243	0.1	0.705	up	no change	no: ATACseq up, RNAseq no change
C4_02540W_A	peak_4016	Promoter (1-2kb)	RGT1	3637920	0.588773	0.0122252	-0.509	0.154	up	no change	no: ATACseq up, RNAseq no change
C1_08940C_A	peak_981	Promoter (<=1kb)	MSN4	3634911	0.587348	0.00184687	2.766	0	up	up	same: up
C3_05670C_A	peak_3439	Promoter (1-2kb)	NA	NA	0.586456	0.0872874	-0.578	0.101	no change	no change	same: no change
C2_07260C_A	peak_2425	Promoter (<=1kb)	DQD1	3643488	0.586242	0.00528846	2.014	0	up	up	same: up
CR_01690C_A	peak_6350	Promoter (<=1kb)	CDC60	3640128	0.584619	0.157845	-1.16	0	no change	down	no: ATACseq no change, RNAseq down
C2_09710C_A	peak_2666	Promoter (<=1kb)	NA	3643786	0.584564	0.0210608	2.896	0	up	up	same: up
C1_04450C_A	peak_516	Promoter (<=1kb)	FMA1	3647986	0.584101	0.00425646	1.121	0	up	up	same: up
C1_01040W_A	peak_139	Exon (C1_01040W_A/C1_01040W_A, exon 1 of 1)	NA	3640183	-0.173249	0.609136	2.566	0	no change	up	no: ATACseq no change, RNAseq up
CR_09900C_A	peak_7412	Promoter (<=1kb)	DPB2	3639026	0.580281	0.209153	0.503	0.029	no change	up	no: ATACseq no change, RNAseq up
C3_06610W_A	peak_3563	Promoter (<=1kb)	NA	3642248	0.578647	0.0862729	1.661	0	no change	up	no: ATACseq no change, RNAseq up
C6_00320C_A	peak_5136	Promoter (<=1kb)	DNA2	3646072	0.57711	0.0475087	1.671	0	up	up	same: up
C1_03390W_A	peak_405	Promoter (<=1kb)	EHT1	3636894	0.576718	0.0993422	0.29	0.209	no change	no change	same: no change
C5_03020W_A	peak_4823	Promoter (<=1kb)	CCC2	3637821	0.57661	0.00998895	-0.333	0.237	up	no change	no: ATACseq up, RNAseq no change
C2_03400C_A	peak_2026	Promoter (<=1kb)	DFG16	3637413	0.575511	0.0687733	0.378	0.094	no change	no change	same: no change
CR_02350C_A	peak_6423	Promoter (<=1kb)	GEF2	3644935	0.575006	0.00348292	1.914	0	up	up	same: up
C6_00280W_A	peak_5124	Promoter (<=1kb)	CPH2	3646067	0.573826	0.0029203	0.082	0.735	up	no change	no: ATACseq up, RNAseq no change
C5_04680W_A	peak_4993	Promoter (<=1kb)	PSD2	3636515	0.571099	0.0512384	1.143	0	no change	up	no: ATACseq no change, RNAseq up
CR_09800C_A	peak_7396	Promoter (<=1kb)	NA	3638984	0.570527	0.0528428	-1.997	0	no change	down	no: ATACseq no change, RNAseq down
C1_00110W_A	peak_14	Exon (C1_00110W_A/C1_00110W_A, exon 1 of 1)	CCT8	3639324	-0.270675	0.246722	-0.787	0.002	no change	down	no: ATACseq no change, RNAseq down
C1_01040W_A	peak_140	Exon (C1_01040W_A/C1_01040W_A, exon 1 of 1)	NA	3640183	-0.310424	0.510704	2.566	0	no change	up	no: ATACseq no change, RNAseq up
C2_03590C_A	peak_2054	Promoter (<=1kb)	CAP4	3637335	0.569855	0.0108787	2.09	0	up	up	same: up
C1_12730W_A	peak_1401	5' UTR	RVS162	3646820	0.134275	0.702778	1.354	0	no change	up	no: ATACseq no change, RNAseq up
C2_06970W_A	peak_2404	Promoter (<=1kb)	AAH1	3643529	0.569311	0.00730828	-2.555	0	up	down	no: ATACseq up, RNAseq down
C2_08300C_A	peak_2517	Promoter (<=1kb)	NA	NA	0.568992	0.00355389	5.03	0	up	up	same: up
C5_03620W_A	peak_4894	Promoter (<=1kb)	BTS1	3646982	0.568343	0.0126541	1.838	0	up	up	same: up
C1_01220C_A	peak_164	Promoter (<=1kb)	NA	3640210	0.56827	0.0230499	3.294	0	up	up	same: up
C3_04520C_A	peak_3275	Promoter (1-2kb)	ADE2	3635259	0.567342	0.0302665	-1.646	0	up	down	no: ATACseq up, RNAseq down
C3_05540C_A	peak_3420	Promoter (<=1kb)	NA	3643658	0.565855	0.0958181	-1.885	0	no change	down	no: ATACseq no change, RNAseq down
C3_00670C_A	peak_2888	Promoter (<=1kb)	FKH2	3640536	0.564255	0.0195905	-0.593	0.014	up	down	no: ATACseq up, RNAseq down
C4_01750C_A	peak_3939	Promoter (<=1kb)	FBA1	3635585	0.564198	0.0020333	0.854	0.016	up	up	same: up
C3_03230C_A	peak_3138	Promoter (<=1kb)	NA	3638316	0.563678	0.026136	2.597	0	up	up	same: up
C2_01710W_A	peak_1830	Promoter (<=1kb)	HSK3	3635730	0.563546	0.00619278	0.374	0.301	up	no change	no: ATACseq up, RNAseq no change
C1_12850W_A	peak_1411	Exon (C1_12860C_A/C1_12860C_A, exon 1 of 1)	BLP1	30515065	-0.145019	0.492971	2.044	0	no change	up	no: ATACseq no change, RNAseq up
C4_02520C_A	peak_4010	Promoter (<=1kb)	NA	3637863	0.563494	0.0467545	1.885	0	up	up	same: up
C1_10740C_A	peak_1197	Promoter (<=1kb)	ASR1	3644402	0.562062	0.0561461	4.632	0	no change	up	no: ATACseq no change, RNAseq up
C1_06820W_A	peak_753	Promoter (<=1kb)	NA	3639493	0.561977	0.0173868	-2.581	0	up	down	no: ATACseq up, RNAseq down
C2_07420W_A	peak_2437	Promoter (<=1kb)	NA	3645202	0.561416	0.0993422	-0.849	0	no change	down	no: ATACseq no change, RNAseq down
C1_12910W_A	peak_1416	Downstream (<1kb)	NA	30515066	0.0958667	0.778327	2.87	0	no change	up	no: ATACseq no change, RNAseq up
C2_04400W_A	peak_2126	Promoter (<=1kb)	NA	3645457	0.560142	0.0113302	1.098	0	up	up	same: up
C2_00760C_A	peak_1736	Promoter (<=1kb)	NA	3638910	0.559983	0.0361218	6.848	0	up	up	same: up
C1_11670W_A	peak_1291	Promoter (<=1kb)	NA	3645338	0.559368	0.0930138	1.757	0	no change	up	no: ATACseq no change, RNAseq up
C1_01060W_A	peak_142	Exon (C1_01070C_A/C1_01070C_A, exon 1 of 1)	MBF1	3640171	0.134803	0.700966	1.133	0	no change	up	no: ATACseq no change, RNAseq up
C1_01520C_A	peak_199	Promoter (<=1kb)	SOD2	3640231	0.55924	0.0062953	2.393	0	up	up	same: up
C1_10410W_A	peak_1164	Promoter (<=1kb)	NA	3634840	0.558586	0.159778	1.45	0	no change	up	no: ATACseq no change, RNAseq up
C2_02390W_A	peak_1908	Promoter (<=1kb)	NA	3635829	0.557589	0.031661	-0.446	0.205	up	no change	no: ATACseq up, RNAseq no change
C1_10740C_A	peak_1198	Promoter (<=1kb)	ASR1	3644402	0.557503	0.0657502	4.632	0	no change	up	no: ATACseq no change, RNAseq up
C1_05690C_A	peak_641	Promoter (<=1kb)	NA	3639896	0.557346	0.00819484	3.499	0	up	up	same: up
CR_07060C_A	peak_6926	Promoter (1-2kb)	CRZ2	3645725	0.555799	0.0077328	-0.626	0.137	up	no change	no: ATACseq up, RNAseq no change
C2_09820W_A	peak_2676	Promoter (<=1kb)	NA	3643801	0.555543	0.274623	1.483	0	no change	up	no: ATACseq no change, RNAseq up
C3_01560W_A	peak_2997	Promoter (<=1kb)	NA	3636669	0.553106	0.00986467	-3.066	0	up	down	no: ATACseq up, RNAseq down
C4_00770C_A	peak_3829	Promoter (1-2kb)	NA	3645760	0.552986	0.268228	-0.147	0.531	no change	no change	same: no change
C6_03620C_A	peak_5477	Promoter (<=1kb)	NA	3640297	0.551947	0.0433667	2.066	0	up	up	same: up
C5_00130C_A	peak_4515	Promoter (<=1kb)	NA	3647881	0.549289	0.13564	-1.904	0	no change	down	no: ATACseq no change, RNAseq down
C3_07660W_A	peak_3704	Promoter (<=1kb)	NA	3638462	0.547457	0.234087	0.378	0.073	no change	no change	same: no change
C7_00360W_A	peak_5732	Promoter (<=1kb)	DFI1	3638038	0.547109	0.0141961	-2.595	0	up	down	no: ATACseq up, RNAseq down
C6_03180C_A	peak_5431	Promoter (<=1kb)	NA	3639261	0.546989	0.00921659	-0.038	0.925	up	no change	no: ATACseq up, RNAseq no change
C6_03380W_A	peak_5453	Promoter (<=1kb)	NA	3639231	0.545504	0.20325	-1.979	0	no change	down	no: ATACseq no change, RNAseq down
C1_13140C_A	peak_1440	Exon (C1_13140C_A/C1_13140C_A, exon 1 of 1)	TYE7	3636203	-0.130122	0.796921	-2.267	0	no change	down	no: ATACseq no change, RNAseq down
C6_01870C_A	peak_5309	Promoter (<=1kb)	NA	3641625	0.545331	0.00754047	4.098	0	up	up	same: up
C1_13150W_A	peak_1442	Exon (C1_13150W_A/C1_13150W_A, exon 1 of 1)	NA	NA	0.190772	0.491925	-2.853	0	no change	down	no: ATACseq no change, RNAseq down
C1_13150W_A	peak_1443	Distal Intergenic	NA	NA	0.617789	0.0148242	-2.853	0	up	down	no: ATACseq up, RNAseq down
C1_13150W_A	peak_1444	Distal Intergenic	NA	NA	0.900737	0.00643962	-2.853	0	up	down	no: ATACseq up, RNAseq down
C1_03270W_A	peak_391	Promoter (<=1kb)	NA	3636900	0.545259	0.0353289	4.02	0	up	up	same: up
C7_01690W_A	peak_5878	Promoter (<=1kb)	NA	3636980	0.544903	0.326187	1.383	0	no change	up	no: ATACseq no change, RNAseq up
C3_07310C_A	peak_3649	Promoter (<=1kb)	SLK19	3638466	0.544871	0.116825	1.025	0.003	no change	up	no: ATACseq no change, RNAseq up
C5_05050W_A	peak_5042	Promoter (<=1kb)	ADH1	3636489	0.544798	0.00358331	0.594	0.277	up	no change	no: ATACseq up, RNAseq no change
C7_02040C_A	peak_5940	Promoter (1-2kb)	CUP9	3636950	0.544297	0.00352405	-0.75	0.006	up	down	no: ATACseq up, RNAseq down
C3_04480C_A	peak_3265	Promoter (<=1kb)	RAS2	3635211	0.544203	0.0112686	3.785	0	up	up	same: up
C2_04560W_A	peak_2139	Promoter (<=1kb)	KTR2	3645443	0.543351	0.0293398	1.216	0	up	up	same: up
C1_08040W_A	peak_899	Promoter (<=1kb)	NA	30515028	0.542496	0.0470356	0.581	0.114	up	no change	no: ATACseq up, RNAseq no change
C1_10180C_A	peak_1126	Promoter (<=1kb)	ECM21	3634784	0.542463	0.00406864	1.104	0	up	up	same: up
C6_03700W_A	peak_5488	Promoter (<=1kb)	ALS1	3640280	0.542306	0.00178858	2.266	0	up	up	same: up
C1_13870W_A	peak_1526	Promoter (<=1kb)	MET3	3636132	0.542287	0.146227	-1.967	0	no change	down	no: ATACseq no change, RNAseq down
C1_05840W_A	peak_649	Promoter (<=1kb)	PRN1	3639882	0.542231	0.00730828	6.682	0	up	up	same: up
CR_00980C_A	peak_6292	Promoter (<=1kb)	CAB3	3640426	0.542198	0.0592557	1.517	0	no change	up	no: ATACseq no change, RNAseq up
C1_01520C_A	peak_200	Promoter (<=1kb)	SOD2	3640231	0.541419	0.0551632	2.393	0	no change	up	no: ATACseq no change, RNAseq up
C6_01860C_A	peak_5308	Promoter (<=1kb)	HCH1	3641626	0.54037	0.0334616	-0.201	0.39	up	no change	no: ATACseq up, RNAseq no change
C3_04920C_A	peak_3329	Promoter (<=1kb)	NA	3635268	0.539732	0.0666478	3.364	0	no change	up	no: ATACseq no change, RNAseq up
C1_10650W_A	peak_1187	Promoter (<=1kb)	APN2	3647674	0.539505	0.0353324	-0.308	0.2	up	no change	no: ATACseq up, RNAseq no change
C1_13290W_A	peak_1460	5' UTR	NA	3636146	0.0458414	0.948571	1.793	0	no change	up	no: ATACseq no change, RNAseq up
C4_06760W_A	peak_4442	Promoter (<=1kb)	GUT2	3642921	0.539379	0.00354522	0.803	0.001	up	up	same: up
C4_05300W_A	peak_4300	Promoter (<=1kb)	XKS1	3648306	0.538734	0.0146444	2.718	0	up	up	same: up
C7_00420C_A	peak_5740	Promoter (<=1kb)	NA	3638032	0.537728	0.0174399	1.141	0	up	up	same: up
CR_09780C_A	peak_7392	Promoter (1-2kb)	IFA14	3639012	0.537547	0.0325598	1.618	0	up	up	same: up
C1_09690W_A	peak_1077	Promoter (<=1kb)	MLS1	3634875	0.53458	0.00691321	5.477	0	up	up	same: up
CR_03920C_A	peak_6609	Promoter (<=1kb)	TPO4	3640956	0.533763	0.00784945	1.655	0	up	up	same: up
C3_00360W_A	peak_2854	Promoter (<=1kb)	NA	3640542	0.53369	0.0256951	0.796	0.053	up	no change	no: ATACseq up, RNAseq no change
C2_08790W_A	peak_2553	Promoter (<=1kb)	JEM1	3643876	0.532886	0.0818204	0.729	0.002	no change	up	no: ATACseq no change, RNAseq up
C2_05470W_A	peak_2227	Promoter (<=1kb)	COQ5	3643416	0.531802	0.0143328	-0.83	0	up	down	no: ATACseq up, RNAseq down
C1_01110C_A	peak_147	5' UTR	ZPR1	3640177	0.0926645	0.757624	-2.357	0	no change	down	no: ATACseq no change, RNAseq down
C2_03270W_A	peak_2008	Promoter (<=1kb)	GPM1	3637431	0.531688	0.0040787	0.585	0.071	up	no change	no: ATACseq up, RNAseq no change
C7_02330W_A	peak_5961	Promoter (<=1kb)	YCF1	3636934	0.530987	0.00925789	1.945	0	up	up	same: up
CR_10840C_A	peak_7531	Promoter (<=1kb)	XYL2	3638961	0.530866	0.0177857	2.657	0	up	up	same: up
C4_01720C_A	peak_3935	Promoter (<=1kb)	NA	3635589	0.530771	0.062907	-1.612	0	no change	down	no: ATACseq no change, RNAseq down
C1_07930C_A	peak_880	Promoter (<=1kb)	ERD1	3640723	0.529241	0.127922	-1.291	0.002	no change	down	no: ATACseq no change, RNAseq down
C1_05440C_A	peak_625	Promoter (<=1kb)	NA	3642489	0.528067	0.0834405	3.958	0	no change	up	no: ATACseq no change, RNAseq up
C7_01920W_A	peak_5904	Promoter (<=1kb)	CDC34	3637028	0.525362	0.00511856	1.372	0	up	up	same: up
C1_13260W_A	peak_1458	Promoter (<=1kb)	NA	30515074	0.524764	0.0429934	1.657	0	up	up	same: up
C3_07590W_A	peak_3698	Promoter (<=1kb)	NA	3638496	0.523751	0.041599	-0.3	0.324	up	no change	no: ATACseq up, RNAseq no change
CR_03720W_A	peak_6574	Promoter (<=1kb)	TAL1	3643225	0.523352	0.00552591	2.276	0	up	up	same: up
C3_07380W_A	peak_3661	Promoter (<=1kb)	NA	3638473	0.522469	0.0463429	3.032	0	up	up	same: up
C4_00360C_A	peak_3789	Promoter (<=1kb)	RCH1	3645002	0.520535	0.0119879	-2.56	0	up	down	no: ATACseq up, RNAseq down
C1_13560W_A	peak_1483	Distal Intergenic	NA	3636174	0.140324	0.708679	-0.09	0.747	no change	no change	same: no change
C1_13570W_A	peak_1484	Distal Intergenic	MPT5	3636205	-0.189553	0.601247	-0.364	0.146	no change	no change	same: no change
C1_13570W_A	peak_1485	Distal Intergenic	MPT5	3636205	-0.0182439	0.962828	-0.364	0.146	no change	no change	same: no change
C5_05190W_A	peak_5057	Promoter (<=1kb)	PCL5	3636466	0.518368	0.00463673	3.502	0	up	up	same: up
C1_04470C_A	peak_522	Promoter (<=1kb)	NA	3646142	0.51823	0.0626184	0.482	0.105	no change	no change	same: no change
C3_00730W_A	peak_2899	Promoter (<=1kb)	NA	3640530	0.517996	0.146922	-0.554	0.022	no change	down	no: ATACseq no change, RNAseq down
C5_05310W_A	peak_5065	Promoter (<=1kb)	PRE1	3636500	0.517965	0.258383	2.187	0	no change	up	no: ATACseq no change, RNAseq up
C1_13850C_A	peak_1521	Promoter (<=1kb)	DAL7	3636130	0.51756	0.158031	0.564	0.428	no change	no change	same: no change
C1_10650W_A	peak_1188	Promoter (<=1kb)	APN2	3647674	0.516353	0.160395	-0.308	0.2	no change	no change	same: no change
C4_05590W_A	peak_4323	Promoter (<=1kb)	NA	3641776	0.515338	0.0322037	1.413	0	up	up	same: up
CR_07910C_A	peak_7037	Promoter (<=1kb)	NA	3644142	0.515172	0.0475138	1.798	0	up	up	same: up
C3_02300W_A	peak_3065	Promoter (<=1kb)	FGR23	3636555	0.514592	0.163115	-0.639	0.196	no change	no change	same: no change
CR_04480C_A	peak_6649	Promoter (<=1kb)	LAP3	3641012	0.512878	0.0371527	2.092	0	up	up	same: up
C7_03580C_A	peak_6068	Promoter (<=1kb)	NA	3646238	0.512468	0.0270094	3.755	0	up	up	same: up
CR_00520C_A	peak_6245	Promoter (<=1kb)	CRM1	3639721	0.512395	0.0202772	-0.094	0.758	up	no change	no: ATACseq up, RNAseq no change
C2_07430C_A	peak_2438	Promoter (<=1kb)	NA	3645201	0.512155	0.108787	1.451	0	no change	up	no: ATACseq no change, RNAseq up
C3_00370C_A	peak_2856	Promoter (<=1kb)	BUD21	3640541	0.511685	0.0814698	-2.393	0	no change	down	no: ATACseq no change, RNAseq down
CR_04510W_A	peak_6653	Promoter (<=1kb)	HXK2	3641015	0.507716	0.00716287	1.127	0	up	up	same: up
C1_10180C_A	peak_1127	Promoter (<=1kb)	ECM21	3634784	0.507582	0.416788	1.104	0	no change	up	no: ATACseq no change, RNAseq up
C4_01300W_A	peak_3893	Promoter (<=1kb)	NA	3635605	0.506453	0.00498409	-0.89	0.005	up	down	no: ATACseq up, RNAseq down
C4_02760C_A	peak_4046	Promoter (<=1kb)	CGR1	3637853	0.506362	0.149842	-0.691	0.009	no change	down	no: ATACseq no change, RNAseq down
CR_10340W_A	peak_7467	Promoter (1-2kb)	PTP3	3638940	0.506268	0.0224351	1.08	0	up	up	same: up
C3_06470W_A	peak_3542	Promoter (1-2kb)	AAF1	3642284	0.505508	0.0160139	0.768	0.026	up	up	same: up
CR_08000C_A	peak_7052	Promoter (<=1kb)	NA	3644150	0.503355	0.0377234	0.158	0.576	up	no change	no: ATACseq up, RNAseq no change
C7_01390W_A	peak_5840	Promoter (1-2kb)	NA	3645892	0.501741	0.0695311	-2.282	0	no change	down	no: ATACseq no change, RNAseq down
C1_04290C_A	peak_499	Promoter (<=1kb)	ACS2	3644710	0.49973	0.00602841	-0.696	0.008	up	down	no: ATACseq up, RNAseq down
C7_04210C_A	peak_6123	Promoter (<=1kb)	NA	3643121	0.49971	0.00545772	0.007	0.981	up	no change	no: ATACseq up, RNAseq no change
C2_00340C_A	peak_1697	Promoter (<=1kb)	ARO8	3638828	0.499347	0.0356293	2.447	0	up	up	same: up
C1_13700W_A	peak_1508	Intron (C1_13700W_A/C1_13700W_A, intron 1 of 1)	ACT1	3636195	-0.243337	0.321815	-0.075	0.802	no change	no change	same: no change
C3_06550C_A	peak_3554	Promoter (<=1kb)	NA	3642275	0.498914	0.166145	0.852	0.003	no change	up	no: ATACseq no change, RNAseq up
C1_01130W_A	peak_151	Exon (C1_01130W_A/C1_01130W_A, exon 1 of 1)	NA	3640178	-0.393707	0.3924	-0.178	0.466	no change	no change	same: no change
CR_07810W_A	peak_7015	Promoter (1-2kb)	YHB5	3647343	0.498595	0.0219694	-2.503	0	up	down	no: ATACseq up, RNAseq down
C1_01750W_A	peak_228	Promoter (<=1kb)	NA	3645413	0.498589	0.0724275	0.856	0	no change	up	no: ATACseq no change, RNAseq up
C2_10070W_A	peak_2708	Promoter (<=1kb)	NA	3643946	0.497901	0.020869	1.958	0	up	up	same: up
CR_01010W_A	peak_6294	Promoter (<=1kb)	TEN1	3640421	0.496962	0.163313	-2.858	0	no change	down	no: ATACseq no change, RNAseq down
C4_01400W_A	peak_3911	Promoter (<=1kb)	UEC1	3635628	0.496906	0.00862602	-2.016	0	up	down	no: ATACseq up, RNAseq down
C1_13800C_A	peak_1515	Exon (C1_13800C_A/C1_13800C_A, exon 1 of 1)	DUR32	3636142	-0.0547822	0.901652	0.989	0.001	no change	up	no: ATACseq no change, RNAseq up
C2_04050C_A	peak_2094	Promoter (<=1kb)	DCK1	3637383	0.496835	0.0431582	-0.778	0.001	up	down	no: ATACseq up, RNAseq down
C4_04330C_A	peak_4194	Promoter (<=1kb)	NA	3646840	0.495912	0.20325	0.073	0.875	no change	no change	same: no change
C5_00570W_A	peak_4589	Promoter (<=1kb)	NA	3641589	0.494795	0.0161799	0.905	0	up	up	same: up
C4_04770C_A	peak_4248	Promoter (<=1kb)	MNN22	3641117	0.494738	0.0161682	-0.522	0.031	up	down	no: ATACseq up, RNAseq down
C1_01130W_A	peak_152	Exon (C1_01130W_A/C1_01130W_A, exon 1 of 1)	NA	3640178	0.309363	0.415576	-0.178	0.466	no change	no change	same: no change
C1_08020W_A	peak_897	Promoter (<=1kb)	UBA2	3640701	0.494431	0.0879033	-0.471	0.026	no change	down	no: ATACseq no change, RNAseq down
C1_02820W_A	peak_341	Promoter (<=1kb)	LYS2	3636875	0.494411	0.211195	0.694	0.015	no change	up	no: ATACseq no change, RNAseq up
C7_04160W_A	peak_6115	Promoter (<=1kb)	NA	3643127	0.4943	0.081165	1.858	0	no change	up	no: ATACseq no change, RNAseq up
C6_02110W_A	peak_5337	Promoter (<=1kb)	NA	3647553	0.494093	0.250626	0.974	0	no change	up	no: ATACseq no change, RNAseq up
C1_13270W_A	peak_1459	Promoter (<=1kb)	NA	3636144	0.493709	0.0286849	1.755	0	up	up	same: up
CR_03160W_A	peak_6531	Promoter (<=1kb)	NA	3645117	0.493259	0.144065	-0.771	0.002	no change	down	no: ATACseq no change, RNAseq down
CR_09620C_A	peak_7375	Promoter (<=1kb)	NA	6335435	0.492763	0.0433134	-0.972	0.007	up	down	no: ATACseq up, RNAseq down
C5_01960C_A	peak_4722	Promoter (<=1kb)	NA	3643738	0.492346	0.0814711	-0.74	0.002	no change	down	no: ATACseq no change, RNAseq down
C3_05090C_A	peak_3344	Promoter (<=1kb)	NA	3635245	0.492214	0.157197	0.903	0.007	no change	up	no: ATACseq no change, RNAseq up
C2_04960C_A	peak_2181	Promoter (<=1kb)	NA	3643442	0.491308	0.00998646	-1.364	0	up	down	no: ATACseq up, RNAseq down
C1_01130W_A	peak_153	Exon (C1_01130W_A/C1_01130W_A, exon 1 of 1)	NA	3640178	0.260342	0.589639	-0.178	0.466	no change	no change	same: no change
C1_13870W_A	peak_1530	Exon (C1_13870W_A/C1_13870W_A, exon 1 of 1)	MET3	3636132	-0.144409	0.740522	-1.967	0	no change	down	no: ATACseq no change, RNAseq down
C1_13880C_A	peak_1531	Exon (C1_13880C_A/C1_13880C_A, exon 1 of 1)	NA	3636133	-0.632312	0.049446	-0.202	0.405	down	no change	no: ATACseq down, RNAseq no change
C1_13880C_A	peak_1532	5' UTR	NA	3636133	-0.0589696	0.919831	-0.202	0.405	no change	no change	same: no change
C6_01900C_A	peak_5312	Promoter (<=1kb)	DOG1	3641597	0.490554	0.0233343	0.223	0.35	up	no change	no: ATACseq up, RNAseq no change
CR_09120C_A	peak_7307	Promoter (<=1kb)	TUB1	3641930	0.490379	0.26524	0.218	0.397	no change	no change	same: no change
C3_07330W_A	peak_3654	Promoter (<=1kb)	NA	3638478	0.490326	0.10294	2.74	0	no change	up	no: ATACseq no change, RNAseq up
C4_01800W_A	peak_3943	Promoter (<=1kb)	NA	3635595	0.490169	0.0349248	7.475	0	up	up	same: up
C1_01140C_A	peak_154	Downstream (<1kb)	NA	3640202	1.267	0.000731579	1.995	0	up	up	same: up
C1_13910C_A	peak_1540	Exon (C1_13910C_A/C1_13910C_A, exon 1 of 1)	MODF	3636182	-0.69148	0.125653	0.733	0.006	no change	up	no: ATACseq no change, RNAseq up
C4_03420C_A	peak_4100	Promoter (<=1kb)	NA	NA	0.488706	0.121504	-1.8	0	no change	down	no: ATACseq no change, RNAseq down
C3_03870C_A	peak_3202	Promoter (<=1kb)	SAP9	3645625	0.486997	0.00769226	1.1	0	up	up	same: up
C6_03790C_A	peak_5504	Promoter (1-2kb)	HGT10	3640309	0.486681	0.00813285	-1.39	0	up	down	no: ATACseq up, RNAseq down
C1_13930W_A	peak_1544	Distal Intergenic	SSK1	3636184	0.402371	0.163148	0.473	0.032	no change	up	no: ATACseq no change, RNAseq up
C1_13930W_A	peak_1545	Distal Intergenic	SSK1	3636184	0.333841	0.0492733	0.473	0.032	up	up	same: up
C1_13940W_A	peak_1546	Distal Intergenic	SIM1	3636185	0.656548	0.052077	-2.06	0	no change	down	no: ATACseq no change, RNAseq down
C1_13940W_A	peak_1547	Distal Intergenic	SIM1	3636185	0.835049	0.0307113	-2.06	0	up	down	no: ATACseq up, RNAseq down
C1_10230C_A	peak_1135	Promoter (<=1kb)	NA	3634880	0.48578	0.274183	1.624	0	no change	up	no: ATACseq no change, RNAseq up
C5_01830C_A	peak_4711	Promoter (<=1kb)	HAL9	3643757	0.4844	0.0151941	-0.161	0.482	up	no change	no: ATACseq up, RNAseq no change
C1_01140C_A	peak_155	Exon (C1_01140C_A/C1_01140C_A, exon 1 of 1)	NA	3640202	0.891638	0.0077328	1.995	0	up	up	same: up
C4_02410C_A	peak_4002	Promoter (<=1kb)	AHP1	3637850	0.484359	0.0078396	3.143	0	up	up	same: up
C1_13940W_A	peak_1551	Exon (C1_13940W_A/C1_13940W_A, exon 1 of 1)	SIM1	3636185	-0.253405	0.444331	-2.06	0	no change	down	no: ATACseq no change, RNAseq down
C1_13940W_A	peak_1552	Exon (C1_13940W_A/C1_13940W_A, exon 1 of 1)	SIM1	3636185	-0.411175	0.116283	-2.06	0	no change	down	no: ATACseq no change, RNAseq down
C1_13940W_A	peak_1553	Exon (C1_13940W_A/C1_13940W_A, exon 1 of 1)	SIM1	3636185	-0.487723	0.0975938	-2.06	0	no change	down	no: ATACseq no change, RNAseq down
C1_13950C_A	peak_1554	Exon (C1_13950C_A/C1_13950C_A, exon 1 of 1)	NA	3636186	-0.33177	0.347348	0.514	0.119	no change	no change	same: no change
CR_09160C_A	peak_7312	Promoter (<=1kb)	ERG13	3641881	0.483951	0.0381285	-1.449	0	up	down	no: ATACseq up, RNAseq down
C2_00780W_A	peak_1738	Promoter (<=1kb)	POT1-2	3638908	0.483495	0.0509761	1.556	0	no change	up	no: ATACseq no change, RNAseq up
C4_06250C_A	peak_4388	Promoter (<=1kb)	SEC3	3642806	0.481185	0.136711	0.692	0.005	no change	up	no: ATACseq no change, RNAseq up
C5_02700W_A	peak_4797	Promoter (<=1kb)	CTA7	3637776	0.480614	0.039593	1.005	0	up	up	same: up
C1_03400W_A	peak_411	Promoter (<=1kb)	NA	3636904	0.479331	0.0725203	-0.566	0.016	no change	down	no: ATACseq no change, RNAseq down
C1_01140C_A	peak_156	Exon (C1_01140C_A/C1_01140C_A, exon 1 of 1)	NA	3640202	1.06445	0.0371136	1.995	0	up	up	same: up
C1_09630W_A	peak_1068	Promoter (<=1kb)	IDH1	3634893	0.479044	0.0425647	-0.041	0.892	up	no change	no: ATACseq up, RNAseq no change
C1_14040W_A	peak_1561	Exon (C1_14040W_A/C1_14040W_A, exon 1 of 1)	APL1	3643342	0.138949	0.700715	1.102	0	no change	up	no: ATACseq no change, RNAseq up
C5_04680W_A	peak_4994	Promoter (<=1kb)	PSD2	3636515	0.47863	0.0594947	1.143	0	no change	up	no: ATACseq no change, RNAseq up
C2_02310W_A	peak_1903	Promoter (<=1kb)	NA	3635809	0.477424	0.11237	-1.143	0.003	no change	down	no: ATACseq no change, RNAseq down
C1_10710C_A	peak_1194	Promoter (<=1kb)	NA	3644407	0.477035	0.106784	1.262	0	no change	up	no: ATACseq no change, RNAseq up
C7_03130C_A	peak_6016	Promoter (<=1kb)	DFR1	3641348	0.476884	0.277484	0.402	0.129	no change	no change	same: no change
C1_14100W_A	peak_1566	Exon (C1_14100W_A/C1_14100W_A, exon 1 of 1)	YPT52	3643346	-0.39607	0.309024	0.699	0.001	no change	up	no: ATACseq no change, RNAseq up
C1_14110C_A	peak_1567	Exon (C1_14110C_A/C1_14110C_A, exon 1 of 1)	RPL4B	3643347	-0.382413	0.0761745	-1.299	0	no change	down	no: ATACseq no change, RNAseq down
C2_04940C_A	peak_2177	Promoter (<=1kb)	ITR1	3643440	0.476296	0.0308884	2.194	0	up	up	same: up
C1_04340C_A	peak_508	Promoter (<=1kb)	NA	3644685	0.475637	0.200032	-0.173	0.6	no change	no change	same: no change
C1_01140C_A	peak_157	Exon (C1_01140C_A/C1_01140C_A, exon 1 of 1)	NA	3640202	1.06758	0.00693623	1.995	0	up	up	same: up
C1_14120C_A	peak_1570	Exon (C1_14120C_A/C1_14120C_A, exon 1 of 1)	RBE1	3643317	-0.378359	0.097121	-3.729	0	no change	down	no: ATACseq no change, RNAseq down
C4_05150W_A	peak_4290	Promoter (<=1kb)	VAC8	3647410	0.473986	0.250515	0.209	0.468	no change	no change	same: no change
C2_04050C_A	peak_2095	Promoter (1-2kb)	DCK1	3637383	0.473641	0.0205386	-0.778	0.001	up	down	no: ATACseq up, RNAseq down
C1_13240W_A	peak_1453	Promoter (<=1kb)	NA	3636167	0.473543	0.030238	0.212	0.513	up	no change	no: ATACseq up, RNAseq no change
C3_00830C_A	peak_2915	Promoter (<=1kb)	NA	3647757	0.473303	0.185794	0.688	0.005	no change	up	no: ATACseq no change, RNAseq up
C1_12700W_A	peak_1397	Promoter (<=1kb)	NA	3646831	0.47326	0.190765	2.113	0	no change	up	no: ATACseq no change, RNAseq up
C6_03830W_A	peak_5510	Promoter (<=1kb)	SAL6	3640289	0.472928	0.0258885	1.223	0	up	up	same: up
C1_14140C_A	peak_1577	Exon (C1_14140C_A/C1_14140C_A, exon 1 of 1)	SET3	3643320	-0.158661	0.637405	-0.61	0.007	no change	down	no: ATACseq no change, RNAseq down
C1_14140C_A	peak_1578	Exon (C1_14140C_A/C1_14140C_A, exon 1 of 1)	SET3	3643320	-0.243375	0.445039	-0.61	0.007	no change	down	no: ATACseq no change, RNAseq down
C1_13250W_A	peak_1455	Promoter (<=1kb)	NA	3636143	0.472031	0.0159213	-0.446	0.095	up	no change	no: ATACseq up, RNAseq no change
C1_01140C_A	peak_158	Exon (C1_01140C_A/C1_01140C_A, exon 1 of 1)	NA	3640202	0.82231	0.157996	1.995	0	no change	up	no: ATACseq no change, RNAseq up
C1_13250W_A	peak_1456	Promoter (<=1kb)	NA	3636143	0.471439	0.0904758	-0.446	0.095	no change	no change	same: no change
CR_02610C_A	peak_6445	Promoter (<=1kb)	NA	3642566	0.471086	0.251739	-0.373	0.139	no change	no change	same: no change
C6_01290C_A	peak_5247	Promoter (<=1kb)	QDR3	3644023	0.470892	0.0381385	-0.275	0.296	up	no change	no: ATACseq up, RNAseq no change
C3_02470C_A	peak_3078	Promoter (<=1kb)	RPL9B	3638348	0.470845	0.0150362	-2.024	0	up	down	no: ATACseq up, RNAseq down
C6_03700W_A	peak_5489	Promoter (<=1kb)	ALS1	3640280	0.47048	0.0119876	2.266	0	up	up	same: up
C1_14210C_A	peak_1585	Exon (C1_14210C_A/C1_14210C_A, exon 1 of 1)	IML2	3643302	0.331436	0.331072	0.76	0.001	no change	up	no: ATACseq no change, RNAseq up
C3_07360W_A	peak_3657	Promoter (<=1kb)	DLD2	3638475	0.469669	0.0423916	0.726	0.006	up	up	same: up
C1_14220C_A	peak_1587	Exon (C1_14220C_A/C1_14220C_A, exon 1 of 1)	FTR2	3643303	0.0646119	0.904275	-3.014	0	no change	down	no: ATACseq no change, RNAseq down
C4_03940C_A	peak_4151	Promoter (<=1kb)	PYC2	3637323	0.469304	0.20325	0.881	0.006	no change	up	no: ATACseq no change, RNAseq up
C3_06850W_A	peak_3591	Promoter (<=1kb)	FCR1	3638542	0.469211	0.0161799	1.291	0	up	up	same: up
CR_05180C_A	peak_6709	Promoter (<=1kb)	SDH2	3646397	0.469156	0.0270094	-0.655	0.018	up	down	no: ATACseq up, RNAseq down
C1_00500C_A	peak_72	Promoter (<=1kb)	GLO1	3639312	0.468627	0.0461563	2.139	0.004	up	up	same: up
C2_00540W_A	peak_1717	Promoter (<=1kb)	NA	3638865	0.467535	0.0383388	2.767	0	up	up	same: up
C1_14230C_A	peak_1592	Exon (C1_14230C_A/C1_14230C_A, exon 1 of 1)	IRR1	3643305	-0.540449	0.101573	0.68	0.002	no change	up	no: ATACseq no change, RNAseq up
C1_14240W_A	peak_1593	Exon (C1_14250C_A/C1_14250C_A, exon 1 of 1)	NA	3643306	-0.184635	0.590894	-0.306	0.208	no change	no change	same: no change
C1_14250C_A	peak_1594	Exon (C1_14250C_A/C1_14250C_A, exon 1 of 1)	NA	3643307	-0.376889	0.194661	1.2	0	no change	up	no: ATACseq no change, RNAseq up
C2_10560C_A	peak_2763	Promoter (<=1kb)	ZSF1	3641257	0.465611	0.0206291	0.428	0.156	up	no change	no: ATACseq up, RNAseq no change
C2_06890C_A	peak_2396	Promoter (<=1kb)	NA	3643522	0.465402	0.0975888	5.73	0	no change	up	no: ATACseq no change, RNAseq up
C1_14280C_A	peak_1597	Exon (C1_14280C_A/C1_14280C_A, exon 1 of 1)	NPL3	3643310	-0.239351	0.445246	-0.824	0.005	no change	down	no: ATACseq no change, RNAseq down
C3_00060W_A	peak_2818	Promoter (<=1kb)	TLO7	3640569	0.464172	0.265411	1.627	0	no change	up	no: ATACseq no change, RNAseq up
C6_02800W_A	peak_5402	Promoter (<=1kb)	NA	3639246	0.462844	0.383534	0.758	0	no change	up	no: ATACseq no change, RNAseq up
C1_00140W_A	peak_16	Exon (C1_00140W_A/C1_00140W_A, exon 1 of 1)	KEL1	3639318	-0.125848	0.644447	-0.16	0.628	no change	no change	same: no change
C1_01150C_A	peak_160	Exon (C1_01150C_A/C1_01150C_A, exon 1 of 1)	NA	3640203	0.177203	0.664366	-2.771	0	no change	down	no: ATACseq no change, RNAseq down
C1_14290C_A	peak_1600	Exon (C1_14290C_A/C1_14290C_A, exon 2 of 2)	MDG1	3643311	-0.237188	0.445246	-1.041	0	no change	down	no: ATACseq no change, RNAseq down
C4_04760C_A	peak_4246	Promoter (<=1kb)	NA	3641118	0.462052	0.104867	-0.621	0.009	no change	down	no: ATACseq no change, RNAseq down
C1_09840C_A	peak_1087	Promoter (<=1kb)	NA	3634848	0.461895	0.235667	1.167	0	no change	up	no: ATACseq no change, RNAseq up
C1_12450C_A	peak_1374	Promoter (<=1kb)	IRA2	3642011	0.461418	0.0309412	-0.593	0.025	up	down	no: ATACseq up, RNAseq down
C1_14310W_A	peak_1604	Exon (C1_14310W_A/C1_14310W_A, exon 1 of 1)	NA	3643315	0.642151	0.0443873	1.207	0	up	up	same: up
C1_14320C_A	peak_1605	Exon (C1_14320C_A/C1_14320C_A, exon 1 of 1)	NA	3643316	0.178184	0.671461	2.358	0	no change	up	no: ATACseq no change, RNAseq up
C1_10010C_A	peak_1103	Promoter (<=1kb)	SWE1	3634866	0.461246	0.0418588	-1.372	0	up	down	no: ATACseq up, RNAseq down
C1_14330W_A	peak_1607	Exon (C1_14330W_A/C1_14330W_A, exon 1 of 1)	NA	3643278	-0.422532	0.0476127	0.299	0.204	down	no change	no: ATACseq down, RNAseq no change
C1_14340C_A	peak_1608	Exon (C1_14340C_A/C1_14340C_A, exon 1 of 1)	RIM101	3643280	-0.0992767	0.749036	-0.05	0.901	no change	no change	same: no change
C1_14340C_A	peak_1609	Exon (C1_14340C_A/C1_14340C_A, exon 1 of 1)	RIM101	3643280	-0.219948	0.460298	-0.05	0.901	no change	no change	same: no change
C4_03420C_A	peak_4102	Promoter (1-2kb)	NA	NA	0.45971	0.216764	-1.8	0	no change	down	no: ATACseq no change, RNAseq down
C5_04640C_A	peak_4990	Promoter (<=1kb)	NA	3636397	0.459011	0.0388071	0.292	0.315	up	no change	no: ATACseq up, RNAseq no change
C1_09690W_A	peak_1076	Promoter (1-2kb)	MLS1	3634875	0.458309	0.301911	5.477	0	no change	up	no: ATACseq no change, RNAseq up
C3_00860W_A	peak_2917	Promoter (<=1kb)	CSE4	3647750	0.455759	0.0104048	-1.763	0	up	down	no: ATACseq up, RNAseq down
C1_14350W_A	peak_1613	Exon (C1_14350W_A/C1_14350W_A, exon 1 of 1)	NA	3643281	-0.787778	0.0297097	2.203	0	down	up	no: ATACseq down, RNAseq up
C1_14350W_A	peak_1614	Exon (C1_14360C_A/C1_14360C_A, exon 1 of 1)	NA	3643281	-0.202856	0.398019	2.203	0	no change	up	no: ATACseq no change, RNAseq up
C1_14360C_A	peak_1615	Exon (C1_14360C_A/C1_14360C_A, exon 1 of 1)	WSC4	3643282	-0.332361	0.104042	-1.1	0	no change	down	no: ATACseq no change, RNAseq down
CR_00780C_A	peak_6267	Promoter (<=1kb)	GSY1	3640435	0.455297	0.00819484	1.166	0	up	up	same: up
CR_04730W_A	peak_6667	Promoter (<=1kb)	NA	3647305	0.455246	0.189317	-0.436	0.114	no change	no change	same: no change
C1_14390W_A	peak_1620	Exon (C1_14400C_A/C1_14400C_A, exon 1 of 1)	RPC10	3643292	0.0318269	0.928258	-0.272	0.504	no change	no change	same: no change
C5_00880C_A	peak_4620	Promoter (<=1kb)	GIT3	3642634	0.454963	0.0103938	1.22	0	up	up	same: up
C1_05160C_A	peak_603	Promoter (<=1kb)	NA	3642468	0.454901	0.417589	3.383	0	no change	up	no: ATACseq no change, RNAseq up
C1_14420W_A	peak_1623	Exon (C1_14420W_A/C1_14420W_A, exon 1 of 1)	DDI1	3643295	-0.514785	0.150225	2.3	0	no change	up	no: ATACseq no change, RNAseq up
C1_14420W_A	peak_1624	Exon (C1_14420W_A/C1_14420W_A, exon 1 of 1)	DDI1	3643295	-0.189415	0.496973	2.3	0	no change	up	no: ATACseq no change, RNAseq up
C1_14430C_A	peak_1625	Exon (C1_14430C_A/C1_14430C_A, exon 1 of 1)	NA	3643297	-0.0061386	0.983741	1.298	0.001	no change	up	no: ATACseq no change, RNAseq up
C1_14430C_A	peak_1626	Exon (C1_14430C_A/C1_14430C_A, exon 1 of 1)	NA	3643297	-0.0282381	0.920344	1.298	0.001	no change	up	no: ATACseq no change, RNAseq up
C4_04050C_A	peak_4168	Promoter (<=1kb)	RHD3	3641212	0.453877	0.0266281	2.633	0	up	up	same: up
C6_00790C_A	peak_5185	Promoter (<=1kb)	CTR1	3647077	0.453257	0.0431582	-1.795	0	up	down	no: ATACseq up, RNAseq down
C1_14440C_A	peak_1629	Exon (C1_14440C_A/C1_14440C_A, exon 1 of 1)	GDI1	3643298	0.238504	0.388036	0.255	0.452	no change	no change	same: no change
C3_03460C_A	peak_3164	Promoter (<=1kb)	NA	3638359	0.452796	0.0258608	2.05	0	up	up	same: up
C1_09140C_A	peak_1013	Promoter (1-2kb)	SSU81	3634944	0.452419	0.0455087	-0.539	0.016	up	down	no: ATACseq up, RNAseq down
C1_14450C_A	peak_1631	Exon (C1_14450C_A/C1_14450C_A, exon 1 of 1)	NA	3643299	-0.322187	0.195191	0.728	0.064	no change	no change	same: no change
C1_14450C_A	peak_1632	Exon (C1_14450C_A/C1_14450C_A, exon 1 of 1)	NA	3643299	-0.338092	0.0991214	0.728	0.064	no change	no change	same: no change
C3_05910W_A	peak_3467	Promoter (<=1kb)	ZCF35	3641740	0.451969	0.0325941	-0.8	0	up	down	no: ATACseq up, RNAseq down
C1_14460W_A	peak_1634	Exon (C1_14460W_A/C1_14460W_A, exon 1 of 1)	NA	3643326	-0.21578	0.578566	1.649	0	no change	up	no: ATACseq no change, RNAseq up
C1_14460W_A	peak_1635	Exon (C1_14460W_A/C1_14460W_A, exon 1 of 1)	NA	3643326	-0.19867	0.454068	1.649	0	no change	up	no: ATACseq no change, RNAseq up
C3_06280W_A	peak_3510	Promoter (<=1kb)	NA	3642238	0.451927	0.22378	0.935	0	no change	up	no: ATACseq no change, RNAseq up
C1_14470W_A	peak_1637	Exon (C1_14470W_A/C1_14470W_A, exon 1 of 1)	NA	3643327	-0.0950988	0.739003	1.526	0	no change	up	no: ATACseq no change, RNAseq up
CR_10190C_A	peak_7447	Promoter (<=1kb)	NA	3638918	0.451763	0.0760977	1.138	0	no change	up	no: ATACseq no change, RNAseq up
C1_14480W_A	peak_1639	Exon (C1_14480W_A/C1_14480W_A, exon 1 of 1)	NA	3643328	0.0828916	0.796089	1.61	0.003	no change	up	no: ATACseq no change, RNAseq up
C2_08870C_A	peak_2563	Promoter (<=1kb)	PIR1	3645801	0.451291	0.00929704	-0.244	0.423	up	no change	no: ATACseq up, RNAseq no change
C1_14490C_A	peak_1640	Exon (C1_14490C_A/C1_14490C_A, exon 1 of 1)	SAM35	3643329	0.0251653	0.939223	2.29	0	no change	up	no: ATACseq no change, RNAseq up
CR_04500C_A	peak_6651	Promoter (<=1kb)	NA	3641014	0.450879	0.113661	0.597	0.016	no change	up	no: ATACseq no change, RNAseq up
C3_03370C_A	peak_3152	Promoter (1-2kb)	NA	3638366	0.450498	0.297164	-0.247	0.512	no change	no change	same: no change
C1_14520W_A	peak_1643	5' UTR	NA	3643332	-0.31628	0.0991911	-1.124	0.033	no change	down	no: ATACseq no change, RNAseq down
C2_09600C_A	peak_2660	Promoter (<=1kb)	NA	3643799	0.450238	0.309944	0.879	0.032	no change	up	no: ATACseq no change, RNAseq up
C1_05190C_A	peak_607	Promoter (<=1kb)	NA	30514991	0.449544	0.174338	-0.922	0	no change	down	no: ATACseq no change, RNAseq down
C1_14530W_A	peak_1646	Downstream (<1kb)	NA	3643333	0.154747	0.57181	1.522	0	no change	up	no: ATACseq no change, RNAseq up
C1_13690C_A	peak_1506	Promoter (<=1kb)	NA	30515076	0.448789	0.0263235	1.021	0	up	up	same: up
C6_01360W_A	peak_5251	Promoter (<=1kb)	NA	3641608	0.448493	0.0180484	2.862	0	up	up	same: up
C1_14560C_A	peak_1649	Exon (C1_14560C_A/C1_14560C_A, exon 1 of 1)	NA	3648376	0.20408	0.421726	1.412	0	no change	up	no: ATACseq no change, RNAseq up
C1_11120C_A	peak_1234	Promoter (<=1kb)	NA	3644412	0.447693	0.238726	-0.113	0.675	no change	no change	same: no change
C5_04720C_A	peak_4998	Promoter (<=1kb)	NA	3636518	0.446945	0.194661	-1.686	0	no change	down	no: ATACseq no change, RNAseq down
C2_00010W_A	peak_1651	Distal Intergenic	TLO5	3647926	-0.0200711	0.961727	1.145	0	no change	up	no: ATACseq no change, RNAseq up
C2_00010W_A	peak_1652	Distal Intergenic	TLO5	3647926	0.382145	0.32616	1.145	0	no change	up	no: ATACseq no change, RNAseq up
C1_08060W_A	peak_901	Promoter (<=1kb)	OFR1	3640710	0.446618	0.119666	0.008	0.984	no change	no change	same: no change
C2_04370W_A	peak_2125	Promoter (<=1kb)	NA	3645460	0.446504	0.0675579	-2.104	0	no change	down	no: ATACseq no change, RNAseq down
C1_11850W_A	peak_1315	Promoter (<=1kb)	NA	3642010	0.445912	0.0112686	4.613	0	up	up	same: up
C2_00030W_A	peak_1656	Exon (C2_00030W_A/C2_00030W_A, exon 1 of 1)	RRN3	3647925	-0.475671	0.049996	-1.436	0	down	down	same: down
C2_00040C_A	peak_1657	Exon (C2_00030W_A/C2_00030W_A, exon 1 of 1)	tV(CAC)1	30515081	-0.24597	0.440461	-0.202	0.818	no change	no change	same: no change
C2_00040C_A	peak_1658	Exon (C2_00030W_A/C2_00030W_A, exon 1 of 1)	tV(CAC)1	30515081	-0.374098	0.217448	-0.202	0.818	no change	no change	same: no change
CR_04820W_A	peak_6675	Promoter (<=1kb)	NA	3647298	0.445592	0.0180484	5.385	0	up	up	same: up
C7_02860C_A	peak_6002	Promoter (<=1kb)	NA	3641397	0.445425	0.107643	1.019	0	no change	up	no: ATACseq no change, RNAseq up
C2_00060C_A	peak_1661	Exon (C2_00060C_A/C2_00060C_A, exon 1 of 1)	NA	3647914	-0.0905324	0.787549	-0.081	0.873	no change	no change	same: no change
C3_01320C_A	peak_2972	Promoter (<=1kb)	SGA1	3636652	0.445083	0.125047	0.199	0.539	no change	no change	same: no change
C2_09010W_A	peak_2583	Promoter (<=1kb)	STB3	3645781	0.444358	0.0180484	1.723	0	up	up	same: up
C1_06840C_A	peak_755	Promoter (<=1kb)	NA	30515012	0.444001	0.0841879	0.656	0.022	no change	up	no: ATACseq no change, RNAseq up
C2_00080C_A	peak_1665	Exon (C2_00080C_A/C2_00080C_A, exon 1 of 1)	FAV3	3647911	-0.23547	0.470812	-0.702	0.01	no change	down	no: ATACseq no change, RNAseq down
C1_06300W_A	peak_701	Promoter (1-2kb)	NA	30515004	0.443685	0.434479	0.182	0.825	no change	no change	same: no change
C2_00090W_A	peak_1667	Exon (C2_00090W_A/C2_00090W_A, exon 1 of 1)	NA	3647910	-0.332385	0.174044	-0.437	0.23	no change	no change	same: no change
C2_00100C_A	peak_1668	Exon (C2_00100C_A/C2_00100C_A, exon 1 of 1)	PGA52	3647908	-0.299864	0.19255	-0.534	0.058	no change	no change	same: no change
C4_00960W_A	peak_3852	Promoter (<=1kb)	PTC8	3635674	0.443297	0.0273423	-1.263	0.001	up	down	no: ATACseq up, RNAseq down
C1_11280W_A	peak_1250	Promoter (<=1kb)	NA	3644554	0.442879	0.0296477	0.82	0.001	up	up	same: up
C2_00110W_A	peak_1670	Exon (C2_00110W_A/C2_00110W_A, exon 1 of 1)	NA	3647921	-0.306191	0.227143	-0.415	0.144	no change	no change	same: no change
C2_00110W_A	peak_1671	Exon (C2_00120C_A/C2_00120C_A, exon 1 of 1)	NA	3647921	-0.58742	0.0423532	-0.415	0.144	down	no change	no: ATACseq down, RNAseq no change
C2_00120C_A	peak_1672	Exon (C2_00120C_A/C2_00120C_A, exon 1 of 1)	EMC9	3647918	-0.0680255	0.855777	0.104	0.727	no change	no change	same: no change
C7_00300W_A	peak_5724	Promoter (<=1kb)	NA	3638046	0.442773	0.121054	0.1	0.693	no change	no change	same: no change
C2_00140W_A	peak_1676	5' UTR	NDT80	3638840	-0.277095	0.282474	-1.879	0	no change	down	no: ATACseq no change, RNAseq down
C2_00140W_A	peak_1677	Exon (C2_00140W_A/C2_00140W_A, exon 1 of 1)	NDT80	3638840	-0.369739	0.131097	-1.879	0	no change	down	no: ATACseq no change, RNAseq down
C7_00760C_A	peak_5781	Promoter (<=1kb)	NA	3637960	0.440118	0.0156655	3.029	0	up	up	same: up
CR_06120W_A	peak_6826	Promoter (<=1kb)	RPL7	6335362	0.439973	0.169561	-3.092	0	no change	down	no: ATACseq no change, RNAseq down
C7_01710W_A	peak_5881	Promoter (<=1kb)	NA	3637012	0.439955	0.291088	0.51	0.085	no change	no change	same: no change
C2_00170C_A	peak_1680	Exon (C2_00170C_A/C2_00170C_A, exon 1 of 1)	HMA1	3638906	-0.121533	0.746184	-3.839	0	no change	down	no: ATACseq no change, RNAseq down
C3_00300W_A	peak_2848	Promoter (<=1kb)	NA	3640524	0.43895	0.271585	0.191	0.4	no change	no change	same: no change
C4_03430W_A	peak_4103	Promoter (1-2kb)	MOH1	3646809	0.438601	0.0810221	4.81	0	no change	up	no: ATACseq no change, RNAseq up
C1_13860C_A	peak_1524	Promoter (<=1kb)	GND1	3636131	0.438292	0.0211645	1.251	0	up	up	same: up
C1_05510C_A	peak_628	Promoter (<=1kb)	RPS27A	30514993	0.437704	0.173329	2.644	0	no change	up	no: ATACseq no change, RNAseq up
C2_03150C_A	peak_1989	Promoter (<=1kb)	NA	3642990	0.437225	0.133289	0.404	0.112	no change	no change	same: no change
C2_00230W_A	peak_1686	Exon (C2_00230W_A/C2_00230W_A, exon 1 of 1)	NA	3638901	0.310104	0.381247	0.92	0.002	no change	up	no: ATACseq no change, RNAseq up
C2_00240C_A	peak_1687	Exon (C2_00230W_A/C2_00230W_A, exon 1 of 1)	SOD6	3638899	0.513466	0.0360549	1.499	0	up	up	same: up
C2_00240C_A	peak_1688	Exon (C2_00240C_A/C2_00240C_A, exon 1 of 1)	SOD6	3638899	0.0513906	0.874537	1.499	0	no change	up	no: ATACseq no change, RNAseq up
C6_03710W_A	peak_5496	Promoter (<=1kb)	ALS9	3640281	0.437147	0.0285457	0.664	0.032	up	up	same: up
C7_01150W_A	peak_5826	Promoter (<=1kb)	NA	3645913	0.434894	0.0274935	4.555	0	up	up	same: up
C2_00260C_A	peak_1690	Exon (C2_00260C_A/C2_00260C_A, exon 2 of 2)	MUQ1	3638898	0.0198956	0.958242	2.344	0	no change	up	no: ATACseq no change, RNAseq up
C3_07440W_A	peak_3665	Promoter (<=1kb)	TPI1	3638482	0.434569	0.0143651	1.027	0.007	up	up	same: up
C2_00270C_A	peak_1692	Exon (C2_00270C_A/C2_00270C_A, exon 1 of 1)	NA	3638803	-0.215354	0.571859	2.136	0	no change	up	no: ATACseq no change, RNAseq up
C2_00290W_A	peak_1693	Exon (C2_00290W_A/C2_00290W_A, exon 1 of 1)	NA	3638801	0.570021	0.108569	2.658	0	no change	up	no: ATACseq no change, RNAseq up
C4_06710W_A	peak_4436	Promoter (<=1kb)	NA	3642948	0.43435	0.0695463	4.144	0	no change	up	no: ATACseq no change, RNAseq up
C5_00380W_A	peak_4558	Promoter (<=1kb)	NA	3641553	0.434275	0.0476689	-0.666	0.16	up	no change	no: ATACseq up, RNAseq no change
C3_06700C_A	peak_3571	Promoter (1-2kb)	NA	3642247	0.434195	0.323921	0.064	0.836	no change	no change	same: no change
C3_07670W_A	peak_3706	Promoter (<=1kb)	NA	3638460	0.433649	0.282738	-1.019	0	no change	down	no: ATACseq no change, RNAseq down
CR_01990C_A	peak_6372	Promoter (<=1kb)	SPC98	3640113	0.433164	0.345009	-1.072	0	no change	down	no: ATACseq no change, RNAseq down
C6_03770C_A	peak_5500	Promoter (<=1kb)	ORM1	3640307	0.433153	0.0170713	1.646	0	up	up	same: up
C1_00140W_A	peak_17	Exon (C1_00140W_A/C1_00140W_A, exon 1 of 1)	KEL1	3639318	-0.075705	0.874537	-0.16	0.628	no change	no change	same: no change
C3_05230W_A	peak_3377	Promoter (<=1kb)	SAP3	3635197	0.432534	0.0760824	-0.3	0.549	no change	no change	same: no change
C2_00380C_A	peak_1700	Exon (C2_00380C_A/C2_00380C_A, exon 1 of 1)	RFA1	3638823	-0.419535	0.391221	1.218	0	no change	up	no: ATACseq no change, RNAseq up
C2_05690C_A	peak_2267	Promoter (<=1kb)	YTH1	3645572	0.432306	0.0160319	1.825	0	up	up	same: up
C1_08430W_A	peak_946	Promoter (<=1kb)	CAF16	3646486	0.4322	0.0641248	2.01	0	no change	up	no: ATACseq no change, RNAseq up
C6_03480W_A	peak_5463	Promoter (<=1kb)	YMX6	3640255	0.431992	0.0330156	3.272	0	up	up	same: up
C7_01810W_A	peak_5895	Promoter (<=1kb)	RVB2	3637055	0.43037	0.0376994	-0.237	0.343	up	no change	no: ATACseq up, RNAseq no change
C3_07280C_A	peak_3645	Promoter (<=1kb)	NA	3638431	0.429899	0.0159099	1.638	0	up	up	same: up
C2_00450C_A	peak_1706	Exon (C2_00450C_A/C2_00450C_A, exon 1 of 1)	CDH1	3638814	-0.518816	0.10112	0.5	0.023	no change	up	no: ATACseq no change, RNAseq up
CR_06550C_A	peak_6874	Promoter (<=1kb)	NA	3645260	0.428787	0.119398	2.032	0	no change	up	no: ATACseq no change, RNAseq up
C3_00310C_A	peak_2850	Promoter (<=1kb)	NA	3640523	0.428781	0.0227551	2.262	0	up	up	same: up
C4_05150W_A	peak_4292	Promoter (<=1kb)	VAC8	3647410	0.42873	0.329916	0.209	0.468	no change	no change	same: no change
C2_01600C_A	peak_1820	Promoter (<=1kb)	CDC55	3635785	0.428721	0.0170133	1.054	0	up	up	same: up
C2_02920W_A	peak_1951	Promoter (<=1kb)	NA	3643016	0.428242	0.0176895	3.721	0	up	up	same: up
C4_00340W_A	peak_3787	Promoter (<=1kb)	PTC7	3645000	0.42772	0.0639242	-0.069	0.78	no change	no change	same: no change
C7_03260C_A	peak_6031	Promoter (<=1kb)	NA	3641366	0.427374	0.0691849	0.766	0.004	no change	up	no: ATACseq no change, RNAseq up
C5_04360C_A	peak_4970	Promoter (<=1kb)	NA	3636483	0.427128	0.0803068	2.212	0	no change	up	no: ATACseq no change, RNAseq up
C1_07170C_A	peak_798	Promoter (<=1kb)	ZCF23	3644477	0.425775	0.428447	-0.494	0.116	no change	no change	same: no change
C1_14250C_A	peak_1595	Promoter (<=1kb)	NA	3643307	0.4257	0.109446	1.2	0	no change	up	no: ATACseq no change, RNAseq up
C1_00660C_A	peak_87	Promoter (<=1kb)	NA	3639376	0.425402	0.268228	1.081	0	no change	up	no: ATACseq no change, RNAseq up
C5_02280C_A	peak_4760	Promoter (<=1kb)	NA	3637712	0.423706	0.207495	-0.708	0.003	no change	down	no: ATACseq no change, RNAseq down
C3_04330C_A	peak_3255	Promoter (<=1kb)	NA	3635272	0.423693	0.0512384	3.238	0	no change	up	no: ATACseq no change, RNAseq up
CR_01580C_A	peak_6341	Promoter (<=1kb)	DOT6	3640078	0.422311	0.0538393	-1.928	0	no change	down	no: ATACseq no change, RNAseq down
C4_02750W_A	peak_4044	Promoter (<=1kb)	HIT1	3637854	0.421483	0.00998646	-2.619	0	up	down	no: ATACseq up, RNAseq down
C3_04090W_A	peak_3237	Promoter (<=1kb)	SBP1	3635280	0.421297	0.012896	0.185	0.505	up	no change	no: ATACseq up, RNAseq no change
C1_08860C_A	peak_975	Promoter (<=1kb)	NA	3634921	0.420862	0.181717	0.217	0.327	no change	no change	same: no change
C3_06320W_A	peak_3518	Promoter (<=1kb)	ALS7	3642234	0.420754	0.0710104	1.625	0	no change	up	no: ATACseq no change, RNAseq up
CR_05720W_A	peak_6775	Promoter (<=1kb)	TPS1	3646699	0.420534	0.0474854	1.387	0	up	up	same: up
C3_00750W_A	peak_2903	Promoter (<=1kb)	LYS144	3640512	0.42015	0.200002	-0.047	0.867	no change	no change	same: no change
CR_09840C_A	peak_7400	Promoter (<=1kb)	NA	3638988	0.419734	0.223445	-0.292	0.281	no change	no change	same: no change
CR_02130W_A	peak_6391	Promoter (<=1kb)	ECM4	3640144	0.419615	0.049446	2.439	0	up	up	same: up
C5_00580W_A	peak_4590	Promoter (<=1kb)	NA	3641588	0.419084	0.139299	1.775	0	no change	up	no: ATACseq no change, RNAseq up
C1_02070W_A	peak_258	Promoter (<=1kb)	HSP31	3644589	0.418559	0.155278	-0.086	1	no change	no change	same: no change
C6_02320C_A	peak_5355	Promoter (<=1kb)	IPL1	3645876	0.418003	0.152906	1.31	0	no change	up	no: ATACseq no change, RNAseq up
C3_04080W_A	peak_3235	Promoter (<=1kb)	NA	30515200	0.417877	0.147789	-1.019	0	no change	down	no: ATACseq no change, RNAseq down
C1_05330C_A	peak_619	Promoter (<=1kb)	NA	3642485	0.417249	0.237567	2.401	0	no change	up	no: ATACseq no change, RNAseq up
CR_09930W_A	peak_7417	Promoter (<=1kb)	NA	3639029	0.416346	0.254601	2.092	0	no change	up	no: ATACseq no change, RNAseq up
CR_03130W_A	peak_6529	Promoter (<=1kb)	NA	3645121	0.416201	0.321842	1.121	0	no change	up	no: ATACseq no change, RNAseq up
C3_04110C_A	peak_3239	Promoter (<=1kb)	MBP1	3635281	0.413249	0.0721176	0.043	0.871	no change	no change	same: no change
C3_04110C_A	peak_3240	Promoter (<=1kb)	MBP1	3635281	0.413226	0.0834405	0.043	0.871	no change	no change	same: no change
C2_10850C_A	peak_2802	Promoter (<=1kb)	NA	3641232	0.412936	0.332987	1.002	0.007	no change	up	no: ATACseq no change, RNAseq up
CR_10570C_A	peak_7498	Promoter (<=1kb)	YHB4	3638999	0.412873	0.050174	0.73	0.004	no change	up	no: ATACseq no change, RNAseq up
C2_00780W_A	peak_1739	Exon (C2_00780W_A/C2_00780W_A, exon 1 of 1)	POT1-2	3638908	-0.370844	0.257114	1.556	0	no change	up	no: ATACseq no change, RNAseq up
C4_05310W_A	peak_4301	Promoter (<=1kb)	NA	3646958	0.411379	0.351706	-1.052	0.006	no change	down	no: ATACseq no change, RNAseq down
C2_00960C_A	peak_1751	Promoter (<=1kb)	MXR1	3638881	0.410925	0.35016	2.381	0	no change	up	no: ATACseq no change, RNAseq up
C3_03200C_A	peak_3134	Promoter (<=1kb)	NA	3638428	0.410591	0.203668	-0.257	0.402	no change	no change	same: no change
C2_04230W_A	peak_2111	Promoter (<=1kb)	BAT21	3637356	0.410529	0.0879049	1.237	0	no change	up	no: ATACseq no change, RNAseq up
C3_00850C_A	peak_2916	Promoter (<=1kb)	NA	3647748	0.409697	0.0311463	0.716	0.065	up	no change	no: ATACseq up, RNAseq no change
C3_06720W_A	peak_3573	Promoter (<=1kb)	PRP5	3638447	0.409423	0.320824	-1.323	0	no change	down	no: ATACseq no change, RNAseq down
CR_02570C_A	peak_6443	Promoter (<=1kb)	NA	3647685	0.409402	0.0591746	1.298	0	no change	up	no: ATACseq no change, RNAseq up
C5_00730W_A	peak_4607	Promoter (<=1kb)	HYR3	3644119	0.408755	0.0946427	0.814	0.002	no change	up	no: ATACseq no change, RNAseq up
C2_00940W_A	peak_1747	Exon (C2_00940W_A/C2_00940W_A, exon 1 of 1)	NA	3638891	-0.168195	0.537122	2.598	0	no change	up	no: ATACseq no change, RNAseq up
C2_00950C_A	peak_1748	Exon (C2_00950C_A/C2_00950C_A, exon 1 of 1)	RFC5	3638890	-0.237714	0.631771	0.519	0.015	no change	up	no: ATACseq no change, RNAseq up
C1_01320W_A	peak_171	Promoter (<=1kb)	MRS7	3640187	0.408562	0.0184886	0.51	0.069	up	no change	no: ATACseq up, RNAseq no change
C1_13870W_A	peak_1525	Promoter (1-2kb)	MET3	3636132	0.407184	0.266004	-1.967	0	no change	down	no: ATACseq no change, RNAseq down
CR_02990C_A	peak_6515	Promoter (<=1kb)	RIB1	3642607	0.40672	0.207171	2.327	0	no change	up	no: ATACseq no change, RNAseq up
C7_01070C_A	peak_5818	Promoter (<=1kb)	NA	3637949	0.406666	0.0528593	1.182	0	no change	up	no: ATACseq no change, RNAseq up
C2_00970C_A	peak_1752	Exon (C2_00970C_A/C2_00970C_A, exon 1 of 1)	UBP13	3638879	-0.0875837	0.854371	0.189	0.427	no change	no change	same: no change
CR_10200W_A	peak_7448	Promoter (<=1kb)	NA	3638919	0.406114	0.0626184	1.345	0	no change	up	no: ATACseq no change, RNAseq up
CR_09240C_A	peak_7325	Promoter (<=1kb)	NA	3641919	0.405516	0.0666079	-0.271	0.308	no change	no change	same: no change
C2_01010W_A	peak_1757	Exon (C2_01010W_A/C2_01010W_A, exon 1 of 1)	HGT8	3638875	0.00631606	0.986872	-0.021	0.946	no change	no change	same: no change
C2_01010W_A	peak_1758	Exon (C2_01010W_A/C2_01010W_A, exon 1 of 1)	HGT8	3638875	-0.466529	0.104445	-0.021	0.946	no change	no change	same: no change
C2_01010W_A	peak_1759	Exon (C2_01010W_A/C2_01010W_A, exon 1 of 1)	HGT8	3638875	-0.22017	0.532739	-0.021	0.946	no change	no change	same: no change
CR_07060C_A	peak_6925	Promoter (1-2kb)	CRZ2	3645725	0.40493	0.0452072	-0.626	0.137	up	no change	no: ATACseq up, RNAseq no change
C2_01010W_A	peak_1760	Exon (C2_01010W_A/C2_01010W_A, exon 1 of 1)	HGT8	3638875	0.0811329	0.855459	-0.021	0.946	no change	no change	same: no change
C2_01010W_A	peak_1761	Exon (C2_01010W_A/C2_01010W_A, exon 1 of 1)	HGT8	3638875	-0.0159761	0.962224	-0.021	0.946	no change	no change	same: no change
C1_10350C_A	peak_1151	Promoter (<=1kb)	NA	3634835	0.403485	0.0589746	0.342	0.184	no change	no change	same: no change
C1_04320W_A	peak_505	Promoter (<=1kb)	GPM2	3644713	0.402981	0.0376319	2.116	0	up	up	same: up
C6_00800C_A	peak_5187	Promoter (<=1kb)	NA	3647069	0.402687	0.0234108	1.916	0	up	up	same: up
C3_02610C_A	peak_3087	Promoter (<=1kb)	GLX3	3638325	0.401838	0.0234205	4.645	0	up	up	same: up
CR_04350C_A	peak_6643	Promoter (<=1kb)	NA	3641001	0.401312	0.129412	2.524	0	no change	up	no: ATACseq no change, RNAseq up
C1_01060W_A	peak_141	Promoter (<=1kb)	MBF1	3640171	0.401228	0.0800535	1.133	0	no change	up	no: ATACseq no change, RNAseq up
C2_01070W_A	peak_1768	5' UTR	NA	3638834	-0.295501	0.551537	-2.839	0	no change	down	no: ATACseq no change, RNAseq down
CR_06910W_A	peak_6907	Promoter (<=1kb)	BUD5	3647315	0.401023	0.504168	-1.135	0	no change	down	no: ATACseq no change, RNAseq down
CR_02460W_A	peak_6432	Promoter (<=1kb)	NA	3644922	0.400924	0.278185	0.863	0	no change	up	no: ATACseq no change, RNAseq up
CR_03920C_A	peak_6611	Promoter (<=1kb)	TPO4	3640956	0.400813	0.40252	1.655	0	no change	up	no: ATACseq no change, RNAseq up
CR_10760C_A	peak_7517	Promoter (<=1kb)	NA	3638943	0.400284	0.103956	-0.752	0.017	no change	down	no: ATACseq no change, RNAseq down
C1_09660W_A	peak_1073	Promoter (<=1kb)	DOA1	3634871	0.399873	0.074253	2.748	0	no change	up	no: ATACseq no change, RNAseq up
C1_09620C_A	peak_1067	Promoter (<=1kb)	NA	3634892	0.399756	0.243279	-0.097	0.72	no change	no change	same: no change
C3_06560W_A	peak_3555	Promoter (<=1kb)	NA	3642276	0.399557	0.089707	0.28	0.252	no change	no change	same: no change
C1_12030W_A	peak_1342	Promoter (<=1kb)	SER33	3642030	0.399254	0.28548	0.419	0.114	no change	no change	same: no change
C1_07920W_A	peak_879	Promoter (<=1kb)	NA	30515026	0.398986	0.323921	-0.802	0.002	no change	down	no: ATACseq no change, RNAseq down
C2_03070C_A	peak_1974	Promoter (<=1kb)	SMP3	3642980	0.398807	0.415668	-0.916	0	no change	down	no: ATACseq no change, RNAseq down
C1_02830W_A	peak_343	Promoter (<=1kb)	NA	3636876	0.398348	0.354813	0.217	0.356	no change	no change	same: no change
C3_07350W_A	peak_3656	Promoter (<=1kb)	NA	3638476	0.398327	0.099827	1.857	0	no change	up	no: ATACseq no change, RNAseq up
C1_01400C_A	peak_178	5' UTR	NA	3640237	-0.236379	0.489531	0.439	0.033	no change	up	no: ATACseq no change, RNAseq up
C2_05820W_A	peak_2281	Promoter (<=1kb)	NA	3647482	0.397517	0.0900502	-1.948	0	no change	down	no: ATACseq no change, RNAseq down
C2_09490W_A	peak_2643	Promoter (<=1kb)	PHO13	3643818	0.396819	0.148022	1.774	0	no change	up	no: ATACseq no change, RNAseq up
C4_01730C_A	peak_3937	Promoter (<=1kb)	NA	3635588	0.396296	0.288077	-0.823	0.001	no change	down	no: ATACseq no change, RNAseq down
CR_04060C_A	peak_6622	Promoter (<=1kb)	DAP1	3641021	0.395777	0.0408372	2.352	0	up	up	same: up
C6_03920W_A	peak_5524	Promoter (<=1kb)	SNF4	3640264	0.395643	0.100933	1.11	0	no change	up	no: ATACseq no change, RNAseq up
C1_02970W_A	peak_356	Promoter (<=1kb)	NA	3636835	0.395519	0.0695463	0.934	0	no change	up	no: ATACseq no change, RNAseq up
C1_03390W_A	peak_406	Promoter (<=1kb)	EHT1	3636894	0.394597	0.0682236	0.29	0.209	no change	no change	same: no change
C6_00920W_A	peak_5219	Promoter (<=1kb)	NA	3644031	0.394145	0.116825	1.567	0	no change	up	no: ATACseq no change, RNAseq up
C6_02030C_A	peak_5327	Promoter (<=1kb)	NA	3647562	0.393766	0.0296477	2.58	0	up	up	same: up
C1_05550C_A	peak_634	Promoter (<=1kb)	NA	30514994	0.392922	0.0545982	-1.25	0.017	no change	down	no: ATACseq no change, RNAseq down
C1_08980C_A	peak_992	Promoter (1-2kb)	ZWF1	3634913	0.391927	0.0381285	2.95	0	up	up	same: up
C2_01290C_A	peak_1790	Exon (C2_01290C_A/C2_01290C_A, exon 2 of 2)	tL(UAA)1	30515089	-0.74404	0.00396176	-1.75	0.022	down	down	same: down
CR_02920C_A	peak_6507	Promoter (1-2kb)	AQY1	3642587	0.391234	0.0334594	-0.556	0.463	up	no change	no: ATACseq up, RNAseq no change
C3_06700C_A	peak_3569	Promoter (<=1kb)	NA	3642247	0.39117	0.0413267	0.064	0.836	up	no change	no: ATACseq up, RNAseq no change
C2_02030W_A	peak_1874	Promoter (<=1kb)	ARO3	3635770	0.391114	0.0371527	0.662	0.014	up	up	same: up
CR_10240W_A	peak_7452	Promoter (<=1kb)	UTP5	3638922	0.390357	0.0982537	-3.049	0	no change	down	no: ATACseq no change, RNAseq down
C5_02180C_A	peak_4745	Promoter (<=1kb)	LEU3	3637757	0.389892	0.196253	-1.192	0	no change	down	no: ATACseq no change, RNAseq down
C2_10360C_A	peak_2735	Promoter (<=1kb)	HEM3	3643940	0.389861	0.360799	-1.031	0	no change	down	no: ATACseq no change, RNAseq down
C7_03260C_A	peak_6032	Promoter (<=1kb)	NA	3641366	0.38932	0.199575	0.766	0.004	no change	up	no: ATACseq no change, RNAseq up
C2_10660W_A	peak_2778	Promoter (<=1kb)	ASH1	3641249	0.388695	0.345152	1.421	0	no change	up	no: ATACseq no change, RNAseq up
C1_13250W_A	peak_1454	Promoter (1-2kb)	NA	3636143	0.386541	0.038385	-0.446	0.095	up	no change	no: ATACseq up, RNAseq no change
C1_00140W_A	peak_18	Exon (C1_00140W_A/C1_00140W_A, exon 1 of 1)	KEL1	3639318	-0.270503	0.227626	-0.16	0.628	no change	no change	same: no change
C1_10790W_A	peak_1201	Promoter (<=1kb)	CDC48	3644440	0.386495	0.0646524	1.59	0	no change	up	no: ATACseq no change, RNAseq up
C2_07650C_A	peak_2456	Promoter (<=1kb)	NA	3642342	0.386061	0.323168	0.076	0.782	no change	no change	same: no change
C3_03370C_A	peak_3151	Promoter (1-2kb)	NA	3638366	0.385978	0.169802	-0.247	0.512	no change	no change	same: no change
C2_01370C_A	peak_1802	5' UTR	NA	3635723	0.228758	0.668907	-2.17	0	no change	down	no: ATACseq no change, RNAseq down
C2_08660C_A	peak_2547	Promoter (<=1kb)	NA	3643907	0.385774	0.12874	1.313	0	no change	up	no: ATACseq no change, RNAseq up
C2_03070C_A	peak_1975	Promoter (<=1kb)	SMP3	3642980	0.385169	0.16727	-0.916	0	no change	down	no: ATACseq no change, RNAseq down
C1_12160W_A	peak_1352	Promoter (<=1kb)	MSO1	3642040	0.383559	0.124689	0.764	0.023	no change	up	no: ATACseq no change, RNAseq up
C2_03310C_A	peak_2013	Promoter (<=1kb)	VPS20	3637427	0.383348	0.180887	2.736	0	no change	up	no: ATACseq no change, RNAseq up
C1_14530W_A	peak_1645	Promoter (<=1kb)	NA	3643333	0.383309	0.142992	1.522	0	no change	up	no: ATACseq no change, RNAseq up
C2_01420C_A	peak_1808	Downstream (<1kb)	NA	3635841	0.425056	0.0991214	-1.532	0	no change	down	no: ATACseq no change, RNAseq down
C2_01180W_A	peak_1777	Promoter (<=1kb)	COX17	30515088	0.382598	0.158188	3.271	0	no change	up	no: ATACseq no change, RNAseq up
C1_02110C_A	peak_261	Promoter (<=1kb)	HGT2	3644579	0.382329	0.129756	0.208	0.495	no change	no change	same: no change
C1_04360C_A	peak_510	Promoter (<=1kb)	NA	30514985	0.382267	0.0663104	0.056	0.858	no change	no change	same: no change
C7_01850C_A	peak_5900	Promoter (<=1kb)	CRN1	3637034	0.381975	0.164969	0.271	0.281	no change	no change	same: no change
C2_10580W_A	peak_2767	Promoter (<=1kb)	UBC15	3641260	0.381485	0.297164	2.047	0	no change	up	no: ATACseq no change, RNAseq up
C2_00730C_A	peak_1733	Promoter (<=1kb)	NA	3638913	0.380887	0.145027	0.373	0.156	no change	no change	same: no change
C4_06340W_A	peak_4393	Promoter (<=1kb)	AGO1	3642828	0.380721	0.322792	1.106	0	no change	up	no: ATACseq no change, RNAseq up
CR_06380C_A	peak_6852	Promoter (<=1kb)	NA	3648139	0.380593	0.163704	0.833	0.006	no change	up	no: ATACseq no change, RNAseq up
C6_02010C_A	peak_5324	Promoter (<=1kb)	GPD2	3644563	0.380068	0.0219571	0.097	0.757	up	no change	no: ATACseq up, RNAseq no change
C1_08540C_A	peak_955	Promoter (<=1kb)	NA	3646497	0.379884	0.0556803	2.234	0	no change	up	no: ATACseq no change, RNAseq up
C7_00390W_A	peak_5735	Promoter (<=1kb)	SPL1	3638035	0.379756	0.155808	1.299	0	no change	up	no: ATACseq no change, RNAseq up
C2_03530W_A	peak_2047	Promoter (<=1kb)	NA	3637341	0.379638	0.0362385	0	0.992	up	no change	no: ATACseq up, RNAseq no change
C1_11200W_A	peak_1240	Promoter (<=1kb)	NA	3644396	0.37961	0.180095	1.329	0	no change	up	no: ATACseq no change, RNAseq up
C1_13160W_A	peak_1445	Promoter (<=1kb)	PSA2	3636159	0.378896	0.237676	2.175	0	no change	up	no: ATACseq no change, RNAseq up
CR_02100C_A	peak_6389	Promoter (<=1kb)	NA	3640141	0.378868	0.242392	1.252	0	no change	up	no: ATACseq no change, RNAseq up
C1_13220C_A	peak_1451	Promoter (<=1kb)	AKR1	3636166	0.378179	0.233435	0.105	0.71	no change	no change	same: no change
CR_08350W_A	peak_7109	Promoter (<=1kb)	NA	3642082	0.377993	0.0919903	1.946	0	no change	up	no: ATACseq no change, RNAseq up
C1_01550W_A	peak_203	Promoter (<=1kb)	VPS17	3640218	0.37764	0.227746	0.889	0.009	no change	up	no: ATACseq no change, RNAseq up
C3_06700C_A	peak_3570	Promoter (<=1kb)	NA	3642247	0.377286	0.0676416	0.064	0.836	no change	no change	same: no change
C3_00360W_A	peak_2853	Promoter (<=1kb)	NA	3640542	0.376621	0.0429485	0.796	0.053	up	no change	no: ATACseq up, RNAseq no change
C1_13690C_A	peak_1505	Promoter (<=1kb)	NA	30515076	0.376325	0.157226	1.021	0	no change	up	no: ATACseq no change, RNAseq up
C2_00370W_A	peak_1699	Promoter (<=1kb)	PDR6	3638824	0.376308	0.211195	0.019	0.97	no change	no change	same: no change
C4_03430W_A	peak_4105	Promoter (<=1kb)	MOH1	3646809	0.375805	0.033961	4.81	0	up	up	same: up
C3_00540C_A	peak_2867	Promoter (<=1kb)	IST1	3640587	0.375533	0.17512	1.173	0	no change	up	no: ATACseq no change, RNAseq up
C2_03410W_A	peak_2027	Promoter (<=1kb)	NA	3637412	0.375424	0.190856	-0.416	0.065	no change	no change	same: no change
C4_02540W_A	peak_4017	Promoter (<=1kb)	RGT1	3637920	0.374772	0.16441	-0.509	0.154	no change	no change	same: no change
CR_06700C_A	peak_6888	Promoter (<=1kb)	SOL3	3646625	0.374214	0.0858489	0.963	0	no change	up	no: ATACseq no change, RNAseq up
C2_01750C_A	peak_1833	Downstream (<1kb)	NA	3635734	0.0519128	0.852646	-0.727	0.03	no change	down	no: ATACseq no change, RNAseq down
C2_01750C_A	peak_1834	Exon (C2_01750C_A/C2_01750C_A, exon 1 of 1)	NA	3635734	-0.555844	0.0400567	-0.727	0.03	down	down	same: down
C2_00330C_A	peak_1695	Promoter (<=1kb)	HIR1	3638796	0.373853	0.154093	1.07	0	no change	up	no: ATACseq no change, RNAseq up
C2_09990C_A	peak_2699	Promoter (<=1kb)	YOR1	3643964	0.373412	0.0436436	2.963	0	up	up	same: up
C1_10290W_A	peak_1142	Promoter (<=1kb)	GCA1	3634903	0.372898	0.153027	0.656	0.047	no change	up	no: ATACseq no change, RNAseq up
C2_05660W_A	peak_2263	Promoter (<=1kb)	PNG2	3645568	0.372881	0.271585	1.144	0	no change	up	no: ATACseq no change, RNAseq up
C3_07740W_A	peak_3719	Promoter (<=1kb)	NA	3638453	0.372074	0.164679	-1.054	0	no change	down	no: ATACseq no change, RNAseq down
C1_05170C_A	peak_604	Promoter (<=1kb)	CUE5	3642467	0.370755	0.0628406	1.631	0	no change	up	no: ATACseq no change, RNAseq up
C2_01750C_A	peak_1840	Distal Intergenic	NA	3635734	-0.714087	0.0362626	-0.727	0.03	down	down	same: down
C2_01750C_A	peak_1841	Distal Intergenic	NA	3635734	-0.0274129	0.960275	-0.727	0.03	no change	down	no: ATACseq no change, RNAseq down
C2_01750C_A	peak_1842	Distal Intergenic	NA	3635734	-0.0962565	0.803006	-0.727	0.03	no change	down	no: ATACseq no change, RNAseq down
C2_01760C_A	peak_1843	Distal Intergenic	NA	3635736	-0.62905	0.10375	-0.815	0.009	no change	down	no: ATACseq no change, RNAseq down
C2_01760C_A	peak_1844	Downstream (2-3kb)	NA	3635736	0.121113	0.567477	-0.815	0.009	no change	down	no: ATACseq no change, RNAseq down
C2_01760C_A	peak_1845	Downstream (1-2kb)	NA	3635736	-0.554144	0.0971454	-0.815	0.009	no change	down	no: ATACseq no change, RNAseq down
C3_01910C_A	peak_3030	Promoter (<=1kb)	PMP3	30515182	0.370221	0.163104	0.938	0	no change	up	no: ATACseq no change, RNAseq up
C1_13880C_A	peak_1534	Promoter (<=1kb)	NA	3636133	0.370033	0.378986	-0.202	0.405	no change	no change	same: no change
C2_03530W_A	peak_2048	Promoter (<=1kb)	NA	3637341	0.369405	0.16727	0	0.992	no change	no change	same: no change
C1_04310C_A	peak_504	Promoter (<=1kb)	GIG1	3644712	0.368388	0.109151	-0.276	0.517	no change	no change	same: no change
C1_01170C_A	peak_161	Promoter (<=1kb)	ZCF17	3640205	0.367734	0.0859356	-1.039	0	no change	down	no: ATACseq no change, RNAseq down
C2_01780W_A	peak_1850	Exon (C2_01780W_A/C2_01780W_A, exon 1 of 1)	MSB2	3635830	-0.552984	0.0668294	-1.159	0	no change	down	no: ATACseq no change, RNAseq down
C2_01780W_A	peak_1851	Exon (C2_01780W_A/C2_01780W_A, exon 1 of 1)	MSB2	3635830	-0.50355	0.0475087	-1.159	0	down	down	same: down
C4_04560C_A	peak_4217	Promoter (<=1kb)	NA	3641105	0.367481	0.141159	0.257	0.296	no change	no change	same: no change
C5_04060C_A	peak_4941	Promoter (<=1kb)	MEC1	3647733	0.36715	0.318092	0.991	0	no change	up	no: ATACseq no change, RNAseq up
C1_00380C_A	peak_54	Promoter (<=1kb)	NAA25	3639292	0.366747	0.232391	-0.042	0.865	no change	no change	same: no change
C1_10040W_A	peak_1107	Promoter (<=1kb)	ERO1	3634810	0.366292	0.254646	1.703	0	no change	up	no: ATACseq no change, RNAseq up
C4_01690C_A	peak_3929	Promoter (<=1kb)	HRT2	3635709	0.365983	0.401071	1.674	0	no change	up	no: ATACseq no change, RNAseq up
C1_02030C_A	peak_253	Promoter (<=1kb)	NA	3645415	0.365342	0.118788	0.639	0.022	no change	up	no: ATACseq no change, RNAseq up
C4_01770W_A	peak_3940	Promoter (<=1kb)	POL30	3635583	0.365062	0.1865	-0.372	0.245	no change	no change	same: no change
C1_09610W_A	peak_1066	Promoter (<=1kb)	NA	3634891	0.364894	0.0527587	-0.06	0.835	no change	no change	same: no change
C7_01290W_A	peak_5833	Promoter (<=1kb)	MED11	3645910	0.364125	0.549592	1.028	0.001	no change	up	no: ATACseq no change, RNAseq up
C6_03810W_A	peak_5508	Promoter (<=1kb)	NA	3640286	0.363321	0.0672123	-0.794	0.001	no change	down	no: ATACseq no change, RNAseq down
C2_07290W_A	peak_2427	Promoter (<=1kb)	NA	3643476	0.36294	0.144389	-1.477	0	no change	down	no: ATACseq no change, RNAseq down
C7_02300W_A	peak_5959	Promoter (<=1kb)	YPS7	3636937	0.362448	0.199359	-0.841	0	no change	down	no: ATACseq no change, RNAseq down
C5_05430W_A	peak_5076	Promoter (<=1kb)	PEX4	3636429	0.362431	0.0970258	0.335	0.201	no change	no change	same: no change
CR_02350C_A	peak_6422	Promoter (<=1kb)	GEF2	3644935	0.361839	0.0480811	1.914	0	up	up	same: up
C3_07030C_A	peak_3618	Promoter (<=1kb)	NA	3638517	0.361596	0.236231	0.115	0.668	no change	no change	same: no change
C2_04500W_A	peak_2133	Promoter (<=1kb)	NA	3645462	0.361427	0.360929	-0.259	0.335	no change	no change	same: no change
C2_01980C_A	peak_1869	5' UTR	SRD1	3635764	-0.471575	0.296358	-0.945	0	no change	down	no: ATACseq no change, RNAseq down
C1_14470W_A	peak_1636	Promoter (<=1kb)	NA	3643327	0.361212	0.19255	1.526	0	no change	up	no: ATACseq no change, RNAseq up
CR_05750W_A	peak_6779	Promoter (<=1kb)	NA	3646696	0.360784	0.0770694	2.117	0	no change	up	no: ATACseq no change, RNAseq up
C1_10010C_A	peak_1104	Promoter (<=1kb)	SWE1	3634866	0.360236	0.0526604	-1.372	0	no change	down	no: ATACseq no change, RNAseq down
C4_01020C_A	peak_3861	Promoter (<=1kb)	NA	3635606	0.360219	0.039593	1.272	0	up	up	same: up
C1_09650W_A	peak_1071	Promoter (<=1kb)	NA	3634870	0.359775	0.295187	1.459	0	no change	up	no: ATACseq no change, RNAseq up
C1_08950W_A	peak_984	Promoter (<=1kb)	PFK26	3634912	0.359736	0.0498147	1.146	0	up	up	same: up
C6_00880W_A	peak_5212	Promoter (<=1kb)	PEX7	3644027	0.359711	0.144501	1.946	0	no change	up	no: ATACseq no change, RNAseq up
C1_01200W_A	peak_162	Promoter (<=1kb)	STB5	3640208	0.359321	0.163104	1.622	0	no change	up	no: ATACseq no change, RNAseq up
C5_03480C_A	peak_4880	Promoter (<=1kb)	NA	3646965	0.359239	0.247636	-1.968	0	no change	down	no: ATACseq no change, RNAseq down
C4_07130W_A	peak_4480	Promoter (<=1kb)	NA	3642938	0.358581	0.153514	-2.097	0	no change	down	no: ATACseq no change, RNAseq down
C5_05490C_A	peak_5088	Promoter (<=1kb)	HTS1	3636532	0.358017	0.307913	-2.255	0	no change	down	no: ATACseq no change, RNAseq down
C1_01490W_A	peak_188	Distal Intergenic	NA	3640226	0.342446	0.462497	-1.502	0	no change	down	no: ATACseq no change, RNAseq down
C6_03540W_A	peak_5467	Promoter (<=1kb)	NA	3640244	0.357592	0.374788	2.224	0	no change	up	no: ATACseq no change, RNAseq up
C2_03030W_A	peak_1968	Promoter (<=1kb)	LIG4	3642986	0.356782	0.0585103	1.341	0	no change	up	no: ATACseq no change, RNAseq up
C5_02690W_A	peak_4796	Promoter (<=1kb)	NA	3637775	0.356432	0.0841931	2.136	0	no change	up	no: ATACseq no change, RNAseq up
CR_07810W_A	peak_7016	Promoter (<=1kb)	YHB5	3647343	0.35569	0.178238	-2.503	0	no change	down	no: ATACseq no change, RNAseq down
C7_01680C_A	peak_5874	Promoter (<=1kb)	NA	3636981	0.355595	0.105372	-1.273	0.002	no change	down	no: ATACseq no change, RNAseq down
C1_06090C_A	peak_674	Promoter (<=1kb)	NA	3639822	0.355006	0.052038	-2.062	0	no change	down	no: ATACseq no change, RNAseq down
C2_02980C_A	peak_1960	Promoter (<=1kb)	DLD1	3643025	0.354756	0.0675048	1.89	0	no change	up	no: ATACseq no change, RNAseq up
C5_02030W_A	peak_4730	Promoter (<=1kb)	RPN8	3643770	0.354518	0.148603	2.317	0	no change	up	no: ATACseq no change, RNAseq up
C4_07050W_A	peak_4471	Promoter (<=1kb)	YDC1	3642962	0.354233	0.0962809	1.965	0	no change	up	no: ATACseq no change, RNAseq up
C1_10410W_A	peak_1163	Promoter (<=1kb)	NA	3634840	0.35417	0.109151	1.45	0	no change	up	no: ATACseq no change, RNAseq up
C1_07980C_A	peak_886	Promoter (<=1kb)	NA	3640696	0.353929	0.131469	3.663	0	no change	up	no: ATACseq no change, RNAseq up
C1_03150C_A	peak_375	Promoter (<=1kb)	NA	30514976	0.353793	0.198025	1.405	0	no change	up	no: ATACseq no change, RNAseq up
C3_03920W_A	peak_3208	Promoter (<=1kb)	NA	30515197	0.353088	0.178238	0.564	0.154	no change	no change	same: no change
C1_07320W_A	peak_819	Promoter (<=1kb)	NA	30515023	0.352705	0.0982537	0.374	0.64	no change	no change	same: no change
C2_02240C_A	peak_1896	Exon (C2_02240C_A/C2_02240C_A, exon 1 of 1)	HEX3	3635776	0.886454	0.00966825	1.124	0	up	up	same: up
C4_04410C_A	peak_4202	Promoter (<=1kb)	LYS4	3641180	0.35215	0.0579079	0.342	0.185	no change	no change	same: no change
C2_08100W_A	peak_2498	Promoter (<=1kb)	NA	3642334	0.3518	0.0721176	0.539	0.023	no change	up	no: ATACseq no change, RNAseq up
C3_03510C_A	peak_3173	Promoter (<=1kb)	NA	3638310	0.351742	0.141361	0.82	0.001	no change	up	no: ATACseq no change, RNAseq up
C1_00150C_A	peak_19	Exon (C1_00150C_A/C1_00150C_A, exon 1 of 1)	RIM8	3639342	-0.405546	0.17594	0.696	0.095	no change	no change	same: no change
C5_03240W_A	peak_4847	Promoter (<=1kb)	BUB3	3646362	0.351691	0.060817	2.869	0	no change	up	no: ATACseq no change, RNAseq up
C1_00210C_A	peak_35	Promoter (<=1kb)	NA	3639335	0.351195	0.113234	-1.731	0	no change	down	no: ATACseq no change, RNAseq down
C2_02290C_A	peak_1902	Exon (C2_02290C_A/C2_02290C_A, exon 1 of 1)	NA	3635807	-0.0809431	0.880207	-0.094	0.748	no change	no change	same: no change
C1_06530C_A	peak_727	Promoter (<=1kb)	NA	3639521	0.351119	0.250262	-0.458	0.055	no change	no change	same: no change
C1_11920W_A	peak_1326	Promoter (<=1kb)	NA	3642003	0.350711	0.37086	1.319	0	no change	up	no: ATACseq no change, RNAseq up
C1_00590W_A	peak_81	Promoter (<=1kb)	TUF1	3639360	0.350512	0.134945	-1.79	0	no change	down	no: ATACseq no change, RNAseq down
C2_03240C_A	peak_2002	Promoter (<=1kb)	ROM2	3637434	0.350149	0.182358	0.417	0.083	no change	no change	same: no change
CR_02800C_A	peak_6487	Promoter (<=1kb)	NA	3642559	0.349446	0.44812	1.671	0	no change	up	no: ATACseq no change, RNAseq up
C7_01680C_A	peak_5875	Promoter (1-2kb)	NA	3636981	0.348685	0.081084	-1.273	0.002	no change	down	no: ATACseq no change, RNAseq down
C2_05360C_A	peak_2217	Promoter (<=1kb)	BIO32	3643430	0.348683	0.229611	1.377	0	no change	up	no: ATACseq no change, RNAseq up
CR_10380C_A	peak_7478	Promoter (<=1kb)	NA	3638953	0.34857	0.262603	-1.128	0	no change	down	no: ATACseq no change, RNAseq down
C4_02720C_A	peak_4035	Promoter (1-2kb)	NA	3637857	0.348491	0.0322037	0.967	0	up	up	same: up
C1_11670W_A	peak_1292	Promoter (<=1kb)	NA	3645338	0.34824	0.0666478	1.757	0	no change	up	no: ATACseq no change, RNAseq up
C6_00720C_A	peak_5179	Promoter (<=1kb)	COX15	3647071	0.347386	0.0741378	-0.229	0.464	no change	no change	same: no change
C7_01930C_A	peak_5909	Promoter (<=1kb)	NA	3637027	0.347225	0.328701	1.277	0	no change	up	no: ATACseq no change, RNAseq up
C2_02460W_A	peak_1915	Exon (C2_02460W_A/C2_02460W_A, exon 1 of 1)	ERG7	3635761	-0.741445	0.126467	0.355	0.116	no change	no change	same: no change
C6_01780C_A	peak_5303	Promoter (<=1kb)	NA	3641636	0.347085	0.0411709	-2.794	0	up	down	no: ATACseq up, RNAseq down
C2_02480W_A	peak_1917	Downstream (<1kb)	tV(AAC)1	30515094	0.723413	0.197687	-2.427	0.002	no change	down	no: ATACseq no change, RNAseq down
C2_02480W_A	peak_1918	Exon (C2_02490C_A/C2_02490C_A, exon 1 of 1)	tV(AAC)1	30515094	-0.165308	0.679715	-2.427	0.002	no change	down	no: ATACseq no change, RNAseq down
C6_01300W_A	peak_5248	Promoter (<=1kb)	NA	3644024	0.346646	0.242743	2.322	0	no change	up	no: ATACseq no change, RNAseq up
CR_05340C_A	peak_6729	Promoter (<=1kb)	IFE2	3648027	0.346612	0.0541599	3.621	0	no change	up	no: ATACseq no change, RNAseq up
C2_08210C_A	peak_2509	Promoter (<=1kb)	MFA1	30515153	0.346528	0.489379	5.551	0	no change	up	no: ATACseq no change, RNAseq up
C6_02340W_A	peak_5361	Promoter (<=1kb)	HRR25	3645878	0.346293	0.239878	-1.143	0	no change	down	no: ATACseq no change, RNAseq down
C2_02550C_A	peak_1922	Exon (C2_02550C_A/C2_02550C_A, exon 1 of 1)	NA	3635856	-0.176565	0.462497	4.237	0	no change	up	no: ATACseq no change, RNAseq up
C5_02930C_A	peak_4815	Promoter (<=1kb)	GRE3	3637811	0.34571	0.12034	2.124	0	no change	up	no: ATACseq no change, RNAseq up
C2_02580W_A	peak_1925	Exon (C2_02580W_A/C2_02580W_A, exon 1 of 1)	NA	3635860	-0.156686	0.710075	-0.132	0.671	no change	no change	same: no change
C7_03580C_A	peak_6069	Promoter (<=1kb)	NA	3646238	0.34534	0.0628656	3.755	0	no change	up	no: ATACseq no change, RNAseq up
C1_14430C_A	peak_1627	Promoter (<=1kb)	NA	3643297	0.344778	0.207641	1.298	0.001	no change	up	no: ATACseq no change, RNAseq up
C2_00260C_A	peak_1691	Promoter (<=1kb)	MUQ1	3638898	0.344128	0.137129	2.344	0	no change	up	no: ATACseq no change, RNAseq up
CR_07790C_A	peak_7009	Promoter (1-2kb)	YHB1	3647353	0.343631	0.118837	-0.836	0.145	no change	no change	same: no change
C6_04500C_A	peak_5640	Promoter (<=1kb)	TSM1	3645953	0.343432	0.256314	-0.078	0.783	no change	no change	same: no change
C2_00960C_A	peak_1750	Promoter (<=1kb)	MXR1	3638881	0.343399	0.12322	2.381	0	no change	up	no: ATACseq no change, RNAseq up
C7_00080C_A	peak_5694	Promoter (<=1kb)	SAC7	3638010	0.343343	0.121817	-0.975	0.016	no change	down	no: ATACseq no change, RNAseq down
C4_03370C_A	peak_4094	Promoter (<=1kb)	NA	3646796	0.342934	0.18235	2.032	0	no change	up	no: ATACseq no change, RNAseq up
C2_02670C_A	peak_1933	Exon (C2_02670C_A/C2_02670C_A, exon 1 of 1)	NA	3643008	0.254174	0.572269	1.326	0	no change	up	no: ATACseq no change, RNAseq up
CR_08890C_A	peak_7245	Promoter (<=1kb)	ASR2	3641907	0.342927	0.148022	2.168	0.001	no change	up	no: ATACseq no change, RNAseq up
C2_05400W_A	peak_2220	Promoter (<=1kb)	NA	3643435	0.342199	0.20806	-0.437	0.283	no change	no change	same: no change
C2_06880C_A	peak_2395	Promoter (<=1kb)	PRB1	3643521	0.341439	0.0879049	2.823	0	no change	up	no: ATACseq no change, RNAseq up
C6_03360C_A	peak_5449	Promoter (1-2kb)	NA	3639203	0.341394	0.298033	0.086	1	no change	no change	same: no change
C1_01780C_A	peak_231	Promoter (<=1kb)	HOL4	3645409	0.341051	0.114972	0.21	0.452	no change	no change	same: no change
C1_13930W_A	peak_1543	Promoter (<=1kb)	SSK1	3636184	0.340982	0.115158	0.473	0.032	no change	up	no: ATACseq no change, RNAseq up
C1_01510W_A	peak_194	Exon (C1_01510W_A/C1_01510W_A, exon 1 of 1)	NA	3640229	-0.220104	0.573006	-1.429	0.026	no change	down	no: ATACseq no change, RNAseq down
C2_04340C_A	peak_2123	Promoter (<=1kb)	NA	3645452	0.340363	0.3188	0.456	0.104	no change	no change	same: no change
C1_13140C_A	peak_1441	Promoter (<=1kb)	TYE7	3636203	0.340284	0.0469753	-2.267	0	up	down	no: ATACseq up, RNAseq down
C2_02820C_A	peak_1942	Exon (C2_02820C_A/C2_02820C_A, exon 1 of 1)	NA	3643027	-0.19754	0.684973	-2.45	0	no change	down	no: ATACseq no change, RNAseq down
C4_01780C_A	peak_3941	Promoter (<=1kb)	NA	3635582	0.339385	0.459259	-0.054	0.854	no change	no change	same: no change
C2_05710C_A	peak_2270	Promoter (<=1kb)	NA	30515127	0.339217	0.300283	-1.997	0	no change	down	no: ATACseq no change, RNAseq down
CR_02070C_A	peak_6385	Promoter (<=1kb)	ADH5	3640156	0.338753	0.0568752	0.66	0.182	no change	no change	same: no change
C4_03410W_A	peak_4098	Promoter (<=1kb)	NA	3646807	0.338263	0.430358	-2.292	0	no change	down	no: ATACseq no change, RNAseq down
C6_03710W_A	peak_5495	Promoter (1-2kb)	ALS9	3640281	0.33822	0.0728099	0.664	0.032	no change	up	no: ATACseq no change, RNAseq up
C2_00520W_A	peak_1715	Promoter (<=1kb)	DFG5	3638867	0.337932	0.336154	0.449	0.042	no change	up	no: ATACseq no change, RNAseq up
C2_06540C_A	peak_2341	Promoter (<=1kb)	SPF1	3646573	0.337055	0.494777	0.193	0.466	no change	no change	same: no change
C1_01510W_A	peak_195	Exon (C1_01510W_A/C1_01510W_A, exon 1 of 1)	NA	3640229	-0.168461	0.717298	-1.429	0.026	no change	down	no: ATACseq no change, RNAseq down
C5_00870C_A	peak_4617	Promoter (<=1kb)	GIT4	3642635	0.335807	0.332794	0.322	0.494	no change	no change	same: no change
C6_02730W_A	peak_5397	Promoter (<=1kb)	SAC6	3639213	0.335745	0.284903	1.317	0	no change	up	no: ATACseq no change, RNAseq up
C4_02690W_A	peak_4030	Promoter (<=1kb)	NA	3637861	0.335716	0.439235	1.623	0	no change	up	no: ATACseq no change, RNAseq up
C6_00890W_A	peak_5215	Promoter (<=1kb)	NA	3644028	0.335694	0.395761	0.705	0.001	no change	up	no: ATACseq no change, RNAseq up
C2_03680W_A	peak_2062	Promoter (<=1kb)	SAP98	3637435	0.334493	0.382474	1.34	0	no change	up	no: ATACseq no change, RNAseq up
C2_06330C_A	peak_2317	Promoter (<=1kb)	AVT1	3646928	0.334308	0.266004	-0.745	0.01	no change	down	no: ATACseq no change, RNAseq down
C2_02950W_A	peak_1955	Promoter (<=1kb)	BNA31	3643012	0.334183	0.0947238	2.806	0	no change	up	no: ATACseq no change, RNAseq up
C7_03970C_A	peak_6097	Promoter (<=1kb)	NA	3643117	0.334086	0.313761	1.263	0	no change	up	no: ATACseq no change, RNAseq up
C4_03280W_A	peak_4084	Promoter (<=1kb)	MSN5	3637889	0.333143	0.0489528	1.251	0	up	up	same: up
C2_02980C_A	peak_1959	Exon (C2_02980C_A/C2_02980C_A, exon 1 of 1)	DLD1	3643025	-0.266098	0.492016	1.89	0	no change	up	no: ATACseq no change, RNAseq up
C1_01510W_A	peak_196	Distal Intergenic	NA	3640229	-0.643074	0.00723017	-1.429	0.026	down	down	same: down
C7_03240W_A	peak_6029	Promoter (<=1kb)	NA	3641368	0.332566	0.147169	1.941	0	no change	up	no: ATACseq no change, RNAseq up
C2_03900C_A	peak_2082	Promoter (<=1kb)	NA	3637395	0.332463	0.104445	0.908	0	no change	up	no: ATACseq no change, RNAseq up
C1_08950W_A	peak_986	Promoter (<=1kb)	PFK26	3634912	0.331696	0.297831	1.146	0	no change	up	no: ATACseq no change, RNAseq up
C1_07880C_A	peak_873	Promoter (<=1kb)	GCS1	3640742	0.331452	0.0898757	2.271	0	no change	up	no: ATACseq no change, RNAseq up
C6_01160W_A	peak_5240	Promoter (<=1kb)	RCN1	3644058	0.330727	0.374678	1.269	0	no change	up	no: ATACseq no change, RNAseq up
C2_09480W_A	peak_2642	Promoter (<=1kb)	NA	3643819	0.330569	0.140125	3.793	0	no change	up	no: ATACseq no change, RNAseq up
C1_05510C_A	peak_629	Promoter (1-2kb)	RPS27A	30514993	0.33027	0.202008	2.644	0	no change	up	no: ATACseq no change, RNAseq up
C6_00570C_A	peak_5169	Promoter (<=1kb)	NHX1	3647141	0.329864	0.0991214	0.555	0.01	no change	up	no: ATACseq no change, RNAseq up
C6_02410W_A	peak_5364	Promoter (<=1kb)	NA	3645884	0.329494	0.234065	1.271	0	no change	up	no: ATACseq no change, RNAseq up
C2_03030W_A	peak_1969	Exon (C2_03030W_A/C2_03030W_A, exon 1 of 1)	LIG4	3642986	0.188782	0.716626	1.341	0	no change	up	no: ATACseq no change, RNAseq up
C1_01510W_A	peak_197	Downstream (2-3kb)	NA	3640229	-0.447877	0.0154581	-1.429	0.026	down	down	same: down
C1_04950C_A	peak_566	Promoter (<=1kb)	RPM2	3644790	0.328801	0.0734788	0.778	0.006	no change	up	no: ATACseq no change, RNAseq up
C3_00800W_A	peak_2910	Promoter (1-2kb)	MIH1	3648188	0.328753	0.20055	-0.117	0.741	no change	no change	same: no change
C1_00970W_A	peak_131	Promoter (<=1kb)	NA	30514958	0.328389	0.405462	0.96	0.001	no change	up	no: ATACseq no change, RNAseq up
C2_03070C_A	peak_1973	Exon (C2_03070C_A/C2_03070C_A, exon 1 of 1)	SMP3	3642980	-0.132488	0.78939	-0.916	0	no change	down	no: ATACseq no change, RNAseq down
C3_02410C_A	peak_3075	Promoter (<=1kb)	NA	3638341	0.328317	0.205255	0.297	0.272	no change	no change	same: no change
C1_06350W_A	peak_711	Promoter (1-2kb)	NA	3639562	0.327527	0.1865	-0.804	0.004	no change	down	no: ATACseq no change, RNAseq down
C3_00770C_A	peak_2905	Promoter (<=1kb)	SCL1	3640510	0.327451	0.142554	2.134	0	no change	up	no: ATACseq no change, RNAseq up
C2_03080W_A	peak_1977	Exon (C2_03080W_A/C2_03080W_A, exon 1 of 1)	IDH2	3642979	-0.231586	0.53651	-0.506	0.07	no change	no change	same: no change
C2_03080W_A	peak_1978	Exon (C2_03080W_A/C2_03080W_A, exon 1 of 1)	IDH2	3642979	-0.233579	0.409931	-0.506	0.07	no change	no change	same: no change
C2_03090C_A	peak_1979	Exon (C2_03090C_A/C2_03090C_A, exon 1 of 1)	ADE8	3642999	-0.413273	0.368513	-3.042	0	no change	down	no: ATACseq no change, RNAseq down
C1_01520C_A	peak_198	Downstream (<1kb)	SOD2	3640231	0.40843	0.190856	2.393	0	no change	up	no: ATACseq no change, RNAseq up
CR_07840C_A	peak_7019	Promoter (<=1kb)	NA	3647346	0.327107	0.268233	0.725	0.118	no change	no change	same: no change
C2_07460W_A	peak_2441	Promoter (<=1kb)	TAF4	3645198	0.326986	0.321757	0.526	0.016	no change	up	no: ATACseq no change, RNAseq up
C2_03110W_A	peak_1982	Exon (C2_03100W_A/C2_03100W_A, exon 2 of 2)	NA	3642995	-0.619628	0.0455014	3.571	0	down	up	no: ATACseq down, RNAseq up
C1_11080W_A	peak_1229	Promoter (<=1kb)	NA	3644416	0.326882	0.0425058	0.773	0.001	up	up	same: up
CR_05070W_A	peak_6700	Promoter (1-2kb)	tH(GUG)1	30515401	0.325927	0.205193	-0.564	0.503	no change	no change	same: no change
C1_05910W_A	peak_656	Promoter (<=1kb)	SIP5	3639865	0.325567	0.159184	1.854	0	no change	up	no: ATACseq no change, RNAseq up
C2_01290C_A	peak_1791	Promoter (<=1kb)	tL(UAA)1	30515089	0.325233	0.472097	-1.75	0.022	no change	down	no: ATACseq no change, RNAseq down
CR_09960C_A	peak_7420	Promoter (<=1kb)	UGA3	3638926	0.325157	0.0675225	1.461	0	no change	up	no: ATACseq no change, RNAseq up
C6_02340W_A	peak_5360	Promoter (1-2kb)	HRR25	3645878	0.325056	0.590894	-1.143	0	no change	down	no: ATACseq no change, RNAseq down
C1_07220W_A	peak_807	Promoter (<=1kb)	NA	3644460	0.3245	0.0716225	1.357	0	no change	up	no: ATACseq no change, RNAseq up
C4_04270W_A	peak_4185	Promoter (<=1kb)	NA	3646847	0.324296	0.447669	2.826	0	no change	up	no: ATACseq no change, RNAseq up
C6_04410C_A	peak_5608	Promoter (<=1kb)	NA	3645950	0.324055	0.227143	1.641	0	no change	up	no: ATACseq no change, RNAseq up
C1_14210C_A	peak_1586	Promoter (<=1kb)	IML2	3643302	0.324004	0.077384	0.76	0.001	no change	up	no: ATACseq no change, RNAseq up
C7_01690W_A	peak_5877	Promoter (<=1kb)	NA	3636980	0.323655	0.195463	1.383	0	no change	up	no: ATACseq no change, RNAseq up
CR_05910W_A	peak_6793	Promoter (<=1kb)	NA	3646680	0.323169	0.328896	-0.221	0.383	no change	no change	same: no change
C2_01300C_A	peak_1794	Promoter (<=1kb)	MNN24	3638789	0.32257	0.193896	-0.561	0.083	no change	no change	same: no change
C2_03210W_A	peak_1995	Downstream (<1kb)	NA	30515098	0.301322	0.0714598	0.302	0.368	no change	no change	same: no change
C2_03220C_A	peak_1996	Exon (C2_03220C_A/C2_03220C_A, exon 1 of 1)	STP4	3637405	-0.278767	0.345184	0.983	0	no change	up	no: ATACseq no change, RNAseq up
C2_02390W_A	peak_1909	Promoter (<=1kb)	NA	3635829	0.322006	0.132182	-0.446	0.205	no change	no change	same: no change
C4_07030W_A	peak_4469	Promoter (<=1kb)	MET16	3642964	0.321586	0.228726	-0.004	0.998	no change	no change	same: no change
C2_03230C_A	peak_1999	Downstream (<1kb)	FEN12	3637404	0.326282	0.193896	-1.06	0	no change	down	no: ATACseq no change, RNAseq down
C2_01240C_A	peak_1788	Promoter (<=1kb)	NA	3638794	0.321496	0.146227	-0.249	0.306	no change	no change	same: no change
C5_02790C_A	peak_4804	Promoter (<=1kb)	GAP1	3637806	0.321364	0.0570239	0.841	0.001	no change	up	no: ATACseq no change, RNAseq up
C5_04810W_A	peak_5005	Promoter (<=1kb)	PFK1	3636448	0.321283	0.298922	1.299	0	no change	up	no: ATACseq no change, RNAseq up
C1_03760C_A	peak_444	Promoter (<=1kb)	STR2	3644689	0.321034	0.0730543	0.39	0.111	no change	no change	same: no change
C1_02880C_A	peak_350	Promoter (<=1kb)	MIA40	3636866	0.320732	0.105372	1.404	0	no change	up	no: ATACseq no change, RNAseq up
C1_10220C_A	peak_1133	Promoter (<=1kb)	TPK1	3634879	0.320622	0.097656	-0.004	0.984	no change	no change	same: no change
C2_05460W_A	peak_2226	Promoter (<=1kb)	CDC19	3643438	0.320366	0.060817	-0.05	0.89	no change	no change	same: no change
C4_00020W_A	peak_3758	Promoter (<=1kb)	VMA6	3648053	0.320328	0.208296	0.702	0.031	no change	up	no: ATACseq no change, RNAseq up
C3_01360C_A	peak_2976	Promoter (<=1kb)	IRO1	3636648	0.319535	0.169329	0.037	0.878	no change	no change	same: no change
C5_01830C_A	peak_4712	Promoter (<=1kb)	HAL9	3643757	0.318961	0.208104	-0.161	0.482	no change	no change	same: no change
C5_00690C_A	peak_4603	Promoter (<=1kb)	TFB3	3644115	0.318278	0.271505	2.431	0	no change	up	no: ATACseq no change, RNAseq up
C2_05180W_A	peak_2202	Promoter (<=1kb)	WH11	30515117	0.318268	0.0875288	1.976	0.024	no change	up	no: ATACseq no change, RNAseq up
C6_03370W_A	peak_5452	Promoter (<=1kb)	NA	3639230	0.318178	0.523625	0.952	0.003	no change	up	no: ATACseq no change, RNAseq up
C7_00720W_A	peak_5773	Promoter (<=1kb)	RTF1	3637964	0.318143	0.0687733	-0.009	0.986	no change	no change	same: no change
C1_11270W_A	peak_1249	Promoter (<=1kb)	NA	3644555	0.317188	0.465784	3.507	0	no change	up	no: ATACseq no change, RNAseq up
C4_01100C_A	peak_3872	Promoter (<=1kb)	AGP2	3635684	0.317157	0.0791549	-1.817	0	no change	down	no: ATACseq no change, RNAseq down
C3_03810W_A	peak_3194	Promoter (<=1kb)	RAD53	3645633	0.316955	0.131693	0.954	0	no change	up	no: ATACseq no change, RNAseq up
C2_00630C_A	peak_1724	Promoter (<=1kb)	NA	3638848	0.31682	0.213102	0.955	0.002	no change	up	no: ATACseq no change, RNAseq up
C6_03310W_A	peak_5442	Promoter (<=1kb)	NA	3639197	0.316724	0.162266	1.505	0	no change	up	no: ATACseq no change, RNAseq up
C4_03940C_A	peak_4153	Promoter (<=1kb)	PYC2	3637323	0.316707	0.0811543	0.881	0.006	no change	up	no: ATACseq no change, RNAseq up
C2_03320W_A	peak_2016	Exon (C2_03320W_A/C2_03320W_A, exon 1 of 1)	CHK1	3637394	-0.196626	0.637988	3.145	0	no change	up	no: ATACseq no change, RNAseq up
C1_03500W_A	peak_419	Promoter (<=1kb)	YPT1	3636915	0.31635	0.294263	0.627	0.016	no change	up	no: ATACseq no change, RNAseq up
C2_03340W_A	peak_2018	Exon (C2_03340W_A/C2_03340W_A, exon 1 of 1)	NA	3637392	-0.0816652	0.796071	0.651	0.002	no change	up	no: ATACseq no change, RNAseq up
C5_02630C_A	peak_4788	Promoter (<=1kb)	MNN1	3637784	0.315842	0.124409	0.149	0.8	no change	no change	same: no change
C1_01540W_A	peak_202	5' UTR	NA	3640233	-0.256057	0.32966	2.817	0	no change	up	no: ATACseq no change, RNAseq up
C1_11200W_A	peak_1242	Promoter (<=1kb)	NA	3644396	0.315737	0.278185	1.329	0	no change	up	no: ATACseq no change, RNAseq up
C1_14130W_A	peak_1574	Promoter (<=1kb)	FTR1	3643318	0.315277	0.0736081	-1.675	0	no change	down	no: ATACseq no change, RNAseq down
C2_05740W_A	peak_2272	Promoter (<=1kb)	SPO7	3645576	0.314793	0.441518	-1.728	0	no change	down	no: ATACseq no change, RNAseq down
C2_08620W_A	peak_2543	Promoter (<=1kb)	NA	3643912	0.313463	0.141397	1.878	0	no change	up	no: ATACseq no change, RNAseq up
C2_03390C_A	peak_2024	Exon (C2_03380W_A/C2_03380W_A, exon 1 of 1)	HSP78	3637414	0.527009	0.0858489	4.071	0	no change	up	no: ATACseq no change, RNAseq up
C2_00720C_A	peak_1730	Promoter (<=1kb)	FGR15	3638882	0.312594	0.206982	-0.425	0.058	no change	no change	same: no change
C5_03130W_A	peak_4834	Promoter (<=1kb)	SUT1	3637706	0.312378	0.0725203	-4.224	0	no change	down	no: ATACseq no change, RNAseq down
CR_03740C_A	peak_6579	Promoter (<=1kb)	NA	3643176	0.31221	0.178357	1.728	0	no change	up	no: ATACseq no change, RNAseq up
C6_02490C_A	peak_5373	Promoter (<=1kb)	NA	3639171	0.311918	0.12183	-1.029	0	no change	down	no: ATACseq no change, RNAseq down
C2_03460C_A	peak_2029	Exon (C2_03460C_A/C2_03460C_A, exon 1 of 1)	NA	3637348	-0.485862	0.267242	2.157	0	no change	up	no: ATACseq no change, RNAseq up
C3_04060C_A	peak_3230	Promoter (<=1kb)	HEM13	3647390	0.311818	0.100466	0.313	0.304	no change	no change	same: no change
C6_00160W_A	peak_5106	Promoter (<=1kb)	PGA48	3647905	0.311758	0.231291	-2.197	0	no change	down	no: ATACseq no change, RNAseq down
C5_04800W_A	peak_5004	Promoter (<=1kb)	CRH12	3636447	0.311749	0.313974	0.367	0.196	no change	no change	same: no change
C2_04170C_A	peak_2104	Promoter (<=1kb)	NA	30515111	0.311662	0.332794	-0.551	0.053	no change	no change	same: no change
C5_00890C_A	peak_4622	Promoter (<=1kb)	GIT2	3642633	0.311525	0.50657	-1.001	0	no change	down	no: ATACseq no change, RNAseq down
C2_03500W_A	peak_2034	Distal Intergenic	NA	3637345	0.605147	0.0961567	1.328	0	no change	up	no: ATACseq no change, RNAseq up
C2_03500W_A	peak_2035	Distal Intergenic	NA	3637345	1.24488	0.00076867	1.328	0	up	up	same: up
C2_03500W_A	peak_2036	Distal Intergenic	NA	3637345	0.603759	0.076452	1.328	0	no change	up	no: ATACseq no change, RNAseq up
C2_03500W_A	peak_2037	Distal Intergenic	NA	3637345	0.75137	0.00402245	1.328	0	up	up	same: up
C2_03500W_A	peak_2038	Distal Intergenic	NA	3637345	0.785494	0.0170672	1.328	0	up	up	same: up
C2_03520C_A	peak_2039	Distal Intergenic	ADAEC	3637342	0.423913	0.0348963	0.415	0.102	up	no change	no: ATACseq up, RNAseq no change
C4_06170C_A	peak_4385	Promoter (<=1kb)	NA	3642818	0.310685	0.255038	-1.077	0	no change	down	no: ATACseq no change, RNAseq down
C2_03520C_A	peak_2040	Distal Intergenic	ADAEC	3637342	-0.0285569	0.937128	0.415	0.102	no change	no change	same: no change
C2_03520C_A	peak_2041	Downstream (<1kb)	ADAEC	3637342	0.298511	0.0550978	0.415	0.102	no change	no change	same: no change
C2_03520C_A	peak_2042	Downstream (<1kb)	ADAEC	3637342	0.494504	0.0905382	0.415	0.102	no change	no change	same: no change
C2_03520C_A	peak_2043	Exon (C2_03520C_A/C2_03520C_A, exon 1 of 1)	ADAEC	3637342	0.59543	0.0385375	0.415	0.102	up	no change	no: ATACseq up, RNAseq no change
C2_03520C_A	peak_2044	Exon (C2_03520C_A/C2_03520C_A, exon 1 of 1)	ADAEC	3637342	0.118738	0.729744	0.415	0.102	no change	no change	same: no change
C6_03800C_A	peak_5506	Promoter (<=1kb)	NA	3640310	0.310664	0.117649	-0.278	0.289	no change	no change	same: no change
CR_07790C_A	peak_7007	Promoter (<=1kb)	YHB1	3647353	0.310039	0.113246	-0.836	0.145	no change	no change	same: no change
CR_02060W_A	peak_6384	Promoter (<=1kb)	NA	3640155	0.30992	0.319459	2.825	0	no change	up	no: ATACseq no change, RNAseq up
CR_02740W_A	peak_6480	Promoter (1-2kb)	INN1	3642578	0.309405	0.427551	-0.416	0.062	no change	no change	same: no change
C5_05330C_A	peak_5068	Promoter (<=1kb)	RER2	3636399	0.309015	0.144427	-0.442	0.182	no change	no change	same: no change
C2_01200C_A	peak_1782	Promoter (<=1kb)	REG1	3638858	0.308878	0.103651	-0.547	0.027	no change	down	no: ATACseq no change, RNAseq down
C2_03540W_A	peak_2050	Exon (C2_03540W_A/C2_03540W_A, exon 1 of 1)	RAD32	3637340	0.280173	0.255543	0.005	0.986	no change	no change	same: no change
C2_03540W_A	peak_2051	Exon (C2_03540W_A/C2_03540W_A, exon 1 of 1)	RAD32	3637340	0.583942	0.149042	0.005	0.986	no change	no change	same: no change
C2_03540W_A	peak_2052	Exon (C2_03540W_A/C2_03540W_A, exon 1 of 1)	RAD32	3637340	0.533931	0.196762	0.005	0.986	no change	no change	same: no change
C2_03580W_A	peak_2053	Exon (C2_03580W_A/C2_03580W_A, exon 1 of 1)	NA	30515100	0.36011	0.321277	1.221	0.005	no change	up	no: ATACseq no change, RNAseq up
C2_09180W_A	peak_2603	Promoter (<=1kb)	NA	3644092	0.308821	0.289895	0.554	0.015	no change	up	no: ATACseq no change, RNAseq up
C2_06940C_A	peak_2401	Promoter (<=1kb)	ARE2	3643526	0.308788	0.236019	3.233	0	no change	up	no: ATACseq no change, RNAseq up
C1_10710C_A	peak_1195	Promoter (<=1kb)	NA	3644407	0.308674	0.354085	1.262	0	no change	up	no: ATACseq no change, RNAseq up
C3_06200C_A	peak_3506	Promoter (<=1kb)	MMS21	3642265	0.308619	0.317678	0.174	0.506	no change	no change	same: no change
C2_06210C_A	peak_2308	Promoter (<=1kb)	SER1	3646909	0.308402	0.202735	0.107	0.71	no change	no change	same: no change
C1_01920W_A	peak_244	Promoter (<=1kb)	ROA1	3645424	0.30748	0.184489	-0.2	0.463	no change	no change	same: no change
C2_05650W_A	peak_2262	Promoter (<=1kb)	VPS35	3645567	0.307343	0.248721	1.902	0	no change	up	no: ATACseq no change, RNAseq up
C4_00350W_A	peak_3788	Promoter (<=1kb)	PEP7	3645001	0.306855	0.309024	2.578	0	no change	up	no: ATACseq no change, RNAseq up
C5_00200C_A	peak_4525	Promoter (<=1kb)	BDF1	3641592	0.306654	0.248708	0.149	0.629	no change	no change	same: no change
C2_07160W_A	peak_2416	Promoter (<=1kb)	SMF12	3643509	0.30642	0.137201	-0.526	0.023	no change	down	no: ATACseq no change, RNAseq down
C3_07860C_A	peak_3743	Promoter (<=1kb)	MRR2	3647468	0.305974	0.1827	0.765	0.042	no change	up	no: ATACseq no change, RNAseq up
C4_02750W_A	peak_4045	Promoter (<=1kb)	HIT1	3637854	0.305903	0.121211	-2.619	0	no change	down	no: ATACseq no change, RNAseq down
C4_03130W_A	peak_4077	Promoter (<=1kb)	NA	3637921	0.305532	0.523718	-0.145	0.518	no change	no change	same: no change
C2_03700W_A	peak_2066	Distal Intergenic	NA	3637375	-0.334385	0.523718	0.307	0.204	no change	no change	same: no change
C4_02470C_A	peak_4008	Promoter (<=1kb)	NA	3637869	0.305431	0.166145	1.882	0	no change	up	no: ATACseq no change, RNAseq up
C3_06190C_A	peak_3502	Promoter (1-2kb)	ALS6	3642266	0.304954	0.0782967	1.868	0	no change	up	no: ATACseq no change, RNAseq up
C2_03750W_A	peak_2071	Downstream (<1kb)	YIM1	3637372	0.604127	0.150777	4.991	0	no change	up	no: ATACseq no change, RNAseq up
C2_06320W_A	peak_2315	Promoter (<=1kb)	NA	3646927	0.304905	0.325602	0.086	0.739	no change	no change	same: no change
C1_03770W_A	peak_445	Promoter (<=1kb)	SKO1	3644688	0.30487	0.366903	-0.289	0.302	no change	no change	same: no change
C2_03250W_A	peak_2004	Promoter (<=1kb)	AVT7	3637433	0.304802	0.257796	0.356	0.143	no change	no change	same: no change
C2_09910C_A	peak_2685	Promoter (<=1kb)	NA	30515162	0.303754	0.310361	0.441	0.147	no change	no change	same: no change
C7_00320C_A	peak_5729	Promoter (<=1kb)	PMR1	3638043	0.303428	0.303386	-0.667	0.005	no change	down	no: ATACseq no change, RNAseq down
C2_03810C_A	peak_2077	Exon (C2_03810C_A/C2_03810C_A, exon 2 of 2)	RPL21A	3637400	-0.397188	0.356946	-1.755	0	no change	down	no: ATACseq no change, RNAseq down
C2_03140C_A	peak_1988	Promoter (<=1kb)	NA	3642992	0.302755	0.185332	1.001	0	no change	up	no: ATACseq no change, RNAseq up
C1_10530W_A	peak_1175	Promoter (<=1kb)	SNL1	3647192	0.302632	0.196861	-0.626	0.017	no change	down	no: ATACseq no change, RNAseq down
C1_10440W_A	peak_1167	Promoter (<=1kb)	NA	3647180	0.302602	0.187725	-2.721	0	no change	down	no: ATACseq no change, RNAseq down
C7_03250C_A	peak_6030	Promoter (<=1kb)	PDI1	3641367	0.302338	0.089707	0.98	0	no change	up	no: ATACseq no change, RNAseq up
C4_01400W_A	peak_3913	Promoter (<=1kb)	UEC1	3635628	0.302278	0.519922	-2.016	0	no change	down	no: ATACseq no change, RNAseq down
C1_11170W_A	peak_1239	Promoter (<=1kb)	WBP1	3644398	0.302265	0.194071	-0.628	0.008	no change	down	no: ATACseq no change, RNAseq down
C2_01840C_A	peak_1852	Promoter (<=1kb)	RAD7	3635833	0.302095	0.315138	2.556	0	no change	up	no: ATACseq no change, RNAseq up
CR_10410C_A	peak_7479	Promoter (<=1kb)	NA	3638957	0.301377	0.221473	-3.11	0	no change	down	no: ATACseq no change, RNAseq down
C5_02620C_A	peak_4787	Promoter (<=1kb)	NA	3637783	0.301225	0.520209	-0.605	0.003	no change	down	no: ATACseq no change, RNAseq down
C5_02000C_A	peak_4727	Promoter (1-2kb)	ACH1	3643773	0.300872	0.0818058	-1.041	0	no change	down	no: ATACseq no change, RNAseq down
C3_00250C_A	peak_2842	Promoter (<=1kb)	TIM44	3640529	0.300704	0.207641	-1.493	0	no change	down	no: ATACseq no change, RNAseq down
C2_03970W_A	peak_2089	Downstream (<1kb)	NA	3637419	0.156568	0.585631	1.254	0	no change	up	no: ATACseq no change, RNAseq up
C3_03460C_A	peak_3165	Promoter (<=1kb)	NA	3638359	0.30066	0.133631	2.05	0	no change	up	no: ATACseq no change, RNAseq up
C2_01920C_A	peak_1858	Promoter (<=1kb)	NA	3635792	0.30057	0.323921	1.924	0	no change	up	no: ATACseq no change, RNAseq up
C4_06880C_A	peak_4460	Promoter (<=1kb)	NA	30515287	0.300444	0.251739	1.942	0	no change	up	no: ATACseq no change, RNAseq up
C5_05200C_A	peak_5058	Promoter (<=1kb)	NA	3636467	0.300427	0.197874	0.974	0	no change	up	no: ATACseq no change, RNAseq up
C3_01940C_A	peak_3037	Promoter (<=1kb)	NA	3636600	0.300214	0.121165	0.645	0.003	no change	up	no: ATACseq no change, RNAseq up
CR_08750C_A	peak_7223	Promoter (1-2kb)	tG(GCC)6	30515446	0.300163	0.290108	-2.547	0	no change	down	no: ATACseq no change, RNAseq down
C7_00420C_A	peak_5739	Promoter (<=1kb)	NA	3638032	0.299955	0.175296	1.141	0	no change	up	no: ATACseq no change, RNAseq up
C5_05440C_A	peak_5080	Promoter (<=1kb)	NA	3636431	0.299704	0.109446	0.909	0.039	no change	up	no: ATACseq no change, RNAseq up
C3_06860C_A	peak_3596	Promoter (<=1kb)	NA	3638541	0.299614	0.06136	5.147	0	no change	up	no: ATACseq no change, RNAseq up
C3_01350C_A	peak_2975	Promoter (<=1kb)	URA3	3636649	0.298859	0.359752	-2.185	0	no change	down	no: ATACseq no change, RNAseq down
C4_04970C_A	peak_4274	Promoter (<=1kb)	NA	30515274	0.29871	0.574075	-0.443	0.169	no change	no change	same: no change
C2_09820W_A	peak_2677	Promoter (<=1kb)	NA	3643801	0.298587	0.427957	1.483	0	no change	up	no: ATACseq no change, RNAseq up
C1_12230W_A	peak_1357	Promoter (<=1kb)	SNT1	3642033	0.298493	0.518861	-0.581	0.095	no change	no change	same: no change
C4_05140C_A	peak_4289	Promoter (<=1kb)	GDB1	3647409	0.298242	0.0900502	1.163	0	no change	up	no: ATACseq no change, RNAseq up
C2_01110C_A	peak_1772	Promoter (<=1kb)	BCY1	3638832	0.297997	0.144389	1.004	0	no change	up	no: ATACseq no change, RNAseq up
C1_00170W_A	peak_24	Promoter (<=1kb)	LEU4	3639339	0.29788	0.179878	-0.073	0.768	no change	no change	same: no change
C7_01580W_A	peak_5867	Promoter (<=1kb)	SMC6	3637039	0.297206	0.397339	0.577	0.048	no change	up	no: ATACseq no change, RNAseq up
C4_04240C_A	peak_4183	Promoter (<=1kb)	NA	3646856	0.296209	0.149842	-2.445	0	no change	down	no: ATACseq no change, RNAseq down
C4_06910W_A	peak_4464	Promoter (<=1kb)	NA	3642933	0.2962	0.149842	0.468	0.594	no change	no change	same: no change
C1_02120C_A	peak_272	Promoter (<=1kb)	SHA3	3644580	0.295927	0.0904555	-1.848	0.001	no change	down	no: ATACseq no change, RNAseq down
C3_04100W_A	peak_3238	Promoter (<=1kb)	NA	30515201	0.29592	0.121128	0.656	0.119	no change	no change	same: no change
C2_04220C_A	peak_2109	Exon (C2_04210W_A/C2_04210W_A, exon 1 of 1)	TAF14	3637357	-0.1914	0.562167	-0.651	0.005	no change	down	no: ATACseq no change, RNAseq down
C4_01920W_A	peak_3951	Promoter (<=1kb)	DPM3	30515245	0.29589	0.276835	-1.18	0.001	no change	down	no: ATACseq no change, RNAseq down
C3_06850W_A	peak_3590	Promoter (<=1kb)	FCR1	3638542	0.295615	0.0881048	1.291	0	no change	up	no: ATACseq no change, RNAseq up
C3_07950C_A	peak_3751	Promoter (<=1kb)	SRB1	3647454	0.295604	0.0989234	-0.48	0.063	no change	no change	same: no change
C1_12230W_A	peak_1358	Promoter (<=1kb)	SNT1	3642033	0.295316	0.193698	-0.581	0.095	no change	no change	same: no change
C3_04340W_A	peak_3256	Promoter (<=1kb)	ATF1	3635273	0.295223	0.235537	1.916	0	no change	up	no: ATACseq no change, RNAseq up
C4_05400C_A	peak_4307	Promoter (<=1kb)	NA	3646952	0.295018	0.121633	2.106	0	no change	up	no: ATACseq no change, RNAseq up
C1_10160W_A	peak_1124	Promoter (<=1kb)	MIR1	3634782	0.294601	0.111545	-1.232	0	no change	down	no: ATACseq no change, RNAseq down
C3_06290W_A	peak_3511	Promoter (<=1kb)	NA	3642237	0.294171	0.425342	0.549	0.01	no change	up	no: ATACseq no change, RNAseq up
C7_03450C_A	peak_6058	Promoter (<=1kb)	HSM3	3646713	0.293636	0.159184	3.877	0	no change	up	no: ATACseq no change, RNAseq up
CR_02850C_A	peak_6496	Promoter (1-2kb)	GZF3	3642563	0.293565	0.462408	-1.4	0	no change	down	no: ATACseq no change, RNAseq down
C2_03080W_A	peak_1976	Promoter (<=1kb)	IDH2	3642979	0.293415	0.114201	-0.506	0.07	no change	no change	same: no change
CR_03810W_A	peak_6590	Promoter (<=1kb)	PRP13	3643194	0.293285	0.375923	2.307	0	no change	up	no: ATACseq no change, RNAseq up
C6_03170C_A	peak_5430	Promoter (<=1kb)	MDR1	3639260	0.293208	0.0984453	3.779	0	no change	up	no: ATACseq no change, RNAseq up
CR_10000C_A	peak_7424	Promoter (<=1kb)	NA	3639030	0.293137	0.580753	1.85	0	no change	up	no: ATACseq no change, RNAseq up
C5_03490C_A	peak_4881	Promoter (<=1kb)	NA	3646967	0.292878	0.077509	3.9	0	no change	up	no: ATACseq no change, RNAseq up
CR_05600C_A	peak_6757	Promoter (<=1kb)	tC(GCA)1	30515411	0.29276	0.0879049	-1.909	0.062	no change	no change	same: no change
CR_00640W_A	peak_6255	Promoter (<=1kb)	ACC1	3639688	0.292644	0.146208	-1.385	0	no change	down	no: ATACseq no change, RNAseq down
CR_09320C_A	peak_7335	Promoter (<=1kb)	PHO88	3641898	0.292507	0.19255	-0.341	0.201	no change	no change	same: no change
C3_04260W_A	peak_3252	Promoter (<=1kb)	NA	3635140	0.292366	0.301723	1.042	0	no change	up	no: ATACseq no change, RNAseq up
C1_08980C_A	peak_991	Promoter (<=1kb)	ZWF1	3634913	0.291959	0.148135	2.95	0	no change	up	no: ATACseq no change, RNAseq up
C4_05440C_A	peak_4310	Promoter (<=1kb)	NA	3646960	0.291622	0.185229	1.329	0	no change	up	no: ATACseq no change, RNAseq up
CR_01390W_A	peak_6323	Promoter (<=1kb)	MGE1	3640133	0.291543	0.184668	0.482	0.104	no change	no change	same: no change
C6_00340C_A	peak_5142	Promoter (<=1kb)	NA	3646074	0.291438	0.216067	0.206	0.368	no change	no change	same: no change
C4_00840W_A	peak_3835	Promoter (<=1kb)	NA	3635722	0.291428	0.189769	1.468	0	no change	up	no: ATACseq no change, RNAseq up
C2_03110W_A	peak_1983	Promoter (1-2kb)	NA	3642995	0.291356	0.285221	3.571	0	no change	up	no: ATACseq no change, RNAseq up
C6_03360C_A	peak_5447	Promoter (<=1kb)	NA	3639203	0.290912	0.355598	0.086	1	no change	no change	same: no change
C3_06490W_A	peak_3549	Promoter (<=1kb)	NA	3642285	0.290482	0.146176	4.336	0	no change	up	no: ATACseq no change, RNAseq up
C1_10700C_A	peak_1192	Promoter (<=1kb)	NIT3	3644408	0.290335	0.244219	2.957	0	no change	up	no: ATACseq no change, RNAseq up
C3_02920W_A	peak_3111	Promoter (<=1kb)	NA	3638379	0.289373	0.184668	1.886	0	no change	up	no: ATACseq no change, RNAseq up
CR_06010W_A	peak_6817	Promoter (1-2kb)	NA	3644870	0.288772	0.523718	-0.309	0.324	no change	no change	same: no change
C1_01690C_A	peak_214	Exon (C1_01690C_A/C1_01690C_A, exon 1 of 1)	LSC1	3640199	-0.107933	0.816083	-0.431	0.102	no change	no change	same: no change
CR_09670C_A	peak_7382	Promoter (<=1kb)	NA	3647091	0.288742	0.110598	1.928	0	no change	up	no: ATACseq no change, RNAseq up
C2_03040W_A	peak_1970	Promoter (<=1kb)	PLC2	3642985	0.288651	0.232533	0.363	0.122	no change	no change	same: no change
C6_00320C_A	peak_5137	Promoter (<=1kb)	DNA2	3646072	0.28829	0.519028	1.671	0	no change	up	no: ATACseq no change, RNAseq up
C1_07870C_A	peak_871	Promoter (<=1kb)	SMI1	3640741	0.288267	0.125887	-0.112	0.678	no change	no change	same: no change
C7_03870W_A	peak_6089	Promoter (<=1kb)	RAD6	3643143	0.287911	0.140039	1.941	0	no change	up	no: ATACseq no change, RNAseq up
C2_04620W_A	peak_2147	Downstream (2-3kb)	NA	3645438	0.0990399	0.6961	-0.256	0.306	no change	no change	same: no change
C2_04620W_A	peak_2148	Downstream (1-2kb)	NA	3645438	0.215564	0.491408	-0.256	0.306	no change	no change	same: no change
C2_04620W_A	peak_2149	Downstream (1-2kb)	NA	3645438	0.653617	0.148664	-0.256	0.306	no change	no change	same: no change
C5_04810W_A	peak_5006	Promoter (<=1kb)	PFK1	3636448	0.287779	0.118592	1.299	0	no change	up	no: ATACseq no change, RNAseq up
C2_04640C_A	peak_2150	Downstream (1-2kb)	SNU114	3647798	0.0147919	0.961727	-0.84	0.002	no change	down	no: ATACseq no change, RNAseq down
C2_04640C_A	peak_2151	Downstream (<1kb)	SNU114	3647798	-0.188167	0.521835	-0.84	0.002	no change	down	no: ATACseq no change, RNAseq down
C2_05040C_A	peak_2187	Promoter (<=1kb)	NA	3643449	0.287646	0.406106	-1.03	0	no change	down	no: ATACseq no change, RNAseq down
C1_12140W_A	peak_1351	Promoter (<=1kb)	NA	3642050	0.287254	0.231291	2.391	0	no change	up	no: ATACseq no change, RNAseq up
C4_02300W_A	peak_3979	Promoter (<=1kb)	HOS3	3637886	0.287069	0.459236	1.305	0	no change	up	no: ATACseq no change, RNAseq up
C1_03670C_A	peak_428	Promoter (<=1kb)	DAO1	3636885	0.286975	0.509317	-0.115	0.614	no change	no change	same: no change
C4_01390W_A	peak_3910	Promoter (<=1kb)	HAP3	3635629	0.286717	0.322792	0.406	0.25	no change	no change	same: no change
C1_14170W_A	peak_1583	Promoter (<=1kb)	NA	3643323	0.28604	0.255416	0.87	0	no change	up	no: ATACseq no change, RNAseq up
C2_08870C_A	peak_2564	Promoter (1-2kb)	PIR1	3645801	0.285815	0.400229	-0.244	0.423	no change	no change	same: no change
C5_03150W_A	peak_4842	Promoter (<=1kb)	NA	3637799	0.285806	0.388045	-0.751	0.002	no change	down	no: ATACseq no change, RNAseq down
C5_00010W_A	peak_4497	Promoter (1-2kb)	TLO11	3647880	0.285791	0.104536	2.188	0	no change	up	no: ATACseq no change, RNAseq up
CR_10340W_A	peak_7468	Promoter (<=1kb)	PTP3	3638940	0.284942	0.0949247	1.08	0	no change	up	no: ATACseq no change, RNAseq up
C2_06230W_A	peak_2309	Promoter (<=1kb)	NA	3646911	0.284839	0.290671	0.002	0.998	no change	no change	same: no change
C2_07390C_A	peak_2434	Promoter (<=1kb)	NA	3645229	0.284774	0.356863	-0.378	0.108	no change	no change	same: no change
C2_07590W_A	peak_2451	Promoter (<=1kb)	VMA10	3645215	0.283816	0.184668	0.265	0.317	no change	no change	same: no change
C2_04850C_A	peak_2164	Exon (C2_04850C_A/C2_04850C_A, exon 2 of 2)	NA	3648114	0.0569805	0.902739	1.437	0	no change	up	no: ATACseq no change, RNAseq up
C2_09590C_A	peak_2657	Promoter (<=1kb)	NA	3643800	0.283522	0.114968	2.249	0	no change	up	no: ATACseq no change, RNAseq up
C1_11690W_A	peak_1295	Promoter (<=1kb)	NA	3645322	0.283432	0.227607	0.84	0.005	no change	up	no: ATACseq no change, RNAseq up
CR_05780W_A	peak_6782	Promoter (<=1kb)	VMA2	3646710	0.283293	0.427826	0.026	0.928	no change	no change	same: no change
C6_03670C_A	peak_5484	Promoter (<=1kb)	NA	NA	0.282948	0.135948	1.875	0	no change	up	no: ATACseq no change, RNAseq up
C2_00740C_A	peak_1734	Promoter (<=1kb)	NA	3638912	0.282849	0.150777	2.061	0	no change	up	no: ATACseq no change, RNAseq up
C1_09320C_A	peak_1039	Promoter (1-2kb)	NA	3634834	0.282641	0.275882	-0.824	0.001	no change	down	no: ATACseq no change, RNAseq down
C6_01540C_A	peak_5274	Promoter (<=1kb)	NA	30515333	0.282326	0.0734788	-1.137	0.006	no change	down	no: ATACseq no change, RNAseq down
C7_01640W_A	peak_5870	Promoter (<=1kb)	LAT1	3636986	0.282209	0.165178	-0.099	0.775	no change	no change	same: no change
C2_04920W_A	peak_2173	Exon (C2_04930C_A/C2_04930C_A, exon 1 of 1)	tG(GCC)3	30515115	-0.34968	0.40663	0.326	0.65	no change	no change	same: no change
C2_03790C_A	peak_2075	Promoter (<=1kb)	ASR3	3637402	0.281501	0.207966	3.374	0	no change	up	no: ATACseq no change, RNAseq up
C2_04940C_A	peak_2175	Exon (C2_04940C_A/C2_04940C_A, exon 1 of 1)	ITR1	3643440	0.0560688	0.918892	2.194	0	no change	up	no: ATACseq no change, RNAseq up
C5_04950C_A	peak_5033	Promoter (1-2kb)	NA	3636422	0.281409	0.33304	-0.513	0.221	no change	no change	same: no change
C2_05250C_A	peak_2206	Promoter (<=1kb)	AAT1	3643468	0.281403	0.163889	-0.859	0.009	no change	down	no: ATACseq no change, RNAseq down
C2_04950C_A	peak_2178	Exon (C2_04950C_A/C2_04950C_A, exon 1 of 1)	CYT1	3643441	-0.450625	0.104926	-0.805	0.001	no change	down	no: ATACseq no change, RNAseq down
C2_09520C_A	peak_2647	Promoter (1-2kb)	CCT2	3643815	0.280583	0.159184	-0.725	0.002	no change	down	no: ATACseq no change, RNAseq down
C6_02100W_A	peak_5335	Promoter (1-2kb)	NA	3647554	0.280417	0.311793	6.456	0	no change	up	no: ATACseq no change, RNAseq up
C1_11530C_A	peak_1283	Promoter (<=1kb)	NA	3645334	0.280307	0.210125	4.002	0	no change	up	no: ATACseq no change, RNAseq up
C2_06370C_A	peak_2319	Promoter (<=1kb)	SCP1	3646554	0.279908	0.448346	-0.777	0.13	no change	no change	same: no change
CR_06090W_A	peak_6825	Promoter (<=1kb)	NA	6335359	0.279487	0.531726	2.378	0	no change	up	no: ATACseq no change, RNAseq up
CR_03200C_A	peak_6535	Promoter (<=1kb)	NA	3645131	0.279055	0.485012	-2.202	0	no change	down	no: ATACseq no change, RNAseq down
CR_02920C_A	peak_6506	Promoter (<=1kb)	AQY1	3642587	0.278867	0.207641	-0.556	0.463	no change	no change	same: no change
C3_03470W_A	peak_3166	Promoter (<=1kb)	NA	3638306	0.278854	0.563791	0.126	0.722	no change	no change	same: no change
C2_05190W_A	peak_2203	Promoter (<=1kb)	CDC21	3643463	0.278723	0.250292	1.048	0	no change	up	no: ATACseq no change, RNAseq up
C2_03620W_A	peak_2058	Promoter (<=1kb)	IFK2	3637439	0.27832	0.305931	3.211	0	no change	up	no: ATACseq no change, RNAseq up
C2_05070W_A	peak_2189	Exon (C2_05070W_A/C2_05070W_A, exon 1 of 1)	FRE9	3643452	0.725338	0.0184886	3.663	0	up	up	same: up
C1_09030C_A	peak_997	Promoter (<=1kb)	COX5	3634768	0.278224	0.294263	-0.326	0.215	no change	no change	same: no change
C7_00080C_A	peak_5695	Promoter (<=1kb)	SAC7	3638010	0.278018	0.267242	-0.975	0.016	no change	down	no: ATACseq no change, RNAseq down
C3_03100C_A	peak_3124	Promoter (<=1kb)	NA	3638399	0.277812	0.472082	0.546	0.007	no change	up	no: ATACseq no change, RNAseq up
C4_02720C_A	peak_4034	Promoter (<=1kb)	NA	3637857	0.277492	0.085402	0.967	0	no change	up	no: ATACseq no change, RNAseq up
C2_05130W_A	peak_2193	Exon (C2_05130W_A/C2_05130W_A, exon 1 of 1)	NA	3643458	-0.614586	0.106784	1.9	0	no change	up	no: ATACseq no change, RNAseq up
C2_05130W_A	peak_2194	Exon (C2_05130W_A/C2_05130W_A, exon 1 of 1)	NA	3643458	-0.320626	0.354085	1.9	0	no change	up	no: ATACseq no change, RNAseq up
C2_08910C_A	peak_2570	Promoter (<=1kb)	NA	3645798	0.277428	0.26524	0.26	0.268	no change	no change	same: no change
C2_06600W_A	peak_2349	Promoter (<=1kb)	NA	3646563	0.277246	0.0966605	0.545	0.057	no change	no change	same: no change
C4_03940C_A	peak_4152	Promoter (<=1kb)	PYC2	3637323	0.277242	0.175689	0.881	0.006	no change	up	no: ATACseq no change, RNAseq up
C2_05150W_A	peak_2198	Exon (C2_05150W_A/C2_05150W_A, exon 1 of 1)	PEX2	3643460	-0.373529	0.440312	0.865	0	no change	up	no: ATACseq no change, RNAseq up
C2_05150W_A	peak_2199	Exon (C2_05150W_A/C2_05150W_A, exon 1 of 1)	PEX2	3643460	-0.759647	0.0905382	0.865	0	no change	up	no: ATACseq no change, RNAseq up
C4_02400C_A	peak_4000	Promoter (<=1kb)	NA	3637851	0.27709	0.394036	-1.066	0	no change	down	no: ATACseq no change, RNAseq down
C2_08260W_A	peak_2512	Promoter (<=1kb)	NA	3642345	0.276921	0.475355	3.86	0	no change	up	no: ATACseq no change, RNAseq up
C2_01900C_A	peak_1857	Promoter (<=1kb)	NA	3635789	0.276399	0.398019	0.862	0	no change	up	no: ATACseq no change, RNAseq up
C2_05170W_A	peak_2201	Exon (C2_05170W_A/C2_05170W_A, exon 1 of 1)	NA	3643462	-0.117417	0.589271	0.846	0	no change	up	no: ATACseq no change, RNAseq up
C1_01350C_A	peak_172	Promoter (<=1kb)	TIF	3640190	0.276338	0.198025	-1.969	0	no change	down	no: ATACseq no change, RNAseq down
C2_09770C_A	peak_2671	Promoter (<=1kb)	INP51	3643806	0.275309	0.496448	0.921	0	no change	up	no: ATACseq no change, RNAseq up
C1_14360C_A	peak_1616	Promoter (<=1kb)	WSC4	3643282	0.275041	0.255295	-1.1	0	no change	down	no: ATACseq no change, RNAseq down
C2_03060W_A	peak_1972	Promoter (<=1kb)	PR26	3642981	0.274807	0.226214	2.203	0	no change	up	no: ATACseq no change, RNAseq up
C2_01120W_A	peak_1773	Promoter (<=1kb)	KAR2	3638830	0.27452	0.131519	0.173	0.546	no change	no change	same: no change
CR_09950C_A	peak_7419	Promoter (<=1kb)	SIK1	3638925	0.274379	0.460179	-2.511	0	no change	down	no: ATACseq no change, RNAseq down
C3_07090W_A	peak_3621	Promoter (<=1kb)	HHT1	3638444	0.274375	0.116825	1.065	0	no change	up	no: ATACseq no change, RNAseq up
C5_03450W_A	peak_4875	Promoter (<=1kb)	NA	30515311	0.273853	0.188934	0.95	0.12	no change	no change	same: no change
C3_05780C_A	peak_3452	Promoter (1-2kb)	CRZ1	3641722	0.273633	0.209608	-0.691	0.002	no change	down	no: ATACseq no change, RNAseq down
C2_00750W_A	peak_1735	Promoter (<=1kb)	NA	3638911	0.2729	0.37086	2.297	0	no change	up	no: ATACseq no change, RNAseq up
C7_02790C_A	peak_5991	Promoter (<=1kb)	POL3	3641359	0.272483	0.349087	1.277	0	no change	up	no: ATACseq no change, RNAseq up
CR_09240C_A	peak_7326	Promoter (<=1kb)	NA	3641919	0.272467	0.160395	-0.271	0.308	no change	no change	same: no change
C2_01290C_A	peak_1792	Promoter (1-2kb)	tL(UAA)1	30515089	0.272116	0.415149	-1.75	0.022	no change	down	no: ATACseq no change, RNAseq down
CR_08700C_A	peak_7206	Promoter (<=1kb)	ARF1	3642130	0.272008	0.395193	0.773	0.005	no change	up	no: ATACseq no change, RNAseq up
C5_00590W_A	peak_4591	Promoter (<=1kb)	PET9	3641587	0.272002	0.097121	-1.679	0	no change	down	no: ATACseq no change, RNAseq down
C1_13010W_A	peak_1422	Promoter (<=1kb)	NA	3636120	0.271898	0.231291	-1.264	0	no change	down	no: ATACseq no change, RNAseq down
C6_03290W_A	peak_5440	Promoter (<=1kb)	NA	3639195	0.271465	0.501865	1.264	0.002	no change	up	no: ATACseq no change, RNAseq up
C7_00730W_A	peak_5774	Promoter (<=1kb)	MET28	3637962	0.271449	0.106112	0.818	0.002	no change	up	no: ATACseq no change, RNAseq up
C5_04070C_A	peak_4942	Promoter (<=1kb)	CKS1	3647732	0.271424	0.511191	-1.155	0	no change	down	no: ATACseq no change, RNAseq down
CR_02500W_A	peak_6434	Promoter (<=1kb)	NA	3647696	0.271106	0.609136	-0.073	0.794	no change	no change	same: no change
C4_02310W_A	peak_3980	Promoter (<=1kb)	BEM3	3637885	0.27096	0.674036	0.709	0.013	no change	up	no: ATACseq no change, RNAseq up
C4_01720C_A	peak_3936	Promoter (<=1kb)	NA	3635589	0.269342	0.250002	-1.612	0	no change	down	no: ATACseq no change, RNAseq down
CR_02090C_A	peak_6388	Promoter (<=1kb)	CET1	3640140	0.269328	0.272065	-0.107	0.677	no change	no change	same: no change
C1_04760C_A	peak_551	Promoter (<=1kb)	SYG1	3644777	0.269134	0.290475	-1.176	0	no change	down	no: ATACseq no change, RNAseq down
C2_05450C_A	peak_2224	Downstream (<1kb)	MDJ2	3643437	0.9848	0.0160319	0.115	0.713	up	no change	no: ATACseq up, RNAseq no change
C6_00740W_A	peak_5180	Promoter (<=1kb)	FAT1	3647083	0.269099	0.221369	0.432	0.05	no change	no change	same: no change
CR_02300C_A	peak_6417	Promoter (<=1kb)	NA	3644938	0.269021	0.379807	0.99	0	no change	up	no: ATACseq no change, RNAseq up
C1_10420C_A	peak_1166	Promoter (<=1kb)	NA	3647178	0.268897	0.321277	0.309	0.184	no change	no change	same: no change
C2_05470W_A	peak_2228	Exon (C2_05470W_A/C2_05470W_A, exon 1 of 1)	COQ5	3643416	-0.289237	0.443012	-0.83	0	no change	down	no: ATACseq no change, RNAseq down
C2_05470W_A	peak_2229	Exon (C2_05470W_A/C2_05470W_A, exon 1 of 1)	COQ5	3643416	-0.227614	0.590894	-0.83	0	no change	down	no: ATACseq no change, RNAseq down
C2_05480C_A	peak_2230	Exon (C2_05480C_A/C2_05480C_A, exon 1 of 1)	NA	30515123	-0.197109	0.591728	-1.286	0.001	no change	down	no: ATACseq no change, RNAseq down
CR_00760C_A	peak_6266	Promoter (<=1kb)	HYR4	3640436	0.268368	0.439112	0.18	0.485	no change	no change	same: no change
C2_05500W_A	peak_2232	Exon (C2_05510C_A/C2_05510C_A, exon 1 of 1)	ATP4	3643418	0.121167	0.721799	-0.147	0.624	no change	no change	same: no change
C1_00530C_A	peak_76	Promoter (<=1kb)	NA	3639368	0.267562	0.184668	1.301	0	no change	up	no: ATACseq no change, RNAseq up
C4_00560C_A	peak_3808	Promoter (<=1kb)	MMM1	3645744	0.267191	0.425537	0.542	0.065	no change	no change	same: no change
CR_03040C_A	peak_6523	Promoter (<=1kb)	HGT18	3645111	0.26683	0.31863	0.237	0.437	no change	no change	same: no change
CR_05290W_A	peak_6718	Promoter (<=1kb)	MNT3	3648123	0.266817	0.718481	0.13	0.759	no change	no change	same: no change
C1_11360W_A	peak_1259	Promoter (<=1kb)	RPL37B	30515053	0.266661	0.140039	-1.668	0	no change	down	no: ATACseq no change, RNAseq down
C6_00330C_A	peak_5140	Promoter (<=1kb)	GNP1	3646073	0.266648	0.0970066	0.838	0.001	no change	up	no: ATACseq no change, RNAseq up
C2_10210C_A	peak_2717	Promoter (<=1kb)	RAS1	3643927	0.266314	0.0979504	-0.178	0.519	no change	no change	same: no change
C4_00950C_A	peak_3851	Promoter (<=1kb)	NA	3635675	0.266299	0.129143	0.788	0.005	no change	up	no: ATACseq no change, RNAseq up
C1_09320C_A	peak_1038	Promoter (<=1kb)	NA	3634834	0.265909	0.196929	-0.824	0.001	no change	down	no: ATACseq no change, RNAseq down
C2_05580W_A	peak_2242	Exon (C2_05580W_A/C2_05580W_A, exon 1 of 1)	NA	3645563	-0.399681	0.0975938	-0.988	0	no change	down	no: ATACseq no change, RNAseq down
C1_04100C_A	peak_482	Promoter (<=1kb)	POR1	3644698	0.265464	0.292615	-0.342	0.189	no change	no change	same: no change
C2_09010W_A	peak_2584	Promoter (<=1kb)	STB3	3645781	0.264966	0.200032	1.723	0	no change	up	no: ATACseq no change, RNAseq up
C4_06990W_A	peak_4466	Promoter (<=1kb)	MNN46	3642968	0.264933	0.332318	-2.005	0	no change	down	no: ATACseq no change, RNAseq down
C2_05610C_A	peak_2246	Exon (C2_05610C_A/C2_05610C_A, exon 1 of 1)	RPS8A	3645565	-0.350393	0.349678	-1.902	0	no change	down	no: ATACseq no change, RNAseq down
C5_00640C_A	peak_4595	Promoter (<=1kb)	SAM51	3641582	0.26434	0.359659	0.149	0.632	no change	no change	same: no change
C1_03320C_A	peak_396	Promoter (<=1kb)	EHD3	3636858	0.263584	0.232533	1.23	0	no change	up	no: ATACseq no change, RNAseq up
C4_00600C_A	peak_3814	Promoter (<=1kb)	MUC1	3645771	0.263584	0.535675	1.187	0	no change	up	no: ATACseq no change, RNAseq up
C1_00650C_A	peak_86	Promoter (<=1kb)	SNF7	3639377	0.262798	0.471161	1.607	0	no change	up	no: ATACseq no change, RNAseq up
CR_05600C_A	peak_6755	Promoter (<=1kb)	tC(GCA)1	30515411	0.262338	0.285819	-1.909	0.062	no change	no change	same: no change
CR_08460W_A	peak_7135	Promoter (<=1kb)	TPM2	30515441	0.262016	0.597091	0.021	0.953	no change	no change	same: no change
C2_10670W_A	peak_2780	Promoter (<=1kb)	NA	3641251	0.261995	0.323921	2.041	0	no change	up	no: ATACseq no change, RNAseq up
C2_06910W_A	peak_2397	Promoter (<=1kb)	YPT72	3643523	0.261981	0.389636	0.291	0.197	no change	no change	same: no change
C2_05640W_A	peak_2254	Distal Intergenic	NA	3645566	0.0582193	0.796362	-1.682	0	no change	down	no: ATACseq no change, RNAseq down
C2_05640W_A	peak_2255	Distal Intergenic	NA	3645566	-0.132117	0.550753	-1.682	0	no change	down	no: ATACseq no change, RNAseq down
C6_02250W_A	peak_5350	Promoter (<=1kb)	NA	3645869	0.26172	0.347736	0.077	0.884	no change	no change	same: no change
C1_13130C_A	peak_1439	Promoter (<=1kb)	NA	3636202	0.261615	0.161193	-1.702	0	no change	down	no: ATACseq no change, RNAseq down
C4_01860C_A	peak_3948	Promoter (<=1kb)	NA	3635590	0.261017	0.237177	0.592	0.04	no change	up	no: ATACseq no change, RNAseq up
C3_00430W_A	peak_2859	Promoter (<=1kb)	EST3	3640551	0.260881	0.502931	1.089	0.001	no change	up	no: ATACseq no change, RNAseq up
C3_05570W_A	peak_3423	Promoter (<=1kb)	QDR2	3643661	0.260844	0.275882	2.984	0	no change	up	no: ATACseq no change, RNAseq up
C2_05640W_A	peak_2260	Exon (C2_05640W_A/C2_05640W_A, exon 1 of 1)	NA	3645566	-0.424324	0.0870585	-1.682	0	no change	down	no: ATACseq no change, RNAseq down
C2_05640W_A	peak_2261	Exon (C2_05640W_A/C2_05640W_A, exon 1 of 1)	NA	3645566	-0.228505	0.510496	-1.682	0	no change	down	no: ATACseq no change, RNAseq down
C4_01530C_A	peak_3920	Promoter (<=1kb)	ERG251	3635716	0.260741	0.130443	0.45	0.209	no change	no change	same: no change
CR_00570W_A	peak_6250	Promoter (<=1kb)	NA	3639664	0.260681	0.42384	-1.591	0	no change	down	no: ATACseq no change, RNAseq down
C2_05660W_A	peak_2264	Exon (C2_05660W_A/C2_05660W_A, exon 1 of 1)	PNG2	3645568	-0.415213	0.178238	1.144	0	no change	up	no: ATACseq no change, RNAseq up
C2_05660W_A	peak_2265	Exon (C2_05660W_A/C2_05660W_A, exon 1 of 1)	PNG2	3645568	-0.349568	0.261642	1.144	0	no change	up	no: ATACseq no change, RNAseq up
C1_08320W_A	peak_925	Promoter (<=1kb)	TKL1	3640767	0.260306	0.175689	1.37	0	no change	up	no: ATACseq no change, RNAseq up
C4_00150C_A	peak_3770	Promoter (<=1kb)	PEX5	3645026	0.260296	0.213694	2.725	0	no change	up	no: ATACseq no change, RNAseq up
C2_05710C_A	peak_2268	Exon (C2_05700W_A/C2_05700W_A, exon 1 of 1)	NA	30515127	0.384178	0.0825385	-1.997	0	no change	down	no: ATACseq no change, RNAseq down
C4_03350C_A	peak_4090	Promoter (<=1kb)	AIF1	3646794	0.260246	0.392822	0.578	0.08	no change	no change	same: no change
CR_10130W_A	peak_7438	Promoter (<=1kb)	NA	3638970	0.259781	0.271873	0.155	0.516	no change	no change	same: no change
C2_02230C_A	peak_1893	Promoter (<=1kb)	NA	3635775	0.259769	0.569841	-0.097	0.936	no change	no change	same: no change
C2_01620W_A	peak_1823	Promoter (<=1kb)	COX4	3635737	0.259531	0.174205	-0.753	0.004	no change	down	no: ATACseq no change, RNAseq down
C1_06870C_A	peak_759	Promoter (<=1kb)	NA	30515013	0.259044	0.580629	0.553	0.185	no change	no change	same: no change
C2_00380C_A	peak_1701	Promoter (<=1kb)	RFA1	3638823	0.259036	0.330205	1.218	0	no change	up	no: ATACseq no change, RNAseq up
CR_02510W_A	peak_6436	Promoter (<=1kb)	NA	3647694	0.258732	0.198902	1.204	0	no change	up	no: ATACseq no change, RNAseq up
C1_09010W_A	peak_994	Promoter (<=1kb)	NAR1	3634916	0.258281	0.228553	3.58	0	no change	up	no: ATACseq no change, RNAseq up
C3_03340C_A	peak_3146	Promoter (<=1kb)	NA	30515195	0.258265	0.386638	-0.256	0.299	no change	no change	same: no change
C1_04460C_A	peak_518	Promoter (<=1kb)	NA	3646140	0.258191	0.250113	1.382	0	no change	up	no: ATACseq no change, RNAseq up
CR_09340W_A	peak_7338	Promoter (<=1kb)	NA	3641900	0.258083	0.187776	1.543	0	no change	up	no: ATACseq no change, RNAseq up
C4_01360W_A	peak_3903	Promoter (<=1kb)	PGA53	3635599	0.257752	0.192111	-1.162	0	no change	down	no: ATACseq no change, RNAseq down
C7_01910C_A	peak_5903	Promoter (<=1kb)	NA	3637029	0.25764	0.401354	-1.015	0.001	no change	down	no: ATACseq no change, RNAseq down
C2_06440C_A	peak_2330	Promoter (<=1kb)	NA	3646565	0.257479	0.158186	0.415	0.066	no change	no change	same: no change
C3_01160W_A	peak_2952	Promoter (<=1kb)	MSS4	3647957	0.25743	0.326983	-0.164	0.538	no change	no change	same: no change
CR_04810W_A	peak_6672	Promoter (<=1kb)	RPS3	3647299	0.256958	0.400283	-2.239	0	no change	down	no: ATACseq no change, RNAseq down
C2_06560W_A	peak_2342	Promoter (<=1kb)	NA	30515139	0.256677	0.148188	0.773	0.188	no change	no change	same: no change
C4_00170W_A	peak_3772	Promoter (<=1kb)	NA	3645028	0.256613	0.177619	0.569	0.031	no change	up	no: ATACseq no change, RNAseq up
C6_00270W_A	peak_5123	Promoter (<=1kb)	NA	3646066	0.256489	0.436618	0.625	0.002	no change	up	no: ATACseq no change, RNAseq up
C1_02120C_A	peak_273	Promoter (<=1kb)	SHA3	3644580	0.256075	0.0981022	-1.848	0.001	no change	down	no: ATACseq no change, RNAseq down
C4_02360W_A	peak_3986	Promoter (<=1kb)	AMS1	3637882	0.255443	0.222674	1.83	0	no change	up	no: ATACseq no change, RNAseq up
C2_05910W_A	peak_2288	Exon (C2_05910W_A/C2_05910W_A, exon 1 of 1)	NA	3647476	-0.335392	0.140039	-0.424	0.154	no change	no change	same: no change
C1_09520C_A	peak_1053	Promoter (<=1kb)	NA	3634766	0.255285	0.407193	0.995	0	no change	up	no: ATACseq no change, RNAseq up
C1_01750W_A	peak_229	Exon (C1_01750W_A/C1_01750W_A, exon 1 of 1)	NA	3645413	-0.552398	0.22932	0.856	0	no change	up	no: ATACseq no change, RNAseq up
C1_14450C_A	peak_1633	Promoter (<=1kb)	NA	3643299	0.254143	0.518545	0.728	0.064	no change	no change	same: no change
C5_04080C_A	peak_4943	Promoter (<=1kb)	NA	3647731	0.254015	0.259341	-0.234	0.569	no change	no change	same: no change
C7_04270C_A	peak_6149	Promoter (<=1kb)	UFE1	3643174	0.253992	0.264439	0.901	0	no change	up	no: ATACseq no change, RNAseq up
C3_01240C_A	peak_2962	Promoter (<=1kb)	tR(CCU)1	30515177	0.253907	0.356621	-1.011	0.193	no change	no change	same: no change
C1_14150C_A	peak_1581	Promoter (<=1kb)	PAM16	3643321	0.2536	0.197874	-0.851	0	no change	down	no: ATACseq no change, RNAseq down
C2_06000W_A	peak_2295	Exon (C2_06000W_A/C2_06000W_A, exon 1 of 1)	LAS1	3644073	-1.18766	0.0311402	-2.652	0	down	down	same: down
CR_07710W_A	peak_6995	Promoter (<=1kb)	ARO2	3648190	0.25345	0.441546	-0.261	0.314	no change	no change	same: no change
C2_08850C_A	peak_2560	Promoter (<=1kb)	NA	3643890	0.253316	0.29536	-0.661	0.003	no change	down	no: ATACseq no change, RNAseq down
C6_01910W_A	peak_5313	Promoter (<=1kb)	ADK1	3644533	0.252953	0.143547	-1.187	0	no change	down	no: ATACseq no change, RNAseq down
C1_14310W_A	peak_1603	Promoter (<=1kb)	NA	3643315	0.252874	0.207641	1.207	0	no change	up	no: ATACseq no change, RNAseq up
C1_00160C_A	peak_23	Exon (C1_00160C_A/C1_00160C_A, exon 1 of 1)	NA	3639341	-0.470845	0.179825	-2.748	0	no change	down	no: ATACseq no change, RNAseq down
C1_14130W_A	peak_1573	Promoter (1-2kb)	FTR1	3643318	0.252374	0.164378	-1.675	0	no change	down	no: ATACseq no change, RNAseq down
C1_08230C_A	peak_915	Promoter (<=1kb)	PLB5	3640750	0.25192	0.382613	-0.031	0.933	no change	no change	same: no change
C2_02040W_A	peak_1875	Promoter (<=1kb)	NA	3635848	0.251823	0.393812	0.13	0.567	no change	no change	same: no change
C2_01340W_A	peak_1799	Promoter (<=1kb)	NA	3638844	0.251798	0.234503	-0.128	0.657	no change	no change	same: no change
C6_00920W_A	peak_5220	Promoter (<=1kb)	NA	3644031	0.2517	0.21317	1.567	0	no change	up	no: ATACseq no change, RNAseq up
C2_06140C_A	peak_2305	Exon (C2_06140C_A/C2_06140C_A, exon 1 of 1)	NA	3644082	0.675037	0.00985524	1.92	0	up	up	same: up
C2_07400C_A	peak_2435	Promoter (<=1kb)	2001-04-01	3645204	0.251655	0.195214	2.314	0	no change	up	no: ATACseq no change, RNAseq up
C3_04530C_A	peak_3279	Promoter (<=1kb)	TEC1	3635261	0.251526	0.124624	-0.675	0.002	no change	down	no: ATACseq no change, RNAseq down
C5_03860W_A	peak_4907	Promoter (<=1kb)	HAM1	3647224	0.251513	0.496973	1.636	0	no change	up	no: ATACseq no change, RNAseq up
CR_07240C_A	peak_6948	Promoter (<=1kb)	CLG1	3646030	0.251439	0.146915	-1.462	0	no change	down	no: ATACseq no change, RNAseq down
C2_01300C_A	peak_1795	Promoter (<=1kb)	MNN24	3638789	0.251397	0.592242	-0.561	0.083	no change	no change	same: no change
C1_01930W_A	peak_245	Promoter (<=1kb)	NA	30514966	0.251268	0.665472	1.237	0	no change	up	no: ATACseq no change, RNAseq up
C4_04780W_A	peak_4249	Promoter (<=1kb)	PMT6	3641116	0.250203	0.185433	-0.365	0.095	no change	no change	same: no change
C1_00700W_A	peak_91	Promoter (<=1kb)	NA	3639330	0.24963	0.444448	-0.609	0.063	no change	no change	same: no change
C2_00770W_A	peak_1737	Promoter (<=1kb)	NA	3638909	0.248768	0.322578	3.709	0	no change	up	no: ATACseq no change, RNAseq up
C1_08380W_A	peak_941	Promoter (<=1kb)	TEF2	3646502	0.248572	0.499613	-1.659	0	no change	down	no: ATACseq no change, RNAseq down
C1_04950C_A	peak_567	Promoter (<=1kb)	RPM2	3644790	0.248531	0.172974	0.778	0.006	no change	up	no: ATACseq no change, RNAseq up
C1_00740C_A	peak_95	Promoter (<=1kb)	SPE1	3639327	0.248322	0.373024	-1.599	0	no change	down	no: ATACseq no change, RNAseq down
C7_01800C_A	peak_5894	Promoter (<=1kb)	PFK2	3637056	0.248128	0.141607	1.501	0	no change	up	no: ATACseq no change, RNAseq up
C1_09230C_A	peak_1028	Promoter (<=1kb)	GRP1	3634899	0.247756	0.322801	0.153	0.539	no change	no change	same: no change
C1_06800W_A	peak_750	Promoter (<=1kb)	NA	3639496	0.247311	0.468202	-1.038	0	no change	down	no: ATACseq no change, RNAseq down
C3_02790W_A	peak_3105	Promoter (<=1kb)	NA	3638416	0.24685	0.322638	-0.989	0.042	no change	down	no: ATACseq no change, RNAseq down
C4_01300W_A	peak_3894	Promoter (<=1kb)	NA	3635605	0.246747	0.201357	-0.89	0.005	no change	down	no: ATACseq no change, RNAseq down
C3_03490W_A	peak_3169	Promoter (<=1kb)	RSN1	3638308	0.246681	0.158278	1.171	0.037	no change	up	no: ATACseq no change, RNAseq up
C2_06410W_A	peak_2322	Downstream (<1kb)	NA	30515136	0.0522066	0.890511	-0.38	0.405	no change	no change	same: no change
C5_02190C_A	peak_4746	Promoter (<=1kb)	NA	30515303	0.246664	0.345152	-0.536	0.03	no change	down	no: ATACseq no change, RNAseq down
C4_06060W_A	peak_4375	Promoter (<=1kb)	VPS13	3646528	0.24629	0.342648	1.485	0	no change	up	no: ATACseq no change, RNAseq up
C1_00660C_A	peak_88	Promoter (<=1kb)	NA	3639376	0.246076	0.526676	1.081	0	no change	up	no: ATACseq no change, RNAseq up
C2_06430C_A	peak_2326	Exon (C2_06430C_A/C2_06430C_A, exon 1 of 1)	NA	3646558	0.34548	0.0623183	1.755	0	no change	up	no: ATACseq no change, RNAseq up
C1_13220C_A	peak_1450	Promoter (<=1kb)	AKR1	3636166	0.245771	0.294263	0.105	0.71	no change	no change	same: no change
C1_05930C_A	peak_661	Promoter (<=1kb)	NA	3639862	0.245769	0.658622	-0.299	0.332	no change	no change	same: no change
C2_03470C_A	peak_2031	Promoter (<=1kb)	COX6	30515099	0.245578	0.190856	-0.706	0.005	no change	down	no: ATACseq no change, RNAseq down
C2_00060C_A	peak_1662	Promoter (<=1kb)	NA	3647914	0.245261	0.4462	-0.081	0.873	no change	no change	same: no change
C3_07670W_A	peak_3707	Promoter (<=1kb)	NA	3638460	0.244968	0.267154	-1.019	0	no change	down	no: ATACseq no change, RNAseq down
C1_10270C_A	peak_1139	Promoter (<=1kb)	SFH5	3634884	0.244786	0.549439	0.557	0.01	no change	up	no: ATACseq no change, RNAseq up
C1_05170C_A	peak_605	Promoter (<=1kb)	CUE5	3642467	0.244708	0.518906	1.631	0	no change	up	no: ATACseq no change, RNAseq up
CR_02620C_A	peak_6446	Promoter (<=1kb)	NA	3642567	0.244618	0.368418	-0.345	0.158	no change	no change	same: no change
C5_01800C_A	peak_4706	Promoter (<=1kb)	HIP1	3643761	0.244409	0.356941	-0.024	0.92	no change	no change	same: no change
C1_01920W_A	peak_242	Promoter (<=1kb)	ROA1	3645424	0.244112	0.18032	-0.2	0.463	no change	no change	same: no change
C1_09680W_A	peak_1075	Promoter (<=1kb)	MTS1	3634873	0.243887	0.383195	-1.26	0	no change	down	no: ATACseq no change, RNAseq down
C1_14030W_A	peak_1560	Promoter (<=1kb)	NA	3643340	0.243723	0.351715	3.314	0	no change	up	no: ATACseq no change, RNAseq up
C7_02850W_A	peak_6001	Promoter (<=1kb)	NA	3641399	0.243366	0.231291	0.648	0.001	no change	up	no: ATACseq no change, RNAseq up
C5_02380W_A	peak_4769	Promoter (<=1kb)	NA	3637794	0.243177	0.178541	3.289	0	no change	up	no: ATACseq no change, RNAseq up
C4_01210C_A	peak_3884	Promoter (<=1kb)	tS(UGA)3	30515235	0.24287	0.675838	-2.031	0.005	no change	down	no: ATACseq no change, RNAseq down
C6_00130C_A	peak_5102	Promoter (<=1kb)	VID27	3647894	0.242786	0.386197	2.093	0	no change	up	no: ATACseq no change, RNAseq up
CR_04520W_A	peak_6655	Promoter (<=1kb)	MIM1	30515394	0.242743	0.301911	0.42	0.1	no change	no change	same: no change
C7_03020C_A	peak_6011	Promoter (<=1kb)	DUG3	3641381	0.242173	0.221572	2.443	0	no change	up	no: ATACseq no change, RNAseq up
C3_07270C_A	peak_3640	Promoter (<=1kb)	UBI4	3638432	0.242167	0.137253	2.812	0	no change	up	no: ATACseq no change, RNAseq up
CR_09590W_A	peak_7370	Promoter (<=1kb)	NA	3647095	0.241932	0.373986	-0.981	0.002	no change	down	no: ATACseq no change, RNAseq down
C2_06590C_A	peak_2347	Distal Intergenic	GIT1	3646562	0.444505	0.0114632	-0.615	0.306	up	no change	no: ATACseq up, RNAseq no change
C1_01280C_A	peak_168	Promoter (<=1kb)	MED22	3640217	0.241818	0.5948	1.188	0.001	no change	up	no: ATACseq no change, RNAseq up
C3_07640C_A	peak_3703	Promoter (<=1kb)	FUM12	3638489	0.241615	0.24626	0.517	0.069	no change	no change	same: no change
C5_04630W_A	peak_4988	Promoter (<=1kb)	NA	3636395	0.241369	0.594244	-0.166	0.498	no change	no change	same: no change
C2_06610C_A	peak_2350	Downstream (<1kb)	NA	30515140	-0.0572983	0.819073	0.693	0.003	no change	up	no: ATACseq no change, RNAseq up
C2_06610C_A	peak_2351	Exon (C2_06610C_A/C2_06610C_A, exon 1 of 1)	NA	30515140	0.0750321	0.802263	0.693	0.003	no change	up	no: ATACseq no change, RNAseq up
C2_10460C_A	peak_2746	Promoter (<=1kb)	NA	3641195	0.24123	0.218306	0.198	0.448	no change	no change	same: no change
C2_06460W_A	peak_2334	Promoter (<=1kb)	RTA3	3646566	0.241084	0.258608	0.572	0.016	no change	up	no: ATACseq no change, RNAseq up
C2_06630C_A	peak_2354	Downstream (<1kb)	NA	30515141	-0.0594557	0.918892	1.538	0.006	no change	up	no: ATACseq no change, RNAseq up
C2_06630C_A	peak_2355	Downstream (<1kb)	NA	30515141	-0.120895	0.663657	1.538	0.006	no change	up	no: ATACseq no change, RNAseq up
CR_07530C_A	peak_6979	Promoter (1-2kb)	ECM22	3648000	0.240977	0.153969	0.815	0	no change	up	no: ATACseq no change, RNAseq up
CR_04840C_A	peak_6680	Promoter (<=1kb)	MSS11	3647296	0.240942	0.675838	-0.679	0.039	no change	down	no: ATACseq no change, RNAseq down
C3_00270C_A	peak_2843	Promoter (<=1kb)	NA	3640527	0.240633	0.415341	-0.075	0.854	no change	no change	same: no change
C1_07900W_A	peak_878	Promoter (<=1kb)	COI1	3640721	0.240019	0.347167	-0.226	0.564	no change	no change	same: no change
CR_00600C_A	peak_6252	Promoter (<=1kb)	NA	3639660	0.239395	0.695644	1.372	0	no change	up	no: ATACseq no change, RNAseq up
CR_10110W_A	peak_7434	Promoter (1-2kb)	CHT3	3638967	0.23914	0.297164	-2.684	0	no change	down	no: ATACseq no change, RNAseq down
C2_06680W_A	peak_2361	Distal Intergenic	FRP3	3648102	-1.12975	0.0077328	-1.885	0	down	down	same: down
CR_03770C_A	peak_6581	Promoter (<=1kb)	RPS30	30515390	0.238767	0.197687	-1.409	0	no change	down	no: ATACseq no change, RNAseq down
CR_10180W_A	peak_7446	Promoter (<=1kb)	NA	3638917	0.23863	0.368418	1.638	0	no change	up	no: ATACseq no change, RNAseq up
C1_03520W_A	peak_421	Promoter (<=1kb)	RPN3	3636917	0.238599	0.230088	2.469	0	no change	up	no: ATACseq no change, RNAseq up
C1_01420C_A	peak_181	Promoter (<=1kb)	CRL1	3640238	0.238075	0.572269	-0.047	0.874	no change	no change	same: no change
C1_14000C_A	peak_1558	Promoter (<=1kb)	DOA4	3643337	0.23805	0.277845	3.283	0	no change	up	no: ATACseq no change, RNAseq up
C2_06690C_A	peak_2367	Downstream (<1kb)	PEX22	3648103	-0.0639909	0.770867	0.448	0.162	no change	no change	same: no change
CR_10160W_A	peak_7444	Promoter (<=1kb)	FAA4	3638973	0.237362	0.206982	-0.1	0.716	no change	no change	same: no change
C1_01510W_A	peak_193	Promoter (<=1kb)	NA	3640229	0.237152	0.194951	-1.429	0.026	no change	down	no: ATACseq no change, RNAseq down
C4_00240C_A	peak_3777	Promoter (<=1kb)	PRO3	3645036	0.237097	0.308527	0.521	0.019	no change	up	no: ATACseq no change, RNAseq up
C2_06430C_A	peak_2327	Promoter (<=1kb)	NA	3646558	0.236984	0.286936	1.755	0	no change	up	no: ATACseq no change, RNAseq up
CR_06800C_A	peak_6894	Promoter (<=1kb)	HHF22	3647327	0.236936	0.21317	-4.164	0	no change	down	no: ATACseq no change, RNAseq down
C1_04290C_A	peak_500	Promoter (1-2kb)	ACS2	3644710	0.236785	0.427826	-0.696	0.008	no change	down	no: ATACseq no change, RNAseq down
C1_11680C_A	peak_1293	Promoter (<=1kb)	NA	30515056	0.236459	0.21185	0.369	0.232	no change	no change	same: no change
C1_00420W_A	peak_63	Promoter (<=1kb)	NA	3639286	0.236452	0.31863	1.598	0	no change	up	no: ATACseq no change, RNAseq up
C1_01710W_A	peak_218	Promoter (1-2kb)	NA	3640201	0.23631	0.269866	-0.678	0.009	no change	down	no: ATACseq no change, RNAseq down
C2_06720W_A	peak_2376	Downstream (2-3kb)	GRE2	3648026	1.20866	0.000731579	5.967	0	up	up	same: up
C6_00710W_A	peak_5178	Promoter (<=1kb)	NA	3647073	0.236212	0.203668	1.182	0	no change	up	no: ATACseq no change, RNAseq up
C6_04110W_A	peak_5545	Promoter (<=1kb)	NA	3647834	0.235839	0.246145	0.11	0.683	no change	no change	same: no change
C1_03130C_A	peak_374	Promoter (<=1kb)	GGA2	3636928	0.235596	0.213102	0.934	0	no change	up	no: ATACseq no change, RNAseq up
C3_02680C_A	peak_3094	Promoter (<=1kb)	SLD1	3638406	0.235579	0.336569	-0.279	0.274	no change	no change	same: no change
C2_04510W_A	peak_2136	Promoter (<=1kb)	RIM2	3645448	0.23556	0.364706	-2.833	0	no change	down	no: ATACseq no change, RNAseq down
CR_07020W_A	peak_6917	Promoter (<=1kb)	NA	3645731	0.235436	0.400601	-0.862	0.007	no change	down	no: ATACseq no change, RNAseq down
C6_02740W_A	peak_5398	Promoter (<=1kb)	NA	3639216	0.235386	0.674295	-0.074	0.799	no change	no change	same: no change
C7_01510W_A	peak_5857	Promoter (<=1kb)	NA	3637049	0.235305	0.28555	-1.758	0	no change	down	no: ATACseq no change, RNAseq down
C2_05030C_A	peak_2186	Promoter (<=1kb)	RHO3	3643448	0.234842	0.301824	-0.999	0	no change	down	no: ATACseq no change, RNAseq down
CR_02640W_A	peak_6458	Promoter (1-2kb)	RFG1	3642570	0.234691	0.270784	-0.997	0.001	no change	down	no: ATACseq no change, RNAseq down
C2_06810C_A	peak_2386	Downstream (<1kb)	RPL11	3643489	-0.790428	0.181625	-2.543	0	no change	down	no: ATACseq no change, RNAseq down
C3_07290W_A	peak_3646	Promoter (<=1kb)	NA	3638430	0.234255	0.235537	-1.304	0	no change	down	no: ATACseq no change, RNAseq down
C3_07730W_A	peak_3717	Promoter (<=1kb)	WOR4	3638454	0.23388	0.383534	-0.726	0.027	no change	down	no: ATACseq no change, RNAseq down
CR_08440W_A	peak_7127	Promoter (<=1kb)	NA	3642132	0.233626	0.325894	-0.688	0.044	no change	down	no: ATACseq no change, RNAseq down
C3_02220W_A	peak_3055	Promoter (<=1kb)	CAP1	3636640	0.233451	0.401354	2.791	0	no change	up	no: ATACseq no change, RNAseq up
C1_08740C_A	peak_969	Promoter (<=1kb)	SEC24	3634939	0.232991	0.481715	-0.287	0.262	no change	no change	same: no change
C2_06850W_A	peak_2391	Distal Intergenic	NA	30515142	-0.53636	0.0102935	-3.331	0	down	down	same: down
C1_14500C_A	peak_1641	Promoter (<=1kb)	NA	3643331	0.232546	0.207171	0.993	0.002	no change	up	no: ATACseq no change, RNAseq up
C1_03980W_A	peak_472	Promoter (<=1kb)	SPC19	3646423	0.231911	0.605591	1.706	0	no change	up	no: ATACseq no change, RNAseq up
C5_02230W_A	peak_4748	Promoter (<=1kb)	NA	3637708	0.231629	0.51279	2.128	0	no change	up	no: ATACseq no change, RNAseq up
C3_04530C_A	peak_3278	Promoter (<=1kb)	TEC1	3635261	0.231537	0.174044	-0.675	0.002	no change	down	no: ATACseq no change, RNAseq down
C1_09210C_A	peak_1025	Promoter (<=1kb)	NA	3634897	0.231274	0.238582	1.837	0	no change	up	no: ATACseq no change, RNAseq up
C2_03220C_A	peak_1998	Promoter (1-2kb)	STP4	3637405	0.231235	0.154972	0.983	0	no change	up	no: ATACseq no change, RNAseq up
C2_10470C_A	peak_2747	Promoter (<=1kb)	NA	3641196	0.231092	0.213102	0.885	0	no change	up	no: ATACseq no change, RNAseq up
C2_01090C_A	peak_1771	Promoter (<=1kb)	ERG28	3638833	0.230535	0.285743	-0.385	0.287	no change	no change	same: no change
C3_02290W_A	peak_3064	Promoter (<=1kb)	NA	3636556	0.230407	0.237177	0.399	0.23	no change	no change	same: no change
C1_00730C_A	peak_94	Promoter (<=1kb)	CMP1	3639328	0.230241	0.395193	0.336	0.187	no change	no change	same: no change
C3_02430W_A	peak_3076	Promoter (<=1kb)	APL2	3638343	0.230194	0.420593	0.735	0.01	no change	up	no: ATACseq no change, RNAseq up
C6_00170C_A	peak_5110	Promoter (<=1kb)	NA	3647903	0.230084	0.349697	0.578	0.18	no change	no change	same: no change
C1_08460C_A	peak_949	Promoter (<=1kb)	UPC2	3646489	0.230072	0.237813	0.886	0	no change	up	no: ATACseq no change, RNAseq up
C1_05000W_A	peak_572	Promoter (<=1kb)	RHD1	3647531	0.229763	0.262191	-1.817	0	no change	down	no: ATACseq no change, RNAseq down
CR_01750C_A	peak_6355	Promoter (<=1kb)	SEC4	3640119	0.229659	0.280916	-0.14	0.619	no change	no change	same: no change
C2_09940W_A	peak_2687	Promoter (<=1kb)	GCN4	3643823	0.229151	0.329443	1.283	0	no change	up	no: ATACseq no change, RNAseq up
C7_00710W_A	peak_5772	Promoter (<=1kb)	RPS28B	30515349	0.229003	0.335693	-1.661	0	no change	down	no: ATACseq no change, RNAseq down
CR_05180C_A	peak_6710	Promoter (<=1kb)	SDH2	3646397	0.228353	0.349698	-0.655	0.018	no change	down	no: ATACseq no change, RNAseq down
C2_06240W_A	peak_2310	Promoter (<=1kb)	SMD2	30515133	0.228168	0.511217	-1.243	0	no change	down	no: ATACseq no change, RNAseq down
C1_04990C_A	peak_571	Promoter (<=1kb)	NA	3647530	0.228057	0.182693	-1.053	0.107	no change	no change	same: no change
C1_11760C_A	peak_1305	Promoter (<=1kb)	NA	3645328	0.227931	0.460179	0.241	0.294	no change	no change	same: no change
C7_02060W_A	peak_5942	Promoter (<=1kb)	LIG1	3636947	0.227787	0.397339	0.248	0.321	no change	no change	same: no change
C1_08320W_A	peak_923	Promoter (<=1kb)	TKL1	3640767	0.22769	0.504499	1.37	0	no change	up	no: ATACseq no change, RNAseq up
C2_08500W_A	peak_2531	Promoter (<=1kb)	RSP5	3643898	0.227299	0.301911	1	0	no change	up	no: ATACseq no change, RNAseq up
C2_09040W_A	peak_2588	Promoter (<=1kb)	NA	3645792	0.2269	0.459091	1.161	0	no change	up	no: ATACseq no change, RNAseq up
C4_06850C_A	peak_4456	Promoter (<=1kb)	NA	3642912	0.22599	0.296786	-1.648	0	no change	down	no: ATACseq no change, RNAseq down
C7_00360W_A	peak_5733	Promoter (<=1kb)	DFI1	3638038	0.225118	0.34233	-2.595	0	no change	down	no: ATACseq no change, RNAseq down
C1_00420W_A	peak_64	Promoter (<=1kb)	NA	3639286	0.225031	0.469361	1.598	0	no change	up	no: ATACseq no change, RNAseq up
C2_08120W_A	peak_2500	Promoter (<=1kb)	MAF1	3642332	0.224267	0.187524	1.328	0	no change	up	no: ATACseq no change, RNAseq up
C7_01970C_A	peak_5917	Promoter (1-2kb)	TOM40	3636968	0.224179	0.443	-0.957	0.001	no change	down	no: ATACseq no change, RNAseq down
C6_03370W_A	peak_5451	Promoter (<=1kb)	NA	3639230	0.224167	0.184489	0.952	0.003	no change	up	no: ATACseq no change, RNAseq up
C7_01940C_A	peak_5912	Promoter (<=1kb)	NA	3636971	0.223686	0.171143	1.227	0	no change	up	no: ATACseq no change, RNAseq up
C4_07240W_A	peak_4496	Promoter (<=1kb)	NA	3642945	0.223436	0.447669	0.014	0.967	no change	no change	same: no change
C3_06190C_A	peak_3501	Promoter (1-2kb)	ALS6	3642266	0.223002	0.602959	1.868	0	no change	up	no: ATACseq no change, RNAseq up
C1_13940W_A	peak_1548	Promoter (1-2kb)	SIM1	3636185	0.222736	0.212755	-2.06	0	no change	down	no: ATACseq no change, RNAseq down
C6_03930W_A	peak_5525	Promoter (<=1kb)	OPT8	3640266	0.222556	0.215161	3.511	0	no change	up	no: ATACseq no change, RNAseq up
C3_03640W_A	peak_3176	Promoter (<=1kb)	DAL9	3645653	0.222414	0.507177	1.616	0	no change	up	no: ATACseq no change, RNAseq up
C1_11320C_A	peak_1256	Promoter (<=1kb)	NA	30515052	0.22221	0.177298	-0.846	0.303	no change	no change	same: no change
CR_05490W_A	peak_6745	Promoter (<=1kb)	SUA72	3648239	0.222019	0.278185	1.336	0	no change	up	no: ATACseq no change, RNAseq up
C2_02370C_A	peak_1906	Promoter (<=1kb)	HOM2	3635826	0.221881	0.42964	0.895	0.023	no change	up	no: ATACseq no change, RNAseq up
C1_10640C_A	peak_1186	Promoter (<=1kb)	PEA2	3647673	0.221686	0.48931	-1.439	0	no change	down	no: ATACseq no change, RNAseq down
C1_09720W_A	peak_1080	Promoter (<=1kb)	URA1	3634819	0.22158	0.27855	-0.719	0.017	no change	down	no: ATACseq no change, RNAseq down
C7_00400W_A	peak_5737	Promoter (<=1kb)	LEU2	3638034	0.221312	0.37691	-0.535	0.013	no change	down	no: ATACseq no change, RNAseq down
C2_06930C_A	peak_2400	Promoter (<=1kb)	NA	3643525	0.220781	0.408433	-1.845	0	no change	down	no: ATACseq no change, RNAseq down
C3_04880W_A	peak_3322	Promoter (<=1kb)	PIN3	3635228	0.22027	0.323921	1.012	0	no change	up	no: ATACseq no change, RNAseq up
C3_07820W_A	peak_3734	Promoter (<=1kb)	NA	3647463	0.220014	0.3924	-0.688	0.018	no change	down	no: ATACseq no change, RNAseq down
CR_05440W_A	peak_6739	Promoter (<=1kb)	NA	3648245	0.219828	0.419708	1.674	0	no change	up	no: ATACseq no change, RNAseq up
C2_00390C_A	peak_1702	Promoter (<=1kb)	NA	3638822	0.219638	0.354085	2.036	0	no change	up	no: ATACseq no change, RNAseq up
C1_13330C_A	peak_1464	Promoter (<=1kb)	NA	3636150	0.219409	0.412253	-2.012	0	no change	down	no: ATACseq no change, RNAseq down
C3_06190C_A	peak_3500	Promoter (1-2kb)	ALS6	3642266	0.219212	0.379922	1.868	0	no change	up	no: ATACseq no change, RNAseq up
C1_14160W_A	peak_1582	Promoter (<=1kb)	NA	3643322	0.218935	0.304566	-2.589	0	no change	down	no: ATACseq no change, RNAseq down
C4_00260W_A	peak_3778	Promoter (<=1kb)	NA	3645037	0.218935	0.525451	-0.25	0.253	no change	no change	same: no change
C4_01690C_A	peak_3928	Promoter (<=1kb)	HRT2	3635709	0.218758	0.33333	1.674	0	no change	up	no: ATACseq no change, RNAseq up
C2_02340C_A	peak_1905	Promoter (<=1kb)	ENT3	3635813	0.218343	0.750232	-0.009	0.978	no change	no change	same: no change
C1_06200W_A	peak_683	Promoter (<=1kb)	NA	3648300	0.218205	0.55728	0.776	0	no change	up	no: ATACseq no change, RNAseq up
C1_09060C_A	peak_998	Promoter (<=1kb)	NA	3634772	0.218122	0.441822	1.512	0	no change	up	no: ATACseq no change, RNAseq up
C1_13210C_A	peak_1449	Promoter (<=1kb)	NA	NA	0.218003	0.679715	0.181	0.767	no change	no change	same: no change
C1_00400W_A	peak_61	Promoter (<=1kb)	SVF1	3639289	0.21721	0.243279	-0.287	0.241	no change	no change	same: no change
CR_07100W_A	peak_6936	Promoter (<=1kb)	FLC2	3647962	0.216773	0.547575	-0.681	0.004	no change	down	no: ATACseq no change, RNAseq down
C7_00040C_A	peak_5688	Promoter (<=1kb)	NA	3638002	0.216387	0.563228	-1.943	0	no change	down	no: ATACseq no change, RNAseq down
CR_02940C_A	peak_6511	Promoter (<=1kb)	NA	3642589	0.216268	0.489531	-1.047	0	no change	down	no: ATACseq no change, RNAseq down
CR_07060C_A	peak_6923	Promoter (<=1kb)	CRZ2	3645725	0.216136	0.313761	-0.626	0.137	no change	no change	same: no change
C1_02770W_A	peak_336	Promoter (<=1kb)	NA	30514973	0.215543	0.377511	-0.927	0.001	no change	down	no: ATACseq no change, RNAseq down
CR_10490W_A	peak_7486	Promoter (<=1kb)	EIF4E	3638981	0.215331	0.234759	-1.215	0	no change	down	no: ATACseq no change, RNAseq down
C3_04070C_A	peak_3234	Promoter (<=1kb)	CDR11	3647389	0.215182	0.225102	1.49	0	no change	up	no: ATACseq no change, RNAseq up
C1_03310W_A	peak_394	Promoter (<=1kb)	NA	3636856	0.215068	0.346594	0.328	0.146	no change	no change	same: no change
C6_03820C_A	peak_5509	Promoter (<=1kb)	NA	3640288	0.214764	0.224746	1.292	0	no change	up	no: ATACseq no change, RNAseq up
C2_05500W_A	peak_2231	Promoter (<=1kb)	ATP4	3643418	0.214635	0.400771	-0.147	0.624	no change	no change	same: no change
C4_03400W_A	peak_4097	Promoter (<=1kb)	NA	30515256	0.214239	0.399013	-0.727	0.017	no change	down	no: ATACseq no change, RNAseq down
C3_03180C_A	peak_3133	Promoter (<=1kb)	PNP1	3638426	0.214234	0.419702	1.62	0	no change	up	no: ATACseq no change, RNAseq up
C1_05860W_A	peak_651	Promoter (<=1kb)	PRN2	3639879	0.213871	0.495674	2.669	0	no change	up	no: ATACseq no change, RNAseq up
C2_08820C_A	peak_2557	Promoter (<=1kb)	SPO11	3643873	0.213765	0.260781	1.604	0	no change	up	no: ATACseq no change, RNAseq up
C2_07720C_A	peak_2458	Exon (C2_07720C_A/C2_07720C_A, exon 1 of 1)	NA	3642304	-0.132572	0.648818	1.093	0	no change	up	no: ATACseq no change, RNAseq up
C2_04970W_A	peak_2182	Promoter (<=1kb)	ABP2	3643443	0.213683	0.277349	-0.901	0.003	no change	down	no: ATACseq no change, RNAseq down
C1_01930W_A	peak_246	Intron (C1_01930W_A/C1_01930W_A, intron 1 of 1)	NA	30514966	-0.211601	0.603555	1.237	0	no change	up	no: ATACseq no change, RNAseq up
C6_00790C_A	peak_5184	Promoter (<=1kb)	CTR1	3647077	0.213604	0.273627	-1.795	0	no change	down	no: ATACseq no change, RNAseq down
CR_10360C_A	peak_7476	Promoter (<=1kb)	CTM1	3638951	0.213586	0.275444	1.235	0	no change	up	no: ATACseq no change, RNAseq up
CR_02860W_A	peak_6500	Promoter (<=1kb)	RHO1	3642564	0.21349	0.567477	-0.793	0.001	no change	down	no: ATACseq no change, RNAseq down
CR_05070W_A	peak_6701	Promoter (<=1kb)	tH(GUG)1	30515401	0.213458	0.38771	-0.564	0.503	no change	no change	same: no change
C2_08320C_A	peak_2521	Promoter (<=1kb)	NA	3648167	0.213269	0.563614	-2.999	0	no change	down	no: ATACseq no change, RNAseq down
C2_07750W_A	peak_2465	Exon (C2_07750W_A/C2_07750W_A, exon 1 of 1)	RHO2	30515143	-0.0683736	0.890511	0.897	0.009	no change	up	no: ATACseq no change, RNAseq up
C4_06770W_A	peak_4443	Promoter (<=1kb)	NA	3642920	0.21252	0.271585	1.261	0	no change	up	no: ATACseq no change, RNAseq up
C5_00200C_A	peak_4524	Promoter (<=1kb)	BDF1	3641592	0.212395	0.480945	0.149	0.629	no change	no change	same: no change
C2_07760W_A	peak_2468	5' UTR	NA	3642298	-0.23357	0.548205	1.182	0	no change	up	no: ATACseq no change, RNAseq up
C1_04560W_A	peak_531	Promoter (<=1kb)	NA	3646130	0.212384	0.419367	2.054	0	no change	up	no: ATACseq no change, RNAseq up
C2_05440W_A	peak_2223	Promoter (<=1kb)	PEX6	3643436	0.2123	0.369476	-0.297	0.234	no change	no change	same: no change
C6_01740C_A	peak_5300	Promoter (<=1kb)	ATG15	3641641	0.21215	0.352679	1.983	0	no change	up	no: ATACseq no change, RNAseq up
C5_00480C_A	peak_4573	Promoter (1-2kb)	SEC14	3641542	0.212134	0.348796	-1.108	0	no change	down	no: ATACseq no change, RNAseq down
CR_00350W_A	peak_6227	Promoter (<=1kb)	NA	3639686	0.211985	0.239601	-1.83	0	no change	down	no: ATACseq no change, RNAseq down
C3_00520W_A	peak_2865	Promoter (<=1kb)	NA	3640513	0.211725	0.468202	1.096	0	no change	up	no: ATACseq no change, RNAseq up
C2_07890W_A	peak_2475	Distal Intergenic	PRS5	3642296	0.0531446	0.868082	-2.577	0	no change	down	no: ATACseq no change, RNAseq down
C2_02910W_A	peak_1950	Promoter (<=1kb)	NA	30515097	0.21158	0.391058	0.173	0.771	no change	no change	same: no change
C1_10200C_A	peak_1129	Promoter (<=1kb)	NA	3634877	0.211046	0.400183	-2.3	0	no change	down	no: ATACseq no change, RNAseq down
CR_02190C_A	peak_6402	Promoter (<=1kb)	SEF1	3644945	0.210822	0.490317	-0.05	0.905	no change	no change	same: no change
C2_07910C_A	peak_2479	Exon (C2_07900W_A/C2_07900W_A, exon 1 of 1)	NA	30515146	0.781794	0.0435817	-1.143	0	up	down	no: ATACseq up, RNAseq down
C5_02940C_A	peak_4817	Promoter (<=1kb)	MIG1	3637812	0.21056	0.182338	-1.48	0	no change	down	no: ATACseq no change, RNAseq down
C2_07910C_A	peak_2480	Exon (C2_07900W_A/C2_07900W_A, exon 1 of 1)	NA	30515146	0.875181	0.0704892	-1.143	0	no change	down	no: ATACseq no change, RNAseq down
C2_07910C_A	peak_2481	Exon (C2_07900W_A/C2_07900W_A, exon 1 of 1)	NA	30515146	1.19969	0.0208878	-1.143	0	up	down	no: ATACseq up, RNAseq down
C1_08050W_A	peak_900	Promoter (<=1kb)	NA	3640709	0.210478	0.58383	-1.329	0	no change	down	no: ATACseq no change, RNAseq down
C2_07930C_A	peak_2483	Exon (C2_07930C_A/C2_07930C_A, exon 1 of 1)	VRP1	3642293	-0.281383	0.297289	1.571	0.008	no change	up	no: ATACseq no change, RNAseq up
C2_05680W_A	peak_2266	Promoter (<=1kb)	COG4	3645571	0.210433	0.345152	-0.216	0.377	no change	no change	same: no change
C4_06040W_A	peak_4374	Promoter (<=1kb)	NA	3646521	0.210091	0.648818	0.888	0.016	no change	up	no: ATACseq no change, RNAseq up
C5_01250W_A	peak_4669	Promoter (<=1kb)	GPR1	3642616	0.209952	0.188909	-0.26	0.297	no change	no change	same: no change
C2_07980W_A	peak_2487	Exon (C2_07980W_A/C2_07980W_A, exon 1 of 1)	NA	3642312	-0.67427	0.0230816	0.28	0.275	down	no change	no: ATACseq down, RNAseq no change
C1_04100C_A	peak_481	Promoter (<=1kb)	POR1	3644698	0.209776	0.426743	-0.342	0.189	no change	no change	same: no change
CR_05360C_A	peak_6732	Promoter (<=1kb)	NA	3648033	0.20977	0.535165	0.161	0.661	no change	no change	same: no change
CR_00020W_A	peak_6165	Promoter (<=1kb)	TLO1	3639677	0.20961	0.230088	1.572	0.006	no change	up	no: ATACseq no change, RNAseq up
C4_00690C_A	peak_3820	Promoter (<=1kb)	NA	3645752	0.209281	0.472082	-1.94	0	no change	down	no: ATACseq no change, RNAseq down
C3_07170C_A	peak_3628	Promoter (<=1kb)	NA	3638536	0.208991	0.250113	-0.157	0.53	no change	no change	same: no change
C7_00170W_A	peak_5707	Promoter (<=1kb)	VPS70	3637971	0.208985	0.620116	0.222	0.412	no change	no change	same: no change
C2_08080C_A	peak_2497	5' UTR	IFM3	3642335	-0.161388	0.690949	-0.756	0.01	no change	down	no: ATACseq no change, RNAseq down
C6_02570C_A	peak_5381	Promoter (<=1kb)	SEC20	3639206	0.20855	0.461708	1.094	0	no change	up	no: ATACseq no change, RNAseq up
C1_11590W_A	peak_1286	Promoter (<=1kb)	PLD1	3645329	0.208488	0.294518	0.227	0.427	no change	no change	same: no change
C7_04090C_A	peak_6110	Promoter (<=1kb)	NA	3643135	0.20835	0.301641	0.349	0.194	no change	no change	same: no change
C5_04470C_A	peak_4976	Promoter (<=1kb)	NA	3636414	0.208169	0.321155	3.826	0	no change	up	no: ATACseq no change, RNAseq up
C1_01090C_A	peak_145	Promoter (<=1kb)	NA	3640174	0.20815	0.527171	-0.622	0.232	no change	no change	same: no change
C1_03120W_A	peak_373	Promoter (<=1kb)	NA	3636926	0.208141	0.28555	0.564	0.006	no change	up	no: ATACseq no change, RNAseq up
C1_10060C_A	peak_1110	Promoter (<=1kb)	NA	3634812	0.208134	0.52516	2.659	0	no change	up	no: ATACseq no change, RNAseq up
C2_08170W_A	peak_2504	5' UTR	NA	3642318	0.178018	0.741299	-0.213	0.671	no change	no change	same: no change
C6_00360C_A	peak_5144	Promoter (<=1kb)	NA	3646083	0.207871	0.599718	0.889	0	no change	up	no: ATACseq no change, RNAseq up
C1_02850W_A	peak_348	Promoter (<=1kb)	NA	3636862	0.207858	0.259282	-0.467	0.062	no change	no change	same: no change
C2_08210C_A	peak_2507	Exon (C2_08200W_A/C2_08200W_A, exon 1 of 1)	MFA1	30515153	0.848103	0.0952091	5.551	0	no change	up	no: ATACseq no change, RNAseq up
C2_08210C_A	peak_2508	Exon (C2_08210C_A/C2_08210C_A, exon 1 of 1)	MFA1	30515153	1.46037	0.000300564	5.551	0	up	up	same: up
C2_04940C_A	peak_2176	Promoter (<=1kb)	ITR1	3643440	0.207621	0.512713	2.194	0	no change	up	no: ATACseq no change, RNAseq up
CR_05460W_A	peak_6740	Promoter (<=1kb)	NA	3648237	0.206968	0.328342	0.924	0	no change	up	no: ATACseq no change, RNAseq up
C5_01560C_A	peak_4690	Promoter (<=1kb)	NA	3647064	0.206956	0.415904	-2.098	0	no change	down	no: ATACseq no change, RNAseq down
C2_08240W_A	peak_2511	Exon (C2_08240W_A/C2_08240W_A, exon 1 of 1)	ORF298	3642344	-0.148588	0.557922	1.001	0	no change	up	no: ATACseq no change, RNAseq up
C4_05430C_A	peak_4309	Promoter (<=1kb)	GAP5	3646954	0.206234	0.257104	-0.838	0	no change	down	no: ATACseq no change, RNAseq down
C3_07420W_A	peak_3662	Promoter (<=1kb)	NA	3638485	0.205761	0.325459	-1.5	0	no change	down	no: ATACseq no change, RNAseq down
C2_08280W_A	peak_2514	Downstream (1-2kb)	EAF3	3648318	0.332203	0.563932	0.056	0.864	no change	no change	same: no change
C2_08290C_A	peak_2515	Downstream (<1kb)	UCF1	3648170	0.451419	0.183639	5.932	0	no change	up	no: ATACseq no change, RNAseq up
C2_08290C_A	peak_2516	Downstream (<1kb)	UCF1	3648170	1.28013	0.0134528	5.932	0	up	up	same: up
CR_07630C_A	peak_6987	Promoter (<=1kb)	RPS27	30515429	0.205262	0.400428	-2.526	0	no change	down	no: ATACseq no change, RNAseq down
C4_06810C_A	peak_4448	Promoter (<=1kb)	NA	3642916	0.205111	0.373986	0.374	0.134	no change	no change	same: no change
C2_08320C_A	peak_2519	Exon (C2_08310W_A/C2_08310W_A, exon 1 of 1)	NA	3648167	0.312251	0.516747	-2.999	0	no change	down	no: ATACseq no change, RNAseq down
C4_02740W_A	peak_4042	Promoter (<=1kb)	NA	3637855	0.204985	0.213054	-0.376	0.214	no change	no change	same: no change
C1_01710W_A	peak_219	Promoter (<=1kb)	NA	3640201	0.204898	0.213797	-0.678	0.009	no change	down	no: ATACseq no change, RNAseq down
C5_02860C_A	peak_4811	Promoter (<=1kb)	GRP2	3637744	0.204694	0.267154	3.525	0	no change	up	no: ATACseq no change, RNAseq up
C7_01230C_A	peak_5831	Promoter (<=1kb)	NA	3645906	0.204588	0.294109	1.954	0	no change	up	no: ATACseq no change, RNAseq up
C1_07880C_A	peak_872	Promoter (<=1kb)	GCS1	3640742	0.204415	0.601247	2.271	0	no change	up	no: ATACseq no change, RNAseq up
C7_02530C_A	peak_5977	Promoter (<=1kb)	NA	3636940	0.203823	0.555736	0.569	0.024	no change	up	no: ATACseq no change, RNAseq up
C4_03540C_A	peak_4124	Promoter (<=1kb)	ECM38	3645375	0.203807	0.655714	0.414	0.11	no change	no change	same: no change
C7_01040C_A	peak_5817	Promoter (<=1kb)	NA	3638018	0.203738	0.489379	2.548	0	no change	up	no: ATACseq no change, RNAseq up
C7_04360C_A	peak_6161	Promoter (1-2kb)	TLO16	3643137	0.203645	0.357921	0.728	0.032	no change	up	no: ATACseq no change, RNAseq up
C1_10760W_A	peak_1199	Promoter (<=1kb)	VPS23	3644401	0.203549	0.547013	0.226	0.489	no change	no change	same: no change
C1_08010W_A	peak_896	Promoter (<=1kb)	DPM1	3640700	0.203543	0.411094	-0.239	0.369	no change	no change	same: no change
C1_14280C_A	peak_1598	Promoter (<=1kb)	NPL3	3643310	0.203498	0.47957	-0.824	0.005	no change	down	no: ATACseq no change, RNAseq down
CR_09190C_A	peak_7320	Promoter (<=1kb)	NA	3641885	0.203474	0.59328	0.092	0.722	no change	no change	same: no change
C3_00980W_A	peak_2934	Promoter (<=1kb)	FLC1	3639854	0.203336	0.291018	-1.385	0	no change	down	no: ATACseq no change, RNAseq down
C3_01160W_A	peak_2953	Promoter (<=1kb)	MSS4	3647957	0.202933	0.37086	-0.164	0.538	no change	no change	same: no change
C6_00830C_A	peak_5202	Promoter (1-2kb)	CAN3	3647066	0.202907	0.27305	-2.463	0	no change	down	no: ATACseq no change, RNAseq down
C2_08580W_A	peak_2536	Distal Intergenic	NA	3643916	-0.781136	0.0688575	1.429	0.003	no change	up	no: ATACseq no change, RNAseq up
C2_08580W_A	peak_2537	Distal Intergenic	NA	3643916	-0.242058	0.181625	1.429	0.003	no change	up	no: ATACseq no change, RNAseq up
C2_08590W_A	peak_2538	Distal Intergenic	YWP1	3643915	-0.145636	0.457771	-2.63	0	no change	down	no: ATACseq no change, RNAseq down
C5_01280C_A	peak_4673	Promoter (<=1kb)	NUF2	3642613	0.202795	0.716866	0.598	0.016	no change	up	no: ATACseq no change, RNAseq up
C7_03270W_A	peak_6033	Promoter (<=1kb)	NA	3641365	0.202627	0.565349	-2.187	0	no change	down	no: ATACseq no change, RNAseq down
C2_10690W_A	peak_2782	Promoter (<=1kb)	TPS3	3641205	0.202594	0.674036	0.981	0	no change	up	no: ATACseq no change, RNAseq up
C2_03280W_A	peak_2010	Promoter (<=1kb)	NSP1	3637430	0.202583	0.333976	-0.096	0.722	no change	no change	same: no change
C6_04280W_A	peak_5570	Promoter (<=1kb)	NA	3646279	0.202484	0.340452	0.38	0.108	no change	no change	same: no change
C2_01130W_A	peak_1774	Promoter (<=1kb)	NOT3	3638829	0.202157	0.597091	-1.011	0	no change	down	no: ATACseq no change, RNAseq down
C2_08630C_A	peak_2544	Downstream (<1kb)	NA	3643910	0.42364	0.304791	-0.354	0.141	no change	no change	same: no change
C3_01730C_A	peak_3011	Promoter (<=1kb)	UTR2	3636591	0.201677	0.331072	-0.29	0.233	no change	no change	same: no change
C5_03570W_A	peak_4891	Promoter (<=1kb)	NA	3646976	0.201674	0.336154	0.06	0.809	no change	no change	same: no change
C5_01840C_A	peak_4713	Promoter (<=1kb)	TAC1	3643755	0.20143	0.524664	0.89	0	no change	up	no: ATACseq no change, RNAseq up
C3_01560W_A	peak_2996	Promoter (1-2kb)	NA	3636669	0.201275	0.218549	-3.066	0	no change	down	no: ATACseq no change, RNAseq down
C1_11330C_A	peak_1258	Promoter (<=1kb)	SMT3	3644550	0.201245	0.347736	0.862	0.01	no change	up	no: ATACseq no change, RNAseq up
C3_06320W_A	peak_3517	Promoter (<=1kb)	ALS7	3642234	0.201112	0.298697	1.625	0	no change	up	no: ATACseq no change, RNAseq up
CR_09790W_A	peak_7395	Promoter (<=1kb)	ALO1	3638983	0.200672	0.531708	-0.175	0.509	no change	no change	same: no change
C2_07880W_A	peak_2473	Promoter (<=1kb)	APM4	3642297	0.200589	0.450759	0.934	0	no change	up	no: ATACseq no change, RNAseq up
C4_03360C_A	peak_4092	Promoter (<=1kb)	VTC4	3646795	0.200472	0.415576	-2.659	0	no change	down	no: ATACseq no change, RNAseq down
C1_11960C_A	peak_1331	Promoter (<=1kb)	NA	30515060	0.20045	0.452528	-0.047	0.909	no change	no change	same: no change
C1_01770W_A	peak_230	Promoter (<=1kb)	MAK32	3645411	0.200324	0.486461	0.676	0.01	no change	up	no: ATACseq no change, RNAseq up
C7_03410C_A	peak_6054	Promoter (1-2kb)	NA	3646716	0.200165	0.479683	-3.363	0	no change	down	no: ATACseq no change, RNAseq down
C2_08820C_A	peak_2556	Exon (C2_08820C_A/C2_08820C_A, exon 1 of 1)	SPO11	3643873	0.263549	0.305164	1.604	0	no change	up	no: ATACseq no change, RNAseq up
C6_03360C_A	peak_5448	Promoter (1-2kb)	NA	3639203	0.199975	0.278185	0.086	1	no change	no change	same: no change
CR_07310W_A	peak_6955	Promoter (<=1kb)	NA	3646058	0.199772	0.591728	-2.582	0	no change	down	no: ATACseq no change, RNAseq down
C5_04780W_A	peak_5003	Promoter (<=1kb)	ASH2	3636445	0.199453	0.567296	-1.048	0	no change	down	no: ATACseq no change, RNAseq down
C7_02450W_A	peak_5971	Promoter (<=1kb)	NA	3636972	0.199403	0.6961	2.475	0	no change	up	no: ATACseq no change, RNAseq up
CR_05480W_A	peak_6743	Promoter (<=1kb)	NA	3648238	0.199217	0.421668	-0.213	0.354	no change	no change	same: no change
C4_01900C_A	peak_3949	Promoter (<=1kb)	MDH1-1	3635636	0.198981	0.296626	0.795	0.005	no change	up	no: ATACseq no change, RNAseq up
C2_08870C_A	peak_2562	Downstream (<1kb)	PIR1	3645801	0.198725	0.606304	-0.244	0.423	no change	no change	same: no change
C1_01630W_A	peak_207	Promoter (1-2kb)	NA	3640194	0.198813	0.583603	0.606	0.003	no change	up	no: ATACseq no change, RNAseq up
C3_00730W_A	peak_2898	Promoter (1-2kb)	NA	3640530	0.198806	0.395761	-0.554	0.022	no change	down	no: ATACseq no change, RNAseq down
CR_05630W_A	peak_6769	Promoter (<=1kb)	DBP8	3646692	0.198805	0.565349	-3.551	0	no change	down	no: ATACseq no change, RNAseq down
C1_12080W_A	peak_1348	Promoter (<=1kb)	LCB4	3642057	0.198574	0.393952	2.542	0	no change	up	no: ATACseq no change, RNAseq up
C1_04390C_A	peak_512	Promoter (<=1kb)	NOP4	3647991	0.198019	0.557763	-3.044	0	no change	down	no: ATACseq no change, RNAseq down
C4_05900C_A	peak_4355	Promoter (1-2kb)	NA	3641796	0.198005	0.745863	3.032	0	no change	up	no: ATACseq no change, RNAseq up
C2_10220C_A	peak_2719	Promoter (<=1kb)	PHO23	3643926	0.197934	0.586208	0.723	0	no change	up	no: ATACseq no change, RNAseq up
C1_09190C_A	peak_1022	Promoter (<=1kb)	DAK2	3634895	0.197838	0.37691	1.872	0	no change	up	no: ATACseq no change, RNAseq up
CR_00580W_A	peak_6251	Promoter (<=1kb)	YRB1	3639663	0.19759	0.467893	-1.132	0	no change	down	no: ATACseq no change, RNAseq down
C2_05610C_A	peak_2247	Promoter (<=1kb)	RPS8A	3645565	0.196845	0.275114	-1.902	0	no change	down	no: ATACseq no change, RNAseq down
CR_10270C_A	peak_7455	Promoter (<=1kb)	AHA1	3638933	0.196701	0.426484	1.882	0	no change	up	no: ATACseq no change, RNAseq up
C5_01290C_A	peak_4674	Promoter (<=1kb)	NA	3642647	0.196669	0.497378	-0.183	0.435	no change	no change	same: no change
C1_11690W_A	peak_1294	Promoter (<=1kb)	NA	3645322	0.196455	0.402851	0.84	0.005	no change	up	no: ATACseq no change, RNAseq up
C2_09000C_A	peak_2578	Downstream (<1kb)	NA	3645782	-0.288313	0.403556	-1.862	0	no change	down	no: ATACseq no change, RNAseq down
C5_01640W_A	peak_4697	Promoter (<=1kb)	MAS2	3647249	0.196131	0.684973	-0.369	0.111	no change	no change	same: no change
CR_09230C_A	peak_7324	Promoter (<=1kb)	NA	3641918	0.195757	0.413145	0.515	0.068	no change	no change	same: no change
C2_03770C_A	peak_2073	Promoter (<=1kb)	STE11	3637369	0.195709	0.629187	0.373	0.326	no change	no change	same: no change
C2_09200W_A	peak_2605	Promoter (<=1kb)	tP(UGG)2	30515157	0.195594	0.274623	-1.306	0.062	no change	no change	same: no change
C2_03620W_A	peak_2059	Promoter (<=1kb)	IFK2	3637439	0.195538	0.523718	3.211	0	no change	up	no: ATACseq no change, RNAseq up
C6_04350C_A	peak_5576	Promoter (<=1kb)	FLO8	3646292	0.195341	0.30727	-1.247	0	no change	down	no: ATACseq no change, RNAseq down
C5_00030W_A	peak_4501	Promoter (<=1kb)	NA	3647879	0.195317	0.405956	-1.16	0.009	no change	down	no: ATACseq no change, RNAseq down
C3_05210C_A	peak_3375	Promoter (<=1kb)	DYN1	3635236	0.19531	0.240853	-0.783	0.001	no change	down	no: ATACseq no change, RNAseq down
C1_03950C_A	peak_470	Promoter (<=1kb)	NA	3646417	0.194637	0.598579	0.062	0.868	no change	no change	same: no change
C2_09030W_A	peak_2587	Exon (C2_09030W_A/C2_09030W_A, exon 2 of 2)	NA	3645793	-0.484828	0.329891	2.342	0	no change	up	no: ATACseq no change, RNAseq up
C2_05260W_A	peak_2211	Promoter (<=1kb)	BUD14	3643469	0.194571	0.588425	-1.037	0	no change	down	no: ATACseq no change, RNAseq down
CR_00200W_A	peak_6202	Promoter (<=1kb)	PCK1	3639701	0.194558	0.392713	-1.979	0.001	no change	down	no: ATACseq no change, RNAseq down
C6_03110C_A	peak_5426	Promoter (<=1kb)	NA	3639278	0.193626	0.565349	0.16	0.589	no change	no change	same: no change
C1_05200C_A	peak_608	Promoter (<=1kb)	NA	3642466	0.193541	0.4462	1.342	0	no change	up	no: ATACseq no change, RNAseq up
C5_05410C_A	peak_5075	Promoter (<=1kb)	ILV3	3636428	0.193115	0.352566	-1.03	0	no change	down	no: ATACseq no change, RNAseq down
C2_01320W_A	peak_1797	Promoter (<=1kb)	NA	3638846	0.193054	0.621556	1.763	0	no change	up	no: ATACseq no change, RNAseq up
CR_02680W_A	peak_6476	Promoter (<=1kb)	NA	3642573	0.192533	0.47514	-1.314	0	no change	down	no: ATACseq no change, RNAseq down
C1_02980W_A	peak_357	Promoter (<=1kb)	GOR1	3636836	0.1921	0.320418	3.415	0	no change	up	no: ATACseq no change, RNAseq up
C2_09130C_A	peak_2595	Exon (C2_09130C_A/C2_09130C_A, exon 1 of 1)	IFF6	3644087	-0.274039	0.268594	2.294	0	no change	up	no: ATACseq no change, RNAseq up
C1_11270W_A	peak_1248	Promoter (<=1kb)	NA	3644555	0.191939	0.301885	3.507	0	no change	up	no: ATACseq no change, RNAseq up
C3_04520C_A	peak_3273	Promoter (<=1kb)	ADE2	3635259	0.191743	0.3924	-1.646	0	no change	down	no: ATACseq no change, RNAseq down
C2_10610W_A	peak_2771	Promoter (<=1kb)	GYP5	3641246	0.19172	0.457709	-0.835	0	no change	down	no: ATACseq no change, RNAseq down
C2_02080W_A	peak_1879	Promoter (<=1kb)	NA	30515093	0.19165	0.602756	-0.212	0.845	no change	no change	same: no change
C7_02290W_A	peak_5958	Promoter (<=1kb)	NA	3636938	0.191575	0.427646	-1.066	0.047	no change	down	no: ATACseq no change, RNAseq down
C1_02110C_A	peak_260	Downstream (<1kb)	HGT2	3644579	0.188594	0.637465	0.208	0.495	no change	no change	same: no change
C7_04330C_A	peak_6158	Promoter (<=1kb)	SYS1	3643138	0.191393	0.321527	1.367	0	no change	up	no: ATACseq no change, RNAseq up
C4_03200C_A	peak_4081	Promoter (<=1kb)	NA	3637837	0.191085	0.347167	1.875	0	no change	up	no: ATACseq no change, RNAseq up
C5_01110W_A	peak_4649	Promoter (<=1kb)	NA	3642623	0.190908	0.271585	-3.036	0	no change	down	no: ATACseq no change, RNAseq down
C7_00730W_A	peak_5775	Promoter (<=1kb)	MET28	3637962	0.190834	0.442915	0.818	0.002	no change	up	no: ATACseq no change, RNAseq up
C6_01950C_A	peak_5317	Promoter (<=1kb)	NA	3644558	0.190496	0.421726	-0.672	0.005	no change	down	no: ATACseq no change, RNAseq down
C1_13820C_A	peak_1518	Promoter (<=1kb)	NA	3636127	0.190178	0.551981	-4.024	0	no change	down	no: ATACseq no change, RNAseq down
C6_01570C_A	peak_5280	Promoter (1-2kb)	FGR47	3641651	0.189859	0.414038	-0.682	0.006	no change	down	no: ATACseq no change, RNAseq down
C2_09220W_A	peak_2608	Exon (C2_09220W_A/C2_09220W_A, exon 1 of 1)	DDR48	3644061	-0.295646	0.477916	1.236	0	no change	up	no: ATACseq no change, RNAseq up
C2_09220W_A	peak_2609	Downstream (<1kb)	DDR48	3644061	-0.0316749	0.946244	1.236	0	no change	up	no: ATACseq no change, RNAseq up
C3_03370C_A	peak_3150	Promoter (<=1kb)	NA	3638366	0.189501	0.262944	-0.247	0.512	no change	no change	same: no change
C2_07030C_A	peak_2407	Promoter (<=1kb)	NA	3643498	0.189455	0.620404	-1.851	0	no change	down	no: ATACseq no change, RNAseq down
C2_09260C_A	peak_2611	Exon (C2_09260C_A/C2_09260C_A, exon 1 of 1)	GLO2	3644067	-0.210949	0.577796	1.711	0	no change	up	no: ATACseq no change, RNAseq up
CR_09270C_A	peak_7328	Promoter (<=1kb)	CBP1	3641920	0.1888	0.472082	0.784	0.001	no change	up	no: ATACseq no change, RNAseq up
C2_09280C_A	peak_2613	Exon (C2_09280C_A/C2_09280C_A, exon 1 of 1)	NA	3644102	-0.124499	0.746111	0.641	0.058	no change	no change	same: no change
C3_04950W_A	peak_3333	Promoter (<=1kb)	ARF2	3635271	0.188782	0.332828	-0.516	0.039	no change	down	no: ATACseq no change, RNAseq down
C2_03970W_A	peak_2088	Promoter (<=1kb)	NA	3637419	0.188642	0.375923	1.254	0	no change	up	no: ATACseq no change, RNAseq up
C1_13700W_A	peak_1507	Promoter (<=1kb)	ACT1	3636195	0.188363	0.376846	-0.075	0.802	no change	no change	same: no change
CR_07890W_A	peak_7028	Promoter (1-2kb)	EFG1	3644145	0.188309	0.236019	-1.911	0	no change	down	no: ATACseq no change, RNAseq down
C2_01590W_A	peak_1819	Promoter (<=1kb)	COX13	3635784	0.187925	0.332794	-0.26	0.324	no change	no change	same: no change
C2_09360W_A	peak_2619	Exon (C2_09360W_A/C2_09360W_A, exon 1 of 1)	NA	3644109	-0.0625733	0.881887	-1.633	0	no change	down	no: ATACseq no change, RNAseq down
C1_08770W_A	peak_970	Promoter (<=1kb)	NA	3634788	0.187711	0.71361	0.064	0.845	no change	no change	same: no change
C2_09380W_A	peak_2620	5' UTR	RRP15	3648397	-0.54863	0.144389	-3.595	0	no change	down	no: ATACseq no change, RNAseq down
C4_00060W_A	peak_3760	Promoter (<=1kb)	NA	3648061	0.187518	0.495827	1.744	0	no change	up	no: ATACseq no change, RNAseq up
C5_02300C_A	peak_4762	Promoter (<=1kb)	RET2	3637714	0.187286	0.618947	-0.246	0.319	no change	no change	same: no change
C5_04100W_A	peak_4945	Promoter (<=1kb)	CDS1	3647729	0.187202	0.629228	0.732	0.005	no change	up	no: ATACseq no change, RNAseq up
C2_09430W_A	peak_2624	Distal Intergenic	RPL3	3647719	-0.149803	0.420872	-1.643	0	no change	down	no: ATACseq no change, RNAseq down
C2_09430W_A	peak_2625	Distal Intergenic	RPL3	3647719	-0.0638069	0.838001	-1.643	0	no change	down	no: ATACseq no change, RNAseq down
C2_09430W_A	peak_2626	Distal Intergenic	RPL3	3647719	-0.507103	0.104577	-1.643	0	no change	down	no: ATACseq no change, RNAseq down
C2_09430W_A	peak_2627	Distal Intergenic	RPL3	3647719	-0.217788	0.340991	-1.643	0	no change	down	no: ATACseq no change, RNAseq down
C2_09430W_A	peak_2628	Downstream (2-3kb)	RPL3	3647719	-0.211518	0.377511	-1.643	0	no change	down	no: ATACseq no change, RNAseq down
C2_09460C_A	peak_2629	Downstream (2-3kb)	RHA1	3647713	0.140642	0.696276	-0.235	0.349	no change	no change	same: no change
C1_02110C_A	peak_263	Distal Intergenic	HGT2	3644579	-0.230092	0.217354	0.208	0.495	no change	no change	same: no change
C2_09460C_A	peak_2630	Downstream (1-2kb)	RHA1	3647713	-0.0147352	0.959285	-0.235	0.349	no change	no change	same: no change
C2_09460C_A	peak_2631	Downstream (1-2kb)	RHA1	3647713	0.0675551	0.814776	-0.235	0.349	no change	no change	same: no change
C2_09460C_A	peak_2632	Downstream (1-2kb)	RHA1	3647713	-0.14575	0.620404	-0.235	0.349	no change	no change	same: no change
C2_09460C_A	peak_2633	Downstream (<1kb)	RHA1	3647713	-0.0174708	0.957587	-0.235	0.349	no change	no change	same: no change
C2_09460C_A	peak_2634	Downstream (<1kb)	RHA1	3647713	0.430259	0.105372	-0.235	0.349	no change	no change	same: no change
C2_09460C_A	peak_2635	Downstream (<1kb)	RHA1	3647713	0.0184255	0.960312	-0.235	0.349	no change	no change	same: no change
C2_09460C_A	peak_2636	Exon (C2_09460C_A/C2_09460C_A, exon 2 of 2)	RHA1	3647713	-0.103164	0.828645	-0.235	0.349	no change	no change	same: no change
C2_09460C_A	peak_2637	Exon (C2_09460C_A/C2_09460C_A, exon 2 of 2)	RHA1	3647713	-0.106178	0.791658	-0.235	0.349	no change	no change	same: no change
C4_05400C_A	peak_4308	Promoter (1-2kb)	NA	3646952	0.187141	0.518728	2.106	0	no change	up	no: ATACseq no change, RNAseq up
CR_09530C_A	peak_7365	Promoter (<=1kb)	NA	3647101	0.187053	0.567296	1.171	0	no change	up	no: ATACseq no change, RNAseq up
C1_02110C_A	peak_264	Distal Intergenic	HGT2	3644579	0.106797	0.593656	0.208	0.495	no change	no change	same: no change
C4_05170C_A	peak_4294	Promoter (<=1kb)	NBP35	NA	0.186995	0.461856	3.038	0	no change	up	no: ATACseq no change, RNAseq up
C2_09470C_A	peak_2641	Exon (C2_09470C_A/C2_09470C_A, exon 1 of 1)	PMS1	3647714	0.168946	0.730222	1.482	0	no change	up	no: ATACseq no change, RNAseq up
C1_03290W_A	peak_393	Promoter (<=1kb)	NGG1	3636902	0.186795	0.642479	0.425	0.147	no change	no change	same: no change
C4_05560C_A	peak_4321	Promoter (<=1kb)	ARO9	3641773	0.18672	0.562167	6.4	0	no change	up	no: ATACseq no change, RNAseq up
C2_09500W_A	peak_2644	Exon (C2_09500W_A/C2_09500W_A, exon 1 of 1)	NA	3643817	-0.164012	0.698334	-2.289	0	no change	down	no: ATACseq no change, RNAseq down
C2_09510C_A	peak_2645	Exon (C2_09510C_A/C2_09510C_A, exon 1 of 1)	NA	3643816	-0.411465	0.108964	-1.862	0	no change	down	no: ATACseq no change, RNAseq down
C1_01710W_A	peak_221	Promoter (<=1kb)	NA	3640201	0.186534	0.317522	-0.678	0.009	no change	down	no: ATACseq no change, RNAseq down
C2_05510C_A	peak_2233	Promoter (<=1kb)	NA	3643420	0.186526	0.674036	0.428	0.058	no change	no change	same: no change
C6_04350C_A	peak_5578	Promoter (1-2kb)	FLO8	3646292	0.186379	0.315299	-1.247	0	no change	down	no: ATACseq no change, RNAseq down
C2_09530W_A	peak_2649	Exon (C2_09530W_A/C2_09530W_A, exon 1 of 1)	EAP1	3643814	-0.398779	0.0307039	0.112	0.807	down	no change	no: ATACseq down, RNAseq no change
C1_02110C_A	peak_265	Downstream (2-3kb)	HGT2	3644579	0.377724	0.0365263	0.208	0.495	up	no change	no: ATACseq up, RNAseq no change
C2_06600W_A	peak_2348	Promoter (1-2kb)	NA	3646563	0.185874	0.290637	0.545	0.057	no change	no change	same: no change
C3_06400C_A	peak_3527	Promoter (<=1kb)	NA	3642260	0.185861	0.520538	0.463	0.054	no change	no change	same: no change
C2_00210W_A	peak_1685	Promoter (<=1kb)	RPL38	30515082	0.185745	0.340712	-2.502	0	no change	down	no: ATACseq no change, RNAseq down
C2_02870W_A	peak_1947	Promoter (<=1kb)	NA	3642972	0.185507	0.72753	0.455	0.05	no change	no change	same: no change
C1_13240W_A	peak_1452	Promoter (<=1kb)	NA	3636167	0.185501	0.657889	0.212	0.513	no change	no change	same: no change
C3_06740W_A	peak_3574	Promoter (<=1kb)	NA	3638503	0.185274	0.598579	-1.135	0	no change	down	no: ATACseq no change, RNAseq down
C2_03200W_A	peak_1993	Promoter (<=1kb)	PRP3	3637406	0.184874	0.382613	-1.83	0	no change	down	no: ATACseq no change, RNAseq down
C1_11200W_A	peak_1243	Promoter (<=1kb)	NA	3644396	0.184353	0.455077	1.329	0	no change	up	no: ATACseq no change, RNAseq up
C3_03690W_A	peak_3179	Promoter (<=1kb)	NA	3645647	0.183935	0.713752	-0.088	0.908	no change	no change	same: no change
C1_02120C_A	peak_266	Downstream (1-2kb)	SHA3	3644580	0.646538	0.000731579	-1.848	0.001	up	down	no: ATACseq up, RNAseq down
C1_00880W_A	peak_118	Promoter (1-2kb)	NA	3639355	0.183838	0.506661	-2.213	0	no change	down	no: ATACseq no change, RNAseq down
C3_05590C_A	peak_3429	Promoter (<=1kb)	BAT22	3643663	0.183462	0.381708	-0.117	0.664	no change	no change	same: no change
CR_09760W_A	peak_7389	Promoter (<=1kb)	MED21	3639010	0.182743	0.347348	0.18	0.589	no change	no change	same: no change
C5_04270C_A	peak_4962	Promoter (<=1kb)	SAH1	3636452	0.182635	0.426623	-0.723	0.004	no change	down	no: ATACseq no change, RNAseq down
C2_00790C_A	peak_1740	Promoter (<=1kb)	NA	3638907	0.182554	0.589271	-2.742	0	no change	down	no: ATACseq no change, RNAseq down
C2_10440C_A	peak_2744	Promoter (<=1kb)	RAD1	3641192	0.182513	0.604079	1.424	0	no change	up	no: ATACseq no change, RNAseq up
C1_04980C_A	peak_570	Promoter (<=1kb)	NA	3647529	0.182369	0.459259	0.709	0.003	no change	up	no: ATACseq no change, RNAseq up
C1_14110C_A	peak_1568	Promoter (<=1kb)	RPL4B	3643347	0.182179	0.396198	-1.299	0	no change	down	no: ATACseq no change, RNAseq down
C3_05900W_A	peak_3466	Promoter (<=1kb)	NA	3641739	0.181855	0.333976	-1.312	0	no change	down	no: ATACseq no change, RNAseq down
C6_02020C_A	peak_5326	Promoter (<=1kb)	NA	3647563	0.181697	0.469685	2.103	0	no change	up	no: ATACseq no change, RNAseq up
C1_02120C_A	peak_267	Downstream (1-2kb)	SHA3	3644580	0.210976	0.513921	-1.848	0.001	no change	down	no: ATACseq no change, RNAseq down
C7_01810W_A	peak_5896	Promoter (<=1kb)	RVB2	3637055	0.181697	0.525734	-0.237	0.343	no change	no change	same: no change
CR_00150C_A	peak_6196	Promoter (<=1kb)	POT1	3639707	0.181651	0.467661	1.701	0	no change	up	no: ATACseq no change, RNAseq up
C4_06530C_A	peak_4419	Promoter (1-2kb)	XUT1	3642785	0.181268	0.307619	0.12	0.836	no change	no change	same: no change
C1_00150C_A	peak_22	Promoter (<=1kb)	RIM8	3639342	0.181266	0.565379	0.696	0.095	no change	no change	same: no change
C4_06570C_A	peak_4428	Promoter (<=1kb)	PDC11	3642780	0.181237	0.262746	-0.53	0.241	no change	no change	same: no change
CR_00250W_A	peak_6211	Promoter (<=1kb)	ATP17	30515364	0.181125	0.364825	-0.119	0.709	no change	no change	same: no change
C1_13320C_A	peak_1463	Promoter (<=1kb)	NA	3636149	0.180675	0.300046	-1.066	0	no change	down	no: ATACseq no change, RNAseq down
C2_09200W_A	peak_2604	Promoter (1-2kb)	tP(UGG)2	30515157	0.180333	0.495616	-1.306	0.062	no change	no change	same: no change
C4_03570W_A	peak_4125	Promoter (1-2kb)	HWP1	3645372	0.179874	0.55146	0.448	0.385	no change	no change	same: no change
C1_03400W_A	peak_409	Promoter (<=1kb)	NA	3636904	0.179501	0.607157	-0.566	0.016	no change	down	no: ATACseq no change, RNAseq down
C1_02120C_A	peak_268	Downstream (<1kb)	SHA3	3644580	0.369136	0.139912	-1.848	0.001	no change	down	no: ATACseq no change, RNAseq down
C2_07540W_A	peak_2446	Promoter (<=1kb)	NA	3645222	0.179232	0.580629	-0.832	0.001	no change	down	no: ATACseq no change, RNAseq down
C2_03050W_A	peak_1971	Promoter (<=1kb)	SHE9	3642984	0.179128	0.606782	1.96	0	no change	up	no: ATACseq no change, RNAseq up
C2_09950W_A	peak_2693	Promoter (<=1kb)	FCY21	3643822	0.179033	0.361331	-2.517	0	no change	down	no: ATACseq no change, RNAseq down
C2_09890W_A	peak_2683	5' UTR	SMM1	3643778	-0.109316	0.78939	-3.319	0	no change	down	no: ATACseq no change, RNAseq down
C3_02320W_A	peak_3068	Promoter (<=1kb)	ILV2	3636552	0.178528	0.313935	-0.543	0.039	no change	down	no: ATACseq no change, RNAseq down
C1_06050C_A	peak_671	Promoter (<=1kb)	NA	30515003	0.178465	0.715944	-0.322	0.364	no change	no change	same: no change
C2_09930W_A	peak_2686	Exon (C2_09930W_A/C2_09930W_A, exon 1 of 1)	NA	3643824	0.198791	0.600731	1.956	0	no change	up	no: ATACseq no change, RNAseq up
C2_01200C_A	peak_1780	Promoter (<=1kb)	REG1	3638858	0.178122	0.60646	-0.547	0.027	no change	down	no: ATACseq no change, RNAseq down
C1_03820W_A	peak_452	Promoter (<=1kb)	PDR16	3644679	0.177634	0.304566	3.702	0	no change	up	no: ATACseq no change, RNAseq up
C2_09940W_A	peak_2689	Exon (C2_09940W_A/C2_09940W_A, exon 1 of 1)	GCN4	3643823	-0.333689	0.486569	1.283	0	no change	up	no: ATACseq no change, RNAseq up
C1_02120C_A	peak_269	Downstream (<1kb)	SHA3	3644580	0.32469	0.152402	-1.848	0.001	no change	down	no: ATACseq no change, RNAseq down
C2_09940W_A	peak_2690	Distal Intergenic	GCN4	3643823	-0.146742	0.630551	1.283	0	no change	up	no: ATACseq no change, RNAseq up
C2_03490C_A	peak_2032	Promoter (<=1kb)	NA	3637346	0.177333	0.37284	-0.133	0.732	no change	no change	same: no change
C1_13950C_A	peak_1555	Promoter (<=1kb)	NA	3636186	0.177189	0.540143	0.514	0.119	no change	no change	same: no change
C5_02760W_A	peak_4801	Promoter (<=1kb)	CKB2	3637741	0.17649	0.354813	-0.82	0	no change	down	no: ATACseq no change, RNAseq down
C2_09950W_A	peak_2694	Exon (C2_09950W_A/C2_09950W_A, exon 1 of 1)	FCY21	3643822	-0.479933	0.349678	-2.517	0	no change	down	no: ATACseq no change, RNAseq down
CR_09660W_A	peak_7380	Promoter (<=1kb)	NA	3647092	0.17611	0.523155	-1.642	0	no change	down	no: ATACseq no change, RNAseq down
C2_00870W_A	peak_1745	Promoter (<=1kb)	NA	3638804	0.175955	0.401173	-0.587	0.01	no change	down	no: ATACseq no change, RNAseq down
C2_01960C_A	peak_1863	Promoter (<=1kb)	NA	NA	0.175264	0.401354	-2.332	0	no change	down	no: ATACseq no change, RNAseq down
C1_05320C_A	peak_617	Promoter (<=1kb)	NA	3642470	0.175	0.684823	0.236	0.356	no change	no change	same: no change
C6_01770W_A	peak_5302	Promoter (<=1kb)	RAD18	3641637	0.174925	0.409273	1.224	0	no change	up	no: ATACseq no change, RNAseq up
C7_00310C_A	peak_5727	Promoter (<=1kb)	NA	3638045	0.174836	0.427826	0.848	0.001	no change	up	no: ATACseq no change, RNAseq up
C1_02120C_A	peak_270	Downstream (<1kb)	SHA3	3644580	0.313717	0.274491	-1.848	0.001	no change	down	no: ATACseq no change, RNAseq down
C4_00700C_A	peak_3821	Promoter (<=1kb)	NA	3645751	0.174753	0.584508	0.945	0	no change	up	no: ATACseq no change, RNAseq up
C2_10030C_A	peak_2702	Exon (C2_10030C_A/C2_10030C_A, exon 1 of 1)	MP65	3643951	-0.244183	0.397328	-1.166	0	no change	down	no: ATACseq no change, RNAseq down
C1_09320C_A	peak_1040	Promoter (1-2kb)	NA	3634834	0.17469	0.590686	-0.824	0.001	no change	down	no: ATACseq no change, RNAseq down
C2_01020W_A	peak_1763	Promoter (<=1kb)	HGT6	3638873	0.174683	0.32793	0.305	0.307	no change	no change	same: no change
C5_05230C_A	peak_5060	Promoter (<=1kb)	NA	3636470	0.174396	0.496627	-1.23	0	no change	down	no: ATACseq no change, RNAseq down
C1_10240C_A	peak_1136	Promoter (<=1kb)	NA	3634881	0.173205	0.658975	2.257	0	no change	up	no: ATACseq no change, RNAseq up
C4_05970W_A	peak_4366	Promoter (<=1kb)	NA	3646514	0.173124	0.419715	0.538	0.013	no change	up	no: ATACseq no change, RNAseq up
C1_02120C_A	peak_271	Exon (C1_02120C_A/C1_02120C_A, exon 1 of 1)	SHA3	3644580	0.498083	0.379588	-1.848	0.001	no change	down	no: ATACseq no change, RNAseq down
C1_13810W_A	peak_1516	Promoter (<=1kb)	NA	3636126	0.173069	0.502357	-1.637	0	no change	down	no: ATACseq no change, RNAseq down
C3_07310C_A	peak_3648	Promoter (<=1kb)	SLK19	3638466	0.173066	0.349087	1.025	0.003	no change	up	no: ATACseq no change, RNAseq up
C1_04400C_A	peak_513	Promoter (<=1kb)	APE2	3647990	0.172724	0.316404	-0.057	0.851	no change	no change	same: no change
C1_10640C_A	peak_1185	Promoter (<=1kb)	PEA2	3647673	0.172723	0.423694	-1.439	0	no change	down	no: ATACseq no change, RNAseq down
C7_00750W_A	peak_5780	Promoter (<=1kb)	ACB1	30515350	0.172699	0.380539	0.671	0.12	no change	no change	same: no change
C2_10180W_A	peak_2715	5' UTR	IFR1	3643930	0.948095	0.0156308	6.046	0	up	up	same: up
C2_03440W_A	peak_2028	Promoter (<=1kb)	PGA33	3637350	0.17266	0.520071	-0.534	0.096	no change	no change	same: no change
C4_04800W_A	peak_4254	Promoter (<=1kb)	NA	3641113	0.172427	0.442915	-1.323	0	no change	down	no: ATACseq no change, RNAseq down
C2_07550W_A	peak_2447	Promoter (<=1kb)	NA	3645221	0.172306	0.583846	-0.869	0.001	no change	down	no: ATACseq no change, RNAseq down
CR_05700C_A	peak_6774	Promoter (<=1kb)	NA	3646701	0.172238	0.601247	-0.152	0.678	no change	no change	same: no change
C6_02210W_A	peak_5345	Promoter (<=1kb)	NA	3645864	0.17222	0.560789	3.466	0	no change	up	no: ATACseq no change, RNAseq up
CR_03020C_A	peak_6520	Promoter (<=1kb)	NA	3642598	0.171875	0.496448	-1.445	0	no change	down	no: ATACseq no change, RNAseq down
C2_08920W_A	peak_2571	Promoter (<=1kb)	NA	3645797	0.171826	0.428733	-0.953	0	no change	down	no: ATACseq no change, RNAseq down
C2_01020W_A	peak_1762	Promoter (1-2kb)	HGT6	3638873	0.171416	0.550959	0.305	0.307	no change	no change	same: no change
C1_13300C_A	peak_1461	Promoter (<=1kb)	RPN1	3636147	0.171247	0.428733	1.529	0	no change	up	no: ATACseq no change, RNAseq up
C2_10240W_A	peak_2724	Distal Intergenic	GPD1	3643924	0.251243	0.30433	-0.574	0.064	no change	no change	same: no change
C2_10740C_A	peak_2789	Promoter (<=1kb)	NA	3641236	0.170813	0.601203	-0.617	0.011	no change	down	no: ATACseq no change, RNAseq down
C5_00330C_A	peak_4552	Promoter (<=1kb)	NA	3641556	0.170582	0.588425	0.033	0.9	no change	no change	same: no change
C2_10280C_A	peak_2727	Exon (C2_10280C_A/C2_10280C_A, exon 1 of 1)	SPT23	3643958	0.212031	0.696273	0.02	0.958	no change	no change	same: no change
CR_02850C_A	peak_6494	Promoter (<=1kb)	GZF3	3642563	0.170552	0.567357	-1.4	0	no change	down	no: ATACseq no change, RNAseq down
C2_09060C_A	peak_2590	Promoter (<=1kb)	ASN1	3645790	0.17026	0.359888	-0.87	0.001	no change	down	no: ATACseq no change, RNAseq down
C2_03910C_A	peak_2083	Promoter (<=1kb)	NA	3637426	0.169935	0.586905	2.141	0	no change	up	no: ATACseq no change, RNAseq up
C1_03330C_A	peak_398	Promoter (<=1kb)	NA	3636859	0.169803	0.589271	1.691	0	no change	up	no: ATACseq no change, RNAseq up
C3_03290C_A	peak_3144	Promoter (<=1kb)	NPR2	3638360	0.169618	0.508656	0.616	0.005	no change	up	no: ATACseq no change, RNAseq up
C2_10350C_A	peak_2732	5' UTR	ACS1	3643941	-0.081266	0.743841	-0.819	0	no change	down	no: ATACseq no change, RNAseq down
C7_01390W_A	peak_5842	Promoter (<=1kb)	NA	3645892	0.169124	0.368418	-2.282	0	no change	down	no: ATACseq no change, RNAseq down
C6_00840W_A	peak_5203	Promoter (<=1kb)	GPX2	3644009	0.168761	0.54658	-0.313	0.267	no change	no change	same: no change
C4_02450W_A	peak_4005	Promoter (<=1kb)	NA	3637845	0.168484	0.423289	0.367	0.235	no change	no change	same: no change
C1_01830C_A	peak_236	Promoter (<=1kb)	UBC8	3645433	0.168326	0.401354	2.851	0	no change	up	no: ATACseq no change, RNAseq up
C2_10420W_A	peak_2737	Distal Intergenic	FGR6-4	30515164	0.0964273	0.679715	0.626	0.085	no change	no change	same: no change
C2_10420W_A	peak_2738	Distal Intergenic	FGR6-4	30515164	-0.628329	0.118468	0.626	0.085	no change	no change	same: no change
C7_03860W_A	peak_6088	Promoter (<=1kb)	NA	3643144	0.168209	0.362159	2.622	0	no change	up	no: ATACseq no change, RNAseq up
C1_02130C_A	peak_274	Downstream (1-2kb)	GAL1	3644581	-0.158748	0.656789	-1.294	0	no change	down	no: ATACseq no change, RNAseq down
C2_10430C_A	peak_2740	Downstream (1-2kb)	FGR29	3641190	-0.0976228	0.802392	-3.123	0	no change	down	no: ATACseq no change, RNAseq down
C2_10430C_A	peak_2741	Downstream (<1kb)	FGR29	3641190	-0.26166	0.231483	-3.123	0	no change	down	no: ATACseq no change, RNAseq down
C2_10430C_A	peak_2742	Downstream (<1kb)	FGR29	3641190	-0.132692	0.716871	-3.123	0	no change	down	no: ATACseq no change, RNAseq down
CR_09160C_A	peak_7313	Promoter (1-2kb)	ERG13	3641881	0.168058	0.719473	-1.449	0	no change	down	no: ATACseq no change, RNAseq down
C2_09750W_A	peak_2669	Promoter (<=1kb)	LEU42	3643808	0.168011	0.355244	2.424	0	no change	up	no: ATACseq no change, RNAseq up
C2_10450W_A	peak_2745	Exon (C2_10450W_A/C2_10450W_A, exon 1 of 1)	NCE4	3641194	-0.115038	0.797042	1.463	0	no change	up	no: ATACseq no change, RNAseq up
C7_03780C_A	peak_6082	Promoter (<=1kb)	NA	3643119	0.16766	0.553881	4.297	0	no change	up	no: ATACseq no change, RNAseq up
C6_00660C_A	peak_5175	Promoter (<=1kb)	NA	3647133	0.16728	0.489009	-1.111	0	no change	down	no: ATACseq no change, RNAseq down
C2_10480W_A	peak_2748	Exon (C2_10480W_A/C2_10480W_A, exon 1 of 1)	MDH1-3	3641197	-0.38966	0.152975	0.849	0	no change	up	no: ATACseq no change, RNAseq up
C2_10490C_A	peak_2749	Exon (C2_10480W_A/C2_10480W_A, exon 1 of 1)	tV(UAC)1	30515165	-0.415098	0.0236498	-0.854	0.225	down	no change	no: ATACseq down, RNAseq no change
C1_02130C_A	peak_275	Downstream (<1kb)	GAL1	3644581	0.958399	0.0628656	-1.294	0	no change	down	no: ATACseq no change, RNAseq down
C2_10530C_A	peak_2753	Exon (C2_10530C_A/C2_10530C_A, exon 1 of 1)	KIN3	3641199	0.0548453	0.88772	1.312	0	no change	up	no: ATACseq no change, RNAseq up
C2_10530C_A	peak_2754	Exon (C2_10530C_A/C2_10530C_A, exon 1 of 1)	KIN3	3641199	0.0555022	0.859675	1.312	0	no change	up	no: ATACseq no change, RNAseq up
C2_10540W_A	peak_2755	Exon (C2_10540W_A/C2_10540W_A, exon 1 of 1)	NA	3641200	0.0650744	0.877186	-3.173	0	no change	down	no: ATACseq no change, RNAseq down
C2_10540W_A	peak_2756	Exon (C2_10540W_A/C2_10540W_A, exon 1 of 1)	NA	3641200	-0.352571	0.137884	-3.173	0	no change	down	no: ATACseq no change, RNAseq down
C2_10540W_A	peak_2757	Exon (C2_10550C_A/C2_10550C_A, exon 1 of 1)	NA	3641200	0.0960984	0.738492	-3.173	0	no change	down	no: ATACseq no change, RNAseq down
C2_10540W_A	peak_2758	Exon (C2_10550C_A/C2_10550C_A, exon 1 of 1)	NA	3641200	-0.101966	0.754281	-3.173	0	no change	down	no: ATACseq no change, RNAseq down
C2_10540W_A	peak_2759	Exon (C2_10550C_A/C2_10550C_A, exon 1 of 1)	NA	3641200	-0.637072	0.0296477	-3.173	0	down	down	same: down
C1_02130C_A	peak_276	Exon (C1_02130C_A/C1_02130C_A, exon 1 of 1)	GAL1	3644581	0.165012	0.770585	-1.294	0	no change	down	no: ATACseq no change, RNAseq down
C2_10540W_A	peak_2760	Exon (C2_10550C_A/C2_10550C_A, exon 1 of 1)	NA	3641200	-0.541145	0.0800059	-3.173	0	no change	down	no: ATACseq no change, RNAseq down
C2_10550C_A	peak_2761	Exon (C2_10550C_A/C2_10550C_A, exon 1 of 1)	GCN1	3641256	-0.0334731	0.956274	-2.249	0	no change	down	no: ATACseq no change, RNAseq down
C2_10560C_A	peak_2762	Exon (C2_10560C_A/C2_10560C_A, exon 1 of 1)	ZSF1	3641257	-0.344353	0.291018	0.428	0.156	no change	no change	same: no change
C4_04570W_A	peak_4219	Promoter (<=1kb)	RCE1	3641104	0.167183	0.614104	0.514	0.015	no change	up	no: ATACseq no change, RNAseq up
C2_10570W_A	peak_2764	Exon (C2_10570W_A/C2_10570W_A, exon 1 of 1)	SGS1	3641258	-0.23667	0.420457	0.643	0.012	no change	up	no: ATACseq no change, RNAseq up
CR_07920W_A	peak_7038	Promoter (<=1kb)	NA	3644141	0.167162	0.481839	-0.653	0.002	no change	down	no: ATACseq no change, RNAseq down
C2_02590W_A	peak_1926	Promoter (<=1kb)	ZRT2	3635861	0.166499	0.41766	-3.682	0	no change	down	no: ATACseq no change, RNAseq down
CR_06170W_A	peak_6836	Promoter (<=1kb)	NA	3644865	0.16645	0.535165	-0.126	0.64	no change	no change	same: no change
C3_04470W_A	peak_3264	Promoter (<=1kb)	PKC1	3635210	0.166293	0.582179	0.216	0.391	no change	no change	same: no change
C2_04680W_A	peak_2154	Promoter (<=1kb)	TIM17	3647790	0.166209	0.525516	-1.659	0	no change	down	no: ATACseq no change, RNAseq down
C2_10600W_A	peak_2770	Exon (C2_10600W_A/C2_10600W_A, exon 1 of 1)	NA	3641245	0.370034	0.089624	2.922	0	no change	up	no: ATACseq no change, RNAseq up
C5_02240W_A	peak_4753	Promoter (1-2kb)	PTH2	3637709	0.16591	0.437916	-0.756	0.043	no change	down	no: ATACseq no change, RNAseq down
C2_10790C_A	peak_2794	Promoter (<=1kb)	NA	3641242	0.165868	0.630516	-0.314	0.23	no change	no change	same: no change
C2_10630W_A	peak_2773	Exon (C2_10630W_A/C2_10630W_A, exon 1 of 1)	NA	3641248	-0.295932	0.307619	0.347	0.16	no change	no change	same: no change
C2_10630W_A	peak_2774	Exon (C2_10630W_A/C2_10630W_A, exon 1 of 1)	NA	3641248	-0.626479	0.105181	0.347	0.16	no change	no change	same: no change
C2_10640C_A	peak_2775	Exon (C2_10630W_A/C2_10630W_A, exon 1 of 1)	MTR2	30515167	-0.0616844	0.856289	-1.913	0	no change	down	no: ATACseq no change, RNAseq down
CR_08990C_A	peak_7277	Promoter (1-2kb)	SLP3	3641891	0.165761	0.690949	0.928	0.003	no change	up	no: ATACseq no change, RNAseq up
C2_10650W_A	peak_2777	Downstream (2-3kb)	NA	30515168	-0.318465	0.0681368	-2.871	0	no change	down	no: ATACseq no change, RNAseq down
CR_09010C_A	peak_7281	Promoter (<=1kb)	NA	3641892	0.165665	0.534748	2.242	0	no change	up	no: ATACseq no change, RNAseq up
C2_03260W_A	peak_2007	Promoter (<=1kb)	NA	3637432	0.16546	0.574075	1.269	0	no change	up	no: ATACseq no change, RNAseq up
C7_04020C_A	peak_6101	Promoter (<=1kb)	PRE5	3643111	0.165412	0.520976	2.014	0	no change	up	no: ATACseq no change, RNAseq up
C1_13200C_A	peak_1448	Promoter (<=1kb)	REX3	3636164	0.165131	0.371287	-1.485	0	no change	down	no: ATACseq no change, RNAseq down
C2_10670W_A	peak_2781	Exon (C2_10670W_A/C2_10670W_A, exon 1 of 1)	NA	3641251	-0.394463	0.0536418	2.041	0	no change	up	no: ATACseq no change, RNAseq up
C2_06810C_A	peak_2387	Promoter (<=1kb)	RPL11	3643489	0.165084	0.511191	-2.543	0	no change	down	no: ATACseq no change, RNAseq down
C6_03480W_A	peak_5462	Promoter (<=1kb)	YMX6	3640255	0.164788	0.632772	3.272	0	no change	up	no: ATACseq no change, RNAseq up
C2_10690W_A	peak_2784	Exon (C2_10690W_A/C2_10690W_A, exon 2 of 2)	TPS3	3641205	-0.0571973	0.892758	0.981	0	no change	up	no: ATACseq no change, RNAseq up
C2_10700C_A	peak_2785	Exon (C2_10690W_A/C2_10690W_A, exon 2 of 2)	NA	3641207	0.585172	0.094294	1.327	0	no change	up	no: ATACseq no change, RNAseq up
C2_10720C_A	peak_2786	Exon (C2_10720C_A/C2_10720C_A, exon 1 of 1)	NA	3641209	-0.489086	0.0666831	-0.604	0.011	no change	down	no: ATACseq no change, RNAseq down
C6_00310W_A	peak_5134	Promoter (<=1kb)	NA	3646071	0.164721	0.401354	0.959	0	no change	up	no: ATACseq no change, RNAseq up
C2_10740C_A	peak_2788	Exon (C2_10740C_A/C2_10740C_A, exon 1 of 1)	NA	3641236	-0.26173	0.501865	-0.617	0.011	no change	down	no: ATACseq no change, RNAseq down
C1_08240C_A	peak_916	Promoter (<=1kb)	NA	3640759	0.164585	0.683375	0.056	0.9	no change	no change	same: no change
C1_12590W_A	peak_1389	Promoter (<=1kb)	ATP20	3647602	0.164316	0.418024	-1.018	0	no change	down	no: ATACseq no change, RNAseq down
C2_10770W_A	peak_2790	Exon (C2_10770W_A/C2_10770W_A, exon 1 of 1)	RPC11	3641239	-0.303441	0.340712	-1.785	0	no change	down	no: ATACseq no change, RNAseq down
C2_10770W_A	peak_2791	Exon (C2_10780C_A/C2_10780C_A, exon 1 of 1)	RPC11	3641239	-0.361693	0.237567	-1.785	0	no change	down	no: ATACseq no change, RNAseq down
C2_10780C_A	peak_2792	Exon (C2_10780C_A/C2_10780C_A, exon 1 of 1)	PSO2	3641241	-0.343502	0.267737	-1.423	0	no change	down	no: ATACseq no change, RNAseq down
C6_03300C_A	peak_5441	Promoter (<=1kb)	NA	3639196	0.164294	0.537998	1.695	0	no change	up	no: ATACseq no change, RNAseq up
C3_03160C_A	peak_3131	Promoter (<=1kb)	NA	3638424	0.163751	0.562167	0.945	0	no change	up	no: ATACseq no change, RNAseq up
C4_02140C_A	peak_3968	Promoter (<=1kb)	TIM10	30515247	0.163661	0.671204	0.065	0.828	no change	no change	same: no change
C2_10810W_A	peak_2796	Exon (C2_10820C_A/C2_10820C_A, exon 1 of 1)	NA	3641243	0.313336	0.43419	-1.862	0	no change	down	no: ATACseq no change, RNAseq down
C3_01470W_A	peak_2987	Promoter (<=1kb)	ARF3	3636628	0.163057	0.465784	0.498	0.02	no change	up	no: ATACseq no change, RNAseq up
C2_10840W_A	peak_2798	Exon (C2_10840W_A/C2_10840W_A, exon 1 of 1)	RDH54	3641231	0.279695	0.489531	1.725	0	no change	up	no: ATACseq no change, RNAseq up
C2_10840W_A	peak_2799	Exon (C2_10840W_A/C2_10840W_A, exon 1 of 1)	RDH54	3641231	0.0924478	0.849035	1.725	0	no change	up	no: ATACseq no change, RNAseq up
C1_00180W_A	peak_28	Exon (C1_00180W_A/C1_00180W_A, exon 1 of 1)	RPL16A	3639338	-0.5861	0.0671406	-2.137	0	no change	down	no: ATACseq no change, RNAseq down
C7_01750W_A	peak_5884	Promoter (<=1kb)	NA	3637009	0.162979	0.574461	-0.673	0.012	no change	down	no: ATACseq no change, RNAseq down
C2_10850C_A	peak_2800	Exon (C2_10840W_A/C2_10840W_A, exon 1 of 1)	NA	3641232	-0.0192977	0.960275	1.002	0.007	no change	up	no: ATACseq no change, RNAseq up
C2_10850C_A	peak_2801	Exon (C2_10850C_A/C2_10850C_A, exon 1 of 1)	NA	3641232	-0.316096	0.235191	1.002	0.007	no change	up	no: ATACseq no change, RNAseq up
C3_01420C_A	peak_2981	Promoter (<=1kb)	NA	3636634	0.162895	0.758027	0.779	0.001	no change	up	no: ATACseq no change, RNAseq up
C2_10870W_A	peak_2803	Exon (C2_10870W_A/C2_10870W_A, exon 1 of 1)	NA	3641234	-0.264881	0.332242	2.215	0	no change	up	no: ATACseq no change, RNAseq up
C2_10870W_A	peak_2804	Distal Intergenic	NA	3641234	-0.28459	0.181717	2.215	0	no change	up	no: ATACseq no change, RNAseq up
C2_10870W_A	peak_2805	Distal Intergenic	NA	3641234	-0.0738165	0.918626	2.215	0	no change	up	no: ATACseq no change, RNAseq up
C2_03780C_A	peak_2074	Promoter (<=1kb)	NA	3637368	0.16257	0.690949	0.054	0.864	no change	no change	same: no change
C3_00030C_A	peak_2815	Exon (C3_00030C_A/C3_00030C_A, exon 1 of 1)	NA	3640571	-0.169448	0.305929	-0.007	1	no change	no change	same: no change
C6_04080W_A	peak_5543	Promoter (<=1kb)	NA	3647837	0.162284	0.670597	0.091	0.741	no change	no change	same: no change
C3_00060W_A	peak_2819	Downstream (1-2kb)	TLO7	3640569	0.0320016	0.943016	1.627	0	no change	up	no: ATACseq no change, RNAseq up
C2_09140C_A	peak_2598	Promoter (<=1kb)	MET10	3644088	0.162231	0.642479	-0.398	0.245	no change	no change	same: no change
C3_04870W_A	peak_3321	Promoter (1-2kb)	NA	3635226	0.161912	0.563902	2.599	0	no change	up	no: ATACseq no change, RNAseq up
C2_10810W_A	peak_2795	Promoter (<=1kb)	NA	3641243	0.161897	0.598647	-1.862	0	no change	down	no: ATACseq no change, RNAseq down
C3_00100W_A	peak_2822	Exon (C3_00100W_A/C3_00100W_A, exon 1 of 1)	NA	3640567	-0.187629	0.574898	-2.059	0	no change	down	no: ATACseq no change, RNAseq down
C3_00100W_A	peak_2823	Exon (C3_00100W_A/C3_00100W_A, exon 1 of 1)	NA	3640567	-0.325393	0.182358	-2.059	0	no change	down	no: ATACseq no change, RNAseq down
C3_00110C_A	peak_2826	Exon (C3_00110C_A/C3_00110C_A, exon 1 of 1)	SEC6	3640565	-0.159102	0.606782	-0.038	0.964	no change	no change	same: no change
CR_09300C_A	peak_7332	Promoter (<=1kb)	SCO1	3641922	0.161891	0.557217	-0.401	0.106	no change	no change	same: no change
CR_07390C_A	peak_6961	Promoter (<=1kb)	MRPL8	3646039	0.161833	0.531479	-1.682	0	no change	down	no: ATACseq no change, RNAseq down
C2_03520C_A	peak_2045	Promoter (<=1kb)	ADAEC	3637342	0.161443	0.328701	0.415	0.102	no change	no change	same: no change
C3_00180C_A	peak_2836	5' UTR	DAL1	3640564	-0.250657	0.228004	-1.69	0	no change	down	no: ATACseq no change, RNAseq down
C1_04200C_A	peak_489	Promoter (<=1kb)	NA	3644718	0.160981	0.506094	-0.3	0.185	no change	no change	same: no change
C1_01640W_A	peak_209	Promoter (<=1kb)	RPS42	3640195	0.160963	0.535165	-2.943	0	no change	down	no: ATACseq no change, RNAseq down
C3_00220W_A	peak_2839	Exon (C3_00220W_A/C3_00220W_A, exon 1 of 1)	HGT19	3640558	-0.381767	0.169561	0.254	0.585	no change	no change	same: no change
C3_02260C_A	peak_3060	Promoter (<=1kb)	NA	3636636	0.160941	0.727699	1.183	0	no change	up	no: ATACseq no change, RNAseq up
C3_00250C_A	peak_2841	Exon (C3_00250C_A/C3_00250C_A, exon 1 of 1)	TIM44	3640529	-0.250857	0.44812	-1.493	0	no change	down	no: ATACseq no change, RNAseq down
C1_10400C_A	peak_1162	Promoter (<=1kb)	FGR41	3634839	0.160673	0.465255	-1.293	0	no change	down	no: ATACseq no change, RNAseq down
C1_10090C_A	peak_1113	Promoter (<=1kb)	NA	3634817	0.160647	0.559158	0.906	0.001	no change	up	no: ATACseq no change, RNAseq up
C3_00280C_A	peak_2844	Exon (C3_00280C_A/C3_00280C_A, exon 1 of 1)	ULP3	3640526	0.182091	0.652665	0.168	0.668	no change	no change	same: no change
C3_00280C_A	peak_2845	5' UTR	ULP3	3640526	0.244345	0.416305	0.168	0.668	no change	no change	same: no change
C1_03550C_A	peak_422	Promoter (<=1kb)	COQ6	3636878	0.160589	0.713752	0.143	0.534	no change	no change	same: no change
C3_03390C_A	peak_3155	Promoter (<=1kb)	YAH1	3638368	0.160551	0.440483	-0.347	0.221	no change	no change	same: no change
CR_07460C_A	peak_6969	Promoter (<=1kb)	NA	3646049	0.160538	0.396827	-0.907	0	no change	down	no: ATACseq no change, RNAseq down
C3_00310C_A	peak_2849	Exon (C3_00310C_A/C3_00310C_A, exon 1 of 1)	NA	3640523	-0.0479898	0.893023	2.262	0	no change	up	no: ATACseq no change, RNAseq up
C4_07220C_A	peak_4492	Promoter (<=1kb)	NA	3642955	0.160405	0.462408	1.356	0	no change	up	no: ATACseq no change, RNAseq up
CR_07700W_A	peak_6994	Promoter (<=1kb)	NA	3648195	0.160283	0.710754	1.124	0	no change	up	no: ATACseq no change, RNAseq up
C4_02650C_A	peak_4028	Promoter (<=1kb)	NA	30515249	0.160278	0.574964	0.188	0.871	no change	no change	same: no change
C2_00330C_A	peak_1696	Promoter (<=1kb)	HIR1	3638796	0.160198	0.670677	1.07	0	no change	up	no: ATACseq no change, RNAseq up
C2_01060C_A	peak_1767	Promoter (<=1kb)	NA	3638835	0.160096	0.748087	-3.714	0	no change	down	no: ATACseq no change, RNAseq down
C3_03760W_A	peak_3187	Promoter (<=1kb)	NA	3645638	0.159882	0.618568	0.76	0.002	no change	up	no: ATACseq no change, RNAseq up
C3_00360W_A	peak_2855	Exon (C3_00360W_A/C3_00360W_A, exon 1 of 1)	NA	3640542	0.0182926	0.966392	0.796	0.053	no change	no change	same: no change
C2_09970C_A	peak_2696	Promoter (<=1kb)	NA	3643820	0.159611	0.522854	-0.425	0.064	no change	no change	same: no change
C1_00240C_A	peak_40	Promoter (<=1kb)	tT(AGU)6	30514952	0.159594	0.367784	-1.283	0.114	no change	no change	same: no change
C7_00930W_A	peak_5801	Promoter (<=1kb)	GPH1	3637956	0.159552	0.399917	1.166	0	no change	up	no: ATACseq no change, RNAseq up
C2_10590W_A	peak_2768	Promoter (<=1kb)	GAL4	3641244	0.159454	0.374781	0.17	0.683	no change	no change	same: no change
C1_01250W_A	peak_166	Promoter (<=1kb)	NA	3640212	0.159391	0.702778	-0.68	0.012	no change	down	no: ATACseq no change, RNAseq down
C5_00480C_A	peak_4572	Promoter (<=1kb)	SEC14	3641542	0.159303	0.385316	-1.108	0	no change	down	no: ATACseq no change, RNAseq down
C3_00470W_A	peak_2861	Exon (C3_00470W_A/C3_00470W_A, exon 1 of 1)	NA	3640520	-0.621939	0.117649	-0.674	0.001	no change	down	no: ATACseq no change, RNAseq down
C5_04330W_A	peak_4969	Promoter (<=1kb)	NA	30515314	0.159177	0.665657	0.321	0.143	no change	no change	same: no change
C3_00490W_A	peak_2863	5' UTR	ESA1	3640518	0.02171	0.960737	0.797	0	no change	up	no: ATACseq no change, RNAseq up
C3_04080W_A	peak_3236	Promoter (<=1kb)	NA	30515200	0.158881	0.469128	-1.019	0	no change	down	no: ATACseq no change, RNAseq down
C2_05720C_A	peak_2271	Promoter (<=1kb)	NA	3645574	0.158833	0.423293	1.189	0	no change	up	no: ATACseq no change, RNAseq up
C3_00540C_A	peak_2866	Exon (C3_00540C_A/C3_00540C_A, exon 1 of 1)	IST1	3640587	0.198406	0.557507	1.173	0	no change	up	no: ATACseq no change, RNAseq up
C1_01040W_A	peak_138	Promoter (<=1kb)	NA	3640183	0.158345	0.742203	2.566	0	no change	up	no: ATACseq no change, RNAseq up
C2_07220W_A	peak_2423	Promoter (<=1kb)	NA	3643483	0.158266	0.748087	1.531	0	no change	up	no: ATACseq no change, RNAseq up
C3_00560C_A	peak_2869	5' UTR	SOF1	3640585	0.0640771	0.883932	-3.636	0	no change	down	no: ATACseq no change, RNAseq down
C5_02380W_A	peak_4770	Promoter (<=1kb)	NA	3637794	0.158117	0.377686	3.289	0	no change	up	no: ATACseq no change, RNAseq up
C3_07320W_A	peak_3652	Promoter (<=1kb)	MDS3	3638464	0.157669	0.555973	-0.461	0.072	no change	no change	same: no change
CR_10140W_A	peak_7439	Promoter (<=1kb)	NA	3638972	0.157527	0.412253	-1.132	0	no change	down	no: ATACseq no change, RNAseq down
C7_03390C_A	peak_6051	Promoter (<=1kb)	PUP3	3646718	0.157423	0.580893	1.979	0	no change	up	no: ATACseq no change, RNAseq up
C4_02270C_A	peak_3975	Promoter (<=1kb)	BFR1	3635579	0.157401	0.425187	-1.649	0	no change	down	no: ATACseq no change, RNAseq down
C3_04520C_A	peak_3276	Promoter (1-2kb)	ADE2	3635259	0.157056	0.618405	-1.646	0	no change	down	no: ATACseq no change, RNAseq down
C1_14120C_A	peak_1571	Promoter (<=1kb)	RBE1	3643317	0.157056	0.392622	-3.729	0	no change	down	no: ATACseq no change, RNAseq down
C6_00600C_A	peak_5172	Promoter (<=1kb)	YHM2	3647137	0.156663	0.403556	-0.546	0.028	no change	down	no: ATACseq no change, RNAseq down
C7_01700W_A	peak_5880	Promoter (<=1kb)	NA	3637013	0.156608	0.374788	3.112	0	no change	up	no: ATACseq no change, RNAseq up
C7_01930C_A	peak_5910	Promoter (1-2kb)	NA	3637027	0.156567	0.569841	1.277	0	no change	up	no: ATACseq no change, RNAseq up
C7_02040C_A	peak_5939	Promoter (<=1kb)	CUP9	3636950	0.156137	0.341622	-0.75	0.006	no change	down	no: ATACseq no change, RNAseq down
C3_00720W_A	peak_2894	Promoter (<=1kb)	PMA1	3640531	0.155718	0.325602	-1.387	0	no change	down	no: ATACseq no change, RNAseq down
CR_02510W_A	peak_6435	Promoter (<=1kb)	NA	3647694	0.155201	0.584508	1.204	0	no change	up	no: ATACseq no change, RNAseq up
C5_00960W_A	peak_4629	Promoter (<=1kb)	tE(UUC)4	30515294	0.155116	0.363028	-2.049	0	no change	down	no: ATACseq no change, RNAseq down
C4_04660C_A	peak_4237	Promoter (<=1kb)	NA	3641150	0.155063	0.465969	2.402	0	no change	up	no: ATACseq no change, RNAseq up
C7_02090C_A	peak_5943	Promoter (<=1kb)	NA	3637024	0.154999	0.6961	0.927	0	no change	up	no: ATACseq no change, RNAseq up
C1_03490W_A	peak_417	Promoter (<=1kb)	NA	3636914	0.154804	0.440461	-1.323	0	no change	down	no: ATACseq no change, RNAseq down
C4_01140C_A	peak_3877	Promoter (<=1kb)	NA	3635657	0.154686	0.44569	-0.35	0.507	no change	no change	same: no change
CR_09200C_A	peak_7321	Promoter (<=1kb)	UGA33	3641886	0.154292	0.484612	0.671	0.005	no change	up	no: ATACseq no change, RNAseq up
CR_09970W_A	peak_7421	Promoter (<=1kb)	UBC4	3638927	0.153856	0.631977	1.22	0	no change	up	no: ATACseq no change, RNAseq up
C1_06650W_A	peak_740	Promoter (<=1kb)	NAA20	3639543	0.153792	0.525734	1.039	0	no change	up	no: ATACseq no change, RNAseq up
C6_00490W_A	peak_5163	Promoter (<=1kb)	NA	3647150	0.15361	0.456857	-0.044	0.889	no change	no change	same: no change
C5_02470W_A	peak_4778	Promoter (<=1kb)	INT1	3637761	0.153241	0.55146	-2.521	0	no change	down	no: ATACseq no change, RNAseq down
[truncated: 5,078 more rows]
