# Supplementary figures and images for: ATAC-Seq Identifies Chromatin Landscapes Linked to the Regulation of Oxidative Stress in the Human Fungal Pathogen Candida albicans
Source: MDPI journal article supplement (doi:10.3390/jof6030182), 2020-09-21

# Figure S3

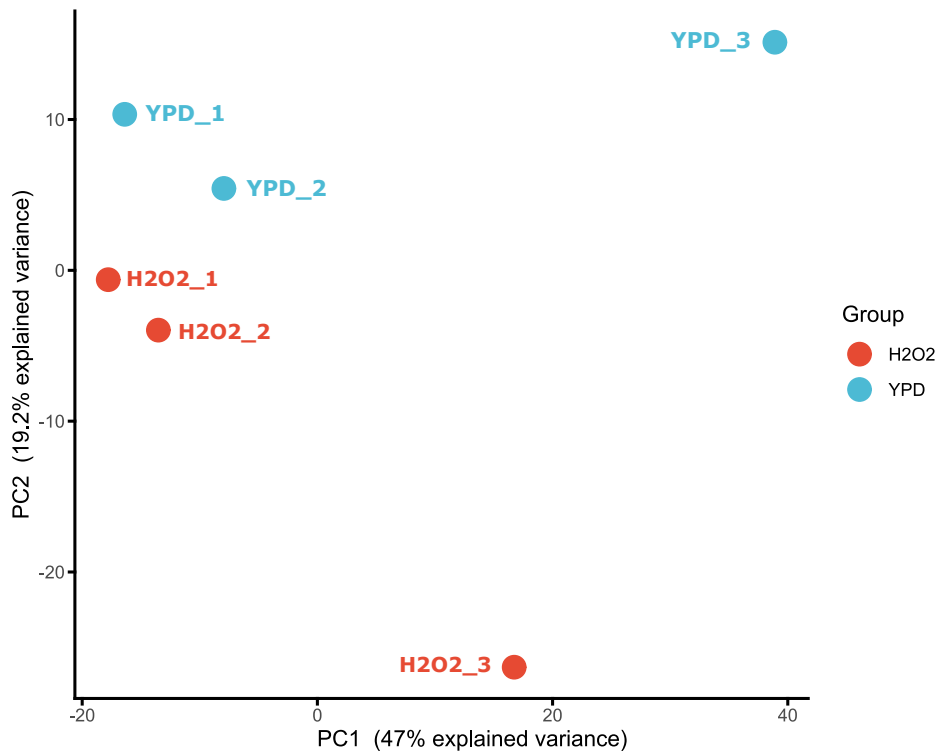

Supplement: s1 [file s1]

# Figure S2

## A

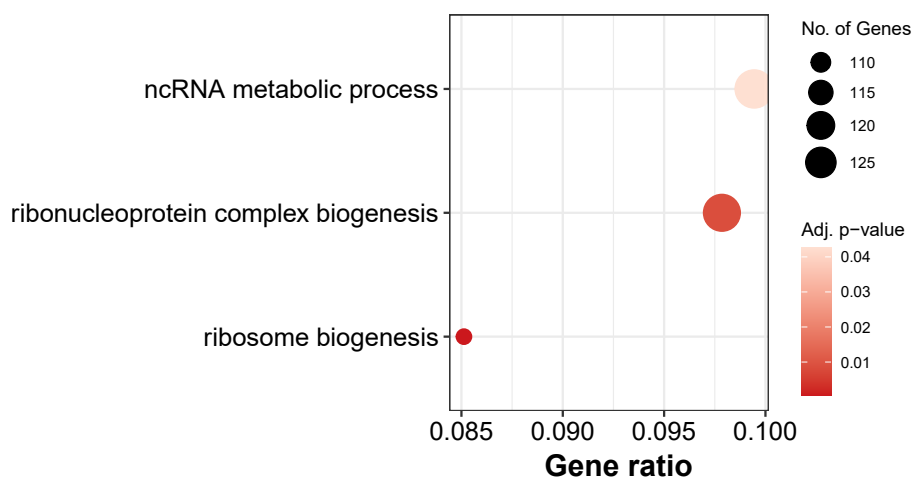

## B

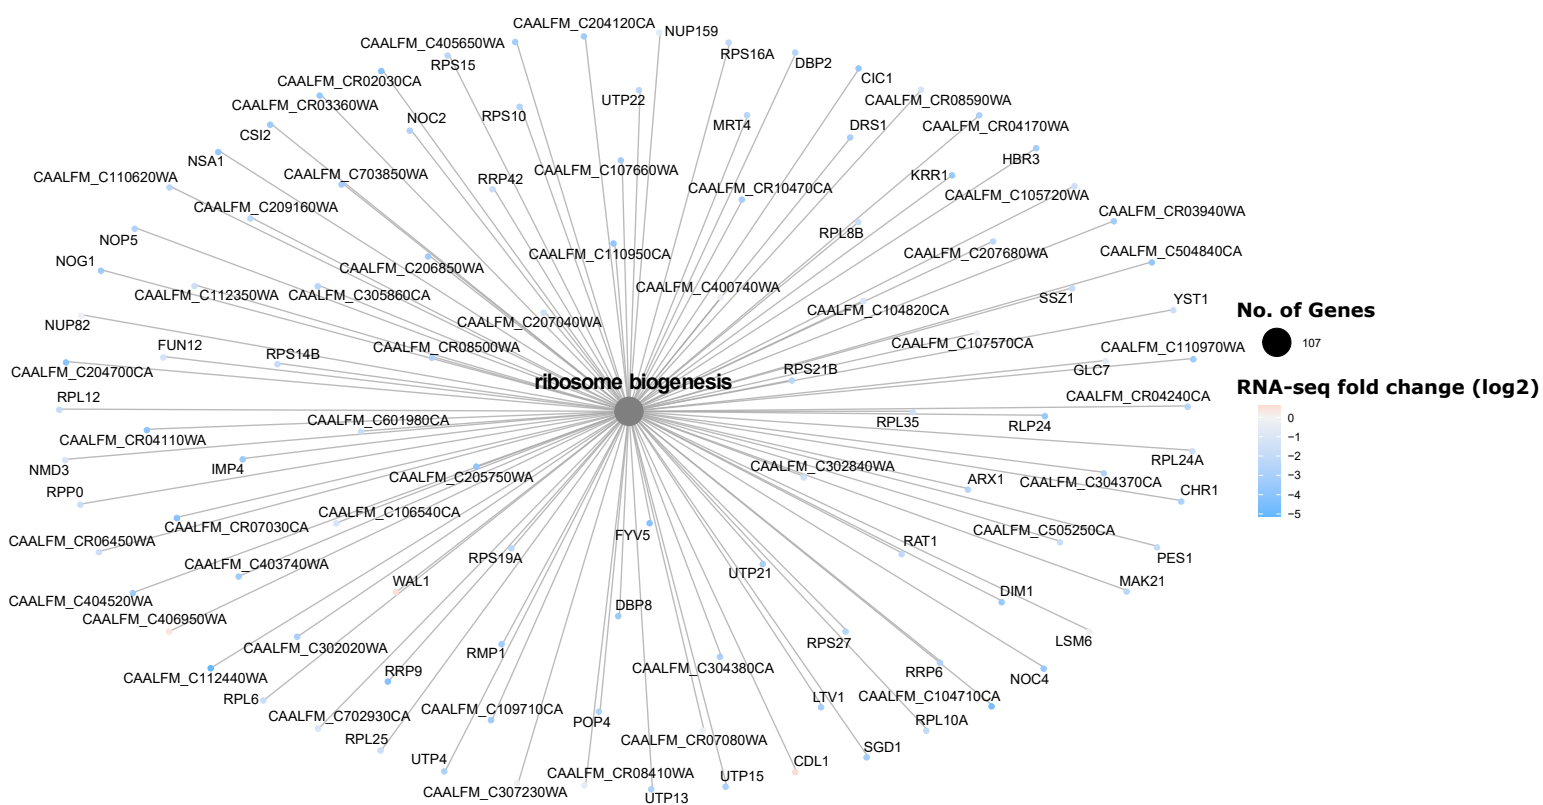

Supplement: s1 [file s1]

# Figure S1

## A

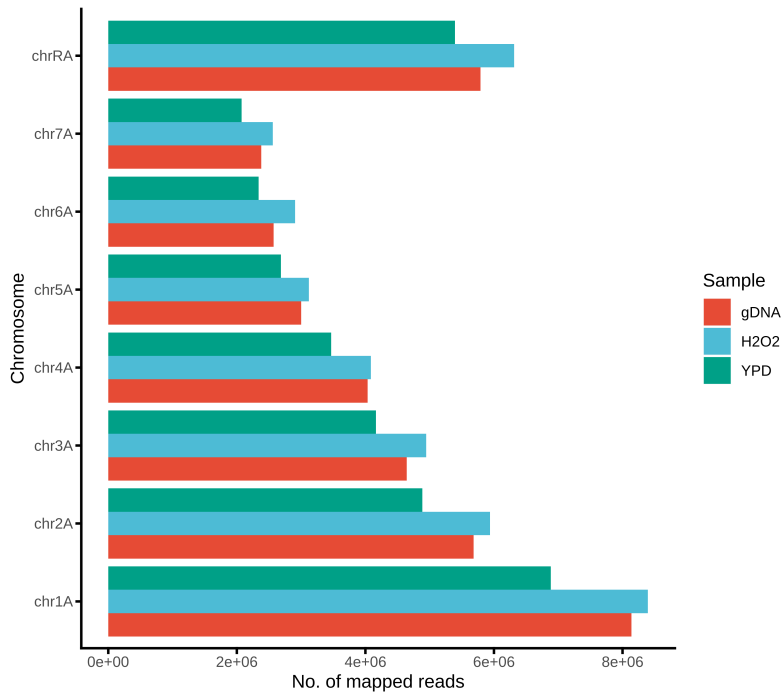

## B

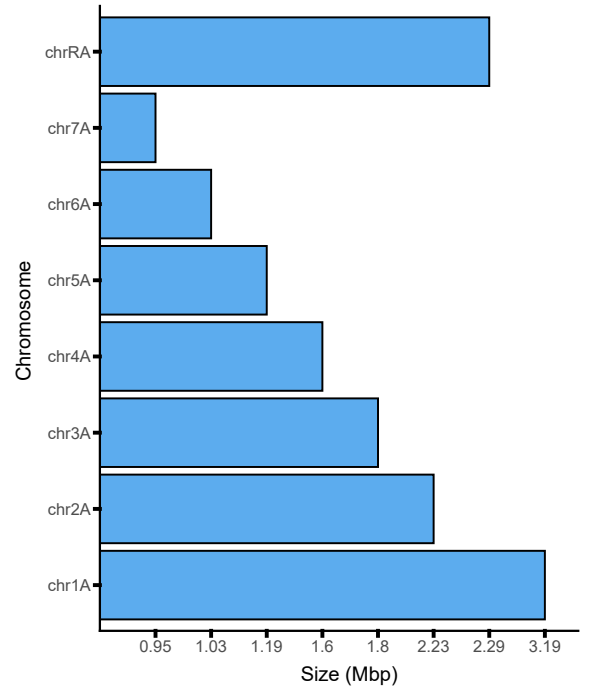

Supplement: s1 [file s1]
